# Supplementary material for: Trajectories and Forces in Four-Electrode Chambers Operated in Object-Shift, Dielectrophoresis and Field-Cage Modes – Considerations from the System’s Point of View
Source: Preprints.org preprint supplement (doi:10.20944/preprints202309.2147.v1), 2023-09-30
Supplement: Supplementary file 2 [file Tab. S1_++-- 1-in-0,1.xls]

## Sheet: Four Side Pointed +-+-__Obj_0
Basic Resistance	Basic Conductance	Mean Resistance	Mean Conductance	k		a_X	a_y	a_Resistance in Route	a_Conductance along trajectory	a_Trajectory length		a_Delta Cond	a_Step width along trajectory	a_Mid-distance	a_norm. Force (Delta Cond./basic/diSTep)		b_X	b_Y	b_Resistance in Routh	b_Conductance along trajectory	b_Trajectory length		b-Delta Cond	b_Step width along trajectory	b_Mid-distance	b_norm. Force (Delta Cond./basic/diSTep)		c_X	c_Y	c_Resistance in Routh	c_Conductance along trajectory	c_Trajectory length		c_Delta Cond	c_Step width along trajectory	c_Mid-distance	c_norm. Force (Delta Cond./basic/diSTep)		d_X	d_Y	d_Resistance in Routh	d_Conductance along trajectory	d_Trajectory length		d_Delta Cond	d_Step width along trajectory	d_Mid-distance	d_norm. Force (Delta Cond./basic/diSTep)
23.6349	0.0423103	23.2437	0.0430311	0.423103		-0.40201	0.40201	23.5353	0.0424894	0		1.4485e-06	0.000646055	0.000323027	0.052991		-0.201005	0.40201	23.1774	0.0431456	0		3.01205e-06	0.00045842	0.00022921	0.155293		0.40201	0.40201	23.6333	0.0423132	0		5.57562e-08	0.000646045	0.000323023	0.00203978		0.00502513	-0.00502513	23.2878	0.042941	0		6.16937e-08	0.000646055	0.000323027	0.00225697
						-0.401553	0.401553	23.5345	0.0424908	0.000646055		1.4485e-06	0.000646055	0.000969082	0.052991		-0.200548	0.401972	23.1757	0.0431486	0.00045842		3.01205e-06	0.000458309	0.000687574	0.155331		0.401553	0.401553	23.6333	0.0423132	0.000646045		5.57562e-08	0.000646046	0.000969068	0.00203978		0.00548196	-0.00548196	23.2877	0.042941	0.000646055		6.16937e-08	0.000646055	0.000969082	0.00225697
						-0.401096	0.401096	23.5337	0.0424923	0.00129211		1.4485e-06	0.000646055	0.00161514	0.052991		-0.200091	0.401935	23.1741	0.0431516	0.000916729		3.01157e-06	0.000458203	0.00114583	0.155342		0.401096	0.401096	23.6332	0.0423133	0.00129209		5.57562e-08	0.000646047	0.00161511	0.00203978		0.00593878	-0.00593878	23.2877	0.0429411	0.00129211		6.16937e-08	0.000646055	0.00161514	0.00225697
						-0.40064	0.40064	23.5329	0.0424937	0.00193816		1.4485e-06	0.000646055	0.00226119	0.052991		-0.199635	0.4019	23.1725	0.0431546	0.00137493		3.01109e-06	0.000458101	0.00160398	0.155352		0.40064	0.40064	23.6332	0.0423133	0.00193814		5.57563e-08	0.000646047	0.00226116	0.00203978		0.00639561	-0.00639561	23.2877	0.0429412	0.00193816		6.16937e-08	0.000646055	0.00226119	0.00225697
						-0.400183	0.400183	23.5321	0.0424952	0.00258422		1.4485e-06	0.000646055	0.00290725	0.052991		-0.199178	0.401866	23.1709	0.0431576	0.00183303		3.01062e-06	0.000458005	0.00206203	0.15536		0.400183	0.400183	23.6332	0.0423134	0.00258418		5.57563e-08	0.000646047	0.00290721	0.00203978		0.00685244	-0.00685244	23.2876	0.0429412	0.00258422		6.16937e-08	0.000646055	0.00290725	0.00225697
						-0.399726	0.399726	23.5313	0.0424966	0.00323027		1.4485e-06	0.000646055	0.0035533	0.052991		-0.198721	0.401833	23.1693	0.0431606	0.00229104		3.01016e-06	0.000457912	0.00251999	0.155368		0.399726	0.399726	23.6332	0.0423134	0.00323023		5.74899e-08	0.000646048	0.00355326	0.0021032		0.00730927	-0.00730927	23.2876	0.0429413	0.00323027		6.16937e-08	0.000646055	0.0035533	0.00225697
						-0.399269	0.399269	23.5305	0.0424981	0.00387633		1.4485e-06	0.000646055	0.00419935	0.052991		-0.198264	0.401801	23.1677	0.0431636	0.00274895		3.00969e-06	0.000457825	0.00297786	0.155373		0.399269	0.399269	23.6331	0.0423135	0.00387628		5.92239e-08	0.000646048	0.0041993	0.00216664		0.0077661	-0.0077661	23.2876	0.0429413	0.00387633		6.16937e-08	0.000646055	0.00419936	0.00225697
						-0.398812	0.398812	23.5297	0.0424995	0.00452238		1.4485e-06	0.000646055	0.00484541	0.052991		-0.197807	0.401771	23.166	0.0431666	0.00320677		3.00924e-06	0.000457742	0.00343565	0.155378		0.398812	0.398812	23.6331	0.0423136	0.00452233		5.9224e-08	0.000646049	0.00484535	0.00216664		0.00822293	-0.00822293	23.2875	0.0429414	0.00452238		6.16937e-08	0.000646055	0.00484541	0.00225697
						-0.398355	0.398355	23.5289	0.042501	0.00516844		1.4485e-06	0.000646055	0.00549146	0.052991		-0.19735	0.401742	23.1644	0.0431697	0.00366452		3.00878e-06	0.000457663	0.00389335	0.155381		0.398355	0.398355	23.6331	0.0423136	0.00516838		5.9224e-08	0.000646049	0.0054914	0.00216664		0.00867976	-0.00867976	23.2875	0.0429415	0.00516844		6.16937e-08	0.000646055	0.00549146	0.00225697
						-0.397899	0.397899	23.5281	0.0425024	0.00581449		1.4485e-06	0.000646055	0.00613752	0.052991		-0.196894	0.401715	23.1628	0.0431727	0.00412218		3.00833e-06	0.000457588	0.00435097	0.155383		0.397899	0.397899	23.633	0.0423137	0.00581443		5.9224e-08	0.00064605	0.00613745	0.00216664		0.00913659	-0.00913659	23.2875	0.0429415	0.00581449		6.16937e-08	0.000646055	0.00613752	0.00225697
						-0.397442	0.397442	23.5273	0.0425039	0.00646055		1.4485e-06	0.000646055	0.00678357	0.052991		-0.196437	0.401688	23.1612	0.0431757	0.00457977		3.00789e-06	0.000457518	0.00480853	0.155384		0.397442	0.397442	23.633	0.0423137	0.00646048		5.92241e-08	0.00064605	0.0067835	0.00216664		0.00959342	-0.00959342	23.2874	0.0429416	0.00646055		6.16937e-08	0.000646055	0.00678357	0.00225697
						-0.396985	0.396985	23.5265	0.0425053	0.0071066		1.51285e-06	0.000646055	0.00742963	0.0553453		-0.19598	0.401663	23.1596	0.0431787	0.00503728		3.07756e-06	0.000457451	0.00526601	0.159007		0.396985	0.396985	23.633	0.0423138	0.00710653		6.57922e-08	0.00064605	0.00742955	0.00240692		0.0100503	-0.0100503	23.2874	0.0429417	0.0071066		1.02651e-07	0.000646055	0.00742963	0.00375534
						-0.396528	0.396528	23.5256	0.0425068	0.00775266		1.51285e-06	0.000646055	0.00807568	0.0553453		-0.195523	0.401639	23.1579	0.0431818	0.00549474		3.14808e-06	0.000457381	0.00572343	0.162675		0.396528	0.396528	23.6329	0.0423139	0.00775258		6.57929e-08	0.00064605	0.0080756	0.00240695		0.0105071	-0.0105071	23.2874	0.0429418	0.00775266		1.02651e-07	0.000646055	0.00807568	0.00375534
						-0.396071	0.396071	23.5248	0.0425083	0.00839871		1.51285e-06	0.000646055	0.00872174	0.0553453		-0.195066	0.401617	23.1562	0.0431849	0.00595212		3.14787e-06	0.000457316	0.00618077	0.162688		0.396071	0.396071	23.6329	0.0423139	0.00839863		6.5793e-08	0.000646051	0.00872165	0.00240695		0.0109639	-0.0109639	23.2873	0.0429419	0.00839871		1.02651e-07	0.000646055	0.00872174	0.00375534
						-0.395614	0.395614	23.524	0.0425098	0.00904476		1.51285e-06	0.000646055	0.00936779	0.0553453		-0.194609	0.401596	23.1546	0.0431881	0.00640943		3.14767e-06	0.000457255	0.00663806	0.162699		0.395614	0.395615	23.6328	0.042314	0.00904468		6.5793e-08	0.000646051	0.0093677	0.00240695		0.0114207	-0.0114207	23.2872	0.042942	0.00904476		1.02651e-07	0.000646055	0.00936779	0.00375534
						-0.395158	0.395158	23.5231	0.0425114	0.00969082		1.51285e-06	0.000646055	0.0100138	0.0553453		-0.194153	0.401576	23.1529	0.0431912	0.00686669		3.14746e-06	0.000457199	0.00709529	0.162708		0.395158	0.395158	23.6328	0.0423141	0.00969073		6.5793e-08	0.000646052	0.0100138	0.00240695		0.0118776	-0.0118776	23.2872	0.0429421	0.00969082		1.02651e-07	0.000646055	0.0100138	0.00375534
						-0.394701	0.394701	23.5223	0.0425129	0.0103369		1.51285e-06	0.000646055	0.0106599	0.0553453		-0.193696	0.401558	23.1512	0.0431943	0.00732389		3.14726e-06	0.000457147	0.00755246	0.162716		0.394701	0.394701	23.6328	0.0423141	0.0103368		6.77361e-08	0.000646052	0.0106598	0.00247803		0.0123344	-0.0123344	23.2871	0.0429422	0.0103369		1.02651e-07	0.000646055	0.0106599	0.00375534
						-0.394244	0.394244	23.5215	0.0425144	0.0109829		1.51285e-06	0.000646055	0.011306	0.0553453		-0.193239	0.401541	23.1495	0.0431975	0.00778103		3.14706e-06	0.0004571	0.00800958	0.162723		0.394244	0.394244	23.6327	0.0423142	0.0109828		6.96803e-08	0.000646052	0.0113059	0.00254916		0.0127912	-0.0127912	23.2871	0.0429423	0.0109829		1.02651e-07	0.000646055	0.011306	0.00375534
						-0.393787	0.393787	23.5206	0.0425159	0.011629		1.51285e-06	0.000646055	0.011952	0.0553453		-0.192782	0.401525	23.1478	0.0432006	0.00823813		3.14686e-06	0.000457057	0.00846666	0.162728		0.393787	0.393787	23.6327	0.0423143	0.0116289		6.96804e-08	0.000646053	0.0119519	0.00254916		0.0132481	-0.0132481	23.287	0.0429424	0.011629		1.02651e-07	0.000646055	0.011952	0.00375534
						-0.39333	0.39333	23.5198	0.0425174	0.012275		1.51285e-06	0.000646055	0.0125981	0.0553453		-0.192325	0.401511	23.1461	0.0432038	0.00869519		3.14667e-06	0.000457018	0.0089237	0.162732		0.39333	0.39333	23.6327	0.0423143	0.0122749		6.96804e-08	0.000646053	0.012598	0.00254916		0.0137049	-0.0137049	23.287	0.0429425	0.012275		1.02651e-07	0.000646055	0.0125981	0.00375534
						-0.392873	0.392873	23.5189	0.0425189	0.0129211		1.51285e-06	0.000646055	0.0132441	0.0553453		-0.191868	0.401497	23.1444	0.0432069	0.00915221		3.14647e-06	0.000456983	0.0093807	0.162734		0.392873	0.392874	23.6326	0.0423144	0.012921		6.96804e-08	0.000646053	0.013244	0.00254916		0.0141617	-0.0141617	23.2869	0.0429426	0.0129211		1.02651e-07	0.000646055	0.0132441	0.00375534
						-0.392417	0.392417	23.5181	0.0425204	0.0135671		1.51285e-06	0.000646055	0.0138902	0.0553453		-0.191412	0.401486	23.1427	0.0432101	0.00960919		3.14628e-06	0.000456952	0.00983767	0.162735		0.392417	0.392417	23.6326	0.0423145	0.013567		6.96805e-08	0.000646054	0.0138901	0.00254916		0.0146185	-0.0146185	23.2869	0.0429427	0.0135671		1.02651e-07	0.000646055	0.0138902	0.00375534
						-0.39196	0.39196	23.5173	0.0425219	0.0142132		1.57512e-06	0.000646055	0.0145362	0.0576234		-0.190955	0.401475	23.1411	0.0432132	0.0100661		3.1973e-06	0.000456924	0.0102946	0.165384		0.39196	0.39196	23.6325	0.0423145	0.0142131		7.71842e-08	0.000646054	0.0145361	0.00282367		0.0150754	-0.0150754	23.2868	0.0429428	0.0142132		1.43349e-07	0.000646055	0.0145362	0.00524421
						-0.391503	0.391503	23.5164	0.0425235	0.0148593		1.57512e-06	0.000646055	0.0151823	0.0576234		-0.190498	0.401466	23.1394	0.0432164	0.0105231		3.28041e-06	0.000456905	0.0107515	0.16969		0.391503	0.391503	23.6325	0.0423146	0.0148592		7.71854e-08	0.000646054	0.0151822	0.00282371		0.0155322	-0.0155322	23.2867	0.0429429	0.0148593		1.43349e-07	0.000646055	0.0151823	0.00524421
						-0.391046	0.391046	23.5155	0.0425251	0.0155053		1.57512e-06	0.000646055	0.0158283	0.0576234		-0.190041	0.401457	23.1376	0.0432197	0.01098		3.30064e-06	0.000456888	0.0112084	0.170743		0.391046	0.391046	23.6325	0.0423147	0.0155052		7.71854e-08	0.000646054	0.0158282	0.00282371		0.015989	-0.015989	23.2866	0.0429431	0.0155053		1.43349e-07	0.000646055	0.0158283	0.00524421
						-0.390589	0.390589	23.5147	0.0425267	0.0161514		1.57512e-06	0.000646055	0.0164744	0.0576234		-0.189584	0.40145	23.1358	0.043223	0.0114369		3.30072e-06	0.000456874	0.0116653	0.170752		0.390589	0.390589	23.6324	0.0423148	0.0161513		7.71854e-08	0.000646054	0.0164743	0.00282371		0.0164459	-0.0164459	23.2866	0.0429432	0.0161514		1.43349e-07	0.000646055	0.0164744	0.00524421
						-0.390132	0.390132	23.5138	0.0425282	0.0167974		1.57512e-06	0.000646055	0.0171204	0.0576234		-0.189127	0.401444	23.1341	0.0432263	0.0118937		3.3008e-06	0.000456861	0.0121222	0.170761		0.390132	0.390133	23.6324	0.0423148	0.0167973		7.71854e-08	0.000646054	0.0171203	0.00282371		0.0169027	-0.0169027	23.2865	0.0429434	0.0167974		1.43349e-07	0.000646055	0.0171204	0.00524421
						-0.389676	0.389676	23.5129	0.0425298	0.0174435		1.57512e-06	0.000646055	0.0177665	0.0576234		-0.188671	0.401438	23.1323	0.0432296	0.0123506		3.30087e-06	0.000456851	0.012579	0.170769		0.389676	0.389676	23.6323	0.0423149	0.0174434		7.93498e-08	0.000646054	0.0177664	0.00290289		0.0173595	-0.0173595	23.2864	0.0429435	0.0174435		1.43349e-07	0.000646055	0.0177665	0.00524421
						-0.389219	0.389219	23.512	0.0425314	0.0180895		1.57512e-06	0.000646055	0.0184126	0.0576234		-0.188214	0.401434	23.1305	0.0432329	0.0128074		3.30095e-06	0.000456843	0.0130359	0.170776		0.389219	0.389219	23.6323	0.042315	0.0180894		8.15156e-08	0.000646054	0.0184124	0.00298213		0.0178164	-0.0178164	23.2863	0.0429436	0.0180895		1.43349e-07	0.000646055	0.0184126	0.00524421
						-0.388762	0.388762	23.5112	0.042533	0.0187356		1.57512e-06	0.000646055	0.0190586	0.0576234		-0.187757	0.401431	23.1288	0.0432362	0.0132643		3.30102e-06	0.000456837	0.0134927	0.170782		0.388762	0.388762	23.6322	0.0423151	0.0187355		8.15156e-08	0.000646054	0.0190585	0.00298213		0.0182732	-0.0182732	23.2863	0.0429438	0.0187356		1.43349e-07	0.000646055	0.0190586	0.00524421
						-0.388305	0.388305	23.5103	0.0425345	0.0193816		1.57512e-06	0.000646055	0.0197047	0.0576234		-0.1873	0.401428	23.127	0.0432395	0.0137211		3.3011e-06	0.000456832	0.0139495	0.170787		0.388305	0.388305	23.6322	0.0423152	0.0193815		8.15156e-08	0.000646054	0.0197046	0.00298213		0.01873	-0.01873	23.2862	0.0429439	0.0193816		1.43349e-07	0.000646055	0.0197047	0.00524421
						-0.387848	0.387848	23.5094	0.0425361	0.0200277		1.57512e-06	0.000646055	0.0203507	0.0576234		-0.186843	0.401427	23.1252	0.0432428	0.014178		3.30117e-06	0.00045683	0.0144064	0.170792		0.387848	0.387848	23.6321	0.0423152	0.0200276		8.15156e-08	0.000646054	0.0203506	0.00298213		0.0191868	-0.0191868	23.2861	0.0429441	0.0200277		1.43349e-07	0.000646055	0.0203507	0.00524421
						-0.387392	0.387392	23.5086	0.0425377	0.0206737		1.57512e-06	0.000646055	0.0209968	0.0576234		-0.186386	0.401426	23.1235	0.0432461	0.0146348		3.30124e-06	0.00045683	0.0148632	0.170796		0.387392	0.387392	23.6321	0.0423153	0.0206736		8.15156e-08	0.000646054	0.0209967	0.00298213		0.0196437	-0.0196437	23.286	0.0429442	0.0206737		1.43349e-07	0.000646055	0.0209968	0.00524421
						-0.386935	0.386935	23.5077	0.0425393	0.0213198		1.63486e-06	0.000646055	0.0216428	0.0598087		-0.18593	0.401426	23.1217	0.0432494	0.0150916		3.35055e-06	0.000456831	0.01532	0.173346		0.386935	0.386935	23.6321	0.0423154	0.0213197		9.00428e-08	0.000646054	0.0216427	0.00329408		0.0201005	-0.0201005	23.2859	0.0429444	0.0213198		1.83678e-07	0.000646055	0.0216428	0.00671959
						-0.386478	0.386478	23.5068	0.0425409	0.0219659		1.63486e-06	0.000646055	0.0222889	0.0598087		-0.185473	0.401427	23.1199	0.0432528	0.0155484		3.43725e-06	0.000456832	0.0157769	0.177832		0.386478	0.386478	23.632	0.0423155	0.0219657		9.00442e-08	0.000646054	0.0222888	0.00329413		0.0205573	-0.0205573	23.2858	0.0429445	0.0219659		1.83678e-07	0.000646055	0.0222889	0.00671959
						-0.386021	0.386021	23.5059	0.0425425	0.0226119		1.63486e-06	0.000646055	0.0229349	0.0598087		-0.185016	0.401429	23.1181	0.0432562	0.0160053		3.47018e-06	0.000456832	0.0162337	0.179535		0.386021	0.386021	23.632	0.0423156	0.0226118		9.00442e-08	0.000646054	0.0229348	0.00329413		0.0210142	-0.0210142	23.2857	0.0429447	0.0226119		1.83678e-07	0.000646055	0.0229349	0.00671959
						-0.385564	0.385564	23.505	0.0425442	0.023258		1.63486e-06	0.000646055	0.023581	0.0598087		-0.184559	0.40143	23.1162	0.0432597	0.0164621		3.47024e-06	0.000456833	0.0166905	0.179538		0.385564	0.385564	23.6319	0.0423157	0.0232579		9.00442e-08	0.000646054	0.0235809	0.00329413		0.021471	-0.021471	23.2856	0.0429449	0.023258		1.83678e-07	0.000646055	0.023581	0.00671959
						-0.385107	0.385107	23.5041	0.0425458	0.023904		1.63486e-06	0.000646055	0.024227	0.0598087		-0.184102	0.401432	23.1144	0.0432631	0.0169189		3.47029e-06	0.000456833	0.0171474	0.17954		0.385107	0.385108	23.6319	0.0423158	0.0239039		9.00442e-08	0.000646054	0.0242269	0.00329413		0.0219278	-0.0219278	23.2855	0.0429451	0.023904		1.83678e-07	0.000646055	0.024227	0.00671959
						-0.384651	0.384651	23.5032	0.0425474	0.0245501		1.63486e-06	0.000646055	0.0248731	0.0598087		-0.183646	0.401433	23.1125	0.0432666	0.0173758		3.47034e-06	0.000456834	0.0176042	0.179543		0.384651	0.384651	23.6318	0.0423159	0.02455		9.24402e-08	0.000646054	0.024873	0.00338178		0.0223847	-0.0223847	23.2854	0.0429453	0.0245501		1.83678e-07	0.000646055	0.0248731	0.00671959
						-0.384194	0.384194	23.5023	0.0425491	0.0251961		1.63486e-06	0.000646055	0.0255192	0.0598087		-0.183189	0.401435	23.1107	0.0432701	0.0178326		3.47039e-06	0.000456834	0.018061	0.179545		0.384194	0.384194	23.6317	0.042316	0.025196		9.48378e-08	0.000646054	0.025519	0.0034695		0.0228415	-0.0228415	23.2853	0.0429455	0.0251961		1.83678e-07	0.000646055	0.0255192	0.00671959
						-0.383737	0.383737	23.5014	0.0425507	0.0258422		1.63486e-06	0.000646055	0.0261652	0.0598087		-0.182732	0.401438	23.1088	0.0432736	0.0182894		3.47044e-06	0.000456835	0.0185179	0.179547		0.383737	0.383737	23.6317	0.042316	0.0258421		9.48378e-08	0.000646054	0.0261651	0.0034695		0.0232983	-0.0232983	23.2852	0.0429456	0.0258422		1.83678e-07	0.000646055	0.0261652	0.00671959
						-0.38328	0.38328	23.5005	0.0425524	0.0264882		1.63486e-06	0.000646055	0.0268113	0.0598087		-0.182275	0.40144	23.107	0.043277	0.0187463		3.47049e-06	0.000456836	0.0189747	0.17955		0.38328	0.38328	23.6316	0.0423161	0.0264881		9.48378e-08	0.000646054	0.0268112	0.0034695		0.0237551	-0.0237551	23.2852	0.0429458	0.0264882		1.83678e-07	0.000646055	0.0268113	0.00671959
						-0.382823	0.382823	23.4996	0.042554	0.0271343		1.63486e-06	0.000646055	0.0274573	0.0598087		-0.181818	0.401442	23.1051	0.0432805	0.0192031		3.47054e-06	0.000456837	0.0194315	0.179552		0.382823	0.382823	23.6316	0.0423162	0.0271342		9.48378e-08	0.000646054	0.0274572	0.0034695		0.024212	-0.024212	23.2851	0.042946	0.0271343		1.83678e-07	0.000646055	0.0274573	0.00671959
						-0.382366	0.382366	23.4987	0.0425556	0.0277803		1.63486e-06	0.000646055	0.0281034	0.0598087		-0.181361	0.401445	23.1032	0.043284	0.01966		3.47058e-06	0.000456837	0.0198884	0.179554		0.382366	0.382367	23.6315	0.0423163	0.0277802		9.48378e-08	0.000646054	0.0281033	0.0034695		0.0246688	-0.0246688	23.285	0.0429462	0.0277803		1.83678e-07	0.000646055	0.0281034	0.00671959
						-0.38191	0.38191	23.4978	0.0425573	0.0284264		1.69159e-06	0.000646055	0.0287494	0.0618841		-0.180905	0.401447	23.1014	0.0432874	0.0201168		3.51712e-06	0.000456838	0.0203452	0.181961		0.38191	0.38191	23.6315	0.0423164	0.0284263		1.04479e-07	0.000646054	0.0287493	0.00382221		0.0251256	-0.0251256	23.2849	0.0429464	0.0284264		2.23525e-07	0.000646055	0.0287494	0.00817733
						-0.381453	0.381453	23.4968	0.0425589	0.0290725		1.69159e-06	0.000646055	0.0293955	0.0618841		-0.180448	0.40145	23.0995	0.043291	0.0205736		3.62266e-06	0.000456839	0.020802	0.187421		0.381453	0.381453	23.6314	0.0423165	0.0290723		1.04481e-07	0.000646054	0.0293954	0.00382227		0.0255825	-0.0255825	23.2847	0.0429466	0.0290725		2.23525e-07	0.000646055	0.0293955	0.00817733
						-0.380996	0.380996	23.4959	0.0425606	0.0297185		1.69159e-06	0.000646055	0.0300415	0.0618841		-0.179991	0.401453	23.0976	0.0432946	0.0210305		3.65322e-06	0.00045684	0.0212589	0.189002		0.380996	0.380996	23.6314	0.0423166	0.0297184		1.04481e-07	0.000646054	0.0300414	0.00382227		0.0260393	-0.0260393	23.2846	0.0429468	0.0297185		2.23525e-07	0.000646055	0.0300415	0.00817733
						-0.380539	0.380539	23.495	0.0425623	0.0303646		1.69159e-06	0.000646055	0.0306876	0.0618841		-0.179534	0.401456	23.0956	0.0432982	0.0214873		3.65331e-06	0.000456841	0.0217157	0.189006		0.380539	0.380539	23.6313	0.0423167	0.0303644		1.04481e-07	0.000646054	0.0306875	0.00382227		0.0264961	-0.0264961	23.2845	0.042947	0.0303646		2.23525e-07	0.000646055	0.0306876	0.00817733
						-0.380082	0.380082	23.494	0.042564	0.0310106		1.69159e-06	0.000646055	0.0313336	0.0618841		-0.179077	0.401459	23.0937	0.0433019	0.0219441		3.6534e-06	0.000456842	0.0221726	0.18901		0.380082	0.380082	23.6313	0.0423168	0.0310105		1.04481e-07	0.000646054	0.0313335	0.00382227		0.0269529	-0.0269529	23.2844	0.0429473	0.0310106		2.23525e-07	0.000646055	0.0313336	0.00817733
						-0.379625	0.379625	23.4931	0.0425657	0.0316567		1.69159e-06	0.000646055	0.0319797	0.0618841		-0.17862	0.401463	23.0917	0.0433055	0.022401		3.65348e-06	0.000456843	0.0226294	0.189014		0.379625	0.379626	23.6312	0.0423169	0.0316566		1.07116e-07	0.000646054	0.0319796	0.00391869		0.0274098	-0.0274098	23.2842	0.0429475	0.0316567		2.23525e-07	0.000646055	0.0319797	0.00817733
						-0.379169	0.379169	23.4922	0.0425674	0.0323027		1.69159e-06	0.000646055	0.0326258	0.0618841		-0.178164	0.401466	23.0898	0.0433092	0.0228578		3.65357e-06	0.000456844	0.0230863	0.189018		0.379169	0.379169	23.6311	0.0423171	0.0323026		1.09754e-07	0.000646054	0.0326256	0.00401518		0.0278666	-0.0278666	23.2841	0.0429477	0.0323027		2.23525e-07	0.000646055	0.0326258	0.00817733
						-0.378712	0.378712	23.4912	0.0425691	0.0329488		1.69159e-06	0.000646055	0.0332718	0.0618841		-0.177707	0.40147	23.0878	0.0433128	0.0233147		3.65364e-06	0.000456845	0.0235431	0.189022		0.378712	0.378712	23.6311	0.0423172	0.0329487		1.09754e-07	0.000646054	0.0332717	0.00401518		0.0283234	-0.0283234	23.284	0.0429479	0.0329488		2.23525e-07	0.000646055	0.0332718	0.00817733
						-0.378255	0.378255	23.4903	0.0425708	0.0335948		1.69159e-06	0.000646055	0.0339179	0.0618841		-0.17725	0.401474	23.0859	0.0433165	0.0237715		3.65372e-06	0.000456846	0.0239999	0.189025		0.378255	0.378255	23.631	0.0423173	0.0335947		1.09754e-07	0.000646054	0.0339177	0.00401518		0.0287803	-0.0287803	23.2839	0.0429482	0.0335948		2.23525e-07	0.000646055	0.0339179	0.00817733
						-0.377798	0.377798	23.4894	0.0425725	0.0342409		1.69159e-06	0.000646055	0.0345639	0.0618841		-0.176793	0.401478	23.0839	0.0433201	0.0242284		3.65379e-06	0.000456847	0.0244568	0.189028		0.377798	0.377798	23.6309	0.0423174	0.0342408		1.09754e-07	0.000646054	0.0345638	0.00401518		0.0292371	-0.0292371	23.2838	0.0429484	0.0342409		2.23525e-07	0.000646055	0.0345639	0.00817733
						-0.377341	0.377341	23.4884	0.0425742	0.0348869		1.69159e-06	0.000646055	0.03521	0.0618841		-0.176336	0.401482	23.082	0.0433238	0.0246852		3.65387e-06	0.000456848	0.0249136	0.189032		0.377341	0.377341	23.6309	0.0423175	0.0348868		1.09754e-07	0.000646054	0.0352099	0.00401518		0.0296939	-0.0296939	23.2836	0.0429486	0.0348869		2.23525e-07	0.000646055	0.03521	0.00817733
						-0.376884	0.376884	23.4875	0.0425759	0.035533		1.74483e-06	0.000646055	0.035856	0.063832		-0.175879	0.401486	23.0801	0.0433275	0.0251421		3.69671e-06	0.000456849	0.0253705	0.191248		0.376884	0.376885	23.6308	0.0423176	0.0355329		1.20601e-07	0.000646054	0.0358559	0.00441202		0.0301508	-0.0301508	23.2835	0.0429488	0.035533		2.6277e-07	0.000646055	0.035856	0.00961305
						-0.376428	0.376428	23.4865	0.0425776	0.0361791		1.74483e-06	0.000646055	0.0365021	0.063832		-0.175423	0.40149	23.0781	0.0433312	0.0255989		3.83028e-06	0.00045685	0.0258273	0.198158		0.376428	0.376428	23.6308	0.0423177	0.0361789		1.20603e-07	0.000646054	0.036502	0.00441209		0.0306076	-0.0306076	23.2834	0.0429491	0.0361791		2.6277e-07	0.000646055	0.0365021	0.00961305
						-0.375971	0.375971	23.4856	0.0425794	0.0368251		1.74483e-06	0.000646055	0.0371481	0.063832		-0.174966	0.401494	23.076	0.043335	0.0260558		3.85163e-06	0.000456851	0.0262842	0.199262		0.375971	0.375971	23.6307	0.0423178	0.036825		1.20603e-07	0.000646054	0.037148	0.00441209		0.0310644	-0.0310644	23.2832	0.0429494	0.0368251		2.6277e-07	0.000646055	0.0371481	0.00961305
						-0.375514	0.375514	23.4846	0.0425811	0.0374712		1.74483e-06	0.000646055	0.0377942	0.063832		-0.174509	0.401499	23.074	0.0433388	0.0265126		3.85174e-06	0.000456852	0.026741	0.199267		0.375514	0.375514	23.6306	0.042318	0.037471		1.20603e-07	0.000646054	0.0377941	0.00441209		0.0315212	-0.0315212	23.2831	0.0429496	0.0374712		2.6277e-07	0.000646055	0.0377942	0.00961305
						-0.375057	0.375057	23.4836	0.0425828	0.0381172		1.74483e-06	0.000646055	0.0384402	0.063832		-0.174052	0.401503	23.0719	0.0433427	0.0269695		3.85184e-06	0.000456853	0.0271979	0.199272		0.375057	0.375057	23.6306	0.0423181	0.0381171		1.20603e-07	0.000646054	0.0384401	0.00441209		0.0319781	-0.0319781	23.2829	0.0429499	0.0381172		2.6277e-07	0.000646055	0.0384402	0.00961305
						-0.3746	0.3746	23.4827	0.0425846	0.0387633		1.74483e-06	0.000646055	0.0390863	0.063832		-0.173595	0.401508	23.0699	0.0433465	0.0274263		3.85194e-06	0.000456855	0.0276547	0.199276		0.3746	0.3746	23.6305	0.0423182	0.0387632		1.23484e-07	0.000646054	0.0390862	0.00451748		0.0324349	-0.0324349	23.2828	0.0429501	0.0387633		2.6277e-07	0.000646055	0.0390863	0.00961305
						-0.374143	0.374143	23.4817	0.0425863	0.0394093		1.74483e-06	0.000646055	0.0397324	0.063832		-0.173138	0.401513	23.0678	0.0433504	0.0278832		3.85204e-06	0.000456856	0.0281116	0.199281		0.374143	0.374144	23.6304	0.0423183	0.0394092		1.26367e-07	0.000646054	0.0397322	0.00462294		0.0328917	-0.0328917	23.2827	0.0429504	0.0394093		2.6277e-07	0.000646055	0.0397324	0.00961305
						-0.373687	0.373687	23.4807	0.0425881	0.0400554		1.74483e-06	0.000646055	0.0403784	0.063832		-0.172682	0.401518	23.0658	0.0433542	0.02834		3.85212e-06	0.000456857	0.0285685	0.199285		0.373687	0.373687	23.6304	0.0423185	0.0400553		1.26367e-07	0.000646054	0.0403783	0.00462294		0.0333486	-0.0333486	23.2825	0.0429507	0.0400554		2.6277e-07	0.000646055	0.0403784	0.00961305
						-0.37323	0.37323	23.4798	0.0425898	0.0407014		1.74483e-06	0.000646055	0.0410245	0.063832		-0.172225	0.401523	23.0637	0.0433581	0.0287969		3.85221e-06	0.000456857	0.0290253	0.199289		0.37323	0.37323	23.6303	0.0423186	0.0407013		1.26367e-07	0.000646054	0.0410243	0.00462294		0.0338054	-0.0338054	23.2824	0.0429509	0.0407014		2.6277e-07	0.000646055	0.0410245	0.00961305
						-0.372773	0.372773	23.4788	0.0425916	0.0413475		1.74483e-06	0.000646055	0.0416705	0.063832		-0.171768	0.401528	23.0617	0.0433619	0.0292537		3.85229e-06	0.000456858	0.0294822	0.199292		0.372773	0.372773	23.6302	0.0423187	0.0413474		1.26367e-07	0.000646054	0.0416704	0.00462294		0.0342622	-0.0342622	23.2822	0.0429512	0.0413475		2.6277e-07	0.000646055	0.0416705	0.00961305
						-0.372316	0.372316	23.4779	0.0425933	0.0419935		1.74483e-06	0.000646055	0.0423166	0.063832		-0.171311	0.401533	23.0596	0.0433658	0.0297106		3.85236e-06	0.000456859	0.029939	0.199296		0.372316	0.372316	23.6301	0.0423188	0.0419934		1.26367e-07	0.000646054	0.0423164	0.00462294		0.034719	-0.034719	23.2821	0.0429515	0.0419936		2.6277e-07	0.000646055	0.0423166	0.00961305
						-0.371859	0.371859	23.4769	0.0425951	0.0426396		1.7941e-06	0.000646055	0.0429626	0.0656344		-0.170854	0.401538	23.0576	0.0433697	0.0301675		3.89031e-06	0.00045686	0.0303959	0.201259		0.371859	0.371859	23.6301	0.042319	0.0426395		1.38513e-07	0.000646054	0.0429625	0.0050673		0.0351759	-0.0351759	23.282	0.0429517	0.0426396		3.01286e-07	0.000646055	0.0429626	0.0110221
						-0.371402	0.371402	23.4759	0.0425969	0.0432857		1.7941e-06	0.000646055	0.0436087	0.0656344		-0.170397	0.401543	23.0555	0.0433735	0.0306243		4.06279e-06	0.000456861	0.0308528	0.210182		0.371402	0.371403	23.63	0.0423191	0.0432855		1.38516e-07	0.000646054	0.0436086	0.00506739		0.0356327	-0.0356327	23.2818	0.042952	0.0432857		3.01286e-07	0.000646055	0.0436087	0.0110221
						-0.370946	0.370946	23.4749	0.0425986	0.0439317		1.7941e-06	0.000646055	0.0442547	0.0656344		-0.169941	0.401549	23.0534	0.0433776	0.0310812		4.06671e-06	0.000456862	0.0313096	0.210384		0.370946	0.370946	23.6299	0.0423192	0.0439316		1.38516e-07	0.000646054	0.0442546	0.00506739		0.0360895	-0.0360895	23.2816	0.0429523	0.0439317		3.01286e-07	0.000646055	0.0442547	0.0110221
						-0.370489	0.370489	23.4739	0.0426004	0.0445778		1.7941e-06	0.000646055	0.0449008	0.0656344		-0.169484	0.401554	23.0512	0.0433817	0.031538		4.06681e-06	0.000456863	0.0317665	0.210389		0.370489	0.370489	23.6298	0.0423194	0.0445776		1.38516e-07	0.000646054	0.0449007	0.00506739		0.0365464	-0.0365464	23.2815	0.0429526	0.0445778		3.01286e-07	0.000646055	0.0449008	0.0110221
						-0.370032	0.370032	23.4729	0.0426022	0.0452238		1.7941e-06	0.000646055	0.0455469	0.0656344		-0.169027	0.40156	23.049	0.0433857	0.0319949		4.06691e-06	0.000456864	0.0322233	0.210393		0.370032	0.370032	23.6298	0.0423195	0.0452237		1.38516e-07	0.000646054	0.0455467	0.00506739		0.0370032	-0.0370032	23.2813	0.0429529	0.0452238		3.01286e-07	0.000646055	0.0455469	0.0110221
						-0.369575	0.369575	23.472	0.042604	0.0458699		1.7941e-06	0.000646055	0.0461929	0.0656344		-0.16857	0.401565	23.0469	0.0433898	0.0324518		4.06699e-06	0.000456864	0.0326802	0.210397		0.369575	0.369575	23.6297	0.0423197	0.0458697		1.41644e-07	0.000646054	0.0461928	0.00518183		0.03746	-0.03746	23.2811	0.0429532	0.0458699		3.01286e-07	0.000646055	0.0461929	0.0110221
						-0.369118	0.369118	23.471	0.0426058	0.0465159		1.7941e-06	0.000646055	0.046839	0.0656344		-0.168113	0.401571	23.0447	0.0433939	0.0329086		4.06707e-06	0.000456865	0.0331371	0.210401		0.369118	0.369119	23.6296	0.0423198	0.0465158		1.44775e-07	0.000646054	0.0468388	0.00529636		0.0379169	-0.0379169	23.281	0.0429535	0.0465159		3.01286e-07	0.000646055	0.046839	0.0110221
						-0.368661	0.368661	23.47	0.0426076	0.047162		1.7941e-06	0.000646055	0.047485	0.0656344		-0.167656	0.401576	23.0426	0.0433979	0.0333655		4.06714e-06	0.000456866	0.0335939	0.210404		0.368661	0.368662	23.6295	0.0423199	0.0471619		1.44775e-07	0.000646054	0.0474849	0.00529636		0.0383737	-0.0383737	23.2808	0.0429538	0.047162		3.01286e-07	0.000646055	0.047485	0.0110221
						-0.368205	0.368205	23.469	0.0426094	0.047808		1.7941e-06	0.000646055	0.0481311	0.0656344		-0.1672	0.401582	23.0404	0.043402	0.0338224		4.0672e-06	0.000456866	0.0340508	0.210407		0.368205	0.368205	23.6294	0.0423201	0.0478079		1.44775e-07	0.000646054	0.0481309	0.00529636		0.0388305	-0.0388305	23.2806	0.0429541	0.047808		3.01286e-07	0.000646055	0.0481311	0.0110221
						-0.367748	0.367748	23.468	0.0426112	0.0484541		1.7941e-06	0.000646055	0.0487771	0.0656344		-0.166743	0.401588	23.0383	0.0434061	0.0342792		4.06725e-06	0.000456867	0.0345077	0.21041		0.367748	0.367748	23.6294	0.0423202	0.048454		1.44775e-07	0.000646054	0.048777	0.00529636		0.0392873	-0.0392873	23.2805	0.0429544	0.0484541		3.01286e-07	0.000646055	0.0487771	0.0110221
						-0.367291	0.367291	23.467	0.042613	0.0491002		1.7941e-06	0.000646055	0.0494232	0.0656344		-0.166286	0.401594	23.0361	0.0434101	0.0347361		4.0673e-06	0.000456867	0.0349645	0.210412		0.367291	0.367291	23.6293	0.0423204	0.0491		1.44775e-07	0.000646054	0.049423	0.00529636		0.0397442	-0.0397442	23.2803	0.0429547	0.0491002		3.01286e-07	0.000646055	0.0494232	0.0110221
						-0.366834	0.366834	23.466	0.0426148	0.0497462		1.83891e-06	0.000646055	0.0500692	0.0672736		-0.165829	0.4016	23.0339	0.0434142	0.035193		4.12162e-06	0.000456868	0.0354214	0.213221		0.366834	0.366834	23.6292	0.0423205	0.0497461		1.58312e-07	0.000646054	0.0500691	0.00579159		0.040201	-0.040201	23.2802	0.042955	0.0497462		3.38936e-07	0.000646055	0.0500692	0.0123995
						-0.366377	0.366377	23.465	0.0426166	0.0503923		1.83891e-06	0.000646055	0.0507153	0.0672736		-0.165372	0.401606	23.0317	0.0434183	0.0356498		4.29976e-06	0.000456868	0.0358783	0.222437		0.366377	0.366378	23.6291	0.0423207	0.0503921		1.58315e-07	0.000646054	0.0507152	0.0057917		0.0406578	-0.0406578	23.28	0.0429554	0.0503923		3.38936e-07	0.000646055	0.0507153	0.0123995
						-0.365921	0.365921	23.464	0.0426185	0.0510383		1.83891e-06	0.000646055	0.0513613	0.0672736		-0.164915	0.401612	23.0295	0.0434226	0.0361067		4.29982e-06	0.000456869	0.0363351	0.22244		0.365921	0.365921	23.629	0.0423208	0.0510382		1.58315e-07	0.000646054	0.0513612	0.0057917		0.0411147	-0.0411147	23.2798	0.0429557	0.0510383		3.38936e-07	0.000646055	0.0513613	0.0123995
						-0.365464	0.365464	23.463	0.0426203	0.0516844		1.83891e-06	0.000646055	0.0520074	0.0672736		-0.164459	0.401618	23.0272	0.0434269	0.0365636		4.29988e-06	0.000456869	0.036792	0.222443		0.365464	0.365464	23.6289	0.042321	0.0516842		1.58315e-07	0.000646054	0.0520073	0.0057917		0.0415715	-0.0415715	23.2796	0.0429561	0.0516844		3.38936e-07	0.000646055	0.0520074	0.0123995
						-0.365007	0.365007	23.462	0.0426221	0.0523304		1.83891e-06	0.000646055	0.0526535	0.0672736		-0.164002	0.401624	23.0249	0.0434312	0.0370204		4.29992e-06	0.00045687	0.0372489	0.222445		0.365007	0.365007	23.6288	0.0423212	0.0523303		1.58315e-07	0.000646054	0.0526533	0.0057917		0.0420283	-0.0420283	23.2794	0.0429564	0.0523304		3.38936e-07	0.000646055	0.0526535	0.0123995
						-0.36455	0.36455	23.461	0.042624	0.0529765		1.83891e-06	0.000646055	0.0532995	0.0672736		-0.163545	0.40163	23.0226	0.0434355	0.0374773		4.29996e-06	0.00045687	0.0377057	0.222447		0.36455	0.36455	23.6288	0.0423213	0.0529763		1.61689e-07	0.000646054	0.0532994	0.00591515		0.0424852	-0.0424852	23.2792	0.0429567	0.0529765		3.38936e-07	0.000646055	0.0532995	0.0123995
						-0.364093	0.364093	23.46	0.0426258	0.0536225		1.83891e-06	0.000646055	0.0539456	0.0672736		-0.163088	0.401636	23.0203	0.0434398	0.0379342		4.29999e-06	0.00045687	0.0381626	0.222448		0.364093	0.364093	23.6287	0.0423215	0.0536224		1.65066e-07	0.000646054	0.0539454	0.0060387		0.042942	-0.042942	23.2791	0.0429571	0.0536225		3.38936e-07	0.000646055	0.0539456	0.0123995
						-0.363636	0.363636	23.4589	0.0426277	0.0542686		1.83891e-06	0.000646055	0.0545916	0.0672736		-0.162631	0.401642	23.0181	0.0434441	0.0383911		4.30001e-06	0.00045687	0.0386195	0.222449		0.363636	0.363637	23.6286	0.0423216	0.0542684		1.65066e-07	0.000646054	0.0545915	0.0060387		0.0433988	-0.0433988	23.2789	0.0429574	0.0542686		3.38936e-07	0.000646055	0.0545916	0.0123995
						-0.36318	0.36318	23.4579	0.0426295	0.0549146		1.83891e-06	0.000646055	0.0552377	0.0672736		-0.162175	0.401648	23.0158	0.0434484	0.0388479		4.30002e-06	0.00045687	0.0390764	0.222449		0.36318	0.36318	23.6285	0.0423218	0.0549145		1.65066e-07	0.000646054	0.0552375	0.0060387		0.0438556	-0.0438556	23.2787	0.0429578	0.0549146		3.38936e-07	0.000646055	0.0552377	0.0123995
						-0.362723	0.362723	23.4569	0.0426313	0.0555607		1.83891e-06	0.000646055	0.0558837	0.0672736		-0.161718	0.401654	23.0135	0.0434527	0.0393048		4.30002e-06	0.00045687	0.0395332	0.222449		0.362723	0.362723	23.6284	0.042322	0.0555606		1.65066e-07	0.000646054	0.0558836	0.0060387		0.0443125	-0.0443125	23.2785	0.0429581	0.0555607		3.38936e-07	0.000646055	0.0558837	0.0123995
						-0.362266	0.362266	23.4559	0.0426332	0.0562068		1.83891e-06	0.000646055	0.0565298	0.0672736		-0.161261	0.40166	23.0112	0.043457	0.0397617		4.30001e-06	0.00045687	0.0399901	0.222449		0.362266	0.362266	23.6283	0.0423221	0.0562066		1.65066e-07	0.000646054	0.0565296	0.0060387		0.0447693	-0.0447693	23.2783	0.0429584	0.0562068		3.38936e-07	0.000646055	0.0565298	0.0123995
						-0.361809	0.361809	23.4549	0.042635	0.0568528		1.87878e-06	0.000646055	0.0571758	0.0687321		-0.160804	0.401666	23.009	0.0434613	0.0402185		4.38229e-06	0.00045687	0.040447	0.226706		0.361809	0.361809	23.6282	0.0423223	0.0568527		1.80084e-07	0.000646054	0.0571757	0.00658809		0.0452261	-0.0452261	23.2781	0.0429588	0.0568528		3.75576e-07	0.000646055	0.0571758	0.0137399
						-0.361352	0.361352	23.4539	0.0426369	0.0574989		1.87878e-06	0.000646055	0.0578219	0.0687321		-0.160347	0.401672	23.0066	0.0434657	0.0406754		4.55246e-06	0.00045687	0.0409038	0.235509		0.361352	0.361352	23.6281	0.0423225	0.0574987		1.80087e-07	0.000646054	0.0578217	0.00658822		0.045683	-0.045683	23.2779	0.0429591	0.0574989		3.75576e-07	0.000646055	0.0578219	0.0137399
						-0.360895	0.360895	23.4528	0.0426388	0.0581449		1.87878e-06	0.000646055	0.0584679	0.0687321		-0.15989	0.401678	23.0042	0.0434703	0.0411323		4.55245e-06	0.00045687	0.0413607	0.235508		0.360895	0.360896	23.628	0.0423227	0.0581448		1.80087e-07	0.000646054	0.0584678	0.00658822		0.0461398	-0.0461398	23.2777	0.0429595	0.0581449		3.75576e-07	0.000646055	0.0584679	0.0137399
						-0.360439	0.360439	23.4518	0.0426407	0.058791		1.87878e-06	0.000646055	0.059114	0.0687321		-0.159434	0.401684	23.0018	0.0434748	0.0415891		4.55243e-06	0.00045687	0.0418176	0.235508		0.360439	0.360439	23.6279	0.0423228	0.0587908		1.80087e-07	0.000646054	0.0591139	0.00658822		0.0465966	-0.0465966	23.2775	0.0429599	0.058791		3.75576e-07	0.000646055	0.059114	0.0137399
						-0.359982	0.359982	23.4508	0.0426425	0.059437		1.87878e-06	0.000646055	0.0597601	0.0687321		-0.158977	0.40169	22.9994	0.0434794	0.042046		4.5524e-06	0.00045687	0.0422744	0.235506		0.359982	0.359982	23.6278	0.042323	0.0594369		1.80087e-07	0.000646054	0.0597599	0.00658822		0.0470534	-0.0470534	23.2773	0.0429603	0.059437		3.75576e-07	0.000646055	0.0597601	0.0137399
						-0.359525	0.359525	23.4497	0.0426444	0.0600831		1.87878e-06	0.000646055	0.0604061	0.0687321		-0.15852	0.401697	22.997	0.0434839	0.0425029		4.55236e-06	0.00045687	0.0427313	0.235504		0.359525	0.359525	23.6277	0.0423232	0.0600829		1.83702e-07	0.000646054	0.060406	0.00672046		0.0475103	-0.0475103	23.2771	0.0429606	0.0600831		3.75576e-07	0.000646055	0.0604061	0.0137399
						-0.359068	0.359068	23.4487	0.0426463	0.0607291		1.87878e-06	0.000646055	0.0610522	0.0687321		-0.158063	0.401703	22.9946	0.0434885	0.0429598		4.55231e-06	0.000456869	0.0431882	0.235502		0.359068	0.359068	23.6276	0.0423234	0.060729		1.8732e-07	0.000646054	0.061052	0.00685283		0.0479671	-0.0479671	23.2769	0.042961	0.0607291		3.75576e-07	0.000646055	0.0610522	0.0137399
						-0.358611	0.358611	23.4477	0.0426482	0.0613752		1.87878e-06	0.000646055	0.0616982	0.0687321		-0.157606	0.401709	22.9922	0.043493	0.0434166		4.55225e-06	0.000456869	0.0436451	0.235499		0.358611	0.358611	23.6275	0.0423236	0.061375		1.8732e-07	0.000646054	0.0616981	0.00685283		0.0484239	-0.0484239	23.2767	0.0429614	0.0613752		3.75576e-07	0.000646055	0.0616982	0.0137399
						-0.358154	0.358154	23.4466	0.0426501	0.0620212		1.87878e-06	0.000646055	0.0623443	0.0687321		-0.157149	0.401715	22.9898	0.0434976	0.0438735		4.55219e-06	0.000456869	0.0441019	0.235495		0.358154	0.358155	23.6274	0.0423238	0.0620211		1.8732e-07	0.000646054	0.0623441	0.00685283		0.0488808	-0.0488808	23.2765	0.0429618	0.0620212		3.75576e-07	0.000646055	0.0623443	0.0137399
						-0.357698	0.357698	23.4456	0.0426519	0.0626673		1.87878e-06	0.000646055	0.0629903	0.0687321		-0.156693	0.401721	22.9874	0.0435021	0.0443304		4.55211e-06	0.000456868	0.0445588	0.235492		0.357698	0.357698	23.6273	0.0423239	0.0626671		1.8732e-07	0.000646054	0.0629902	0.00685283		0.0493376	-0.0493376	23.2763	0.0429621	0.0626673		3.75576e-07	0.000646055	0.0629903	0.0137399
						-0.357241	0.357241	23.4446	0.0426538	0.0633134		1.87878e-06	0.000646055	0.0636364	0.0687321		-0.156236	0.401726	22.985	0.0435067	0.0447872		4.55202e-06	0.000456868	0.0450157	0.235487		0.357241	0.357241	23.6272	0.0423241	0.0633132		1.8732e-07	0.000646054	0.0636362	0.00685283		0.0497944	-0.0497944	23.2761	0.0429625	0.0633134		3.75576e-07	0.000646055	0.0636364	0.0137399
						-0.356784	0.356784	23.4435	0.0426557	0.0639594		1.91325e-06	0.000646055	0.0642824	0.0699933		-0.155779	0.401732	22.9826	0.0435112	0.0452441		4.66963e-06	0.000456867	0.0454725	0.241572		0.356784	0.356784	23.6271	0.0423243	0.0639593		2.03904e-07	0.000646054	0.0642823	0.00745953		0.0502513	-0.0502513	23.2759	0.0429629	0.0639594		4.11048e-07	0.000646055	0.0642824	0.0150376
						-0.356327	0.356327	23.4425	0.0426576	0.0646055		1.91325e-06	0.000646055	0.0649285	0.0699933		-0.155322	0.401738	22.9801	0.0435159	0.045701		4.82649e-06	0.000456867	0.0459294	0.249687		0.356327	0.356327	23.627	0.0423245	0.0646053		2.03908e-07	0.000646054	0.0649283	0.00745967		0.0507081	-0.0507081	23.2757	0.0429633	0.0646055		4.11048e-07	0.000646055	0.0649285	0.0150376
						-0.35587	0.35587	23.4414	0.0426595	0.0652515		1.91325e-06	0.000646055	0.0655745	0.0699933		-0.154865	0.401744	22.9776	0.0435207	0.0461578		4.82639e-06	0.000456866	0.0463863	0.249682		0.35587	0.35587	23.6268	0.0423247	0.0652514		2.03908e-07	0.000646054	0.0655744	0.00745967		0.0511649	-0.0511649	23.2755	0.0429637	0.0652515		4.11048e-07	0.000646055	0.0655745	0.0150376
						-0.355413	0.355413	23.4404	0.0426614	0.0658976		1.91325e-06	0.000646055	0.0662206	0.0699933		-0.154408	0.40175	22.975	0.0435256	0.0466147		4.82627e-06	0.000456866	0.0468431	0.249676		0.355413	0.355414	23.6267	0.0423249	0.0658974		2.03908e-07	0.000646054	0.0662204	0.00745967		0.0516217	-0.0516217	23.2752	0.0429641	0.0658976		4.11048e-07	0.000646055	0.0662206	0.0150376
						-0.354957	0.354957	23.4393	0.0426633	0.0665436		1.91325e-06	0.000646055	0.0668667	0.0699933		-0.153952	0.401756	22.9725	0.0435304	0.0470716		4.82615e-06	0.000456865	0.0473	0.24967		0.354957	0.354957	23.6266	0.0423251	0.0665435		2.03908e-07	0.000646054	0.0668665	0.00745967		0.0520786	-0.0520786	23.275	0.0429645	0.0665436		4.11048e-07	0.000646055	0.0668667	0.0150376
						-0.3545	0.3545	23.4383	0.0426653	0.0671897		1.91325e-06	0.000646055	0.0675127	0.0699933		-0.153495	0.401761	22.9699	0.0435352	0.0475284		4.82601e-06	0.000456865	0.0477569	0.249663		0.3545	0.3545	23.6265	0.0423253	0.0671895		2.07753e-07	0.000646054	0.0675126	0.00760033		0.0525354	-0.0525354	23.2748	0.042965	0.0671897		4.11048e-07	0.000646055	0.0675127	0.0150376
						-0.354043	0.354043	23.4372	0.0426672	0.0678357		1.91325e-06	0.000646055	0.0681588	0.0699933		-0.153038	0.401767	22.9674	0.04354	0.0479853		4.82586e-06	0.000456864	0.0482137	0.249656		0.354043	0.354043	23.6264	0.0423255	0.0678356		2.11602e-07	0.000646054	0.0681586	0.00774112		0.0529922	-0.0529922	23.2746	0.0429654	0.0678357		4.11048e-07	0.000646055	0.0681588	0.0150376
						-0.353586	0.353586	23.4362	0.0426691	0.0684818		1.91325e-06	0.000646055	0.0688048	0.0699933		-0.152581	0.401773	22.9648	0.0435449	0.0484422		4.82571e-06	0.000456863	0.0486706	0.249648		0.353586	0.353586	23.6263	0.0423258	0.0684816		2.11602e-07	0.000646054	0.0688047	0.00774112		0.0534491	-0.0534491	23.2743	0.0429658	0.0684818		4.11048e-07	0.000646055	0.0688048	0.0150376
						-0.353129	0.353129	23.4351	0.042671	0.0691278		1.91325e-06	0.000646055	0.0694509	0.0699933		-0.152124	0.401778	22.9623	0.0435497	0.048899		4.82554e-06	0.000456863	0.0491274	0.24964		0.353129	0.35313	23.6262	0.042326	0.0691277		2.11602e-07	0.000646054	0.0694507	0.00774112		0.0539059	-0.0539059	23.2741	0.0429662	0.0691278		4.11048e-07	0.000646055	0.0694509	0.0150376
						-0.352672	0.352672	23.4341	0.0426729	0.0697739		1.91325e-06	0.000646055	0.0700969	0.0699933		-0.151667	0.401784	22.9597	0.0435545	0.0493559		4.82537e-06	0.000456862	0.0495843	0.249632		0.352672	0.352673	23.626	0.0423262	0.0697737		2.11602e-07	0.000646054	0.0700968	0.00774112		0.0543627	-0.0543627	23.2739	0.0429666	0.0697739		4.11048e-07	0.000646055	0.0700969	0.0150376
						-0.352216	0.352216	23.433	0.0426748	0.07042		1.91325e-06	0.000646055	0.070743	0.0699933		-0.151211	0.401789	22.9572	0.0435593	0.0498127		4.82519e-06	0.000456861	0.0500412	0.249623		0.352216	0.352216	23.6259	0.0423264	0.0704198		2.11602e-07	0.000646054	0.0707428	0.00774112		0.0548196	-0.0548196	23.2737	0.042967	0.07042		4.11048e-07	0.000646055	0.070743	0.0150376
						-0.351759	0.351759	23.432	0.0426767	0.071066		1.9419e-06	0.000646055	0.071389	0.0710412		-0.150754	0.401794	22.9546	0.0435642	0.0502696		4.98466e-06	0.00045686	0.050498	0.257873		0.351759	0.351759	23.6258	0.0423266	0.0710659		2.29833e-07	0.000646054	0.0713889	0.00840809		0.0552764	-0.0552764	23.2734	0.0429674	0.071066		4.45186e-07	0.000646055	0.071389	0.0162864
						-0.351302	0.351302	23.4309	0.0426787	0.0717121		1.9419e-06	0.000646055	0.0720351	0.0710412		-0.150297	0.4018	22.952	0.0435691	0.0507265		5.12405e-06	0.00045686	0.0509549	0.265085		0.351302	0.351302	23.6257	0.0423268	0.0717119		2.29837e-07	0.000646054	0.0720349	0.00840825		0.0557332	-0.0557332	23.2732	0.0429679	0.0717121		4.45186e-07	0.000646055	0.0720351	0.0162864
						-0.350845	0.350845	23.4298	0.0426806	0.0723581		1.9419e-06	0.000646055	0.0726811	0.0710412		-0.14984	0.401805	22.9493	0.0435743	0.0511833		5.12384e-06	0.000456859	0.0514118	0.265074		0.350845	0.350845	23.6255	0.0423271	0.072358		2.29837e-07	0.000646054	0.072681	0.00840825		0.05619	-0.05619	23.273	0.0429683	0.0723581		4.45186e-07	0.000646055	0.0726811	0.0162864
						-0.350388	0.350388	23.4288	0.0426826	0.0730042		1.9419e-06	0.000646055	0.0733272	0.0710412		-0.149383	0.40181	22.9466	0.0435794	0.0516402		5.12362e-06	0.000456858	0.0518686	0.265063		0.350388	0.350389	23.6254	0.0423273	0.073004		2.29837e-07	0.000646054	0.073327	0.00840825		0.0566469	-0.0566469	23.2727	0.0429688	0.0730042		4.45186e-07	0.000646055	0.0733272	0.0162864
						-0.349931	0.349931	23.4277	0.0426845	0.0736502		1.9419e-06	0.000646055	0.0739733	0.0710412		-0.148926	0.401815	22.9439	0.0435845	0.052097		5.12339e-06	0.000456858	0.0523255	0.265052		0.349931	0.349932	23.6253	0.0423275	0.0736501		2.29837e-07	0.000646054	0.0739731	0.00840825		0.0571037	-0.0571037	23.2725	0.0429692	0.0736502		4.45186e-07	0.000646055	0.0739733	0.0162864
						-0.349475	0.349475	23.4266	0.0426864	0.0742963		1.9419e-06	0.000646055	0.0746193	0.0710412		-0.14847	0.40182	22.9412	0.0435896	0.0525539		5.12315e-06	0.000456857	0.0527823	0.26504		0.349475	0.349475	23.6252	0.0423278	0.0742961		2.33896e-07	0.000646054	0.0746191	0.00855672		0.0575605	-0.0575605	23.2722	0.0429696	0.0742963		4.45186e-07	0.000646055	0.0746193	0.0162864
						-0.349018	0.349018	23.4256	0.0426884	0.0749423		1.9419e-06	0.000646055	0.0752654	0.0710412		-0.148013	0.401825	22.9385	0.0435948	0.0530108		5.1229e-06	0.000456856	0.0532392	0.265027		0.349018	0.349018	23.625	0.042328	0.0749422		2.37958e-07	0.000646054	0.0752652	0.00870535		0.0580174	-0.0580174	23.272	0.0429701	0.0749423		4.45186e-07	0.000646055	0.0752654	0.0162864
						-0.348561	0.348561	23.4245	0.0426903	0.0755884		1.9419e-06	0.000646055	0.0759114	0.0710412		-0.147556	0.40183	22.9358	0.0435999	0.0534676		5.12265e-06	0.000456855	0.053696	0.265015		0.348561	0.348561	23.6249	0.0423282	0.0755882		2.37958e-07	0.000646054	0.0759113	0.00870535		0.0584742	-0.0584742	23.2718	0.0429705	0.0755884		4.45186e-07	0.000646055	0.0759114	0.0162864
						-0.348104	0.348104	23.4234	0.0426923	0.0762344		1.9419e-06	0.000646055	0.0765575	0.0710412		-0.147099	0.401835	22.9331	0.043605	0.0539245		5.12239e-06	0.000456854	0.0541529	0.265002		0.348104	0.348104	23.6248	0.0423285	0.0762343		2.37958e-07	0.000646054	0.0765573	0.00870535		0.058931	-0.058931	23.2715	0.042971	0.0762344		4.45186e-07	0.000646055	0.0765575	0.0162864
						-0.347647	0.347647	23.4224	0.0426942	0.0768805		1.9419e-06	0.000646055	0.0772035	0.0710412		-0.146642	0.40184	22.9305	0.0436101	0.0543813		5.12213e-06	0.000456854	0.0546097	0.264989		0.347647	0.347648	23.6246	0.0423287	0.0768803		2.37958e-07	0.000646054	0.0772034	0.00870535		0.0593878	-0.0593878	23.2713	0.0429714	0.0768805		4.45186e-07	0.000646055	0.0772035	0.0162864
						-0.34719	0.34719	23.4213	0.0426962	0.0775266		1.9419e-06	0.000646055	0.0778496	0.0710412		-0.146185	0.401844	22.9278	0.0436153	0.0548382		5.12186e-06	0.000456853	0.0550666	0.264975		0.34719	0.347191	23.6245	0.0423289	0.0775264		2.37958e-07	0.000646054	0.0778494	0.00870535		0.0598447	-0.0598447	23.271	0.0429719	0.0775266		4.45186e-07	0.000646055	0.0778496	0.0162864
						-0.346734	0.346734	23.4202	0.0426981	0.0781726		1.96431e-06	0.000646055	0.0784956	0.0718613		-0.145729	0.401849	22.9251	0.0436204	0.055295		5.32861e-06	0.000456852	0.0555235	0.275672		0.346734	0.346734	23.6244	0.0423292	0.0781724		2.57911e-07	0.000646054	0.0784955	0.00943528		0.0603015	-0.0603015	23.2708	0.0429723	0.0781726		4.77809e-07	0.000646055	0.0784956	0.0174799
						-0.346277	0.346277	23.4192	0.0427001	0.0788187		1.96431e-06	0.000646055	0.0791417	0.0718613		-0.145272	0.401854	22.9223	0.0436257	0.0557519		5.44791e-06	0.000456851	0.0559803	0.281844		0.346277	0.346277	23.6242	0.0423294	0.0788185		2.57916e-07	0.000646054	0.0791415	0.00943546		0.0607583	-0.0607583	23.2705	0.0429728	0.0788187		4.77809e-07	0.000646055	0.0791417	0.0174799
						-0.34582	0.34582	23.4181	0.042702	0.0794647		1.96431e-06	0.000646055	0.0797877	0.0718613		-0.144815	0.401858	22.9194	0.0436312	0.0562087		5.4476e-06	0.000456851	0.0564372	0.281829		0.34582	0.34582	23.6241	0.0423297	0.0794646		2.57916e-07	0.000646054	0.0797876	0.00943546		0.0612152	-0.0612152	23.2703	0.0429733	0.0794647		4.77809e-07	0.000646055	0.0797877	0.0174799
						-0.345363	0.345363	23.417	0.042704	0.0801108		1.96431e-06	0.000646055	0.0804338	0.0718613		-0.144358	0.401862	22.9165	0.0436366	0.0566656		5.44728e-06	0.00045685	0.056894	0.281812		0.345363	0.345363	23.6239	0.04233	0.0801106		2.57916e-07	0.000646054	0.0804336	0.00943546		0.061672	-0.061672	23.27	0.0429738	0.0801108		4.77809e-07	0.000646055	0.0804338	0.0174799
						-0.344906	0.344906	23.4159	0.042706	0.0807568		1.96431e-06	0.000646055	0.0810799	0.0718613		-0.143901	0.401867	22.9137	0.043642	0.0571224		5.44696e-06	0.000456849	0.0573509	0.281796		0.344906	0.344907	23.6238	0.0423302	0.0807567		2.57916e-07	0.000646054	0.0810797	0.00943546		0.0621288	-0.0621288	23.2698	0.0429742	0.0807568		4.77809e-07	0.000646055	0.0810799	0.0174799
						-0.34445	0.34445	23.4149	0.0427079	0.0814029		1.96431e-06	0.000646055	0.0817259	0.0718613		-0.143444	0.401871	22.9108	0.0436475	0.0575793		5.44663e-06	0.000456849	0.0578077	0.281779		0.34445	0.34445	23.6236	0.0423305	0.0814027		2.62166e-07	0.000646054	0.0817257	0.00959094		0.0625857	-0.0625857	23.2695	0.0429747	0.0814029		4.77809e-07	0.000646055	0.0817259	0.0174799
						-0.343993	0.343993	23.4138	0.0427099	0.0820489		1.96431e-06	0.000646055	0.082372	0.0718613		-0.142988	0.401875	22.908	0.0436529	0.0580361		5.44629e-06	0.000456848	0.0582646	0.281763		0.343993	0.343993	23.6235	0.0423307	0.0820488		2.6642e-07	0.000646054	0.0823718	0.00974657		0.0630425	-0.0630425	23.2692	0.0429752	0.0820489		4.77809e-07	0.000646055	0.082372	0.0174799
						-0.343536	0.343536	23.4127	0.0427118	0.082695		1.96431e-06	0.000646055	0.083018	0.0718613		-0.142531	0.401879	22.9051	0.0436584	0.058493		5.44596e-06	0.000456847	0.0587214	0.281746		0.343536	0.343536	23.6234	0.042331	0.0826948		2.6642e-07	0.000646054	0.0830178	0.00974657		0.0634993	-0.0634993	23.269	0.0429757	0.082695		4.77809e-07	0.000646055	0.083018	0.0174799
						-0.343079	0.343079	23.4116	0.0427138	0.083341		1.96431e-06	0.000646055	0.0836641	0.0718613		-0.142074	0.401883	22.9022	0.0436638	0.0589498		5.44561e-06	0.000456846	0.0591782	0.281728		0.343079	0.343079	23.6232	0.0423313	0.0833409		2.6642e-07	0.000646054	0.0836639	0.00974657		0.0639561	-0.0639561	23.2687	0.0429761	0.083341		4.77809e-07	0.000646055	0.0836641	0.0174799
						-0.342622	0.342622	23.4106	0.0427158	0.0839871		1.96431e-06	0.000646055	0.0843101	0.0718613		-0.141617	0.401887	22.8994	0.0436693	0.0594067		5.44527e-06	0.000456846	0.0596351	0.281711		0.342622	0.342622	23.6231	0.0423315	0.0839869		2.6642e-07	0.000646054	0.08431	0.00974657		0.064413	-0.064413	23.2685	0.0429766	0.0839871		4.77809e-07	0.000646055	0.0843101	0.0174799
						-0.342165	0.342165	23.4095	0.0427177	0.0846332		1.96431e-06	0.000646055	0.0849562	0.0718613		-0.14116	0.401891	22.8965	0.0436747	0.0598635		5.44493e-06	0.000456845	0.0600919	0.281694		0.342165	0.342166	23.6229	0.0423318	0.084633		2.6642e-07	0.000646054	0.084956	0.00974657		0.0648698	-0.0648698	23.2682	0.0429771	0.0846332		4.77809e-07	0.000646055	0.0849562	0.0174799
						-0.341709	0.341709	23.4084	0.0427197	0.0852792		1.98014e-06	0.000646055	0.0856022	0.0724403		-0.140704	0.401895	22.8937	0.0436802	0.0603204		5.70332e-06	0.000456844	0.0605488	0.295062		0.341709	0.341709	23.6228	0.0423321	0.085279		2.88159e-07	0.000646054	0.0856021	0.0105419		0.0653266	-0.0653266	23.2679	0.0429776	0.0852792		5.08726e-07	0.000646055	0.0856022	0.0186109
						-0.341252	0.341252	23.4073	0.0427217	0.0859253		1.98014e-06	0.000646055	0.0862483	0.0724403		-0.140247	0.401898	22.8907	0.0436859	0.0607772		5.80154e-06	0.000456844	0.0610056	0.300144		0.341252	0.341252	23.6226	0.0423324	0.0859251		2.88165e-07	0.000646054	0.0862481	0.0105421		0.0657835	-0.0657835	23.2677	0.0429781	0.0859253		5.08726e-07	0.000646055	0.0862483	0.0186109
						-0.340795	0.340795	23.4062	0.0427237	0.0865713		1.98014e-06	0.000646055	0.0868943	0.0724403		-0.13979	0.401902	22.8877	0.0436917	0.061234		5.80115e-06	0.000456843	0.0614625	0.300124		0.340795	0.340795	23.6224	0.0423326	0.0865711		2.88165e-07	0.000646054	0.0868942	0.0105421		0.0662403	-0.0662403	23.2674	0.0429786	0.0865713		5.08726e-07	0.000646055	0.0868943	0.0186109
						-0.340338	0.340338	23.4051	0.0427256	0.0872174		1.98014e-06	0.000646055	0.0875404	0.0724403		-0.139333	0.401905	22.8846	0.0436975	0.0616909		5.80076e-06	0.000456843	0.0619193	0.300104		0.340338	0.340338	23.6223	0.0423329	0.0872172		2.88165e-07	0.000646054	0.0875402	0.0105421		0.0666971	-0.0666971	23.2671	0.0429791	0.0872174		5.08726e-07	0.000646055	0.0875404	0.0186109
						-0.339881	0.339881	23.4041	0.0427276	0.0878634		1.98014e-06	0.000646055	0.0881865	0.0724403		-0.138876	0.401909	22.8816	0.0437033	0.0621477		5.80037e-06	0.000456842	0.0623762	0.300084		0.339881	0.339881	23.6221	0.0423332	0.0878633		2.88165e-07	0.000646054	0.0881863	0.0105421		0.067154	-0.067154	23.2668	0.0429796	0.0878634		5.08726e-07	0.000646055	0.0881865	0.0186109
						-0.339424	0.339424	23.403	0.0427296	0.0885095		1.98014e-06	0.000646055	0.0888325	0.0724403		-0.138419	0.401912	22.8785	0.0437091	0.0626046		5.79997e-06	0.000456841	0.062833	0.300064		0.339424	0.339425	23.622	0.0423335	0.0885093		2.92577e-07	0.000646054	0.0888323	0.0107035		0.0676108	-0.0676108	23.2666	0.0429801	0.0885095		5.08726e-07	0.000646055	0.0888325	0.0186109
						-0.338968	0.338968	23.4019	0.0427316	0.0891555		1.98014e-06	0.000646055	0.0894786	0.0724403		-0.137963	0.401916	22.8755	0.0437149	0.0630614		5.79957e-06	0.000456841	0.0632898	0.300044		0.338968	0.338968	23.6218	0.0423338	0.0891554		2.96994e-07	0.000646054	0.0894784	0.0108651		0.0680676	-0.0680676	23.2663	0.0429806	0.0891555		5.08726e-07	0.000646055	0.0894786	0.0186109
						-0.338511	0.338511	23.4008	0.0427336	0.0898016		1.98014e-06	0.000646055	0.0901246	0.0724403		-0.137506	0.401919	22.8725	0.0437207	0.0635183		5.79918e-06	0.00045684	0.0637467	0.300024		0.338511	0.338511	23.6216	0.0423341	0.0898014		2.96994e-07	0.000646054	0.0901244	0.0108651		0.0685244	-0.0685244	23.266	0.0429811	0.0898016		5.08726e-07	0.000646055	0.0901246	0.0186109
						-0.338054	0.338054	23.3997	0.0427355	0.0904476		1.98014e-06	0.000646055	0.0907707	0.0724403		-0.137049	0.401922	22.8694	0.0437265	0.0639751		5.79878e-06	0.00045684	0.0642035	0.300004		0.338054	0.338054	23.6215	0.0423344	0.0904475		2.96994e-07	0.000646054	0.0907705	0.0108651		0.0689813	-0.0689813	23.2657	0.0429816	0.0904476		5.08726e-07	0.000646055	0.0907707	0.0186109
						-0.337597	0.337597	23.3986	0.0427375	0.0910937		1.98014e-06	0.000646055	0.0914167	0.0724403		-0.136592	0.401925	22.8664	0.0437323	0.0644319		5.79839e-06	0.000456839	0.0646604	0.299984		0.337597	0.337597	23.6213	0.0423347	0.0910935		2.96994e-07	0.000646054	0.0914165	0.0108651		0.0694381	-0.0694381	23.2655	0.0429822	0.0910937		5.08726e-07	0.000646055	0.0914167	0.0186109
						-0.33714	0.33714	23.3976	0.0427395	0.0917398		1.98014e-06	0.000646055	0.0920628	0.0724403		-0.136135	0.401928	22.8634	0.0437381	0.0648888		5.798e-06	0.000456839	0.0651172	0.299964		0.33714	0.337141	23.6211	0.042335	0.0917396		2.96994e-07	0.000646054	0.0920626	0.0108651		0.0698949	-0.0698949	23.2652	0.0429827	0.0917398		5.08726e-07	0.000646055	0.0920628	0.0186109
						-0.336683	0.336683	23.3965	0.0427415	0.0923858		1.98905e-06	0.000646055	0.0927088	0.0727662		-0.135678	0.401931	22.8603	0.0437439	0.0653456		6.11152e-06	0.000456838	0.065574	0.316185		0.336683	0.336684	23.621	0.0423353	0.0923856		3.20575e-07	0.000646054	0.0927087	0.0117277		0.0703518	-0.0703518	23.2649	0.0429832	0.0923858		5.37731e-07	0.000646055	0.0927088	0.0196721
						-0.336227	0.336227	23.3954	0.0427435	0.0930319		1.98905e-06	0.000646055	0.0933549	0.0727662		-0.135222	0.401934	22.8572	0.04375	0.0658025		6.18924e-06	0.000456838	0.0660309	0.320206		0.336227	0.336227	23.6208	0.0423356	0.0930317		3.20581e-07	0.000646054	0.0933547	0.011728		0.0708086	-0.0708086	23.2646	0.0429837	0.0930319		5.37731e-07	0.000646055	0.0933549	0.0196721
						-0.33577	0.33577	23.3943	0.0427455	0.0936779		1.98905e-06	0.000646055	0.0940009	0.0727662		-0.134765	0.401936	22.8539	0.0437562	0.0662593		6.18881e-06	0.000456837	0.0664877	0.320184		0.33577	0.33577	23.6206	0.0423359	0.0936777		3.20581e-07	0.000646054	0.0940008	0.011728		0.0712654	-0.0712654	23.2643	0.0429842	0.0936779		5.37731e-07	0.000646055	0.0940009	0.0196721
						-0.335313	0.335313	23.3932	0.0427475	0.094324		1.98905e-06	0.000646055	0.094647	0.0727662		-0.134308	0.401939	22.8507	0.0437624	0.0667161		6.18838e-06	0.000456837	0.0669445	0.320162		0.335313	0.335313	23.6204	0.0423362	0.0943238		3.20581e-07	0.000646054	0.0946468	0.011728		0.0717222	-0.0717222	23.264	0.0429848	0.094324		5.37731e-07	0.000646055	0.094647	0.0196721
						-0.334856	0.334856	23.3921	0.0427494	0.09497		1.98905e-06	0.000646055	0.0952931	0.0727662		-0.133851	0.401942	22.8475	0.0437685	0.067173		6.18795e-06	0.000456837	0.0674014	0.32014		0.334856	0.334856	23.6202	0.0423366	0.0949698		3.20581e-07	0.000646054	0.0952929	0.011728		0.0721791	-0.0721791	23.2638	0.0429853	0.09497		5.37731e-07	0.000646055	0.0952931	0.0196721
						-0.334399	0.334399	23.391	0.0427514	0.0956161		1.98905e-06	0.000646055	0.0959391	0.0727662		-0.133394	0.401944	22.8442	0.0437747	0.0676298		6.18752e-06	0.000456836	0.0678582	0.320118		0.334399	0.3344	23.6201	0.0423369	0.0956159		3.2512e-07	0.000646054	0.0959389	0.011894		0.0726359	-0.0726359	23.2635	0.0429859	0.0956161		5.37731e-07	0.000646055	0.0959391	0.0196721
						-0.333942	0.333942	23.3899	0.0427534	0.0962621		1.98905e-06	0.000646055	0.0965852	0.0727662		-0.132937	0.401947	22.841	0.0437809	0.0680866		6.18709e-06	0.000456836	0.0683151	0.320096		0.333942	0.333943	23.6199	0.0423372	0.096262		3.29664e-07	0.000646054	0.096585	0.0120603		0.0730927	-0.0730927	23.2632	0.0429864	0.0962621		5.37731e-07	0.000646055	0.0965852	0.0196721
						-0.333486	0.333486	23.3889	0.0427554	0.0969082		1.98905e-06	0.000646055	0.0972312	0.0727662		-0.132481	0.401949	22.8378	0.0437871	0.0685435		6.18667e-06	0.000456836	0.0687719	0.320075		0.333486	0.333486	23.6197	0.0423375	0.096908		3.29664e-07	0.000646054	0.097231	0.0120603		0.0735496	-0.0735496	23.2629	0.0429869	0.0969082		5.37731e-07	0.000646055	0.0972312	0.0196721
						-0.333029	0.333029	23.3878	0.0427574	0.0975542		1.98905e-06	0.000646055	0.0978773	0.0727662		-0.132024	0.401951	22.8345	0.0437933	0.0690003		6.18626e-06	0.000456835	0.0692287	0.320053		0.333029	0.333029	23.6195	0.0423379	0.0975541		3.29664e-07	0.000646054	0.0978771	0.0120603		0.0740064	-0.0740064	23.2626	0.0429875	0.0975542		5.37731e-07	0.000646055	0.0978773	0.0196721
						-0.332572	0.332572	23.3867	0.0427594	0.0982003		1.98905e-06	0.000646055	0.0985233	0.0727662		-0.131567	0.401954	22.8313	0.0437995	0.0694571		6.18584e-06	0.000456835	0.0696856	0.320032		0.332572	0.332572	23.6193	0.0423382	0.0982001		3.29664e-07	0.000646054	0.0985231	0.0120603		0.0744632	-0.0744632	23.2623	0.042988	0.0982003		5.37731e-07	0.000646055	0.0985233	0.0196721
						-0.332115	0.332115	23.3856	0.0427614	0.0988464		1.98905e-06	0.000646055	0.0991694	0.0727662		-0.13111	0.401956	22.8281	0.0438057	0.069914		6.18544e-06	0.000456835	0.0701424	0.320011		0.332115	0.332115	23.6191	0.0423385	0.0988462		3.29664e-07	0.000646054	0.0991692	0.0120603		0.0749201	-0.0749201	23.262	0.0429885	0.0988464		5.37731e-07	0.000646055	0.0991694	0.0196721
						-0.331658	0.331658	23.3845	0.0427634	0.0994924		1.99076e-06	0.000646055	0.0998154	0.0728289		-0.130653	0.401958	22.8249	0.0438119	0.0703708		6.55722e-06	0.000456834	0.0705992	0.339246		0.331658	0.331659	23.619	0.0423389	0.0994922		3.55131e-07	0.000646054	0.0998152	0.0129919		0.0753769	-0.0753769	23.2617	0.0429891	0.0994924		5.64607e-07	0.000646055	0.0998154	0.0206553
						-0.331201	0.331201	23.3834	0.0427654	0.100138		1.99076e-06	0.000646055	0.100461	0.0728289		-0.130196	0.40196	22.8215	0.0438184	0.0708277		6.61626e-06	0.000456834	0.0710561	0.342301		0.331201	0.331202	23.6188	0.0423392	0.100138		3.55138e-07	0.000646054	0.100461	0.0129922		0.0758337	-0.0758337	23.2614	0.0429896	0.100138		5.64607e-07	0.000646055	0.100461	0.0206553
						-0.330745	0.330745	23.3823	0.0427673	0.100785		1.99076e-06	0.000646055	0.101108	0.0728289		-0.12974	0.401962	22.818	0.043825	0.0712845		6.61582e-06	0.000456834	0.0715129	0.342278		0.330745	0.330745	23.6186	0.0423396	0.100784		3.55138e-07	0.000646054	0.101107	0.0129922		0.0762905	-0.0762905	23.2611	0.0429902	0.100785		5.64607e-07	0.000646055	0.101108	0.0206553
						-0.330288	0.330288	23.3812	0.0427693	0.101431		1.99076e-06	0.000646055	0.101754	0.0728289		-0.129283	0.401964	22.8146	0.0438316	0.0717413		6.61538e-06	0.000456833	0.0719697	0.342256		0.330288	0.330288	23.6184	0.0423399	0.10143		3.55138e-07	0.000646054	0.101753	0.0129922		0.0767474	-0.0767474	23.2608	0.0429908	0.101431		5.64607e-07	0.000646055	0.101754	0.0206553
						-0.329831	0.329831	23.3801	0.0427713	0.102077		1.99076e-06	0.000646055	0.1024	0.0728289		-0.128826	0.401966	22.8111	0.0438383	0.0721982		6.61495e-06	0.000456833	0.0724266	0.342234		0.329831	0.329831	23.6182	0.0423403	0.102076		3.55138e-07	0.000646054	0.102399	0.0129922		0.0772042	-0.0772042	23.2605	0.0429913	0.102077		5.64607e-07	0.000646055	0.1024	0.0206553
						-0.329374	0.329374	23.3791	0.0427733	0.102723		1.99076e-06	0.000646055	0.103046	0.0728289		-0.128369	0.401968	22.8077	0.0438449	0.072655		6.61452e-06	0.000456833	0.0728834	0.342212		0.329374	0.329374	23.618	0.0423406	0.102722		3.5976e-07	0.000646054	0.103046	0.0131613		0.077661	-0.077661	23.2602	0.0429919	0.102723		5.64607e-07	0.000646055	0.103046	0.0206553
						-0.328917	0.328917	23.378	0.0427753	0.103369		1.99076e-06	0.000646055	0.103692	0.0728289		-0.127912	0.401969	22.8042	0.0438515	0.0731118		6.61411e-06	0.000456833	0.0733402	0.34219		0.328917	0.328918	23.6178	0.042341	0.103369		3.64388e-07	0.000646054	0.103692	0.0133306		0.0781179	-0.0781179	23.2599	0.0429925	0.103369		5.64607e-07	0.000646055	0.103692	0.0206553
						-0.32846	0.32846	23.3769	0.0427773	0.104015		1.99076e-06	0.000646055	0.104338	0.0728289		-0.127455	0.401971	22.8008	0.0438581	0.0735687		6.61369e-06	0.000456833	0.0737971	0.342169		0.32846	0.328461	23.6176	0.0423414	0.104015		3.64388e-07	0.000646054	0.104338	0.0133306		0.0785747	-0.0785747	23.2596	0.042993	0.104015		5.64607e-07	0.000646055	0.104338	0.0206553
						-0.328004	0.328004	23.3758	0.0427793	0.104661		1.99076e-06	0.000646055	0.104984	0.0728289		-0.126999	0.401973	22.7974	0.0438647	0.0740255		6.61329e-06	0.000456832	0.0742539	0.342148		0.328004	0.328004	23.6174	0.0423417	0.104661		3.64388e-07	0.000646054	0.104984	0.0133306		0.0790315	-0.0790315	23.2593	0.0429936	0.104661		5.64607e-07	0.000646055	0.104984	0.0206553
						-0.327547	0.327547	23.3747	0.0427813	0.105307		1.99076e-06	0.000646055	0.10563	0.0728289		-0.126542	0.401974	22.7939	0.0438713	0.0744823		6.61289e-06	0.000456832	0.0747107	0.342128		0.327547	0.327547	23.6172	0.0423421	0.105307		3.64388e-07	0.000646054	0.10563	0.0133306		0.0794884	-0.0794883	23.259	0.0429942	0.105307		5.64607e-07	0.000646055	0.10563	0.0206553
						-0.32709	0.32709	23.3736	0.0427833	0.105953		1.99076e-06	0.000646055	0.106276	0.0728289		-0.126085	0.401976	22.7905	0.0438779	0.0749391		6.6125e-06	0.000456832	0.0751676	0.342108		0.32709	0.32709	23.617	0.0423425	0.105953		3.64388e-07	0.000646054	0.106276	0.0133306		0.0799452	-0.0799452	23.2587	0.0429947	0.105953		5.64607e-07	0.000646055	0.106276	0.0206553
						-0.326633	0.326633	23.3725	0.0427853	0.106599		1.98505e-06	0.000646055	0.106922	0.0726201		-0.125628	0.401977	22.7871	0.0438846	0.075396		7.04588e-06	0.000456832	0.0756244	0.36453		0.326633	0.326633	23.6168	0.0423428	0.106599		3.91771e-07	0.000646054	0.106922	0.0143324		0.080402	-0.080402	23.2584	0.0429953	0.106599		5.89124e-07	0.000646055	0.106922	0.0215522
						-0.326176	0.326176	23.3715	0.0427872	0.107245		1.98505e-06	0.000646055	0.107568	0.0726201		-0.125171	0.401979	22.7834	0.0438916	0.0758528		7.08889e-06	0.000456832	0.0760812	0.366755		0.326176	0.326177	23.6165	0.0423432	0.107245		3.9178e-07	0.000646054	0.107568	0.0143327		0.0808588	-0.0808588	23.258	0.0429959	0.107245		5.89124e-07	0.000646055	0.107568	0.0215522
						-0.32572	0.32572	23.3704	0.0427892	0.107891		1.98505e-06	0.000646055	0.108214	0.0726201		-0.124714	0.40198	22.7797	0.0438987	0.0763096		7.08847e-06	0.000456832	0.0765381	0.366733		0.32572	0.32572	23.6163	0.0423436	0.107891		3.9178e-07	0.000646054	0.108214	0.0143327		0.0813157	-0.0813157	23.2577	0.0429965	0.107891		5.89124e-07	0.000646055	0.108214	0.0215522
						-0.325263	0.325263	23.3693	0.0427912	0.108537		1.98505e-06	0.000646055	0.10886	0.0726201		-0.124258	0.401982	22.776	0.0439058	0.0767665		7.08806e-06	0.000456831	0.0769949	0.366712		0.325263	0.325263	23.6161	0.042344	0.108537		3.9178e-07	0.000646054	0.10886	0.0143327		0.0817725	-0.0817725	23.2574	0.0429971	0.108537		5.89124e-07	0.000646055	0.10886	0.0215522
						-0.324806	0.324806	23.3682	0.0427932	0.109183		1.98505e-06	0.000646055	0.109506	0.0726201		-0.123801	0.401983	22.7724	0.0439129	0.0772233		7.08766e-06	0.000456831	0.0774517	0.366692		0.324806	0.324806	23.6159	0.0423444	0.109183		3.9178e-07	0.000646054	0.109506	0.0143327		0.0822293	-0.0822293	23.2571	0.0429977	0.109183		5.89124e-07	0.000646055	0.109506	0.0215522
						-0.324349	0.324349	23.3671	0.0427952	0.109829		1.98505e-06	0.000646055	0.110152	0.0726201		-0.123344	0.401984	22.7687	0.04392	0.0776801		7.08727e-06	0.000456831	0.0779086	0.366672		0.324349	0.324349	23.6157	0.0423448	0.109829		3.96435e-07	0.000646054	0.110152	0.014503		0.0826862	-0.0826862	23.2568	0.0429982	0.109829		5.89124e-07	0.000646055	0.110152	0.0215522
						-0.323892	0.323892	23.366	0.0427972	0.110475		1.98505e-06	0.000646055	0.110798	0.0726201		-0.122887	0.401985	22.765	0.043927	0.078137		7.08689e-06	0.000456831	0.0783654	0.366652		0.323892	0.323892	23.6154	0.0423452	0.110475		4.01096e-07	0.000646054	0.110798	0.0146735		0.083143	-0.083143	23.2564	0.0429988	0.110475		5.89124e-07	0.000646055	0.110798	0.0215522
						-0.323435	0.323435	23.3649	0.0427992	0.111121		1.98505e-06	0.000646055	0.111444	0.0726201		-0.12243	0.401986	22.7613	0.0439341	0.0785938		7.08652e-06	0.000456831	0.0788222	0.366633		0.323435	0.323436	23.6152	0.0423456	0.111121		4.01096e-07	0.000646054	0.111444	0.0146735		0.0835998	-0.0835998	23.2561	0.0429994	0.111121		5.89124e-07	0.000646055	0.111444	0.0215522
						-0.322979	0.322979	23.3639	0.0428011	0.111767		1.98505e-06	0.000646055	0.11209	0.0726201		-0.121974	0.401987	22.7577	0.0439412	0.0790506		7.08615e-06	0.000456831	0.079279	0.366614		0.322979	0.322979	23.615	0.042346	0.111767		4.01096e-07	0.000646054	0.11209	0.0146735		0.0840566	-0.0840566	23.2558	0.043	0.111767		5.89124e-07	0.000646055	0.11209	0.0215522
						-0.322522	0.322522	23.3628	0.0428031	0.112414		1.98505e-06	0.000646055	0.112737	0.0726201		-0.121517	0.401989	22.754	0.0439483	0.0795075		7.0858e-06	0.000456831	0.0797359	0.366596		0.322522	0.322522	23.6148	0.0423464	0.112413		4.01096e-07	0.000646054	0.112736	0.0146735		0.0845135	-0.0845135	23.2555	0.0430006	0.112414		5.89124e-07	0.000646055	0.112737	0.0215522
						-0.322065	0.322065	23.3617	0.0428051	0.11306		1.98505e-06	0.000646055	0.113383	0.0726201		-0.12106	0.40199	22.7503	0.0439554	0.0799643		7.08545e-06	0.000456831	0.0801927	0.366578		0.322065	0.322065	23.6145	0.0423468	0.113059		4.01096e-07	0.000646054	0.113382	0.0146735		0.0849703	-0.0849703	23.2552	0.0430012	0.11306		5.89124e-07	0.000646055	0.113383	0.0215522
						-0.321608	0.321608	23.3606	0.0428071	0.113706		1.97175e-06	0.000646055	0.114029	0.0721333		-0.120603	0.401991	22.7467	0.0439625	0.0804211		7.58459e-06	0.000456831	0.0806495	0.392402		0.321608	0.321608	23.6143	0.0423472	0.113705		4.30413e-07	0.000646054	0.114028	0.015746		0.0854271	-0.0854271	23.2549	0.0430018	0.113706		6.11039e-07	0.000646055	0.114029	0.0223539
						-0.321151	0.321151	23.3595	0.0428091	0.114352		1.97175e-06	0.000646055	0.114675	0.0721333		-0.120146	0.401991	22.7427	0.0439701	0.080878		7.6146e-06	0.00045683	0.0811064	0.393954		0.321151	0.321152	23.6141	0.0423476	0.114351		4.30422e-07	0.000646054	0.114674	0.0157464		0.085884	-0.085884	23.2545	0.0430024	0.114352		6.11039e-07	0.000646055	0.114675	0.0223539
						-0.320694	0.320694	23.3585	0.042811	0.114998		1.97175e-06	0.000646055	0.115321	0.0721333		-0.119689	0.401992	22.7388	0.0439777	0.0813348		7.61423e-06	0.00045683	0.0815632	0.393936		0.320694	0.320695	23.6138	0.042348	0.114998		4.30422e-07	0.000646054	0.115321	0.0157464		0.0863408	-0.0863408	23.2542	0.043003	0.114998		6.11039e-07	0.000646055	0.115321	0.0223539
						-0.320238	0.320238	23.3574	0.042813	0.115644		1.97175e-06	0.000646055	0.115967	0.0721333		-0.119233	0.401993	22.7349	0.0439853	0.0817916		7.61388e-06	0.00045683	0.08202	0.393917		0.320238	0.320238	23.6136	0.0423485	0.115644		4.30422e-07	0.000646054	0.115967	0.0157464		0.0867976	-0.0867976	23.2539	0.0430036	0.115644		6.11039e-07	0.000646055	0.115967	0.0223539
						-0.319781	0.319781	23.3563	0.042815	0.11629		1.97175e-06	0.000646055	0.116613	0.0721333		-0.118776	0.401994	22.7309	0.0439929	0.0822484		7.61354e-06	0.00045683	0.0824769	0.393899		0.319781	0.319781	23.6134	0.0423489	0.11629		4.30422e-07	0.000646054	0.116613	0.0157464		0.0872545	-0.0872545	23.2535	0.0430042	0.11629		6.11039e-07	0.000646055	0.116613	0.0223539
						-0.319324	0.319324	23.3552	0.042817	0.116936		1.97175e-06	0.000646055	0.117259	0.0721333		-0.118319	0.401995	22.727	0.0440005	0.0827053		7.6132e-06	0.00045683	0.0829337	0.393882		0.319324	0.319324	23.6131	0.0423493	0.116936		4.35053e-07	0.000646054	0.117259	0.0159158		0.0877113	-0.0877113	23.2532	0.0430048	0.116936		6.11039e-07	0.000646055	0.117259	0.0223539
						-0.318867	0.318867	23.3542	0.0428189	0.117582		1.97175e-06	0.000646055	0.117905	0.0721333		-0.117862	0.401996	22.7231	0.0440081	0.0831621		7.61287e-06	0.00045683	0.0833905	0.393865		0.318867	0.318867	23.6129	0.0423498	0.117582		4.3969e-07	0.000646054	0.117905	0.0160854		0.0881681	-0.0881681	23.2529	0.0430054	0.117582		6.11039e-07	0.000646055	0.117905	0.0223539
						-0.31841	0.31841	23.3531	0.0428209	0.118228		1.97175e-06	0.000646055	0.118551	0.0721333		-0.117405	0.401996	22.7191	0.0440157	0.0836189		7.61256e-06	0.00045683	0.0838474	0.393849		0.31841	0.318411	23.6126	0.0423502	0.118228		4.3969e-07	0.000646054	0.118551	0.0160854		0.0886249	-0.0886249	23.2525	0.0430061	0.118228		6.11039e-07	0.000646055	0.118551	0.0223539
						-0.317953	0.317953	23.352	0.0428229	0.118874		1.97175e-06	0.000646055	0.119197	0.0721333		-0.116948	0.401997	22.7152	0.0440234	0.0840758		7.61225e-06	0.00045683	0.0843042	0.393833		0.317953	0.317954	23.6124	0.0423506	0.118874		4.3969e-07	0.000646054	0.119197	0.0160854		0.0890818	-0.0890818	23.2522	0.0430067	0.118874		6.11039e-07	0.000646055	0.119197	0.0223539
						-0.317497	0.317497	23.3509	0.0428248	0.11952		1.97175e-06	0.000646055	0.119843	0.0721333		-0.116492	0.401998	22.7113	0.044031	0.0845326		7.61195e-06	0.00045683	0.084761	0.393818		0.317497	0.317497	23.6121	0.0423511	0.11952		4.3969e-07	0.000646054	0.119843	0.0160854		0.0895386	-0.0895386	23.2519	0.0430073	0.11952		6.11039e-07	0.000646055	0.119843	0.0223539
						-0.31704	0.31704	23.3499	0.0428268	0.120166		1.97175e-06	0.000646055	0.120489	0.0721333		-0.116035	0.401998	22.7074	0.0440386	0.0849894		7.61167e-06	0.00045683	0.0852178	0.393803		0.31704	0.31704	23.6119	0.0423515	0.120166		4.3969e-07	0.000646054	0.120489	0.0160854		0.0899954	-0.0899954	23.2515	0.0430079	0.120166		6.11039e-07	0.000646055	0.120489	0.0223539
						-0.316583	0.316583	23.3488	0.0428288	0.120812		1.95073e-06	0.000646055	0.121135	0.0713644		-0.115578	0.401999	22.7034	0.0440462	0.0854463		8.18199e-06	0.00045683	0.0856747	0.42331		0.316583	0.316583	23.6117	0.042352	0.120812		4.70942e-07	0.000646054	0.121135	0.0172287		0.0904523	-0.0904523	23.2512	0.0430085	0.120812		6.30101e-07	0.000646055	0.121135	0.0230513
						-0.316126	0.316126	23.3477	0.0428307	0.121458		1.95073e-06	0.000646055	0.121781	0.0713644		-0.115121	0.402	22.6992	0.0440544	0.0859031		8.20203e-06	0.00045683	0.0861315	0.424346		0.316126	0.316126	23.6114	0.0423524	0.121458		4.70953e-07	0.000646054	0.121781	0.0172291		0.0909091	-0.0909091	23.2509	0.0430091	0.121458		6.30101e-07	0.000646055	0.121781	0.0230513
						-0.315669	0.315669	23.3467	0.0428327	0.122104		1.95073e-06	0.000646055	0.122427	0.0713644		-0.114664	0.402	22.695	0.0440626	0.0863599		8.20173e-06	0.00045683	0.0865883	0.424331		0.315669	0.31567	23.6111	0.0423529	0.122104		4.70953e-07	0.000646054	0.122427	0.0172291		0.0913659	-0.0913659	23.2505	0.0430098	0.122104		6.30101e-07	0.000646055	0.122427	0.0230513
						-0.315212	0.315212	23.3456	0.0428346	0.12275		1.95073e-06	0.000646055	0.123073	0.0713644		-0.114207	0.402001	22.6908	0.0440708	0.0868167		8.20144e-06	0.00045683	0.0870452	0.424316		0.315212	0.315213	23.6109	0.0423534	0.12275		4.70953e-07	0.000646054	0.123073	0.0172291		0.0918228	-0.0918227	23.2502	0.0430104	0.12275		6.30101e-07	0.000646055	0.123073	0.0230513
						-0.314756	0.314756	23.3445	0.0428366	0.123396		1.95073e-06	0.000646055	0.123719	0.0713644		-0.113751	0.402001	22.6866	0.044079	0.0872736		8.20116e-06	0.00045683	0.087502	0.424302		0.314756	0.314756	23.6106	0.0423538	0.123396		4.70953e-07	0.000646054	0.123719	0.0172291		0.0922796	-0.0922796	23.2499	0.043011	0.123396		6.30101e-07	0.000646055	0.123719	0.0230513
						-0.314299	0.314299	23.3435	0.0428385	0.124042		1.95073e-06	0.000646055	0.124366	0.0713644		-0.113294	0.402002	22.6823	0.0440872	0.0877304		8.20089e-06	0.00045683	0.0879588	0.424288		0.314299	0.314299	23.6103	0.0423543	0.124042		4.75494e-07	0.000646054	0.124365	0.0173952		0.0927364	-0.0927364	23.2495	0.0430116	0.124042		6.30101e-07	0.000646055	0.124366	0.0230513
						-0.313842	0.313842	23.3424	0.0428405	0.124689		1.95073e-06	0.000646055	0.125012	0.0713644		-0.112837	0.402002	22.6781	0.0440954	0.0881872		8.20063e-06	0.00045683	0.0884157	0.424274		0.313842	0.313842	23.6101	0.0423548	0.124688		4.80042e-07	0.000646054	0.125011	0.0175616		0.0931932	-0.0931932	23.2492	0.0430123	0.124689		6.30101e-07	0.000646055	0.125012	0.0230513
						-0.313385	0.313385	23.3413	0.0428424	0.125335		1.95073e-06	0.000646055	0.125658	0.0713644		-0.11238	0.402003	22.6739	0.0441036	0.0886441		8.20038e-06	0.00045683	0.0888725	0.424261		0.313385	0.313385	23.6098	0.0423553	0.125334		4.80042e-07	0.000646054	0.125657	0.0175616		0.0936501	-0.0936501	23.2488	0.0430129	0.125335		6.30101e-07	0.000646055	0.125658	0.0230513
						-0.312928	0.312928	23.3403	0.0428444	0.125981		1.95073e-06	0.000646055	0.126304	0.0713644		-0.111923	0.402003	22.6697	0.0441118	0.0891009		8.20014e-06	0.00045683	0.0893293	0.424249		0.312928	0.312929	23.6095	0.0423558	0.12598		4.80042e-07	0.000646054	0.126303	0.0175616		0.0941069	-0.0941069	23.2485	0.0430135	0.125981		6.30101e-07	0.000646055	0.126304	0.0230513
						-0.312471	0.312471	23.3392	0.0428463	0.126627		1.95073e-06	0.000646055	0.12695	0.0713644		-0.111466	0.402003	22.6655	0.04412	0.0895577		8.19991e-06	0.00045683	0.0897861	0.424237		0.312471	0.312472	23.6093	0.0423562	0.126626		4.80042e-07	0.000646054	0.12695	0.0175616		0.0945637	-0.0945637	23.2482	0.0430142	0.126627		6.30101e-07	0.000646055	0.12695	0.0230513
						-0.312015	0.312015	23.3382	0.0428483	0.127273		1.95073e-06	0.000646055	0.127596	0.0713644		-0.11101	0.402004	22.6613	0.0441282	0.0900146		8.19968e-06	0.00045683	0.090243	0.424225		0.312015	0.312015	23.609	0.0423567	0.127273		4.80042e-07	0.000646054	0.127596	0.0175616		0.0950206	-0.0950206	23.2478	0.0430148	0.127273		6.30101e-07	0.000646055	0.127596	0.0230513
						-0.311558	0.311558	23.3371	0.0428502	0.127919		1.92195e-06	0.000646055	0.128242	0.0703117		-0.110553	0.402004	22.657	0.0441364	0.0904714		8.84783e-06	0.00045683	0.0906998	0.457759		0.311558	0.311558	23.6087	0.0423572	0.127919		5.13216e-07	0.000646054	0.128242	0.0187752		0.0954774	-0.0954774	23.2475	0.0430154	0.127919		6.46048e-07	0.000646055	0.128242	0.0236347
						-0.311101	0.311101	23.336	0.0428522	0.128565		1.92195e-06	0.000646055	0.128888	0.0703117		-0.110096	0.402004	22.6525	0.0441452	0.0909282		8.86061e-06	0.00045683	0.0911566	0.458419		0.311101	0.311101	23.6085	0.0423577	0.128565		5.13227e-07	0.000646054	0.128888	0.0187757		0.0959342	-0.0959342	23.2471	0.0430161	0.128565		6.46048e-07	0.000646055	0.128888	0.0236347
						-0.310644	0.310644	23.335	0.0428541	0.129211		1.92195e-06	0.000646055	0.129534	0.0703117		-0.109639	0.402005	22.648	0.0441541	0.091385		8.86038e-06	0.00045683	0.0916135	0.458408		0.310644	0.310644	23.6082	0.0423582	0.129211		5.13227e-07	0.000646054	0.129534	0.0187757		0.096391	-0.096391	23.2468	0.0430167	0.129211		6.46048e-07	0.000646055	0.129534	0.0236347
						-0.310187	0.310187	23.334	0.042856	0.129857		1.92195e-06	0.000646055	0.13018	0.0703117		-0.109182	0.402005	22.6434	0.0441629	0.0918419		8.86016e-06	0.00045683	0.0920703	0.458396		0.310187	0.310188	23.6079	0.0423587	0.129857		5.13227e-07	0.000646054	0.13018	0.0187757		0.0968479	-0.0968479	23.2464	0.0430174	0.129857		6.46048e-07	0.000646055	0.13018	0.0236347
						-0.30973	0.30973	23.3329	0.0428579	0.130503		1.92195e-06	0.000646055	0.130826	0.0703117		-0.108725	0.402005	22.6389	0.0441718	0.0922987		8.85995e-06	0.00045683	0.0925271	0.458385		0.30973	0.309731	23.6076	0.0423592	0.130503		5.13227e-07	0.000646054	0.130826	0.0187757		0.0973047	-0.0973047	23.2461	0.043018	0.130503		6.46048e-07	0.000646055	0.130826	0.0236347
						-0.309274	0.309274	23.3319	0.0428599	0.131149		1.92195e-06	0.000646055	0.131472	0.0703117		-0.108269	0.402006	22.6343	0.0441807	0.0927555		8.85975e-06	0.00045683	0.0929839	0.458375		0.309274	0.309274	23.6073	0.0423598	0.131149		5.17608e-07	0.000646054	0.131472	0.0189359		0.0977615	-0.0977615	23.2457	0.0430187	0.131149		6.46048e-07	0.000646055	0.131472	0.0236347
						-0.308817	0.308817	23.3308	0.0428618	0.131795		1.92195e-06	0.000646055	0.132118	0.0703117		-0.107812	0.402006	22.6298	0.0441895	0.0932124		8.85955e-06	0.00045683	0.0934408	0.458365		0.308817	0.308817	23.607	0.0423603	0.131795		5.21996e-07	0.000646054	0.132118	0.0190964		0.0982184	-0.0982184	23.2454	0.0430193	0.131795		6.46048e-07	0.000646055	0.132118	0.0236347
						-0.30836	0.30836	23.3298	0.0428637	0.132441		1.92195e-06	0.000646055	0.132764	0.0703117		-0.107355	0.402006	22.6253	0.0441984	0.0936692		8.85937e-06	0.00045683	0.0938976	0.458355		0.30836	0.30836	23.6067	0.0423608	0.132441		5.21996e-07	0.000646054	0.132764	0.0190964		0.0986752	-0.0986752	23.245	0.04302	0.132441		6.46048e-07	0.000646055	0.132764	0.0236347
						-0.307903	0.307903	23.3287	0.0428656	0.133087		1.92195e-06	0.000646055	0.13341	0.0703117		-0.106898	0.402006	22.6207	0.0442072	0.094126		8.85919e-06	0.00045683	0.0943544	0.458346		0.307903	0.307903	23.6064	0.0423613	0.133087		5.21996e-07	0.000646054	0.13341	0.0190964		0.099132	-0.099132	23.2447	0.0430206	0.133087		6.46048e-07	0.000646055	0.13341	0.0236347
						-0.307446	0.307446	23.3277	0.0428675	0.133733		1.92195e-06	0.000646055	0.134056	0.0703117		-0.106441	0.402007	22.6162	0.0442161	0.0945829		8.85902e-06	0.00045683	0.0948113	0.458337		0.307446	0.307447	23.6062	0.0423618	0.133733		5.21996e-07	0.000646054	0.134056	0.0190964		0.0995889	-0.0995889	23.2443	0.0430212	0.133733		6.46048e-07	0.000646055	0.134056	0.0236347
						-0.306989	0.306989	23.3266	0.0428695	0.134379		1.92195e-06	0.000646055	0.134702	0.0703117		-0.105984	0.402007	22.6117	0.044225	0.0950397		8.85885e-06	0.00045683	0.0952681	0.458329		0.306989	0.30699	23.6059	0.0423624	0.134379		5.21996e-07	0.000646054	0.134702	0.0190964		0.100046	-0.100046	23.244	0.0430219	0.134379		6.46048e-07	0.000646055	0.134702	0.0236347
						-0.306533	0.306533	23.3256	0.0428714	0.135025		1.88543e-06	0.000646055	0.135348	0.0689756		-0.105528	0.402007	22.6071	0.0442338	0.0954965		9.59174e-06	0.00045683	0.0957249	0.496246		0.306533	0.306533	23.6056	0.0423629	0.135025		5.57059e-07	0.000646054	0.135348	0.0203792		0.100503	-0.100503	23.2436	0.0430225	0.135025		6.58611e-07	0.000646055	0.135348	0.0240943
						-0.306076	0.306076	23.3246	0.0428733	0.135671		1.88543e-06	0.000646055	0.135994	0.0689756		-0.105071	0.402007	22.6022	0.0442434	0.0959533		9.5995e-06	0.00045683	0.0961818	0.496647		0.306076	0.306076	23.6053	0.0423634	0.135671		5.57072e-07	0.000646053	0.135994	0.0203796		0.100959	-0.100959	23.2433	0.0430232	0.135671		6.58611e-07	0.000646055	0.135994	0.0240943
						-0.305619	0.305619	23.3235	0.0428752	0.136318		1.88543e-06	0.000646055	0.136641	0.0689756		-0.104614	0.402007	22.5973	0.044253	0.0964102		9.59934e-06	0.00045683	0.0966386	0.496639		0.305619	0.305619	23.6049	0.042364	0.136317		5.57072e-07	0.000646053	0.13664	0.0203796		0.101416	-0.101416	23.2429	0.0430239	0.136318		6.58611e-07	0.000646055	0.136641	0.0240943
						-0.305162	0.305162	23.3225	0.042877	0.136964		1.88543e-06	0.000646055	0.137287	0.0689756		-0.104157	0.402008	22.5924	0.0442626	0.096867		9.59918e-06	0.00045683	0.0970954	0.496631		0.305162	0.305163	23.6046	0.0423646	0.136963		5.57072e-07	0.000646053	0.137286	0.0203796		0.101873	-0.101873	23.2426	0.0430245	0.136964		6.58611e-07	0.000646055	0.137287	0.0240943
						-0.304705	0.304705	23.3215	0.0428789	0.13761		1.88543e-06	0.000646055	0.137933	0.0689756		-0.1037	0.402008	22.5875	0.0442722	0.0973238		9.59903e-06	0.00045683	0.0975522	0.496623		0.304705	0.304706	23.6043	0.0423651	0.137609		5.57072e-07	0.000646053	0.137932	0.0203796		0.10233	-0.10233	23.2422	0.0430252	0.13761		6.58611e-07	0.000646055	0.137933	0.0240943
						-0.304249	0.304249	23.3205	0.0428808	0.138256		1.88543e-06	0.000646055	0.138579	0.0689756		-0.103243	0.402008	22.5826	0.0442818	0.0977807		9.59889e-06	0.00045683	0.0980091	0.496616		0.304249	0.304249	23.604	0.0423657	0.138255		5.61215e-07	0.000646054	0.138578	0.0205312		0.102787	-0.102787	23.2419	0.0430258	0.138256		6.58611e-07	0.000646055	0.138579	0.0240943
						-0.303792	0.303792	23.3194	0.0428827	0.138902		1.88543e-06	0.000646055	0.139225	0.0689756		-0.102787	0.402008	22.5777	0.0442914	0.0982375		9.59875e-06	0.00045683	0.0984659	0.496609		0.303792	0.303792	23.6037	0.0423662	0.138901		5.65365e-07	0.000646054	0.139225	0.020683		0.103243	-0.103243	23.2415	0.0430265	0.138902		6.58611e-07	0.000646055	0.139225	0.0240943
						-0.303335	0.303335	23.3184	0.0428846	0.139548		1.88543e-06	0.000646055	0.139871	0.0689756		-0.10233	0.402008	22.5728	0.044301	0.0986943		9.59862e-06	0.00045683	0.0989227	0.496602		0.303335	0.303335	23.6034	0.0423668	0.139548		5.65365e-07	0.000646054	0.139871	0.020683		0.1037	-0.1037	23.2411	0.0430271	0.139548		6.58611e-07	0.000646055	0.139871	0.0240943
						-0.302878	0.302878	23.3174	0.0428865	0.140194		1.88543e-06	0.000646055	0.140517	0.0689756		-0.101873	0.402008	22.568	0.0443106	0.0991511		9.5985e-06	0.00045683	0.0993796	0.496596		0.302878	0.302878	23.6031	0.0423674	0.140194		5.65365e-07	0.000646054	0.140517	0.020683		0.104157	-0.104157	23.2408	0.0430278	0.140194		6.58611e-07	0.000646055	0.140517	0.0240943
						-0.302421	0.302421	23.3164	0.0428884	0.14084		1.88543e-06	0.000646055	0.141163	0.0689756		-0.101416	0.402008	22.5631	0.0443202	0.099608		9.59838e-06	0.00045683	0.0998364	0.496589		0.302421	0.302422	23.6028	0.0423679	0.14084		5.65365e-07	0.000646054	0.141163	0.020683		0.104614	-0.104614	23.2404	0.0430285	0.14084		6.58611e-07	0.000646055	0.141163	0.0240943
						-0.301964	0.301964	23.3153	0.0428902	0.141486		1.88543e-06	0.000646055	0.141809	0.0689756		-0.100959	0.402008	22.5582	0.0443298	0.100065		9.59827e-06	0.00045683	0.100293	0.496584		0.301964	0.301965	23.6024	0.0423685	0.141486		5.65365e-07	0.000646054	0.141809	0.020683		0.105071	-0.105071	23.2401	0.0430291	0.141486		6.58611e-07	0.000646055	0.141809	0.0240943
						-0.301508	0.301508	23.3143	0.0428921	0.142132		1.84126e-06	0.000646055	0.142455	0.0673595		-0.100503	0.402009	22.5533	0.0443394	0.100522		1.04208e-05	0.00045683	0.10075	0.539137		0.301508	0.301508	23.6021	0.0423691	0.142132		6.02269e-07	0.000646054	0.142455	0.0220331		0.105528	-0.105528	23.2397	0.0430298	0.142132		6.67515e-07	0.000646055	0.142455	0.02442
						-0.301051	0.301051	23.3133	0.042894	0.142778		1.84126e-06	0.000646055	0.143101	0.0673595		-0.100046	0.402009	22.548	0.0443498	0.100978		1.04252e-05	0.00045683	0.101207	0.539368		0.301051	0.301051	23.6018	0.0423697	0.142778		6.02283e-07	0.000646053	0.143101	0.0220336		0.105984	-0.105984	23.2394	0.0430304	0.142778		6.67515e-07	0.000646055	0.143101	0.02442
						-0.300594	0.300594	23.3123	0.0428958	0.143424		1.84126e-06	0.000646055	0.143747	0.0673595		-0.0995889	0.402009	22.5427	0.0443602	0.101435		1.04251e-05	0.00045683	0.101664	0.539363		0.300594	0.300594	23.6015	0.0423703	0.143424		6.02283e-07	0.000646053	0.143747	0.0220336		0.106441	-0.106441	23.239	0.0430311	0.143424		6.67515e-07	0.000646055	0.143747	0.02442
						-0.300137	0.300137	23.3113	0.0428976	0.14407		1.84126e-06	0.000646055	0.144393	0.0673595		-0.099132	0.402009	22.5374	0.0443707	0.101892		1.0425e-05	0.00045683	0.102121	0.539357		0.300137	0.300137	23.6011	0.0423709	0.14407		6.02283e-07	0.000646053	0.144393	0.0220336		0.106898	-0.106898	23.2386	0.0430318	0.14407		6.67515e-07	0.000646055	0.144393	0.02442
						-0.29968	0.29968	23.3103	0.0428995	0.144716		1.84126e-06	0.000646055	0.145039	0.0673595		-0.0986752	0.402009	22.5321	0.0443811	0.102349		1.04249e-05	0.00045683	0.102577	0.539352		0.29968	0.299681	23.6008	0.0423715	0.144716		6.02283e-07	0.000646053	0.145039	0.0220336		0.107355	-0.107355	23.2383	0.0430325	0.144716		6.67515e-07	0.000646055	0.145039	0.02442
						-0.299223	0.299223	23.3093	0.0429013	0.145362		1.84126e-06	0.000646055	0.145685	0.0673595		-0.0982184	0.402009	22.5268	0.0443915	0.102806		1.04248e-05	0.00045683	0.103034	0.539347		0.299223	0.299224	23.6005	0.0423721	0.145362		6.06106e-07	0.000646053	0.145685	0.0221735		0.107812	-0.107812	23.2379	0.0430331	0.145362		6.67515e-07	0.000646055	0.145685	0.02442
						-0.298767	0.298767	23.3083	0.0429032	0.146008		1.84126e-06	0.000646055	0.146331	0.0673595		-0.0977615	0.402009	22.5215	0.0444019	0.103263		1.04247e-05	0.00045683	0.103491	0.539343		0.298767	0.298767	23.6001	0.0423727	0.146008		6.09935e-07	0.000646053	0.146331	0.0223136		0.108269	-0.108269	23.2376	0.0430338	0.146008		6.67515e-07	0.000646055	0.146331	0.02442
						-0.29831	0.29831	23.3073	0.042905	0.146654		1.84126e-06	0.000646055	0.146977	0.0673595		-0.0973047	0.402009	22.5162	0.0444124	0.103719		1.04246e-05	0.00045683	0.103948	0.539338		0.29831	0.29831	23.5998	0.0423733	0.146654		6.09935e-07	0.000646053	0.146977	0.0223136		0.108725	-0.108725	23.2372	0.0430345	0.146654		6.67515e-07	0.000646055	0.146977	0.02442
						-0.297853	0.297853	23.3063	0.0429069	0.1473		1.84126e-06	0.000646055	0.147623	0.0673595		-0.0968479	0.402009	22.511	0.0444228	0.104176		1.04246e-05	0.00045683	0.104405	0.539334		0.297853	0.297853	23.5994	0.0423739	0.1473		6.09935e-07	0.000646053	0.147623	0.0223136		0.109182	-0.109182	23.2368	0.0430351	0.1473		6.67515e-07	0.000646055	0.147623	0.02442
						-0.297396	0.297396	23.3053	0.0429087	0.147947		1.84126e-06	0.000646055	0.14827	0.0673595		-0.096391	0.402009	22.5057	0.0444332	0.104633		1.04245e-05	0.00045683	0.104862	0.53933		0.297396	0.297396	23.5991	0.0423745	0.147946		6.09935e-07	0.000646053	0.148269	0.0223136		0.109639	-0.109639	23.2365	0.0430358	0.147947		6.67515e-07	0.000646055	0.14827	0.02442
						-0.296939	0.296939	23.3043	0.0429105	0.148593		1.84126e-06	0.000646055	0.148916	0.0673595		-0.0959342	0.402009	22.5004	0.0444436	0.10509		1.04244e-05	0.00045683	0.105318	0.539326		0.296939	0.29694	23.5988	0.0423751	0.148592		6.09935e-07	0.000646053	0.148915	0.0223136		0.110096	-0.110096	23.2361	0.0430365	0.148593		6.67515e-07	0.000646055	0.148916	0.02442
						-0.296482	0.296482	23.3033	0.0429124	0.149239		1.78959e-06	0.000646055	0.149562	0.0654692		-0.0954774	0.402009	22.4951	0.0444541	0.105547		1.13358e-05	0.00045683	0.105775	0.586476		0.296482	0.296483	23.5984	0.0423757	0.149238		6.48613e-07	0.000646053	0.149561	0.0237285		0.110553	-0.110553	23.2358	0.0430371	0.149239		6.72484e-07	0.000646055	0.149562	0.0246018
						-0.296026	0.296026	23.3023	0.0429142	0.149885		1.78959e-06	0.000646055	0.150208	0.0654692		-0.0950206	0.402009	22.4894	0.0444654	0.106004		1.13382e-05	0.00045683	0.106232	0.586601		0.296026	0.296026	23.5981	0.0423764	0.149884		6.48629e-07	0.000646053	0.150207	0.0237291		0.11101	-0.11101	23.2354	0.0430378	0.149885		6.72484e-07	0.000646055	0.150208	0.0246018
						-0.295569	0.295569	23.3014	0.042916	0.150531		1.78959e-06	0.000646055	0.150854	0.0654692		-0.0945637	0.402009	22.4837	0.0444767	0.10646		1.13381e-05	0.00045683	0.106689	0.586597		0.295569	0.295569	23.5977	0.042377	0.15053		6.48629e-07	0.000646053	0.150853	0.0237291		0.111466	-0.111466	23.235	0.0430385	0.150531		6.72484e-07	0.000646055	0.150854	0.0246018
						-0.295112	0.295112	23.3004	0.0429177	0.151177		1.78959e-06	0.000646055	0.1515	0.0654692		-0.0941069	0.40201	22.4779	0.0444881	0.106917		1.1338e-05	0.00045683	0.107146	0.586594		0.295112	0.295112	23.5973	0.0423777	0.151177		6.48629e-07	0.000646053	0.1515	0.0237291		0.111923	-0.111923	23.2347	0.0430391	0.151177		6.72484e-07	0.000646055	0.1515	0.0246018
						-0.294655	0.294655	23.2994	0.0429195	0.151823		1.78959e-06	0.000646055	0.152146	0.0654692		-0.0936501	0.40201	22.4722	0.0444994	0.107374		1.1338e-05	0.00045683	0.107602	0.58659		0.294655	0.294655	23.597	0.0423783	0.151823		6.48629e-07	0.000646053	0.152146	0.0237291		0.11238	-0.11238	23.2343	0.0430398	0.151823		6.72484e-07	0.000646055	0.152146	0.0246018
						-0.294198	0.294198	23.2984	0.0429213	0.152469		1.78959e-06	0.000646055	0.152792	0.0654692		-0.0931932	0.40201	22.4665	0.0445108	0.107831		1.13379e-05	0.00045683	0.108059	0.586587		0.294198	0.294199	23.5966	0.042379	0.152469		6.52044e-07	0.000646053	0.152792	0.0238541		0.112837	-0.112837	23.2339	0.0430405	0.152469		6.72484e-07	0.000646055	0.152792	0.0246018
						-0.293741	0.293741	23.2975	0.0429231	0.153115		1.78959e-06	0.000646055	0.153438	0.0654692		-0.0927364	0.40201	22.4608	0.0445221	0.108288		1.13379e-05	0.00045683	0.108516	0.586584		0.293741	0.293742	23.5962	0.0423796	0.153115		6.55465e-07	0.000646053	0.153438	0.0239792		0.113294	-0.113294	23.2336	0.0430412	0.153115		6.72484e-07	0.000646055	0.153438	0.0246018
						-0.293285	0.293285	23.2965	0.0429249	0.153761		1.78959e-06	0.000646055	0.154084	0.0654692		-0.0922796	0.40201	22.455	0.0445334	0.108745		1.13378e-05	0.00045683	0.108973	0.586582		0.293285	0.293285	23.5959	0.0423803	0.153761		6.55465e-07	0.000646053	0.154084	0.0239792		0.113751	-0.113751	23.2332	0.0430418	0.153761		6.72484e-07	0.000646055	0.154084	0.0246018
						-0.292828	0.292828	23.2955	0.0429267	0.154407		1.78959e-06	0.000646055	0.15473	0.0654692		-0.0918228	0.40201	22.4493	0.0445448	0.109201		1.13378e-05	0.00045683	0.10943	0.586579		0.292828	0.292828	23.5955	0.0423809	0.154407		6.55465e-07	0.000646053	0.15473	0.0239792		0.114207	-0.114207	23.2328	0.0430425	0.154407		6.72484e-07	0.000646055	0.15473	0.0246018
						-0.292371	0.292371	23.2946	0.0429285	0.155053		1.78959e-06	0.000646055	0.155376	0.0654692		-0.0913659	0.40201	22.4436	0.0445561	0.109658		1.13377e-05	0.00045683	0.109887	0.586577		0.292371	0.292371	23.5952	0.0423816	0.155053		6.55465e-07	0.000646053	0.155376	0.0239792		0.114664	-0.114664	23.2325	0.0430432	0.155053		6.72484e-07	0.000646055	0.155376	0.0246018
						-0.291914	0.291914	23.2936	0.0429303	0.155699		1.78959e-06	0.000646055	0.156022	0.0654692		-0.0909091	0.40201	22.4379	0.0445674	0.110115		1.13377e-05	0.00045683	0.110343	0.586575		0.291914	0.291915	23.5948	0.0423822	0.155699		6.55465e-07	0.000646053	0.156022	0.0239792		0.115121	-0.115121	23.2321	0.0430438	0.155699		6.72484e-07	0.000646055	0.156022	0.0246018
						-0.291457	0.291457	23.2926	0.0429321	0.156345		1.73065e-06	0.000646055	0.156668	0.0633133		-0.0904523	0.40201	22.4322	0.0445788	0.110572		1.23281e-05	0.00045683	0.1108	0.637818		0.291457	0.291458	23.5944	0.0423829	0.156345		6.95834e-07	0.000646053	0.156668	0.0254561		0.115578	-0.115578	23.2318	0.0430445	0.156345		6.73241e-07	0.000646055	0.156668	0.0246295
						-0.291	0.291	23.2917	0.0429338	0.156991		1.73065e-06	0.000646055	0.157314	0.0633133		-0.0899954	0.40201	22.426	0.0445911	0.111029		1.23293e-05	0.00045683	0.111257	0.637881		0.291	0.291001	23.594	0.0423836	0.156991		6.95852e-07	0.000646053	0.157314	0.0254567		0.116035	-0.116035	23.2314	0.0430452	0.156991		6.73241e-07	0.000646055	0.157314	0.0246295
						-0.290544	0.290544	23.2907	0.0429355	0.157637		1.73065e-06	0.000646055	0.15796	0.0633133		-0.0895386	0.40201	22.4198	0.0446034	0.111486		1.23293e-05	0.00045683	0.111714	0.637879		0.290544	0.290544	23.5936	0.0423843	0.157637		6.95852e-07	0.000646053	0.15796	0.0254567		0.116492	-0.116492	23.231	0.0430459	0.157637		6.73241e-07	0.000646055	0.15796	0.0246295
						-0.290087	0.290087	23.2898	0.0429373	0.158283		1.73065e-06	0.000646055	0.158606	0.0633133		-0.0890818	0.40201	22.4136	0.0446158	0.111942		1.23293e-05	0.00045683	0.112171	0.637877		0.290087	0.290087	23.5933	0.042385	0.158283		6.95852e-07	0.000646053	0.158606	0.0254567		0.116948	-0.116948	23.2307	0.0430465	0.158283		6.73241e-07	0.000646055	0.158606	0.0246295
						-0.28963	0.28963	23.2889	0.042939	0.158929		1.73065e-06	0.000646055	0.159252	0.0633133		-0.0886249	0.40201	22.4074	0.0446281	0.112399		1.23292e-05	0.00045683	0.112628	0.637875		0.28963	0.28963	23.5929	0.0423857	0.158929		6.95852e-07	0.000646053	0.159252	0.0254567		0.117405	-0.117405	23.2303	0.0430472	0.158929		6.73241e-07	0.000646055	0.159252	0.0246295
						-0.289173	0.289173	23.2879	0.0429407	0.159575		1.73065e-06	0.000646055	0.159899	0.0633133		-0.0881681	0.40201	22.4012	0.0446404	0.112856		1.23292e-05	0.00045683	0.113084	0.637873		0.289173	0.289174	23.5925	0.0423864	0.159575		6.98769e-07	0.000646053	0.159898	0.0255634		0.117862	-0.117862	23.2299	0.0430479	0.159575		6.73241e-07	0.000646055	0.159899	0.0246295
						-0.288716	0.288716	23.287	0.0429424	0.160222		1.73065e-06	0.000646055	0.160545	0.0633133		-0.0877113	0.40201	22.395	0.0446528	0.113313		1.23292e-05	0.00045683	0.113541	0.637871		0.288716	0.288717	23.5921	0.0423871	0.160221		7.01691e-07	0.000646053	0.160544	0.0256703		0.118319	-0.118319	23.2296	0.0430486	0.160222		6.73241e-07	0.000646055	0.160545	0.0246295
						-0.288259	0.288259	23.286	0.0429442	0.160868		1.73065e-06	0.000646055	0.161191	0.0633133		-0.0872545	0.40201	22.3888	0.0446651	0.11377		1.23291e-05	0.00045683	0.113998	0.63787		0.288259	0.28826	23.5917	0.0423878	0.160867		7.01692e-07	0.000646053	0.16119	0.0256703		0.118776	-0.118776	23.2292	0.0430492	0.160868		6.73241e-07	0.000646055	0.161191	0.0246295
						-0.287803	0.287803	23.2851	0.0429459	0.161514		1.73065e-06	0.000646055	0.161837	0.0633133		-0.0867976	0.40201	22.3827	0.0446774	0.114227		1.23291e-05	0.00045683	0.114455	0.637868		0.287803	0.287803	23.5913	0.0423885	0.161513		7.01692e-07	0.000646053	0.161836	0.0256703		0.119233	-0.119233	23.2289	0.0430499	0.161514		6.73241e-07	0.000646055	0.161837	0.0246295
						-0.287346	0.287346	23.2842	0.0429476	0.16216		1.73065e-06	0.000646055	0.162483	0.0633133		-0.0863408	0.40201	22.3765	0.0446897	0.114683		1.23291e-05	0.00045683	0.114912	0.637867		0.287346	0.287346	23.5909	0.0423892	0.162159		7.01692e-07	0.000646053	0.162482	0.0256703		0.119689	-0.119689	23.2285	0.0430506	0.16216		6.73241e-07	0.000646055	0.162483	0.0246295
						-0.286889	0.286889	23.2832	0.0429494	0.162806		1.73065e-06	0.000646055	0.163129	0.0633133		-0.085884	0.40201	22.3703	0.0447021	0.11514		1.23291e-05	0.00045683	0.115369	0.637866		0.286889	0.286889	23.5905	0.0423899	0.162805		7.01692e-07	0.000646053	0.163128	0.0256703		0.120146	-0.120146	23.2281	0.0430513	0.162806		6.73241e-07	0.000646055	0.163129	0.0246295
						-0.286432	0.286432	23.2823	0.0429511	0.163452		1.66477e-06	0.000646055	0.163775	0.060903		-0.0854271	0.40201	22.3642	0.0447144	0.115597		1.33824e-05	0.00045683	0.115825	0.692362		0.286432	0.286433	23.5901	0.0423906	0.163452		7.43649e-07	0.000646053	0.163775	0.0272053		0.120603	-0.120603	23.2278	0.0430519	0.163452		6.69515e-07	0.000646055	0.163775	0.0244932
						-0.285975	0.285975	23.2814	0.0429528	0.164098		1.66477e-06	0.000646055	0.164421	0.060903		-0.0849703	0.40201	22.3575	0.0447278	0.116054		1.33829e-05	0.00045683	0.116282	0.692391		0.285975	0.285976	23.5897	0.0423913	0.164098		7.43668e-07	0.000646053	0.164421	0.027206		0.12106	-0.12106	23.2274	0.0430526	0.164098		6.69515e-07	0.000646055	0.164421	0.0244932
						-0.285519	0.285519	23.2805	0.0429544	0.164744		1.66477e-06	0.000646055	0.165067	0.060903		-0.0845135	0.40201	22.3508	0.0447412	0.116511		1.33829e-05	0.00045683	0.116739	0.69239		0.285519	0.285519	23.5893	0.0423921	0.164744		7.43668e-07	0.000646053	0.165067	0.027206		0.121517	-0.121517	23.227	0.0430533	0.164744		6.69515e-07	0.000646055	0.165067	0.0244932
						-0.285062	0.285062	23.2796	0.0429561	0.16539		1.66477e-06	0.000646055	0.165713	0.060903		-0.0840566	0.40201	22.3441	0.0447546	0.116968		1.33829e-05	0.00045683	0.117196	0.692389		0.285062	0.285062	23.5889	0.0423928	0.16539		7.43668e-07	0.000646053	0.165713	0.027206		0.121974	-0.121973	23.2267	0.0430539	0.16539		6.69515e-07	0.000646055	0.165713	0.0244932
						-0.284605	0.284605	23.2787	0.0429578	0.166036		1.66477e-06	0.000646055	0.166359	0.060903		-0.0835998	0.40201	22.3374	0.0447679	0.117424		1.33829e-05	0.00045683	0.117653	0.692388		0.284605	0.284605	23.5885	0.0423936	0.166036		7.43668e-07	0.000646053	0.166359	0.027206		0.12243	-0.12243	23.2263	0.0430546	0.166036		6.69515e-07	0.000646055	0.166359	0.0244932
						-0.284148	0.284148	23.2778	0.0429594	0.166682		1.66477e-06	0.000646055	0.167005	0.060903		-0.083143	0.40201	22.3307	0.0447813	0.117881		1.33829e-05	0.00045683	0.11811	0.692387		0.284148	0.284148	23.5881	0.0423943	0.166682		7.45995e-07	0.000646053	0.167005	0.0272911		0.122887	-0.122887	23.226	0.0430553	0.166682		6.69515e-07	0.000646055	0.167005	0.0244932
						-0.283691	0.283691	23.2769	0.0429611	0.167328		1.66477e-06	0.000646055	0.167651	0.060903		-0.0826862	0.40201	22.3241	0.0447947	0.118338		1.33829e-05	0.00045683	0.118566	0.692386		0.283691	0.283692	23.5877	0.042395	0.167328		7.48326e-07	0.000646053	0.167651	0.0273764		0.123344	-0.123344	23.2256	0.0430559	0.167328		6.69515e-07	0.000646055	0.167651	0.0244932
						-0.283234	0.283234	23.276	0.0429628	0.167974		1.66477e-06	0.000646055	0.168297	0.060903		-0.0822293	0.40201	22.3174	0.0448081	0.118795		1.33828e-05	0.00045683	0.119023	0.692385		0.283234	0.283235	23.5872	0.0423958	0.167974		7.48326e-07	0.000646053	0.168297	0.0273764		0.123801	-0.123801	23.2252	0.0430566	0.167974		6.69515e-07	0.000646055	0.168297	0.0244932
						-0.282778	0.282778	23.2751	0.0429644	0.16862		1.66477e-06	0.000646055	0.168943	0.060903		-0.0817725	0.40201	22.3107	0.0448215	0.119252		1.33828e-05	0.00045683	0.11948	0.692384		0.282778	0.282778	23.5868	0.0423965	0.16862		7.48326e-07	0.000646053	0.168943	0.0273764		0.124258	-0.124258	23.2249	0.0430573	0.16862		6.69515e-07	0.000646055	0.168943	0.0244932
						-0.282321	0.282321	23.2742	0.0429661	0.169266		1.66477e-06	0.000646055	0.169589	0.060903		-0.0813157	0.40201	22.3041	0.0448349	0.119708		1.33828e-05	0.00045683	0.119937	0.692384		0.282321	0.282321	23.5864	0.0423973	0.169266		7.48326e-07	0.000646053	0.169589	0.0273764		0.124714	-0.124714	23.2245	0.043058	0.169266		6.69515e-07	0.000646055	0.169589	0.0244932
						-0.281864	0.281864	23.2733	0.0429677	0.169912		1.66477e-06	0.000646055	0.170235	0.060903		-0.0808588	0.40201	22.2974	0.0448482	0.120165		1.33828e-05	0.00045683	0.120394	0.692383		0.281864	0.281864	23.586	0.042398	0.169912		7.48326e-07	0.000646053	0.170235	0.0273764		0.125171	-0.125171	23.2242	0.0430586	0.169912		6.69515e-07	0.000646055	0.170235	0.0244932
						-0.281407	0.281407	23.2724	0.0429694	0.170558		1.59231e-06	0.000646055	0.170881	0.0582522		-0.080402	0.40201	22.2908	0.0448616	0.120622		1.44951e-05	0.00045683	0.120851	0.749929		0.281407	0.281407	23.5856	0.0423988	0.170558		7.91755e-07	0.000646053	0.170881	0.0289652		0.125628	-0.125628	23.2238	0.0430593	0.170558		6.61042e-07	0.000646055	0.170881	0.0241832
						-0.28095	0.28095	23.2715	0.042971	0.171204		1.59231e-06	0.000646055	0.171528	0.0582522		-0.0799452	0.40201	22.2836	0.0448761	0.121079		1.44953e-05	0.00045683	0.121307	0.749941		0.28095	0.280951	23.5851	0.0423996	0.171204		7.91776e-07	0.000646053	0.171527	0.028966		0.126085	-0.126085	23.2234	0.04306	0.171204		6.61042e-07	0.000646055	0.171527	0.0241832
						-0.280493	0.280493	23.2706	0.0429726	0.171851		1.59231e-06	0.000646055	0.172174	0.0582522		-0.0794884	0.40201	22.2764	0.0448906	0.121536		1.44953e-05	0.00045683	0.121764	0.749941		0.280493	0.280494	23.5847	0.0424004	0.17185		7.91776e-07	0.000646053	0.172173	0.028966		0.126542	-0.126542	23.2231	0.0430606	0.171851		6.61042e-07	0.000646055	0.172174	0.0241832
						-0.280037	0.280037	23.2698	0.0429742	0.172497		1.59231e-06	0.000646055	0.17282	0.0582522		-0.0790315	0.40201	22.2692	0.0449051	0.121993		1.44953e-05	0.00045683	0.122221	0.74994		0.280037	0.280037	23.5843	0.0424012	0.172496		7.91776e-07	0.000646053	0.172819	0.028966		0.126999	-0.126999	23.2227	0.0430613	0.172497		6.61042e-07	0.000646055	0.17282	0.0241832
						-0.27958	0.27958	23.2689	0.0429758	0.173143		1.59231e-06	0.000646055	0.173466	0.0582522		-0.0785747	0.40201	22.262	0.0449196	0.122449		1.44953e-05	0.00045683	0.122678	0.74994		0.27958	0.27958	23.5838	0.042402	0.173142		7.91776e-07	0.000646053	0.173465	0.028966		0.127455	-0.127455	23.2224	0.0430619	0.173143		6.61042e-07	0.000646055	0.173466	0.0241832
						-0.279123	0.279123	23.2681	0.0429774	0.173789		1.59231e-06	0.000646055	0.174112	0.0582522		-0.0781179	0.40201	22.2548	0.0449341	0.122906		1.44953e-05	0.00045683	0.123135	0.749939		0.279123	0.279123	23.5834	0.0424028	0.173788		7.93418e-07	0.000646053	0.174111	0.029026		0.127912	-0.127912	23.222	0.0430626	0.173789		6.61042e-07	0.000646055	0.174112	0.0241832
						-0.278666	0.278666	23.2672	0.042979	0.174435		1.59231e-06	0.000646055	0.174758	0.0582522		-0.077661	0.40201	22.2476	0.0449486	0.123363		1.44953e-05	0.00045683	0.123592	0.749939		0.278666	0.278667	23.5829	0.0424035	0.174434		7.95064e-07	0.000646053	0.174757	0.0290863		0.128369	-0.128369	23.2217	0.0430633	0.174435		6.61042e-07	0.000646055	0.174758	0.0241832
						-0.278209	0.278209	23.2663	0.0429806	0.175081		1.59231e-06	0.000646055	0.175404	0.0582522		-0.0772042	0.40201	22.2405	0.0449631	0.12382		1.44953e-05	0.00045683	0.124048	0.749938		0.278209	0.27821	23.5825	0.0424043	0.17508		7.95064e-07	0.000646053	0.175404	0.0290863		0.128826	-0.128826	23.2213	0.0430639	0.175081		6.61042e-07	0.000646055	0.175404	0.0241832
						-0.277752	0.277752	23.2655	0.0429822	0.175727		1.59231e-06	0.000646055	0.17605	0.0582522		-0.0767474	0.40201	22.2333	0.0449776	0.124277		1.44953e-05	0.00045683	0.124505	0.749938		0.277752	0.277753	23.5821	0.0424051	0.175727		7.95064e-07	0.000646053	0.17605	0.0290863		0.129283	-0.129283	23.2209	0.0430646	0.175727		6.61042e-07	0.000646055	0.17605	0.0241832
						-0.277296	0.277296	23.2646	0.0429837	0.176373		1.59231e-06	0.000646055	0.176696	0.0582522		-0.0762905	0.40201	22.2261	0.0449921	0.124734		1.44952e-05	0.00045683	0.124962	0.749938		0.277296	0.277296	23.5816	0.0424059	0.176373		7.95064e-07	0.000646053	0.176696	0.0290863		0.12974	-0.12974	23.2206	0.0430652	0.176373		6.61042e-07	0.000646055	0.176696	0.0241832
						-0.276839	0.276839	23.2637	0.0429853	0.177019		1.59231e-06	0.000646055	0.177342	0.0582522		-0.0758337	0.40201	22.219	0.0450066	0.12519		1.44952e-05	0.00045683	0.125419	0.749937		0.276839	0.276839	23.5812	0.0424067	0.177019		7.95064e-07	0.000646053	0.177342	0.0290863		0.130196	-0.130196	23.2202	0.0430659	0.177019		6.61042e-07	0.000646055	0.177342	0.0241832
						-0.276382	0.276382	23.2629	0.0429869	0.177665		1.51373e-06	0.000646055	0.177988	0.0553775		-0.0753769	0.40201	22.2118	0.0450211	0.125647		1.5735e-05	0.00045683	0.125876	0.814078		0.276382	0.276382	23.5807	0.0424075	0.177665		8.3983e-07	0.000646053	0.177988	0.0307239		0.130653	-0.130653	23.2199	0.0430666	0.177665		6.47571e-07	0.000646055	0.177988	0.0236904
						-0.275925	0.275925	23.2621	0.0429884	0.178311		1.51373e-06	0.000646055	0.178634	0.0553775		-0.0749201	0.40201	22.2041	0.0450368	0.126104		1.57351e-05	0.00045683	0.126333	0.814082		0.275925	0.275926	23.5803	0.0424084	0.178311		8.39853e-07	0.000646053	0.178634	0.0307248		0.13111	-0.13111	23.2195	0.0430672	0.178311		6.47571e-07	0.000646055	0.178634	0.0236904
						-0.275468	0.275468	23.2612	0.04299	0.178957		1.51373e-06	0.000646055	0.17928	0.0553775		-0.0744632	0.40201	22.1963	0.0450525	0.126561		1.57351e-05	0.00045683	0.126789	0.814082		0.275468	0.275469	23.5798	0.0424092	0.178957		8.39853e-07	0.000646053	0.17928	0.0307248		0.131567	-0.131567	23.2192	0.0430679	0.178957		6.47571e-07	0.000646055	0.17928	0.0236904
						-0.275011	0.275011	23.2604	0.0429915	0.179603		1.51373e-06	0.000646055	0.179926	0.0553775		-0.0740064	0.40201	22.1886	0.0450683	0.127018		1.57351e-05	0.00045683	0.127246	0.814082		0.275011	0.275012	23.5793	0.04241	0.179603		8.39853e-07	0.000646053	0.179926	0.0307248		0.132024	-0.132024	23.2188	0.0430685	0.179603		6.47571e-07	0.000646055	0.179926	0.0236904
						-0.274555	0.274555	23.2596	0.042993	0.180249		1.51373e-06	0.000646055	0.180572	0.0553775		-0.0735496	0.40201	22.1808	0.045084	0.127475		1.57351e-05	0.00045683	0.127703	0.814081		0.274555	0.274555	23.5789	0.0424109	0.180249		8.39853e-07	0.000646053	0.180572	0.0307248		0.132481	-0.132481	23.2185	0.0430692	0.180249		6.47571e-07	0.000646055	0.180572	0.0236904
						-0.274098	0.274098	23.2588	0.0429945	0.180895		1.51373e-06	0.000646055	0.181218	0.0553775		-0.0730927	0.40201	22.1731	0.0450997	0.127931		1.5735e-05	0.00045683	0.12816	0.814081		0.274098	0.274098	23.5784	0.0424117	0.180895		8.40718e-07	0.000646053	0.181218	0.0307564		0.132937	-0.132937	23.2181	0.0430698	0.180895		6.47571e-07	0.000646055	0.181218	0.0236904
						-0.273641	0.273641	23.258	0.042996	0.181541		1.51373e-06	0.000646055	0.181864	0.0553775		-0.0726359	0.40201	22.1653	0.0451155	0.128388		1.5735e-05	0.00045683	0.128617	0.814081		0.273641	0.273641	23.5779	0.0424126	0.181541		8.41585e-07	0.000646053	0.181864	0.0307882		0.133394	-0.133394	23.2178	0.0430704	0.181541		6.47571e-07	0.000646055	0.181864	0.0236904
						-0.273184	0.273184	23.2572	0.0429975	0.182187		1.51373e-06	0.000646055	0.18251	0.0553775		-0.0721791	0.40201	22.1576	0.0451312	0.128845		1.5735e-05	0.00045683	0.129073	0.814081		0.273184	0.273185	23.5775	0.0424134	0.182187		8.41585e-07	0.000646053	0.18251	0.0307882		0.133851	-0.133851	23.2174	0.0430711	0.182187		6.47571e-07	0.000646055	0.18251	0.0236904
						-0.272727	0.272727	23.2563	0.042999	0.182833		1.51373e-06	0.000646055	0.183156	0.0553775		-0.0717222	0.40201	22.1499	0.0451469	0.129302		1.5735e-05	0.00045683	0.12953	0.814081		0.272727	0.272728	23.577	0.0424142	0.182833		8.41585e-07	0.000646053	0.183156	0.0307882		0.134308	-0.134308	23.2171	0.0430717	0.182833		6.47571e-07	0.000646055	0.183156	0.0236904
						-0.27227	0.27227	23.2555	0.0430006	0.18348		1.51373e-06	0.000646055	0.183803	0.0553775		-0.0712654	0.40201	22.1422	0.0451627	0.129759		1.5735e-05	0.00045683	0.129987	0.814081		0.27227	0.272271	23.5765	0.0424151	0.183479		8.41585e-07	0.000646053	0.183802	0.0307882		0.134765	-0.134765	23.2167	0.0430724	0.18348		6.47571e-07	0.000646055	0.183803	0.0236904
						-0.271814	0.271814	23.2547	0.0430021	0.184126		1.51373e-06	0.000646055	0.184449	0.0553775		-0.0708086	0.40201	22.1345	0.0451784	0.130216		1.5735e-05	0.00045683	0.130444	0.81408		0.271814	0.271814	23.5761	0.0424159	0.184125		8.41585e-07	0.000646053	0.184448	0.0307882		0.135222	-0.135222	23.2164	0.043073	0.184126		6.47571e-07	0.000646055	0.184449	0.0236904
						-0.271357	0.271357	23.2539	0.0430036	0.184772		1.42954e-06	0.000646055	0.185095	0.0522977		-0.0703518	0.40201	22.1268	0.0451942	0.130672		1.74035e-05	0.00045683	0.130901	0.900403		0.271357	0.271357	23.5756	0.0424168	0.184771		8.8754e-07	0.000646053	0.185094	0.0324693		0.135678	-0.135678	23.216	0.0430737	0.184772		6.2887e-07	0.000646055	0.185095	0.0230062
						-0.2709	0.2709	23.2531	0.043005	0.185418		1.42954e-06	0.000646055	0.185741	0.0522977		-0.0698949	0.40201	22.1182	0.0452116	0.131129		1.74036e-05	0.00045683	0.131358	0.900405		0.2709	0.2709	23.5751	0.0424177	0.185417		8.87564e-07	0.000646053	0.18574	0.0324702		0.136135	-0.136135	23.2157	0.0430743	0.185418		6.2887e-07	0.000646055	0.185741	0.0230062
						-0.270443	0.270443	23.2523	0.0430064	0.186064		1.42954e-06	0.000646055	0.186387	0.0522977		-0.0694381	0.40201	22.1097	0.045229	0.131586		1.74036e-05	0.00045683	0.131814	0.900405		0.270443	0.270444	23.5746	0.0424185	0.186063		8.87564e-07	0.000646053	0.186386	0.0324702		0.136592	-0.136592	23.2154	0.0430749	0.186064		6.2887e-07	0.000646055	0.186387	0.0230062
						-0.269986	0.269986	23.2516	0.0430079	0.18671		1.42954e-06	0.000646055	0.187033	0.0522977		-0.0689813	0.40201	22.1012	0.0452464	0.132043		1.74036e-05	0.00045683	0.132271	0.900405		0.269986	0.269987	23.5741	0.0424194	0.186709		8.87564e-07	0.000646053	0.187032	0.0324702		0.137049	-0.137049	23.215	0.0430756	0.18671		6.2887e-07	0.000646055	0.187033	0.0230062
						-0.269529	0.269529	23.2508	0.0430093	0.187356		1.42954e-06	0.000646055	0.187679	0.0522977		-0.0685244	0.40201	22.0927	0.0452638	0.1325		1.74036e-05	0.00045683	0.132728	0.900405		0.269529	0.26953	23.5736	0.0424203	0.187355		8.87564e-07	0.000646053	0.187679	0.0324702		0.137506	-0.137506	23.2147	0.0430762	0.187356		6.2887e-07	0.000646055	0.187679	0.0230062
						-0.269073	0.269073	23.25	0.0430107	0.188002		1.42954e-06	0.000646055	0.188325	0.0522977		-0.0680676	0.40201	22.0842	0.0452812	0.132957		1.74036e-05	0.00045683	0.133185	0.900405		0.269073	0.269073	23.5731	0.0424212	0.188002		8.87561e-07	0.000646053	0.188325	0.0324701		0.137963	-0.137963	23.2143	0.0430768	0.188002		6.2887e-07	0.000646055	0.188325	0.0230062
						-0.268616	0.268616	23.2492	0.0430122	0.188648		1.42954e-06	0.000646055	0.188971	0.0522977		-0.0676108	0.40201	22.0758	0.0452986	0.133413		1.74036e-05	0.00045683	0.133642	0.900405		0.268616	0.268616	23.5726	0.0424221	0.188648		8.87557e-07	0.000646053	0.188971	0.03247		0.138419	-0.138419	23.214	0.0430775	0.188648		6.2887e-07	0.000646055	0.188971	0.0230062
						-0.268159	0.268159	23.2485	0.0430136	0.189294		1.42954e-06	0.000646055	0.189617	0.0522977		-0.067154	0.40201	22.0673	0.045316	0.13387		1.74036e-05	0.00045683	0.134099	0.900404		0.268159	0.268159	23.5721	0.042423	0.189294		8.87557e-07	0.000646053	0.189617	0.03247		0.138876	-0.138876	23.2137	0.0430781	0.189294		6.2887e-07	0.000646055	0.189617	0.0230062
						-0.267702	0.267702	23.2477	0.043015	0.18994		1.42954e-06	0.000646055	0.190263	0.0522977		-0.0666971	0.40201	22.0588	0.0453334	0.134327		1.74036e-05	0.00045683	0.134555	0.900404		0.267702	0.267703	23.5716	0.0424239	0.18994		8.87557e-07	0.000646053	0.190263	0.03247		0.139333	-0.139333	23.2133	0.0430787	0.18994		6.2887e-07	0.000646055	0.190263	0.0230062
						-0.267245	0.267245	23.2469	0.0430164	0.190586		1.42954e-06	0.000646055	0.190909	0.0522977		-0.0662403	0.40201	22.0503	0.0453508	0.134784		1.74036e-05	0.00045683	0.135012	0.900404		0.267245	0.267246	23.5711	0.0424248	0.190586		8.87557e-07	0.000646053	0.190909	0.03247		0.13979	-0.13979	23.213	0.0430793	0.190586		6.2887e-07	0.000646055	0.190909	0.0230062
						-0.266788	0.266788	23.2461	0.0430179	0.191232		1.42954e-06	0.000646055	0.191555	0.0522977		-0.0657835	0.40201	22.0419	0.0453682	0.135241		1.74036e-05	0.00045683	0.135469	0.900404		0.266788	0.266789	23.5707	0.0424256	0.191232		8.87557e-07	0.000646053	0.191555	0.03247		0.140247	-0.140247	23.2126	0.04308	0.191232		6.2887e-07	0.000646055	0.191555	0.0230062
						-0.266332	0.266332	23.2454	0.0430193	0.191878		1.34032e-06	0.000646055	0.192201	0.0490337		-0.0653266	0.40201	22.0334	0.0453856	0.135698		2.03296e-05	0.00045683	0.135926	1.05179		0.266332	0.266332	23.5702	0.0424265	0.191878		9.3454e-07	0.000646053	0.192201	0.0341888		0.140704	-0.140704	23.2123	0.0430806	0.191878		6.04728e-07	0.000646055	0.192201	0.022123
						-0.265875	0.265875	23.2447	0.0430206	0.192524		1.34032e-06	0.000646055	0.192847	0.0490337		-0.0648698	0.40201	22.0236	0.0454059	0.136154		2.03296e-05	0.00045683	0.136383	1.05179		0.265875	0.265875	23.5696	0.0424275	0.192524		9.34566e-07	0.000646053	0.192847	0.0341897		0.14116	-0.14116	23.212	0.0430812	0.192524		6.04728e-07	0.000646055	0.192847	0.022123
						-0.265418	0.265418	23.2439	0.043022	0.19317		1.34032e-06	0.000646055	0.193493	0.0490337		-0.064413	0.40201	22.0137	0.0454262	0.136611		2.03296e-05	0.00045683	0.13684	1.05179		0.265418	0.265419	23.5691	0.0424284	0.19317		9.34566e-07	0.000646053	0.193493	0.0341897		0.141617	-0.141617	23.2117	0.0430818	0.19317		6.04728e-07	0.000646055	0.193493	0.022123
						-0.264961	0.264961	23.2432	0.0430233	0.193816		1.34032e-06	0.000646055	0.194139	0.0490337		-0.0639561	0.40201	22.0039	0.0454466	0.137068		2.03296e-05	0.00045683	0.137296	1.05179		0.264961	0.264962	23.5686	0.0424293	0.193816		9.34566e-07	0.000646053	0.194139	0.0341897		0.142074	-0.142074	23.2113	0.0430824	0.193816		6.04728e-07	0.000646055	0.194139	0.022123
						-0.264504	0.264504	23.2425	0.0430247	0.194462		1.34032e-06	0.000646055	0.194785	0.0490337		-0.0634993	0.40201	21.994	0.0454669	0.137525		2.03296e-05	0.00045683	0.137753	1.05179		0.264504	0.264505	23.5681	0.0424303	0.194462		9.34566e-07	0.000646053	0.194785	0.0341897		0.142531	-0.142531	23.211	0.043083	0.194462		6.04728e-07	0.000646055	0.194785	0.022123
						-0.264048	0.264048	23.2418	0.043026	0.195108		1.34032e-06	0.000646055	0.195432	0.0490337		-0.0630425	0.40201	21.9842	0.0454872	0.137982		2.03296e-05	0.00045683	0.13821	1.05179		0.264048	0.264048	23.5676	0.0424312	0.195108		9.33606e-07	0.000646053	0.195431	0.0341546		0.142988	-0.142988	23.2107	0.0430836	0.195108		6.04728e-07	0.000646055	0.195432	0.022123
						-0.263591	0.263591	23.241	0.0430273	0.195755		1.34032e-06	0.000646055	0.196078	0.0490337		-0.0625857	0.40201	21.9744	0.0455076	0.138438		2.03296e-05	0.00045683	0.138667	1.05179		0.263591	0.263591	23.567	0.0424321	0.195754		9.32644e-07	0.000646053	0.196077	0.0341194		0.143444	-0.143444	23.2103	0.0430842	0.195755		6.04728e-07	0.000646055	0.196078	0.022123
						-0.263134	0.263134	23.2403	0.0430287	0.196401		1.34032e-06	0.000646055	0.196724	0.0490337		-0.0621288	0.40201	21.9646	0.0455279	0.138895		2.03296e-05	0.00045683	0.139124	1.05179		0.263134	0.263134	23.5665	0.0424331	0.1964		9.32644e-07	0.000646053	0.196723	0.0341194		0.143901	-0.143901	23.21	0.0430848	0.196401		6.04728e-07	0.000646055	0.196724	0.022123
						-0.262677	0.262677	23.2396	0.04303	0.197047		1.34032e-06	0.000646055	0.19737	0.0490337		-0.061672	0.40201	21.9548	0.0455482	0.139352		2.03296e-05	0.00045683	0.139581	1.05179		0.262677	0.262678	23.566	0.042434	0.197046		9.32644e-07	0.000646053	0.197369	0.0341194		0.144358	-0.144358	23.2097	0.0430854	0.197047		6.04728e-07	0.000646055	0.19737	0.022123
						-0.26222	0.26222	23.2389	0.0430314	0.197693		1.34032e-06	0.000646055	0.198016	0.0490337		-0.0612152	0.40201	21.945	0.0455686	0.139809		2.03296e-05	0.00045683	0.140037	1.05179		0.26222	0.262221	23.5655	0.0424349	0.197692		9.32644e-07	0.000646053	0.198015	0.0341194		0.144815	-0.144815	23.2094	0.043086	0.197693		6.04728e-07	0.000646055	0.198016	0.022123
						-0.261763	0.261763	23.2381	0.0430327	0.198339		1.34032e-06	0.000646055	0.198662	0.0490337		-0.0607583	0.40201	21.9352	0.0455889	0.140266		2.03296e-05	0.00045683	0.140494	1.05179		0.261763	0.261764	23.565	0.0424359	0.198338		9.32644e-07	0.000646053	0.198661	0.0341194		0.145272	-0.145272	23.209	0.0430867	0.198339		6.04728e-07	0.000646055	0.198662	0.022123
						-0.261307	0.261307	23.2374	0.043034	0.198985		1.2467e-06	0.000646055	0.199308	0.0456086		-0.0603015	0.40201	21.9254	0.0456092	0.140723		2.55087e-05	0.00045683	0.140951	1.31974		0.261307	0.261307	23.5645	0.0424368	0.198984		9.8048e-07	0.000646053	0.199307	0.0358695		0.145729	-0.145729	23.2087	0.0430873	0.198985		5.74962e-07	0.000646055	0.199308	0.0210341
						-0.26085	0.26085	23.2367	0.0430353	0.199631		1.2467e-06	0.000646055	0.199954	0.0456086		-0.0598447	0.40201	21.9131	0.0456347	0.141179		2.55087e-05	0.00045683	0.141408	1.31974		0.26085	0.26085	23.5639	0.0424378	0.19963		9.80509e-07	0.000646053	0.199954	0.0358705		0.146185	-0.146185	23.2084	0.0430878	0.199631		5.74962e-07	0.000646055	0.199954	0.0210341
						-0.260393	0.260393	23.2361	0.0430365	0.200277		1.2467e-06	0.000646055	0.2006	0.0456086		-0.0593878	0.40201	21.9009	0.0456602	0.141636		2.55087e-05	0.00045683	0.141865	1.31974		0.260393	0.260393	23.5634	0.0424388	0.200277		9.80509e-07	0.000646053	0.2006	0.0358705		0.146642	-0.146642	23.2081	0.0430884	0.200277		5.74962e-07	0.000646055	0.2006	0.0210341
						-0.259936	0.259936	23.2354	0.0430378	0.200923		1.2467e-06	0.000646055	0.201246	0.0456086		-0.058931	0.40201	21.8887	0.0456857	0.142093		2.55087e-05	0.00045683	0.142322	1.31974		0.259936	0.259937	23.5628	0.0424397	0.200923		9.80509e-07	0.000646053	0.201246	0.0358705		0.147099	-0.147099	23.2078	0.043089	0.200923		5.74962e-07	0.000646055	0.201246	0.0210341
						-0.259479	0.259479	23.2347	0.043039	0.201569		1.2467e-06	0.000646055	0.201892	0.0456086		-0.0584742	0.40201	21.8765	0.0457113	0.14255		2.55087e-05	0.00045683	0.142778	1.31974		0.259479	0.25948	23.5623	0.0424407	0.201569		9.80509e-07	0.000646053	0.201892	0.0358705		0.147556	-0.147556	23.2075	0.0430896	0.201569		5.74962e-07	0.000646055	0.201892	0.0210341
						-0.259022	0.259022	23.234	0.0430403	0.202215		1.2467e-06	0.000646055	0.202538	0.0456086		-0.0580174	0.40201	21.8643	0.0457368	0.143007		2.55087e-05	0.00045683	0.143235	1.31974		0.259022	0.259023	23.5617	0.0424417	0.202215		9.78509e-07	0.000646053	0.202538	0.0357973		0.148013	-0.148013	23.2072	0.0430901	0.202215		5.74962e-07	0.000646055	0.202538	0.0210341
						-0.258566	0.258566	23.2334	0.0430415	0.202861		1.2467e-06	0.000646055	0.203184	0.0456086		-0.0575605	0.40201	21.8521	0.0457623	0.143464		2.55087e-05	0.00045683	0.143692	1.31974		0.258566	0.258566	23.5612	0.0424427	0.202861		9.76504e-07	0.000646053	0.203184	0.035724		0.14847	-0.14847	23.2069	0.0430907	0.202861		5.74962e-07	0.000646055	0.203184	0.0210341
						-0.258109	0.258109	23.2327	0.0430428	0.203507		1.2467e-06	0.000646055	0.20383	0.0456086		-0.0571037	0.40201	21.8399	0.0457878	0.14392		2.55087e-05	0.00045683	0.144149	1.31974		0.258109	0.258109	23.5606	0.0424437	0.203507		9.76504e-07	0.000646053	0.20383	0.035724		0.148926	-0.148926	23.2066	0.0430913	0.203507		5.74962e-07	0.000646055	0.20383	0.0210341
						-0.257652	0.257652	23.232	0.043044	0.204153		1.2467e-06	0.000646055	0.204476	0.0456086		-0.0566469	0.40201	21.8277	0.0458133	0.144377		2.55087e-05	0.00045683	0.144606	1.31974		0.257652	0.257652	23.5601	0.0424446	0.204153		9.76504e-07	0.000646053	0.204476	0.035724		0.149383	-0.149383	23.2062	0.0430919	0.204153		5.74962e-07	0.000646055	0.204476	0.0210341
						-0.257195	0.257195	23.2314	0.0430453	0.204799		1.2467e-06	0.000646055	0.205122	0.0456086		-0.05619	0.40201	21.8156	0.0458388	0.144834		2.55087e-05	0.00045683	0.145063	1.31974		0.257195	0.257196	23.5596	0.0424456	0.204799		9.76504e-07	0.000646053	0.205122	0.035724		0.14984	-0.14984	23.2059	0.0430924	0.204799		5.74962e-07	0.000646055	0.205122	0.0210341
						-0.256738	0.256738	23.2307	0.0430465	0.205445		1.2467e-06	0.000646055	0.205768	0.0456086		-0.0557332	0.40201	21.8034	0.0458643	0.145291		2.55087e-05	0.00045683	0.145519	1.31974		0.256738	0.256739	23.559	0.0424466	0.205445		9.76504e-07	0.000646053	0.205768	0.035724		0.150297	-0.150297	23.2056	0.043093	0.205445		5.74962e-07	0.000646055	0.205768	0.0210341
						-0.256281	0.256281	23.23	0.0430478	0.206091		1.14935e-06	0.000646055	0.206414	0.042047		-0.0552764	0.40201	21.7913	0.0458898	0.145748		3.08469e-05	0.00045683	0.145976	1.59592		0.256281	0.256282	23.5585	0.0424476	0.206091		1.02501e-06	0.000646053	0.206414	0.0374986		0.150754	-0.150754	23.2053	0.0430936	0.206091		5.39424e-07	0.000646055	0.206414	0.019734
						-0.255825	0.255825	23.2294	0.0430489	0.206737		1.14935e-06	0.000646055	0.207061	0.042047		-0.0548196	0.40201	21.7767	0.0459207	0.146205		3.08469e-05	0.00045683	0.146433	1.59592		0.255825	0.255825	23.5579	0.0424486	0.206737		1.02504e-06	0.000646053	0.20706	0.0374997		0.151211	-0.151211	23.205	0.0430941	0.206737		5.39424e-07	0.000646055	0.207061	0.019734
						-0.255368	0.255368	23.2288	0.0430501	0.207384		1.14935e-06	0.000646055	0.207707	0.042047		-0.0543627	0.40201	21.7621	0.0459515	0.146661		3.08469e-05	0.00045683	0.14689	1.59592		0.255368	0.255368	23.5573	0.0424496	0.207383		1.02504e-06	0.000646053	0.207706	0.0374997		0.151667	-0.151667	23.2047	0.0430947	0.207384		5.39424e-07	0.000646055	0.207707	0.019734
						-0.254911	0.254911	23.2282	0.0430512	0.20803		1.14935e-06	0.000646055	0.208353	0.042047		-0.0539059	0.40201	21.7475	0.0459824	0.147118		3.08469e-05	0.00045683	0.147347	1.59592		0.254911	0.254911	23.5568	0.0424506	0.208029		1.02504e-06	0.000646053	0.208352	0.0374997		0.152124	-0.152124	23.2044	0.0430952	0.20803		5.39424e-07	0.000646055	0.208353	0.019734
						-0.254454	0.254454	23.2275	0.0430524	0.208676		1.14935e-06	0.000646055	0.208999	0.042047		-0.0534491	0.40201	21.7329	0.0460132	0.147575		3.08469e-05	0.00045683	0.147804	1.59592		0.254454	0.254455	23.5562	0.0424517	0.208675		1.02504e-06	0.000646053	0.208998	0.0374997		0.152581	-0.152581	23.2042	0.0430957	0.208676		5.39424e-07	0.000646055	0.208999	0.019734
						-0.253997	0.253997	23.2269	0.0430535	0.209322		1.14935e-06	0.000646055	0.209645	0.042047		-0.0529922	0.40201	21.7183	0.046044	0.148032		3.08469e-05	0.00045683	0.14826	1.59592		0.253997	0.253998	23.5556	0.0424527	0.209321		1.02193e-06	0.000646053	0.209644	0.0373857		0.153038	-0.153038	23.2039	0.0430963	0.209322		5.39424e-07	0.000646055	0.209645	0.019734
						-0.25354	0.25354	23.2263	0.0430547	0.209968		1.14935e-06	0.000646055	0.210291	0.042047		-0.0525354	0.40201	21.7038	0.0460749	0.148489		3.08469e-05	0.00045683	0.148717	1.59592		0.25354	0.253541	23.5551	0.0424537	0.209967		1.0188e-06	0.000646053	0.21029	0.0372714		0.153495	-0.153495	23.2036	0.0430968	0.209968		5.39424e-07	0.000646055	0.210291	0.019734
						-0.253084	0.253084	23.2257	0.0430558	0.210614		1.14935e-06	0.000646055	0.210937	0.042047		-0.0520786	0.40201	21.6893	0.0461057	0.148946		3.08469e-05	0.00045683	0.149174	1.59592		0.253084	0.253084	23.5545	0.0424547	0.210613		1.0188e-06	0.000646053	0.210936	0.0372714		0.153952	-0.153952	23.2033	0.0430974	0.210614		5.39424e-07	0.000646055	0.210937	0.019734
						-0.252627	0.252627	23.2251	0.043057	0.21126		1.14935e-06	0.000646055	0.211583	0.042047		-0.0516217	0.40201	21.6748	0.0461366	0.149402		3.08469e-05	0.00045683	0.149631	1.59592		0.252627	0.252627	23.5539	0.0424557	0.211259		1.0188e-06	0.000646053	0.211582	0.0372714		0.154408	-0.154408	23.203	0.0430979	0.21126		5.39424e-07	0.000646055	0.211583	0.019734
						-0.25217	0.25217	23.2244	0.0430581	0.211906		1.14935e-06	0.000646055	0.212229	0.042047		-0.0511649	0.40201	21.6603	0.0461674	0.149859		3.08469e-05	0.00045683	0.150088	1.59592		0.25217	0.252171	23.5534	0.0424568	0.211905		1.0188e-06	0.000646053	0.212229	0.0372714		0.154865	-0.154865	23.2027	0.0430984	0.211906		5.39424e-07	0.000646055	0.212229	0.019734
						-0.251713	0.251713	23.2238	0.0430593	0.212552		1.14935e-06	0.000646055	0.212875	0.042047		-0.0507081	0.40201	21.6458	0.0461983	0.150316		3.08469e-05	0.00045683	0.150544	1.59592		0.251713	0.251714	23.5528	0.0424578	0.212552		1.0188e-06	0.000646053	0.212875	0.0372714		0.155322	-0.155322	23.2024	0.043099	0.212552		5.39424e-07	0.000646055	0.212875	0.019734
						-0.251256	0.251256	23.2232	0.0430604	0.213198		1.04897e-06	0.000646055	0.213521	0.038375		-0.0502513	0.40201	21.6314	0.0462291	0.150773		2.93155e-05	0.00045683	0.151001	1.51669		0.251256	0.251257	23.5522	0.0424588	0.213198		1.06779e-06	0.000646053	0.213521	0.0390637		0.155779	-0.155779	23.2021	0.0430995	0.213198		4.98004e-07	0.000646055	0.213521	0.0182187
						-0.250799	0.250799	23.2226	0.0430615	0.213844		1.04897e-06	0.000646055	0.214167	0.038375		-0.0497944	0.40201	21.6177	0.0462584	0.15123		2.93155e-05	0.00045683	0.151458	1.51669		0.250799	0.2508	23.5516	0.0424599	0.213844		1.06783e-06	0.000646052	0.214167	0.0390649		0.156236	-0.156236	23.2019	0.0431	0.213844		4.98004e-07	0.000646055	0.214167	0.0182187
						-0.250343	0.250343	23.2221	0.0430625	0.21449		1.04897e-06	0.000646055	0.214813	0.038375		-0.0493376	0.40201	21.604	0.0462878	0.151687		2.93155e-05	0.00045683	0.151915	1.51669		0.250343	0.250343	23.5511	0.0424609	0.21449		1.06783e-06	0.000646052	0.214813	0.0390649		0.156693	-0.156693	23.2016	0.0431005	0.21449		4.98004e-07	0.000646055	0.214813	0.0182187
						-0.249886	0.249886	23.2215	0.0430636	0.215136		1.04897e-06	0.000646055	0.215459	0.038375		-0.0488808	0.40201	21.5903	0.0463171	0.152143		2.93155e-05	0.00045683	0.152372	1.51669		0.249886	0.249886	23.5505	0.042462	0.215136		1.06783e-06	0.000646052	0.215459	0.0390649		0.157149	-0.157149	23.2013	0.043101	0.215136		4.98004e-07	0.000646055	0.215459	0.0182187
						-0.249429	0.249429	23.2209	0.0430646	0.215782		1.04897e-06	0.000646055	0.216105	0.038375		-0.0484239	0.40201	21.5767	0.0463464	0.1526		2.93155e-05	0.00045683	0.152829	1.51669		0.249429	0.24943	23.5499	0.0424631	0.215782		1.06783e-06	0.000646052	0.216105	0.0390649		0.157606	-0.157606	23.201	0.0431015	0.215782		4.98004e-07	0.000646055	0.216105	0.0182187
						-0.248972	0.248972	23.2204	0.0430657	0.216428		1.04897e-06	0.000646055	0.216751	0.038375		-0.0479671	0.40201	21.563	0.0463757	0.153057		2.93155e-05	0.00045683	0.153285	1.51669		0.248972	0.248973	23.5493	0.0424641	0.216428		1.06352e-06	0.000646052	0.216751	0.0389074		0.158063	-0.158063	23.2008	0.043102	0.216428		4.98004e-07	0.000646055	0.216751	0.0182187
						-0.248515	0.248515	23.2198	0.0430667	0.217074		1.04897e-06	0.000646055	0.217397	0.038375		-0.0475103	0.40201	21.5494	0.046405	0.153514		2.93155e-05	0.00045683	0.153742	1.51669		0.248515	0.248516	23.5487	0.0424652	0.217074		1.05921e-06	0.000646052	0.217397	0.0387495		0.15852	-0.15852	23.2005	0.0431025	0.217074		4.98004e-07	0.000646055	0.217397	0.0182187
						-0.248058	0.248058	23.2192	0.0430677	0.21772		1.04897e-06	0.000646055	0.218043	0.038375		-0.0470534	0.40201	21.5358	0.0464343	0.153971		2.93155e-05	0.00045683	0.154199	1.51669		0.248058	0.248059	23.5481	0.0424663	0.21772		1.05921e-06	0.000646052	0.218043	0.0387495		0.158977	-0.158977	23.2002	0.043103	0.21772		4.98004e-07	0.000646055	0.218043	0.0182187
						-0.247602	0.247602	23.2187	0.0430688	0.218366		1.04897e-06	0.000646055	0.218689	0.038375		-0.0465966	0.40201	21.5222	0.0464637	0.154428		2.93155e-05	0.00045683	0.154656	1.51669		0.247602	0.247602	23.5475	0.0424673	0.218366		1.05921e-06	0.000646052	0.218689	0.0387495		0.159434	-0.159434	23.2	0.0431035	0.218366		4.98004e-07	0.000646055	0.218689	0.0182187
						-0.247145	0.247145	23.2181	0.0430698	0.219013		1.04897e-06	0.000646055	0.219336	0.038375		-0.0461398	0.40201	21.5086	0.046493	0.154884		2.93155e-05	0.00045683	0.155113	1.51669		0.247145	0.247145	23.5469	0.0424684	0.219012		1.05921e-06	0.000646052	0.219335	0.0387495		0.15989	-0.15989	23.1997	0.043104	0.219013		4.98004e-07	0.000646055	0.219336	0.0182187
						-0.246688	0.246688	23.2175	0.0430709	0.219659		1.04897e-06	0.000646055	0.219982	0.038375		-0.045683	0.40201	21.4951	0.0465223	0.155341		2.93155e-05	0.00045683	0.15557	1.51669		0.246688	0.246689	23.5463	0.0424694	0.219658		1.05921e-06	0.000646052	0.219981	0.0387495		0.160347	-0.160347	23.1994	0.0431045	0.219659		4.98004e-07	0.000646055	0.219982	0.0182187
						-0.246231	0.246231	23.217	0.0430719	0.220305		9.46314e-07	0.000646055	0.220628	0.0346194		-0.0452261	0.40201	21.4815	0.0465516	0.155798		7.27973e-05	0.00045683	0.156026	3.7663		0.246231	0.246232	23.5458	0.0424705	0.220304		1.10849e-06	0.000646052	0.220627	0.0405524		0.160804	-0.160804	23.1992	0.043105	0.220305		4.50636e-07	0.000646055	0.220628	0.0164858
						-0.245774	0.245774	23.2165	0.0430729	0.220951		9.46313e-07	0.000646055	0.221274	0.0346194		-0.0447693	0.40201	21.448	0.0466244	0.156255		7.27973e-05	0.00045683	0.156483	3.7663		0.245774	0.245775	23.5451	0.0424716	0.22095		1.10852e-06	0.000646052	0.221273	0.0405536		0.161261	-0.161261	23.1989	0.0431054	0.220951		4.50636e-07	0.000646055	0.221274	0.0164858
						-0.245317	0.245317	23.2159	0.0430738	0.221597		9.46313e-07	0.000646055	0.22192	0.0346194		-0.0443125	0.40201	21.4146	0.0466972	0.156712		7.27973e-05	0.00045683	0.15694	3.7663		0.245317	0.245318	23.5445	0.0424727	0.221596		1.10852e-06	0.000646052	0.221919	0.0405536		0.161718	-0.161718	23.1987	0.0431059	0.221597		4.50636e-07	0.000646055	0.22192	0.0164858
						-0.244861	0.244861	23.2154	0.0430748	0.222243		9.46313e-07	0.000646055	0.222566	0.0346194		-0.0438556	0.40201	21.3812	0.04677	0.157169		7.27973e-05	0.00045683	0.157397	3.7663		0.244861	0.244861	23.5439	0.0424738	0.222242		1.10852e-06	0.000646052	0.222565	0.0405536		0.162175	-0.162174	23.1984	0.0431063	0.222243		4.50636e-07	0.000646055	0.222566	0.0164858
						-0.244404	0.244404	23.2149	0.0430757	0.222889		9.46313e-07	0.000646055	0.223212	0.0346194		-0.0433988	0.40201	21.348	0.0468428	0.157625		7.27973e-05	0.00045683	0.157854	3.7663		0.244404	0.244404	23.5433	0.0424749	0.222888		1.10852e-06	0.000646052	0.223211	0.0405536		0.162631	-0.162631	23.1982	0.0431068	0.222889		4.50636e-07	0.000646055	0.223212	0.0164858
						-0.243947	0.243947	23.2144	0.0430767	0.223535		9.46313e-07	0.000646055	0.223858	0.0346194		-0.042942	0.40201	21.3149	0.0469156	0.158082		7.27973e-05	0.00045683	0.158311	3.7663		0.243947	0.243948	23.5427	0.042476	0.223534		1.10297e-06	0.000646052	0.223857	0.0403505		0.163088	-0.163088	23.198	0.0431072	0.223535		4.50636e-07	0.000646055	0.223858	0.0164858
						-0.24349	0.24349	23.2139	0.0430776	0.224181		9.46313e-07	0.000646055	0.224504	0.0346194		-0.0424852	0.40201	21.2819	0.0469884	0.158539		7.27973e-05	0.00045683	0.158767	3.7663		0.24349	0.243491	23.5421	0.0424771	0.22418		1.0974e-06	0.000646052	0.224504	0.0401468		0.163545	-0.163545	23.1977	0.0431077	0.224181		4.50636e-07	0.000646055	0.224504	0.0164858
						-0.243033	0.243033	23.2134	0.0430786	0.224827		9.46313e-07	0.000646055	0.22515	0.0346194		-0.0420283	0.40201	21.2489	0.0470612	0.158996		7.27973e-05	0.00045683	0.159224	3.7663		0.243033	0.243034	23.5415	0.0424782	0.224827		1.0974e-06	0.000646052	0.22515	0.0401468		0.164002	-0.164002	23.1975	0.0431081	0.224827		4.50636e-07	0.000646055	0.22515	0.0164858
						-0.242577	0.242577	23.2129	0.0430795	0.225473		9.46313e-07	0.000646055	0.225796	0.0346194		-0.0415715	0.40201	21.2161	0.047134	0.159453		7.27973e-05	0.00045683	0.159681	3.7663		0.242577	0.242577	23.5409	0.0424793	0.225473		1.0974e-06	0.000646052	0.225796	0.0401468		0.164459	-0.164459	23.1972	0.0431086	0.225473		4.50636e-07	0.000646055	0.225796	0.0164858
						-0.24212	0.24212	23.2124	0.0430805	0.226119		9.46313e-07	0.000646055	0.226442	0.0346194		-0.0411147	0.40201	21.1834	0.0472068	0.159909		7.27973e-05	0.00045683	0.160138	3.7663		0.24212	0.24212	23.5402	0.0424804	0.226119		1.0974e-06	0.000646052	0.226442	0.0401468		0.164915	-0.164915	23.197	0.043109	0.226119		4.50636e-07	0.000646055	0.226442	0.0164858
						-0.241663	0.241663	23.2119	0.0430814	0.226765		9.46313e-07	0.000646055	0.227088	0.0346194		-0.0406578	0.40201	21.1508	0.0472796	0.160366		7.27973e-05	0.00045683	0.160595	3.7663		0.241663	0.241664	23.5396	0.0424815	0.226765		1.0974e-06	0.000646052	0.227088	0.0401468		0.165372	-0.165372	23.1967	0.0431095	0.226765		4.50636e-07	0.000646055	0.227088	0.0164858
						-0.241206	0.241206	23.2114	0.0430824	0.227411		8.42128e-07	0.000646055	0.227734	0.0308079		-0.040201	0.40201	21.1183	0.0473524	0.160823		1.04161e-05	0.00045683	0.161052	0.538896		0.241206	0.241207	23.539	0.0424826	0.227411		1.14677e-06	0.000646052	0.227734	0.0419529		0.165829	-0.165829	23.1965	0.0431099	0.227411		3.97304e-07	0.000646055	0.227734	0.0145348
						-0.240749	0.240749	23.2109	0.0430832	0.228057		8.42128e-07	0.000646055	0.22838	0.0308079		-0.0397442	0.40201	21.1136	0.0473628	0.16128		1.04161e-05	0.00045683	0.161508	0.538896		0.240749	0.24075	23.5384	0.0424838	0.228057		1.14681e-06	0.000646052	0.22838	0.0419543		0.166286	-0.166286	23.1963	0.0431103	0.228057		3.97304e-07	0.000646055	0.22838	0.0145347
						-0.240292	0.240292	23.2105	0.043084	0.228703		8.42128e-07	0.000646055	0.229026	0.0308079		-0.0392873	0.40201	21.109	0.0473732	0.161737		1.04161e-05	0.00045683	0.161965	0.538896		0.240292	0.240293	23.5378	0.0424849	0.228703		1.14681e-06	0.000646052	0.229026	0.0419543		0.166743	-0.166743	23.1961	0.0431107	0.228703		3.97304e-07	0.000646055	0.229026	0.0145347
						-0.239836	0.239836	23.21	0.0430849	0.229349		8.42128e-07	0.000646055	0.229672	0.0308079		-0.0388305	0.40201	21.1043	0.0473836	0.162194		1.04161e-05	0.00045683	0.162422	0.538896		0.239836	0.239836	23.5371	0.0424861	0.229349		1.14681e-06	0.000646052	0.229672	0.0419543		0.1672	-0.1672	23.1959	0.0431111	0.229349		3.97304e-07	0.000646054	0.229672	0.0145347
						-0.239379	0.239379	23.2095	0.0430857	0.229995		8.42128e-07	0.000646055	0.230318	0.0308079		-0.0383737	0.40201	21.0997	0.047394	0.16265		1.04161e-05	0.00045683	0.162879	0.538896		0.239379	0.239379	23.5365	0.0424872	0.229995		1.14681e-06	0.000646052	0.230318	0.0419543		0.167656	-0.167656	23.1956	0.0431115	0.229995		3.97304e-07	0.000646054	0.230318	0.0145347
						-0.238922	0.238922	23.2091	0.0430866	0.230641		8.42128e-07	0.000646055	0.230965	0.0308079		-0.0379169	0.40201	21.0951	0.0474044	0.163107		1.04161e-05	0.00045683	0.163336	0.538896		0.238922	0.238923	23.5359	0.0424884	0.230641		1.13995e-06	0.000646052	0.230964	0.0417036		0.168113	-0.168113	23.1954	0.0431119	0.230641		3.97304e-07	0.000646054	0.230965	0.0145347
						-0.238465	0.238465	23.2086	0.0430874	0.231288		8.42128e-07	0.000646055	0.231611	0.0308079		-0.03746	0.40201	21.0904	0.0474149	0.163564		1.04161e-05	0.00045683	0.163793	0.538896		0.238465	0.238466	23.5352	0.0424895	0.231287		1.13308e-06	0.000646052	0.23161	0.0414522		0.16857	-0.16857	23.1952	0.0431123	0.231288		3.97304e-07	0.000646054	0.231611	0.0145347
						-0.238008	0.238008	23.2082	0.0430882	0.231934		8.42128e-07	0.000646055	0.232257	0.0308079		-0.0370032	0.40201	21.0858	0.0474253	0.164021		1.04161e-05	0.00045683	0.164249	0.538896		0.238008	0.238009	23.5346	0.0424906	0.231933		1.13308e-06	0.000646052	0.232256	0.0414522		0.169027	-0.169027	23.195	0.0431127	0.231934		3.97304e-07	0.000646054	0.232257	0.0145347
						-0.237551	0.237551	23.2077	0.0430891	0.23258		8.42128e-07	0.000646055	0.232903	0.0308079		-0.0365464	0.40201	21.0812	0.0474357	0.164478		1.04161e-05	0.00045683	0.164706	0.538896		0.237551	0.237552	23.534	0.0424918	0.232579		1.13308e-06	0.000646052	0.232902	0.0414522		0.169484	-0.169484	23.1948	0.0431131	0.23258		3.97304e-07	0.000646054	0.232903	0.0145347
						-0.237095	0.237095	23.2073	0.0430899	0.233226		8.42128e-07	0.000646055	0.233549	0.0308079		-0.0360895	0.40201	21.0765	0.0474461	0.164935		1.04161e-05	0.00045683	0.165163	0.538896		0.237095	0.237095	23.5333	0.0424929	0.233225		1.13308e-06	0.000646052	0.233548	0.0414522		0.169941	-0.169941	23.1946	0.0431135	0.233226		3.97304e-07	0.000646054	0.233549	0.0145347
						-0.236638	0.236638	23.2068	0.0430908	0.233872		8.42128e-07	0.000646055	0.234195	0.0308079		-0.0356327	0.40201	21.0719	0.0474565	0.165391		1.04161e-05	0.00045683	0.16562	0.538896		0.236638	0.236638	23.5327	0.042494	0.233871		1.13308e-06	0.000646052	0.234194	0.0414522		0.170397	-0.170397	23.1944	0.0431139	0.233872		3.97304e-07	0.000646054	0.234195	0.0145347
						-0.236181	0.236181	23.2064	0.0430916	0.234518		7.37174e-07	0.000646055	0.234841	0.0269684		-0.0351759	0.40201	21.0673	0.0474669	0.165848		3.45475e-05	0.00045683	0.166077	1.78738		0.236181	0.236182	23.5321	0.0424952	0.234517		1.18234e-06	0.000646052	0.23484	0.0432544		0.170854	-0.170854	23.1942	0.0431143	0.234518		3.38046e-07	0.000646054	0.234841	0.0123669
						-0.235724	0.235724	23.206	0.0430924	0.235164		7.37174e-07	0.000646055	0.235487	0.0269684		-0.034719	0.40201	21.052	0.0475015	0.166305		3.45475e-05	0.00045683	0.166534	1.78738		0.235724	0.235725	23.5314	0.0424964	0.235163		1.18238e-06	0.000646052	0.235486	0.0432558		0.171311	-0.171311	23.194	0.0431147	0.235164		3.38045e-07	0.000646054	0.235487	0.0123669
						-0.235267	0.235267	23.2056	0.0430931	0.23581		7.37174e-07	0.000646055	0.236133	0.0269684		-0.0342622	0.40201	21.0367	0.047536	0.166762		3.45475e-05	0.00045683	0.16699	1.78738		0.235267	0.235268	23.5308	0.0424975	0.235809		1.18238e-06	0.000646052	0.236132	0.0432558		0.171768	-0.171768	23.1938	0.043115	0.23581		3.38045e-07	0.000646054	0.236133	0.0123669
						-0.23481	0.23481	23.2052	0.0430938	0.236456		7.37174e-07	0.000646055	0.236779	0.0269684		-0.0338054	0.40201	21.0214	0.0475706	0.167219		3.45475e-05	0.00045683	0.167447	1.78738		0.23481	0.234811	23.5301	0.0424987	0.236455		1.18238e-06	0.000646052	0.236779	0.0432558		0.172225	-0.172225	23.1936	0.0431153	0.236456		3.38045e-07	0.000646054	0.236779	0.0123669
						-0.234354	0.234354	23.2048	0.0430946	0.237102		7.37174e-07	0.000646055	0.237425	0.0269684		-0.0333486	0.40201	21.0061	0.0476051	0.167676		3.45475e-05	0.00045683	0.167904	1.78738		0.234354	0.234354	23.5295	0.0424999	0.237102		1.18238e-06	0.000646052	0.237425	0.0432558		0.172682	-0.172682	23.1934	0.0431157	0.237102		3.38045e-07	0.000646054	0.237425	0.0123669
						-0.233897	0.233897	23.2044	0.0430953	0.237748		7.37174e-07	0.000646055	0.238071	0.0269684		-0.0328917	0.40201	20.9909	0.0476397	0.168132		3.45475e-05	0.00045683	0.168361	1.78738		0.233897	0.233897	23.5288	0.0425011	0.237748		1.17419e-06	0.000646052	0.238071	0.0429561		0.173138	-0.173138	23.1932	0.043116	0.237748		3.38045e-07	0.000646054	0.238071	0.0123669
						-0.23344	0.23344	23.204	0.043096	0.238394		7.37174e-07	0.000646055	0.238717	0.0269684		-0.0324349	0.40201	20.9757	0.0476742	0.168589		3.45475e-05	0.00045683	0.168818	1.78738		0.23344	0.233441	23.5282	0.0425023	0.238394		1.16597e-06	0.000646052	0.238717	0.0426555		0.173595	-0.173595	23.1931	0.0431163	0.238394		3.38045e-07	0.000646054	0.238717	0.0123669
						-0.232983	0.232983	23.2036	0.0430968	0.23904		7.37174e-07	0.000646055	0.239363	0.0269684		-0.0319781	0.40201	20.9605	0.0477088	0.169046		3.45475e-05	0.00045683	0.169274	1.78738		0.232983	0.232984	23.5275	0.0425034	0.23904		1.16597e-06	0.000646052	0.239363	0.0426555		0.174052	-0.174052	23.1929	0.0431167	0.23904		3.38045e-07	0.000646054	0.239363	0.0123669
						-0.232526	0.232526	23.2032	0.0430975	0.239686		7.37174e-07	0.000646055	0.240009	0.0269684		-0.0315212	0.40201	20.9453	0.0477433	0.169503		3.45475e-05	0.00045683	0.169731	1.78738		0.232526	0.232527	23.5269	0.0425046	0.239686		1.16597e-06	0.000646052	0.240009	0.0426555		0.174509	-0.174509	23.1927	0.043117	0.239686		3.38045e-07	0.000646054	0.240009	0.0123669
						-0.232069	0.232069	23.2028	0.0430983	0.240332		7.37174e-07	0.000646055	0.240655	0.0269684		-0.0310644	0.40201	20.9302	0.0477779	0.16996		3.45475e-05	0.00045683	0.170188	1.78738		0.232069	0.23207	23.5262	0.0425058	0.240332		1.16597e-06	0.000646052	0.240655	0.0426555		0.174966	-0.174966	23.1925	0.0431174	0.240332		3.38045e-07	0.000646054	0.240655	0.0123669
						-0.231613	0.231613	23.2024	0.043099	0.240978		7.37174e-07	0.000646055	0.241301	0.0269684		-0.0306076	0.40201	20.9151	0.0478124	0.170417		3.45475e-05	0.00045683	0.170645	1.78738		0.231613	0.231613	23.5256	0.0425069	0.240978		1.16597e-06	0.000646052	0.241301	0.0426555		0.175423	-0.175423	23.1923	0.0431177	0.240978		3.38045e-07	0.000646054	0.241301	0.0123669
						-0.231156	0.231156	23.202	0.0430997	0.241624		6.32209e-07	0.000646055	0.241947	0.0231284		-0.0301508	0.40201	20.9	0.047847	0.170873		0.000350171	0.00045683	0.171102	18.1168		0.231156	0.231157	23.5249	0.0425081	0.241624		1.21493e-06	0.000646052	0.241947	0.0444465		0.175879	-0.175879	23.1922	0.043118	0.241624		2.72958e-07	0.000646054	0.241947	0.00998574
						-0.230699	0.230699	23.2017	0.0431004	0.24227		6.32209e-07	0.000646055	0.242594	0.0231284		-0.0296939	0.40201	20.7481	0.0481971	0.17133		0.000350171	0.00045683	0.171559	18.1168		0.230699	0.2307	23.5243	0.0425093	0.24227		1.21497e-06	0.000646052	0.242593	0.044448		0.176336	-0.176336	23.192	0.0431183	0.24227		2.72957e-07	0.000646054	0.242593	0.0099857
						-0.230242	0.230242	23.2013	0.043101	0.242917		6.32209e-07	0.000646055	0.24324	0.0231284		-0.0292371	0.40201	20.5985	0.0485473	0.171787		0.000350171	0.00045683	0.172015	18.1168		0.230242	0.230243	23.5236	0.0425105	0.242916		1.21497e-06	0.000646052	0.243239	0.044448		0.176793	-0.176793	23.1919	0.0431186	0.242917		2.72957e-07	0.000646054	0.24324	0.0099857
						-0.229785	0.229785	23.201	0.0431016	0.243563		6.32209e-07	0.000646055	0.243886	0.0231284		-0.0287803	0.40201	20.451	0.0488975	0.172244		0.000350171	0.00045683	0.172472	18.1168		0.229785	0.229786	23.5229	0.0425117	0.243562		1.21497e-06	0.000646052	0.243885	0.044448		0.17725	-0.17725	23.1917	0.0431189	0.243563		2.72957e-07	0.000646054	0.243886	0.0099857
						-0.229328	0.229328	23.2006	0.0431023	0.244209		6.32209e-07	0.000646055	0.244532	0.0231284		-0.0283234	0.40201	20.3055	0.0492477	0.172701		0.000350171	0.00045683	0.172929	18.1168		0.229328	0.229329	23.5222	0.042513	0.244208		1.21497e-06	0.000646052	0.244531	0.044448		0.177707	-0.177707	23.1916	0.0431191	0.244209		2.72957e-07	0.000646054	0.244532	0.0099857
						-0.228872	0.228872	23.2003	0.0431029	0.244855		6.32209e-07	0.000646055	0.245178	0.0231284		-0.0278666	0.40201	20.1622	0.0495978	0.173158		0.000350171	0.00045683	0.173386	18.1168		0.228872	0.228872	23.5216	0.0425142	0.244854		1.20541e-06	0.000646052	0.245177	0.0440982		0.178164	-0.178164	23.1914	0.0431194	0.244855		2.72957e-07	0.000646054	0.245178	0.0099857
						-0.228415	0.228415	23.2	0.0431035	0.245501		6.32209e-07	0.000646055	0.245824	0.0231284		-0.0274098	0.40201	20.0208	0.049948	0.173614		0.000350171	0.00045683	0.173843	18.1168		0.228415	0.228416	23.5209	0.0425154	0.2455		1.19581e-06	0.000646052	0.245823	0.0437472		0.17862	-0.17862	23.1913	0.0431197	0.245501		2.72957e-07	0.000646054	0.245824	0.0099857
						-0.227958	0.227958	23.1996	0.0431042	0.246147		6.32209e-07	0.000646055	0.24647	0.0231284		-0.0269529	0.40201	19.8814	0.0502982	0.174071		0.000350171	0.00045683	0.1743	18.1168		0.227958	0.227959	23.5202	0.0425166	0.246146		1.19581e-06	0.000646052	0.246469	0.0437472		0.179077	-0.179077	23.1911	0.0431199	0.246147		2.72957e-07	0.000646054	0.24647	0.0099857
						-0.227501	0.227501	23.1993	0.0431048	0.246793		6.32209e-07	0.000646055	0.247116	0.0231284		-0.0264961	0.40201	19.744	0.0506483	0.174528		0.000350171	0.00045683	0.174756	18.1168		0.227501	0.227502	23.5196	0.0425178	0.246792		1.19581e-06	0.000646052	0.247115	0.0437472		0.179534	-0.179534	23.191	0.0431202	0.246793		2.72957e-07	0.000646054	0.247116	0.0099857
						-0.227044	0.227044	23.1989	0.0431054	0.247439		6.32209e-07	0.000646055	0.247762	0.0231284		-0.0260393	0.40201	19.6084	0.0509985	0.174985		0.000350171	0.00045683	0.175213	18.1168		0.227044	0.227045	23.5189	0.042519	0.247438		1.19581e-06	0.000646052	0.247761	0.0437472		0.179991	-0.179991	23.1908	0.0431205	0.247439		2.72957e-07	0.000646054	0.247762	0.0099857
						-0.226587	0.226587	23.1986	0.043106	0.248085		6.32209e-07	0.000646055	0.248408	0.0231284		-0.0255825	0.40201	19.4747	0.0513487	0.175442		0.000350171	0.00045683	0.17567	18.1168		0.226587	0.226588	23.5183	0.0425202	0.248084		1.19581e-06	0.000646052	0.248407	0.0437472		0.180448	-0.180448	23.1907	0.0431208	0.248085		2.72957e-07	0.000646054	0.248408	0.0099857
						-0.226131	0.226131	23.1983	0.0431067	0.248731		5.27975e-07	0.000646055	0.249054	0.0193152		-0.0251256	0.40201	19.3428	0.0516989	0.175899		5.06733e-06	0.00045683	0.176127	0.262168		0.226131	0.226131	23.5176	0.0425213	0.24873		1.24428e-06	0.000646052	0.249053	0.0455201		0.180905	-0.180905	23.1905	0.043121	0.248731		2.02196e-07	0.000646054	0.249054	0.00739705
						-0.225674	0.225674	23.198	0.0431072	0.249377		5.27975e-07	0.000646055	0.2497	0.0193151		-0.0246688	0.40201	19.3409	0.0517039	0.176355		5.06733e-06	0.00045683	0.176584	0.262168		0.225674	0.225675	23.5169	0.0425226	0.249377		1.24432e-06	0.000646052	0.2497	0.0455216		0.181361	-0.181361	23.1904	0.0431212	0.249377		2.02195e-07	0.000646054	0.2497	0.00739699
						-0.225217	0.225217	23.1977	0.0431077	0.250023		5.27975e-07	0.000646055	0.250346	0.0193151		-0.024212	0.40201	19.339	0.051709	0.176812		5.06733e-06	0.00045683	0.177041	0.262168		0.225217	0.225218	23.5162	0.0425238	0.250023		1.24432e-06	0.000646052	0.250346	0.0455216		0.181818	-0.181818	23.1903	0.0431214	0.250023		2.02195e-07	0.000646054	0.250346	0.00739699
						-0.22476	0.22476	23.1974	0.0431083	0.250669		5.27975e-07	0.000646055	0.250992	0.0193151		-0.0237551	0.40201	19.3371	0.0517141	0.177269		5.06733e-06	0.00045683	0.177497	0.262168		0.22476	0.224761	23.5155	0.0425251	0.250669		1.24432e-06	0.000646052	0.250992	0.0455216		0.182275	-0.182275	23.1902	0.0431216	0.250669		2.02195e-07	0.000646054	0.250992	0.00739699
						-0.224303	0.224303	23.1971	0.0431088	0.251315		5.27975e-07	0.000646055	0.251638	0.0193151		-0.0232983	0.40201	19.3352	0.0517191	0.177726		5.06733e-06	0.00045683	0.177954	0.262168		0.224303	0.224304	23.5148	0.0425263	0.251315		1.24432e-06	0.000646052	0.251638	0.0455216		0.182732	-0.182732	23.1901	0.0431218	0.251315		2.02195e-07	0.000646054	0.251638	0.00739699
						-0.223847	0.223847	23.1968	0.0431093	0.251961		5.27975e-07	0.000646055	0.252284	0.0193151		-0.0228415	0.40201	19.3333	0.0517242	0.178183		5.06733e-06	0.00045683	0.178411	0.262168		0.223847	0.223847	23.5142	0.0425276	0.251961		1.23337e-06	0.000646052	0.252284	0.0451211		0.183189	-0.183189	23.19	0.0431221	0.251961		2.02195e-07	0.000646054	0.252284	0.00739699
						-0.22339	0.22339	23.1966	0.0431098	0.252607		5.27975e-07	0.000646055	0.25293	0.0193151		-0.0223847	0.40201	19.3314	0.0517293	0.178639		5.06733e-06	0.00045683	0.178868	0.262168		0.22339	0.22339	23.5135	0.0425288	0.252607		1.22238e-06	0.000646052	0.25293	0.0447191		0.183646	-0.183645	23.1899	0.0431223	0.252607		2.02195e-07	0.000646054	0.25293	0.00739699
						-0.222933	0.222933	23.1963	0.0431104	0.253253		5.27975e-07	0.000646055	0.253576	0.0193151		-0.0219278	0.40201	19.3295	0.0517343	0.179096		5.06733e-06	0.00045683	0.179325	0.262168		0.222933	0.222934	23.5128	0.04253	0.253253		1.22238e-06	0.000646052	0.253576	0.0447191		0.184102	-0.184102	23.1898	0.0431225	0.253253		2.02195e-07	0.000646054	0.253576	0.00739699
						-0.222476	0.222476	23.196	0.0431109	0.253899		5.27975e-07	0.000646055	0.254222	0.0193151		-0.021471	0.40201	19.3276	0.0517394	0.179553		9.17626e-07	0.00045683	0.179782	0.047475		0.222476	0.222477	23.5121	0.0425312	0.253899		1.22238e-06	0.000646052	0.254222	0.0447191		0.184559	-0.184559	23.1897	0.0431227	0.253899		2.02195e-07	0.000646054	0.254222	0.00739699
						-0.222019	0.222019	23.1957	0.0431114	0.254546		5.27975e-07	0.000646055	0.254869	0.0193151		-0.0210142	0.40201	19.3273	0.0517403	0.18001		0	0.00045683	0.180238	0		0.222019	0.22202	23.5114	0.0425325	0.254545		1.22238e-06	0.000646052	0.254868	0.0447191		0.185016	-0.185016	23.1896	0.0431229	0.254546		2.02195e-07	0.000646054	0.254869	0.00739699
						-0.221562	0.221562	23.1954	0.043112	0.255192		5.27975e-07	0.000646055	0.255515	0.0193151		-0.0205573	0.40201	19.3273	0.0517403	0.180467		0	0.00045683	0.180695	0		0.221562	0.221563	23.5108	0.0425337	0.255191		1.22238e-06	0.000646052	0.255514	0.0447191		0.185473	-0.185473	23.1894	0.0431231	0.255192		2.02195e-07	0.000646054	0.255515	0.00739699
						-0.221106	0.221106	23.1951	0.0431125	0.255838		4.25191e-07	0.000646055	0.256161	0.015555		-0.0201005	0.40201	19.3273	0.0517403	0.180924		0	0.00045683	0.181152	0		0.221106	0.221106	23.5101	0.0425349	0.255837		1.27016e-06	0.000646052	0.25616	0.046467		0.18593	-0.18593	23.1893	0.0431233	0.255838		1.25984e-07	0.000646054	0.256161	0.00460893
						-0.220649	0.220649	23.1949	0.0431129	0.256484		4.25191e-07	0.000646055	0.256807	0.0155549		-0.0196437	0.40201	19.3273	0.0517403	0.18138		0	0.00045683	0.181609	0		0.220649	0.22065	23.5094	0.0425362	0.256483		1.2702e-06	0.000646051	0.256806	0.0464686		0.186386	-0.186386	23.1893	0.0431234	0.256484		1.25981e-07	0.000646054	0.256807	0.00460884
						-0.220192	0.220192	23.1947	0.0431133	0.25713		4.25191e-07	0.000646055	0.257453	0.0155549		-0.0191868	0.40201	19.3273	0.0517403	0.181837		0	0.00045683	0.182066	0		0.220192	0.220193	23.5087	0.0425375	0.257129		1.2702e-06	0.000646051	0.257452	0.0464686		0.186843	-0.186843	23.1892	0.0431235	0.25713		1.25981e-07	0.000646054	0.257453	0.00460884
						-0.219735	0.219735	23.1944	0.0431138	0.257776		4.25191e-07	0.000646055	0.258099	0.0155549		-0.01873	0.40201	19.3273	0.0517403	0.182294		0	0.00045683	0.182523	0		0.219735	0.219736	23.508	0.0425387	0.257775		1.2702e-06	0.000646051	0.258098	0.0464686		0.1873	-0.1873	23.1891	0.0431236	0.257776		1.25981e-07	0.000646053	0.258099	0.00460884
						-0.219278	0.219278	23.1942	0.0431142	0.258422		4.25191e-07	0.000646055	0.258745	0.0155549		-0.0182732	0.40201	19.3273	0.0517403	0.182751		0	0.00045683	0.182979	0		0.219278	0.219279	23.5073	0.04254	0.258421		1.2702e-06	0.000646051	0.258744	0.0464686		0.187757	-0.187757	23.1891	0.0431238	0.258422		1.25981e-07	0.000646053	0.258745	0.00460884
						-0.218821	0.218821	23.194	0.0431146	0.259068		4.25191e-07	0.000646055	0.259391	0.0155549		-0.0178164	0.40201	19.3273	0.0517403	0.183208		0	0.00045683	0.183436	0		0.218821	0.218822	23.5066	0.0425413	0.259067		1.25786e-06	0.000646051	0.25939	0.0460171		0.188214	-0.188214	23.189	0.0431239	0.259068		1.25981e-07	0.000646053	0.259391	0.00460884
						-0.218365	0.218365	23.1938	0.043115	0.259714		4.25191e-07	0.000646055	0.260037	0.0155549		-0.0173595	0.40201	19.3273	0.0517403	0.183665		0	0.00228415	0.184807	0		0.218365	0.218365	23.5059	0.0425425	0.259713		1.24547e-06	0.000646051	0.260036	0.0455639		0.188671	-0.188671	23.1889	0.043124	0.259714		1.25981e-07	0.000646053	0.260037	0.00460884
						-0.217908	0.217908	23.1935	0.0431155	0.26036		4.25191e-07	0.000646055	0.260683	0.0155549		-0.0150754	0.40201	19.3273	0.0517403	0.185949							0.217908	0.217909	23.5052	0.0425438	0.260359		1.24547e-06	0.000646051	0.260682	0.0455639		0.189127	-0.189127	23.1889	0.0431241	0.26036		1.25981e-07	0.000646053	0.260683	0.00460884
						-0.217451	0.217451	23.1933	0.0431159	0.261006		4.25191e-07	0.000646054	0.261329	0.0155549													0.217451	0.217452	23.5045	0.042545	0.261005		1.24547e-06	0.000646051	0.261328	0.0455639		0.189584	-0.189584	23.1888	0.0431243	0.261006		1.25981e-07	0.000646053	0.261329	0.00460884
						-0.216994	0.216994	23.1931	0.0431163	0.261652		4.25191e-07	0.000646054	0.261975	0.0155549													0.216994	0.216995	23.5038	0.0425463	0.261651		1.24547e-06	0.000646051	0.261975	0.0455639		0.190041	-0.190041	23.1887	0.0431244	0.261652		1.25981e-07	0.000646052	0.261975	0.00460884
						-0.216537	0.216537	23.1928	0.0431167	0.262298		4.25191e-07	0.000646054	0.262621	0.0155549													0.216537	0.216538	23.5031	0.0425475	0.262298		1.24547e-06	0.000646051	0.262621	0.0455639		0.190498	-0.190498	23.1887	0.0431245	0.262298		1.25981e-07	0.000646052	0.262621	0.00460884
						-0.21608	0.21608	23.1926	0.0431172	0.262944		3.24542e-07	0.000646054	0.263267	0.0118729													0.21608	0.216081	23.5025	0.0425488	0.262944		1.29239e-06	0.000646051	0.263267	0.0472804		0.190955	-0.190955	23.1886	0.0431246	0.262944		4.46081e-08	0.000646051	0.263267	0.00163192
						-0.215624	0.215624	23.1924	0.0431175	0.26359		3.24541e-07	0.000646054	0.263913	0.0118728													0.215624	0.215624	23.5017	0.04255	0.26359		1.29244e-06	0.000646051	0.263913	0.0472821		0.191412	-0.191412	23.1886	0.0431247	0.26359		4.46031e-08	0.000646051	0.263913	0.00163174
						-0.215167	0.215167	23.1923	0.0431178	0.264236		3.24541e-07	0.000646054	0.264559	0.0118728													0.215167	0.215168	23.501	0.0425513	0.264236		1.29244e-06	0.000646051	0.264559	0.0472821		0.191868	-0.191868	23.1885	0.0431247	0.264236		4.46031e-08	0.00064605	0.264559	0.00163175
						-0.21471	0.21471	23.1921	0.0431181	0.264882		3.24541e-07	0.000646054	0.265205	0.0118728													0.21471	0.214711	23.5003	0.0425526	0.264882		1.29244e-06	0.000646051	0.265205	0.0472821		0.192325	-0.192325	23.1885	0.0431248	0.264882		4.46031e-08	0.000646049	0.265205	0.00163175
						-0.214253	0.214253	23.1919	0.0431185	0.265528		3.24541e-07	0.000646054	0.265851	0.0118728													0.214253	0.214254	23.4996	0.0425539	0.265528		1.29244e-06	0.000646051	0.265851	0.0472821		0.192782	-0.192782	23.1885	0.0431248	0.265528		4.4603e-08	0.000646047	0.265851	0.00163175
						-0.213796	0.213796	23.1917	0.0431188	0.266174		3.24541e-07	0.000646054	0.266498	0.0118728													0.213796	0.213797	23.4989	0.0425552	0.266174		1.27871e-06	0.000646051	0.266497	0.0467798		0.193239	-0.193239	23.1885	0.0431249	0.266174		4.4603e-08	0.000646045	0.266497	0.00163176
						-0.213339	0.213339	23.1916	0.0431191	0.266821		3.24541e-07	0.000646054	0.267144	0.0118728													0.213339	0.21334	23.4982	0.0425565	0.26682		1.26492e-06	0.000646051	0.267143	0.0462755		0.193696	-0.193696	23.1885	0.0431249	0.26682		4.4603e-08	0.000646041	0.267144	0.00163177
						-0.212883	0.212883	23.1914	0.0431194	0.267467		3.24541e-07	0.000646054	0.26779	0.0118728													0.212883	0.212884	23.4975	0.0425578	0.267466		1.26492e-06	0.000646051	0.267789	0.0462755		0.194153	-0.194152	23.1884	0.043125	0.267467		4.4603e-08	0.000646035	0.26779	0.00163178
						-0.212426	0.212426	23.1912	0.0431198	0.268113		3.24541e-07	0.000646054	0.268436	0.0118728													0.212426	0.212427	23.4968	0.042559	0.268112		1.26492e-06	0.000646051	0.268435	0.0462755		0.194609	-0.194609	23.1884	0.043125	0.268113		4.4603e-08	0.000646023	0.268436	0.00163181
						-0.211969	0.211969	23.191	0.0431201	0.268759		3.24541e-07	0.000646054	0.269082	0.0118728													0.211969	0.21197	23.4961	0.0425603	0.268758		1.26492e-06	0.000646051	0.269081	0.0462755		0.195066	-0.195066	23.1884	0.0431251	0.268759		4.46028e-08	0.000645996	0.269082	0.00163187
						-0.211512	0.211512	23.1909	0.0431204	0.269405		3.24541e-07	0.000646054	0.269728	0.0118728													0.211512	0.211513	23.4954	0.0425616	0.269404		1.26492e-06	0.000646051	0.269727	0.0462755		0.195523	-0.195523	23.1884	0.0431251	0.269405		4.46025e-08	0.000645911	0.269728	0.00163208
						-0.211055	0.211055	23.1907	0.0431207	0.270051		2.26671e-07	0.000646054	0.270374	0.00829241													0.211055	0.211056	23.4947	0.0425628	0.27005		1.31082e-06	0.000646051	0.270373	0.0479546		0.19598	-0.195979	23.1883	0.0431251	0.27005		-4.14125e-08	0.000645095	0.270373	-0.00151727
						-0.210598	0.210598	23.1906	0.043121	0.270697		2.2667e-07	0.000646054	0.27102	0.00829237													0.210598	0.210599	23.494	0.0425641	0.270696		1.31087e-06	0.000646051	0.271019	0.0479563		0.196437	-0.196435	23.1884	0.0431251	0.270696		4.14178e-08	0.000643998	0.271018	0.00152004
						-0.210142	0.210142	23.1905	0.0431212	0.271343		2.2667e-07	0.000646054	0.271666	0.00829237													0.210142	0.210143	23.4932	0.0425654	0.271342		1.31087e-06	0.000646051	0.271665	0.0479563		0.195983	-0.195978	23.1883	0.0431251	0.27134		-4.0115e-08	0.000636414	0.271658	-0.00148977
						-0.209685	0.209685	23.1903	0.0431214	0.271989		2.2667e-07	0.000646054	0.272312	0.00829237													0.209685	0.209686	23.4925	0.0425668	0.271988		1.31087e-06	0.000646051	0.272311	0.0479563		0.19644	-0.196421	23.1884	0.0431251	0.271976		4.0167e-08	0.000625924	0.272289	0.00151671
						-0.209228	0.209228	23.1902	0.0431216	0.272635		2.2667e-07	0.000646054	0.272958	0.00829237													0.209228	0.209229	23.4918	0.0425681	0.272634		1.31087e-06	0.000646051	0.272957	0.0479563		0.196012	-0.195964	23.1883	0.0431251	0.272602		-2.81765e-08	0.000563823	0.272884	-0.00118113
						-0.208771	0.208771	23.1901	0.0431219	0.273281		2.2667e-07	0.000646054	0.273604	0.00829237													0.208771	0.208772	23.4911	0.0425694	0.27328		1.29577e-06	0.000646051	0.273603	0.047404		0.196469	-0.196295	23.1883	0.0431251	0.273166		2.85923e-08	0.00050299	0.273417	0.00134352
						-0.208314	0.208314	23.19	0.0431221	0.273927		2.2667e-07	0.000646054	0.27425	0.00829237													0.208314	0.208315	23.4904	0.0425707	0.273926		1.28061e-06	0.000646051	0.274249	0.0468493		0.196258	-0.195838	23.1883	0.0431251	0.273669		9.11688e-10	0.000492651	0.273915	4.37382e-05
						-0.207857	0.207857	23.1898	0.0431223	0.274573		2.2667e-07	0.000646054	0.274896	0.00829237													0.207857	0.207858	23.4896	0.0425719	0.274573		1.28061e-06	0.000646051	0.274896	0.0468493		0.196715	-0.195654	23.1883	0.0431251	0.274161		-7.08284e-11	0.00059935	0.274461	-2.79306e-06
						-0.207401	0.207401	23.1897	0.0431225	0.275219		2.2667e-07	0.000646054	0.275542	0.00829237													0.207401	0.207402	23.4889	0.0425732	0.275219		1.28061e-06	0.000646051	0.275542	0.0468493		0.197103	-0.195197	23.1883	0.0431251	0.274761		1.28654e-10	0.000642415	0.275082	4.73329e-06
						-0.206944	0.206944	23.1896	0.0431228	0.275865		2.2667e-07	0.000646054	0.276188	0.00829237													0.206944	0.206945	23.4882	0.0425745	0.275865		1.28061e-06	0.000646051	0.276188	0.0468493		0.197555	-0.19474	23.1883	0.0431251	0.275403		1.51464e-10	0.000644389	0.275725	5.5554e-06
						-0.206487	0.206487	23.1895	0.043123	0.276511		2.2667e-07	0.000646054	0.276834	0.00829237													0.206487	0.206488	23.4875	0.0425758	0.276511		1.28061e-06	0.000646051	0.276834	0.0468493		0.198011	-0.194285	23.1883	0.0431251	0.276048		1.60336e-10	0.00064217	0.276369	5.90113e-06
						-0.20603	0.20603	23.1894	0.0431232	0.277157		1.32173e-07	0.000646054	0.27748	0.00483536													0.20603	0.206031	23.4868	0.0425771	0.277157		1.32533e-06	0.000646051	0.27748	0.0484852		0.198468	-0.193834	23.1883	0.0431251	0.27669		4.89604e-08	0.000640641	0.27701	0.00180628
						-0.205573	0.205573	23.1893	0.0431234	0.277803		1.32172e-07	0.000646054	0.278127	0.00483531													0.205573	0.205574	23.4861	0.0425784	0.277803		1.32537e-06	0.000646051	0.278126	0.048487		0.198925	-0.193385	23.1883	0.0431252	0.27733		8.58346e-08	0.000639352	0.27765	0.00317305
						-0.205117	0.205116	23.1892	0.0431235	0.27845		1.32172e-07	0.000646054	0.278773	0.00483531													0.205116	0.205118	23.4854	0.0425797	0.278449		1.32537e-06	0.000646051	0.278772	0.048487		0.199382	-0.192938	23.1883	0.0431253	0.27797		8.56793e-08	0.000638171	0.278289	0.00317317
						-0.20466	0.20466	23.1891	0.0431236	0.279096		1.32172e-07	0.000646054	0.279419	0.00483531													0.20466	0.204661	23.4846	0.042581	0.279095		1.32537e-06	0.000646051	0.279418	0.048487		0.199839	-0.192492	23.1882	0.0431254	0.278608		8.55314e-08	0.000637049	0.278926	0.00317327
						-0.204203	0.204203	23.1891	0.0431238	0.279742		1.32172e-07	0.000646054	0.280065	0.00483531													0.204203	0.204204	23.4839	0.0425824	0.279741		1.32537e-06	0.000646051	0.280064	0.048487		0.200296	-0.192048	23.1882	0.0431254	0.279245		8.5388e-08	0.000635962	0.279563	0.00317336
						-0.203746	0.203746	23.189	0.0431239	0.280388		1.32172e-07	0.000646054	0.280711	0.00483531													0.203746	0.203747	23.4832	0.0425837	0.280387		1.30894e-06	0.000646051	0.28071	0.0478858		0.200752	-0.191606	23.1881	0.0431255	0.279881		6.65489e-08	0.0006349	0.280198	0.00247736
						-0.203289	0.203289	23.1889	0.043124	0.281034		1.32172e-07	0.000646054	0.281357	0.00483531													0.203289	0.20329	23.4824	0.042585	0.281033		1.29243e-06	0.000646051	0.281356	0.0472818		0.201209	-0.191165	23.1881	0.0431256	0.280516		1.06546e-07	0.000633871	0.280833	0.00397274
						-0.202832	0.202832	23.1889	0.0431242	0.28168		1.32172e-07	0.000646053	0.282003	0.00483531													0.202832	0.202833	23.4817	0.0425863	0.281679		1.29243e-06	0.000646051	0.282002	0.0472818		0.201666	-0.190725	23.188	0.0431257	0.28115		8.54185e-08	0.000632795	0.281466	0.00319038
						-0.202376	0.202376	23.1888	0.0431243	0.282326		1.32172e-07	0.000646053	0.282649	0.00483531													0.202376	0.202377	23.481	0.0425876	0.282325		1.29243e-06	0.000646051	0.282648	0.0472818		0.202123	-0.190287	23.188	0.0431258	0.281782		8.52775e-08	0.000631671	0.282098	0.00319078
						-0.201919	0.201919	23.1887	0.0431244	0.282972		1.32172e-07	0.000646053	0.283295	0.00483531													0.201919	0.20192	23.4803	0.0425889	0.282971		1.29243e-06	0.000646051	0.283294	0.0472818		0.20258	-0.189851	23.1879	0.0431259	0.282414		8.51404e-08	0.000630581	0.282729	0.00319116
						-0.201462	0.201462	23.1886	0.0431246	0.283618		1.32172e-07	0.000646053	0.283941	0.00483531													0.201462	0.201463	23.4796	0.0425902	0.283617		1.29243e-06	0.000646051	0.28394	0.0472818		0.203037	-0.189416	23.1879	0.043126	0.283045		8.50063e-08	0.000629517	0.283359	0.00319152
						-0.201005	0.201005	23.1886	0.0431247	0.284264		4.15904e-08	0.000646052	0.284587	0.00152153													0.201005	0.201006	23.4789	0.0425915	0.284263		1.33583e-06	0.000646051	0.284586	0.0488695		0.203493	-0.188983	23.1878	0.043126	0.283674		1.15615e-07	0.000628474	0.283988	0.00434792
						-0.200548	0.200548	23.1886	0.0431247	0.28491		4.15873e-08	0.000646052	0.285233	0.00152141													0.200548	0.200549	23.4781	0.0425928	0.284909		1.33588e-06	0.000646051	0.285232	0.0488714		0.20395	-0.188552	23.1878	0.0431262	0.284303		1.6913e-07	0.000627449	0.284616	0.00637083
						-0.200091	0.200091	23.1885	0.0431248	0.285556		4.15873e-08	0.000646051	0.285879	0.00152141													0.200091	0.200092	23.4774	0.0425941	0.285555		1.33588e-06	0.000646051	0.285878	0.0488714		0.204407	-0.188122	23.1877	0.0431263	0.28493		1.68862e-07	0.00062644	0.285243	0.00637098
						-0.199635	0.199635	23.1885	0.0431248	0.286202		4.15873e-08	0.00064605	0.286525	0.00152142													0.199635	0.199636	23.4767	0.0425955	0.286201		1.33588e-06	0.00064605	0.286524	0.0488714		0.204864	-0.187693	23.1876	0.0431265	0.285557		1.68597e-07	0.000625444	0.285869	0.00637111
						-0.199178	0.199178	23.1885	0.0431248	0.286848		4.15873e-08	0.000646049	0.287171	0.00152142													0.199178	0.199179	23.4759	0.0425968	0.286847		1.33588e-06	0.00064605	0.287171	0.0488714		0.205321	-0.187266	23.1875	0.0431267	0.286182		1.68335e-07	0.00062446	0.286494	0.00637122
						-0.198721	0.198721	23.1885	0.0431249	0.287494		4.15873e-08	0.000646047	0.287817	0.00152143													0.198721	0.198722	23.4752	0.0425981	0.287494		1.31815e-06	0.00064605	0.287817	0.0482227		0.205778	-0.18684	23.1874	0.0431268	0.286806		1.50434e-07	0.000623488	0.287118	0.00570258
						-0.198264	0.198264	23.1884	0.0431249	0.28814		4.15873e-08	0.000646044	0.288463	0.00152143													0.198264	0.198265	23.4745	0.0425995	0.28814		1.30033e-06	0.00064605	0.288463	0.047571		0.206234	-0.186416	23.1873	0.043127	0.28743		1.87036e-07	0.000622555	0.287741	0.0071007
						-0.197807	0.197807	23.1884	0.043125	0.288786		4.15874e-08	0.000646038	0.289109	0.00152145													0.197807	0.197808	23.4738	0.0426008	0.288786		1.30033e-06	0.00064605	0.289109	0.047571		0.206691	-0.185993	23.1872	0.0431272	0.288053		1.75362e-07	0.000621667	0.288363	0.00666701
						-0.19735	0.19735	23.1884	0.043125	0.289432		4.15874e-08	0.000646026	0.289755	0.00152148													0.19735	0.197351	23.473	0.0426021	0.289432		1.30033e-06	0.00064605	0.289755	0.047571		0.207148	-0.185571	23.1871	0.0431274	0.288674		1.68252e-07	0.000620683	0.288985	0.00640686
						-0.196894	0.196894	23.1884	0.0431251	0.290078		4.15876e-08	0.00064599	0.290401	0.00152157													0.196894	0.196895	23.4723	0.0426034	0.290078		1.30033e-06	0.00064605	0.290401	0.047571		0.207605	-0.185151	23.1871	0.0431275	0.289295		1.68002e-07	0.000619694	0.289605	0.00640753
						-0.196437	0.196437	23.1884	0.0431251	0.290724		4.15885e-08	0.000645788	0.291047	0.00152208													0.196437	0.196438	23.4716	0.0426047	0.290724		1.30033e-06	0.00064605	0.291047	0.047571		0.208062	-0.184732	23.187	0.0431277	0.289915		1.67754e-07	0.000618719	0.290224	0.00640818
						-0.195981	0.19598	23.1883	0.0431251	0.29137		-4.14137e-08	0.000644752	0.291693	-0.00151812													0.19598	0.195981	23.4709	0.042606	0.29137		1.34229e-06	0.00064605	0.291693	0.0491058		0.208518	-0.184315	23.1869	0.0431279	0.290533		1.6751e-07	0.000617757	0.290842	0.0064088
						-0.196437	0.196435	23.1884	0.0431251	0.292015		4.14207e-08	0.000643314	0.292337	0.00152177													0.195523	0.195524	23.4702	0.0426073	0.292016		1.34234e-06	0.00064605	0.292339	0.0491077		0.208975	-0.183899	23.1868	0.043128	0.291151		2.46112e-07	0.000616807	0.291459	0.00943057
						-0.195984	0.195978	23.1883	0.0431251	0.292658		-3.96732e-08	0.000633158	0.292975	-0.00148095													0.195066	0.195067	23.4694	0.0426087	0.292662		1.34234e-06	0.00064605	0.292985	0.0491077		0.209432	-0.183485	23.1866	0.0431283	0.291768		2.50479e-07	0.000615868	0.292076	0.00961252
						-0.196441	0.196416	23.1884	0.0431251	0.293291		3.97421e-08	0.000619394	0.293601	0.00151648													0.194609	0.194611	23.4687	0.04261	0.293308		1.34234e-06	0.00064605	0.293631	0.0491077		0.209889	-0.183072	23.1865	0.0431285	0.292384		2.50108e-07	0.000614939	0.292691	0.0096128
						-0.196023	0.19596	23.1883	0.0431251	0.293911		-2.41582e-08	0.000542512	0.294182	-0.00105247													0.194153	0.194154	23.4679	0.0426113	0.293954		1.34234e-06	0.00064605	0.294277	0.0491077		0.210346	-0.18266	23.1864	0.0431288	0.292999		2.49741e-07	0.00061402	0.293306	0.00961305
						-0.19648	0.196252	23.1883	0.0431251	0.294453		2.46707e-08	0.000479471	0.294693	0.00121611													0.193696	0.193697	23.4672	0.0426127	0.2946		1.32337e-06	0.00064605	0.294923	0.0484136		0.210803	-0.18225	23.1862	0.043129	0.293613		2.32759e-07	0.000613111	0.293919	0.00897267
						-0.196334	0.195795	23.1883	0.0431251	0.294933		6.92985e-10	0.000526683	0.295196	3.10977e-05													0.193239	0.19324	23.4665	0.042614	0.295246		1.3043e-06	0.00064605	0.295569	0.047716		0.211259	-0.181841	23.1861	0.0431293	0.294226		2.24982e-07	0.000612244	0.294532	0.00868513
						-0.196791	0.195533	23.1883	0.0431251	0.295459		5.30693e-11	0.000625683	0.295772	2.00467e-06													0.192782	0.192783	23.4657	0.0426153	0.295892		1.3043e-06	0.00064605	0.296215	0.047716		0.211716	-0.181433	23.186	0.0431295	0.294838		2.97159e-07	0.000611424	0.295144	0.0114868
						-0.197219	0.195076	23.1883	0.0431251	0.296085		1.40335e-10	0.000645042	0.296408	5.14201e-06													0.192325	0.192326	23.465	0.0426166	0.296538		1.3043e-06	0.00064605	0.296861	0.047716		0.212173	-0.181027	23.1858	0.0431298	0.295449		2.64136e-07	0.000610609	0.295755	0.010224
						-0.197674	0.19462	23.1883	0.0431251	0.29673		1.55162e-10	0.000643464	0.297052	5.69921e-06													0.191868	0.19187	23.4643	0.0426179	0.297184		1.3043e-06	0.00064605	0.297507	0.047716		0.21263	-0.180622	23.1857	0.04313	0.29606		2.49725e-07	0.000609728	0.296365	0.00968011
						-0.198131	0.194166	23.1883	0.0431251	0.297374		1.62562e-10	0.000641615	0.297694	5.98824e-06													0.191412	0.191413	23.4636	0.0426192	0.29783		1.3043e-06	0.00064605	0.298153	0.047716		0.213087	-0.180218	23.1856	0.0431303	0.29667		2.49382e-07	0.000608824	0.296974	0.00968115
						-0.198588	0.193716	23.1883	0.0431251	0.298015		7.14058e-08	0.000640215	0.298335	0.0026361													0.190955	0.190956	23.4629	0.0426205	0.298476		1.3447e-06	0.00064605	0.298799	0.049194		0.213544	-0.179815	23.1854	0.0431305	0.297279		2.49042e-07	0.000607931	0.297583	0.00968216
						-0.199044	0.193267	23.1883	0.0431252	0.298656		8.57864e-08	0.000638985	0.298975	0.00317308													0.190498	0.190499	23.4621	0.0426219	0.299122		1.34475e-06	0.00064605	0.299445	0.0491959		0.214	-0.179414	23.1853	0.0431308	0.297887		2.74632e-07	0.000607047	0.29819	0.0106926
						-0.199501	0.192821	23.1882	0.0431253	0.299294		8.56353e-08	0.000637837	0.299613	0.0031732													0.190041	0.190042	23.4614	0.0426232	0.299768		1.34475e-06	0.00064605	0.300092	0.0491959		0.214457	-0.179014	23.1851	0.0431311	0.298494		3.31448e-07	0.000606171	0.298797	0.0129233
						-0.199958	0.192376	23.1882	0.0431254	0.299932		8.54899e-08	0.000636734	0.300251	0.0031733													0.189584	0.189585	23.4607	0.0426246	0.300415		1.34475e-06	0.00064605	0.300738	0.0491959		0.214914	-0.178616	23.185	0.0431314	0.2991		3.30988e-07	0.000605305	0.299402	0.0129239
						-0.200415	0.191932	23.1882	0.0431255	0.300569		8.53481e-08	0.000635661	0.300887	0.00317338													0.189127	0.189129	23.4599	0.0426259	0.301061		1.34475e-06	0.00064605	0.301384	0.0491959		0.215371	-0.178219	23.1848	0.0431317	0.299705		3.30532e-07	0.000604447	0.300007	0.0129244
						-0.200872	0.19149	23.1881	0.0431256	0.301205		7.78944e-08	0.000634608	0.301522	0.00290105													0.188671	0.188672	23.4592	0.0426272	0.301707		1.32459e-06	0.00064605	0.30203	0.0484586		0.215828	-0.177823	23.1846	0.0431321	0.30031		3.14463e-07	0.000603597	0.300611	0.0123134
						-0.201329	0.191049	23.1881	0.0431256	0.301839		9.52411e-08	0.000633596	0.302156	0.00355276													0.188214	0.188215	23.4584	0.0426286	0.302353		1.30433e-06	0.00064605	0.302676	0.0477173		0.216285	-0.177429	23.1844	0.0431324	0.300913		2.94709e-07	0.000602788	0.301215	0.0115553
						-0.201785	0.19061	23.188	0.0431257	0.302473		8.53796e-08	0.000632485	0.302789	0.00319049													0.187757	0.187758	23.4577	0.0426299	0.302999		1.30433e-06	0.00064605	0.303322	0.0477173		0.216741	-0.177035	23.1843	0.0431327	0.301516		3.29957e-07	0.000602028	0.301817	0.0129537
						-0.202242	0.190173	23.188	0.0431258	0.303105		8.52399e-08	0.000631373	0.303421	0.00319089													0.1873	0.187301	23.457	0.0426312	0.303645		1.30433e-06	0.00064605	0.303968	0.0477173		0.217198	-0.176643	23.1841	0.043133	0.302118		3.79284e-07	0.000601271	0.302419	0.014909
						-0.202699	0.189737	23.1879	0.0431259	0.303737		8.51039e-08	0.000630291	0.304052	0.00319126													0.186843	0.186845	23.4563	0.0426325	0.304291		1.30433e-06	0.00064605	0.304614	0.0477173		0.217655	-0.176252	23.1839	0.0431334	0.302719		3.76704e-07	0.000600519	0.303019	0.0148261
						-0.203156	0.189303	23.1879	0.043126	0.304367		8.49706e-08	0.000629234	0.304682	0.00319161													0.186386	0.186388	23.4556	0.0426338	0.304937		1.30433e-06	0.00064605	0.30526	0.0477173		0.218112	-0.175863	23.1837	0.0431337	0.30332		3.30811e-07	0.000599767	0.30362	0.0130362
						-0.203613	0.18887	23.1878	0.0431261	0.304996		1.37659e-07	0.000628197	0.30531	0.00517919													0.18593	0.185931	23.4549	0.0426351	0.305583		1.34309e-06	0.00064605	0.305906	0.0491351		0.218569	-0.175474	23.1835	0.0431341	0.303919		3.3039e-07	0.000598935	0.304219	0.0130377
						-0.20407	0.188439	23.1878	0.0431262	0.305625		1.69058e-07	0.000627178	0.305938	0.00637087													0.185473	0.185474	23.4541	0.0426364	0.306229		1.34314e-06	0.00064605	0.306552	0.049137		0.219026	-0.175087	23.1833	0.0431344	0.304518		3.29973e-07	0.000598111	0.304817	0.0130392
						-0.204526	0.188009	23.1877	0.0431264	0.306252		1.68791e-07	0.000626173	0.306565	0.00637102													0.185016	0.185017	23.4534	0.0426378	0.306875		1.34314e-06	0.00064605	0.307198	0.049137		0.219482	-0.1747	23.1832	0.0431347	0.305117		3.68805e-07	0.000597294	0.305415	0.0145936
						-0.204983	0.187581	23.1876	0.0431265	0.306878		1.68527e-07	0.000625181	0.30719	0.00637114													0.184559	0.18456	23.4526	0.0426391	0.307521		1.34314e-06	0.00064605	0.307844	0.049137		0.219939	-0.174316	23.183	0.0431351	0.305714		4.12141e-07	0.000596484	0.306012	0.0163306
						-0.20544	0.187154	23.1875	0.0431267	0.307503		1.68265e-07	0.000624201	0.307815	0.00637125													0.184102	0.184104	23.4519	0.0426405	0.308167		1.34314e-06	0.00064605	0.30849	0.049137		0.220396	-0.173932	23.1828	0.0431355	0.30631		4.1161e-07	0.000595682	0.306608	0.0163315
						-0.205897	0.186729	23.1874	0.0431269	0.308127		1.40052e-07	0.000623231	0.308439	0.0053112													0.183646	0.183647	23.4512	0.0426418	0.308813		1.32188e-06	0.00064605	0.309136	0.0483592		0.220853	-0.17355	23.1825	0.0431359	0.306906		3.96458e-07	0.000594887	0.307203	0.0157513
						-0.206354	0.186305	23.1873	0.043127	0.30875		2.04383e-07	0.000622319	0.309062	0.00776222													0.183189	0.18319	23.4504	0.0426431	0.309459		1.30049e-06	0.000646049	0.309782	0.0475769		0.22131	-0.173169	23.1823	0.0431363	0.307501		3.77862e-07	0.000594133	0.307798	0.0150315
						-0.206811	0.185882	23.1872	0.0431272	0.309373		1.68439e-07	0.000621419	0.309683	0.00640636													0.182732	0.182733	23.4497	0.0426444	0.310105		1.30049e-06	0.000646049	0.310428	0.0475769		0.221767	-0.172789	23.1821	0.0431367	0.308095		3.7739e-07	0.000593425	0.308392	0.0150307
						-0.207267	0.185461	23.1871	0.0431274	0.309994		1.68186e-07	0.00062042	0.310304	0.00640704													0.182275	0.182276	23.449	0.0426457	0.310751		1.30049e-06	0.000646049	0.311074	0.0475769		0.222223	-0.17241	23.1819	0.0431371	0.308688		4.17627e-07	0.000592721	0.308985	0.016653
						-0.207724	0.185041	23.187	0.0431276	0.310615		1.67936e-07	0.000619435	0.310924	0.00640771													0.181818	0.18182	23.4483	0.042647	0.311397		1.30049e-06	0.000646049	0.31172	0.0475769		0.22268	-0.172033	23.1817	0.0431375	0.309281		4.62032e-07	0.000592021	0.309577	0.0184454
						-0.208181	0.184623	23.1869	0.0431277	0.311234		1.6769e-07	0.000618464	0.311543	0.00640834													0.181361	0.181363	23.4476	0.0426483	0.312043		1.30049e-06	0.000646049	0.312366	0.0475769		0.223137	-0.171656	23.1814	0.043138	0.309873		4.61453e-07	0.000591325	0.310169	0.018444
						-0.208638	0.184206	23.1868	0.0431279	0.311853		1.84568e-07	0.000617505	0.312161	0.00706433													0.180905	0.180906	23.4469	0.0426496	0.312689		1.33752e-06	0.000646049	0.313013	0.0489316		0.223594	-0.171281	23.1812	0.0431384	0.310465		4.60876e-07	0.000590632	0.31076	0.0184425
						-0.209095	0.183791	23.1867	0.0431281	0.31247		2.50754e-07	0.000616558	0.312778	0.0096123													0.180448	0.180449	23.4461	0.042651	0.313336		1.33758e-06	0.000646049	0.313659	0.0489336		0.224051	-0.170906	23.1809	0.0431389	0.311055		4.18676e-07	0.000589944	0.31135	0.0167734
						-0.209552	0.183377	23.1866	0.0431283	0.313087		2.50381e-07	0.000615622	0.313394	0.0096126													0.179991	0.179992	23.4454	0.0426523	0.313982		1.33758e-06	0.000646049	0.314305	0.0489336		0.224508	-0.170533	23.1807	0.0431393	0.311645		4.11482e-07	0.000589191	0.31194	0.0165063
						-0.210008	0.182964	23.1865	0.0431286	0.313702		2.50011e-07	0.000614696	0.31401	0.00961287													0.179534	0.179535	23.4447	0.0426536	0.314628		1.33758e-06	0.000646049	0.314951	0.0489336		0.224964	-0.170161	23.1805	0.0431397	0.312234		4.46786e-07	0.000588433	0.312528	0.0179455
						-0.210465	0.182553	23.1863	0.0431288	0.314317		2.49645e-07	0.00061378	0.314624	0.00961311													0.179077	0.179079	23.4439	0.042655	0.315274		1.33758e-06	0.000646049	0.315597	0.0489336		0.225421	-0.16979	23.1803	0.0431402	0.312823		4.93859e-07	0.000587682	0.313117	0.0198616
						-0.210922	0.182143	23.1862	0.0431291	0.314931		2.22949e-07	0.000612873	0.315237	0.00859781													0.17862	0.178622	23.4432	0.0426563	0.31592		1.31529e-06	0.000646049	0.316243	0.0481181		0.225878	-0.16942	23.18	0.0431407	0.31341		4.79641e-07	0.000586937	0.313704	0.0193143
						-0.211379	0.181734	23.1861	0.0431293	0.315544		2.47292e-07	0.000612028	0.31585	0.00954977													0.178164	0.178165	23.4425	0.0426576	0.316566		1.29286e-06	0.000646049	0.316889	0.0472976		0.226335	-0.169052	23.1797	0.0431411	0.313997		4.62219e-07	0.000586232	0.31429	0.0186351
						-0.211836	0.181327	23.186	0.0431296	0.316156		2.9704e-07	0.000611209	0.316461	0.0114863													0.177707	0.177708	23.4418	0.0426589	0.317212		1.29286e-06	0.000646049	0.317535	0.0472976		0.226792	-0.168684	23.1795	0.0431416	0.314584		4.61693e-07	0.000585572	0.314876	0.0186349
						-0.212292	0.180921	23.1858	0.0431299	0.316767		2.51844e-07	0.000610395	0.317072	0.00975155													0.17725	0.177251	23.441	0.0426602	0.317858		1.29286e-06	0.000646049	0.318181	0.0472976		0.227248	-0.168318	23.1792	0.0431421	0.315169		4.61167e-07	0.000584916	0.315462	0.0186346
						-0.212749	0.180516	23.1857	0.0431301	0.317377		2.49635e-07	0.000609489	0.317682	0.00968039													0.176793	0.176794	23.4403	0.0426615	0.318504		1.29286e-06	0.000646049	0.318827	0.0472976		0.227705	-0.167953	23.179	0.0431425	0.315754		4.89267e-07	0.000584262	0.316046	0.0197921
						-0.213206	0.180112	23.1855	0.0431304	0.317987		2.49292e-07	0.000608589	0.318291	0.00968142													0.176336	0.176338	23.4396	0.0426628	0.31915		1.29286e-06	0.000646049	0.319473	0.0472976		0.228162	-0.167588	23.1787	0.043143	0.316338		5.46345e-07	0.000583612	0.31663	0.0221257
						-0.213663	0.17971	23.1854	0.0431306	0.318595		2.48953e-07	0.000607698	0.318899	0.00968242													0.175879	0.175881	23.4389	0.0426641	0.319796		1.3281e-06	0.000646049	0.320119	0.048587		0.228619	-0.167225	23.1784	0.0431436	0.316922		5.45716e-07	0.000582966	0.317213	0.0221247
						-0.21412	0.17931	23.1853	0.0431309	0.319203		2.96272e-07	0.000606816	0.319506	0.0115395													0.175423	0.175424	23.4382	0.0426654	0.320442		1.32816e-06	0.000646049	0.320765	0.0485891		0.229076	-0.166863	23.1781	0.0431441	0.317505		5.45089e-07	0.000582323	0.317796	0.0221237
						-0.214577	0.17891	23.1851	0.0431311	0.31981		3.31327e-07	0.000605943	0.320113	0.0129235													0.174966	0.174967	23.4374	0.0426668	0.321088		1.32816e-06	0.000646049	0.321411	0.0485891		0.229533	-0.166502	23.1778	0.0431446	0.318087		5.44464e-07	0.000581683	0.318378	0.0221226
						-0.215033	0.178512	23.1849	0.0431315	0.320416		3.30868e-07	0.000605079	0.320718	0.012924													0.174509	0.17451	23.4367	0.0426681	0.321734		1.32816e-06	0.000646049	0.322057	0.0485891		0.229989	-0.166142	23.1776	0.0431452	0.318669		5.37467e-07	0.000581047	0.318959	0.0218622
						-0.21549	0.178115	23.1847	0.0431318	0.321021		3.30413e-07	0.000604223	0.321323	0.0129245													0.174052	0.174054	23.436	0.0426694	0.32238		1.32816e-06	0.000646049	0.322703	0.0485891		0.230446	-0.165783	23.1773	0.0431457	0.31925		5.09631e-07	0.000580406	0.31954	0.0207529
						-0.215947	0.17772	23.1846	0.0431321	0.321625		3.05215e-07	0.000603375	0.321927	0.0119556													0.173595	0.173597	23.4353	0.0426707	0.323026		1.30492e-06	0.000646049	0.323349	0.047739		0.230903	-0.165425	23.177	0.0431462	0.31983		5.6491e-07	0.000579706	0.32012	0.0230317
						-0.216404	0.177326	23.1844	0.0431324	0.322228		2.94602e-07	0.000602588	0.32253	0.011555													0.173138	0.17314	23.4345	0.042672	0.323672		1.28154e-06	0.000646049	0.323995	0.0468835		0.23136	-0.165068	23.1767	0.0431468	0.32041		5.48695e-07	0.000579045	0.3207	0.0223961
						-0.216861	0.176933	23.1842	0.0431327	0.322831		3.52181e-07	0.000601829	0.323132	0.0138308													0.172682	0.172683	23.4338	0.0426733	0.324318		1.28154e-06	0.000646049	0.324641	0.0468835		0.231817	-0.164712	23.1764	0.0431474	0.320989		5.48122e-07	0.000578428	0.321278	0.0223966
						-0.217318	0.176541	23.1841	0.0431331	0.323433		3.79148e-07	0.000601074	0.323733	0.0149085													0.172225	0.172226	23.4331	0.0426746	0.324964		1.28154e-06	0.000646049	0.325287	0.0468835		0.232274	-0.164357	23.1761	0.0431479	0.321568		5.4755e-07	0.000577815	0.321856	0.022397
						-0.217774	0.17615	23.1839	0.0431335	0.324034		3.64152e-07	0.000600323	0.324334	0.0143368													0.171768	0.171769	23.4324	0.0426759	0.32561		1.28154e-06	0.000646049	0.325933	0.0468835		0.23273	-0.164003	23.1758	0.0431484	0.322145		5.4698e-07	0.000577204	0.322434	0.0223973
						-0.218231	0.175761	23.1837	0.0431338	0.324634		3.307e-07	0.000599549	0.324934	0.0130366													0.171311	0.171313	23.4317	0.0426772	0.326257		1.28154e-06	0.000646049	0.32658	0.0468835		0.233187	-0.163651	23.1755	0.043149	0.322723		5.46412e-07	0.000576595	0.323011	0.0223977
						-0.218688	0.175373	23.1835	0.0431342	0.325234		3.30281e-07	0.000598718	0.325533	0.0130381													0.170854	0.170856	23.431	0.0426785	0.326903		1.31496e-06	0.000646049	0.327226	0.0481061		0.233644	-0.163299	23.1752	0.0431495	0.323299		6.32459e-07	0.00057599	0.323587	0.025952
						-0.219145	0.174986	23.1833	0.0431345	0.325832		3.29864e-07	0.000597896	0.326131	0.0130396													0.170397	0.170399	23.4303	0.0426798	0.327549		1.31501e-06	0.000646048	0.327872	0.0481082		0.234101	-0.162948	23.1749	0.0431502	0.323875		6.32493e-07	0.000575388	0.324163	0.0259806
						-0.219602	0.1746	23.1831	0.0431348	0.32643		3.904e-07	0.000597081	0.326729	0.0154536													0.169941	0.169942	23.4296	0.0426811	0.328195		1.31501e-06	0.000646048	0.328518	0.0481082		0.234558	-0.162598	23.1745	0.0431508	0.324451		6.31823e-07	0.000574789	0.324738	0.0259801
						-0.220059	0.174215	23.1829	0.0431352	0.327027		4.12002e-07	0.000596273	0.327326	0.0163308													0.169484	0.169485	23.4289	0.0426824	0.328841		1.31501e-06	0.000646048	0.329164	0.0481082		0.235015	-0.162249	23.1742	0.0431514	0.325025		6.31156e-07	0.000574193	0.325312	0.0259796
						-0.220515	0.173832	23.1827	0.0431356	0.327624		4.11471e-07	0.000595473	0.327921	0.0163317													0.169027	0.169029	23.4281	0.0426837	0.329487		1.31501e-06	0.000646048	0.32981	0.0481082		0.235471	-0.161902	23.1739	0.0431521	0.3256		6.30491e-07	0.0005736	0.325886	0.0259791
						-0.220972	0.17345	23.1825	0.043136	0.328219		3.87771e-07	0.00059468	0.328517	0.0154115													0.16857	0.168572	23.4274	0.042685	0.330133		1.29093e-06	0.000646048	0.330456	0.047227		0.235928	-0.161555	23.1735	0.0431527	0.326173		6.1689e-07	0.00057301	0.32646	0.0254448
						-0.221429	0.173069	23.1823	0.0431364	0.328814		3.77738e-07	0.000593947	0.329111	0.0150313													0.168113	0.168115	23.4267	0.0426863	0.330779		1.26667e-06	0.000646048	0.331102	0.0463397		0.236385	-0.161209	23.1732	0.0431533	0.326746		6.68286e-07	0.000572457	0.327032	0.0275914
						-0.221886	0.17269	23.1821	0.0431368	0.329408		3.77267e-07	0.00059324	0.329704	0.0150304													0.167656	0.167658	23.426	0.0426876	0.331425		1.26667e-06	0.000646048	0.331748	0.0463397		0.236842	-0.160864	23.1728	0.043154	0.327319		6.46752e-07	0.000571945	0.327605	0.0267262
						-0.222343	0.172311	23.1819	0.0431372	0.330001		4.39881e-07	0.000592538	0.330297	0.0175458													0.1672	0.167201	23.4253	0.0426889	0.332071		1.26667e-06	0.000646048	0.332394	0.0463397		0.237299	-0.16052	23.1725	0.0431546	0.327891		6.36998e-07	0.000571381	0.328176	0.0263491
						-0.2228	0.171934	23.1816	0.0431376	0.330594		4.6188e-07	0.000591838	0.33089	0.0184451													0.166743	0.166744	23.4246	0.0426901	0.332717		1.26667e-06	0.000646048	0.33304	0.0463397		0.237756	-0.160176	23.1721	0.0431553	0.328462		6.36388e-07	0.000570808	0.328747	0.0263503
						-0.223256	0.171558	23.1814	0.0431381	0.331185		4.61302e-07	0.000591143	0.331481	0.0184436													0.166286	0.166288	23.4239	0.0426914	0.333363		1.26667e-06	0.000646048	0.333686	0.0463397		0.238212	-0.159834	23.1718	0.0431559	0.329033		6.35779e-07	0.000570237	0.329318	0.0263515
						-0.223713	0.171183	23.1811	0.0431385	0.331777		4.54794e-07	0.000590452	0.332072	0.0182047													0.165829	0.165831	23.4232	0.0426927	0.334009		1.29824e-06	0.000646048	0.334332	0.0474945		0.238669	-0.159493	23.1715	0.0431565	0.329603		6.35172e-07	0.000569669	0.329888	0.0263526
						-0.22417	0.170808	23.1809	0.043139	0.332367		4.11838e-07	0.000589754	0.332662	0.0165048													0.165372	0.165374	23.4225	0.042694	0.334655		1.29829e-06	0.000646048	0.334978	0.0474966		0.239126	-0.159153	23.1711	0.0431572	0.330173		6.75614e-07	0.000569103	0.330457	0.0280583
						-0.224627	0.170435	23.1807	0.0431394	0.332957		4.11356e-07	0.000588992	0.333251	0.0165068													0.164915	0.164917	23.4218	0.0426953	0.335301		1.29829e-06	0.000646048	0.335624	0.0474966		0.239583	-0.158813	23.1708	0.0431579	0.330742		7.22747e-07	0.00056854	0.331026	0.0300454
						-0.225084	0.170064	23.1804	0.0431398	0.333546		4.68451e-07	0.000588236	0.33384	0.018822													0.164459	0.16446	23.4211	0.0426965	0.335947		1.29829e-06	0.000646048	0.33627	0.0474966		0.24004	-0.158475	23.1704	0.0431586	0.33131		7.2204e-07	0.00056798	0.331594	0.0300457
						-0.225541	0.169693	23.1802	0.0431403	0.334134		4.93704e-07	0.000587486	0.334428	0.019862													0.164002	0.164003	23.4204	0.0426978	0.336593		1.29829e-06	0.000646048	0.336916	0.0474966		0.240497	-0.158137	23.17	0.0431593	0.331878		7.21335e-07	0.000567423	0.332162	0.0300458
						-0.225997	0.169324	23.1799	0.0431408	0.334722		4.71521e-07	0.000586743	0.335015	0.0189936													0.163545	0.163547	23.4197	0.0426991	0.337239		1.27345e-06	0.000646048	0.337562	0.0465877		0.240953	-0.157801	23.1696	0.04316	0.332446		7.08694e-07	0.000566868	0.332729	0.0295482
						-0.226454	0.168956	23.1797	0.0431413	0.335308		4.62081e-07	0.000586059	0.335601	0.0186351													0.163088	0.16309	23.419	0.0427004	0.337885		1.24842e-06	0.000646048	0.338208	0.0456721		0.24141	-0.157465	23.1692	0.0431607	0.333013		6.93262e-07	0.000566349	0.333296	0.0289313
						-0.226911	0.168588	23.1794	0.0431417	0.335894		4.61555e-07	0.0005854	0.336187	0.0186348													0.162631	0.162633	23.4183	0.0427017	0.338531		1.24842e-06	0.000646048	0.338854	0.0456721		0.241867	-0.15713	23.1688	0.0431614	0.333579		7.0442e-07	0.00056587	0.333862	0.0294217
						-0.227368	0.168222	23.1792	0.0431422	0.33648		4.6103e-07	0.000584744	0.336772	0.0186345													0.162175	0.162176	23.4176	0.0427029	0.339177		1.24842e-06	0.000646048	0.3395	0.0456721		0.242324	-0.156796	23.1685	0.0431621	0.334145		7.84653e-07	0.000565393	0.334427	0.0328005
						-0.227825	0.167857	23.1789	0.0431426	0.337064		5.11674e-07	0.000584092	0.337356	0.0207046													0.161718	0.161719	23.4169	0.0427042	0.339824		1.24842e-06	0.000646048	0.340147	0.0456721		0.242781	-0.156463	23.168	0.0431629	0.33471		7.8395e-07	0.000564916	0.334993	0.0327988
						-0.228282	0.167493	23.1786	0.0431432	0.337649		5.4618e-07	0.000583443	0.33794	0.0221254													0.161261	0.161263	23.4162	0.0427054	0.34047		1.24842e-06	0.000646048	0.340793	0.0456721		0.243238	-0.156131	23.1676	0.0431637	0.335275		7.83248e-07	0.000564441	0.335557	0.032797
						-0.228738	0.16713	23.1784	0.0431437	0.338232		5.45551e-07	0.000582797	0.338523	0.0221244													0.160804	0.160806	23.4156	0.0427067	0.341116		1.27812e-06	0.000646048	0.341439	0.0467587		0.243694	-0.155799	23.1672	0.0431645	0.335839		7.31892e-07	0.000563966	0.336121	0.0306724
						-0.229195	0.166769	23.1781	0.0431442	0.338815		5.44925e-07	0.000582155	0.339106	0.0221234													0.160347	0.160349	23.4148	0.0427079	0.341762		1.27818e-06	0.000646048	0.342085	0.0467607		0.244151	-0.155469	23.1668	0.0431652	0.336403		7.27905e-07	0.000563436	0.336685	0.030534
						-0.229652	0.166408	23.1778	0.0431448	0.339397		5.44301e-07	0.000581516	0.339688	0.0221223													0.15989	0.159892	23.4141	0.0427092	0.342408		1.27818e-06	0.000646047	0.342731	0.0467607		0.244608	-0.155139	23.1664	0.0431659	0.336967		7.27266e-07	0.000562906	0.337248	0.030536
						-0.230109	0.166048	23.1775	0.0431453	0.339978		5.24415e-07	0.000580881	0.340269	0.0213374													0.159434	0.159435	23.4134	0.0427105	0.343054		1.27818e-06	0.000646047	0.343377	0.0467607		0.245065	-0.15481	23.166	0.0431667	0.33753		7.94623e-07	0.000562377	0.337811	0.0333955
						-0.230566	0.165689	23.1772	0.0431459	0.340559		5.3148e-07	0.000580222	0.340849	0.0216494													0.158977	0.158978	23.4127	0.0427118	0.3437		1.27818e-06	0.000646047	0.344023	0.0467607		0.245522	-0.154482	23.1656	0.0431675	0.338092		8.16736e-07	0.000561851	0.338373	0.0343569
						-0.231023	0.165331	23.1769	0.0431464	0.34114		5.5737e-07	0.000579524	0.341429	0.0227314													0.15852	0.158522	23.412	0.0427131	0.344346		1.25268e-06	0.000646047	0.344669	0.0458277		0.245979	-0.154155	23.1652	0.0431683	0.338654		8.05115e-07	0.000561327	0.338935	0.0338997
						-0.231479	0.164975	23.1766	0.0431469	0.341719		5.48545e-07	0.000578883	0.342009	0.0223962													0.158063	0.158065	23.4114	0.0427143	0.344992		1.22697e-06	0.000646047	0.345315	0.0448874		0.246435	-0.153829	23.1647	0.0431691	0.339215		7.90957e-07	0.000560838	0.339496	0.0333326
						-0.231936	0.164619	23.1763	0.0431475	0.342298		5.47973e-07	0.000578268	0.342587	0.0223967													0.157606	0.157608	23.4107	0.0427155	0.345638		1.22697e-06	0.000646047	0.345961	0.0448874		0.246892	-0.153503	23.1643	0.0431699	0.339776		7.90322e-07	0.00056039	0.340056	0.0333325
						-0.232393	0.164265	23.176	0.043148	0.342876		5.47401e-07	0.000577655	0.343165	0.0223971													0.157149	0.157151	23.41	0.0427168	0.346284		1.22697e-06	0.000646047	0.346607	0.0448874		0.247349	-0.153179	23.1639	0.0431707	0.340337		7.89687e-07	0.000559941	0.340617	0.0333324
						-0.23285	0.163911	23.1757	0.0431486	0.343454		5.46831e-07	0.000577044	0.343742	0.0223974													0.156693	0.156694	23.4093	0.042718	0.34693		1.22697e-06	0.000646047	0.347253	0.0448874		0.247806	-0.152855	23.1635	0.0431715	0.340897		8.19941e-07	0.000559494	0.341176	0.0346371
						-0.233307	0.163559	23.1754	0.0431491	0.344031		5.68386e-07	0.000576437	0.344319	0.0233048													0.156236	0.156238	23.4087	0.0427192	0.347576		1.22697e-06	0.000646047	0.347899	0.0448874		0.248263	-0.152532	23.163	0.0431723	0.341456		8.83453e-07	0.000559047	0.341736	0.0373499
						-0.233763	0.163207	23.1751	0.0431497	0.344607		6.32989e-07	0.000575832	0.344895	0.0259809													0.155779	0.155781	23.408	0.0427204	0.348222		1.25481e-06	0.000646047	0.348545	0.0459059		0.248719	-0.15221	23.1625	0.0431732	0.342015		8.82723e-07	0.000558601	0.342294	0.0373488
						-0.23422	0.162857	23.1748	0.0431503	0.345183		6.32318e-07	0.000575231	0.345471	0.0259805													0.155322	0.155324	23.4073	0.0427217	0.348868		1.25487e-06	0.000646047	0.349191	0.045908		0.249176	-0.151888	23.1621	0.043174	0.342574		8.81993e-07	0.000558155	0.342853	0.0373477
						-0.234677	0.162507	23.1744	0.043151	0.345758		6.31649e-07	0.000574633	0.346046	0.02598													0.154865	0.154867	23.4066	0.042723	0.349514		1.25487e-06	0.000646047	0.349837	0.045908		0.249633	-0.151568	23.1616	0.0431749	0.343132		8.81264e-07	0.000557711	0.343411	0.0373466
						-0.235134	0.162158	23.1741	0.0431516	0.346333		6.30982e-07	0.000574037	0.34662	0.0259795													0.154408	0.15441	23.4059	0.0427242	0.35016		1.25487e-06	0.000646047	0.350483	0.045908		0.25009	-0.151248	23.1611	0.0431758	0.34369		8.80535e-07	0.000557267	0.343968	0.0373454
						-0.235591	0.161811	23.1738	0.0431522	0.346907		6.30318e-07	0.000573445	0.347194	0.0259789													0.153952	0.153953	23.4052	0.0427255	0.350806		1.25487e-06	0.000646047	0.351129	0.045908		0.250547	-0.150929	23.1607	0.0431767	0.344247		8.54762e-07	0.000556825	0.344525	0.0362811
						-0.236048	0.161464	23.1734	0.0431529	0.347481		6.10177e-07	0.000572857	0.347767	0.0251746													0.153495	0.153497	23.4046	0.0427267	0.351452		1.22881e-06	0.000646047	0.351775	0.0449545		0.251004	-0.15061	23.1602	0.0431775	0.344804		8.94076e-07	0.00055636	0.345082	0.0379816
						-0.236504	0.161119	23.1731	0.0431535	0.348053		6.8617e-07	0.000572323	0.34834	0.0283364													0.153038	0.15304	23.4039	0.0427279	0.352098		1.20253e-06	0.000646047	0.352421	0.0439931		0.25146	-0.150293	23.1597	0.0431784	0.34536		8.94441e-07	0.000555897	0.345638	0.0380287
						-0.236961	0.160774	23.1727	0.0431542	0.348626		6.3745e-07	0.000571806	0.348912	0.0263482													0.152581	0.152583	23.4032	0.0427291	0.352744		1.20253e-06	0.000646047	0.353067	0.0439931		0.251917	-0.149976	23.1592	0.0431793	0.345916		8.93782e-07	0.000555475	0.346194	0.0380296
						-0.237418	0.16043	23.1724	0.0431548	0.349198		6.36839e-07	0.000571231	0.349483	0.0263494													0.152124	0.152126	23.4026	0.0427303	0.353391		1.20253e-06	0.000646047	0.353714	0.0439931		0.252374	-0.14966	23.1588	0.0431802	0.346471		8.93122e-07	0.000555052	0.346749	0.0380304
						-0.237875	0.160087	23.1721	0.0431554	0.349769		6.36229e-07	0.000570659	0.350054	0.0263506													0.151667	0.151669	23.4019	0.0427316	0.354037		1.20253e-06	0.000646047	0.35436	0.0439931		0.252831	-0.149345	23.1583	0.0431811	0.347026		8.92462e-07	0.00055463	0.347304	0.0380312
						-0.238332	0.159745	23.1717	0.0431561	0.350339		6.3562e-07	0.000570089	0.350624	0.0263517													0.151211	0.151213	23.4013	0.0427328	0.354683		1.20253e-06	0.000646046	0.355006	0.0439931		0.253288	-0.14903	23.1578	0.043182	0.347581		8.91801e-07	0.000554209	0.347858	0.0380319
						-0.238789	0.159404	23.1714	0.0431567	0.35091		6.35014e-07	0.000569521	0.351194	0.0263528													0.150754	0.150756	23.4006	0.042734	0.355329		1.22852e-06	0.000646046	0.355652	0.044944		0.253745	-0.148716	23.1573	0.0431829	0.348135		9.25622e-07	0.000553788	0.348412	0.0395043
						-0.239245	0.159064	23.171	0.0431573	0.351479		6.98668e-07	0.000568956	0.351764	0.0290232													0.150297	0.150299	23.3999	0.0427352	0.355975		1.22857e-06	0.000646046	0.356298	0.0449461		0.254201	-0.148403	23.1568	0.0431838	0.348689		9.8853e-07	0.000553367	0.348966	0.0422212
						-0.239702	0.158725	23.1707	0.043158	0.352048		7.22562e-07	0.000568394	0.352332	0.0300455													0.14984	0.149842	23.3992	0.0427364	0.356621		1.22857e-06	0.000646046	0.356944	0.0449461		0.254658	-0.148091	23.1563	0.0431848	0.349242		9.87773e-07	0.000552947	0.349519	0.0422209
						-0.240159	0.158386	23.1703	0.0431588	0.352616		7.21855e-07	0.000567834	0.3529	0.0300457													0.149383	0.149385	23.3986	0.0427376	0.357267		1.22857e-06	0.000646046	0.35759	0.0449461		0.255115	-0.147779	23.1558	0.0431858	0.349795		9.87017e-07	0.000552528	0.350072	0.0422206
						-0.240616	0.158049	23.1699	0.0431595	0.353184		7.21151e-07	0.000567277	0.353468	0.0300459													0.148926	0.148928	23.3979	0.0427389	0.357913		1.22857e-06	0.000646046	0.358236	0.0449461		0.255572	-0.147469	23.1552	0.0431868	0.350348		9.86261e-07	0.00055211	0.350624	0.0422202
						-0.241073	0.157713	23.1695	0.0431602	0.353751		7.01531e-07	0.000566723	0.354035	0.029257													0.14847	0.148472	23.3972	0.0427401	0.358559		1.20205e-06	0.000646046	0.358882	0.0439758		0.256029	-0.147159	23.1547	0.0431878	0.3509		9.75172e-07	0.000551693	0.351176	0.0417771
						-0.24153	0.157378	23.1691	0.0431609	0.354318		6.93103e-07	0.000566224	0.354601	0.028931													0.148013	0.148015	23.3966	0.0427413	0.359205		1.17529e-06	0.000646046	0.359528	0.0429969		0.256486	-0.146849	23.1542	0.0431887	0.351452		9.61688e-07	0.000551308	0.351727	0.0412281
						-0.241986	0.157043	23.1687	0.0431616	0.354884		7.2847e-07	0.000565746	0.355167	0.030433													0.147556	0.147558	23.3959	0.0427425	0.359851		1.17529e-06	0.000646046	0.360174	0.0429969		0.256942	-0.146541	23.1537	0.0431897	0.352003		1.04389e-06	0.000550963	0.352278	0.0447801
						-0.242443	0.156709	23.1684	0.0431623	0.35545		7.84469e-07	0.000565268	0.355733	0.0328001													0.147099	0.147101	23.3953	0.0427437	0.360497		1.17529e-06	0.000646046	0.36082	0.0429969		0.257399	-0.146233	23.1531	0.0431908	0.352554		1.06356e-06	0.000550616	0.352829	0.0456526
						-0.2429	0.156376	23.1679	0.0431631	0.356015		7.83766e-07	0.000564792	0.356298	0.0327984													0.146642	0.146644	23.3946	0.0427448	0.361143		1.17529e-06	0.000646046	0.361466	0.0429969		0.257856	-0.145925	23.1525	0.0431918	0.353105		1.0413e-06	0.000550269	0.35338	0.0447254
						-0.243357	0.156044	23.1675	0.0431639	0.35658		7.72288e-07	0.000564316	0.356862	0.0323453													0.146185	0.146188	23.394	0.042746	0.361789		1.17529e-06	0.000646046	0.362112	0.0429969		0.258313	-0.145619	23.152	0.0431929	0.353655		1.00218e-06	0.000549903	0.35393	0.0430737
						-0.243814	0.155713	23.1671	0.0431647	0.357145		7.28379e-07	0.00056383	0.357426	0.0305325													0.145729	0.145731	23.3934	0.0427472	0.362435		1.19947e-06	0.000646046	0.362758	0.0438814		0.25877	-0.145312	23.1514	0.0431939	0.354205		1.00149e-06	0.000549503	0.354479	0.0430756
						-0.244271	0.155382	23.1667	0.0431654	0.357708		7.27738e-07	0.000563297	0.35799	0.0305345													0.145272	0.145274	23.3927	0.0427484	0.363081		1.19953e-06	0.000646046	0.363404	0.0438834		0.259227	-0.145007	23.1509	0.0431949	0.354754		1.00081e-06	0.000549104	0.355029	0.0430773
						-0.244727	0.155053	23.1663	0.0431661	0.358272		7.27995e-07	0.000562767	0.358553	0.0305741													0.144815	0.144817	23.392	0.0427496	0.363727		1.19953e-06	0.000646046	0.36405	0.0438834		0.259683	-0.144702	23.1504	0.0431959	0.355303		1.02205e-06	0.000548706	0.355578	0.0440236
						-0.245184	0.154724	23.1659	0.0431669	0.358834		8.17283e-07	0.000562239	0.359116	0.0343562													0.144358	0.14436	23.3914	0.0427508	0.364373		1.19953e-06	0.000646046	0.364696	0.0438834		0.26014	-0.144398	23.1498	0.0431969	0.355852		1.10114e-06	0.000548308	0.356126	0.0474646
						-0.245641	0.154396	23.1655	0.0431677	0.359397		8.16543e-07	0.000561714	0.359678	0.0343572													0.143901	0.143903	23.3907	0.042752	0.365019		1.19953e-06	0.000646046	0.365342	0.0438834		0.260597	-0.144095	23.1492	0.043198	0.3564		1.10035e-06	0.00054791	0.356674	0.0474653
						-0.246098	0.15407	23.165	0.0431685	0.359958		7.98559e-07	0.000561191	0.360239	0.0336318													0.143444	0.143447	23.3901	0.0427532	0.365665		1.17264e-06	0.000646045	0.365988	0.0428999		0.261054	-0.143793	23.1486	0.0431991	0.356948		1.09041e-06	0.000547514	0.357222	0.0470705
						-0.246555	0.153744	23.1646	0.0431693	0.36052		7.90791e-07	0.000560721	0.3608	0.0333326													0.142988	0.14299	23.3894	0.0427543	0.366311		1.1455e-06	0.000646045	0.366634	0.0419071		0.261511	-0.143491	23.1481	0.0432002	0.357496		1.07836e-06	0.000547149	0.357769	0.0465811
						-0.247012	0.153419	23.1642	0.0431701	0.36108		7.90156e-07	0.000560272	0.36136	0.0333325													0.142531	0.142533	23.3888	0.0427555	0.366957		1.1455e-06	0.000646045	0.367281	0.0419071		0.261968	-0.14319	23.1475	0.0432013	0.358043		1.07771e-06	0.000546824	0.358316	0.046581
						-0.247468	0.153094	23.1638	0.0431709	0.361641		7.89521e-07	0.000559824	0.361921	0.0333323													0.142074	0.142076	23.3882	0.0427566	0.367604		1.1455e-06	0.000646045	0.367927	0.0419071		0.262424	-0.142889	23.1469	0.0432023	0.35859		1.07706e-06	0.000546497	0.358863	0.0465809
						-0.247925	0.152771	23.1633	0.0431717	0.3622		8.44618e-07	0.000559377	0.36248	0.035687													0.141617	0.141619	23.3876	0.0427578	0.36825		1.1455e-06	0.000646045	0.368573	0.0419071		0.262881	-0.142589	23.1463	0.0432034	0.359136		1.1397e-06	0.000546169	0.359409	0.0493193
						-0.248382	0.152448	23.1629	0.0431725	0.36276		8.83262e-07	0.00055893	0.363039	0.0373496													0.14116	0.141163	23.3869	0.0427589	0.368896		1.1455e-06	0.000646045	0.369219	0.0419071		0.263338	-0.14229	23.1457	0.0432045	0.359682		1.18321e-06	0.000545841	0.359955	0.0512328
						-0.248839	0.152126	23.1624	0.0431734	0.363319		8.82532e-07	0.000558484	0.363598	0.0373485													0.140704	0.140706	23.3863	0.0427601	0.369542		1.1679e-06	0.000646045	0.369865	0.0427265		0.263795	-0.141991	23.1451	0.0432057	0.360228		1.18246e-06	0.000545512	0.360501	0.0512316
						-0.249296	0.151804	23.1619	0.0431743	0.363877		8.81802e-07	0.000558039	0.364156	0.0373474													0.140247	0.140249	23.3857	0.0427612	0.370188		1.16796e-06	0.000646045	0.370511	0.0427286		0.264252	-0.141693	23.1444	0.0432069	0.360774		1.18172e-06	0.000545182	0.361046	0.0512304
						-0.249753	0.151484	23.1615	0.0431751	0.364435		8.81073e-07	0.000557595	0.364714	0.0373463													0.13979	0.139792	23.385	0.0427624	0.370834		1.16796e-06	0.000646045	0.371157	0.0427286		0.264709	-0.141396	23.1438	0.0432081	0.361319		1.18098e-06	0.000544852	0.361591	0.0512291
						-0.250209	0.151164	23.161	0.043176	0.364993		8.80344e-07	0.000557152	0.365271	0.037345													0.139333	0.139335	23.3844	0.0427636	0.37148		1.16796e-06	0.000646045	0.371803	0.0427286		0.265165	-0.141099	23.1432	0.0432093	0.361864		1.18023e-06	0.000544522	0.362136	0.0512278
						-0.250666	0.150845	23.1605	0.0431769	0.36555		8.51332e-07	0.00055671	0.365828	0.0361429													0.138876	0.138878	23.3837	0.0427647	0.372126		1.16796e-06	0.000646045	0.372449	0.0427286		0.265622	-0.140802	23.1425	0.0432105	0.362408		1.13806e-06	0.000544191	0.36268	0.0494272
						-0.251123	0.150527	23.1601	0.0431778	0.366107		9.01324e-07	0.00055623	0.366385	0.0382983													0.138419	0.138422	23.3831	0.0427659	0.372772		1.14081e-06	0.000646045	0.373095	0.0417354		0.266079	-0.140507	23.1419	0.0432116	0.362953		1.20695e-06	0.000543828	0.363224	0.0524544
						-0.25158	0.15021	23.1596	0.0431787	0.366663		8.94269e-07	0.000555787	0.366941	0.0380289													0.137963	0.137965	23.3825	0.0427671	0.373418		1.11339e-06	0.000646045	0.373741	0.0407321		0.266536	-0.140212	23.1413	0.0432128	0.363496		1.20435e-06	0.000543481	0.363768	0.0523748
						-0.252037	0.149893	23.1591	0.0431796	0.367219		8.9361e-07	0.000555364	0.367496	0.0380298													0.137506	0.137508	23.3819	0.0427682	0.374064		1.11339e-06	0.000646045	0.374387	0.0407321		0.266993	-0.139917	23.1406	0.043214	0.36404		1.20369e-06	0.000543173	0.364311	0.0523758
						-0.252493	0.149577	23.1586	0.0431805	0.367774		8.9295e-07	0.000554942	0.368052	0.0380306													0.137049	0.137051	23.3813	0.0427693	0.37471		1.11339e-06	0.000646044	0.375033	0.0407321		0.267449	-0.139623	23.14	0.0432152	0.364583		1.20302e-06	0.000542863	0.364854	0.0523767
						-0.25295	0.149262	23.1581	0.0431813	0.368329		8.92289e-07	0.00055452	0.368606	0.0380314													0.136592	0.136594	23.3807	0.0427704	0.375356		1.11339e-06	0.000646044	0.375679	0.0407321		0.267906	-0.13933	23.1394	0.0432164	0.365126		1.20236e-06	0.000542552	0.365397	0.0523775
						-0.253407	0.148948	23.1577	0.0431822	0.368884		8.91628e-07	0.000554099	0.369161	0.0380321													0.136135	0.136138	23.38	0.0427715	0.376002		1.11339e-06	0.000646044	0.376325	0.0407321		0.268363	-0.139037	23.1387	0.0432176	0.365668		1.20168e-06	0.000542241	0.36594	0.0523784
						-0.253864	0.148634	23.1572	0.0431831	0.369438		9.5108e-07	0.000553678	0.369714	0.0405989													0.135678	0.135681	23.3794	0.0427726	0.376648		1.13406e-06	0.000646044	0.376971	0.0414884		0.26882	-0.138745	23.1381	0.0432188	0.366211		1.22659e-06	0.000541928	0.366482	0.0534946
						-0.254321	0.148322	23.1567	0.0431841	0.369991		9.88332e-07	0.000553257	0.370268	0.0422211													0.135222	0.135224	23.3788	0.0427738	0.377294		1.13411e-06	0.000646044	0.377617	0.0414904		0.269277	-0.138454	23.1374	0.04322	0.366753		1.31289e-06	0.000541614	0.367023	0.0572919
						-0.254778	0.14801	23.1562	0.0431851	0.370545		9.87576e-07	0.000552838	0.370821	0.0422208													0.134765	0.134767	23.3782	0.0427749	0.37794		1.13411e-06	0.000646044	0.378263	0.0414904		0.269734	-0.138163	23.1367	0.0432214	0.367294		1.31213e-06	0.0005413	0.367565	0.0572916
						-0.255234	0.147698	23.1556	0.0431861	0.371097		9.8682e-07	0.000552419	0.371374	0.0422205													0.134308	0.13431	23.3776	0.042776	0.378586		1.13411e-06	0.000646044	0.378909	0.0414904		0.27019	-0.137872	23.136	0.0432227	0.367836		1.31135e-06	0.000540986	0.368106	0.0572913
						-0.255691	0.147388	23.1551	0.043187	0.37165		9.86064e-07	0.000552001	0.371926	0.0422201													0.133851	0.133854	23.377	0.0427772	0.379232		1.13411e-06	0.000646044	0.379555	0.0414904		0.270647	-0.137583	23.1353	0.043224	0.368376		1.31058e-06	0.00054067	0.368647	0.0572909
						-0.256148	0.147078	23.1546	0.043188	0.372202		9.68934e-07	0.000551584	0.372478	0.041518													0.133394	0.133397	23.3763	0.0427783	0.379878		1.10679e-06	0.000646044	0.380201	0.040491		0.271104	-0.137293	23.1346	0.0432253	0.368917		1.30111e-06	0.000540355	0.369187	0.0569099
						-0.256605	0.146769	23.154	0.043189	0.372753		9.68117e-07	0.000551218	0.373029	0.0415105													0.132937	0.13294	23.3757	0.0427794	0.380524		1.07918e-06	0.000646044	0.380847	0.0394807		0.271561	-0.137005	23.1339	0.0432266	0.369458		1.28965e-06	0.000540071	0.369728	0.0564382
						-0.257062	0.14646	23.1535	0.04319	0.373305		1.06408e-06	0.000550872	0.37358	0.045654													0.132481	0.132483	23.3751	0.0427805	0.38117		1.07918e-06	0.000646044	0.381493	0.0394807		0.272018	-0.136717	23.1332	0.0432279	0.369998		1.34808e-06	0.000539826	0.370267	0.0590221
						-0.257519	0.146152	23.153	0.043191	0.373856		1.06337e-06	0.000550525	0.374131	0.0456521													0.132024	0.132026	23.3746	0.0427816	0.381817		1.07918e-06	0.000646044	0.38214	0.0394807		0.272475	-0.136429	23.1325	0.0432292	0.370537		1.40805e-06	0.000539578	0.370807	0.0616764
						-0.257975	0.145845	23.1524	0.0431921	0.374406		1.02544e-06	0.000550178	0.374681	0.0440517													0.131567	0.131569	23.374	0.0427826	0.382463		1.07918e-06	0.000646044	0.382786	0.0394807		0.272931	-0.136142	23.1317	0.0432306	0.371077		1.40736e-06	0.000539329	0.371347	0.0616746
						-0.258432	0.145539	23.1518	0.0431931	0.374956		1.002e-06	0.000549798	0.375231	0.0430742													0.13111	0.131113	23.3734	0.0427837	0.383109		1.07918e-06	0.000646043	0.383432	0.0394807		0.273388	-0.135855	23.131	0.043232	0.371616		1.38063e-06	0.000539078	0.371886	0.0605313
						-0.258889	0.145233	23.1513	0.0431941	0.375506		1.00131e-06	0.000549399	0.375781	0.043076													0.130653	0.130656	23.3728	0.0427848	0.383755		1.09818e-06	0.000646043	0.384078	0.0401759		0.273845	-0.135569	23.1303	0.0432334	0.372155		1.33789e-06	0.000538808	0.372425	0.0586868
						-0.259346	0.144927	23.1508	0.0431951	0.376055		1.00063e-06	0.000549	0.37633	0.0430778													0.130196	0.130199	23.3722	0.0427859	0.384401		1.09823e-06	0.000646043	0.384724	0.0401778		0.274302	-0.135283	23.1295	0.0432348	0.372694		1.33719e-06	0.000538508	0.372963	0.0586888
						-0.259803	0.144623	23.1502	0.0431961	0.376604		1.04845e-06	0.000548602	0.376879	0.0451695													0.12974	0.129742	23.3716	0.042787	0.385047		1.09823e-06	0.000646043	0.38537	0.0401778		0.274759	-0.134998	23.1288	0.0432361	0.373233		1.33649e-06	0.000538207	0.373502	0.0586907
						-0.26026	0.144319	23.1497	0.0431972	0.377153		1.10093e-06	0.000548204	0.377427	0.0474648													0.129283	0.129285	23.371	0.0427881	0.385693		1.09823e-06	0.000646043	0.386016	0.0401778		0.275216	-0.134714	23.1281	0.0432374	0.373771		1.42209e-06	0.000537905	0.37404	0.062485
						-0.260716	0.144016	23.1491	0.0431983	0.377701		1.10015e-06	0.000547807	0.377975	0.0474654													0.128826	0.128829	23.3704	0.0427892	0.386339		1.09823e-06	0.000646043	0.386662	0.0401778		0.275672	-0.13443	23.1273	0.0432389	0.374309		1.45356e-06	0.000537603	0.374578	0.0639036
						-0.261173	0.143714	23.1485	0.0431994	0.378249		1.08485e-06	0.00054741	0.378523	0.0468393													0.128369	0.128372	23.3698	0.0427903	0.386985		1.07083e-06	0.000646043	0.387308	0.0391754		0.276129	-0.134146	23.1266	0.0432403	0.374846		1.44546e-06	0.0005373	0.375115	0.0635835
						-0.26163	0.143412	23.1479	0.0432005	0.378796		1.07819e-06	0.000547064	0.37907	0.0465811													0.127912	0.127915	23.3692	0.0427914	0.387631		1.04311e-06	0.000646043	0.387954	0.0381613		0.276586	-0.133863	23.1258	0.0432418	0.375384		1.43572e-06	0.000537029	0.375652	0.0631867
						-0.262087	0.143111	23.1473	0.0432015	0.379344		1.07754e-06	0.000546738	0.379617	0.046581													0.127455	0.127458	23.3686	0.0427924	0.388277		1.04311e-06	0.000646043	0.3886	0.0381613		0.277043	-0.133581	23.125	0.0432432	0.375921		1.4351e-06	0.000536796	0.376189	0.0631869
						-0.262544	0.142811	23.1467	0.0432026	0.37989		1.07689e-06	0.000546411	0.380163	0.0465808													0.126999	0.127001	23.3681	0.0427934	0.388923		1.04311e-06	0.000646043	0.389246	0.0381613		0.2775	-0.133299	23.1243	0.0432446	0.376458		1.43448e-06	0.000536561	0.376726	0.0631871
						-0.263001	0.142511	23.1462	0.0432037	0.380437		1.16761e-06	0.000546084	0.38071	0.0505352													0.126542	0.126545	23.3675	0.0427945	0.389569		1.04311e-06	0.000646043	0.389892	0.0381613		0.277957	-0.133018	23.1235	0.0432461	0.376994		1.43385e-06	0.000536325	0.377262	0.0631872
						-0.263457	0.142212	23.1455	0.0432049	0.380983		1.18301e-06	0.000545755	0.381256	0.0512325													0.126085	0.126088	23.3669	0.0427955	0.390215		1.04311e-06	0.000646042	0.390538	0.0381613		0.278413	-0.132737	23.1227	0.0432475	0.37753		1.55091e-06	0.000536086	0.377798	0.0683764
						-0.263914	0.141913	23.1449	0.043206	0.381528		1.18227e-06	0.000545426	0.381801	0.0512313													0.125628	0.125631	23.3664	0.0427966	0.390861		1.06051e-06	0.000646042	0.391184	0.0387978		0.27887	-0.132456	23.1219	0.043249	0.378067		1.55913e-06	0.000535845	0.378334	0.0687695
						-0.264371	0.141615	23.1443	0.0432072	0.382074		1.18153e-06	0.000545096	0.382346	0.05123													0.125171	0.125174	23.3658	0.0427976	0.391507		1.06056e-06	0.000646042	0.39183	0.0387997		0.279327	-0.132176	23.1211	0.0432506	0.378602		1.5584e-06	0.000535603	0.37887	0.0687686
						-0.264828	0.141318	23.1436	0.0432084	0.382619		1.18078e-06	0.000544766	0.382891	0.0512287													0.124714	0.124717	23.3652	0.0427987	0.392153		1.06056e-06	0.000646042	0.392476	0.0387997		0.279784	-0.131897	23.1202	0.0432522	0.379138		1.55767e-06	0.00053536	0.379406	0.0687676
						-0.265285	0.141021	23.143	0.0432096	0.383164		1.18003e-06	0.000544436	0.383436	0.0512274													0.124258	0.12426	23.3646	0.0427998	0.392799		1.06056e-06	0.000646042	0.393122	0.0387997		0.280241	-0.131617	23.1194	0.0432537	0.379673		1.55693e-06	0.000535115	0.379941	0.0687665
						-0.265742	0.140725	23.1424	0.0432108	0.383708		1.1415e-06	0.000544105	0.38398	0.0495844													0.123801	0.123804	23.364	0.0428008	0.393445		1.06056e-06	0.000646042	0.393768	0.0387997		0.280698	-0.131339	23.1186	0.0432553	0.380208		1.55619e-06	0.000534868	0.380476	0.0687654
						-0.266198	0.140429	23.1418	0.0432119	0.384252		1.21001e-06	0.000543729	0.384524	0.0525967													0.123344	0.123347	23.3635	0.0428019	0.394091		1.03316e-06	0.000646042	0.394414	0.0377974		0.281154	-0.131061	23.1177	0.0432568	0.380743		1.56078e-06	0.000534621	0.381011	0.0690002
						-0.266655	0.140135	23.1411	0.0432131	0.384796		1.20418e-06	0.000543401	0.385068	0.0523751													0.122887	0.12289	23.3629	0.0428029	0.394737		1.00542e-06	0.000646042	0.39506	0.0367825		0.281611	-0.130783	23.1169	0.0432584	0.381278		1.63132e-06	0.000534405	0.381545	0.0721476
						-0.267112	0.13984	23.1405	0.0432143	0.385339		1.20352e-06	0.000543092	0.385611	0.052376													0.12243	0.122433	23.3623	0.0428039	0.395383		1.00542e-06	0.000646042	0.395706	0.0367825		0.282068	-0.130506	23.116	0.04326	0.381812		1.59556e-06	0.000534204	0.382079	0.0705928
						-0.267569	0.139547	23.1398	0.0432155	0.385883		1.20285e-06	0.000542782	0.386154	0.0523769													0.121974	0.121976	23.3618	0.0428049	0.396029		1.00542e-06	0.000646042	0.396352	0.0367825		0.282525	-0.130229	23.1152	0.0432616	0.382347		1.59492e-06	0.00053398	0.382614	0.0705941
						-0.268026	0.139253	23.1392	0.0432167	0.386425		1.20218e-06	0.000542471	0.386697	0.0523777													0.121517	0.12152	23.3613	0.0428059	0.396675		1.00542e-06	0.000646041	0.396999	0.0367825		0.282982	-0.129952	23.1143	0.0432632	0.382881		1.59427e-06	0.000533753	0.383147	0.0705953
						-0.268483	0.138961	23.1385	0.0432179	0.386968		1.20151e-06	0.000542159	0.387239	0.0523786													0.12106	0.121063	23.3607	0.0428069	0.397322		1.00542e-06	0.000646041	0.397645	0.0367825		0.283439	-0.129676	23.1135	0.0432648	0.383414		1.59362e-06	0.000533525	0.383681	0.0705966
						-0.268939	0.138669	23.1379	0.0432191	0.38751		1.25583e-06	0.000541846	0.387781	0.0547783													0.120603	0.120606	23.3602	0.0428079	0.397968		1.02128e-06	0.000646041	0.398291	0.0373628		0.283895	-0.129401	23.1126	0.0432664	0.383948		1.59296e-06	0.000533294	0.384214	0.0705978
						-0.269396	0.138378	23.1372	0.0432204	0.388052		1.31269e-06	0.000541532	0.388323	0.0572918													0.120146	0.120149	23.3596	0.042809	0.398614		1.02133e-06	0.000646041	0.398937	0.0373647		0.284352	-0.129125	23.1118	0.043268	0.384481		1.62536e-06	0.000533061	0.384748	0.0720653
						-0.269853	0.138087	23.1365	0.0432217	0.388593		1.31192e-06	0.000541218	0.388864	0.0572915													0.119689	0.119692	23.359	0.04281	0.39926		1.02133e-06	0.000646041	0.399583	0.0373647		0.284809	-0.128851	23.1109	0.0432696	0.385014		1.72637e-06	0.000532827	0.385281	0.0765777
						-0.27031	0.137797	23.1358	0.043223	0.389135		1.31115e-06	0.000540903	0.389405	0.0572912													0.119233	0.119236	23.3585	0.042811	0.399906		1.02133e-06	0.000646041	0.400229	0.0373647		0.285266	-0.128576	23.11	0.0432714	0.385547		1.72561e-06	0.000532591	0.385813	0.0765778
						-0.270767	0.137507	23.1351	0.0432243	0.389675		1.31038e-06	0.000540588	0.389946	0.0572908													0.118776	0.118779	23.3579	0.042812	0.400552		1.02133e-06	0.000646041	0.400875	0.0373647		0.285723	-0.128303	23.1091	0.0432731	0.38608		1.72484e-06	0.000532354	0.386346	0.0765778
						-0.271224	0.137218	23.1344	0.0432256	0.390216		1.29582e-06	0.000540273	0.390486	0.0566872													0.118319	0.118322	23.3574	0.042813	0.401198		9.94015e-07	0.000646041	0.401521	0.0363653		0.28618	-0.128029	23.1081	0.0432748	0.386612		1.71718e-06	0.000532115	0.386878	0.0762716
						-0.27168	0.136929	23.1337	0.0432269	0.390756		1.28949e-06	0.000540007	0.391026	0.056438													0.117862	0.117865	23.3568	0.042814	0.401844		9.6633e-07	0.000646041	0.402167	0.0353525		0.286636	-0.127756	23.1072	0.0432765	0.387144		1.70798e-06	0.000531908	0.38741	0.0758926
						-0.272137	0.136641	23.133	0.0432282	0.391296		1.37918e-06	0.000539761	0.391566	0.0603913													0.117405	0.117408	23.3563	0.042815	0.40249		9.6633e-07	0.000646041	0.402813	0.0353525		0.287093	-0.127484	23.1063	0.0432782	0.387676		1.70743e-06	0.000531741	0.387942	0.0758923
						-0.272594	0.136354	23.1323	0.0432296	0.391836		1.40787e-06	0.000539513	0.392106	0.0616759													0.116948	0.116951	23.3558	0.042816	0.403136		9.6633e-07	0.00064604	0.403459	0.0353525		0.28755	-0.127212	23.1054	0.0432799	0.388208		1.75914e-06	0.00053157	0.388473	0.0782156
						-0.273051	0.136067	23.1315	0.043231	0.392376		1.40718e-06	0.000539264	0.392645	0.0616742													0.116492	0.116495	23.3552	0.0428169	0.403782		9.6633e-07	0.00064604	0.404105	0.0353525		0.288007	-0.12694	23.1045	0.0432817	0.388739		1.8512e-06	0.000531397	0.389005	0.0823355
						-0.273508	0.13578	23.1308	0.0432324	0.392915		1.36266e-06	0.000539012	0.393184	0.0597507													0.116035	0.116038	23.3547	0.0428179	0.404428		9.66329e-07	0.00064604	0.404751	0.0353525		0.288464	-0.126669	23.1035	0.0432835	0.389271		1.85055e-06	0.000531221	0.389536	0.0823342
						-0.273964	0.135494	23.1301	0.0432338	0.393454		1.33771e-06	0.000538729	0.393723	0.0586873													0.115578	0.115581	23.3542	0.0428189	0.405074		9.80734e-07	0.00064604	0.405397	0.0358794		0.28892	-0.126398	23.1025	0.0432854	0.389802		1.8499e-06	0.000531043	0.390067	0.0823329
						-0.274421	0.135209	23.1293	0.0432351	0.393993		1.33701e-06	0.000538429	0.394262	0.0586893													0.115121	0.115124	23.3537	0.0428198	0.40572		9.80784e-07	0.00064604	0.406043	0.0358813		0.289377	-0.126127	23.1015	0.0432872	0.390333		1.84924e-06	0.000530862	0.390598	0.0823315
						-0.274878	0.134924	23.1286	0.0432364	0.394531		1.3363e-06	0.000538128	0.3948	0.0586912													0.114664	0.114667	23.3531	0.0428208	0.406366		9.80784e-07	0.00064604	0.406689	0.0358813		0.289834	-0.125856	23.1005	0.0432891	0.390864		1.8362e-06	0.000530679	0.391129	0.0817793
						-0.275335	0.134639	23.1279	0.0432378	0.395069		1.45288e-06	0.000537826	0.395338	0.0638471													0.114207	0.114211	23.3526	0.0428218	0.407012		9.80784e-07	0.00064604	0.407335	0.0358813		0.290291	-0.125586	23.0995	0.0432909	0.391394		1.76813e-06	0.000530487	0.39166	0.078776
						-0.275792	0.134356	23.1271	0.0432392	0.395607		1.45335e-06	0.000537524	0.395876	0.0639038													0.113751	0.113754	23.3521	0.0428228	0.407658		9.80783e-07	0.00064604	0.407981	0.0358813		0.290748	-0.125317	23.0986	0.0432927	0.391925		1.83264e-06	0.000530256	0.39219	0.0816856
						-0.276249	0.134072	23.1264	0.0432407	0.396145		1.44099e-06	0.000537221	0.396413	0.063396													0.113294	0.113297	23.3515	0.0428238	0.408304		9.53616e-07	0.00064604	0.408627	0.0348874		0.291205	-0.125047	23.0976	0.0432945	0.392455		1.90587e-06	0.000530024	0.39272	0.084987
						-0.276705	0.13379	23.1256	0.0432421	0.396682		1.43556e-06	0.000536968	0.39695	0.0631868													0.112837	0.11284	23.351	0.0428247	0.40895		9.26058e-07	0.000646039	0.409273	0.0338792		0.291661	-0.124779	23.0966	0.0432964	0.392985		1.89889e-06	0.000529824	0.39325	0.0847076
						-0.277162	0.133507	23.1248	0.0432436	0.397219		1.43494e-06	0.000536735	0.397487	0.063187													0.11238	0.112383	23.3505	0.0428257	0.409596		9.26058e-07	0.000646039	0.409919	0.0338792		0.292118	-0.12451	23.0956	0.0432983	0.393515		1.89833e-06	0.000529664	0.39378	0.0847083
						-0.277619	0.133226	23.1241	0.043245	0.397755		1.43431e-06	0.0005365	0.398024	0.0631871													0.111923	0.111927	23.35	0.0428266	0.410242		9.26058e-07	0.000646039	0.410565	0.0338792		0.292575	-0.124242	23.0946	0.0433002	0.394045		1.89776e-06	0.000529501	0.394309	0.0847089
						-0.278076	0.132944	23.1233	0.0432464	0.398292		1.45784e-06	0.000536262	0.39856	0.064252													0.111466	0.11147	23.3495	0.0428275	0.410888		9.26058e-07	0.000646039	0.411211	0.0338792		0.293032	-0.123975	23.0936	0.0433021	0.394574		1.89718e-06	0.000529335	0.394839	0.0847096
						-0.278533	0.132663	23.1225	0.0432479	0.398828		1.55966e-06	0.000536023	0.399096	0.0687702													0.11101	0.111013	23.349	0.0428284	0.411534		9.26057e-07	0.000646039	0.411857	0.0338792		0.293489	-0.123707	23.0925	0.043304	0.395104		1.89659e-06	0.000529166	0.395368	0.0847103
						-0.27899	0.132383	23.1217	0.0432495	0.399364		1.55894e-06	0.000535782	0.399632	0.0687693													0.110553	0.110556	23.3485	0.0428294	0.41218		9.39081e-07	0.000646039	0.412503	0.0343557		0.293946	-0.12344	23.0915	0.0433059	0.395633		1.97683e-06	0.000528994	0.395897	0.0883226
						-0.279446	0.132103	23.1208	0.043251	0.3999		1.55821e-06	0.00053554	0.400168	0.0687683													0.110096	0.110099	23.348	0.0428303	0.412826		9.3913e-07	0.000646039	0.41315	0.0343574		0.294402	-0.123173	23.0905	0.0433079	0.396162		2.05134e-06	0.00052882	0.396426	0.0916821
						-0.279903	0.131824	23.12	0.0432526	0.400436		1.55748e-06	0.000535296	0.400703	0.0687673													0.109639	0.109643	23.3474	0.0428312	0.413473		9.39129e-07	0.000646039	0.413796	0.0343574		0.294859	-0.122907	23.0894	0.04331	0.396691		2.05065e-06	0.000528643	0.396955	0.0916816
						-0.28036	0.131545	23.1192	0.0432541	0.400971		1.55674e-06	0.00053505	0.401238	0.0687662													0.109182	0.109186	23.3469	0.0428322	0.414119		9.39129e-07	0.000646039	0.414442	0.0343574		0.295316	-0.122641	23.0883	0.043312	0.397219		2.04994e-06	0.000528464	0.397483	0.0916811
						-0.280817	0.131266	23.1183	0.0432557	0.401506		1.556e-06	0.000534804	0.401773	0.0687651													0.108725	0.108729	23.3464	0.0428331	0.414765		9.39129e-07	0.000646038	0.415088	0.0343574		0.295773	-0.122375	23.0872	0.0433141	0.397748		2.04922e-06	0.000528282	0.398012	0.0916806
						-0.281274	0.130988	23.1175	0.0432572	0.402041		1.59106e-06	0.000534556	0.402308	0.0703472													0.108269	0.108272	23.3459	0.0428341	0.415411		9.12179e-07	0.000646038	0.415734	0.0333715		0.29623	-0.12211	23.0861	0.0433161	0.398276		2.04178e-06	0.000528099	0.39854	0.0913795
						-0.281731	0.13071	23.1167	0.0432588	0.402575		1.61152e-06	0.000534359	0.402842	0.0712779													0.107812	0.107815	23.3454	0.042835	0.416057		8.84811e-07	0.000646038	0.41638	0.0323703		0.296687	-0.121845	23.085	0.0433181	0.398804		2.03288e-06	0.000527948	0.399068	0.091007
						-0.282187	0.130433	23.1158	0.0432604	0.40311		1.5954e-06	0.000534146	0.403377	0.0705931													0.107355	0.107359	23.3449	0.0428358	0.416703		8.84811e-07	0.000646038	0.417026	0.0323703		0.297143	-0.12158	23.0839	0.0433202	0.399332		2.12729e-06	0.000527839	0.399596	0.095253
						-0.282644	0.130156	23.115	0.043262	0.403644		1.59475e-06	0.000533921	0.403911	0.0705944													0.106898	0.106902	23.3445	0.0428367	0.417349		8.84811e-07	0.000646038	0.417672	0.0323703		0.2976	-0.121316	23.0828	0.0433223	0.39986		2.20088e-06	0.000527726	0.400124	0.0985692
						-0.283101	0.12988	23.1141	0.0432636	0.404178		1.5941e-06	0.000533694	0.404445	0.0705957													0.106441	0.106445	23.344	0.0428376	0.417995		8.8481e-07	0.000646037	0.418318	0.0323703		0.298057	-0.121052	23.0816	0.0433245	0.400388		2.20036e-06	0.000527609	0.400651	0.0985678
						-0.283558	0.129604	23.1132	0.0432652	0.404711		1.59345e-06	0.000533465	0.404978	0.0705969													0.105984	0.105988	23.3435	0.0428385	0.418641		8.8481e-07	0.000646037	0.418964	0.0323703		0.298514	-0.120788	23.0805	0.0433267	0.400915		2.17281e-06	0.000527489	0.401179	0.0973561
						-0.284015	0.129329	23.1124	0.0432668	0.405245		1.59278e-06	0.000533233	0.405511	0.0705981													0.105528	0.105531	23.343	0.0428394	0.419287		8.96533e-07	0.000646037	0.41961	0.0327992		0.298971	-0.120524	23.0793	0.0433289	0.401443		2.1091e-06	0.000527352	0.401706	0.0945257
						-0.284472	0.129054	23.1115	0.0432684	0.405778		1.6604e-06	0.000533	0.406045	0.0736276													0.105071	0.105074	23.3425	0.0428403	0.419933		8.9658e-07	0.000646037	0.420256	0.0328009		0.299428	-0.120261	23.0782	0.043331	0.40197		2.10846e-06	0.000527182	0.402234	0.0945276
						-0.284928	0.128779	23.1107	0.0432701	0.406311		1.72617e-06	0.000532766	0.406577	0.0765777													0.104614	0.104618	23.342	0.0428412	0.420579		8.9658e-07	0.000646037	0.420902	0.0328009		0.299884	-0.119997	23.077	0.0433331	0.402497		2.10781e-06	0.00052701	0.402761	0.0945295
						-0.285385	0.128505	23.1097	0.0432718	0.406844		1.72541e-06	0.000532529	0.40711	0.0765778													0.104157	0.104161	23.3415	0.0428421	0.421225		8.9658e-07	0.000646037	0.421548	0.0328009		0.300341	-0.119735	23.0759	0.0433352	0.403024		2.20616e-06	0.000526834	0.403288	0.0989729
						-0.285842	0.128231	23.1088	0.0432735	0.407376		1.72464e-06	0.000532291	0.407643	0.0765778													0.1037	0.103704	23.341	0.042843	0.421871		8.96579e-07	0.000646037	0.422194	0.0328009		0.300798	-0.119472	23.0748	0.0433374	0.403551		2.27544e-06	0.000526656	0.403814	0.102116
						-0.286299	0.127958	23.1079	0.0432753	0.407909		1.71294e-06	0.000532052	0.408175	0.0760926													0.103243	0.103247	23.3406	0.0428439	0.422517		8.69904e-07	0.000646037	0.42284	0.031825		0.301255	-0.11921	23.0735	0.0433397	0.404078		2.26999e-06	0.000526476	0.404341	0.101906
						-0.286756	0.127685	23.107	0.043277	0.408441		1.70784e-06	0.000531865	0.408707	0.0758925													0.102787	0.10279	23.3401	0.0428447	0.423163		8.42783e-07	0.000646036	0.423486	0.0308328		0.301712	-0.118949	23.0723	0.043342	0.404604		2.26357e-06	0.00052633	0.404867	0.101646
						-0.287213	0.127413	23.1061	0.0432787	0.408973		1.70729e-06	0.000531697	0.409238	0.0758922													0.10233	0.102334	23.3396	0.0428456	0.423809		8.42783e-07	0.000646036	0.424132	0.0308328		0.302169	-0.118687	23.0711	0.0433442	0.40513		2.26313e-06	0.000526226	0.405394	0.101646
						-0.287669	0.127141	23.1052	0.0432804	0.409504		1.79686e-06	0.000531525	0.40977	0.0798993													0.101873	0.101877	23.3392	0.0428464	0.424455		8.42783e-07	0.000646036	0.424778	0.0308328		0.302625	-0.118426	23.0699	0.0433465	0.405657		2.26267e-06	0.000526118	0.40592	0.101646
						-0.288126	0.126869	23.1042	0.0432822	0.410036		1.85103e-06	0.000531351	0.410301	0.0823352													0.101416	0.10142	23.3387	0.0428473	0.425101		8.42782e-07	0.000646036	0.425424	0.0308328		0.303082	-0.118165	23.0687	0.0433487	0.406183		2.26219e-06	0.000526006	0.406446	0.101647
						-0.288583	0.126598	23.1032	0.043284	0.410567		1.85039e-06	0.000531175	0.410833	0.0823339													0.100959	0.100963	23.3383	0.0428481	0.425747		8.42782e-07	0.000646036	0.42607	0.0308328		0.303539	-0.117904	23.0675	0.043351	0.406709		2.37014e-06	0.00052589	0.406972	0.10652
						-0.28904	0.126327	23.1022	0.0432859	0.411098		1.84973e-06	0.000530996	0.411364	0.0823325													0.100503	0.100506	23.3378	0.042849	0.426393		8.53286e-07	0.000646035	0.426716	0.0312171		0.303996	-0.117644	23.0663	0.0433534	0.407235		2.44525e-06	0.000525771	0.407498	0.109921
						-0.289497	0.126056	23.1012	0.0432877	0.411629		1.84907e-06	0.000530814	0.411895	0.0823311													0.100046	0.10005	23.3373	0.0428498	0.427039		8.53331e-07	0.000646036	0.427362	0.0312187		0.304453	-0.117383	23.065	0.0433558	0.40776		2.44467e-06	0.000525649	0.408023	0.10992
						-0.289954	0.125786	23.1002	0.0432896	0.41216		1.81518e-06	0.000530631	0.412425	0.0808504													0.0995889	0.0995928	23.3369	0.0428507	0.427685		8.53331e-07	0.000646035	0.428008	0.0312187		0.30491	-0.117123	23.0637	0.0433583	0.408286		2.44407e-06	0.000525523	0.408549	0.10992
						-0.29041	0.125516	23.0993	0.0432914	0.412691		1.76795e-06	0.000530427	0.412956	0.0787767													0.099132	0.099136	23.3364	0.0428515	0.428331		8.53331e-07	0.000646035	0.428654	0.0312187		0.305366	-0.116864	23.0624	0.0433607	0.408812		2.44345e-06	0.000525394	0.409074	0.109919
						-0.290867	0.125246	23.0983	0.0432932	0.413221		1.87015e-06	0.000530196	0.413486	0.0833672													0.0986752	0.0986792	23.3359	0.0428524	0.428977		8.53331e-07	0.000646035	0.4293	0.0312187		0.305823	-0.116604	23.0611	0.0433632	0.409337		2.44282e-06	0.000525262	0.4096	0.109918
						-0.291324	0.124977	23.0973	0.043295	0.413751		1.90269e-06	0.000529963	0.414016	0.0848548													0.0982184	0.0982224	23.3355	0.0428532	0.429623		8.2698e-07	0.000646035	0.429946	0.0302547		0.30628	-0.116345	23.0598	0.0433656	0.409862		2.43528e-06	0.000525128	0.410125	0.109607
						-0.291781	0.124709	23.0963	0.0432969	0.414281		1.89875e-06	0.000529783	0.414546	0.0847078													0.0977615	0.0977656	23.335	0.042854	0.430269		8.00155e-07	0.000646034	0.430593	0.0292733		0.306737	-0.116086	23.0585	0.043368	0.410387		2.54184e-06	0.000525029	0.41065	0.114424
						-0.292238	0.12444	23.0953	0.0432988	0.414811		1.89819e-06	0.000529622	0.415076	0.0847084													0.0973047	0.0973088	23.3346	0.0428548	0.430916		8.00154e-07	0.000646034	0.431239	0.0292733		0.307194	-0.115827	23.0571	0.0433706	0.410912		2.62307e-06	0.000524973	0.411175	0.118094
						-0.292694	0.124172	23.0943	0.0433007	0.415341		1.89761e-06	0.000529458	0.415605	0.0847091													0.0968479	0.096852	23.3341	0.0428556	0.431562		8.00154e-07	0.000646034	0.431885	0.0292733		0.307651	-0.115569	23.0557	0.0433732	0.411437		2.52307e-06	0.000524911	0.4117	0.113605
						-0.293151	0.123905	23.0933	0.0433026	0.41587		1.89703e-06	0.000529291	0.416135	0.0847098													0.096391	0.0963952	23.3337	0.0428564	0.432208		8.00154e-07	0.000646034	0.432531	0.0292733		0.308107	-0.11531	23.0544	0.0433757	0.411962		2.52258e-06	0.000524802	0.412225	0.113606
						-0.293608	0.123637	23.0923	0.0433045	0.416399		1.89644e-06	0.000529121	0.416664	0.0847104													0.0959342	0.0959384	23.3333	0.0428572	0.432854		8.00154e-07	0.000646034	0.433177	0.0292733		0.308564	-0.115052	23.053	0.0433782	0.412487		2.52206e-06	0.000524689	0.41275	0.113608
						-0.294065	0.12337	23.0913	0.0433064	0.416929		2.01743e-06	0.000528949	0.417193	0.0901442													0.0954774	0.0954816	23.3328	0.042858	0.4335		8.09519e-07	0.000646033	0.433823	0.029616		0.309021	-0.114794	23.0517	0.0433808	0.413012		2.52153e-06	0.000524572	0.413274	0.113609
						-0.294522	0.123104	23.0902	0.0433084	0.417458		2.05116e-06	0.000528774	0.417722	0.091682													0.0950206	0.0950248	23.3324	0.0428589	0.434146		8.09563e-07	0.000646034	0.434469	0.0296176		0.309478	-0.114536	23.0504	0.0433833	0.413536		2.52098e-06	0.000524452	0.413799	0.11361
						-0.294979	0.122837	23.0891	0.0433105	0.417986		2.05046e-06	0.000528596	0.418251	0.0916815													0.0945637	0.094568	23.332	0.0428597	0.434792		8.09563e-07	0.000646033	0.435115	0.0296176		0.309935	-0.114278	23.049	0.0433858	0.414061		2.63098e-06	0.000524327	0.414323	0.118596
						-0.295435	0.122571	23.088	0.0433125	0.418515		2.04975e-06	0.000528417	0.418779	0.091681													0.0941069	0.0941112	23.3315	0.0428605	0.435438		8.09563e-07	0.000646033	0.435761	0.0296176		0.310391	-0.114021	23.0476	0.0433884	0.414585		2.72183e-06	0.0005242	0.414847	0.122721
						-0.295892	0.122306	23.0869	0.0433146	0.419043		2.04904e-06	0.000528235	0.419307	0.0916805													0.0936501	0.0936544	23.3311	0.0428613	0.436084		8.09562e-07	0.000646033	0.436407	0.0296176		0.310848	-0.113764	23.0462	0.0433912	0.415109		2.72116e-06	0.000524069	0.415371	0.122721
						-0.296349	0.122041	23.0858	0.0433166	0.419572		2.03767e-06	0.00052805	0.419836	0.0912036													0.0931932	0.0931976	23.3306	0.0428621	0.43673		7.83579e-07	0.000646033	0.437053	0.028667		0.311305	-0.113507	23.0447	0.0433939	0.415633		2.71585e-06	0.000523935	0.415895	0.122513
						-0.296806	0.121776	23.0847	0.0433187	0.4201		2.03277e-06	0.00052792	0.420364	0.0910068													0.0927364	0.0927408	23.3302	0.0428629	0.437376		7.57091e-07	0.000646032	0.437699	0.0276979		0.311762	-0.11325	23.0433	0.0433966	0.416157		2.70965e-06	0.000523838	0.416419	0.122256
						-0.297263	0.121511	23.0836	0.0433207	0.420628		2.1713e-06	0.00052781	0.420891	0.0972291													0.0922796	0.092284	23.3298	0.0428636	0.438022		7.5709e-07	0.000646032	0.438345	0.0276979		0.312219	-0.112994	23.0418	0.0433993	0.416681		2.70938e-06	0.000523786	0.416943	0.122256
						-0.29772	0.121247	23.0825	0.0433229	0.421155		2.20074e-06	0.000527696	0.421419	0.0985688													0.0918228	0.0918272	23.3294	0.0428644	0.438668		7.5709e-07	0.000646032	0.438991	0.0276979		0.312676	-0.112738	23.0404	0.043402	0.417205		2.70908e-06	0.00052373	0.417467	0.122256
						-0.298176	0.120983	23.0813	0.0433251	0.421683		2.20022e-06	0.000527578	0.421947	0.0985675													0.0913659	0.0913704	23.329	0.0428652	0.439314		7.5709e-07	0.000646031	0.439637	0.0276979		0.313132	-0.112482	23.039	0.0434047	0.417729		2.82039e-06	0.000523668	0.417991	0.127294
						-0.298633	0.120719	23.0801	0.0433273	0.422211		2.14912e-06	0.000527457	0.422474	0.0963002													0.0909091	0.0909136	23.3286	0.0428659	0.43996		7.57089e-07	0.000646031	0.440283	0.0276979		0.313589	-0.112226	23.0375	0.0434075	0.418252		2.93027e-06	0.000523602	0.418514	0.13227
						-0.29909	0.120455	23.079	0.0433294	0.422738		2.10893e-06	0.000527308	0.423002	0.0945262													0.0904523	0.0904568	23.3281	0.0428667	0.440606		7.65398e-07	0.000646031	0.440929	0.0280019		0.314046	-0.11197	23.0359	0.0434105	0.418776		2.92986e-06	0.000523532	0.419038	0.132269
						-0.299547	0.120192	23.0779	0.0433315	0.423265		2.10829e-06	0.000527138	0.423529	0.0945281													0.0899954	0.09	23.3277	0.0428674	0.441252		7.65441e-07	0.000646031	0.441575	0.0280035		0.314503	-0.111714	23.0344	0.0434134	0.4193		2.92943e-06	0.000523457	0.419561	0.132268
						-0.300004	0.119929	23.0768	0.0433336	0.423793		2.10764e-06	0.000526964	0.424056	0.09453													0.0895386	0.0895432	23.3273	0.0428682	0.441898		7.6544e-07	0.000646031	0.442221	0.0280035		0.31496	-0.111459	23.0328	0.0434163	0.419823		2.92897e-06	0.000523379	0.420085	0.132267
						-0.300461	0.119666	23.0756	0.0433358	0.42432		2.25014e-06	0.000526788	0.424583	0.100955													0.0890818	0.0890865	23.3269	0.042869	0.442544		7.6544e-07	0.000646031	0.442867	0.0280035		0.315417	-0.111203	23.0313	0.0434193	0.420346		2.92849e-06	0.000523297	0.420608	0.132266
						-0.300917	0.119404	23.0744	0.043338	0.424846		2.27524e-06	0.000526609	0.42511	0.102116													0.0886249	0.0886297	23.3265	0.0428697	0.44319		7.6544e-07	0.00064603	0.443513	0.0280035		0.315873	-0.110948	23.0297	0.0434222	0.42087		2.92799e-06	0.000523211	0.421131	0.132266
						-0.301374	0.119142	23.0732	0.0433403	0.425373		2.26705e-06	0.000526428	0.425636	0.101783													0.0881681	0.0881729	23.3261	0.0428705	0.443836		7.39859e-07	0.00064603	0.444159	0.0270676		0.31633	-0.110693	23.0281	0.0434251	0.421393		2.97485e-06	0.000523121	0.421654	0.134405
						-0.301831	0.11888	23.072	0.0433425	0.425899		2.26346e-06	0.000526303	0.426162	0.101646													0.0877113	0.0877161	23.3257	0.0428712	0.444482		7.1374e-07	0.00064603	0.444805	0.0261121		0.316787	-0.110438	23.0266	0.0434281	0.421916		3.03334e-06	0.00052305	0.422178	0.137067
						-0.302288	0.118619	23.0708	0.0433448	0.426426		2.26301e-06	0.000526198	0.426689	0.101646													0.0872545	0.0872593	23.3253	0.0428719	0.445128		7.1374e-07	0.000646029	0.445451	0.0261121		0.317244	-0.110183	23.025	0.0434311	0.422439		3.03306e-06	0.000523	0.422701	0.137067
						-0.302745	0.118358	23.0696	0.0433471	0.426952		2.26255e-06	0.000526089	0.427215	0.101646													0.0867976	0.0868025	23.3249	0.0428727	0.445774		7.13739e-07	0.000646029	0.446097	0.0261121		0.317701	-0.109929	23.0234	0.0434342	0.422962		3.03276e-06	0.000522945	0.423224	0.137068
						-0.303202	0.118097	23.0684	0.0433493	0.427478		2.26207e-06	0.000525976	0.427741	0.101647													0.0863408	0.0863457	23.3245	0.0428734	0.44642		7.13739e-07	0.000646029	0.446743	0.0261121		0.318158	-0.109674	23.0217	0.0434372	0.423485		3.03242e-06	0.000522884	0.423746	0.137069
						-0.303658	0.117836	23.0672	0.0433516	0.428004		2.41811e-06	0.000525859	0.428267	0.108683													0.085884	0.0858889	23.3241	0.0428741	0.447066		7.13738e-07	0.000646028	0.447389	0.0261121		0.318614	-0.10942	23.0201	0.0434402	0.424008		3.03206e-06	0.000522819	0.424269	0.137069
						-0.304115	0.117576	23.0659	0.043354	0.42853		2.4451e-06	0.000525739	0.428793	0.109921													0.0854271	0.0854321	23.3237	0.0428748	0.447712		7.2107e-07	0.000646028	0.448035	0.0263803		0.319071	-0.109165	23.0185	0.0434433	0.424531		3.03167e-06	0.000522749	0.424792	0.13707
						-0.304572	0.117316	23.0646	0.0433565	0.429056		2.44451e-06	0.000525616	0.429318	0.10992													0.0849703	0.0849753	23.3233	0.0428755	0.448358		7.21111e-07	0.000646029	0.448681	0.0263818		0.319528	-0.108911	23.0169	0.0434463	0.425053		3.12589e-06	0.000522675	0.425315	0.14135
						-0.305029	0.117056	23.0633	0.0433589	0.429581		2.44391e-06	0.00052549	0.429844	0.109919													0.0845135	0.0845185	23.3229	0.0428762	0.449004		7.2111e-07	0.000646028	0.449327	0.0263818		0.319985	-0.108657	23.0153	0.0434494	0.425576		3.2778e-06	0.000522596	0.425837	0.148242
						-0.305486	0.116796	23.062	0.0433614	0.430107		2.44329e-06	0.00052536	0.430369	0.109919													0.0840566	0.0840617	23.3225	0.042877	0.44965		7.2111e-07	0.000646028	0.449973	0.0263818		0.320442	-0.108404	23.0135	0.0434527	0.426099		3.27728e-06	0.000522513	0.42636	0.148241
						-0.305943	0.116536	23.0607	0.0433638	0.430632		2.44265e-06	0.000525227	0.430895	0.109918													0.0835998	0.0836049	23.3222	0.0428777	0.450296		7.21109e-07	0.000646028	0.450619	0.0263818		0.320899	-0.10815	23.0118	0.043456	0.426621		3.27673e-06	0.000522426	0.426882	0.148241
						-0.306399	0.116277	23.0594	0.0433662	0.431157		2.43108e-06	0.000525092	0.43142	0.109425													0.083143	0.0831481	23.3218	0.0428784	0.450942		6.9596e-07	0.000646027	0.451265	0.0254617		0.321355	-0.107896	23.0101	0.0434593	0.427144		3.2711e-06	0.000522335	0.427405	0.148012
						-0.306856	0.116018	23.0581	0.0433687	0.431682		2.59424e-06	0.000525014	0.431945	0.116787													0.0826862	0.0826913	23.3214	0.0428791	0.451589		6.70234e-07	0.000646027	0.451912	0.0245205		0.321812	-0.107643	23.0083	0.0434625	0.427666		3.26452e-06	0.000522285	0.427927	0.147729
						-0.307313	0.11576	23.0567	0.0433713	0.432207		2.59597e-06	0.000524957	0.43247	0.116877													0.0822293	0.0822346	23.321	0.0428798	0.452235		6.70234e-07	0.000646026	0.452558	0.0245205		0.322269	-0.10739	23.0066	0.0434658	0.428188		3.26451e-06	0.000522283	0.428449	0.147729
						-0.30777	0.115501	23.0554	0.0433739	0.432732		2.52295e-06	0.000524883	0.432995	0.113606													0.0817725	0.0817778	23.3207	0.0428804	0.452881		6.70234e-07	0.000646026	0.453204	0.0245205		0.322726	-0.107137	23.0049	0.0434691	0.428711		3.34871e-06	0.000522276	0.428972	0.151541
						-0.308227	0.115242	23.054	0.0433764	0.433257		2.52245e-06	0.000524773	0.43352	0.113607													0.0813157	0.081321	23.3203	0.0428811	0.453527		6.70233e-07	0.000646026	0.45385	0.0245205		0.323183	-0.106884	23.0031	0.0434724	0.429233		3.53802e-06	0.000522264	0.429494	0.160112
						-0.308684	0.114984	23.0527	0.0433789	0.433782		2.52192e-06	0.000524659	0.434044	0.113608													0.0808588	0.0808642	23.3199	0.0428818	0.454173		6.70233e-07	0.000646025	0.454496	0.0245205		0.32364	-0.106631	23.0012	0.0434759	0.429755		3.5379e-06	0.000522246	0.430016	0.160112
						-0.30914	0.114726	23.0513	0.0433814	0.434307		2.52139e-06	0.000524541	0.434569	0.113609													0.080402	0.0804074	23.3196	0.0428825	0.454819		6.76665e-07	0.000646025	0.455142	0.0247559		0.324096	-0.106378	22.9994	0.0434795	0.430277		3.53773e-06	0.000522223	0.430538	0.160112
						-0.309597	0.114468	23.05	0.0433839	0.434831		2.52083e-06	0.00052442	0.435093	0.113611													0.0799452	0.0799506	23.3192	0.0428831	0.455465		6.76704e-07	0.000646025	0.455788	0.0247573		0.324553	-0.106125	22.9975	0.043483	0.4308		3.53754e-06	0.000522195	0.431061	0.160111
						-0.310054	0.114211	23.0487	0.0433865	0.435356		2.68361e-06	0.000524295	0.435618	0.120976													0.0794884	0.0794938	23.3188	0.0428838	0.456111		6.76703e-07	0.000646025	0.456434	0.0247573		0.32501	-0.105872	22.9956	0.0434866	0.431322		3.5373e-06	0.000522162	0.431583	0.160111
						-0.310511	0.113954	23.0472	0.0433892	0.43588		2.72166e-06	0.000524166	0.436142	0.122721													0.0790315	0.079037	23.3185	0.0428845	0.456757		6.76703e-07	0.000646025	0.45708	0.0247573		0.325467	-0.105619	22.9937	0.0434901	0.431844		3.45098e-06	0.000522125	0.432105	0.156215
						-0.310968	0.113697	23.0458	0.0433919	0.436404		2.72098e-06	0.000524035	0.436666	0.122721													0.0785747	0.0785803	23.3181	0.0428852	0.457403		6.76702e-07	0.000646024	0.457726	0.0247573		0.325924	-0.105366	22.9919	0.0434935	0.432366		3.46539e-06	0.000522052	0.432627	0.156889
						-0.311425	0.11344	23.0443	0.0433946	0.436928		2.71298e-06	0.0005239	0.43719	0.122392													0.0781179	0.0781235	23.3177	0.0428858	0.458049		6.52004e-07	0.000646024	0.458372	0.0238537		0.326381	-0.105113	22.9901	0.043497	0.432888		3.67717e-06	0.000521957	0.433149	0.166507
						-0.311881	0.113183	23.0429	0.0433973	0.437452		2.70958e-06	0.000523825	0.437714	0.122256													0.077661	0.0776667	23.3174	0.0428865	0.458695		6.26689e-07	0.000646023	0.459018	0.0229276		0.326837	-0.104861	22.9881	0.0435007	0.43341		3.67477e-06	0.000521904	0.433671	0.166415
						-0.312338	0.112927	23.0415	0.0434	0.437976		2.7093e-06	0.000523772	0.438238	0.122256													0.0772042	0.0772099	23.317	0.0428871	0.459341		6.26689e-07	0.000646023	0.459664	0.0229276		0.327294	-0.104608	22.9862	0.0435044	0.433932		3.67477e-06	0.000521904	0.434193	0.166415
						-0.312795	0.112671	23.04	0.0434027	0.4385		2.709e-06	0.000523714	0.438761	0.122256													0.0767474	0.0767531	23.3167	0.0428877	0.459987		6.26688e-07	0.000646022	0.46031	0.0229276		0.327751	-0.104356	22.9843	0.043508	0.434454		3.67473e-06	0.000521898	0.434715	0.166415
						-0.313252	0.112415	23.0386	0.0434054	0.439023		2.87827e-06	0.000523651	0.439285	0.12991													0.0762905	0.0762963	23.3163	0.0428884	0.460633		6.26688e-07	0.000646022	0.460956	0.0229276		0.328208	-0.104104	22.9823	0.0435117	0.434976		3.67464e-06	0.000521885	0.435237	0.166416
						-0.313709	0.112159	23.0371	0.0434083	0.439547		2.93016e-06	0.000523584	0.439809	0.132269													0.0758337	0.0758395	23.316	0.042889	0.461279		6.26688e-07	0.000646021	0.461602	0.0229276		0.328665	-0.103851	22.9804	0.0435154	0.435498		3.67451e-06	0.000521866	0.435759	0.166416
						-0.314165	0.111903	23.0355	0.0434112	0.44007		2.92975e-06	0.000523513	0.440332	0.132269													0.0753769	0.0753828	23.3157	0.0428896	0.461925		6.32295e-07	0.000646021	0.462248	0.0231328		0.329121	-0.103599	22.9784	0.0435191	0.43602		3.71843e-06	0.000521842	0.43628	0.168413
						-0.314622	0.111647	23.034	0.0434142	0.440594		2.92931e-06	0.000523437	0.440856	0.132268													0.0749201	0.074926	23.3153	0.0428903	0.462571		6.32332e-07	0.000646022	0.462894	0.0231341		0.329578	-0.103347	22.9765	0.0435228	0.436541		3.98373e-06	0.000521813	0.436802	0.180439
						-0.315079	0.111392	23.0324	0.0434171	0.441117		2.92885e-06	0.000523358	0.441379	0.132267													0.0744632	0.0744692	23.315	0.0428909	0.463217		6.32332e-07	0.000646021	0.46354	0.0231341		0.330035	-0.103095	22.9744	0.0435268	0.437063		3.98346e-06	0.000521778	0.437324	0.180438
						-0.315536	0.111136	23.0308	0.04342	0.441641		2.92836e-06	0.000523275	0.441902	0.132266													0.0740064	0.0740124	23.3146	0.0428915	0.463863		6.32331e-07	0.000646021	0.464186	0.0231341		0.330492	-0.102842	22.9723	0.0435307	0.437585		3.98315e-06	0.000521737	0.437846	0.180438
						-0.315993	0.110881	23.0293	0.043423	0.442164		2.92786e-06	0.000523188	0.442426	0.132265													0.0735496	0.0735556	23.3143	0.0428922	0.464509		6.32331e-07	0.00064602	0.464832	0.0231341		0.330949	-0.10259	22.9702	0.0435347	0.438107		3.9828e-06	0.000521692	0.438368	0.180438
						-0.31645	0.110626	23.0277	0.0434259	0.442687		3.00249e-06	0.000523097	0.442949	0.13566													0.0730927	0.0730988	23.3139	0.0428928	0.465155		6.08097e-07	0.00064602	0.465478	0.0222475		0.331406	-0.102338	22.9681	0.0435387	0.438628		3.97606e-06	0.000521642	0.438889	0.18015
						-0.316906	0.110371	23.0261	0.0434289	0.44321		3.03327e-06	0.000523037	0.443472	0.137067													0.0726359	0.0726421	23.3136	0.0428934	0.465801		5.83203e-07	0.000646019	0.466124	0.0213367		0.331862	-0.102087	22.966	0.0435427	0.43915		3.96817e-06	0.000521638	0.439411	0.179794
						-0.317363	0.110117	23.0245	0.0434319	0.443733		3.03299e-06	0.000522986	0.443995	0.137067													0.0721791	0.0721853	23.3133	0.042894	0.466447		5.83202e-07	0.000646019	0.46677	0.0213367		0.332319	-0.101835	22.9639	0.0435467	0.439672		3.98686e-06	0.000521689	0.439933	0.180623
						-0.31782	0.109862	23.0229	0.043435	0.444256		3.03267e-06	0.000522929	0.444518	0.137068													0.0717222	0.0717285	23.313	0.0428946	0.467093		5.83202e-07	0.000646018	0.467416	0.0213367		0.332776	-0.101583	22.9618	0.0435506	0.440193		4.31524e-06	0.000521733	0.440454	0.195484
						-0.318277	0.109608	23.0213	0.043438	0.444779		3.03233e-06	0.000522868	0.445041	0.137069													0.0712654	0.0712717	23.3127	0.0428951	0.467739		5.83201e-07	0.000646017	0.468062	0.0213367		0.333233	-0.101331	22.9595	0.043555	0.440715		4.31556e-06	0.00052177	0.440976	0.195485
						-0.318734	0.109353	23.0197	0.043441	0.445302		3.03196e-06	0.000522802	0.445564	0.137069													0.0708086	0.070815	23.3123	0.0428957	0.468385		5.83201e-07	0.000646017	0.468708	0.0213367		0.33369	-0.101079	22.9572	0.0435593	0.441237		4.31583e-06	0.000521801	0.441498	0.195485
						-0.319191	0.109099	23.0181	0.0434441	0.445825		3.03156e-06	0.00052273	0.446086	0.13707													0.0703518	0.0703582	23.312	0.0428963	0.469031		5.88057e-07	0.000646016	0.469354	0.0215144		0.334147	-0.100827	22.955	0.0435636	0.441759		4.31605e-06	0.000521826	0.44202	0.195486
						-0.319647	0.108845	23.0165	0.0434471	0.446348		3.19031e-06	0.000522655	0.446609	0.144269													0.0698949	0.0699014	23.3117	0.0428969	0.469677		5.88092e-07	0.000646017	0.47	0.0215157		0.334603	-0.100574	22.9527	0.0435679	0.442281		4.1996e-06	0.000521844	0.442541	0.190204
						-0.320104	0.108591	23.0148	0.0434503	0.44687		3.27767e-06	0.000522575	0.447132	0.148242													0.0694381	0.0694446	23.3114	0.0428975	0.470323		5.88091e-07	0.000646016	0.470646	0.0215157		0.33506	-0.100322	22.9505	0.0435721	0.442802		4.15291e-06	0.000521819	0.443063	0.188099
						-0.320561	0.108337	23.0131	0.0434536	0.447393		3.27714e-06	0.000522491	0.447654	0.148241													0.0689813	0.0689879	23.3111	0.0428981	0.470969		5.88091e-07	0.000646016	0.471292	0.0215157		0.335517	-0.10007	22.9483	0.0435763	0.443324		4.15257e-06	0.000521774	0.443585	0.1881
						-0.321018	0.108084	23.0113	0.0434568	0.447915		3.27658e-06	0.000522403	0.448177	0.148241													0.0685244	0.0685311	23.3108	0.0428987	0.471615		5.8809e-07	0.000646015	0.471938	0.0215157		0.335974	-0.0998179	22.9461	0.0435804	0.443846		4.49342e-06	0.000521723	0.444107	0.20356
						-0.321475	0.10783	23.0096	0.0434601	0.448438		3.26799e-06	0.000522311	0.448699	0.147879													0.0680676	0.0680743	23.3104	0.0428992	0.472261		5.64328e-07	0.000646014	0.472584	0.0206463		0.336431	-0.0995659	22.9437	0.0435849	0.444368		4.50305e-06	0.000521666	0.444628	0.204018
						-0.321932	0.107577	23.0079	0.0434634	0.44896		3.26452e-06	0.000522285	0.449221	0.147729													0.0676108	0.0676175	23.3101	0.0428998	0.472907		5.39856e-07	0.000646014	0.47323	0.019751		0.336888	-0.099314	22.9414	0.0435894	0.444889		4.50014e-06	0.000521658	0.44515	0.203889
						-0.322388	0.107324	23.0061	0.0434666	0.449482		3.2645e-06	0.000522282	0.449744	0.147729													0.067154	0.0671608	23.3098	0.0429004	0.473553		5.39855e-07	0.000646013	0.473876	0.019751		0.337344	-0.0990622	22.939	0.0435939	0.445411		4.50057e-06	0.000521709	0.445672	0.203889
						-0.322845	0.107071	23.0044	0.0434699	0.450005		3.42018e-06	0.000522274	0.450266	0.154776													0.0666971	0.066704	23.3095	0.0429009	0.474199		5.39855e-07	0.000646013	0.474522	0.019751		0.337801	-0.0988102	22.9366	0.0435984	0.445933		4.50094e-06	0.000521752	0.446194	0.203889
						-0.323302	0.106818	23.0026	0.0434733	0.450527		3.538e-06	0.00052226	0.450788	0.160112													0.0662403	0.0662472	23.3092	0.0429014	0.474845		5.39854e-07	0.000646012	0.475168	0.019751		0.338258	-0.0985581	22.9343	0.0436029	0.446454		4.50124e-06	0.000521788	0.446715	0.203888
						-0.323759	0.106565	23.0007	0.0434769	0.451049		3.53786e-06	0.000522241	0.45131	0.160112													0.0657835	0.0657905	23.309	0.042902	0.475491		5.39853e-07	0.000646011	0.475814	0.019751		0.338715	-0.098306	22.9319	0.0436074	0.446976		4.50149e-06	0.000521817	0.447237	0.203888
						-0.324216	0.106311	22.9989	0.0434804	0.451571		3.53769e-06	0.000522216	0.451833	0.160112													0.0653266	0.0653337	23.3087	0.0429025	0.476137		5.44028e-07	0.000646011	0.47646	0.0199038		0.339172	-0.0980538	22.9295	0.0436119	0.447498		4.85122e-06	0.000521839	0.447759	0.21972
						-0.324673	0.106058	22.997	0.0434839	0.452094		3.53748e-06	0.000522187	0.452355	0.160111													0.0648698	0.0648769	23.3084	0.0429031	0.476783		5.44061e-07	0.000646011	0.477106	0.019905		0.339629	-0.0978016	22.927	0.0436168	0.44802		4.90096e-06	0.000521854	0.448281	0.221966
						-0.325129	0.105805	22.9951	0.0434875	0.452616		3.53724e-06	0.000522153	0.452877	0.160111													0.064413	0.0644201	23.3081	0.0429036	0.477429		5.44061e-07	0.00064601	0.477752	0.019905		0.340085	-0.0975493	22.9244	0.0436217	0.448542		4.90105e-06	0.000521863	0.448803	0.221966
						-0.325586	0.105553	22.9933	0.043491	0.453138		3.4158e-06	0.000522114	0.453399	0.154625													0.0639561	0.0639634	23.3078	0.0429041	0.478075		5.4406e-07	0.00064601	0.478398	0.019905		0.340542	-0.097297	22.9218	0.0436266	0.449064		4.90107e-06	0.000521866	0.449325	0.221966
						-0.326043	0.1053	22.9915	0.0434944	0.45366		3.53769e-06	0.000522027	0.453921	0.16017													0.0634993	0.0635066	23.3075	0.0429047	0.478721		5.44059e-07	0.000646009	0.479044	0.019905		0.340999	-0.0970447	22.9192	0.0436315	0.449585		4.90104e-06	0.000521862	0.449846	0.221966
						-0.3265	0.105047	22.9896	0.043498	0.454182		3.67603e-06	0.000521931	0.454443	0.166464													0.0630425	0.0630498	23.3072	0.0429052	0.479367		5.20769e-07	0.000646008	0.47969	0.0190529		0.341456	-0.0967925	22.9167	0.0436364	0.450107		4.892e-06	0.000521853	0.450368	0.22156
						-0.326957	0.104795	22.9876	0.0435016	0.454704		3.67478e-06	0.000521905	0.454965	0.166415													0.0625857	0.0625931	23.3069	0.0429058	0.480013		4.96713e-07	0.000646007	0.480336	0.0181728		0.341913	-0.0965402	22.9141	0.0436413	0.450629		4.88132e-06	0.000521896	0.45089	0.221059
						-0.327414	0.104542	22.9857	0.0435053	0.455226		3.67476e-06	0.000521903	0.455487	0.166415													0.0621288	0.0621363	23.3066	0.0429063	0.480659		4.96712e-07	0.000646007	0.480982	0.0181728		0.34237	-0.0962878	22.9115	0.0436461	0.451151		5.2387e-06	0.000522002	0.451412	0.237195
						-0.32787	0.10429	22.9838	0.043509	0.455748		3.67471e-06	0.000521895	0.456009	0.166416													0.061672	0.0616796	23.3064	0.0429067	0.481305		4.96712e-07	0.000646006	0.481628	0.0181728		0.342826	-0.0960353	22.9088	0.0436514	0.451673		5.33487e-06	0.0005221	0.451934	0.241504
						-0.328327	0.104038	22.9818	0.0435127	0.45627		3.67461e-06	0.000521881	0.456531	0.166416													0.0612152	0.0612228	23.3061	0.0429072	0.481951		4.96711e-07	0.000646005	0.482274	0.0181728		0.343283	-0.0957825	22.906	0.0436567	0.452195		5.33585e-06	0.000522189	0.452456	0.241507
						-0.328784	0.103785	22.9799	0.0435163	0.456792		3.67448e-06	0.000521861	0.457053	0.166416													0.0607583	0.060766	23.3058	0.0429077	0.482597		4.9671e-07	0.000646004	0.48292	0.0181728		0.34374	-0.0955295	22.9032	0.043662	0.452717		5.17561e-06	0.000522272	0.452979	0.234217
						-0.329241	0.103533	22.9779	0.04352	0.457314		3.79927e-06	0.000521835	0.457574	0.172076													0.0603015	0.0603093	23.3055	0.0429082	0.483243		5.0027e-07	0.000646003	0.483566	0.0183031		0.344197	-0.0952764	22.9005	0.0436672	0.45324		5.13406e-06	0.0005223	0.453501	0.232324
						-0.329698	0.103281	22.9759	0.0435238	0.457835		3.98366e-06	0.000521804	0.458096	0.180438													0.0598447	0.0598525	23.3053	0.0429087	0.483889		5.00301e-07	0.000646004	0.484212	0.0183042		0.344654	-0.0950232	22.8978	0.0436724	0.453762		5.13413e-06	0.000522308	0.454023	0.232324
						-0.330155	0.103029	22.9738	0.0435278	0.458357		3.98338e-06	0.000521768	0.458618	0.180438													0.0593878	0.0593958	23.305	0.0429092	0.484535		5.00301e-07	0.000646003	0.484858	0.0183042		0.345111	-0.09477	22.8951	0.0436775	0.454284		5.13414e-06	0.000522309	0.454545	0.232324
						-0.330611	0.102777	22.9717	0.0435318	0.458879		3.98306e-06	0.000521726	0.45914	0.180438													0.058931	0.058939	23.3047	0.0429097	0.485181		5.003e-07	0.000646002	0.485504	0.0183042		0.345567	-0.0945168	22.8924	0.0436826	0.454807		5.46458e-06	0.000522304	0.455068	0.247279
						-0.331068	0.102525	22.9696	0.0435358	0.459401		3.9827e-06	0.00052168	0.459662	0.180438													0.0584742	0.0584823	23.3045	0.0429102	0.485827		5.00299e-07	0.000646001	0.48615	0.0183042		0.346024	-0.0942636	22.8895	0.0436881	0.455329		5.59927e-06	0.000522291	0.45559	0.25338
						-0.331525	0.102273	22.9675	0.0435397	0.459922		3.97224e-06	0.000521629	0.460183	0.179982													0.0580174	0.0580255	23.3042	0.0429107	0.486473		4.77477e-07	0.000646	0.486796	0.0174692		0.346481	-0.0940104	22.8866	0.0436937	0.455851		5.59514e-06	0.000522273	0.456112	0.253202
						-0.331982	0.102021	22.9654	0.0435437	0.460444		3.96827e-06	0.000521652	0.460705	0.179794													0.0575605	0.0575687	23.3039	0.0429112	0.487119		4.53823e-07	0.000645999	0.487442	0.0166038		0.346938	-0.0937573	22.8837	0.0436993	0.456373		5.59066e-06	0.000522309	0.456635	0.252982
						-0.332439	0.101769	22.9633	0.0435477	0.460966		4.07743e-06	0.000521701	0.461226	0.184722													0.0571037	0.057112	23.3037	0.0429117	0.487765		4.53823e-07	0.000645998	0.488088	0.0166038		0.347395	-0.0935041	22.8807	0.0437049	0.456896		5.59177e-06	0.000522414	0.457157	0.252981
						-0.332896	0.101517	22.9612	0.0435518	0.461487		4.31533e-06	0.000521743	0.461748	0.195484													0.0566469	0.0566552	23.3034	0.0429121	0.488411		4.53822e-07	0.000645997	0.488734	0.0166038		0.347852	-0.0932507	22.8778	0.0437105	0.457418		5.59278e-06	0.000522509	0.457679	0.252981
						-0.333352	0.101265	22.9589	0.0435561	0.462009		4.31564e-06	0.000521779	0.46227	0.195485													0.05619	0.0561985	23.3032	0.0429126	0.489057		4.53821e-07	0.000645996	0.48938	0.0166038		0.348308	-0.0929971	22.8749	0.0437161	0.457941		5.59369e-06	0.000522596	0.458202	0.25298
						-0.333809	0.101013	22.9566	0.0435604	0.462531		4.3159e-06	0.000521808	0.462792	0.195485													0.0557332	0.0557418	23.3029	0.042913	0.489703		4.53821e-07	0.000645995	0.490026	0.0166038		0.348765	-0.0927433	22.872	0.0437216	0.458463		5.93215e-06	0.000522674	0.458725	0.268247
						-0.334266	0.100761	22.9544	0.0435647	0.463053		4.3161e-06	0.000521831	0.463314	0.195486													0.0552764	0.055285	23.3027	0.0429135	0.490349		4.56829e-07	0.000645994	0.490672	0.0167139		0.349222	-0.0924893	22.8689	0.0437276	0.458986		6.12714e-06	0.000522744	0.459247	0.277027
						-0.334723	0.100509	22.9521	0.043569	0.463574		4.15703e-06	0.000521848	0.463835	0.188275													0.0548196	0.0548283	23.3024	0.0429139	0.490995		4.56858e-07	0.000645995	0.491318	0.016715		0.349679	-0.0922352	22.8657	0.0437337	0.459509		6.12789e-06	0.000522806	0.45977	0.277028
						-0.33518	0.100256	22.9499	0.0435732	0.464096		4.15282e-06	0.000521808	0.464357	0.188099													0.0543627	0.0543715	23.3022	0.0429144	0.491641		4.56857e-07	0.000645993	0.491964	0.016715		0.350136	-0.091981	22.8625	0.0437398	0.460031		6.12854e-06	0.00052286	0.460293	0.277029
						-0.335636	0.100004	22.9477	0.0435773	0.464618		4.23248e-06	0.000521761	0.464879	0.191724													0.0539059	0.0539148	23.302	0.0429149	0.492287		4.56856e-07	0.000645992	0.49261	0.016715		0.350592	-0.0917266	22.8593	0.043746	0.460554		6.1291e-06	0.000522907	0.460816	0.27703
						-0.336093	0.099752	22.9455	0.0435816	0.46514		4.5057e-06	0.000521708	0.465401	0.204121													0.0534491	0.053458	23.3017	0.0429153	0.492933		4.56856e-07	0.000645991	0.493256	0.016715		0.351049	-0.0914722	22.856	0.0437521	0.461077		6.12958e-06	0.000522946	0.461339	0.277031
						-0.33655	0.0995001	22.9431	0.0435861	0.465662		4.50158e-06	0.000521651	0.465922	0.203957													0.0529922	0.0530013	23.3015	0.0429158	0.493579		4.34493e-07	0.00064599	0.493902	0.0158968		0.351506	-0.0912177	22.8528	0.0437582	0.4616		6.11659e-06	0.000522978	0.461862	0.276427
						-0.337007	0.0992482	22.9407	0.0435906	0.466183		4.50026e-06	0.000521672	0.466444	0.203889													0.0525354	0.0525446	23.3012	0.0429162	0.494225		4.11221e-07	0.000645989	0.494548	0.0150454		0.351963	-0.0909631	22.8497	0.0437643	0.462123		6.44791e-06	0.000523071	0.462385	0.291348
						-0.337464	0.0989963	22.9384	0.0435951	0.466705		4.50068e-06	0.000521721	0.466966	0.203889													0.0520786	0.0520878	23.301	0.0429166	0.494871		4.1122e-07	0.000645987	0.495194	0.0150454		0.35242	-0.0907083	22.8463	0.0437708	0.462646		6.71277e-06	0.000523236	0.462908	0.30322
						-0.337921	0.0987444	22.936	0.0435996	0.467227		4.50102e-06	0.000521762	0.467488	0.203889													0.0516217	0.0516311	23.3008	0.042917	0.495517		4.11219e-07	0.000645986	0.49584	0.0150454		0.352877	-0.0904532	22.8428	0.0437775	0.463169		6.45592e-06	0.000523392	0.463431	0.291531
						-0.338377	0.0984923	22.9336	0.0436041	0.467748		4.50131e-06	0.000521796	0.468009	0.203888													0.0511649	0.0511744	23.3006	0.0429174	0.496163		4.11218e-07	0.000645985	0.496486	0.0150454		0.353333	-0.0901978	22.8394	0.043784	0.463693		6.45589e-06	0.000523471	0.463955	0.291486
						-0.338834	0.0982401	22.9313	0.0436086	0.46827		4.55623e-06	0.000521823	0.468531	0.206365													0.0507081	0.0507176	23.3003	0.0429178	0.496809		4.11217e-07	0.000645983	0.497132	0.0150454		0.35379	-0.0899422	22.836	0.0437904	0.464216		6.4567e-06	0.00052354	0.464478	0.291484
						-0.339291	0.0979879	22.9289	0.0436131	0.468792		4.90086e-06	0.000521843	0.469053	0.221966													0.0502513	0.0502609	23.3001	0.0429183	0.497455		4.13735e-07	0.000645982	0.497778	0.0151376		0.354247	-0.0896864	22.8327	0.0437969	0.46474		6.45741e-06	0.0005236	0.465002	0.291482
						-0.339748	0.0977357	22.9263	0.043618	0.469314		4.90099e-06	0.000521857	0.469575	0.221966													0.0497944	0.0498042	23.2999	0.0429187	0.498101		4.13762e-07	0.000645982	0.498424	0.0151385		0.354704	-0.0894306	22.8293	0.0438033	0.465263		6.458e-06	0.000523651	0.465525	0.291481
						-0.340205	0.0974834	22.9237	0.0436229	0.469836		4.90106e-06	0.000521864	0.470097	0.221966													0.0493376	0.0493474	23.2997	0.0429191	0.498747		4.13761e-07	0.000645981	0.49907	0.0151385		0.355161	-0.0891746	22.826	0.0438098	0.465787		6.78595e-06	0.000523694	0.466049	0.306258
						-0.340662	0.0972311	22.9211	0.0436278	0.470358		4.90107e-06	0.000521865	0.470619	0.221966													0.0488808	0.0488907	23.2994	0.0429195	0.499393		4.1376e-07	0.000645979	0.499716	0.0151385		0.355618	-0.0889186	22.8224	0.0438166	0.466311		7.09434e-06	0.000523728	0.466573	0.320155
						-0.341118	0.0969788	22.9186	0.0436327	0.470879		4.90102e-06	0.000521861	0.47114	0.221966													0.0484239	0.048434	23.2992	0.0429199	0.500039		4.13759e-07	0.000645978	0.500362	0.0151385		0.356074	-0.0886624	22.8187	0.0438237	0.466835		7.09469e-06	0.000523754	0.467096	0.320155
						-0.341575	0.0967266	22.916	0.0436376	0.471401		4.88673e-06	0.00052185	0.471662	0.221323													0.0479671	0.0479773	23.299	0.0429203	0.500685		3.91843e-07	0.000645976	0.501008	0.0143367		0.356531	-0.0884063	22.815	0.0438308	0.467358		7.08842e-06	0.000523772	0.46762	0.319861
						-0.342032	0.0964743	22.9134	0.0436425	0.471923		4.90443e-06	0.000521924	0.472184	0.222093													0.0475103	0.0475205	23.2988	0.0429207	0.501331		3.68925e-07	0.000645975	0.501654	0.0134982		0.356988	-0.0881501	22.8113	0.0438378	0.467882		7.08146e-06	0.000523855	0.468144	0.319496
						-0.342489	0.0962219	22.9109	0.0436474	0.472445		5.3341e-06	0.000522028	0.472706	0.241502													0.0470534	0.0470638	23.2986	0.0429211	0.501977		3.68924e-07	0.000645973	0.5023	0.0134982		0.357445	-0.0878937	22.8077	0.0438449	0.468406		7.08364e-06	0.000524016	0.468668	0.319496
						-0.342946	0.0959693	22.9081	0.0436528	0.472967		5.33514e-06	0.000522124	0.473228	0.241505													0.0465966	0.0466071	23.2984	0.0429215	0.502623		3.68923e-07	0.000645971	0.502946	0.0134982		0.357902	-0.087637	22.804	0.043852	0.46893		7.08566e-06	0.000524166	0.469192	0.319496
						-0.343403	0.0957164	22.9053	0.0436581	0.473489		5.32491e-06	0.000522212	0.47375	0.241001													0.0461398	0.0461504	23.2982	0.0429218	0.503269		3.68922e-07	0.000645969	0.503592	0.0134982		0.358359	-0.08738	22.8003	0.0438591	0.469454		7.43436e-06	0.000524305	0.469716	0.33513
						-0.343859	0.0954634	22.9025	0.0436634	0.474011		5.13395e-06	0.000522289	0.474273	0.232325													0.045683	0.0456937	23.298	0.0429222	0.503915		3.68921e-07	0.000645968	0.504238	0.0134982		0.358815	-0.0871227	22.7964	0.0438665	0.469978		7.82673e-06	0.000524435	0.470241	0.35273
						-0.344316	0.0952103	22.8998	0.0436686	0.474534		5.13408e-06	0.000522303	0.474795	0.232324													0.0452261	0.045237	23.2978	0.0429226	0.504561		3.71004e-07	0.000645966	0.504884	0.0135745		0.359272	-0.0868651	22.7924	0.0438744	0.470503		7.82858e-06	0.000524554	0.470765	0.352734
						-0.344773	0.0949571	22.8971	0.0436737	0.475056		5.13414e-06	0.000522309	0.475317	0.232324													0.0447693	0.0447803	23.2976	0.0429229	0.505207		3.7103e-07	0.000645966	0.50553	0.0135754		0.359729	-0.0866073	22.7883	0.0438822	0.471027		7.83028e-06	0.000524663	0.47129	0.352737
						-0.34523	0.0947039	22.8944	0.0436788	0.475578		5.13414e-06	0.000522309	0.47584	0.232324													0.0443125	0.0443236	23.2974	0.0429233	0.505853		3.71029e-07	0.000645964	0.506176	0.0135754		0.360186	-0.0863493	22.7842	0.04389	0.471552		7.83183e-06	0.000524763	0.471814	0.35274
						-0.345687	0.0944507	22.8917	0.043684	0.476101		5.58613e-06	0.000522301	0.476362	0.252781													0.0438556	0.0438669	23.2972	0.0429237	0.506499		3.71027e-07	0.000645962	0.506822	0.0135754		0.360643	-0.086091	22.7802	0.0438979	0.472077		7.83324e-06	0.000524854	0.472339	0.352742
						-0.346144	0.0941975	22.8888	0.0436895	0.476623		5.59923e-06	0.000522287	0.476884	0.25338													0.0433988	0.0434102	23.297	0.042924	0.507145		3.71026e-07	0.00064596	0.507468	0.0135754		0.3611	-0.0858326	22.7761	0.0439057	0.472602		7.83452e-06	0.000524936	0.472864	0.352744
						-0.3466	0.0939443	22.8858	0.0436951	0.477145		5.59278e-06	0.000522267	0.477406	0.253098													0.042942	0.0429535	23.2968	0.0429244	0.507791		3.49542e-07	0.000645958	0.508114	0.0127894		0.361556	-0.085574	22.772	0.0439135	0.473127		8.04659e-06	0.000525009	0.473389	0.362242
						-0.347057	0.0936912	22.8829	0.0437007	0.477668		5.59096e-06	0.000522338	0.477929	0.252982													0.0424852	0.0424968	23.2966	0.0429248	0.508437		3.26941e-07	0.000645955	0.50876	0.0119625		0.362013	-0.0853153	22.7679	0.0439216	0.473652		8.30815e-06	0.000525119	0.473914	0.373939
						-0.347514	0.0934379	22.88	0.0437063	0.47819		5.59204e-06	0.00052244	0.478451	0.252981													0.0420283	0.0420401	23.2964	0.0429251	0.509083		3.2694e-07	0.000645953	0.509406	0.0119625		0.36247	-0.0850564	22.7636	0.0439299	0.474177		8.31043e-06	0.000525268	0.474439	0.373935
						-0.347971	0.0931845	22.8771	0.0437119	0.478712		5.59303e-06	0.000522533	0.478974	0.25298													0.0415715	0.0415834	23.2962	0.0429254	0.509729		3.26939e-07	0.000645951	0.510052	0.0119625		0.362927	-0.0847971	22.7592	0.0439382	0.474702		8.31251e-06	0.000525406	0.474965	0.373931
						-0.348428	0.0929308	22.8741	0.0437175	0.479235		5.59392e-06	0.000522617	0.479496	0.25298													0.0411147	0.0411267	23.296	0.0429258	0.510375		3.26938e-07	0.000645948	0.510698	0.0119625		0.363384	-0.0845376	22.7549	0.0439465	0.475227		8.31442e-06	0.000525531	0.47549	0.373928
						-0.348885	0.0926769	22.8712	0.0437231	0.479757		6.0713e-06	0.000522693	0.480019	0.274529													0.0406578	0.0406701	23.2959	0.0429261	0.511021		3.26937e-07	0.000645946	0.511344	0.0119625		0.363841	-0.0842778	22.7506	0.0439548	0.475753		8.31614e-06	0.000525645	0.476016	0.373924
						-0.349341	0.0924229	22.868	0.0437292	0.48028		6.12734e-06	0.000522761	0.480542	0.277027													0.040201	0.0402134	23.2957	0.0429264	0.511667		3.28641e-07	0.000645943	0.511989	0.0120249		0.364297	-0.0840178	22.7463	0.0439631	0.476279		8.3177e-06	0.000525747	0.476541	0.373921
						-0.349798	0.0921688	22.8648	0.0437353	0.480803		6.12807e-06	0.000522821	0.481064	0.277028													0.0397442	0.0397567	23.2955	0.0429267	0.512312		3.28664e-07	0.000645943	0.512635	0.0120258		0.364754	-0.0837575	22.742	0.0439714	0.476804		8.7079e-06	0.000525839	0.477067	0.391395
						-0.350255	0.0919145	22.8616	0.0437414	0.481326		6.1287e-06	0.000522873	0.481587	0.277029													0.0392873	0.0393	23.2953	0.0429271	0.512958		3.28663e-07	0.00064594	0.513281	0.0120258		0.365211	-0.0834971	22.7375	0.0439802	0.47733		9.2293e-06	0.00052592	0.477593	0.414766
						-0.350712	0.0916602	22.8584	0.0437476	0.481849		6.12924e-06	0.000522918	0.48211	0.27703													0.0388305	0.0388434	23.2951	0.0429274	0.513604		3.28661e-07	0.000645937	0.513927	0.0120258		0.365668	-0.0832366	22.7328	0.0439894	0.477856		9.23056e-06	0.000525991	0.478119	0.414766
						-0.351169	0.0914057	22.8552	0.0437537	0.482372		6.12969e-06	0.000522955	0.482633	0.277031													0.0383737	0.0383867	23.295	0.0429277	0.51425		3.2866e-07	0.000645934	0.514573	0.0120258		0.366125	-0.0829758	22.728	0.0439986	0.478382		9.23165e-06	0.000526052	0.478645	0.414767
						-0.351626	0.0911512	22.852	0.0437598	0.482894		6.10886e-06	0.000522986	0.483156	0.276073													0.0379169	0.03793	23.2948	0.042928	0.514896		3.07593e-07	0.000645931	0.515219	0.011255		0.366582	-0.082715	22.7232	0.0440078	0.478908		9.22453e-06	0.000526105	0.479171	0.414406
						-0.352082	0.0908966	22.8488	0.0437659	0.483417		6.60769e-06	0.000523115	0.483679	0.298543													0.03746	0.0374734	23.2946	0.0429284	0.515542		2.85265e-07	0.000645928	0.515865	0.010438		0.367038	-0.0824541	22.7185	0.0440171	0.479434		9.21681e-06	0.000526231	0.479697	0.41396
						-0.352539	0.0906417	22.8454	0.0437725	0.483941		6.64644e-06	0.000523278	0.484202	0.3002													0.0370032	0.0370167	23.2945	0.0429286	0.516188		2.85263e-07	0.000645925	0.516511	0.010438		0.367495	-0.0821929	22.7137	0.0440263	0.47996		9.22062e-06	0.000526446	0.480224	0.413962
						-0.352996	0.0903865	22.8419	0.0437792	0.484464		6.45522e-06	0.000523414	0.484726	0.291487													0.0365464	0.0365601	23.2943	0.0429289	0.516834		2.85262e-07	0.000645921	0.517157	0.010438		0.367952	-0.0819312	22.7089	0.0440355	0.480487		9.68419e-06	0.000526649	0.48075	0.434606
						-0.353453	0.090131	22.8385	0.0437856	0.484987		6.45611e-06	0.00052349	0.485249	0.291485													0.0360895	0.0361035	23.2942	0.0429292	0.51748		2.8526e-07	0.000645918	0.517803	0.010438		0.368409	-0.0816692	22.704	0.0440452	0.481014		1.03035e-05	0.000526838	0.481277	0.462231
						-0.35391	0.0898754	22.8352	0.0437921	0.485511		6.4569e-06	0.000523557	0.485773	0.291483													0.0356327	0.0356468	23.294	0.0429295	0.518126		2.85259e-07	0.000645914	0.518449	0.010438		0.368866	-0.0814068	22.6986	0.0440555	0.48154		1.03071e-05	0.000527015	0.481804	0.46224
						-0.354366	0.0896196	22.8318	0.0437986	0.486034		6.45757e-06	0.000523615	0.486296	0.291482													0.0351759	0.0351902	23.2939	0.0429298	0.518772		2.86635e-07	0.00064591	0.519095	0.0104885		0.369323	-0.081144	22.6933	0.0440658	0.482067		1.03105e-05	0.00052718	0.482331	0.462247
						-0.354823	0.0893638	22.8284	0.043805	0.486558		6.45814e-06	0.000523663	0.48682	0.29148													0.034719	0.0347336	23.2937	0.0429301	0.519418		2.86657e-07	0.000645909	0.519741	0.0104893		0.369779	-0.0808809	22.688	0.0440761	0.482595		1.03136e-05	0.000527333	0.482858	0.462254
						-0.35528	0.0891078	22.8251	0.0438115	0.487082		6.95206e-06	0.000523704	0.487343	0.313749													0.0342622	0.0342769	23.2935	0.0429304	0.520064		2.86655e-07	0.000645905	0.520387	0.0104893		0.370236	-0.0806175	22.6827	0.0440864	0.483122		1.02383e-05	0.000527475	0.483386	0.458753
						-0.355737	0.0888517	22.8215	0.0438184	0.487605		7.09444e-06	0.000523736	0.487867	0.320155													0.0338054	0.0338203	23.2934	0.0429306	0.520709		2.86653e-07	0.000645901	0.521032	0.0104893		0.370693	-0.0803538	22.6775	0.0440967	0.483649		9.89069e-06	0.000527589	0.483913	0.443083
						-0.356194	0.0885956	22.8178	0.0438255	0.488129		7.09477e-06	0.00052376	0.488391	0.320155													0.0333486	0.0333637	23.2932	0.0429309	0.521355		2.86651e-07	0.000645896	0.521678	0.0104893		0.37115	-0.0800898	22.6724	0.0441066	0.484177		1.04059e-05	0.000527617	0.484441	0.466137
						-0.356651	0.0883394	22.8141	0.0438326	0.488653		7.08466e-06	0.000523776	0.488915	0.319688													0.0328917	0.0329071	23.2931	0.0429312	0.522001		2.6599e-07	0.000645892	0.522324	0.00973328		0.371607	-0.0798259	22.667	0.044117	0.484705		1.10524e-05	0.000527636	0.484968	0.495082
						-0.357107	0.0880832	22.8104	0.0438397	0.489177		7.08205e-06	0.000523898	0.489439	0.319496													0.0324349	0.0324505	23.2929	0.0429315	0.522647		2.43878e-07	0.000645887	0.52297	0.00892423		0.372063	-0.0795618	22.6613	0.044128	0.485232		1.10718e-05	0.000527733	0.485496	0.495859
						-0.357564	0.0878267	22.8067	0.0438468	0.4897		7.08418e-06	0.000524056	0.489963	0.319496													0.0319781	0.0319939	23.2928	0.0429317	0.523293		2.43876e-07	0.000645882	0.523616	0.00892423		0.37252	-0.0792976	22.6557	0.0441391	0.48576		1.10757e-05	0.000527925	0.486024	0.495855
						-0.358021	0.0875699	22.803	0.0438539	0.490225		7.08617e-06	0.000524204	0.490487	0.319496													0.0315212	0.0315373	23.2927	0.042932	0.523939		2.43874e-07	0.000645877	0.524262	0.00892423		0.372977	-0.079033	22.65	0.0441502	0.486288		1.10794e-05	0.000528102	0.486552	0.495851
						-0.358478	0.0873128	22.7993	0.043861	0.490749		7.62746e-06	0.00052434	0.491011	0.343811													0.0310644	0.0310808	23.2925	0.0429322	0.524585		2.43872e-07	0.000645871	0.524908	0.00892423		0.373434	-0.0787681	22.6443	0.0441612	0.486816		1.10827e-05	0.000528264	0.48708	0.495846
						-0.358935	0.0870554	22.7954	0.0438686	0.491273		7.82723e-06	0.000524467	0.491535	0.352731													0.0306076	0.0306242	23.2924	0.0429325	0.525231		2.4387e-07	0.000645865	0.525554	0.00892423		0.373891	-0.0785028	22.6386	0.0441723	0.487344		1.10857e-05	0.000528413	0.487608	0.495842
						-0.359392	0.0867978	22.7913	0.0438764	0.491798		7.82904e-06	0.000524583	0.49206	0.352735													0.0301508	0.0301676	23.2923	0.0429327	0.525877		2.44968e-07	0.00064586	0.526199	0.00896446		0.374348	-0.0782372	22.6329	0.0441834	0.487873		1.176e-05	0.000528548	0.488137	0.525866
						-0.359848	0.0865399	22.7872	0.0438842	0.492322		7.8307e-06	0.00052469	0.492584	0.352738													0.0296939	0.0297111	23.2921	0.0429329	0.526522		2.44987e-07	0.000645857	0.526845	0.00896522		0.374804	-0.0779714	22.6269	0.0441952	0.488401		1.24753e-05	0.000528671	0.488666	0.557725
						-0.360305	0.0862819	22.7832	0.0438921	0.492847		7.83222e-06	0.000524787	0.493109	0.35274													0.0292371	0.0292545	23.292	0.0429332	0.527168		2.44985e-07	0.00064585	0.527491	0.00896522		0.375261	-0.0777053	22.6205	0.0442076	0.48893		1.2478e-05	0.000528782	0.489194	0.557728
						-0.360762	0.0860236	22.7791	0.0438999	0.493372		7.83359e-06	0.000524876	0.493634	0.352743													0.0287803	0.028798	23.2919	0.0429334	0.527814		2.44982e-07	0.000645844	0.528137	0.00896522		0.375718	-0.077439	22.6141	0.0442201	0.489459		1.24804e-05	0.000528881	0.489723	0.557731
						-0.361219	0.0857651	22.775	0.0439077	0.493896		7.83483e-06	0.000524956	0.494159	0.352745													0.0283234	0.0283414	23.2917	0.0429337	0.52846		2.4498e-07	0.000645837	0.528783	0.00896522		0.376175	-0.0771725	22.6078	0.0442326	0.489988		1.24825e-05	0.000528968	0.490252	0.557733
						-0.361676	0.0855065	22.771	0.0439156	0.494421		8.1699e-06	0.000525027	0.494684	0.367781													0.0278666	0.0278849	23.2916	0.0429339	0.529106		2.24721e-07	0.000645829	0.529429	0.00822394		0.376632	-0.0769058	22.6014	0.0442451	0.490517		1.24859e-05	0.000529045	0.490781	0.557805
						-0.362133	0.0852477	22.7667	0.0439237	0.494946		8.30876e-06	0.000525159	0.495209	0.373938													0.0274098	0.0274284	23.2915	0.0429342	0.529752		2.02755e-07	0.000645821	0.530075	0.00742014		0.377089	-0.076639	22.595	0.0442576	0.491046		1.24917e-05	0.000529203	0.49131	0.557896
						-0.362589	0.0849887	22.7624	0.043932	0.495472		8.31099e-06	0.000525306	0.495734	0.373934													0.0269529	0.0269719	23.2914	0.0429344	0.530397		2.02752e-07	0.000645813	0.53072	0.00742014		0.377545	-0.0763719	22.5886	0.0442701	0.491575		1.34062e-05	0.00052946	0.49184	0.598449
						-0.363046	0.0847294	22.7581	0.0439404	0.495997		8.31303e-06	0.00052544	0.49626	0.37393													0.0264961	0.0265154	23.2913	0.0429346	0.531043		2.02749e-07	0.000645805	0.531366	0.00742014		0.378002	-0.0761042	22.5818	0.0442835	0.492104		1.419e-05	0.000529701	0.492369	0.633149
						-0.363503	0.0844698	22.7538	0.0439487	0.496522		8.31489e-06	0.000525562	0.496785	0.373927													0.0260393	0.0260589	23.2912	0.0429348	0.531689		2.02746e-07	0.000645796	0.532012	0.00742014		0.378459	-0.0758361	22.5746	0.0442977	0.492634		1.41964e-05	0.000529926	0.492899	0.633167
						-0.36396	0.0842099	22.7495	0.043957	0.497048		8.31657e-06	0.000525673	0.497311	0.373924													0.0255825	0.0256025	23.291	0.042935	0.532335		2.02743e-07	0.000645786	0.532658	0.00742014		0.378916	-0.0755675	22.5673	0.0443119	0.493164		1.40234e-05	0.000530136	0.493429	0.625201
						-0.364417	0.0839498	22.7452	0.0439653	0.497574		8.31808e-06	0.000525772	0.497836	0.373921													0.0251256	0.025146	23.2909	0.0429352	0.532981		2.03608e-07	0.000645776	0.533304	0.00745189		0.379373	-0.0752986	22.5602	0.0443259	0.493694		1.35915e-05	0.000530301	0.493959	0.605759
						-0.364874	0.0836896	22.7409	0.0439736	0.498099		8.94568e-06	0.000525861	0.498362	0.402065													0.0246688	0.0246896	23.2908	0.0429354	0.533626		2.03626e-07	0.00064577	0.533949	0.00745262		0.37983	-0.0750293	22.5533	0.0443395	0.494224		1.35933e-05	0.000530376	0.49449	0.605754
						-0.36533	0.0834291	22.7363	0.0439826	0.498625		9.22965e-06	0.000525939	0.498888	0.414766													0.024212	0.0242332	23.2907	0.0429356	0.534272		2.03622e-07	0.000645759	0.534595	0.00745262		0.380286	-0.0747598	22.5464	0.0443531	0.494755		1.35948e-05	0.000530439	0.49502	0.60575
						-0.365787	0.0831685	22.7315	0.0439918	0.499151		9.23086e-06	0.000526008	0.499414	0.414766													0.0237551	0.0237768	23.2906	0.0429358	0.534918		2.03619e-07	0.000645747	0.535241	0.00745262		0.380743	-0.0744902	22.5394	0.0443667	0.495285		1.47332e-05	0.00053049	0.49555	0.65641
						-0.366244	0.0829077	22.7267	0.044001	0.499677		9.23191e-06	0.000526067	0.49994	0.414767													0.0232983	0.0233204	23.2905	0.042936	0.535564		2.03615e-07	0.000645735	0.535887	0.00745262		0.3812	-0.0742205	22.532	0.0443814	0.495816		1.5446e-05	0.000530529	0.496081	0.688115
						-0.366701	0.0826469	22.722	0.0440103	0.500203		9.22005e-06	0.000526117	0.500466	0.414195													0.0228415	0.022864	23.2904	0.0429362	0.536209		1.83776e-07	0.000645721	0.536532	0.00672662		0.381657	-0.0739508	22.5241	0.0443968	0.496346		1.55013e-05	0.000530559	0.496611	0.690538
						-0.367158	0.0823859	22.7172	0.0440195	0.500729		9.21783e-06	0.000526288	0.500993	0.41396													0.0223847	0.0224076	23.2903	0.0429364	0.536855		1.61858e-07	0.000645707	0.537178	0.0059245		0.382114	-0.073681	22.5163	0.0444123	0.496877		1.55718e-05	0.000530672	0.497142	0.693534
						-0.367615	0.0821246	22.7125	0.0440287	0.501256		9.22158e-06	0.000526501	0.501519	0.413962													0.0219278	0.0219513	23.2902	0.0429365	0.537501		1.61854e-07	0.000645693	0.537824	0.0059245		0.382571	-0.0734109	22.5084	0.0444279	0.497407		1.55781e-05	0.000530888	0.497673	0.69353
						-0.368071	0.0818628	22.7077	0.0440379	0.501782		9.96609e-06	0.0005267	0.502046	0.447214													0.021471	0.021495	23.2901	0.0429367	0.538147		1.6185e-07	0.000645677	0.538469	0.0059245		0.383027	-0.0731405	22.5005	0.0444435	0.497938		1.55839e-05	0.000531088	0.498204	0.693526
						-0.368528	0.0816007	22.7026	0.0440479	0.502309		1.03044e-05	0.000526886	0.502572	0.462234													0.0210142	0.0210387	23.29	0.0429369	0.538792		1.61846e-07	0.00064566	0.539115	0.0059245		0.383484	-0.0728696	22.4926	0.0444591	0.498469		1.55892e-05	0.000531272	0.498735	0.693523
						-0.368985	0.0813382	22.6973	0.0440582	0.502836		1.0308e-05	0.00052706	0.503099	0.462242													0.0205573	0.0205824	23.2899	0.042937	0.539438		1.61841e-07	0.000645642	0.539761	0.0059245		0.383941	-0.0725984	22.4847	0.0444747	0.499001		1.72287e-05	0.000531442	0.499266	0.766215
						-0.369442	0.0810753	22.6919	0.0440685	0.503363		1.03113e-05	0.000527221	0.503626	0.462249													0.0201005	0.0201262	23.2898	0.0429372	0.540084		1.62517e-07	0.000645623	0.540406	0.00594939		0.384398	-0.0723269	22.476	0.0444919	0.499532		1.79194e-05	0.000531597	0.499798	0.796701
						-0.369899	0.0808121	22.6866	0.0440788	0.50389		1.03144e-05	0.000527371	0.504154	0.462256													0.0196437	0.0196699	23.2898	0.0429373	0.540729		1.62532e-07	0.000645608	0.541052	0.00595011		0.384855	-0.072055	22.467	0.0445098	0.500064		1.79244e-05	0.00053174	0.50033	0.796709
						-0.370356	0.0805486	22.6813	0.0440891	0.504417		1.01272e-05	0.00052751	0.504681	0.453746													0.0191868	0.0192137	23.2897	0.0429375	0.541375		1.62527e-07	0.000645586	0.541698	0.00595011		0.385312	-0.0717829	22.4579	0.0445277	0.500595		1.7929e-05	0.000531869	0.500861	0.796717
						-0.370812	0.0802849	22.6761	0.0440992	0.504945		9.89084e-06	0.000527597	0.505209	0.443082													0.01873	0.0187576	23.2896	0.0429377	0.54202		1.62521e-07	0.000645563	0.542343	0.00595011		0.385768	-0.0715105	22.4489	0.0445457	0.501127		1.79331e-05	0.000531987	0.501393	0.796723
						-0.371269	0.0800209	22.671	0.0441091	0.505473		1.07056e-05	0.000527623	0.505736	0.479556													0.0182732	0.0183014	23.2895	0.0429378	0.542666		1.62515e-07	0.000645538	0.542989	0.00595011		0.386225	-0.0712379	22.4398	0.0445636	0.501659		1.79368e-05	0.000532093	0.501925	0.796729
						-0.371726	0.0797569	22.6655	0.0441198	0.506		1.10607e-05	0.00052764	0.506264	0.49545													0.0178164	0.0178453	23.2894	0.042938	0.543311		1.4316e-07	0.000645511	0.543634	0.00524168		0.386682	-0.0709651	22.4308	0.0445815	0.502191		1.80028e-05	0.000532188	0.502457	0.799519
						-0.372183	0.0794929	22.6599	0.0441309	0.506528		1.10729e-05	0.000527785	0.506792	0.495858													0.0173595	0.0173893	23.2893	0.0429381	0.543957		1.21144e-07	0.000645482	0.54428	0.00443579		0.387139	-0.0706921	22.4218	0.0445995	0.502724		2.04945e-05	0.000532367	0.50299	0.90987
						-0.37264	0.0792286	22.6542	0.044142	0.507056		1.10767e-05	0.000527972	0.50732	0.495854													0.0169027	0.0169333	23.2893	0.0429383	0.544602		1.21138e-07	0.00064545	0.544925	0.00443579		0.387596	-0.0704187	22.4115	0.04462	0.503256		2.03444e-05	0.000532647	0.503522	0.902732
						-0.373097	0.0789639	22.6485	0.0441531	0.507584		1.10803e-05	0.000528146	0.507848	0.495849													0.0164459	0.0164773	23.2892	0.0429384	0.545248		1.21131e-07	0.000645416	0.545571	0.00443579		0.388053	-0.0701448	22.4012	0.0446404	0.503789		2.01195e-05	0.000532818	0.504055	0.892468
						-0.373553	0.0786989	22.6428	0.0441641	0.508112		1.10835e-05	0.000528305	0.508376	0.495845													0.015989	0.0160214	23.2891	0.0429385	0.545893		1.21124e-07	0.000645379	0.546216	0.00443579		0.388509	-0.0698706	22.3912	0.0446605	0.504321		2.01242e-05	0.000532949	0.504588	0.892458
						-0.37401	0.0784335	22.6371	0.0441752	0.50864		1.10865e-05	0.00052845	0.508904	0.495841													0.0155322	0.0155655	23.2891	0.0429386	0.546539		1.21117e-07	0.000645339	0.546861	0.00443579		0.388966	-0.0695961	22.3811	0.0446806	0.504854		2.01286e-05	0.000533071	0.505121	0.892448
						-0.374467	0.0781679	22.6314	0.0441863	0.509168		1.21222e-05	0.000528582	0.509433	0.54203													0.0150754	0.0151097	23.289	0.0429387	0.547184		1.21643e-07	0.000645294	0.547507	0.00445536		0.389423	-0.0693214	22.371	0.0447007	0.505387		2.01327e-05	0.000533185	0.505654	0.892439
						-0.374924	0.077902	22.6252	0.0441984	0.509697		1.24761e-05	0.000528701	0.509961	0.557726													0.0146185	0.0146539	23.2889	0.0429389	0.547829		1.21656e-07	0.000645254	0.548152	0.00445612		0.38988	-0.0690465	22.3609	0.0447209	0.505921		2.01365e-05	0.00053329	0.506187	0.892431
						-0.375381	0.0776358	22.6189	0.0442109	0.510226		1.24787e-05	0.000528809	0.51049	0.557729													0.0141617	0.0141982	23.2889	0.042939	0.548475		1.21646e-07	0.000645202	0.548797	0.00445612		0.390337	-0.0687713	22.3509	0.044741	0.506454		2.33784e-05	0.000533388	0.506721	1.03592
						-0.375837	0.0773695	22.6125	0.0442234	0.510755		1.2481e-05	0.000528905	0.511019	0.557731													0.0137049	0.0137426	23.2888	0.0429391	0.54912		1.21635e-07	0.000645144	0.549442	0.00445612		0.390793	-0.068496	22.3392	0.0447644	0.506987		2.3583e-05	0.000533479	0.507254	1.0448
						-0.376294	0.0771029	22.6061	0.0442359	0.511283		1.2483e-05	0.00052899	0.511548	0.557733													0.0132481	0.0132871	23.2887	0.0429392	0.549765		1.21623e-07	0.000645081	0.550087	0.00445612		0.39125	-0.0682205	22.3274	0.044788	0.507521		2.35867e-05	0.000533563	0.507788	1.04481
						-0.376751	0.0768362	22.5997	0.0442483	0.511812		1.24873e-05	0.000529064	0.512077	0.557846													0.0127912	0.0128316	23.2887	0.0429393	0.55041		1.0294e-07	0.000645011	0.550732	0.00377199		0.391707	-0.0679448	22.3157	0.0448116	0.508054		2.38034e-05	0.000533641	0.508321	1.05425
						-0.377208	0.0765693	22.5933	0.0442608	0.512341		1.24934e-05	0.000529272	0.512606	0.557897													0.0123344	0.0123763	23.2886	0.0429394	0.551055		8.05595e-08	0.000644933	0.551377	0.00295227		0.392164	-0.067669	22.3038	0.0448354	0.508588		2.40749e-05	0.000533813	0.508855	1.06593
						-0.377665	0.0763021	22.587	0.0442733	0.512871		1.38482e-05	0.000529525	0.513136	0.618101													0.0118776	0.011921	23.2886	0.0429395	0.5517		8.05486e-08	0.000644845	0.552022	0.00295227		0.392621	-0.0673928	22.2919	0.0448594	0.509122		2.40881e-05	0.000534106	0.509389	1.06593
						-0.378122	0.0760343	22.5799	0.0442872	0.5134		1.41917e-05	0.000529761	0.513665	0.633154													0.0114207	0.0114659	23.2885	0.0429396	0.552345		8.05364e-08	0.000644748	0.552667	0.00295227		0.393078	-0.0671161	22.2799	0.0448835	0.509656		2.44935e-05	0.000534394	0.509923	1.08329
						-0.378578	0.075766	22.5727	0.0443014	0.51393		1.41981e-05	0.000529982	0.514195	0.633171													0.0109639	0.0110109	23.2885	0.0429397	0.55299		8.05227e-08	0.000644638	0.553312	0.00295227		0.393534	-0.0668388	22.2677	0.044908	0.51019		2.87272e-05	0.000534676	0.510458	1.26986
						-0.379035	0.0754974	22.5654	0.0443156	0.51446		1.38642e-05	0.000530189	0.514725	0.618044													0.0105071	0.0105561	23.2884	0.0429398	0.553634		8.05072e-08	0.000644514	0.553956	0.00295227		0.393991	-0.066561	22.2535	0.0449368	0.510725		2.87429e-05	0.000534953	0.510992	1.2699
						-0.379492	0.0752283	22.5584	0.0443294	0.51499		1.3592e-05	0.000530322	0.515255	0.605758													0.0100503	0.0101014	23.2884	0.0429399	0.554279		8.09166e-08	0.000644373	0.554601	0.00296793		0.394448	-0.0662826	22.2393	0.0449655	0.51126		2.87583e-05	0.000535225	0.511528	1.26993
						-0.379949	0.0749589	22.5515	0.044343	0.515521		1.35938e-05	0.000530394	0.515786	0.605753													0.00959342	0.009647	23.2883	0.0429399	0.554923		8.09233e-08	0.000644224	0.555245	0.00296886		0.394905	-0.0660037	22.2251	0.0449943	0.511795		2.87734e-05	0.000535493	0.512063	1.26997
						-0.380406	0.0746894	22.5446	0.0443566	0.516051		1.35952e-05	0.000530453	0.516316	0.605748													0.00913659	0.00919276	23.2883	0.04294	0.555567		8.09002e-08	0.000644041	0.555889	0.00296886		0.395362	-0.0657244	22.2109	0.045023	0.512331		2.87883e-05	0.000535755	0.512598	1.27
						-0.380863	0.0744198	22.5376	0.0443702	0.516581		1.52165e-05	0.000530501	0.516847	0.677924													0.00867976	0.00873878	23.2883	0.0429401	0.556211		8.08735e-08	0.000643829	0.556533	0.00296886		0.395819	-0.0654445	22.1967	0.0450518	0.512866		2.8024e-05	0.000536012	0.513134	1.23569
						-0.381319	0.0741501	22.5299	0.0443854	0.517112		1.54463e-05	0.000530538	0.517377	0.688115													0.00822293	0.00828511	23.2882	0.0429402	0.556855		8.08423e-08	0.000643582	0.557177	0.00296885		0.396275	-0.0651641	22.1829	0.0450798	0.513402		2.89923e-05	0.00053617	0.51367	1.27801
						-0.381776	0.0738804	22.5221	0.0444009	0.517642		1.55332e-05	0.000530565	0.517908	0.691954													0.0077661	0.00783178	23.2882	0.0429403	0.557499		6.34648e-08	0.000643292	0.55782	0.00233173		0.396732	-0.0648834	22.1686	0.0451088	0.513939		3.3857e-05	0.000536264	0.514207	1.49219
						-0.382233	0.0736105	22.5142	0.0444164	0.518173		1.55735e-05	0.00053073	0.518438	0.693533													0.00730927	0.00737887	23.2881	0.0429403	0.558142		4.00449e-08	0.000642949	0.558463	0.00147206		0.397189	-0.0646025	22.152	0.0451427	0.514475		3.49616e-05	0.000544567	0.514747	1.51738
						-0.38269	0.0733404	22.5063	0.044432	0.518704		1.55796e-05	0.000530942	0.518969	0.693529													0.00685244	0.00692644	23.2881	0.0429404	0.558785		4.00191e-08	0.000642537	0.559106	0.00147205		0.397646	-0.0643061	22.1348	0.0451776	0.515019		3.62697e-05	0.000567319	0.515303	1.51102
						-0.383147	0.0730698	22.4984	0.0444476	0.519235		1.55853e-05	0.000531137	0.5195	0.693525													0.00639561	0.0064746	23.2881	0.0429404	0.559428		3.9988e-08	0.00064204	0.559749	0.00147205		0.398103	-0.0639697	22.1171	0.0452139	0.515587		3.7892e-05	0.000598051	0.515886	1.49749
						-0.383604	0.0727989	22.4905	0.0444631	0.519766		1.55905e-05	0.000531318	0.520031	0.693522													0.00593878	0.00602346	23.2881	0.0429404	0.56007		3.99497e-08	0.00064143	0.56039	0.00147204		0.39856	-0.0635838	22.0986	0.0452518	0.516185		3.99547e-05	0.000640547	0.516505	1.47425
						-0.38406	0.0725276	22.4827	0.0444787	0.520297		1.7836e-05	0.000531484	0.520563	0.793162													0.00548196	0.0055732	23.288	0.0429405	0.560711		3.99021e-08	0.000640672	0.561031	0.00147202		0.399016	-0.0631348	22.0791	0.0452918	0.516825		3.72122e-05	0.000602271	0.517126	1.46032
						-0.384517	0.0722559	22.4736	0.0444966	0.520829		1.79208e-05	0.000531636	0.521094	0.796703													0.00502513	0.00512401	23.288	0.0429405	0.561352		4.01884e-08	0.000639715	0.561672	0.0014848		0.399409	-0.0626779	22.0609	0.045329	0.517428		4.2675e-05	0.000565384	0.51771	1.78395
						-0.384974	0.071984	22.4646	0.0445145	0.52136		1.79256e-05	0.000531775	0.521626	0.796711													0.0045683	0.00467619	23.288	0.0429406	0.561991		4.01541e-08	0.000638507	0.562311	0.00148634		0.399742	-0.0622211	22.0402	0.0453717	0.517993		3.94252e-05	0.000538265	0.518262	1.73113
						-0.385431	0.0717118	22.4556	0.0445324	0.521892		1.79301e-05	0.000531901	0.522158	0.796718													0.00411147	0.0042301	23.288	0.0429406	0.56263		4.00512e-08	0.000636893	0.562948	0.00148629		0.400027	-0.0617643	22.0211	0.0454111	0.518531		3.67399e-05	0.00051821	0.51879	1.67566
						-0.385888	0.0714394	22.4465	0.0445503	0.522424		1.79341e-05	0.000532016	0.52269	0.796725													0.00365464	0.00378632	23.288	0.0429406	0.563267		3.99118e-08	0.000634713	0.563584	0.0014862		0.400271	-0.0613074	22.0033	0.0454478	0.519049		3.44986e-05	0.000503299	0.519301	1.62006
						-0.386345	0.0711667	22.4375	0.0445683	0.522956		1.79377e-05	0.000532119	0.523222	0.796731													0.00319781	0.00334568	23.2879	0.0429407	0.563901		3.97169e-08	0.000631679	0.564217	0.00148605		0.400483	-0.0608506	21.9866	0.0454823	0.519553		3.26122e-05	0.000492159	0.519799	1.56613
						-0.386801	0.0708938	22.4285	0.0445862	0.523488		1.82613e-05	0.000532211	0.523754	0.810963													0.00274098	0.00290942	23.2879	0.0429407	0.564533		2.77532e-08	0.000627295	0.564847	0.00104567		0.400666	-0.0603938	21.9708	0.0455149	0.520045		2.8209e-05	0.000483797	0.520287	1.37809
						-0.387258	0.0706208	22.4193	0.0446045	0.52402		2.1034e-05	0.000532442	0.524286	0.933694													0.00228415	0.00247953	23.2879	0.0429407	0.56516		-1.78793e-10	0.000620674	0.565471	-6.80835e-06		0.400825	-0.0599369	21.9572	0.0455431	0.520529		2.61613e-05	0.000477602	0.520767	1.29464
						-0.387715	0.0703473	22.4087	0.0446255	0.524553		2.01158e-05	0.000532715	0.524819	0.892476													0.00182732	0.00205936	23.2879	0.0429407	0.565781		-1.75583e-10	0.000610124	0.566086	-6.80172e-06		0.400964	-0.0594801	21.9446	0.0455693	0.521006		3.17594e-05	0.000472887	0.521243	1.58734
						-0.388172	0.0700733	22.3986	0.0446456	0.525085		2.01208e-05	0.000532853	0.525352	0.892465													0.00137049	0.00165493	23.2879	0.0429407	0.566391		-1.69978e-10	0.000592258	0.566687	-6.78322e-06		0.401086	-0.0590233	21.9293	0.0456011	0.521479		3.47496e-05	0.000469266	0.521714	1.75019
						-0.388629	0.069799	22.3885	0.0446658	0.525618		2.01254e-05	0.000532982	0.525885	0.892455													0.000913659	0.001278	23.2879	0.0429407	0.566984		-1.59277e-10	0.000560316	0.567264	-6.71852e-06		0.401194	-0.0585665	21.9126	0.0456358	0.521948		3.36362e-05	0.000466478	0.522182	1.70423
						-0.389086	0.0695244	22.3784	0.0446859	0.526151		2.01297e-05	0.000533102	0.526418	0.892446													0.00045683	0.000953566	23.2879	0.0429407	0.567544		-1.37059e-10	0.00050509	0.567796	-6.41347e-06		0.401288	-0.0581096	21.8965	0.0456694	0.522415		3.26655e-05	0.000464329	0.522647	1.66271
						-0.389542	0.0692496	22.3684	0.044706	0.526684		2.01337e-05	0.000533213	0.526951	0.892437													-1.14258e-14	0.000738106	23.2879	0.0429407	0.568049		2.04894e-08	0.000456851	0.568277	0.00106001		0.401371	-0.0576528	21.8808	0.0457021	0.522879		3.18175e-05	0.000462667	0.523111	1.62536
						-0.389999	0.0689746	22.3583	0.0447261	0.527218		2.08352e-05	0.000533317	0.527484	0.923349													-0.00045683	0.00074251	23.2879	0.0429408	0.568506		2.05464e-08	0.000537793	0.568775	0.000902971		0.401445	-0.057196	21.8656	0.0457339	0.523342		3.10752e-05	0.000461381	0.523573	1.59187
						-0.390456	0.0686994	22.3479	0.044747	0.527751		2.358e-05	0.000533413	0.528018	1.0448													-0.000913659	0.00102628	23.2879	0.0429408	0.569044		2.05716e-08	0.000612232	0.56935	0.000794156		0.401509	-0.0567391	21.8508	0.045765	0.523803		3.04244e-05	0.000460383	0.524033	1.56191
						-0.390913	0.0684241	22.3361	0.0447706	0.528284		2.3584e-05	0.000533502	0.528551	1.0448													-0.00137049	0.00143388	23.2879	0.0429408	0.569656		2.05776e-08	0.000632193	0.569972	0.000769305		0.401566	-0.0562823	21.8362	0.0457954	0.524264		2.98529e-05	0.000459607	0.524493	1.53516
						-0.39137	0.0681485	22.3243	0.0447941	0.528818		2.35877e-05	0.000533584	0.529085	1.04481													-0.00182732	0.00187089	23.2879	0.0429408	0.570288		2.05795e-08	0.000638715	0.570607	0.000761521		0.401617	-0.0558255	21.822	0.0458253	0.524723		2.93504e-05	0.000459003	0.524953	1.51131
						-0.391827	0.0678728	22.3126	0.0448177	0.529351		2.39289e-05	0.00053366	0.529618	1.05977													-0.00228415	0.00231728	23.2878	0.0429408	0.570927		2.05803e-08	0.000641539	0.571247	0.000758199		0.401661	-0.0553686	21.808	0.0458546	0.525182		2.46661e-05	0.000458532	0.525412	1.27141
						-0.392283	0.0675969	22.3007	0.0448417	0.529885		2.40784e-05	0.00053389	0.530152	1.06593													-0.00274098	0.0027677	23.2878	0.0429409	0.571568		2.05808e-08	0.000643002	0.57189	0.00075649		0.401701	-0.0549118	21.7963	0.0458793	0.525641		3.48707e-05	0.000458201	0.52587	1.7987
						-0.39274	0.0673206	22.2887	0.0448657	0.530419		2.40915e-05	0.000534182	0.530686	1.06593													-0.00319781	0.0032202	23.2878	0.0429409	0.572211		2.0581e-08	0.000643854	0.572533	0.000755497		0.401736	-0.054455	21.7798	0.0459142	0.526099		3.44634e-05	0.000457938	0.526328	1.77871
						-0.393197	0.0670438	22.2768	0.0448898	0.530953		2.57016e-05	0.000534468	0.53122	1.13656													-0.00365464	0.00367391	23.2878	0.0429409	0.572855		2.05812e-08	0.000644394	0.573177	0.000754871		0.401768	-0.0539982	21.7634	0.0459486	0.526557		3.40903e-05	0.000457721	0.526786	1.76029
						-0.393654	0.0667663	22.264	0.0449155	0.531488		2.87313e-05	0.000534749	0.531755	1.26987													-0.00411147	0.00412839	23.2878	0.0429409	0.573499		2.05813e-08	0.000644756	0.573822	0.00075445		0.401797	-0.0535413	21.7473	0.0459827	0.527015		3.37494e-05	0.000457544	0.527243	1.74336
						-0.394111	0.0664884	22.2498	0.0449443	0.532022		2.8747e-05	0.000535025	0.53229	1.26991													-0.0045683	0.00458338	23.2878	0.042941	0.574144		2.11945e-08	0.000645012	0.574467	0.000776623		0.401822	-0.0530845	21.7314	0.0460165	0.527472		3.34386e-05	0.000457399	0.527701	1.72785
						-0.394568	0.0662099	22.2356	0.044973	0.532557		2.87623e-05	0.000535296	0.532825	1.26994													-0.00502513	0.00503873	23.2878	0.042941	0.574789		6.1639e-08	0.000645202	0.575112	0.00225795		0.401845	-0.0526277	21.7156	0.0460499	0.52793		3.3156e-05	0.000457282	0.528158	1.71369
						-0.395024	0.0659309	22.2213	0.0450018	0.533093		2.87773e-05	0.000535562	0.53336	1.26997													-0.00548196	0.00549436	23.2877	0.042941	0.575434		6.1648e-08	0.000645342	0.575757	0.00225779		0.401865	-0.0521708	21.6999	0.0460831	0.528387		3.28998e-05	0.000457187	0.528615	1.7008
						-0.395481	0.0656513	22.2071	0.0450305	0.533628		2.87921e-05	0.000535823	0.533896	1.27001													-0.00593878	0.00595018	23.2877	0.0429411	0.57608		6.16549e-08	0.00064545	0.576403	0.00225766		0.401883	-0.051714	21.6845	0.046116	0.528844		3.2668e-05	0.000457111	0.529073	1.6891
						-0.395938	0.0653713	22.193	0.0450593	0.534164		2.76767e-05	0.000536079	0.534432	1.22022													-0.00639561	0.00640615	23.2877	0.0429412	0.576725		6.16604e-08	0.000645535	0.577048	0.00225757		0.401899	-0.0512572	21.6691	0.0461486	0.529301		3.24589e-05	0.00045705	0.52953	1.67851
						-0.396395	0.0650908	22.1793	0.045087	0.5347		3.05357e-05	0.000536194	0.534968	1.34598													-0.00685244	0.00686225	23.2876	0.0429412	0.577371		6.16648e-08	0.000645603	0.577694	0.00225749		0.401914	-0.0508004	21.6539	0.0461811	0.529758		3.22706e-05	0.000457001	0.529987	1.66895
						-0.396852	0.0648101	22.1643	0.0451175	0.535236		3.41401e-05	0.000536289	0.535504	1.5046													-0.00730927	0.00731844	23.2876	0.0429413	0.578016		6.16683e-08	0.000645659	0.578339	0.00225742		0.401926	-0.0503435	21.6388	0.0462134	0.530215		2.92666e-05	0.000456963	0.530444	1.51372
						-0.397308	0.0645292	22.1476	0.0451517	0.535773		3.52784e-05	0.000549897	0.536048	1.51629													-0.0077661	0.00777471	23.2876	0.0429413	0.578662		6.16713e-08	0.000645705	0.578985	0.00225737		0.401937	-0.0498867	21.6251	0.0462426	0.530672		3.0575e-05	0.000456924	0.530901	1.58153
						-0.397765	0.0642231	22.1303	0.045187	0.536322		3.66592e-05	0.000574458	0.53661	1.50827													-0.00822293	0.00823104	23.2875	0.0429414	0.579308		6.16737e-08	0.000645743	0.579631	0.00225733		0.401946	-0.0494299	21.6108	0.0462732	0.531129		3.03696e-05	0.000456896	0.531358	1.571
						-0.398222	0.0638748	22.1123	0.0452236	0.536897		3.8382e-05	0.000607823	0.537201	1.49247													-0.00867976	0.00868743	23.2875	0.0429415	0.579953		6.16758e-08	0.000645776	0.580276	0.00225729		0.401954	-0.048973	21.5966	0.0463036	0.531586		3.02056e-05	0.000456877	0.531814	1.56258
						-0.398679	0.0634738	22.0936	0.045262	0.537505		3.95869e-05	0.000638129	0.537824	1.46621													-0.00913659	0.00914386	23.2875	0.0429415	0.580599		6.16776e-08	0.000645803	0.580922	0.00225726		0.401961	-0.0485162	21.5825	0.0463338	0.532043		3.00732e-05	0.000456864	0.532271	1.55577
						-0.399125	0.063017	22.0743	0.0453016	0.538143		3.87592e-05	0.000591588	0.538439	1.54849													-0.00959342	0.00960034	23.2874	0.0429416	0.581245		6.19756e-08	0.000645827	0.581568	0.00226808		0.401966	-0.0480594	21.5685	0.0463639	0.5325		2.9965e-05	0.000456855	0.532728	1.55021
						-0.3995	0.0625602	22.0554	0.0453404	0.538734		4.17706e-05	0.000557548	0.539013	1.77069													-0.0100503	0.0100568	23.2874	0.0429417	0.581891		1.02625e-07	0.000645849	0.582214	0.00375557		0.401971	-0.0476025	21.5546	0.0463938	0.532957		2.98758e-05	0.000456848	0.533185	1.54562
						-0.39982	0.0621033	22.0351	0.0453821	0.539292		3.86809e-05	0.000532481	0.539558	1.71691													-0.0105071	0.0105134	23.2874	0.0429418	0.582537		1.02627e-07	0.000645866	0.58286	0.00375555		0.401975	-0.0471457	21.5407	0.0464237	0.533413		2.98017e-05	0.000456844	0.533642	1.5418
						-0.400094	0.0616465	22.0163	0.0454208	0.539825		3.61208e-05	0.000513917	0.540081	1.66119													-0.0109639	0.0109699	23.2873	0.0429419	0.583183		1.02629e-07	0.000645882	0.583506	0.00375554		0.401979	-0.0466889	21.5269	0.0464535	0.53387		2.97395e-05	0.00045684	0.534099	1.53859
						-0.400329	0.0611897	21.9988	0.0454569	0.540338		3.3979e-05	0.000500097	0.540588	1.60587													-0.0114207	0.0114265	23.2872	0.042942	0.583828		1.02631e-07	0.000645895	0.584151	0.00375552		0.401982	-0.0462321	21.5131	0.0464832	0.534327		2.96871e-05	0.000456838	0.534556	1.53589
						-0.400532	0.0607328	21.9824	0.0454909	0.540839		3.19767e-05	0.000489759	0.541083	1.54314													-0.0118776	0.0118831	23.2872	0.0429421	0.584474		1.02632e-07	0.000645907	0.584797	0.00375551		0.401985	-0.0457752	21.4994	0.0465129	0.534784		2.96426e-05	0.000456836	0.535012	1.53359
						-0.400709	0.060276	21.967	0.0455229	0.541328		2.71273e-05	0.000482	0.541569	1.33019													-0.0123344	0.0123398	23.2871	0.0429422	0.58512		1.02634e-07	0.000645918	0.585443	0.00375549		0.401987	-0.0453184	21.4857	0.0465426	0.535241		6.20384e-05	0.000456835	0.535469	3.20963
						-0.400863	0.0598192	21.9539	0.04555	0.54181		2.58477e-05	0.000476259	0.542048	1.28272													-0.0127912	0.0127964	23.2871	0.0429423	0.585766		1.02635e-07	0.000645928	0.586089	0.00375548		0.401989	-0.0448616	21.4571	0.0466046	0.535698		7.32941e-05	0.000456834	0.535926	3.79197
						-0.400997	0.0593624	21.9414	0.0455759	0.542287		3.42825e-05	0.000471857	0.542522	1.71718													-0.0132481	0.013253	23.287	0.0429424	0.586412		1.02636e-07	0.000645936	0.586735	0.00375547		0.401991	-0.0444047	21.4234	0.0466779	0.536155		7.32765e-05	0.000456834	0.536383	3.79106
						-0.401116	0.0589055	21.9249	0.0456101	0.542758		3.44465e-05	0.000468473	0.542993	1.73786													-0.0137049	0.0137097	23.287	0.0429425	0.587058		1.02637e-07	0.000645944	0.587381	0.00375546		0.401993	-0.0439479	21.3898	0.0467512	0.536611		7.32551e-05	0.000456833	0.53684	3.78995
						-0.401219	0.0584487	21.9084	0.0456446	0.543227		3.33721e-05	0.000465868	0.54346	1.69307													-0.0141617	0.0141664	23.2869	0.0429426	0.587704		1.02638e-07	0.000645951	0.588027	0.00375546		0.401995	-0.0434911	21.3564	0.0468244	0.537068		7.32305e-05	0.000456833	0.537297	3.78868
						-0.401311	0.0579919	21.8924	0.045678	0.543693		3.2435e-05	0.000463857	0.543925	1.65266													-0.0146185	0.0146231	23.2869	0.0429427	0.58835		1.02835e-07	0.000645957	0.588673	0.00376262		0.401997	-0.0430342	21.323	0.0468977	0.537525		7.32032e-05	0.000456833	0.537753	3.78728
						-0.401391	0.057535	21.8769	0.0457104	0.544157		3.16158e-05	0.000462302	0.544388	1.61634													-0.0150754	0.0150798	23.2868	0.0429428	0.588996		1.43332e-07	0.000645964	0.589319	0.00524431		0.401999	-0.0425774	21.2898	0.0469709	0.537982		7.31739e-05	0.000456832	0.53821	3.78576
						-0.401462	0.0570782	21.8617	0.045742	0.544619		3.08985e-05	0.000461098	0.544849	1.58379													-0.0155322	0.0155365	23.2867	0.0429429	0.589642		1.43333e-07	0.000645969	0.589965	0.0052443		0.402	-0.0421206	21.2567	0.047044	0.538439		7.31432e-05	0.000456832	0.538667	3.78418
						-0.401525	0.0566214	21.847	0.0457729	0.54508		3.02693e-05	0.000460163	0.54531	1.5547													-0.015989	0.0159932	23.2866	0.0429431	0.590288		1.43334e-07	0.000645974	0.590611	0.0052443		0.402001	-0.0416638	21.2237	0.0471172	0.538895		7.31117e-05	0.000456831	0.539124	3.78255
						-0.40158	0.0561646	21.8325	0.0458032	0.54554		2.97167e-05	0.000459436	0.54577	1.52872													-0.0164459	0.0164499	23.2866	0.0429432	0.590934		1.43335e-07	0.000645979	0.591257	0.00524429		0.402003	-0.0412069	21.1908	0.0471903	0.539352		7.308e-05	0.000456831	0.539581	3.78091
						-0.401629	0.0557077	21.8184	0.0458329	0.546		2.88276e-05	0.00045887	0.546229	1.48482													-0.0169027	0.0169066	23.2865	0.0429434	0.59158		1.43335e-07	0.000645983	0.591903	0.00524429		0.402004	-0.0407501	21.158	0.0472634	0.539809		7.30486e-05	0.000456831	0.540038	3.77929
						-0.401672	0.0552509	21.8047	0.0458617	0.546458		2.66034e-05	0.000458431	0.546688	1.37157													-0.0173595	0.0173633	23.2864	0.0429435	0.592226		1.43336e-07	0.000645986	0.592549	0.00524428		0.402005	-0.0402933	21.1254	0.0473364	0.540266		2.32617e-05	0.00045683	0.540494	1.20349
						-0.40171	0.0547941	21.792	0.0458883	0.546917		3.47623e-05	0.000458128	0.547146	1.7934													-0.0178164	0.0178201	23.2863	0.0429436	0.592872		1.43337e-07	0.00064599	0.593195	0.00524428		0.402006	-0.0398364	21.115	0.0473597	0.540723		1.06014e-05	0.00045683	0.540951	0.548482
						-0.401745	0.0543372	21.7755	0.0459231	0.547375		3.43641e-05	0.000457878	0.547604	1.77382													-0.0182732	0.0182768	23.2863	0.0429438	0.593518		1.43337e-07	0.000645993	0.593841	0.00524428		0.402007	-0.0393796	21.1103	0.0473703	0.54118		1.05739e-05	0.00045683	0.541408	0.547057
						-0.401776	0.0538804	21.7593	0.0459575	0.547833		3.39994e-05	0.000457672	0.548062	1.75578													-0.01873	0.0187335	23.2862	0.0429439	0.594164		1.43338e-07	0.000645996	0.594487	0.00524427		0.402007	-0.0389228	21.1056	0.0473809	0.541636		1.05493e-05	0.00045683	0.541865	0.545788
						-0.401803	0.0534236	21.7432	0.0459915	0.548291		3.36664e-05	0.000457503	0.548519	1.73923													-0.0191868	0.0191903	23.2861	0.0429441	0.59481		1.43338e-07	0.000645999	0.595133	0.00524427		0.402008	-0.038466	21.1009	0.0473914	0.542093		1.05276e-05	0.00045683	0.542322	0.544663
						-0.401828	0.0529667	21.7273	0.0460251	0.548748		3.33631e-05	0.000457366	0.548977	1.72407													-0.0196437	0.019647	23.286	0.0429442	0.595456		1.43485e-07	0.000646001	0.595779	0.00524961		0.402008	-0.0380091	21.0962	0.0474019	0.54255		1.05084e-05	0.00045683	0.542779	0.543673
						-0.40185	0.0525099	21.7115	0.0460585	0.549205		3.30875e-05	0.000457255	0.549434	1.71025													-0.0201005	0.0201038	23.2859	0.0429444	0.596102		1.83666e-07	0.000646004	0.596425	0.00671965		0.402009	-0.0375523	21.0915	0.0474124	0.543007		1.04917e-05	0.00045683	0.543235	0.542809
						-0.40187	0.0520531	21.6959	0.0460916	0.549663		3.28377e-05	0.000457166	0.549891	1.69767													-0.0205573	0.0205606	23.2858	0.0429445	0.596748		1.83666e-07	0.000646006	0.597071	0.00671964		0.402009	-0.0370955	21.0868	0.0474229	0.543464		1.04773e-05	0.00045683	0.543692	0.54206
						-0.401888	0.0515963	21.6805	0.0461244	0.55012		3.2612e-05	0.000457094	0.550348	1.68626													-0.0210142	0.0210173	23.2857	0.0429447	0.597394		1.83667e-07	0.000646008	0.597717	0.00671964		0.402009	-0.0366386	21.0822	0.0474334	0.543921		1.04648e-05	0.00045683	0.544149	0.541417
						-0.401903	0.0511394	21.6652	0.046157	0.550577		3.24084e-05	0.000457036	0.550805	1.67595													-0.021471	0.0214741	23.2856	0.0429449	0.59804		1.83667e-07	0.00064601	0.598363	0.00671964		0.402009	-0.0361818	21.0775	0.0474439	0.544377		1.04543e-05	0.00045683	0.544606	0.540871
						-0.401917	0.0506826	21.65	0.0461894	0.551034		3.15758e-05	0.000456991	0.551262	1.63306													-0.0219278	0.0219308	23.2855	0.0429451	0.598686		1.83668e-07	0.000646012	0.599009	0.00671964		0.40201	-0.035725	21.0729	0.0474543	0.544834		1.04454e-05	0.00045683	0.545063	0.540413
						-0.401929	0.0502258	21.6352	0.046221	0.551491		2.9534e-05	0.000456954	0.551719	1.52758													-0.0223847	0.0223876	23.2854	0.0429453	0.599332		1.83668e-07	0.000646014	0.599655	0.00671964		0.40201	-0.0352681	21.0683	0.0474648	0.545291		2.96903e-05	0.00045683	0.54552	1.53608
						-0.40194	0.0497689	21.6214	0.0462505	0.551948		3.05168e-05	0.000456915	0.552176	1.57855													-0.0228415	0.0228444	23.2853	0.0429455	0.599978		1.83668e-07	0.000646015	0.600301	0.00671963		0.40201	-0.0348113	21.0551	0.0474945	0.545748		3.45585e-05	0.00045683	0.545976	1.78795
						-0.401949	0.0493121	21.6071	0.0462811	0.552405		3.03234e-05	0.00045689	0.552633	1.56863													-0.0232983	0.0233012	23.2852	0.0429456	0.600624		1.83669e-07	0.000646017	0.600947	0.00671963		0.40201	-0.0343545	21.0398	0.047529	0.546205		3.45536e-05	0.00045683	0.546433	1.78769
						-0.401956	0.0488553	21.593	0.0463114	0.552862		3.01684e-05	0.000456873	0.55309	1.56067													-0.0237551	0.0237579	23.2851	0.0429458	0.60127		1.83669e-07	0.000646018	0.601593	0.00671963		0.40201	-0.0338977	21.0245	0.0475636	0.546662		3.45515e-05	0.00045683	0.54689	1.78758
						-0.401962	0.0483984	21.5789	0.0463415	0.553319		3.00428e-05	0.000456861	0.553547	1.55421													-0.024212	0.0242147	23.2851	0.042946	0.601916		1.8367e-07	0.00064602	0.602239	0.00671963		0.40201	-0.0334408	21.0092	0.0475981	0.547118		3.45504e-05	0.00045683	0.547347	1.78753
						-0.401968	0.0479416	21.5649	0.0463716	0.553775		2.99401e-05	0.000456853	0.554004	1.54892													-0.0246688	0.0246715	23.285	0.0429462	0.602562		1.83786e-07	0.000646021	0.602885	0.00672389		0.40201	-0.032984	20.994	0.0476327	0.547575		3.45497e-05	0.00045683	0.547804	1.78749
						-0.401972	0.0474848	21.551	0.0464015	0.554232		2.98551e-05	0.000456847	0.554461	1.54455													-0.0251256	0.0251283	23.2849	0.0429464	0.603208		2.23515e-07	0.000646023	0.603531	0.00817737		0.40201	-0.0325272	20.9788	0.0476672	0.548032		3.45493e-05	0.00045683	0.548261	1.78747
						-0.401976	0.047028	21.5372	0.0464314	0.554689		2.97844e-05	0.000456843	0.554918	1.5409													-0.0255825	0.0255851	23.2847	0.0429466	0.603854		2.23516e-07	0.000646024	0.604177	0.00817737		0.40201	-0.0320703	20.9636	0.0477018	0.548489		3.4549e-05	0.00045683	0.548717	1.78745
						-0.40198	0.0465711	21.5234	0.0464612	0.555146		2.9725e-05	0.00045684	0.555374	1.53784													-0.0260393	0.0260418	23.2846	0.0429468	0.6045		2.23516e-07	0.000646025	0.604823	0.00817736		0.40201	-0.0316135	20.9484	0.0477363	0.548946		3.45488e-05	0.00045683	0.549174	1.78744
						-0.401983	0.0461143	21.5096	0.0464909	0.555603		2.96748e-05	0.000456837	0.555831	1.53525													-0.0264961	0.0264986	23.2845	0.042947	0.605146		2.23516e-07	0.000646026	0.605469	0.00817736		0.40201	-0.0311567	20.9333	0.0477709	0.549403		3.45486e-05	0.00045683	0.549631	1.78743
						-0.401985	0.0456575	21.4959	0.0465206	0.55606		2.9624e-05	0.000456836	0.556288	1.53263													-0.0269529	0.0269554	23.2844	0.0429473	0.605792		2.23517e-07	0.000646027	0.606115	0.00817736		0.40201	-0.0306998	20.9181	0.0478054	0.549859		3.45484e-05	0.00045683	0.550088	1.78743
						-0.401988	0.0452006	21.4822	0.0465502	0.556517		7.33046e-05	0.000456834	0.556745	3.7925													-0.0274098	0.0274122	23.2842	0.0429475	0.606438		2.23517e-07	0.000646028	0.606761	0.00817736		0.40201	-0.030243	20.903	0.04784	0.550316		0.000286385	0.00045683	0.550545	14.8167
						-0.40199	0.0447438	21.4484	0.0466235	0.556973		7.329e-05	0.000456834	0.557202	3.79175													-0.0278666	0.027869	23.2841	0.0429477	0.607084		2.23517e-07	0.000646028	0.607407	0.00817736		0.40201	-0.0297862	20.7786	0.0481264	0.550773		0.000350174	0.00045683	0.551001	18.1169
						-0.401992	0.044287	21.4148	0.0466968	0.55743		7.32713e-05	0.000456834	0.557659	3.79079													-0.0283234	0.0283258	23.284	0.0429479	0.60773		2.23517e-07	0.000646029	0.608053	0.00817736		0.40201	-0.0293294	20.6285	0.0484765	0.55123		0.000350175	0.00045683	0.551458	18.1169
						-0.401994	0.0438302	21.3812	0.0467701	0.557887		7.3249e-05	0.000456833	0.558115	3.78964													-0.0287803	0.0287826	23.2839	0.0429482	0.608376		2.23518e-07	0.00064603	0.608699	0.00817736		0.40201	-0.0288725	20.4806	0.0488267	0.551687		0.000350175	0.00045683	0.551915	18.1169
						-0.401996	0.0433733	21.3478	0.0468433	0.558344		7.32237e-05	0.000456833	0.558572	3.78833													-0.0292371	0.0292394	23.2838	0.0429484	0.609022		2.23518e-07	0.000646031	0.609345	0.00817736		0.40201	-0.0284157	20.3348	0.0491769	0.552144		0.000350175	0.00045683	0.552372	18.1169
						-0.401997	0.0429165	21.3144	0.0469165	0.558801		7.31958e-05	0.000456833	0.559029	3.7869													-0.0296939	0.0296962	23.2836	0.0429486	0.609668		2.23615e-07	0.000646031	0.609991	0.00818089		0.40201	-0.0279589	20.191	0.0495271	0.5526		0.000350175	0.00045683	0.552829	18.1169
						-0.401999	0.0424597	21.2812	0.0469897	0.559258		7.31661e-05	0.000456832	0.559486	3.78536													-0.0301508	0.030153	23.2835	0.0429488	0.610314		2.62762e-07	0.000646033	0.610637	0.00961307		0.40201	-0.027502	20.0492	0.0498772	0.553057		0.000350175	0.00045683	0.553286	18.1169
						-0.402	0.0420028	21.2482	0.0470629	0.559714		7.31351e-05	0.000456832	0.559943	3.78376													-0.0306076	0.0306098	23.2834	0.0429491	0.61096		2.62762e-07	0.000646033	0.611283	0.00961307		0.40201	-0.0270452	19.9094	0.0502274	0.553514		0.000350175	0.00045683	0.553742	18.1169
						-0.402002	0.041546	21.2152	0.047136	0.560171		7.31035e-05	0.000456831	0.5604	3.78213													-0.0310644	0.0310666	23.2832	0.0429494	0.611606		2.62763e-07	0.000646034	0.611929	0.00961307		0.40201	-0.0265884	19.7716	0.0505776	0.553971		0.000350175	0.00045683	0.554199	18.1169
						-0.402003	0.0410892	21.1823	0.0472091	0.560628		7.30718e-05	0.000456831	0.560856	3.78049													-0.0315212	0.0315234	23.2831	0.0429496	0.612252		2.62763e-07	0.000646034	0.612575	0.00961307		0.40201	-0.0261316	19.6357	0.0509278	0.554428		0.000350175	0.00045683	0.554656	18.1169
						-0.402004	0.0406323	21.1496	0.0472822	0.561085		6.95898e-05	0.000456831	0.561313	3.60034													-0.0319781	0.0319802	23.2829	0.0429499	0.612898		2.62763e-07	0.000646035	0.613221	0.00961307		0.40201	-0.0256747	19.5016	0.0512779	0.554885		0.000350175	0.00045683	0.555113	18.1169
						-0.402005	0.0401755	21.1185	0.0473518	0.561542		1.06239e-05	0.00045683	0.56177	0.549645													-0.0324349	0.032437	23.2828	0.0429502	0.613544		2.62763e-07	0.000646035	0.613867	0.00961307		0.40201	-0.0252179	19.3693	0.0516281	0.555341		7.47708e-05	0.00045683	0.55557	3.8684
						-0.402006	0.0397187	21.1138	0.0473624	0.561999		1.0594e-05	0.00045683	0.562227	0.548099													-0.0328917	0.0328938	23.2827	0.0429504	0.61419		2.62763e-07	0.000646036	0.614513	0.00961307		0.40201	-0.0247611	19.3413	0.0517029	0.555798		5.07031e-06	0.00045683	0.556027	0.262322
						-0.402007	0.0392619	21.1091	0.047373	0.562455		1.05672e-05	0.00045683	0.562684	0.546715													-0.0333486	0.0333506	23.2825	0.0429507	0.614836		2.62764e-07	0.000646036	0.615159	0.00961307		0.40201	-0.0243042	19.3394	0.0517079	0.556255		5.07016e-06	0.00045683	0.556483	0.262314
						-0.402007	0.038805	21.1044	0.0473836	0.562912		1.05434e-05	0.00045683	0.563141	0.545484													-0.0338054	0.0338074	23.2824	0.0429509	0.615482		2.62764e-07	0.000646037	0.615806	0.00961307		0.40201	-0.0238474	19.3375	0.051713	0.556712		5.07e-06	0.00045683	0.55694	0.262306
						-0.402008	0.0383482	21.0997	0.0473941	0.563369		1.05224e-05	0.00045683	0.563597	0.544395													-0.0342622	0.0342642	23.2822	0.0429512	0.616129		2.62764e-07	0.000646037	0.616452	0.00961307		0.40201	-0.0233906	19.3356	0.0517181	0.557169		5.06983e-06	0.00045683	0.557397	0.262297
						-0.402008	0.0378914	21.095	0.0474046	0.563826		1.05039e-05	0.00045683	0.564054	0.543438													-0.034719	0.034721	23.2821	0.0429515	0.616775		2.62846e-07	0.000646038	0.617098	0.00961607		0.40201	-0.0229337	19.3337	0.0517232	0.557626		5.06964e-06	0.00045683	0.557854	0.262287
						-0.402009	0.0374345	21.0903	0.0474151	0.564283		1.04878e-05	0.00045683	0.564511	0.542605													-0.0351759	0.0351778	23.282	0.0429517	0.617421		3.01279e-07	0.000646039	0.617744	0.0110221		0.40201	-0.0224769	19.3318	0.0517282	0.558082		5.06944e-06	0.00045683	0.558311	0.262277
						-0.402009	0.0369777	21.0856	0.0474256	0.564739		1.04739e-05	0.00045683	0.564968	0.541884													-0.0356327	0.0356346	23.2818	0.042952	0.618067		3.01279e-07	0.000646039	0.61839	0.0110221		0.40201	-0.0220201	19.3299	0.0517333	0.558539		5.06921e-06	0.00045683	0.558768	0.262265
						-0.402009	0.0365209	21.081	0.0474361	0.565196		1.04619e-05	0.00045683	0.565425	0.541267													-0.0360895	0.0360914	23.2816	0.0429523	0.618713		3.01279e-07	0.000646039	0.619036	0.0110221		0.40201	-0.0215633	19.328	0.0517384	0.558996		1.94472e-06	0.00045683	0.559224	0.100614
						-0.40201	0.036064	21.0763	0.0474466	0.565653		1.04518e-05	0.00045683	0.565882	0.540745													-0.0365464	0.0365482	23.2815	0.0429526	0.619359		3.01279e-07	0.00064604	0.619682	0.0110221		0.40201	-0.0211064	19.3273	0.0517403	0.559453		0	0.00045683	0.559681	0
						-0.40201	0.0356072	21.0717	0.047457	0.56611		1.17826e-05	0.00045683	0.566338	0.609592													-0.0370032	0.037005	23.2813	0.0429529	0.620005		3.0128e-07	0.00064604	0.620328	0.0110221		0.40201	-0.0206496	19.3273	0.0517403	0.55991		0	0.00045683	0.560138	0
						-0.40201	0.0351504	21.0665	0.0474688	0.566567		3.45694e-05	0.00045683	0.566795	1.78851													-0.03746	0.0374618	23.2811	0.0429532	0.620651		3.0128e-07	0.00064604	0.620974	0.0110221		0.40201	-0.0201928	19.3273	0.0517403	0.560366		0	0.00045683	0.560595	0
						-0.40201	0.0346936	21.0511	0.0475034	0.567024		3.45566e-05	0.00045683	0.567252	1.78785													-0.0379169	0.0379187	23.281	0.0429535	0.621297		3.0128e-07	0.000646041	0.62162	0.0110221		0.40201	-0.0197359	19.3273	0.0517403	0.560823		0	0.00045683	0.561052	0
						-0.40201	0.0342367	21.0358	0.0475379	0.56748		3.45528e-05	0.00045683	0.567709	1.78765													-0.0383737	0.0383755	23.2808	0.0429538	0.621943		3.0128e-07	0.000646041	0.622266	0.0110221		0.40201	-0.0192791	19.3273	0.0517403	0.56128		0	0.00045683	0.561509	0
						-0.40201	0.0337799	21.0206	0.0475725	0.567937		3.45511e-05	0.00045683	0.568166	1.78756													-0.0388305	0.0388323	23.2806	0.0429541	0.622589		3.0128e-07	0.000646041	0.622912	0.0110221		0.40201	-0.0188223	19.3273	0.0517403	0.561737		0	0.00045683	0.561965	0
						-0.40201	0.0333231	21.0053	0.047607	0.568394		3.45502e-05	0.00045683	0.568623	1.78751													-0.0392873	0.0392891	23.2805	0.0429544	0.623235		3.0128e-07	0.000646042	0.623558	0.0110221		0.40201	-0.0183654	19.3273	0.0517403	0.562194		0	0.00045683	0.562422	0
						-0.40201	0.0328662	20.9901	0.0476416	0.568851		3.45496e-05	0.00045683	0.569079	1.78748													-0.0397442	0.0397459	23.2803	0.0429547	0.623881		3.01351e-07	0.000646042	0.624204	0.0110247		0.40201	-0.0179086	19.3273	0.0517403	0.562651		0	0.00045683	0.562879	0
						-0.40201	0.0324094	20.9749	0.0476761	0.569308		3.45492e-05	0.00045683	0.569536	1.78746													-0.040201	0.0402027	23.2802	0.042955	0.624527		3.3893e-07	0.000646043	0.62485	0.0123995		0.40201	-0.0174518	19.3273	0.0517403	0.563107		0	0.00237641	0.564296	0
						-0.40201	0.0319526	20.9597	0.0477107	0.569765		3.45489e-05	0.00045683	0.569993	1.78745													-0.0406578	0.0406595	23.28	0.0429554	0.625173		3.3893e-07	0.000646043	0.625496	0.0123995		0.40201	-0.0150754	19.3273	0.0517403	0.565484
						-0.40201	0.0314958	20.9445	0.0477452	0.570221		3.45487e-05	0.00045683	0.57045	1.78744													-0.0411147	0.0411163	23.2798	0.0429557	0.625819		3.3893e-07	0.000646043	0.626142	0.0123995
						-0.40201	0.0310389	20.9294	0.0477798	0.570678		3.45485e-05	0.00045683	0.570907	1.78743													-0.0415715	0.0415731	23.2796	0.0429561	0.626465		3.38931e-07	0.000646043	0.626788	0.0123995
						-0.40201	0.0305821	20.9142	0.0478143	0.571135		5.21172e-05	0.00045683	0.571364	2.69638													-0.0420283	0.04203	23.2794	0.0429564	0.627111		3.38931e-07	0.000646044	0.627434	0.0123995
						-0.40201	0.0301253	20.8915	0.0478664	0.571592		0.000350174	0.00045683	0.57182	18.1169													-0.0424852	0.0424868	23.2792	0.0429567	0.627757		3.38931e-07	0.000646044	0.62808	0.0123995
						-0.40201	0.0296684	20.7397	0.0482166	0.572049		0.000350174	0.00045683	0.572277	18.1169													-0.042942	0.0429436	23.2791	0.0429571	0.628403		3.38931e-07	0.000646044	0.628726	0.0123995
						-0.40201	0.0292116	20.5902	0.0485668	0.572506		0.000350175	0.00045683	0.572734	18.1169													-0.0433988	0.0434004	23.2789	0.0429574	0.629049		3.38931e-07	0.000646044	0.629372	0.0123995
						-0.40201	0.0287548	20.4428	0.048917	0.572962		0.000350175	0.00045683	0.573191	18.1169													-0.0438556	0.0438572	23.2787	0.0429578	0.629695		3.38931e-07	0.000646044	0.630018	0.0123995
						-0.40201	0.0282979	20.2975	0.0492671	0.573419		0.000350175	0.00045683	0.573648	18.1169													-0.0443125	0.044314	23.2785	0.0429581	0.630341		3.38931e-07	0.000646045	0.630664	0.0123995
						-0.40201	0.0278411	20.1543	0.0496173	0.573876		0.000350175	0.00045683	0.574105	18.1169													-0.0447693	0.0447708	23.2783	0.0429584	0.630987		3.38994e-07	0.000646045	0.63131	0.0124018
						-0.40201	0.0273843	20.013	0.0499675	0.574333		0.000350175	0.00045683	0.574561	18.1169													-0.0452261	0.0452277	23.2781	0.0429588	0.631634		3.7557e-07	0.000646045	0.631957	0.0137399
						-0.40201	0.0269275	19.8737	0.0503177	0.57479		0.000350175	0.00045683	0.575018	18.1169													-0.045683	0.0456845	23.2779	0.0429591	0.63228		3.75571e-07	0.000646045	0.632603	0.0137399
						-0.40201	0.0264706	19.7364	0.0506678	0.575247		0.000350175	0.00045683	0.575475	18.1169													-0.0461398	0.0461413	23.2777	0.0429595	0.632926		3.75571e-07	0.000646046	0.633249	0.0137399
						-0.40201	0.0260138	19.6009	0.051018	0.575703		0.000350175	0.00045683	0.575932	18.1169													-0.0465966	0.0465981	23.2775	0.0429599	0.633572		3.75571e-07	0.000646046	0.633895	0.0137399
						-0.40201	0.025557	19.4673	0.0513682	0.57616		0.000330919	0.00045683	0.576389	17.1207													-0.0470534	0.0470549	23.2773	0.0429603	0.634218		3.75571e-07	0.000646046	0.634541	0.0137399
						-0.40201	0.0251001	19.3427	0.0516991	0.576617		5.07037e-06	0.00045683	0.576845	0.262325													-0.0475103	0.0475117	23.2771	0.0429606	0.634864		3.75571e-07	0.000646046	0.635187	0.0137399
						-0.40201	0.0246433	19.3408	0.0517042	0.577074		5.07023e-06	0.00045683	0.577302	0.262318													-0.0479671	0.0479686	23.2769	0.042961	0.63551		3.75571e-07	0.000646046	0.635833	0.0137399
						-0.40201	0.0241865	19.3389	0.0517093	0.577531		5.07008e-06	0.00045683	0.577759	0.26231													-0.0484239	0.0484254	23.2767	0.0429614	0.636156		3.75571e-07	0.000646046	0.636479	0.0137399
						-0.40201	0.0237297	19.337	0.0517143	0.577988		5.06992e-06	0.00045683	0.578216	0.262302													-0.0488808	0.0488822	23.2765	0.0429618	0.636802		3.75571e-07	0.000646046	0.637125	0.0137399
						-0.40201	0.0232728	19.3351	0.0517194	0.578444		5.06975e-06	0.00045683	0.578673	0.262293													-0.0493376	0.049339	23.2763	0.0429621	0.637448		3.75571e-07	0.000646047	0.637771	0.0137399
						-0.40201	0.022816	19.3332	0.0517245	0.578901		5.06956e-06	0.00045683	0.57913	0.262283													-0.0497944	0.0497958	23.2761	0.0429625	0.638094		3.75627e-07	0.000646047	0.638417	0.0137419
						-0.40201	0.0223592	19.3313	0.0517295	0.579358		5.06936e-06	0.00045683	0.579586	0.262272													-0.0502513	0.0502527	23.2759	0.0429629	0.63874		4.11043e-07	0.000646047	0.639063	0.0150376
						-0.40201	0.0219023	19.3294	0.0517346	0.579815		5.06912e-06	0.00045683	0.580043	0.26226													-0.0507081	0.0507095	23.2757	0.0429633	0.639386		4.11044e-07	0.000646047	0.639709	0.0150376
						-0.40201	0.0214455	19.3275	0.0517397	0.580272		6.38061e-07	0.00045683	0.5805	0.0330112													-0.0511649	0.0511663	23.2755	0.0429637	0.640032		4.11044e-07	0.000646047	0.640355	0.0150376
						-0.40201	0.0209887	19.3273	0.0517403	0.580729		0	0.00045683	0.580957	0													-0.0516217	0.0516231	23.2752	0.0429641	0.640678		4.11044e-07	0.000646048	0.641001	0.0150376
						-0.40201	0.0205318	19.3273	0.0517403	0.581185		0	0.00045683	0.581414	0													-0.0520786	0.0520799	23.275	0.0429645	0.641324		4.11044e-07	0.000646048	0.641647	0.0150376
						-0.40201	0.020075	19.3273	0.0517403	0.581642		0	0.00045683	0.581871	0													-0.0525354	0.0525368	23.2748	0.042965	0.64197		4.11044e-07	0.000646048	0.642293	0.0150376
						-0.40201	0.0196182	19.3273	0.0517403	0.582099		0	0.00045683	0.582327	0													-0.0529922	0.0529936	23.2746	0.0429654	0.642616		4.11044e-07	0.000646048	0.642939	0.0150376
						-0.40201	0.0191614	19.3273	0.0517403	0.582556		0	0.00045683	0.582784	0													-0.0534491	0.0534504	23.2743	0.0429658	0.643262		4.11044e-07	0.000646048	0.643585	0.0150376
						-0.40201	0.0187045	19.3273	0.0517403	0.583013		0	0.00045683	0.583241	0													-0.0539059	0.0539072	23.2741	0.0429662	0.643908		4.11044e-07	0.000646048	0.644231	0.0150376
						-0.40201	0.0182477	19.3273	0.0517403	0.58347		0	0.00045683	0.583698	0													-0.0543627	0.054364	23.2739	0.0429666	0.644554		4.11044e-07	0.000646048	0.644877	0.0150376
						-0.40201	0.0177909	19.3273	0.0517403	0.583926		0	0.00045683	0.584155	0													-0.0548196	0.0548209	23.2737	0.042967	0.645201		4.11093e-07	0.000646048	0.645524	0.0150394
						-0.40201	0.017334	19.3273	0.0517403	0.584383		0	0.00225866	0.585513	0													-0.0552764	0.0552777	23.2734	0.0429674	0.645847		4.45182e-07	0.000646049	0.64617	0.0162864
						-0.40201	0.0150754	19.3273	0.0517403	0.586642																		-0.0557332	0.0557345	23.2732	0.0429679	0.646493		4.45182e-07	0.000646049	0.646816	0.0162864
																												-0.05619	0.0561913	23.273	0.0429683	0.647139		4.45182e-07	0.000646049	0.647462	0.0162864
																												-0.0566469	0.0566481	23.2727	0.0429688	0.647785		4.45182e-07	0.000646049	0.648108	0.0162864
																												-0.0571037	0.057105	23.2725	0.0429692	0.648431		4.45182e-07	0.000646049	0.648754	0.0162864
																												-0.0575605	0.0575618	23.2722	0.0429696	0.649077		4.45182e-07	0.000646049	0.6494	0.0162864
																												-0.0580174	0.0580186	23.272	0.0429701	0.649723		4.45182e-07	0.000646049	0.650046	0.0162864
																												-0.0584742	0.0584754	23.2718	0.0429705	0.650369		4.45182e-07	0.000646049	0.650692	0.0162864
																												-0.058931	0.0589322	23.2715	0.042971	0.651015		4.45182e-07	0.000646049	0.651338	0.0162864
																												-0.0593878	0.0593891	23.2713	0.0429714	0.651661		4.45182e-07	0.000646049	0.651984	0.0162864
																												-0.0598447	0.0598459	23.271	0.0429719	0.652307		4.45226e-07	0.000646049	0.65263	0.0162881
																												-0.0603015	0.0603027	23.2708	0.0429723	0.652953		4.77806e-07	0.00064605	0.653276	0.0174799
																												-0.0607583	0.0607595	23.2705	0.0429728	0.653599		4.77806e-07	0.00064605	0.653922	0.0174799
																												-0.0612152	0.0612164	23.2703	0.0429733	0.654245		4.77806e-07	0.00064605	0.654568	0.0174799
																												-0.061672	0.0616732	23.27	0.0429738	0.654891		4.77806e-07	0.00064605	0.655214	0.0174799
																												-0.0621288	0.06213	23.2698	0.0429742	0.655537		4.77806e-07	0.00064605	0.65586	0.0174799
																												-0.0625857	0.0625868	23.2695	0.0429747	0.656183		4.77806e-07	0.00064605	0.656506	0.0174799
																												-0.0630425	0.0630437	23.2692	0.0429752	0.656829		4.77806e-07	0.00064605	0.657152	0.0174799
																												-0.0634993	0.0635005	23.269	0.0429757	0.657475		4.77806e-07	0.00064605	0.657798	0.0174799
																												-0.0639561	0.0639573	23.2687	0.0429761	0.658121		4.77806e-07	0.00064605	0.658445	0.0174799
																												-0.064413	0.0644141	23.2685	0.0429766	0.658768		4.77806e-07	0.00064605	0.659091	0.0174799
																												-0.0648698	0.0648709	23.2682	0.0429771	0.659414		4.77846e-07	0.00064605	0.659737	0.0174814
																												-0.0653266	0.0653278	23.2679	0.0429776	0.66006		5.08723e-07	0.000646051	0.660383	0.018611
																												-0.0657835	0.0657846	23.2677	0.0429781	0.660706		5.08723e-07	0.000646051	0.661029	0.018611
																												-0.0662403	0.0662414	23.2674	0.0429786	0.661352		5.08723e-07	0.000646051	0.661675	0.018611
																												-0.0666971	0.0666982	23.2671	0.0429791	0.661998		5.08723e-07	0.000646051	0.662321	0.018611
																												-0.067154	0.0671551	23.2668	0.0429796	0.662644		5.08723e-07	0.000646051	0.662967	0.018611
																												-0.0676108	0.0676119	23.2666	0.0429801	0.66329		5.08723e-07	0.000646051	0.663613	0.018611
																												-0.0680676	0.0680687	23.2663	0.0429806	0.663936		5.08723e-07	0.000646051	0.664259	0.018611
																												-0.0685244	0.0685255	23.266	0.0429811	0.664582		5.08723e-07	0.000646051	0.664905	0.018611
																												-0.0689813	0.0689824	23.2657	0.0429816	0.665228		5.08723e-07	0.000646051	0.665551	0.018611
																												-0.0694381	0.0694392	23.2655	0.0429822	0.665874		5.08723e-07	0.000646051	0.666197	0.018611
																												-0.0698949	0.069896	23.2652	0.0429827	0.66652		5.08759e-07	0.000646051	0.666843	0.0186122
																												-0.0703518	0.0703528	23.2649	0.0429832	0.667166		5.37728e-07	0.000646051	0.667489	0.0196721
																												-0.0708086	0.0708097	23.2646	0.0429837	0.667812		5.37728e-07	0.000646051	0.668135	0.0196721
																												-0.0712654	0.0712665	23.2643	0.0429842	0.668458		5.37729e-07	0.000646051	0.668781	0.0196721
																												-0.0717222	0.0717233	23.264	0.0429848	0.669104		5.37729e-07	0.000646051	0.669427	0.0196721
																												-0.0721791	0.0721801	23.2638	0.0429853	0.66975		5.37729e-07	0.000646051	0.670073	0.0196721
																												-0.0726359	0.072637	23.2635	0.0429859	0.670396		5.37729e-07	0.000646052	0.670719	0.0196721
																												-0.0730927	0.0730938	23.2632	0.0429864	0.671043		5.37729e-07	0.000646052	0.671366	0.0196721
																												-0.0735496	0.0735506	23.2629	0.0429869	0.671689		5.37729e-07	0.000646052	0.672012	0.0196721
																												-0.0740064	0.0740074	23.2626	0.0429875	0.672335		5.37729e-07	0.000646052	0.672658	0.0196721
																												-0.0744632	0.0744643	23.2623	0.042988	0.672981		5.37729e-07	0.000646052	0.673304	0.0196721
																												-0.0749201	0.0749211	23.262	0.0429885	0.673627		5.3776e-07	0.000646052	0.67395	0.0196732
																												-0.0753769	0.0753779	23.2617	0.0429891	0.674273		5.64605e-07	0.000646052	0.674596	0.0206553
																												-0.0758337	0.0758347	23.2614	0.0429897	0.674919		5.64605e-07	0.000646052	0.675242	0.0206553
																												-0.0762905	0.0762916	23.2611	0.0429902	0.675565		5.64605e-07	0.000646052	0.675888	0.0206553
																												-0.0767474	0.0767484	23.2608	0.0429908	0.676211		5.64605e-07	0.000646052	0.676534	0.0206553
																												-0.0772042	0.0772052	23.2605	0.0429913	0.676857		5.64605e-07	0.000646052	0.67718	0.0206553
																												-0.077661	0.077662	23.2602	0.0429919	0.677503		5.64605e-07	0.000646052	0.677826	0.0206553
																												-0.0781179	0.0781189	23.2599	0.0429925	0.678149		5.64605e-07	0.000646052	0.678472	0.0206553
																												-0.0785747	0.0785757	23.2596	0.042993	0.678795		5.64605e-07	0.000646052	0.679118	0.0206553
																												-0.0790315	0.0790325	23.2593	0.0429936	0.679441		5.64605e-07	0.000646052	0.679764	0.0206553
																												-0.0794884	0.0794893	23.259	0.0429942	0.680087		5.64605e-07	0.000646052	0.68041	0.0206553
																												-0.0799452	0.0799462	23.2587	0.0429947	0.680733		5.64633e-07	0.000646052	0.681056	0.0206563
																												-0.080402	0.080403	23.2584	0.0429953	0.681379		5.89122e-07	0.000646052	0.681702	0.0215522
																												-0.0808588	0.0808598	23.258	0.0429959	0.682025		5.89122e-07	0.000646052	0.682348	0.0215522
																												-0.0813157	0.0813167	23.2577	0.0429965	0.682671		5.89122e-07	0.000646053	0.682994	0.0215522
																												-0.0817725	0.0817735	23.2574	0.0429971	0.683317		5.89122e-07	0.000646053	0.683641	0.0215522
																												-0.0822293	0.0822303	23.2571	0.0429977	0.683964		5.89122e-07	0.000646053	0.684287	0.0215522
																												-0.0826862	0.0826871	23.2568	0.0429982	0.68461		5.89122e-07	0.000646053	0.684933	0.0215522
																												-0.083143	0.083144	23.2564	0.0429988	0.685256		5.89122e-07	0.000646053	0.685579	0.0215522
																												-0.0835998	0.0836008	23.2561	0.0429994	0.685902		5.89122e-07	0.000646053	0.686225	0.0215522
																												-0.0840566	0.0840576	23.2558	0.043	0.686548		5.89122e-07	0.000646053	0.686871	0.0215522
																												-0.0845135	0.0845144	23.2555	0.0430006	0.687194		5.89122e-07	0.000646053	0.687517	0.0215522
																												-0.0849703	0.0849713	23.2552	0.0430012	0.68784		5.89146e-07	0.000646053	0.688163	0.0215531
																												-0.0854271	0.0854281	23.2549	0.0430018	0.688486		6.11038e-07	0.000646053	0.688809	0.0223539
																												-0.085884	0.0858849	23.2545	0.0430024	0.689132		6.11038e-07	0.000646053	0.689455	0.0223539
																												-0.0863408	0.0863417	23.2542	0.043003	0.689778		6.11038e-07	0.000646053	0.690101	0.0223539
																												-0.0867976	0.0867986	23.2539	0.0430036	0.690424		6.11038e-07	0.000646053	0.690747	0.0223539
																												-0.0872545	0.0872554	23.2535	0.0430042	0.69107		6.11038e-07	0.000646053	0.691393	0.0223539
																												-0.0877113	0.0877122	23.2532	0.0430048	0.691716		6.11038e-07	0.000646053	0.692039	0.0223539
																												-0.0881681	0.0881691	23.2529	0.0430054	0.692362		6.11038e-07	0.000646053	0.692685	0.0223539
																												-0.0886249	0.0886259	23.2525	0.0430061	0.693008		6.11038e-07	0.000646053	0.693331	0.0223539
																												-0.0890818	0.0890827	23.2522	0.0430067	0.693654		6.11038e-07	0.000646053	0.693977	0.0223539
																												-0.0895386	0.0895395	23.2519	0.0430073	0.6943		6.11038e-07	0.000646053	0.694623	0.0223539
																												-0.0899954	0.0899964	23.2515	0.0430079	0.694946		6.11059e-07	0.000646053	0.695269	0.0223547
																												-0.0904523	0.0904532	23.2512	0.0430085	0.695593		6.301e-07	0.000646053	0.695916	0.0230513
																												-0.0909091	0.09091	23.2509	0.0430091	0.696239		6.301e-07	0.000646053	0.696562	0.0230513
																												-0.0913659	0.0913668	23.2505	0.0430098	0.696885		6.301e-07	0.000646053	0.697208	0.0230513
																												-0.0918228	0.0918237	23.2502	0.0430104	0.697531		6.301e-07	0.000646053	0.697854	0.0230513
																												-0.0922796	0.0922805	23.2499	0.043011	0.698177		6.301e-07	0.000646053	0.6985	0.0230513
																												-0.0927364	0.0927373	23.2495	0.0430116	0.698823		6.301e-07	0.000646053	0.699146	0.0230513
																												-0.0931932	0.0931942	23.2492	0.0430123	0.699469		6.301e-07	0.000646053	0.699792	0.0230513
																												-0.0936501	0.093651	23.2488	0.0430129	0.700115		6.301e-07	0.000646053	0.700438	0.0230513
																												-0.0941069	0.0941078	23.2485	0.0430135	0.700761		6.301e-07	0.000646053	0.701084	0.0230513
																												-0.0945637	0.0945646	23.2482	0.0430142	0.701407		6.301e-07	0.000646053	0.70173	0.0230513
																												-0.0950206	0.0950215	23.2478	0.0430148	0.702053		6.30118e-07	0.000646053	0.702376	0.0230519
																												-0.0954774	0.0954783	23.2475	0.0430154	0.702699		6.46047e-07	0.000646054	0.703022	0.0236347
																												-0.0959342	0.0959351	23.2471	0.0430161	0.703345		6.46047e-07	0.000646054	0.703668	0.0236347
																												-0.096391	0.096392	23.2468	0.0430167	0.703991		6.46047e-07	0.000646054	0.704314	0.0236347
																												-0.0968479	0.0968488	23.2464	0.0430174	0.704637		6.46047e-07	0.000646054	0.70496	0.0236347
																												-0.0973047	0.0973056	23.2461	0.043018	0.705283		6.46047e-07	0.000646054	0.705606	0.0236347
																												-0.0977615	0.0977624	23.2457	0.0430187	0.705929		6.46047e-07	0.000646054	0.706252	0.0236347
																												-0.0982184	0.0982193	23.2454	0.0430193	0.706575		6.46047e-07	0.000646054	0.706898	0.0236347
																												-0.0986752	0.0986761	23.245	0.04302	0.707221		6.46047e-07	0.000646054	0.707544	0.0236347
																												-0.099132	0.0991329	23.2447	0.0430206	0.707868		6.46047e-07	0.000646054	0.708191	0.0236347
																												-0.0995889	0.0995898	23.2443	0.0430212	0.708514		6.46047e-07	0.000646054	0.708837	0.0236347
																												-0.100046	0.100047	23.244	0.0430219	0.70916		6.46062e-07	0.000646054	0.709483	0.0236352
																												-0.100503	0.100503	23.2436	0.0430225	0.709806		6.58611e-07	0.000646054	0.710129	0.0240943
																												-0.100959	0.10096	23.2433	0.0430232	0.710452		6.58611e-07	0.000646054	0.710775	0.0240943
																												-0.101416	0.101417	23.2429	0.0430239	0.711098		6.58611e-07	0.000646054	0.711421	0.0240943
																												-0.101873	0.101874	23.2426	0.0430245	0.711744		6.58611e-07	0.000646054	0.712067	0.0240943
																												-0.10233	0.102331	23.2422	0.0430252	0.71239		6.58611e-07	0.000646054	0.712713	0.0240943
																												-0.102787	0.102788	23.2419	0.0430258	0.713036		6.58611e-07	0.000646054	0.713359	0.0240943
																												-0.103243	0.103244	23.2415	0.0430265	0.713682		6.58611e-07	0.000646054	0.714005	0.0240943
																												-0.1037	0.103701	23.2411	0.0430271	0.714328		6.58611e-07	0.000646054	0.714651	0.0240943
																												-0.104157	0.104158	23.2408	0.0430278	0.714974		6.58611e-07	0.000646054	0.715297	0.0240943
																												-0.104614	0.104615	23.2404	0.0430285	0.71562		6.58611e-07	0.000646054	0.715943	0.0240943
																												-0.105071	0.105072	23.2401	0.0430291	0.716266		6.58621e-07	0.000646054	0.716589	0.0240946
																												-0.105528	0.105529	23.2397	0.0430298	0.716912		6.67515e-07	0.000646054	0.717235	0.02442
																												-0.105984	0.105985	23.2394	0.0430304	0.717558		6.67515e-07	0.000646054	0.717881	0.02442
																												-0.106441	0.106442	23.239	0.0430311	0.718204		6.67515e-07	0.000646054	0.718527	0.02442
																												-0.106898	0.106899	23.2386	0.0430318	0.71885		6.67515e-07	0.000646054	0.719173	0.02442
																												-0.107355	0.107356	23.2383	0.0430325	0.719496		6.67515e-07	0.000646054	0.71982	0.02442
																												-0.107812	0.107813	23.2379	0.0430331	0.720143		6.67515e-07	0.000646054	0.720466	0.02442
																												-0.108269	0.10827	23.2376	0.0430338	0.720789		6.67515e-07	0.000646054	0.721112	0.02442
																												-0.108725	0.108726	23.2372	0.0430345	0.721435		6.67515e-07	0.000646054	0.721758	0.02442
																												-0.109182	0.109183	23.2368	0.0430351	0.722081		6.67515e-07	0.000646054	0.722404	0.02442
																												-0.109639	0.10964	23.2365	0.0430358	0.722727		6.67515e-07	0.000646054	0.72305	0.02442
																												-0.110096	0.110097	23.2361	0.0430365	0.723373		6.67522e-07	0.000646054	0.723696	0.0244203
																												-0.110553	0.110554	23.2358	0.0430371	0.724019		6.72484e-07	0.000646055	0.724342	0.0246018
																												-0.11101	0.11101	23.2354	0.0430378	0.724665		6.72484e-07	0.000646055	0.724988	0.0246018
																												-0.111466	0.111467	23.235	0.0430385	0.725311		6.72484e-07	0.000646055	0.725634	0.0246018
																												-0.111923	0.111924	23.2347	0.0430391	0.725957		6.72484e-07	0.000646055	0.72628	0.0246018
																												-0.11238	0.112381	23.2343	0.0430398	0.726603		6.72484e-07	0.000646055	0.726926	0.0246018
																												-0.112837	0.112838	23.2339	0.0430405	0.727249		6.72484e-07	0.000646055	0.727572	0.0246018
																												-0.113294	0.113295	23.2336	0.0430412	0.727895		6.72484e-07	0.000646055	0.728218	0.0246018
																												-0.113751	0.113751	23.2332	0.0430418	0.728541		6.72484e-07	0.000646055	0.728864	0.0246018
																												-0.114207	0.114208	23.2328	0.0430425	0.729187		6.72484e-07	0.000646055	0.72951	0.0246018
																												-0.114664	0.114665	23.2325	0.0430432	0.729833		6.72484e-07	0.000646055	0.730156	0.0246018
																												-0.115121	0.115122	23.2321	0.0430438	0.730479		6.72487e-07	0.000646055	0.730802	0.0246019
																												-0.115578	0.115579	23.2318	0.0430445	0.731125		6.73241e-07	0.000646054	0.731448	0.0246295
																												-0.116035	0.116036	23.2314	0.0430452	0.731772		6.73241e-07	0.000646054	0.732095	0.0246295
																												-0.116492	0.116492	23.231	0.0430459	0.732418		6.73241e-07	0.000646054	0.732741	0.0246295
																												-0.116948	0.116949	23.2307	0.0430465	0.733064		6.73241e-07	0.000646054	0.733387	0.0246295
																												-0.117405	0.117406	23.2303	0.0430472	0.73371		6.73241e-07	0.000646054	0.734033	0.0246295
																												-0.117862	0.117863	23.2299	0.0430479	0.734356		6.73241e-07	0.000646054	0.734679	0.0246295
																												-0.118319	0.11832	23.2296	0.0430486	0.735002		6.73241e-07	0.000646054	0.735325	0.0246295
																												-0.118776	0.118777	23.2292	0.0430492	0.735648		6.73241e-07	0.000646054	0.735971	0.0246295
																												-0.119233	0.119233	23.2289	0.0430499	0.736294		6.73241e-07	0.000646054	0.736617	0.0246295
																												-0.119689	0.11969	23.2285	0.0430506	0.73694		6.73241e-07	0.000646054	0.737263	0.0246295
																												-0.120146	0.120147	23.2281	0.0430513	0.737586		6.73239e-07	0.000646054	0.737909	0.0246294
																												-0.120603	0.120604	23.2278	0.0430519	0.738232		6.69514e-07	0.000646054	0.738555	0.0244932
																												-0.12106	0.121061	23.2274	0.0430526	0.738878		6.69514e-07	0.000646054	0.739201	0.0244932
																												-0.121517	0.121518	23.227	0.0430533	0.739524		6.69514e-07	0.000646054	0.739847	0.0244932
																												-0.121973	0.121974	23.2267	0.0430539	0.74017		6.69514e-07	0.000646054	0.740493	0.0244932
																												-0.12243	0.122431	23.2263	0.0430546	0.740816		6.69514e-07	0.000646054	0.741139	0.0244932
																												-0.122887	0.122888	23.226	0.0430553	0.741462		6.69514e-07	0.000646054	0.741785	0.0244932
																												-0.123344	0.123345	23.2256	0.0430559	0.742108		6.69514e-07	0.000646054	0.742431	0.0244932
																												-0.123801	0.123802	23.2252	0.0430566	0.742754		6.69514e-07	0.000646054	0.743077	0.0244932
																												-0.124258	0.124259	23.2249	0.0430573	0.7434		6.69514e-07	0.000646054	0.743724	0.0244932
																												-0.124714	0.124715	23.2245	0.043058	0.744047		6.69514e-07	0.000646054	0.74437	0.0244932
																												-0.125171	0.125172	23.2242	0.0430586	0.744693		6.69508e-07	0.000646054	0.745016	0.024493
																												-0.125628	0.125629	23.2238	0.0430593	0.745339		6.61041e-07	0.000646053	0.745662	0.0241832
																												-0.126085	0.126086	23.2234	0.04306	0.745985		6.61041e-07	0.000646053	0.746308	0.0241832
																												-0.126542	0.126543	23.2231	0.0430606	0.746631		6.61041e-07	0.000646053	0.746954	0.0241832
																												-0.126999	0.127	23.2227	0.0430613	0.747277		6.61041e-07	0.000646053	0.7476	0.0241832
																												-0.127455	0.127456	23.2224	0.0430619	0.747923		6.61041e-07	0.000646053	0.748246	0.0241832
																												-0.127912	0.127913	23.222	0.0430626	0.748569		6.61041e-07	0.000646053	0.748892	0.0241832
																												-0.128369	0.12837	23.2217	0.0430633	0.749215		6.61041e-07	0.000646053	0.749538	0.0241832
																												-0.128826	0.128827	23.2213	0.0430639	0.749861		6.61041e-07	0.000646053	0.750184	0.0241832
																												-0.129283	0.129284	23.2209	0.0430646	0.750507		6.61041e-07	0.000646053	0.75083	0.0241832
																												-0.12974	0.12974	23.2206	0.0430652	0.751153		6.61041e-07	0.000646053	0.751476	0.0241832
																												-0.130196	0.130197	23.2202	0.0430659	0.751799		6.6103e-07	0.000646053	0.752122	0.0241828
																												-0.130653	0.130654	23.2199	0.0430666	0.752445		6.4757e-07	0.000646053	0.752768	0.0236904
																												-0.13111	0.131111	23.2195	0.0430672	0.753091		6.4757e-07	0.000646053	0.753414	0.0236904
																												-0.131567	0.131568	23.2192	0.0430679	0.753737		6.4757e-07	0.000646053	0.75406	0.0236904
																												-0.132024	0.132025	23.2188	0.0430685	0.754383		6.4757e-07	0.000646053	0.754706	0.0236904
																												-0.132481	0.132481	23.2185	0.0430692	0.755029		6.4757e-07	0.000646053	0.755352	0.0236904
																												-0.132937	0.132938	23.2181	0.0430698	0.755676		6.4757e-07	0.000646053	0.755999	0.0236904
																												-0.133394	0.133395	23.2178	0.0430704	0.756322		6.4757e-07	0.000646053	0.756645	0.0236904
																												-0.133851	0.133852	23.2174	0.0430711	0.756968		6.4757e-07	0.000646053	0.757291	0.0236904
																												-0.134308	0.134309	23.2171	0.0430717	0.757614		6.4757e-07	0.000646053	0.757937	0.0236904
																												-0.134765	0.134766	23.2167	0.0430724	0.75826		6.4757e-07	0.000646053	0.758583	0.0236904
																												-0.135221	0.135222	23.2164	0.043073	0.758906		6.47554e-07	0.000646053	0.759229	0.0236898
																												-0.135678	0.135679	23.216	0.0430737	0.759552		6.28869e-07	0.000646052	0.759875	0.0230063
																												-0.136135	0.136136	23.2157	0.0430743	0.760198		6.28868e-07	0.000646052	0.760521	0.0230062
																												-0.136592	0.136593	23.2154	0.0430749	0.760844		6.28868e-07	0.000646052	0.761167	0.0230062
																												-0.137049	0.13705	23.215	0.0430756	0.76149		6.28868e-07	0.000646052	0.761813	0.0230062
																												-0.137506	0.137507	23.2147	0.0430762	0.762136		6.28868e-07	0.000646052	0.762459	0.0230062
																												-0.137962	0.137963	23.2143	0.0430768	0.762782		6.28868e-07	0.000646052	0.763105	0.0230062
																												-0.138419	0.13842	23.214	0.0430775	0.763428		6.28868e-07	0.000646052	0.763751	0.0230062
																												-0.138876	0.138877	23.2137	0.0430781	0.764074		6.28868e-07	0.000646052	0.764397	0.0230062
																												-0.139333	0.139334	23.2133	0.0430787	0.76472		6.28868e-07	0.000646052	0.765043	0.0230062
																												-0.13979	0.139791	23.213	0.0430793	0.765366		6.28868e-07	0.000646052	0.765689	0.0230062
																												-0.140247	0.140248	23.2126	0.04308	0.766012		6.28847e-07	0.000646052	0.766335	0.0230055
																												-0.140703	0.140704	23.2123	0.0430806	0.766658		6.04728e-07	0.000646052	0.766981	0.0221231
																												-0.14116	0.141161	23.212	0.0430812	0.767304		6.04725e-07	0.000646052	0.767627	0.022123
																												-0.141617	0.141618	23.2117	0.0430818	0.767951		6.04725e-07	0.000646052	0.768274	0.022123
																												-0.142074	0.142075	23.2113	0.0430824	0.768597		6.04725e-07	0.000646052	0.76892	0.022123
																												-0.142531	0.142532	23.211	0.043083	0.769243		6.04725e-07	0.000646052	0.769566	0.022123
																												-0.142988	0.142989	23.2107	0.0430836	0.769889		6.04725e-07	0.000646051	0.770212	0.022123
																												-0.143444	0.143445	23.2103	0.0430842	0.770535		6.04725e-07	0.000646051	0.770858	0.022123
																												-0.143901	0.143902	23.21	0.0430848	0.771181		6.04725e-07	0.000646051	0.771504	0.022123
																												-0.144358	0.144359	23.2097	0.0430854	0.771827		6.04725e-07	0.000646051	0.77215	0.022123
																												-0.144815	0.144816	23.2094	0.043086	0.772473		6.04725e-07	0.000646051	0.772796	0.022123
																												-0.145272	0.145273	23.209	0.0430867	0.773119		6.04698e-07	0.000646051	0.773442	0.0221221
																												-0.145728	0.14573	23.2087	0.0430873	0.773765		5.74964e-07	0.000646051	0.774088	0.0210343
																												-0.146185	0.146186	23.2084	0.0430878	0.774411		5.74958e-07	0.000646051	0.774734	0.0210341
																												-0.146642	0.146643	23.2081	0.0430884	0.775057		5.74958e-07	0.000646051	0.77538	0.0210341
																												-0.147099	0.1471	23.2078	0.043089	0.775703		5.74958e-07	0.000646051	0.776026	0.0210341
																												-0.147556	0.147557	23.2075	0.0430896	0.776349		5.74958e-07	0.000646051	0.776672	0.0210341
																												-0.148013	0.148014	23.2072	0.0430901	0.776995		5.74958e-07	0.000646051	0.777318	0.0210341
																												-0.148469	0.148471	23.2069	0.0430907	0.777641		5.74958e-07	0.00064605	0.777964	0.0210341
																												-0.148926	0.148927	23.2066	0.0430913	0.778287		5.74958e-07	0.00064605	0.77861	0.0210341
																												-0.149383	0.149384	23.2062	0.0430919	0.778933		5.74958e-07	0.00064605	0.779256	0.0210341
																												-0.14984	0.149841	23.2059	0.0430924	0.779579		5.74958e-07	0.00064605	0.779902	0.0210341
																												-0.150297	0.150298	23.2056	0.043093	0.780225		5.74926e-07	0.00064605	0.780549	0.0210329
																												-0.150754	0.150755	23.2053	0.0430936	0.780872		5.39429e-07	0.00064605	0.781195	0.0197343
																												-0.15121	0.151211	23.205	0.0430941	0.781518		5.3942e-07	0.00064605	0.781841	0.019734
																												-0.151667	0.151668	23.2047	0.0430947	0.782164		5.3942e-07	0.000646049	0.782487	0.019734
																												-0.152124	0.152125	23.2044	0.0430952	0.78281		5.3942e-07	0.000646049	0.783133	0.019734
																												-0.152581	0.152582	23.2042	0.0430957	0.783456		5.39419e-07	0.000646049	0.783779	0.019734
																												-0.153038	0.153039	23.2039	0.0430963	0.784102		5.39419e-07	0.000646049	0.784425	0.019734
																												-0.153494	0.153496	23.2036	0.0430968	0.784748		5.39419e-07	0.000646049	0.785071	0.019734
																												-0.153951	0.153952	23.2033	0.0430974	0.785394		5.39419e-07	0.000646049	0.785717	0.019734
																												-0.154408	0.154409	23.203	0.0430979	0.78604		5.39419e-07	0.000646049	0.786363	0.019734
																												-0.154865	0.154866	23.2027	0.0430984	0.786686		5.39419e-07	0.000646049	0.787009	0.019734
																												-0.155322	0.155323	23.2024	0.043099	0.787332		5.39382e-07	0.000646049	0.787655	0.0197326
																												-0.155779	0.15578	23.2021	0.0430995	0.787978		4.98013e-07	0.000646048	0.788301	0.0182192
																												-0.156235	0.156237	23.2018	0.0431	0.788624		4.97999e-07	0.000646048	0.788947	0.0182187
																												-0.156692	0.156693	23.2016	0.0431005	0.78927		4.97999e-07	0.000646048	0.789593	0.0182187
																												-0.157149	0.15715	23.2013	0.043101	0.789916		4.97998e-07	0.000646048	0.790239	0.0182187
																												-0.157606	0.157607	23.201	0.0431015	0.790562		4.97998e-07	0.000646048	0.790885	0.0182187
																												-0.158063	0.158064	23.2008	0.043102	0.791208		4.97998e-07	0.000646047	0.791531	0.0182187
																												-0.15852	0.158521	23.2005	0.0431025	0.791854		4.97998e-07	0.000646047	0.792177	0.0182187
																												-0.158976	0.158978	23.2002	0.043103	0.7925		4.97998e-07	0.000646047	0.792823	0.0182187
																												-0.159433	0.159434	23.2	0.0431035	0.793146		4.97998e-07	0.000646047	0.793469	0.0182187
																												-0.15989	0.159891	23.1997	0.043104	0.793792		4.97998e-07	0.000646047	0.794116	0.0182187
																												-0.160347	0.160348	23.1994	0.0431045	0.794439		4.97955e-07	0.000646047	0.794762	0.0182171
																												-0.160804	0.160805	23.1992	0.043105	0.795085		4.50653e-07	0.000646046	0.795408	0.0164867
																												-0.16126	0.161262	23.1989	0.0431054	0.795731		4.5063e-07	0.000646046	0.796054	0.0164858
																												-0.161717	0.161719	23.1987	0.0431059	0.796377		4.5063e-07	0.000646045	0.7967	0.0164858
																												-0.162174	0.162175	23.1984	0.0431063	0.797023		4.50629e-07	0.000646045	0.797346	0.0164858
																												-0.162631	0.162632	23.1982	0.0431068	0.797669		4.50629e-07	0.000646045	0.797992	0.0164858
																												-0.163088	0.163089	23.198	0.0431072	0.798315		4.50629e-07	0.000646045	0.798638	0.0164858
																												-0.163545	0.163546	23.1977	0.0431077	0.798961		4.50629e-07	0.000646045	0.799284	0.0164858
																												-0.164001	0.164003	23.1975	0.0431081	0.799607		4.50629e-07	0.000646044	0.79993	0.0164858
																												-0.164458	0.16446	23.1972	0.0431086	0.800253		4.50629e-07	0.000646044	0.800576	0.0164858
																												-0.164915	0.164916	23.197	0.043109	0.800899		4.50629e-07	0.000646044	0.801222	0.0164858
																												-0.165372	0.165373	23.1967	0.0431095	0.801545		4.5058e-07	0.000646044	0.801868	0.016484
																												-0.165829	0.16583	23.1965	0.0431099	0.802191		3.97332e-07	0.000646043	0.802514	0.014536
																												-0.166285	0.166287	23.1963	0.0431103	0.802837		3.97296e-07	0.000646042	0.80316	0.0145348
																												-0.166742	0.166744	23.1961	0.0431107	0.803483		3.97296e-07	0.000646042	0.803806	0.0145348
																												-0.167199	0.167201	23.1959	0.0431111	0.804129		3.97296e-07	0.000646041	0.804452	0.0145348
																												-0.167656	0.167657	23.1956	0.0431115	0.804775		3.97296e-07	0.000646041	0.805098	0.0145348
																												-0.168113	0.168114	23.1954	0.0431119	0.805421		3.97296e-07	0.000646041	0.805744	0.0145348
																												-0.168569	0.168571	23.1952	0.0431123	0.806067		3.97295e-07	0.00064604	0.80639	0.0145348
																												-0.169026	0.169028	23.195	0.0431127	0.806713		3.97295e-07	0.00064604	0.807036	0.0145348
																												-0.169483	0.169485	23.1948	0.0431131	0.807359		3.97295e-07	0.000646039	0.807682	0.0145348
																												-0.16994	0.169941	23.1946	0.0431135	0.808005		3.97295e-07	0.000646039	0.808328	0.0145348
																												-0.170397	0.170398	23.1944	0.0431139	0.808651		3.9724e-07	0.000646039	0.808975	0.0145328
																												-0.170853	0.170855	23.1942	0.0431143	0.809298		3.38091e-07	0.000646037	0.809621	0.0123689
																												-0.17131	0.171312	23.194	0.0431147	0.809944		3.38037e-07	0.000646036	0.810267	0.0123669
																												-0.171767	0.171769	23.1938	0.043115	0.81059		3.38036e-07	0.000646035	0.810913	0.0123669
																												-0.172224	0.172226	23.1936	0.0431153	0.811236		3.38036e-07	0.000646035	0.811559	0.0123669
																												-0.172681	0.172682	23.1934	0.0431157	0.811882		3.38036e-07	0.000646034	0.812205	0.0123669
																												-0.173137	0.173139	23.1932	0.043116	0.812528		3.38035e-07	0.000646033	0.812851	0.0123669
																												-0.173594	0.173596	23.1931	0.0431163	0.813174		3.38035e-07	0.000646033	0.813497	0.0123669
																												-0.174051	0.174053	23.1929	0.0431167	0.81382		3.38035e-07	0.000646032	0.814143	0.0123669
																												-0.174508	0.17451	23.1927	0.043117	0.814466		3.38034e-07	0.000646031	0.814789	0.0123669
																												-0.174965	0.174967	23.1925	0.0431174	0.815112		3.38034e-07	0.00064603	0.815435	0.0123669
																												-0.175421	0.175423	23.1923	0.0431177	0.815758		3.37973e-07	0.000646029	0.816081	0.0123647
																												-0.175878	0.17588	23.1922	0.043118	0.816404		2.7303e-07	0.000646027	0.816727	0.00998879
																												-0.176335	0.176337	23.192	0.0431183	0.81705		2.72946e-07	0.000646025	0.817373	0.00998575
																												-0.176792	0.176794	23.1919	0.0431186	0.817696		2.72945e-07	0.000646024	0.818019	0.00998576
																												-0.177249	0.177251	23.1917	0.0431189	0.818342		2.72945e-07	0.000646022	0.818665	0.00998576
																												-0.177705	0.177708	23.1916	0.0431191	0.818988		2.72944e-07	0.000646021	0.819311	0.00998576
																												-0.178162	0.178164	23.1914	0.0431194	0.819634		2.72944e-07	0.00064602	0.819957	0.00998576
																												-0.178619	0.178621	23.1913	0.0431197	0.82028		2.72943e-07	0.000646018	0.820603	0.00998577
																												-0.179076	0.179078	23.1911	0.0431199	0.820926		2.72942e-07	0.000646016	0.821249	0.00998577
																												-0.179533	0.179535	23.191	0.0431202	0.821572		2.72942e-07	0.000646014	0.821895	0.00998577
																												-0.179989	0.179992	23.1908	0.0431205	0.822218		2.72941e-07	0.000646012	0.822541	0.00998578
																												-0.180446	0.180449	23.1907	0.0431208	0.822864		2.72875e-07	0.00064601	0.823187	0.00998338
																												-0.180903	0.180905	23.1905	0.043121	0.82351		2.02317e-07	0.000646007	0.823833	0.007402
																												-0.18136	0.181362	23.1904	0.0431212	0.824156		2.02181e-07	0.000646001	0.824479	0.0073971
																												-0.181816	0.181819	23.1903	0.0431214	0.824802		2.0218e-07	0.000645998	0.825125	0.0073971
																												-0.182273	0.182276	23.1902	0.0431216	0.825448		2.0218e-07	0.000645995	0.825771	0.00739711
																												-0.18273	0.182733	23.1901	0.0431218	0.826094		2.02179e-07	0.000645991	0.826417	0.00739712
																												-0.183187	0.18319	23.19	0.0431221	0.82674		2.02178e-07	0.000645987	0.827063	0.00739713
																												-0.183643	0.183646	23.1899	0.0431223	0.827386		2.02176e-07	0.000645982	0.827709	0.00739714
																												-0.1841	0.184103	23.1898	0.0431225	0.828032		2.02175e-07	0.000645977	0.828355	0.00739715
																												-0.184557	0.18456	23.1897	0.0431227	0.828678		2.02174e-07	0.000645972	0.829001	0.00739716
																												-0.185013	0.185017	23.1896	0.0431229	0.829324		2.02172e-07	0.000645966	0.829647	0.00739717
																												-0.18547	0.185474	23.1894	0.0431231	0.82997		2.02099e-07	0.000645959	0.830293	0.00739459
																												-0.185927	0.185931	23.1893	0.0431233	0.830616		1.26205e-07	0.000645949	0.830939	0.00461776
																												-0.186384	0.186387	23.1893	0.0431234	0.831262		1.25965e-07	0.000645933	0.831585	0.00460911
																												-0.18684	0.186844	23.1892	0.0431235	0.831908		1.25964e-07	0.000645922	0.832231	0.00460913
																												-0.187297	0.187301	23.1891	0.0431236	0.832554		1.25962e-07	0.000645909	0.832877	0.00460916
																												-0.187754	0.187758	23.1891	0.0431238	0.8332		1.2596e-07	0.000645894	0.833523	0.00460919
																												-0.18821	0.188215	23.189	0.0431239	0.833846		1.25958e-07	0.000645876	0.834168	0.00460923
																												-0.188667	0.188672	23.1889	0.043124	0.834491		1.25955e-07	0.000645856	0.834814	0.00460928
																												-0.189123	0.189128	23.1889	0.0431241	0.835137		1.25951e-07	0.000645831	0.83546	0.00460933
																												-0.18958	0.189585	23.1888	0.0431243	0.835783		1.25947e-07	0.000645801	0.836106	0.0046094
																												-0.190036	0.190042	23.1887	0.0431244	0.836429		1.25943e-07	0.000645765	0.836752	0.00460948
																												-0.190493	0.190499	23.1887	0.0431245	0.837075		1.2586e-07	0.00064572	0.837398	0.00460679
																												-0.190949	0.190956	23.1886	0.0431246	0.83772		4.5133e-08	0.000645661	0.838043	0.00165213
																												-0.191405	0.191412	23.1886	0.0431247	0.838366		4.46011e-08	0.000645561	0.838689	0.00163291
																												-0.191861	0.191869	23.1885	0.0431247	0.839012		4.46007e-08	0.000645457	0.839334	0.00163316
																												-0.192317	0.192326	23.1885	0.0431248	0.839657		4.46001e-08	0.000645317	0.83998	0.00163349
																												-0.192773	0.192783	23.1885	0.0431248	0.840302		4.45994e-08	0.00064512	0.840625	0.00163396
																												-0.193229	0.19324	23.1885	0.0431249	0.840948		4.45982e-08	0.000644831	0.84127	0.00163465
																												-0.193684	0.193697	23.1885	0.0431249	0.841592		4.45964e-08	0.000644383	0.841915	0.00163572
																												-0.194138	0.194153	23.1884	0.043125	0.842237		4.45934e-08	0.000643634	0.842559	0.00163752
																												-0.194592	0.19461	23.1884	0.043125	0.84288		4.45878e-08	0.000642234	0.843201	0.00164088
																												-0.195043	0.195067	23.1884	0.0431251	0.843523		4.45753e-08	0.000639126	0.843842	0.0016484
																												-0.19549	0.195524	23.1884	0.0431251	0.844162		4.44562e-08	0.00062972	0.844477	0.00166855
																												-0.195923	0.195981	23.1883	0.0431251	0.844791		-2.48466e-08	0.000567802	0.845075	-0.00103425
																												-0.196261	0.196438	23.1883	0.0431251	0.845359		2.53759e-08	0.000491127	0.845605	0.00122118
																												-0.195804	0.196257	23.1883	0.0431251	0.84585		9.68482e-10	0.000485459	0.846093	4.71512e-05
																												-0.19564	0.196714	23.1883	0.0431251	0.846336		-3.46755e-11	0.000606886	0.846639	-1.35042e-06
																												-0.195183	0.197114	23.1883	0.0431251	0.846943		1.33966e-10	0.000643608	0.847265	4.91956e-06
																												-0.194726	0.197567	23.1883	0.0431251	0.847586		1.53162e-10	0.000643964	0.847908	5.62137e-06
																												-0.194272	0.198024	23.1883	0.0431251	0.84823		1.6123e-10	0.000641947	0.848551	5.9361e-06
																												-0.193821	0.198481	23.1883	0.0431251	0.848872		5.13563e-08	0.000640497	0.849192	0.00189509
																												-0.193372	0.198938	23.1883	0.0431252	0.849513		8.58208e-08	0.000639247	0.849832	0.00317306
																												-0.192925	0.199394	23.1883	0.0431253	0.850152		8.56684e-08	0.000638088	0.850471	0.00317317
																												-0.192479	0.199851	23.1882	0.0431254	0.85079		8.55223e-08	0.00063698	0.851109	0.00317327
																												-0.192036	0.200308	23.1882	0.0431255	0.851427		8.53801e-08	0.000635903	0.851745	0.00317336
																												-0.191593	0.200765	23.1881	0.0431255	0.852063		6.72588e-08	0.000634847	0.85238	0.002504
																												-0.191152	0.201222	23.1881	0.0431256	0.852698		1.05834e-07	0.000633824	0.853015	0.00394647
																												-0.190713	0.201678	23.188	0.0431257	0.853332		8.54125e-08	0.000632747	0.853648	0.0031904
																												-0.190275	0.202135	23.188	0.0431258	0.853964		8.52719e-08	0.000631627	0.85428	0.0031908
																												-0.189839	0.202592	23.1879	0.0431259	0.854596		8.51351e-08	0.000630539	0.854911	0.00319117
																												-0.189404	0.203049	23.1879	0.043126	0.855227		8.50013e-08	0.000629478	0.855541	0.00319153
																												-0.188971	0.203506	23.1878	0.043126	0.855856		1.1793e-07	0.000628437	0.85617	0.00443523
																												-0.18854	0.203963	23.1878	0.0431262	0.856484		1.69121e-07	0.000627413	0.856798	0.00637084
																												-0.18811	0.204419	23.1877	0.0431263	0.857112		1.68853e-07	0.000626405	0.857425	0.00637099
																												-0.187681	0.204876	23.1876	0.0431265	0.857738		1.68588e-07	0.00062541	0.858051	0.00637112
																												-0.187254	0.205333	23.1875	0.0431267	0.858364		1.68326e-07	0.000624428	0.858676	0.00637123
																												-0.186828	0.20579	23.1874	0.0431268	0.858988		1.4935e-07	0.000623456	0.8593	0.00566179
																												-0.186404	0.206247	23.1873	0.043127	0.859612		1.89393e-07	0.000622526	0.859923	0.0071905
																												-0.185981	0.206704	23.1872	0.0431272	0.860234		1.74089e-07	0.000621639	0.860545	0.0066189
																												-0.18556	0.20716	23.1871	0.0431274	0.860856		1.68245e-07	0.000620652	0.861166	0.00640689
																												-0.185139	0.207617	23.187	0.0431275	0.861476		1.67994e-07	0.000619664	0.861786	0.00640755
																												-0.184721	0.208074	23.187	0.0431277	0.862096		1.67747e-07	0.000618689	0.862405	0.00640819
																												-0.184303	0.208531	23.1869	0.0431279	0.862715		1.67502e-07	0.000617728	0.863024	0.00640881
																												-0.183888	0.208988	23.1868	0.043128	0.863332		2.48391e-07	0.000616778	0.863641	0.00951833
																												-0.183473	0.209445	23.1866	0.0431283	0.863949		2.50468e-07	0.00061584	0.864257	0.00961253
																												-0.18306	0.209901	23.1865	0.0431285	0.864565		2.50097e-07	0.000614911	0.864873	0.00961281
																												-0.182649	0.210358	23.1864	0.0431288	0.86518		2.4973e-07	0.000613993	0.865487	0.00961306
																												-0.182238	0.210815	23.1862	0.043129	0.865794		2.31736e-07	0.000613084	0.866101	0.00893361
																												-0.18183	0.211272	23.1861	0.0431293	0.866407		2.27316e-07	0.000612219	0.866713	0.00877559
																												-0.181422	0.211729	23.186	0.0431295	0.867019		2.97146e-07	0.0006114	0.867325	0.0114868
																												-0.181016	0.212186	23.1858	0.0431298	0.867631		2.62844e-07	0.000610585	0.867936	0.0101743
																												-0.180611	0.212642	23.1857	0.04313	0.868241		2.49715e-07	0.000609701	0.868546	0.00968014
																												-0.180207	0.213099	23.1856	0.0431303	0.868851		2.49372e-07	0.000608798	0.869155	0.00968118
																												-0.179804	0.213556	23.1854	0.0431305	0.86946		2.49032e-07	0.000607905	0.869764	0.00968219
																												-0.179403	0.214013	23.1853	0.0431308	0.870068		2.76895e-07	0.000607021	0.870371	0.0107812
																												-0.179004	0.21447	23.1851	0.0431311	0.870675		3.31435e-07	0.000606146	0.870978	0.0129233
																												-0.178605	0.214927	23.185	0.0431314	0.871281		3.30975e-07	0.00060528	0.871583	0.0129239
																												-0.178208	0.215383	23.1848	0.0431317	0.871886		3.30519e-07	0.000604422	0.872188	0.0129244
																												-0.177812	0.21584	23.1846	0.0431321	0.872491		3.13499e-07	0.000603572	0.872792	0.0122761
																												-0.177418	0.216297	23.1844	0.0431324	0.873094		2.94697e-07	0.000602767	0.873395	0.0115553
																												-0.177025	0.216754	23.1843	0.0431327	0.873697		3.3228e-07	0.000602006	0.873998	0.0130454
																												-0.176632	0.217211	23.1841	0.043133	0.874299		3.79269e-07	0.00060125	0.8746	0.0149089
																												-0.176242	0.217668	23.1839	0.0431334	0.8749		3.75386e-07	0.000600498	0.8752	0.0147748
																												-0.175852	0.218124	23.1837	0.0431338	0.875501		3.30799e-07	0.000599744	0.875801	0.0130362
																												-0.175463	0.218581	23.1835	0.0431341	0.8761		3.30378e-07	0.000598912	0.8764	0.0130378
																												-0.175076	0.219038	23.1833	0.0431344	0.876699		3.29961e-07	0.000598088	0.876998	0.0130392
																												-0.17469	0.219495	23.1832	0.0431347	0.877297		3.71062e-07	0.000597271	0.877596	0.0146835
																												-0.174305	0.219952	23.183	0.0431351	0.877895		4.12126e-07	0.000596461	0.878193	0.0163306
																												-0.173922	0.220408	23.1827	0.0431355	0.878491		4.11595e-07	0.000595659	0.878789	0.0163315
																												-0.173539	0.220865	23.1825	0.0431359	0.879087		3.95552e-07	0.000594864	0.879384	0.0157159
																												-0.173158	0.221322	23.1823	0.0431363	0.879682		3.77848e-07	0.000594112	0.879979	0.0150315
																												-0.172779	0.221779	23.1821	0.0431367	0.880276		3.77377e-07	0.000593405	0.880572	0.0150306
																												-0.1724	0.222236	23.1819	0.0431371	0.880869		4.19952e-07	0.000592701	0.881165	0.0167462
																												-0.172022	0.222693	23.1817	0.0431375	0.881462		4.62016e-07	0.000592001	0.881758	0.0184454
																												-0.171646	0.223149	23.1814	0.043138	0.882054		4.61437e-07	0.000591305	0.88235	0.018444
																												-0.17127	0.223606	23.1812	0.0431384	0.882645		4.6086e-07	0.000590613	0.88294	0.0184425
																												-0.170896	0.224063	23.1809	0.0431389	0.883236		4.17339e-07	0.000589924	0.883531	0.0167204
																												-0.170523	0.22452	23.1807	0.0431393	0.883826		4.11469e-07	0.00058917	0.88412	0.0165063
																												-0.170151	0.224977	23.1805	0.0431397	0.884415		4.49049e-07	0.000588412	0.884709	0.0180371
																												-0.16978	0.225434	23.1802	0.0431402	0.885003		4.93843e-07	0.000587661	0.885297	0.0198617
																												-0.16941	0.22589	23.18	0.0431407	0.885591		4.78794e-07	0.000586916	0.885884	0.0192809
																												-0.169042	0.226347	23.1797	0.0431411	0.886178		4.62204e-07	0.000586213	0.886471	0.0186351
																												-0.168674	0.226804	23.1795	0.0431416	0.886764		4.61678e-07	0.000585554	0.887057	0.0186349
																												-0.168308	0.227261	23.1792	0.0431421	0.88735		4.61153e-07	0.000584897	0.887642	0.0186346
																												-0.167943	0.227718	23.179	0.0431425	0.887935		4.91607e-07	0.000584244	0.888227	0.0198874
																												-0.167578	0.228175	23.1787	0.043143	0.888519		5.46327e-07	0.000583594	0.888811	0.0221256
																												-0.167215	0.228631	23.1784	0.0431436	0.889102		5.45698e-07	0.000582948	0.889394	0.0221247
																												-0.166853	0.229088	23.1781	0.0431441	0.889685		5.45071e-07	0.000582305	0.889976	0.0221237
																												-0.166492	0.229545	23.1778	0.0431447	0.890268		5.44447e-07	0.000581665	0.890558	0.0221226
																												-0.166132	0.230002	23.1775	0.0431452	0.890849		5.361e-07	0.00058103	0.89114	0.0218073
																												-0.165773	0.230459	23.1773	0.0431457	0.89143		5.11913e-07	0.000580386	0.89172	0.0208465
																												-0.165415	0.230916	23.177	0.0431463	0.892011		5.64123e-07	0.000579687	0.892301	0.0230004
																												-0.165058	0.231372	23.1767	0.0431468	0.89259		5.48679e-07	0.000579028	0.89288	0.0223961
																												-0.164702	0.231829	23.1764	0.0431474	0.893169		5.48106e-07	0.000578411	0.893459	0.0223966
																												-0.164348	0.232286	23.1761	0.0431479	0.893748		5.47535e-07	0.000577798	0.894037	0.022397
																												-0.163994	0.232743	23.1758	0.0431485	0.894326		5.46965e-07	0.000577187	0.894614	0.0223974
																												-0.163641	0.2332	23.1755	0.043149	0.894903		5.48074e-07	0.000576579	0.895191	0.0224664
																												-0.163289	0.233657	23.1752	0.0431496	0.895479		6.33146e-07	0.000575973	0.895767	0.025981
																												-0.162938	0.234113	23.1749	0.0431502	0.896055		6.32475e-07	0.000575371	0.896343	0.0259806
																												-0.162589	0.23457	23.1745	0.0431508	0.896631		6.31805e-07	0.000574772	0.896918	0.0259801
																												-0.16224	0.235027	23.1742	0.0431515	0.897205		6.31138e-07	0.000574176	0.897493	0.0259796
																												-0.161892	0.235484	23.1739	0.0431521	0.89778		6.30473e-07	0.000573584	0.898066	0.0259791
																												-0.161545	0.235941	23.1735	0.0431527	0.898353		6.16084e-07	0.000572994	0.89864	0.0254123
																												-0.161199	0.236398	23.1732	0.0431533	0.898926		6.70744e-07	0.000572443	0.899212	0.0276935
																												-0.160854	0.236854	23.1728	0.043154	0.899499		6.45294e-07	0.000571931	0.899785	0.0266666
																												-0.16051	0.237311	23.1725	0.0431546	0.900071		6.36982e-07	0.000571365	0.900356	0.0263492
																												-0.160167	0.237768	23.1721	0.0431553	0.900642		6.36371e-07	0.000570792	0.900927	0.0263503
																												-0.159825	0.238225	23.1718	0.0431559	0.901213		6.35763e-07	0.000570222	0.901498	0.0263515
																												-0.159484	0.238682	23.1714	0.0431566	0.901783		6.35155e-07	0.000569653	0.902068	0.0263526
																												-0.159143	0.239139	23.1711	0.0431572	0.902353		6.78021e-07	0.000569088	0.902637	0.028159
																												-0.158804	0.239595	23.1707	0.0431579	0.902922		7.22727e-07	0.000568525	0.903206	0.0300455
																												-0.158466	0.240052	23.1704	0.0431586	0.90349		7.2202e-07	0.000567965	0.903774	0.0300457
																												-0.158128	0.240509	23.17	0.0431593	0.904058		7.21315e-07	0.000567407	0.904342	0.0300458
																												-0.157792	0.240966	23.1696	0.04316	0.904626		7.07947e-07	0.000566853	0.904909	0.0295178
																												-0.157456	0.241423	23.1692	0.0431607	0.905192		6.93245e-07	0.000566335	0.905476	0.0289312
																												-0.157121	0.241879	23.1688	0.0431614	0.905759		7.0693e-07	0.000565857	0.906042	0.0295273
																												-0.156787	0.242336	23.1684	0.0431621	0.906325		7.84633e-07	0.00056538	0.906607	0.0328005
																												-0.156454	0.242793	23.168	0.0431629	0.90689		7.83931e-07	0.000564903	0.907173	0.0327988
																												-0.156122	0.24325	23.1676	0.0431637	0.907455		7.83228e-07	0.000564427	0.907737	0.032797
																												-0.15579	0.243707	23.1672	0.0431645	0.908019		7.30399e-07	0.000563953	0.908301	0.0306106
																												-0.15546	0.244164	23.1668	0.0431652	0.908583		7.27888e-07	0.000563422	0.908865	0.0305341
																												-0.15513	0.24462	23.1664	0.043166	0.909147		7.27248e-07	0.000562891	0.909428	0.030536
																												-0.154801	0.245077	23.166	0.0431667	0.90971		7.97082e-07	0.000562362	0.909991	0.0334997
																												-0.154473	0.245534	23.1656	0.0431675	0.910272		8.16716e-07	0.000561836	0.910553	0.034357
																												-0.154146	0.245991	23.1651	0.0431683	0.910834		8.04431e-07	0.000561313	0.911115	0.0338718
																												-0.15382	0.246448	23.1647	0.0431691	0.911395		7.9094e-07	0.000560826	0.911676	0.0333326
																												-0.153495	0.246905	23.1643	0.0431699	0.911956		7.90305e-07	0.000560377	0.912236	0.0333325
																												-0.15317	0.247361	23.1639	0.0431707	0.912516		7.8967e-07	0.000559929	0.912796	0.0333324
																												-0.152846	0.247818	23.1634	0.0431715	0.913076		8.22517e-07	0.000559481	0.913356	0.0347467
																												-0.152523	0.248275	23.163	0.0431723	0.913636		8.83433e-07	0.000559034	0.913915	0.0373498
																												-0.152201	0.248732	23.1625	0.0431732	0.914195		8.82702e-07	0.000558588	0.914474	0.0373488
																												-0.15188	0.249189	23.1621	0.0431741	0.914753		8.81973e-07	0.000558143	0.915032	0.0373477
																												-0.151559	0.249646	23.1616	0.0431749	0.915312		8.81243e-07	0.000557699	0.91559	0.0373465
																												-0.151239	0.250102	23.1611	0.0431758	0.915869		8.80515e-07	0.000557255	0.916148	0.0373453
																												-0.15092	0.250559	23.1606	0.0431767	0.916427		8.53226e-07	0.000556813	0.916705	0.0362167
																												-0.150602	0.251016	23.1602	0.0431776	0.916983		8.96008e-07	0.000556346	0.917261	0.0380645
																												-0.150284	0.251473	23.1597	0.0431785	0.91754		8.94423e-07	0.000555885	0.917818	0.0380287
																												-0.149967	0.25193	23.1592	0.0431793	0.918096		8.93764e-07	0.000555463	0.918373	0.0380296
																												-0.149651	0.252387	23.1587	0.0431802	0.918651		8.93104e-07	0.000555041	0.918929	0.0380304
																												-0.149336	0.252843	23.1583	0.0431811	0.919206		8.92443e-07	0.000554619	0.919483	0.0380312
																												-0.149022	0.2533	23.1578	0.043182	0.919761		8.91782e-07	0.000554197	0.920038	0.0380319
																												-0.148708	0.253757	23.1573	0.0431829	0.920315		9.28279e-07	0.000553776	0.920592	0.0396185
																												-0.148395	0.254214	23.1568	0.0431838	0.920869		9.88509e-07	0.000553355	0.921145	0.0422212
																												-0.148083	0.254671	23.1563	0.0431848	0.921422		9.87753e-07	0.000552936	0.921698	0.0422209
																												-0.147771	0.255128	23.1557	0.0431858	0.921975		9.86996e-07	0.000552517	0.922251	0.0422206
																												-0.14746	0.255584	23.1552	0.0431868	0.922527		9.86241e-07	0.000552098	0.922804	0.0422202
																												-0.14715	0.256041	23.1547	0.0431878	0.92308		9.74522e-07	0.000551681	0.923355	0.0417501
																												-0.146841	0.256498	23.1542	0.0431888	0.923631		9.61671e-07	0.000551299	0.923907	0.0412281
																												-0.146532	0.256955	23.1537	0.0431897	0.924183		1.04668e-06	0.000550953	0.924458	0.0449008
																												-0.146224	0.257412	23.1531	0.0431908	0.924733		1.06354e-06	0.000550607	0.925009	0.0456526
																												-0.145917	0.257869	23.1525	0.0431918	0.925284		1.03964e-06	0.000550259	0.925559	0.0446549
																												-0.14561	0.258325	23.152	0.0431929	0.925834		1.00216e-06	0.000549892	0.926109	0.0430738
																												-0.145304	0.258782	23.1514	0.0431939	0.926384		1.00147e-06	0.000549492	0.926659	0.0430756
																												-0.144999	0.259239	23.1509	0.0431949	0.926934		1.00079e-06	0.000549093	0.927208	0.0430774
																												-0.144694	0.259696	23.1504	0.0431959	0.927483		1.0248e-06	0.000548695	0.927757	0.0441431
																												-0.14439	0.260153	23.1498	0.0431969	0.928032		1.10111e-06	0.000548297	0.928306	0.0474647
																												-0.144087	0.260609	23.1492	0.043198	0.92858		1.10033e-06	0.000547899	0.928854	0.0474653
																												-0.143784	0.261066	23.1486	0.0431991	0.929128		1.08983e-06	0.000547503	0.929401	0.0470464
																												-0.143483	0.261523	23.148	0.0432002	0.929675		1.07834e-06	0.00054714	0.929949	0.0465811
																												-0.143182	0.26198	23.1475	0.0432013	0.930222		1.07769e-06	0.000546815	0.930496	0.046581
																												-0.142881	0.262437	23.1469	0.0432024	0.930769		1.07705e-06	0.000546488	0.931042	0.0465808
																												-0.142581	0.262894	23.1463	0.0432034	0.931316		1.14261e-06	0.00054616	0.931589	0.0494462
																												-0.142282	0.26335	23.1457	0.0432046	0.931862		1.18319e-06	0.000545832	0.932135	0.0512328
																												-0.141983	0.263807	23.1451	0.0432058	0.932408		1.18244e-06	0.000545503	0.93268	0.0512316
																												-0.141685	0.264264	23.1444	0.0432069	0.932953		1.1817e-06	0.000545173	0.933226	0.0512303
																												-0.141387	0.264721	23.1438	0.0432081	0.933498		1.18096e-06	0.000544843	0.933771	0.0512291
																												-0.141091	0.265178	23.1432	0.0432093	0.934043		1.18021e-06	0.000544513	0.934315	0.0512277
																												-0.140794	0.265635	23.1425	0.0432105	0.934588		1.13634e-06	0.000544182	0.93486	0.0493534
																												-0.140498	0.266091	23.1419	0.0432116	0.935132		1.20934e-06	0.000543818	0.935404	0.0525593
																												-0.140203	0.266548	23.1413	0.0432128	0.935676		1.20433e-06	0.000543473	0.935947	0.0523748
																												-0.139909	0.267005	23.1406	0.043214	0.936219		1.20367e-06	0.000543165	0.936491	0.0523758
																												-0.139615	0.267462	23.14	0.0432152	0.936762		1.20301e-06	0.000542855	0.937034	0.0523767
																												-0.139322	0.267919	23.1393	0.0432164	0.937305		1.20234e-06	0.000542544	0.937576	0.0523776
																												-0.139029	0.268376	23.1387	0.0432176	0.937848		1.20166e-06	0.000542232	0.938119	0.0523784
																												-0.138737	0.268832	23.1381	0.0432188	0.93839		1.22964e-06	0.000541919	0.938661	0.0536286
																												-0.138446	0.269289	23.1374	0.0432201	0.938932		1.31287e-06	0.000541606	0.939203	0.0572919
																												-0.138155	0.269746	23.1367	0.0432214	0.939473		1.3121e-06	0.000541292	0.939744	0.0572916
																												-0.137864	0.270203	23.136	0.0432227	0.940015		1.31133e-06	0.000540977	0.940285	0.0572913
																												-0.137575	0.27066	23.1353	0.043224	0.940556		1.31056e-06	0.000540662	0.940826	0.0572909
																												-0.137285	0.271117	23.1346	0.0432253	0.941096		1.30056e-06	0.000540346	0.941367	0.0568867
																												-0.136997	0.271573	23.1339	0.0432266	0.941637		1.28963e-06	0.000540065	0.941907	0.0564382
																												-0.136709	0.27203	23.1332	0.0432279	0.942177		1.35132e-06	0.000539819	0.942447	0.059165
																												-0.136421	0.272487	23.1325	0.0432293	0.942717		1.40804e-06	0.000539571	0.942986	0.0616763
																												-0.136134	0.272944	23.1317	0.0432307	0.943256		1.40734e-06	0.000539322	0.943526	0.0616746
																												-0.135847	0.273401	23.131	0.0432321	0.943796		1.37875e-06	0.000539071	0.944065	0.0604497
																												-0.135561	0.273858	23.1302	0.0432335	0.944335		1.33787e-06	0.0005388	0.944604	0.0586868
																												-0.135276	0.274314	23.1295	0.0432348	0.944873		1.33717e-06	0.000538499	0.945143	0.0586888
																												-0.13499	0.274771	23.1288	0.0432361	0.945412		1.33647e-06	0.000538198	0.945681	0.0586908
																												-0.134706	0.275228	23.1281	0.0432375	0.94595		1.4253e-06	0.000537897	0.946219	0.0626271
																												-0.134422	0.275685	23.1273	0.0432389	0.946488		1.45354e-06	0.000537594	0.946757	0.0639036
																												-0.134139	0.276142	23.1265	0.0432404	0.947026		1.445e-06	0.000537292	0.947294	0.063564
																												-0.133856	0.276599	23.1258	0.0432418	0.947563		1.4357e-06	0.000537023	0.947831	0.0631868
																												-0.133573	0.277055	23.125	0.0432432	0.9481		1.43509e-06	0.00053679	0.948368	0.0631869
																												-0.133292	0.277512	23.1242	0.0432447	0.948637		1.43446e-06	0.000536555	0.948905	0.0631871
																												-0.13301	0.277969	23.1235	0.0432461	0.949173		1.43383e-06	0.000536318	0.949441	0.0631872
																												-0.132729	0.278426	23.1227	0.0432475	0.94971		1.55434e-06	0.000536079	0.949978	0.0685286
																												-0.132449	0.278883	23.1219	0.0432491	0.950246		1.55911e-06	0.000535839	0.950514	0.0687695
																												-0.132169	0.27934	23.121	0.0432506	0.950781		1.55838e-06	0.000535597	0.951049	0.0687686
																												-0.131889	0.279796	23.1202	0.0432522	0.951317		1.55765e-06	0.000535353	0.951585	0.0687675
																												-0.13161	0.280253	23.1194	0.0432538	0.951852		1.55691e-06	0.000535108	0.95212	0.0687665
																												-0.131331	0.28071	23.1185	0.0432553	0.952388		1.55617e-06	0.000534862	0.952655	0.0687654
																												-0.131053	0.281167	23.1177	0.0432569	0.952922		1.56394e-06	0.000534614	0.95319	0.0691407
																												-0.130775	0.281624	23.1169	0.0432584	0.953457		1.62925e-06	0.0005344	0.953724	0.0720567
																												-0.130498	0.28208	23.116	0.0432601	0.953991		1.59554e-06	0.000534198	0.954259	0.0705928
																												-0.130221	0.282537	23.1152	0.0432617	0.954526		1.5949e-06	0.000533974	0.954793	0.0705941
																												-0.129945	0.282994	23.1143	0.0432633	0.95506		1.59426e-06	0.000533747	0.955326	0.0705954
																												-0.129669	0.283451	23.1134	0.0432649	0.955593		1.5936e-06	0.000533518	0.95586	0.0705966
																												-0.129393	0.283908	23.1126	0.0432664	0.956127		1.59294e-06	0.000533288	0.956394	0.0705979
																												-0.129118	0.284365	23.1117	0.043268	0.95666		1.62902e-06	0.000533055	0.956927	0.0722283
																												-0.128843	0.284821	23.1109	0.0432697	0.957193		1.72635e-06	0.000532821	0.95746	0.0765777
																												-0.128569	0.285278	23.11	0.0432714	0.957726		1.72559e-06	0.000532585	0.957992	0.0765778
																												-0.128295	0.285735	23.109	0.0432731	0.958259		1.72482e-06	0.000532347	0.958525	0.0765778
																												-0.128022	0.286192	23.1081	0.0432748	0.958791		1.71673e-06	0.000532108	0.959057	0.076253
																												-0.127749	0.286649	23.1072	0.0432766	0.959323		1.70796e-06	0.000531904	0.959589	0.0758925
																												-0.127477	0.287106	23.1063	0.0432783	0.959855		1.70742e-06	0.000531736	0.960121	0.0758923
																												-0.127204	0.287562	23.1054	0.04328	0.960387		1.76307e-06	0.000531566	0.960652	0.0783912
																												-0.126933	0.288019	23.1044	0.0432817	0.960918		1.85118e-06	0.000531392	0.961184	0.0823355
																												-0.126661	0.288476	23.1034	0.0432836	0.96145		1.85054e-06	0.000531216	0.961715	0.0823342
																												-0.12639	0.288933	23.1025	0.0432854	0.961981		1.84988e-06	0.000531038	0.962246	0.0823328
																												-0.126119	0.28939	23.1015	0.0432873	0.962512		1.84922e-06	0.000530857	0.962777	0.0823315
																												-0.125849	0.289847	23.1005	0.0432891	0.963043		1.83401e-06	0.000530674	0.963308	0.0816822
																												-0.125579	0.290303	23.0995	0.043291	0.963573		1.76811e-06	0.000530481	0.963839	0.0787761
																												-0.125309	0.29076	23.0986	0.0432927	0.964104		1.83655e-06	0.00053025	0.964369	0.081861
																												-0.12504	0.291217	23.0976	0.0432946	0.964634		1.90554e-06	0.000530017	0.964899	0.0849732
																												-0.124771	0.291674	23.0966	0.0432965	0.965164		1.89888e-06	0.00052982	0.965429	0.0847076
																												-0.124503	0.292131	23.0955	0.0432984	0.965694		1.89832e-06	0.00052966	0.965959	0.0847083
																												-0.124235	0.292588	23.0945	0.0433003	0.966224		1.89775e-06	0.000529497	0.966488	0.084709
																												-0.123967	0.293044	23.0935	0.0433022	0.966753		1.89717e-06	0.00052933	0.967018	0.0847096
																												-0.1237	0.293501	23.0925	0.0433041	0.967283		1.89658e-06	0.000529161	0.967547	0.0847103
																												-0.123433	0.293958	23.0915	0.043306	0.967812		1.98106e-06	0.00052899	0.968076	0.0885126
																												-0.123166	0.294415	23.0904	0.043308	0.968341		2.05132e-06	0.000528815	0.968605	0.0916821
																												-0.1229	0.294872	23.0894	0.04331	0.968869		2.05063e-06	0.000528638	0.969134	0.0916816
																												-0.122634	0.295329	23.0883	0.0433121	0.969398		2.04992e-06	0.000528459	0.969662	0.0916811
																												-0.122368	0.295785	23.0872	0.0433141	0.969927		2.04921e-06	0.000528277	0.970191	0.0916806
																												-0.122103	0.296242	23.0861	0.0433162	0.970455		2.04136e-06	0.000528094	0.970719	0.0913612
																												-0.121838	0.296699	23.085	0.0433182	0.970983		2.03287e-06	0.000527946	0.971247	0.091007
																												-0.121573	0.297156	23.0839	0.0433202	0.971511		2.13188e-06	0.000527836	0.971775	0.0954591
																												-0.121309	0.297613	23.0828	0.0433224	0.972039		2.20086e-06	0.000527723	0.972303	0.0985692
																												-0.121045	0.29807	23.0816	0.0433246	0.972566		2.20034e-06	0.000527606	0.97283	0.0985678
																												-0.120781	0.298526	23.0804	0.0433268	0.973094		2.17034e-06	0.000527486	0.973358	0.0972458
																												-0.120517	0.298983	23.0793	0.0433289	0.973622		2.10908e-06	0.000527348	0.973885	0.0945258
																												-0.120253	0.29944	23.0781	0.043331	0.974149		2.10844e-06	0.000527178	0.974412	0.0945277
																												-0.11999	0.299897	23.077	0.0433332	0.974676		2.10779e-06	0.000527005	0.97494	0.0945296
																												-0.119728	0.300354	23.0759	0.0433353	0.975203		2.21074e-06	0.000526829	0.975466	0.0991796
																												-0.119465	0.300811	23.0747	0.0433375	0.97573		2.27542e-06	0.000526651	0.975993	0.102116
																												-0.119203	0.301267	23.0735	0.0433397	0.976257		2.26968e-06	0.000526471	0.97652	0.101893
																												-0.118941	0.301724	23.0723	0.043342	0.976783		2.26356e-06	0.000526327	0.977046	0.101646
																												-0.11868	0.302181	23.0711	0.0433443	0.977309		2.26312e-06	0.000526223	0.977572	0.101646
																												-0.118419	0.302638	23.0699	0.0433465	0.977836		2.26266e-06	0.000526115	0.978099	0.101646
																												-0.118158	0.303095	23.0687	0.0433488	0.978362		2.26218e-06	0.000526003	0.978625	0.101647
																												-0.117897	0.303551	23.0675	0.0433511	0.978888		2.37514e-06	0.000525887	0.979151	0.106746
																												-0.117637	0.304008	23.0662	0.0433534	0.979414		2.44524e-06	0.000525768	0.979676	0.109921
																												-0.117376	0.304465	23.0649	0.0433559	0.979939		2.44465e-06	0.000525645	0.980202	0.10992
																												-0.117116	0.304922	23.0636	0.0433583	0.980465		2.44405e-06	0.000525519	0.980728	0.10992
																												-0.116857	0.305379	23.0623	0.0433608	0.98099		2.44343e-06	0.00052539	0.981253	0.109919
																												-0.116597	0.305836	23.061	0.0433632	0.981516		2.4428e-06	0.000525259	0.981779	0.109918
																												-0.116338	0.306292	23.0597	0.0433657	0.982041		2.43485e-06	0.000525124	0.982304	0.109588
																												-0.116079	0.306749	23.0584	0.0433681	0.982566		2.5473e-06	0.000525027	0.982829	0.114671
																												-0.11582	0.307206	23.0571	0.0433706	0.983091		2.62024e-06	0.000524971	0.983354	0.117967
																												-0.115561	0.307663	23.0557	0.0433733	0.983616		2.52306e-06	0.000524908	0.983879	0.113605
																												-0.115303	0.30812	23.0543	0.0433758	0.984141		2.52256e-06	0.000524799	0.984404	0.113607
																												-0.115045	0.308577	23.053	0.0433783	0.984666		2.52205e-06	0.000524686	0.984928	0.113608
																												-0.114787	0.309033	23.0517	0.0433808	0.985191		2.52151e-06	0.000524569	0.985453	0.113609
																												-0.114529	0.30949	23.0503	0.0433834	0.985715		2.52096e-06	0.000524448	0.985977	0.11361
																												-0.114271	0.309947	23.049	0.0433859	0.98624		2.63647e-06	0.000524324	0.986502	0.118844
																												-0.114014	0.310404	23.0476	0.0433885	0.986764		2.72181e-06	0.000524196	0.987026	0.122721
																												-0.113757	0.310861	23.0461	0.0433912	0.987288		2.72114e-06	0.000524066	0.98755	0.122721
																												-0.1135	0.311318	23.0447	0.043394	0.987812		2.71555e-06	0.000523932	0.988074	0.1225
																												-0.113243	0.311774	23.0432	0.0433967	0.988336		2.70964e-06	0.000523837	0.988598	0.122256
																												-0.112987	0.312231	23.0418	0.0433994	0.98886		2.70937e-06	0.000523785	0.989122	0.122256
																												-0.112731	0.312688	23.0404	0.0434021	0.989384		2.70908e-06	0.000523728	0.989646	0.122256
																												-0.112475	0.313145	23.0389	0.0434048	0.989908		2.82643e-06	0.000523666	0.990169	0.127567
																												-0.112219	0.313602	23.0374	0.0434076	0.990431		2.93026e-06	0.0005236	0.990693	0.13227
																												-0.111963	0.314059	23.0359	0.0434106	0.990955		2.92985e-06	0.00052353	0.991217	0.132269
																												-0.111707	0.314515	23.0343	0.0434135	0.991478		2.92941e-06	0.000523455	0.99174	0.132268
																												-0.111452	0.314972	23.0328	0.0434164	0.992002		2.92896e-06	0.000523377	0.992263	0.132267
																												-0.111196	0.315429	23.0312	0.0434193	0.992525		2.92848e-06	0.000523294	0.992787	0.132266
																												-0.110941	0.315886	23.0297	0.0434223	0.993048		2.92798e-06	0.000523208	0.99331	0.132266
																												-0.110686	0.316343	23.0281	0.0434252	0.993572		2.97773e-06	0.000523119	0.993833	0.134536
																												-0.110431	0.3168	23.0265	0.0434282	0.994095		3.03333e-06	0.000523048	0.994356	0.137067
																												-0.110176	0.317256	23.0249	0.0434312	0.994618		3.03306e-06	0.000522998	0.994879	0.137067
																												-0.109922	0.317713	23.0233	0.0434342	0.995141		3.03275e-06	0.000522943	0.995402	0.137068
																												-0.109667	0.31817	23.0217	0.0434373	0.995664		3.03241e-06	0.000522883	0.995925	0.137069
																												-0.109413	0.318627	23.0201	0.0434403	0.996187		3.03205e-06	0.000522817	0.996448	0.137069
																												-0.109158	0.319084	23.0185	0.0434433	0.996709		3.03166e-06	0.000522747	0.996971	0.13707
																												-0.108904	0.319541	23.0169	0.0434464	0.997232		3.13261e-06	0.000522673	0.997494	0.141655
																												-0.10865	0.319997	23.0152	0.0434495	0.997755		3.27779e-06	0.000522594	0.998016	0.148242
																												-0.108397	0.320454	23.0135	0.0434528	0.998277		3.27726e-06	0.000522511	0.998539	0.148241
																												-0.108143	0.320911	23.0117	0.0434561	0.9988		3.27671e-06	0.000522424	0.999061	0.148241
																												-0.10789	0.321368	23.01	0.0434593	0.999322		3.27077e-06	0.000522333	0.999584	0.147998
																												-0.107636	0.321825	23.0083	0.0434626	0.999845		3.26452e-06	0.000522285	1.00011	0.147729
																												-0.107383	0.322281	23.0066	0.0434659	1.00037		3.26451e-06	0.000522283	1.00063	0.147729
																												-0.10713	0.322738	23.0048	0.0434691	1.00089		3.35616e-06	0.000522276	1.00115	0.151879
																												-0.106877	0.323195	23.0031	0.0434725	1.00141		3.53802e-06	0.000522264	1.00167	0.160112
																												-0.106624	0.323652	23.0012	0.043476	1.00193		3.53789e-06	0.000522246	1.00219	0.160112
																												-0.106371	0.324109	22.9993	0.0434796	1.00246		3.53773e-06	0.000522222	1.00272	0.160112
																												-0.106118	0.324566	22.9974	0.0434831	1.00298		3.53753e-06	0.000522194	1.00324	0.160111
																												-0.105865	0.325022	22.9956	0.0434866	1.0035		3.53729e-06	0.000522161	1.00376	0.160111
																												-0.105612	0.325479	22.9937	0.0434902	1.00402		3.44731e-06	0.000522124	1.00428	0.156049
																												-0.105359	0.325936	22.9919	0.0434936	1.00454		3.47293e-06	0.000522049	1.00481	0.157231
																												-0.105106	0.326393	22.99	0.0434971	1.00507		3.67705e-06	0.000521954	1.00533	0.166503
																												-0.104854	0.32685	22.9881	0.0435008	1.00559		3.67477e-06	0.000521904	1.00585	0.166415
																												-0.104601	0.327307	22.9862	0.0435045	1.00611		3.67477e-06	0.000521904	1.00637	0.166415
																												-0.104349	0.327763	22.9842	0.0435081	1.00663		3.67473e-06	0.000521897	1.00689	0.166415
																												-0.104097	0.32822	22.9823	0.0435118	1.00715		3.67464e-06	0.000521884	1.00742	0.166416
																												-0.103844	0.328677	22.9803	0.0435155	1.00768		3.67451e-06	0.000521866	1.00794	0.166416
																												-0.103592	0.329134	22.9784	0.0435192	1.0082		3.72686e-06	0.000521841	1.00846	0.168795
																												-0.10334	0.329591	22.9764	0.0435229	1.00872		3.98372e-06	0.000521812	1.00898	0.180439
																												-0.103088	0.330048	22.9743	0.0435269	1.00924		3.98345e-06	0.000521776	1.0095	0.180438
																												-0.102836	0.330504	22.9722	0.0435308	1.00976		3.98314e-06	0.000521736	1.01002	0.180438
																												-0.102584	0.330961	22.9701	0.0435348	1.01029		3.98279e-06	0.000521691	1.01055	0.180438
																												-0.102332	0.331418	22.968	0.0435388	1.01081		3.97566e-06	0.000521641	1.01107	0.180132
																												-0.10208	0.331875	22.9659	0.0435428	1.01133		3.96818e-06	0.000521639	1.01159	0.179794
																												-0.101828	0.332332	22.9638	0.0435468	1.01185		3.99631e-06	0.00052169	1.01211	0.181051
																												-0.101576	0.332789	22.9617	0.0435508	1.01237		4.31525e-06	0.000521734	1.01263	0.195484
																												-0.101324	0.333245	22.9594	0.0435551	1.01289		4.31557e-06	0.000521771	1.01315	0.195485
																												-0.101072	0.333702	22.9572	0.0435594	1.01342		4.31584e-06	0.000521802	1.01368	0.195485
																												-0.10082	0.334159	22.9549	0.0435637	1.01394		4.31606e-06	0.000521826	1.0142	0.195486
																												-0.100568	0.334616	22.9526	0.043568	1.01446		4.19515e-06	0.000521845	1.01472	0.190003
																												-0.100315	0.335073	22.9504	0.0435722	1.01498		4.1529e-06	0.000521818	1.01524	0.188099
																												-0.100063	0.33553	22.9482	0.0435764	1.0155		4.15256e-06	0.000521772	1.01576	0.1881
																												-0.099811	0.335986	22.946	0.0435805	1.01602		4.50305e-06	0.000521721	1.01629	0.203996
																												-0.099559	0.336443	22.9437	0.043585	1.01655		4.5029e-06	0.000521664	1.01681	0.204012
																												-0.0993071	0.3369	22.9413	0.0435895	1.01707		4.50016e-06	0.000521659	1.01733	0.203889
																												-0.0990553	0.337357	22.9389	0.043594	1.01759		4.50058e-06	0.00052171	1.01785	0.203889
																												-0.0988033	0.337814	22.9366	0.0435985	1.01811		4.50095e-06	0.000521753	1.01837	0.203889
																												-0.0985513	0.338271	22.9342	0.043603	1.01863		4.50125e-06	0.000521789	1.01889	0.203888
																												-0.0982991	0.338727	22.9318	0.0436075	1.01915		4.50149e-06	0.000521817	1.01942	0.203888
																												-0.0980469	0.339184	22.9295	0.043612	1.01968		4.8621e-06	0.000521839	1.01994	0.220212
																												-0.0977947	0.339641	22.9269	0.0436169	1.0202		4.90096e-06	0.000521854	1.02046	0.221966
																												-0.0975424	0.340098	22.9243	0.0436218	1.02072		4.90105e-06	0.000521863	1.02098	0.221966
																												-0.0972901	0.340555	22.9217	0.0436267	1.02124		4.90107e-06	0.000521866	1.0215	0.221966
																												-0.0970379	0.341012	22.9192	0.0436316	1.02176		4.90104e-06	0.000521862	1.02203	0.221966
																												-0.0967856	0.341468	22.9166	0.0436365	1.02229		4.89145e-06	0.000521853	1.02255	0.221535
																												-0.0965333	0.341925	22.914	0.0436414	1.02281		4.88135e-06	0.000521899	1.02307	0.221059
																												-0.096281	0.342382	22.9115	0.0436463	1.02333		5.25103e-06	0.000522005	1.02359	0.237752
																												-0.0960284	0.342839	22.9087	0.0436515	1.02385		5.3349e-06	0.000522102	1.02411	0.241504
																												-0.0957756	0.343296	22.9059	0.0436569	1.02437		5.33588e-06	0.000522192	1.02464	0.241507
																												-0.0955226	0.343752	22.9031	0.0436622	1.0249		5.17009e-06	0.000522274	1.02516	0.233967
																												-0.0952695	0.344209	22.9004	0.0436674	1.02542		5.13406e-06	0.0005223	1.02568	0.232324
																												-0.0950163	0.344666	22.8977	0.0436725	1.02594		5.13413e-06	0.000522308	1.0262	0.232324
																												-0.0947631	0.345123	22.895	0.0436776	1.02646		5.13414e-06	0.000522309	1.02672	0.232324
																												-0.0945099	0.34558	22.8923	0.0436828	1.02699		5.47726e-06	0.000522303	1.02725	0.247853
																												-0.0942567	0.346037	22.8895	0.0436882	1.02751		5.59927e-06	0.000522291	1.02777	0.25338
																												-0.0940035	0.346493	22.8865	0.0436938	1.02803		5.59489e-06	0.000522272	1.02829	0.253191
																												-0.0937504	0.34695	22.8836	0.0436994	1.02855		5.59069e-06	0.000522312	1.02881	0.252982
																												-0.0934972	0.347407	22.8807	0.043705	1.02907		5.59179e-06	0.000522417	1.02934	0.252981
																												-0.0932438	0.347864	22.8777	0.0437106	1.0296		5.5928e-06	0.000522512	1.02986	0.252981
																												-0.0929901	0.348321	22.8748	0.0437162	1.03012		5.59372e-06	0.000522598	1.03038	0.25298
																												-0.0927363	0.348778	22.8719	0.0437218	1.03064		5.94666e-06	0.000522676	1.0309	0.268902
																												-0.0924824	0.349234	22.8688	0.0437277	1.03116		6.12716e-06	0.000522746	1.03143	0.277027
																												-0.0922283	0.349691	22.8656	0.0437339	1.03169		6.1279e-06	0.000522808	1.03195	0.277028
																												-0.091974	0.350148	22.8624	0.04374	1.03221		6.12856e-06	0.000522861	1.03247	0.277029
																												-0.0917197	0.350605	22.8592	0.0437461	1.03273		6.12912e-06	0.000522908	1.03299	0.27703
																												-0.0914653	0.351062	22.856	0.0437523	1.03326		6.12959e-06	0.000522947	1.03352	0.277031
																												-0.0912107	0.351519	22.8528	0.0437584	1.03378		6.11579e-06	0.000522979	1.03404	0.27639
																												-0.0909561	0.351975	22.8496	0.0437645	1.0343		6.46457e-06	0.000523075	1.03456	0.292099
																												-0.0907014	0.352432	22.8462	0.043771	1.03483		6.7067e-06	0.00052324	1.03509	0.302944
																												-0.0904462	0.352889	22.8427	0.0437777	1.03535		6.45499e-06	0.000523394	1.03561	0.291488
																												-0.0901908	0.353346	22.8393	0.0437841	1.03587		6.45591e-06	0.000523473	1.03613	0.291486
																												-0.0899352	0.353803	22.836	0.0437906	1.0364		6.45672e-06	0.000523542	1.03666	0.291484
																												-0.0896795	0.35426	22.8326	0.043797	1.03692		6.45742e-06	0.000523602	1.03718	0.291482
																												-0.0894236	0.354716	22.8292	0.0438035	1.03744		6.45802e-06	0.000523653	1.0377	0.291481
																												-0.0891676	0.355173	22.8259	0.04381	1.03797		6.80327e-06	0.000523695	1.03823	0.307039
																												-0.0889116	0.35563	22.8223	0.0438168	1.03849		7.09435e-06	0.000523729	1.03875	0.320155
																												-0.0886555	0.356087	22.8186	0.0438239	1.03901		7.0947e-06	0.000523755	1.03928	0.320155
																												-0.0883993	0.356544	22.8149	0.043831	1.03954		7.08803e-06	0.000523773	1.0398	0.319843
																												-0.0881431	0.357001	22.8112	0.043838	1.04006		7.08152e-06	0.000523859	1.04032	0.319496
																												-0.0878867	0.357457	22.8076	0.0438451	1.04058		7.0837e-06	0.00052402	1.04085	0.319496
																												-0.08763	0.357914	22.8039	0.0438522	1.04111		7.08572e-06	0.00052417	1.04137	0.319496
																												-0.0873729	0.358371	22.8002	0.0438593	1.04163		7.4545e-06	0.000524309	1.0419	0.336036
																												-0.0871156	0.358828	22.7963	0.0438667	1.04216		7.82678e-06	0.000524438	1.04242	0.352731
																												-0.0868581	0.359285	22.7922	0.0438746	1.04268		7.82863e-06	0.000524557	1.04294	0.352734
																												-0.0866003	0.359742	22.7882	0.0438824	1.04321		7.83032e-06	0.000524666	1.04347	0.352737
																												-0.0863422	0.360198	22.7841	0.0438902	1.04373		7.83187e-06	0.000524765	1.04399	0.35274
																												-0.086084	0.360655	22.78	0.0438981	1.04426		7.83328e-06	0.000524856	1.04452	0.352742
																												-0.0858256	0.361112	22.776	0.0439059	1.04478		7.83455e-06	0.000524938	1.04504	0.352744
																												-0.085567	0.361569	22.7719	0.0439137	1.04531		8.05944e-06	0.000525011	1.04557	0.362819
[truncated: 183 more rows]
[truncated: 54 more columns]

## Sheet: Cond_matrix
																				0.0423132	0.0423135	0.0423138	0.0423142	0.0423146	0.0423151	0.0423156	0.0423162	0.0423168	0.0423176	0.0423183	0.0423192	0.0423202	0.0423213	0.0423225	0.0423238	0.0423252	0.0423268	0.0423286	0.0423305	0.0423326	0.0423349	0.0423375	0.0423403	0.0423434	0.0423468	0.0423505	0.0423546	0.042359	0.0423639
[truncated: 160 more rows]
[truncated: 131 more columns]
