# Supplementary material for: Trajectories and Forces in Four-Electrode Chambers Operated in Object-Shift, Dielectrophoresis and Field-Cage Modes – Considerations from the System’s Point of View
Source: Preprints.org preprint supplement (doi:10.20944/preprints202309.2147.v1), 2023-09-30
Supplement: Supplementary file 3 [file Tab. S2_++-- 0,1-in-1.xls]

## Sheet: Four Side Pointed +-+-__Obj_0
Basic Resistance	Basic Conductance	Mean Resistance	Mean Conductance	k		a_X	a_y	a_Resistance in Route	a_Conductance along trajectory	a_Trajectory length		a_Delta Cond	a_Step width along trajectory	a_Mid-distance	a_norm. Force (Delta Cond./basic/diSTep)		b_X	b_Y	b_Resistance in Routh	b_Conductance along trajectory	b_Trajectory length		b-Delta Cond	b_Step width along trajectory	b_Mid-distance	b_norm. Force (Delta Cond./basic/diSTep)		c_X	c_Y	c_Resistance in Routh	c_Conductance along trajectory	c_Trajectory length		c_Delta Cond	c_Step width along trajectory	c_Mid-distance	c_norm. Force (Delta Cond./basic/diSTep)		d_X	d_Y	d_Resistance in Routh	d_Conductance along trajectory	d_Trajectory length		d_Delta Cond	d_Step width along trajectory	d_Mid-distance	d_norm. Force (Delta Cond./basic/diSTep)
2.36439	0.422942	2.41902	0.414107	0.422942		0	0.40201	5.89382	0.169669	0		0.0145587	0.00045683	0.000228415	75.3508		-0.080402	0.40201	2.64355	0.37828	0		0.000740486	0.000504609	0.000252304	3.46962		-0.40201	0.0854271	2.62294	0.381252	0		0.000653717	0.000505104	0.000252552	3.06005		0.20603	-0.20603	2.41349	0.414338	0		9.32628e-07	0.000646055	0.000323027	0.00341317
						6.9957e-07	0.401553	5.42806	0.184228	0.00045683		0.0145587	0.00045683	0.000685245	75.3508		-0.0806163	0.401553	2.63838	0.37902	0.000504609		0.000740486	0.000503658	0.000756438	3.47617		-0.401553	0.0856426	2.61845	0.381906	0.000505104		0.000652717	0.000504295	0.000757252	3.06027		0.206487	-0.206487	2.41348	0.414339	0.000646055		9.32628e-07	0.000646055	0.000969082	0.00341317
						1.53862e-06	0.401096	5.03052	0.198787	0.000913661		0.0145588	0.000456831	0.00114208	75.3509		-0.0808284	0.401096	2.63324	0.379761	0.00100827		0.000739128	0.000502696	0.00125961	3.47643		-0.401096	0.0858562	2.61398	0.382558	0.0010094		0.000651699	0.000503475	0.00126114	3.06047		0.206944	-0.206944	2.41348	0.41434	0.00129211		9.32628e-07	0.000646055	0.00161514	0.00341317
						2.52836e-06	0.40064	4.68723	0.213346	0.00137049		0.0145588	0.000456831	0.00159891	75.351		-0.0810382	0.40064	2.62812	0.3805	0.00151096		0.000737742	0.000501723	0.00176182	3.47664		-0.40064	0.0860679	2.60954	0.38321	0.00151287		0.00065066	0.000502647	0.0017642	3.06063		0.207401	-0.207401	2.41347	0.414341	0.00193816		9.32628e-07	0.000646055	0.00226119	0.00341317
						3.68137e-06	0.400183	4.38781	0.227904	0.00182732		0.0145588	0.000456832	0.00205574	75.3512		-0.0812456	0.400183	2.62304	0.381238	0.00201269		0.000736326	0.000500738	0.00226305	3.47679		-0.400183	0.0862775	2.60511	0.383861	0.00201552		0.000649602	0.000501809	0.00226643	3.06075		0.207857	-0.207857	2.41347	0.414342	0.00258422		9.32628e-07	0.000646055	0.00290725	0.00341317
						5.0119e-06	0.399726	4.12434	0.242463	0.00228415		0.0145589	0.000456832	0.00251257	75.3513		-0.0814507	0.399726	2.61798	0.381974	0.00251342		0.000734879	0.000499742	0.00276329	3.47688		-0.399726	0.0864852	2.60071	0.38451	0.00251733		0.000648521	0.00050096	0.00276781	3.06084		0.208314	-0.208314	2.41346	0.414343	0.00323027		9.32628e-07	0.000646055	0.0035533	0.00341317
						6.53612e-06	0.399269	3.89072	0.257022	0.00274099		0.0145589	0.000456833	0.0029694	75.3515		-0.0816533	0.399269	2.61295	0.382709	0.00301317		0.000733399	0.000498733	0.00326253	3.47689		-0.399269	0.0866908	2.59633	0.385159	0.00301829		0.000647418	0.000500102	0.00326834	3.06088		0.208771	-0.208771	2.41345	0.414344	0.00387633		9.32628e-07	0.000646055	0.00419936	0.00341317
						8.27253e-06	0.398812	3.68214	0.271581	0.00319782		0.014559	0.000456834	0.00342624	75.3516		-0.0818534	0.398812	2.60796	0.383442	0.0035119		0.000686562	0.000497712	0.00376075	3.26153		-0.398812	0.0868943	2.59197	0.385806	0.00351839		0.000606356	0.000499232	0.00376801	2.87174		0.209228	-0.209228	2.41345	0.414345	0.00452238		9.32628e-07	0.000646055	0.00484541	0.00341317
						1.02424e-05	0.398355	3.49479	0.28614	0.00365465		0.0145591	0.000456835	0.00388307	75.3517		-0.082051	0.398355	2.60329	0.384129	0.00400961		0.00062425	0.000496677	0.00425795	2.97169		-0.398355	0.0870956	2.58791	0.386413	0.00401762		0.000557226	0.000498351	0.0042668	2.64372		0.209685	-0.209685	2.41344	0.414346	0.00516844		9.32628e-07	0.000646055	0.00549146	0.00341317
						1.24703e-05	0.397899	3.32558	0.300699	0.00411149		0.0145591	0.000456837	0.00433991	75.3518		-0.0822459	0.397899	2.59907	0.384753	0.00450629		0.000623098	0.000495629	0.0047541	2.97248		-0.397899	0.0872948	2.58418	0.38697	0.00451597		0.000556349	0.000497458	0.0047647	2.64429		0.210142	-0.210142	2.41344	0.414347	0.00581449		9.32628e-07	0.000646055	0.00613752	0.00341317
						1.49849e-05	0.397442	3.172	0.315258	0.00456832		0.0145592	0.000456838	0.00479674	75.3519		-0.0824381	0.397442	2.59487	0.385376	0.00500192		0.000621917	0.000494568	0.0052492	2.97321		-0.397442	0.0874917	2.58047	0.387526	0.00501343		0.000555452	0.000496554	0.00526171	2.64484		0.210598	-0.210598	2.41343	0.414348	0.00646055		9.32628e-07	0.000646055	0.00678357	0.00341317
						1.782e-05	0.396985	3.03198	0.329817	0.00502516		0.0027484	0.000456841	0.00525358	14.2244		-0.0826276	0.396985	2.59069	0.385998	0.00549648		0.000485193	0.000493491	0.00574323	2.32463		-0.396985	0.0876863	2.57678	0.388082	0.00550999		0.000434239	0.000495636	0.00575781	2.0715		0.211055	-0.211055	2.41343	0.414349	0.0071066		1.84761e-06	0.000646055	0.00742963	0.00676178
						2.10157e-05	0.396528	3.00692	0.332566	0.005482		0.0027494	0.000456842	0.00571042	14.2295		-0.0828142	0.396528	2.58743	0.386483	0.00598998		0.000485752	0.000493985	0.00623697	2.32498		-0.396528	0.0878785	2.5739	0.388516	0.00600562		0.000434828	0.000496223	0.00625374	2.07186		0.211512	-0.211512	2.41342	0.41435	0.00775266		1.84761e-06	0.000646055	0.00807568	0.00676178
						2.4432e-05	0.396071	2.98227	0.335315	0.00593885		0.00274944	0.000456844	0.00616727	14.2297		-0.0830022	0.396071	2.58419	0.386969	0.00648396		0.000486346	0.000494514	0.00673122	2.32534		-0.396071	0.0880723	2.57102	0.388951	0.00650185		0.000435455	0.000496851	0.00675027	2.07222		0.211969	-0.211969	2.41341	0.414352	0.00839871		1.84761e-06	0.000646055	0.00872174	0.00676178
						2.81045e-05	0.395614	2.95801	0.338065	0.00639569		0.0027495	0.000456847	0.00662411	14.2299		-0.0831916	0.395614	2.58094	0.387455	0.00697848		0.000486979	0.000495081	0.00722602	2.3257		-0.395614	0.0882677	2.56814	0.389386	0.0069987		0.000436122	0.000497525	0.00724746	2.07258		0.212426	-0.212426	2.41339	0.414354	0.00904476		1.84761e-06	0.000646055	0.00936779	0.00676178
						3.20781e-05	0.395158	2.93415	0.340814	0.00685254		0.00274956	0.00045685	0.00708096	14.2301		-0.0833824	0.395158	2.5777	0.387942	0.00747356		0.000444171	0.00049569	0.0077214	2.11865		-0.395158	0.0884647	2.56527	0.389822	0.00749622		0.000394613	0.000498249	0.00774535	1.8726		0.212883	-0.212883	2.41338	0.414356	0.00969082		1.84761e-06	0.000646055	0.0100138	0.00676178
						3.64108e-05	0.394701	2.91067	0.343564	0.00730939		0.00274964	0.000456854	0.00753781	14.2304		-0.0835748	0.394701	2.57476	0.388386	0.00796925		0.000422824	0.000496346	0.00821742	2.01416		-0.394701	0.0886636	2.56268	0.390217	0.00799447		0.000381556	0.000499028	0.00824399	1.80781		0.213339	-0.213339	2.41337	0.414358	0.0103369		1.84761e-06	0.000646055	0.0106599	0.00676178
						4.11792e-05	0.394244	2.88756	0.346313	0.00776624		0.00274974	0.00045686	0.00799467	14.2307		-0.0837688	0.394244	2.57196	0.388809	0.00846559		0.000423416	0.000497053	0.00871412	2.01411		-0.394244	0.0888645	2.56017	0.390598	0.0084935		0.000382191	0.00049987	0.00874344	1.80777		0.213796	-0.213796	2.41336	0.41436	0.0109829		1.84761e-06	0.000646055	0.011306	0.00676178
						4.64873e-05	0.393787	2.86481	0.349063	0.0082231		0.00274987	0.000456869	0.00845154	14.2311		-0.0839647	0.393787	2.56916	0.389233	0.00896265		0.000424051	0.000497819	0.00921156	2.01403		-0.393787	0.0890674	2.55767	0.390981	0.00899337		0.000382873	0.000500779	0.00924376	1.8077		0.214253	-0.214253	2.41335	0.414361	0.011629		1.84761e-06	0.000646055	0.011952	0.00676178
						5.24814e-05	0.39333	2.84242	0.351813	0.00867997		0.00275003	0.000456882	0.00890841	14.2316		-0.0841625	0.39333	2.56636	0.389657	0.00946046		0.000424733	0.000498648	0.00970979	2.01391		-0.39333	0.0892725	2.55517	0.391363	0.00949415		0.000383605	0.000501765	0.00974503	1.8076		0.21471	-0.21471	2.41334	0.414363	0.012275		1.84761e-06	0.000646055	0.0125981	0.00676178
						5.93768e-05	0.392873	2.82037	0.354563	0.00913685		0.00275026	0.000456902	0.0093653	14.2321		-0.0843624	0.392873	2.56357	0.390081	0.00995911		0.000425467	0.000499549	0.0102089	2.01376		-0.392873	0.0894801	2.55267	0.391747	0.00999591		0.000384392	0.000502837	0.0102473	1.80745		0.215167	-0.215167	2.41333	0.414365	0.0129211		1.84761e-06	0.000646055	0.0132441	0.00676178
						6.7509e-05	0.392417	2.79866	0.357313	0.00959375		0.00275059	0.000456938	0.00982222	14.2327		-0.0845646	0.392417	2.56077	0.390507	0.0104587		0.00042626	0.000500532	0.0107089	2.01355		-0.392417	0.0896902	2.55017	0.392131	0.0104988		0.000385242	0.000504005	0.0107508	1.80725		0.215624	-0.215624	2.41332	0.414367	0.0135671		1.84761e-06	0.000646055	0.0138902	0.00676178
						7.74438e-05	0.39196	2.77729	0.360064	0.0100507		0.00131714	0.000457009	0.0102792	6.81437		-0.0847691	0.39196	2.55798	0.390933	0.0109592		0.000374952	0.000501605	0.01121	1.76739		-0.39196	0.0899031	2.54766	0.392517	0.0110028		0.000333722	0.000505282	0.0112554	1.5616		0.21608	-0.21608	2.41331	0.414369	0.0142132		2.79304e-06	0.000646055	0.0145362	0.0102218
						9.02504e-05	0.391503	2.76716	0.361381	0.0105077		0.00131971	0.000457023	0.0107362	6.82747		-0.0849763	0.391503	2.55553	0.391308	0.0114608		0.000328895	0.000501844	0.0117117	1.54956		-0.391503	0.090119	2.5455	0.39285	0.011508		0.000300405	0.000505587	0.0117608	1.40485		0.216537	-0.216537	2.41329	0.414372	0.0148593		2.79304e-06	0.000646055	0.0151823	0.0102218
						0.000103553	0.391046	2.75709	0.362701	0.0109647		0.00131979	0.000457039	0.0111932	6.82765		-0.085184	0.391046	2.55338	0.391637	0.0119626		0.00032905	0.000502093	0.0122137	1.54952		-0.391046	0.0903356	2.54355	0.393151	0.0120136		0.000304609	0.000505906	0.0122666	1.42361		0.216994	-0.216994	2.41328	0.414374	0.0155053		2.79304e-06	0.000646055	0.0158283	0.0102218
						0.000117399	0.390589	2.7471	0.36402	0.0114218		0.00131988	0.000457058	0.0116503	6.82784		-0.0853923	0.390589	2.55124	0.391966	0.0124647		0.000337483	0.000502353	0.0127159	1.58841		-0.390589	0.090553	2.54158	0.393455	0.0125195		0.000309474	0.000506221	0.0127726	1.44545		0.217451	-0.217451	2.41326	0.414377	0.0161514		2.79304e-06	0.000646055	0.0164744	0.0102218
						0.00013184	0.390132	2.73717	0.36534	0.0118788		0.00131998	0.000457079	0.0121074	6.82804		-0.0856013	0.390132	2.54905	0.392304	0.0129671		0.000339305	0.000502584	0.0132184	1.59625		-0.390132	0.0907711	2.53959	0.393765	0.0130258		0.000309676	0.000506528	0.013279	1.44552		0.217908	-0.217908	2.41324	0.41438	0.0167974		2.79304e-06	0.000646055	0.0171204	0.0102218
						0.000146939	0.389676	2.72732	0.36666	0.0123359		0.00132009	0.000457104	0.0125645	6.82824		-0.0858108	0.389676	2.54684	0.392643	0.0134697		0.000339477	0.000502818	0.0137211	1.59631		-0.389676	0.0909899	2.53759	0.394075	0.0135323		0.000309888	0.00050685	0.0137857	1.44559		0.218365	-0.218365	2.41323	0.414383	0.0174435		2.79304e-06	0.000646055	0.0177665	0.0102218
						0.000162768	0.389219	2.71754	0.36798	0.012793		0.00132022	0.000457133	0.0130216	6.82844		-0.0860209	0.389219	2.54464	0.392982	0.0139725		0.000339657	0.000503065	0.014224	1.59638		-0.389219	0.0912095	2.5356	0.394385	0.0140391		0.000310111	0.00050719	0.0142927	1.44566		0.218821	-0.218821	2.41321	0.414386	0.0180895		2.79304e-06	0.000646055	0.0184126	0.0102218
						0.000179411	0.388762	2.70782	0.369301	0.0132501		0.00132035	0.000457167	0.0134787	6.82864		-0.0862316	0.388762	2.54245	0.393322	0.0144756		0.000339846	0.000503325	0.0147272	1.59644		-0.388762	0.0914298	2.5336	0.394695	0.0145463		0.000310345	0.000507548	0.0148001	1.44573		0.219278	-0.219278	2.41319	0.414388	0.0187356		2.79304e-06	0.000646055	0.0190586	0.0102218
						0.00019697	0.388305	2.69817	0.370621	0.0137073		0.00132051	0.000457208	0.0139359	6.82884		-0.0864428	0.388305	2.54025	0.393662	0.0149789		0.000320897	0.000503598	0.0152307	1.50661		-0.388305	0.091651	2.53161	0.395005	0.0150539		0.000283664	0.000507925	0.0153078	1.32045		0.219735	-0.219735	2.41318	0.414391	0.0193816		2.79304e-06	0.000646055	0.0197047	0.0102218
						0.000215565	0.387848	2.68859	0.371942	0.0141645		0.00132069	0.000457258	0.0143931	6.82902		-0.0866548	0.387848	2.53818	0.393983	0.0154825		0.000299428	0.000503887	0.0157344	1.405		-0.387848	0.091873	2.5298	0.395289	0.0155618		0.000274751	0.000508324	0.015816	1.27796		0.220192	-0.220192	2.41316	0.414394	0.0200277		2.79304e-06	0.000646055	0.0203507	0.0102218
						0.000235342	0.387392	2.67908	0.373262	0.0146218		0.00132089	0.000457319	0.0148504	6.82918		-0.0868674	0.387392	2.53625	0.394282	0.0159864		0.000299604	0.000504192	0.0162385	1.40498		-0.387392	0.0920959	2.52804	0.395563	0.0160701		0.000274973	0.000508745	0.0163245	1.27794		0.220649	-0.220649	2.41315	0.414397	0.0206737		2.79304e-06	0.000646055	0.0209968	0.0102218
						0.000256483	0.386935	2.66963	0.374583	0.0150791		0.000799221	0.000457395	0.0153078	4.13138		-0.0870808	0.386935	2.53433	0.394582	0.0164906		0.000274431	0.000504515	0.0167428	1.28611		-0.386935	0.0923198	2.52628	0.395838	0.0165789		0.000253244	0.00050919	0.0168335	1.17592		0.221106	-0.221106	2.41313	0.4144	0.0213198		3.76343e-06	0.000646055	0.0216428	0.0137732
						0.000279214	0.386478	2.66395	0.375382	0.0155365		0.000804962	0.000457427	0.0157652	4.16076		-0.0872949	0.386478	2.53257	0.394856	0.0169951		0.000274497	0.000504629	0.0172474	1.28613		-0.386478	0.0925447	2.52467	0.396092	0.0170881		0.000253334	0.000509362	0.0173427	1.17594		0.221562	-0.221562	2.41311	0.414403	0.0219659		3.76343e-06	0.000646055	0.0222889	0.0137732
						0.000302583	0.386021	2.65825	0.376187	0.0159939		0.000805049	0.000457462	0.0162226	4.16089		-0.0875092	0.386021	2.53081	0.395131	0.0174997		0.000274565	0.000504747	0.0177521	1.28615		-0.386021	0.09277	2.52305	0.396345	0.0175974		0.000253427	0.000509541	0.0178522	1.17596		0.222019	-0.222019	2.41309	0.414407	0.0226119		3.76343e-06	0.000646055	0.0229349	0.0137732
						0.000326633	0.385564	2.65257	0.376992	0.0164514		0.000805143	0.000457501	0.0166801	4.16102		-0.0877239	0.385564	2.52905	0.395405	0.0180045		0.000274634	0.000504868	0.0182569	1.28616		-0.385564	0.0929957	2.52144	0.396598	0.018107		0.000253524	0.000509726	0.0183618	1.17598		0.222476	-0.222476	2.41306	0.414411	0.023258		3.76343e-06	0.000646055	0.023581	0.0137732
						0.000351411	0.385107	2.64692	0.377797	0.0169089		0.000805244	0.000457544	0.0171376	4.16115		-0.0879388	0.385107	2.5273	0.39568	0.0185093		0.000274706	0.000504993	0.0187618	1.28618		-0.385107	0.0932218	2.51983	0.396852	0.0186167		0.000243278	0.000509917	0.0188716	1.12803		0.222933	-0.222933	2.41304	0.414415	0.023904		3.76343e-06	0.000646055	0.024227	0.0137732
						0.000376972	0.384651	2.64129	0.378603	0.0173664		0.000805352	0.000457592	0.0175952	4.16128		-0.0881541	0.384651	2.52554	0.395955	0.0190143		0.000244715	0.000505122	0.0192669	1.14547		-0.384651	0.0934484	2.51829	0.397095	0.0191266		0.000225995	0.000510116	0.0193817	1.04749		0.22339	-0.22339	2.41302	0.414418	0.0245501		3.76343e-06	0.000646055	0.0248731	0.0137732
						0.000403374	0.384194	2.63568	0.379408	0.017824		0.000805469	0.000457645	0.0180528	4.1614		-0.0883696	0.384194	2.52398	0.396199	0.0195194		0.000244135	0.000505255	0.0197721	1.14246		-0.384194	0.0936753	2.51686	0.397321	0.0196367		0.000226084	0.000510323	0.0198919	1.04747		0.223847	-0.223847	2.413	0.414422	0.0251961		3.76343e-06	0.000646055	0.0255192	0.0137732
						0.000430683	0.383737	2.6301	0.380214	0.0182817		0.000805596	0.000457705	0.0185105	4.16151		-0.0885854	0.383737	2.52243	0.396443	0.0200247		0.000244199	0.000505392	0.0202774	1.14244		-0.383737	0.0939028	2.51542	0.397547	0.020147		0.000226175	0.000510537	0.0204023	1.04746		0.224303	-0.224303	2.41298	0.414426	0.0258422		3.76343e-06	0.000646055	0.0261652	0.0137732
						0.000458976	0.38328	2.62454	0.381019	0.0187394		0.000805734	0.000457772	0.0189682	4.16161		-0.0888016	0.38328	2.52088	0.396688	0.0205301		0.000244265	0.000505533	0.0207828	1.14243		-0.38328	0.0941307	2.51399	0.397773	0.0206576		0.000226271	0.00051076	0.020913	1.04744		0.22476	-0.22476	2.41295	0.41443	0.0264882		3.76343e-06	0.000646055	0.0268113	0.0137732
						0.000488338	0.382823	2.619	0.381825	0.0191971		0.000805884	0.000457848	0.0194261	4.16169		-0.0890181	0.382823	2.51932	0.396932	0.0210356		0.000244333	0.000505679	0.0212885	1.14242		-0.382823	0.0943592	2.51256	0.398	0.0211683		0.000226369	0.000510992	0.0214238	1.04742		0.225217	-0.225217	2.41293	0.414433	0.0271343		3.76343e-06	0.000646055	0.0274573	0.0137732
						0.000518866	0.382366	2.61349	0.382631	0.019655		0.000806048	0.000457935	0.0198839	4.16175		-0.0892349	0.382366	2.51777	0.397176	0.0215413		0.000244403	0.000505831	0.0217942	1.1424		-0.382366	0.0945881	2.51114	0.398226	0.0216793		0.000226472	0.000511233	0.0219349	1.04741		0.225674	-0.225674	2.41291	0.414437	0.0277803		3.76343e-06	0.000646055	0.0281034	0.0137732
						0.000550672	0.38191	2.60799	0.383437	0.0201129		0.000543343	0.000458035	0.0203419	2.80475		-0.0894521	0.38191	2.51623	0.397421	0.0220471		0.000227626	0.000505987	0.0223001	1.06366		-0.38191	0.0948176	2.50971	0.398453	0.0221906		0.000211327	0.000511484	0.0224463	0.976882		0.226131	-0.226131	2.41289	0.414441	0.0284264		4.75296e-06	0.000646055	0.0287494	0.0173946
						0.000583885	0.381453	2.6043	0.38398	0.020571		0.000548264	0.00045809	0.0208	2.82981		-0.0896697	0.381453	2.51479	0.397648	0.0225531		0.0002154	0.000506083	0.0228062	1.00634		-0.381453	0.0950477	2.50838	0.398664	0.022702		0.000190411	0.000511634	0.0229579	0.879938		0.226587	-0.226587	2.41286	0.414446	0.0290725		4.75296e-06	0.000646055	0.0293955	0.0173946
						0.000617841	0.380996	2.60059	0.384528	0.021029		0.000550424	0.000458149	0.0212581	2.8406		-0.0898875	0.380996	2.51342	0.397864	0.0230592		0.00020398	0.00050618	0.0233123	0.9528		-0.380996	0.095278	2.50718	0.398854	0.0232137		0.000191209	0.000511788	0.0234696	0.883359		0.227044	-0.227044	2.41283	0.414451	0.0297185		4.75296e-06	0.000646055	0.0300415	0.0173946
						0.000652579	0.380539	2.59687	0.385079	0.0214872		0.000550517	0.000458212	0.0217163	2.84069		-0.0901055	0.380539	2.51214	0.398068	0.0235654		0.000204017	0.000506277	0.0238185	0.95279		-0.380539	0.0955088	2.50598	0.399045	0.0237255		0.000195993	0.00051194	0.0239814	0.905193		0.227501	-0.227501	2.41281	0.414455	0.0303646		4.75296e-06	0.000646055	0.0306876	0.0173946
						0.000688144	0.380082	2.59316	0.385629	0.0219454		0.000550615	0.00045828	0.0221745	2.84077		-0.0903237	0.380082	2.51085	0.398272	0.0240716		0.000206491	0.000506376	0.0243248	0.964156		-0.380082	0.0957398	2.50475	0.399241	0.0242374		0.000196039	0.000512053	0.0244934	0.905204		0.227958	-0.227958	2.41278	0.41446	0.0310106		4.75296e-06	0.000646055	0.0313336	0.0173946
						0.00072458	0.379625	2.58947	0.38618	0.0224037		0.000550719	0.000458355	0.0226329	2.84084		-0.0905421	0.379625	2.50955	0.398478	0.024578		0.000210012	0.000506457	0.0248313	0.98044		-0.379625	0.0959711	2.50352	0.399437	0.0247495		0.000196086	0.000512169	0.0250055	0.905216		0.228415	-0.228415	2.41275	0.414465	0.0316567		4.75296e-06	0.000646055	0.0319797	0.0173946
						0.00076194	0.379169	2.58578	0.386731	0.022862		0.000550829	0.000458436	0.0230913	2.84091		-0.0907608	0.379169	2.50823	0.398688	0.0250845		0.000210036	0.000506511	0.0253377	0.980447		-0.379169	0.0962027	2.50229	0.399634	0.0252616		0.000196134	0.000512288	0.0255178	0.905227		0.228872	-0.228872	2.41272	0.41447	0.0323027		4.75296e-06	0.000646055	0.0326258	0.0173946
						0.000800279	0.378712	2.5821	0.387281	0.0233205		0.000550946	0.000458524	0.0235497	2.84097		-0.0909796	0.378712	2.50691	0.398898	0.025591		0.00021006	0.000506566	0.0258443	0.980454		-0.378712	0.0964345	2.50106	0.39983	0.0257739		0.000196183	0.000512411	0.0260301	0.905239		0.229328	-0.229328	2.41269	0.414474	0.0329488		4.75296e-06	0.000646055	0.0332718	0.0173946
						0.000839658	0.378255	2.57843	0.387832	0.023779		0.000551071	0.00045862	0.0240083	2.84101		-0.0911985	0.378255	2.50559	0.399108	0.0260976		0.000208446	0.000506621	0.0263509	0.972814		-0.378255	0.0966666	2.49984	0.400026	0.0262863		0.000181657	0.000512537	0.0265426	0.838003		0.229785	-0.229785	2.41267	0.414479	0.0335948		4.75296e-06	0.000646055	0.0339179	0.0173946
						0.000880146	0.377798	2.57477	0.388384	0.0242376		0.000551204	0.000458726	0.024467	2.84104		-0.0914175	0.377798	2.50428	0.399317	0.0266042		0.000188625	0.000506677	0.0268575	0.880213		-0.377798	0.096899	2.4987	0.400208	0.0267989		0.0001765	0.000512666	0.0270552	0.814008		0.230242	-0.230242	2.41264	0.414484	0.0342409		4.75296e-06	0.000646055	0.0345639	0.0173946
						0.000921817	0.377341	2.57113	0.388935	0.0246963		0.000551346	0.000458843	0.0249258	2.84105		-0.0916366	0.377341	2.5031	0.399505	0.0271109		0.000188646	0.000506734	0.0273642	0.880212		-0.377341	0.0971317	2.4976	0.400384	0.0273115		0.000176545	0.0005128	0.0275679	0.814005		0.230699	-0.230699	2.41261	0.414489	0.0348869		4.75296e-06	0.000646055	0.03521	0.0173946
						0.000964755	0.376884	2.56749	0.389486	0.0251552		0.000397529	0.000458972	0.0253847	2.04787		-0.0918559	0.376884	2.50191	0.399694	0.0276176		0.000178296	0.000506791	0.027871	0.831826		-0.376884	0.0973647	2.4965	0.400561	0.0278243		0.000167739	0.000512937	0.0280808	0.773195		0.231156	-0.231156	2.41258	0.414493	0.035533		5.75543e-06	0.000646055	0.035856	0.0210634
						0.00100905	0.376428	2.56487	0.389884	0.0256142		0.000397623	0.000459053	0.0258437	2.04799		-0.0920753	0.376428	2.5008	0.399872	0.0281244		0.000178315	0.000506843	0.0283778	0.83183		-0.376428	0.0975979	2.49546	0.400728	0.0283373		0.000167775	0.000513042	0.0285938	0.773201		0.231613	-0.231613	2.41255	0.414499	0.0361791		5.75543e-06	0.000646055	0.0365021	0.0210634
						0.00105418	0.375971	2.56225	0.390281	0.0260732		0.000401122	0.000459139	0.0263028	2.06562		-0.0922949	0.375971	2.49968	0.400051	0.0286312		0.000178335	0.000506895	0.0288847	0.831834		-0.375971	0.0978314	2.49441	0.400896	0.0288503		0.000167811	0.00051315	0.0291069	0.773206		0.232069	-0.232069	2.41252	0.414505	0.0368251		5.75543e-06	0.000646055	0.0371481	0.0210634
						0.00110018	0.375514	2.55962	0.390682	0.0265323		0.00040298	0.000459231	0.026762	2.07478		-0.0925145	0.375514	2.49857	0.400229	0.0291381		0.000178353	0.000506947	0.0293916	0.831837		-0.375514	0.0980651	2.49337	0.401064	0.0293635		0.000167848	0.000513258	0.0296201	0.773212		0.232526	-0.232526	2.41248	0.414511	0.0374712		5.75543e-06	0.000646055	0.0377942	0.0210634
						0.00114708	0.375057	2.55699	0.391085	0.0269916		0.000403075	0.000459329	0.0272212	2.07483		-0.0927343	0.375057	2.49746	0.400407	0.0296451		0.000178372	0.000506998	0.0298986	0.831841		-0.375057	0.0982991	2.49233	0.401232	0.0298767		0.000160569	0.000513369	0.0301334	0.739521		0.232983	-0.232983	2.41245	0.414516	0.0381172		5.75543e-06	0.000646055	0.0384402	0.0210634
						0.00119493	0.3746	2.55435	0.391488	0.0274509		0.000403174	0.000459433	0.0276806	2.07486		-0.0929542	0.3746	2.49635	0.400586	0.0301521		0.000167282	0.000507048	0.0304056	0.780044		-0.3746	0.0985333	2.49133	0.401392	0.0303901		0.000151864	0.000513481	0.0306468	0.699279		0.23344	-0.23344	2.41242	0.414522	0.0387633		5.75543e-06	0.000646055	0.0390863	0.0210634
						0.00124377	0.374143	2.55173	0.391892	0.0279103		0.000403278	0.000459545	0.0281401	2.07489		-0.0931742	0.374143	2.4953	0.400753	0.0306591		0.000161232	0.000507098	0.0309127	0.751759		-0.374143	0.0987678	2.49039	0.401544	0.0309036		0.000151897	0.000513594	0.0311604	0.699274		0.233897	-0.233897	2.41238	0.414528	0.0394093		5.75543e-06	0.000646055	0.0397324	0.0210634
						0.00129365	0.373687	2.5491	0.392295	0.0283699		0.000403388	0.000459665	0.0285997	2.07492		-0.0933943	0.373687	2.4943	0.400914	0.0311662		0.000161247	0.000507147	0.0314198	0.751757		-0.373687	0.0990025	2.48944	0.401696	0.0314172		0.00015193	0.000513709	0.031674	0.699269		0.234354	-0.234354	2.41235	0.414534	0.0400554		5.75543e-06	0.000646055	0.0403784	0.0210634
						0.00134463	0.37323	2.54648	0.392698	0.0288296		0.000403503	0.000459794	0.0290594	2.07492		-0.0936146	0.37323	2.4933	0.401075	0.0316734		0.000161262	0.000507196	0.031927	0.751754		-0.37323	0.0992374	2.4885	0.401848	0.0319309		0.000151963	0.000513826	0.0321878	0.699264		0.23481	-0.23481	2.41232	0.414539	0.0407014		5.75543e-06	0.000646055	0.0410245	0.0210634
						0.00139676	0.372773	2.54387	0.393102	0.0292893		0.000403624	0.000459933	0.0295193	2.07492		-0.0938349	0.372773	2.49229	0.401237	0.0321806		0.000161277	0.000507243	0.0324342	0.751752		-0.372773	0.0994726	2.48756	0.402	0.0324447		0.000151997	0.000513945	0.0327017	0.699258		0.235267	-0.235267	2.41228	0.414545	0.0413475		5.75543e-06	0.000646055	0.0416705	0.0210634
						0.0014501	0.372316	2.54126	0.393505	0.0297493		0.000403752	0.000460084	0.0299793	2.0749		-0.0940554	0.372316	2.49129	0.401398	0.0326878		0.000161291	0.00050729	0.0329414	0.75175		-0.372316	0.0997081	2.48662	0.402152	0.0329586		0.000152031	0.000514066	0.0332157	0.699252		0.235724	-0.235724	2.41225	0.414551	0.0419936		5.75543e-06	0.000646055	0.0423166	0.0210634
						0.00150472	0.371859	2.53866	0.393909	0.0302094		0.000304701	0.000460246	0.0304395	1.56532		-0.094276	0.371859	2.49029	0.401559	0.0331951		0.000153354	0.000507335	0.0334488	0.714695		-0.371859	0.0999438	2.48568	0.402304	0.0334727		0.000142781	0.000514188	0.0337298	0.656548		0.236181	-0.236181	2.41222	0.414557	0.0426396		6.7644e-06	0.000646055	0.0429626	0.0247559
						0.0015607	0.371402	2.53669	0.394214	0.0306696		0.000304792	0.000460358	0.0308998	1.56541		-0.0944966	0.371402	2.48934	0.401713	0.0337024		0.000150215	0.000507401	0.0339561	0.699972		-0.371402	0.10018	2.4848	0.402447	0.0339869		0.000132165	0.000514312	0.0342441	0.607588		0.236638	-0.236638	2.41218	0.414563	0.0432857		6.7644e-06	0.000646055	0.0436087	0.0247559
						0.00161758	0.370946	2.53473	0.394519	0.03113		0.000304886	0.000460475	0.0313602	1.56549		-0.0947174	0.370946	2.48841	0.401863	0.0342098		0.000139461	0.000507466	0.0344636	0.64978		-0.370946	0.100416	2.48398	0.402579	0.0345012		0.000134578	0.000514437	0.0347584	0.618532		0.237095	-0.237095	2.41214	0.41457	0.0439317		6.7644e-06	0.000646055	0.0442547	0.0247559
						0.00167541	0.370489	2.53278	0.394823	0.0315904		0.000305915	0.000460599	0.0318207	1.57035		-0.0949384	0.370489	2.48755	0.402002	0.0347173		0.000139478	0.00050753	0.0349711	0.649776		-0.370489	0.100653	2.48315	0.402714	0.0350156		0.000135976	0.000514534	0.0352729	0.62484		0.237551	-0.237551	2.4121	0.414577	0.0445778		6.7644e-06	0.000646055	0.0449008	0.0247559
						0.00173422	0.370032	2.53082	0.395129	0.032051		0.000309056	0.00046073	0.0322814	1.58603		-0.0951595	0.370032	2.48669	0.402142	0.0352248		0.000139495	0.000507593	0.0354786	0.649771		-0.370032	0.100889	2.48232	0.40285	0.0355302		0.000135999	0.000514615	0.0357875	0.624845		0.238008	-0.238008	2.41206	0.414584	0.0452238		6.7644e-06	0.000646055	0.0455469	0.0247559
						0.00179404	0.369575	2.52884	0.395438	0.0325118		0.000309151	0.000460868	0.0327422	1.58604		-0.0953808	0.369575	2.48582	0.402281	0.0357324		0.000141719	0.000507655	0.0359862	0.660053		-0.369575	0.101126	2.48148	0.402986	0.0360448		0.000136021	0.000514696	0.0363021	0.62485		0.238465	-0.238465	2.41202	0.41459	0.0458699		6.7644e-06	0.000646055	0.0461929	0.0247559
						0.00185492	0.369118	2.52686	0.395748	0.0329726		0.00030925	0.000461015	0.0332031	1.58604		-0.0956022	0.369118	2.48495	0.402423	0.0362401		0.00014344	0.000507693	0.0364939	0.668016		-0.369118	0.101363	2.48064	0.403122	0.0365595		0.000136044	0.000514778	0.0368169	0.624854		0.238922	-0.238922	2.41198	0.414597	0.0465159		6.7644e-06	0.000646055	0.046839	0.0247559
						0.0019169	0.368661	2.52489	0.396057	0.0334337		0.000309353	0.00046117	0.0336642	1.58603		-0.0958237	0.368661	2.48406	0.402566	0.0367478		0.000143445	0.000507711	0.0370016	0.668018		-0.368661	0.101601	2.4798	0.403258	0.0370743		0.000136067	0.00051486	0.0373317	0.624859		0.239379	-0.239379	2.41194	0.414604	0.047162		6.7644e-06	0.000646055	0.047485	0.0247559
						0.00198002	0.368205	2.52292	0.396366	0.0338948		0.000309461	0.000461336	0.0341255	1.58602		-0.0960452	0.368205	2.48318	0.40271	0.0372555		0.00014345	0.000507728	0.0375093	0.668019		-0.368205	0.101838	2.47897	0.403394	0.0375891		0.000124462	0.000514943	0.0378466	0.571475		0.239836	-0.239836	2.4119	0.414611	0.047808		6.7644e-06	0.000646055	0.0481311	0.0247559
						0.00204434	0.367748	2.52095	0.396676	0.0343562		0.000309573	0.000461512	0.0345869	1.58599		-0.0962668	0.367748	2.48229	0.402853	0.0377632		0.000132894	0.000507744	0.0380171	0.618843		-0.367748	0.102076	2.4782	0.403518	0.0381041		0.000123868	0.000515026	0.0383616	0.568656		0.240292	-0.240292	2.41186	0.414617	0.0484541		6.7644e-06	0.000646055	0.0487771	0.0247559
						0.00210992	0.367291	2.51899	0.396985	0.0348177		0.000309691	0.000461699	0.0350485	1.58595		-0.0964884	0.367291	2.48147	0.402986	0.0382709		0.00013053	0.000507757	0.0385248	0.607818		-0.367291	0.102314	2.47744	0.403642	0.0386191		0.000123888	0.00051511	0.0388767	0.568655		0.240749	-0.240749	2.41182	0.414624	0.0491002		6.7644e-06	0.000646055	0.0494232	0.0247559
						0.0021768	0.366834	2.51702	0.397295	0.0352794		0.000241655	0.000461899	0.0355103	1.23699		-0.0967101	0.366834	2.48067	0.403117	0.0387787		0.000125178	0.000507769	0.0390326	0.582881		-0.366834	0.102552	2.47668	0.403766	0.0391342		0.000119386	0.000515194	0.0393918	0.547898		0.241206	-0.241206	2.41178	0.414631	0.0497462		7.77327e-06	0.000646055	0.0500692	0.0284481
						0.00224504	0.366377	2.51549	0.397537	0.0357413		0.000241743	0.000462045	0.0359723	1.23706		-0.0969317	0.366377	2.4799	0.403242	0.0392865		0.000125189	0.000507812	0.0395404	0.582883		-0.366377	0.10279	2.47595	0.403885	0.0396494		0.00011941	0.000515297	0.039907	0.547901		0.241663	-0.241663	2.41174	0.414639	0.0503923		7.77327e-06	0.000646055	0.0507153	0.0284481
						0.00231427	0.365921	2.51396	0.397778	0.0362033		0.000241835	0.000462198	0.0364344	1.23711		-0.0971535	0.365921	2.47913	0.403367	0.0397943		0.0001252	0.000507855	0.0400482	0.582885		-0.365921	0.103028	2.47522	0.404005	0.0401647		0.000119435	0.0005154	0.0404224	0.547904		0.24212	-0.24212	2.41169	0.414647	0.0510383		7.77327e-06	0.000646055	0.0513613	0.0284481
						0.00238452	0.365464	2.51244	0.39802	0.0366655		0.000241929	0.000462359	0.0368967	1.23716		-0.0973753	0.365464	2.47836	0.403492	0.0403021		0.00012521	0.000507896	0.0405561	0.582887		-0.365464	0.103267	2.47449	0.404124	0.0406801		0.000119459	0.000515504	0.0409378	0.547907		0.242577	-0.242577	2.41165	0.414654	0.0516844		7.77327e-06	0.000646055	0.0520074	0.0284481
						0.00245581	0.365007	2.51091	0.398262	0.0371279		0.000242026	0.000462527	0.0373591	1.23721		-0.0975973	0.365007	2.47759	0.403617	0.04081		0.000125221	0.000507936	0.041064	0.582889		-0.365007	0.103506	2.47376	0.404244	0.0411956		0.000112079	0.000515607	0.0414534	0.513952		0.243033	-0.243033	2.4116	0.414662	0.0523304		7.77327e-06	0.000646055	0.0526535	0.0284481
						0.00252818	0.36455	2.50938	0.398504	0.0375904		0.000243262	0.000462704	0.0378218	1.24306		-0.0978194	0.36455	2.47682	0.403743	0.041318		0.000120806	0.000507975	0.041572	0.562297		-0.36455	0.103745	2.47307	0.404356	0.0417112		0.000109225	0.000515712	0.0419691	0.500767		0.24349	-0.24349	2.41156	0.41467	0.0529765		7.77327e-06	0.000646055	0.0532995	0.0284481
						0.00260167	0.364093	2.50785	0.398747	0.0380531		0.000245345	0.000462889	0.0382845	1.2532		-0.0980415	0.364093	2.47608	0.403864	0.0418259		0.000114508	0.000508011	0.04208	0.532944		-0.364093	0.103984	2.4724	0.404465	0.0422269		0.000109247	0.000515816	0.0424848	0.500764		0.243947	-0.243947	2.41151	0.414678	0.0536225		7.77327e-06	0.000646055	0.0539456	0.0284481
						0.00267633	0.363636	2.50631	0.398993	0.038516		0.000245443	0.000463084	0.0387475	1.25317		-0.0982637	0.363636	2.47538	0.403978	0.042334		0.000114516	0.000508047	0.042588	0.532943		-0.363636	0.104224	2.47174	0.404574	0.0427427		0.000109268	0.000515921	0.0430007	0.500761		0.244404	-0.244404	2.41147	0.414685	0.0542686		7.77327e-06	0.000646055	0.0545916	0.0284481
						0.00275218	0.36318	2.50477	0.399238	0.0389791		0.000245545	0.00046329	0.0392107	1.25313		-0.098486	0.36318	2.47468	0.404093	0.042842		0.000114523	0.00050808	0.043096	0.532942		-0.36318	0.104463	2.47107	0.404683	0.0432587		0.00010929	0.000516026	0.0435167	0.500757		0.244861	-0.244861	2.41142	0.414693	0.0549146		7.77327e-06	0.000646055	0.0552377	0.0284481
						0.00282928	0.362723	2.50323	0.399484	0.0394424		0.000245651	0.000463507	0.0396741	1.25309		-0.0987084	0.362723	2.47398	0.404207	0.0433501		0.00011453	0.000508112	0.0436041	0.532941		-0.362723	0.104703	2.4704	0.404793	0.0437747		0.000109311	0.000516131	0.0440327	0.500754		0.245317	-0.245317	2.41138	0.414701	0.0555607		7.77327e-06	0.000646055	0.0558837	0.0284481
						0.00290767	0.362266	2.50169	0.399729	0.0399059		0.000245761	0.000463736	0.0401377	1.25303		-0.0989308	0.362266	2.47328	0.404322	0.0438582		0.000114537	0.000508141	0.0441123	0.532941		-0.362266	0.104944	2.46973	0.404902	0.0442908		0.000109333	0.000516236	0.0445489	0.50075		0.245774	-0.245774	2.41133	0.414709	0.0562068		7.77327e-06	0.000646055	0.0565298	0.0284481
						0.00298741	0.361809	2.50016	0.399975	0.0403696		0.000196768	0.000463979	0.0406016	1.00271		-0.0991534	0.361809	2.47258	0.404436	0.0443663		0.000110137	0.000508169	0.0446204	0.512442		-0.361809	0.105184	2.46907	0.405011	0.044807		0.000101235	0.000516342	0.0450652	0.463567		0.246231	-0.246231	2.41129	0.414717	0.0568528		8.77529e-06	0.000646055	0.0571758	0.0321153
						0.00306855	0.361352	2.49893	0.400172	0.0408336		0.000196854	0.000464165	0.0410657	1.00275		-0.0993759	0.361352	2.47191	0.404546	0.0448745		0.000110022	0.000508235	0.0451286	0.511838		-0.361352	0.105425	2.46845	0.405113	0.0453234		9.85441e-05	0.000516475	0.0455816	0.451129		0.246688	-0.246688	2.41123	0.414725	0.0574989		8.77529e-06	0.000646055	0.0578219	0.0321153
						0.00315074	0.360895	2.4977	0.400369	0.0412978		0.000196943	0.000464358	0.0415299	1.00278		-0.0995987	0.360895	2.47123	0.404656	0.0453827		0.000101172	0.000508299	0.0456369	0.47061		-0.360895	0.105666	2.46785	0.405211	0.0458399		9.97428e-05	0.000516584	0.0460982	0.45652		0.247145	-0.247145	2.41118	0.414734	0.0581449		8.77529e-06	0.000646055	0.0584679	0.0321153
						0.00323402	0.360439	2.49647	0.400566	0.0417621		0.000197035	0.00046456	0.0419944	1.00281		-0.0998216	0.360439	2.47062	0.404757	0.045891		0.000101184	0.000508362	0.0461452	0.470607		-0.360439	0.105907	2.46724	0.405311	0.0463564		9.97611e-05	0.000516674	0.0466148	0.456524		0.247602	-0.247602	2.41113	0.414743	0.058791		8.77529e-06	0.000646055	0.059114	0.0321153
						0.00331841	0.359982	2.49524	0.400763	0.0422267		0.000197129	0.00046477	0.0424591	1.00284		-0.100045	0.359982	2.47	0.404859	0.0463994		0.000101196	0.000508423	0.0466536	0.470604		-0.359982	0.106148	2.46664	0.405411	0.0468731		9.97794e-05	0.000516765	0.0471315	0.456527		0.248058	-0.248058	2.41108	0.414752	0.059437		8.77529e-06	0.000646055	0.0597601	0.0321153
						0.00340396	0.359525	2.49402	0.40096	0.0426914		0.000197226	0.00046499	0.0429239	1.00286		-0.100268	0.359525	2.46938	0.40496	0.0469078		0.000101207	0.000508483	0.0471621	0.470601		-0.359525	0.10639	2.46603	0.40551	0.0473899		9.97976e-05	0.000516856	0.0476483	0.456531		0.248515	-0.248515	2.41103	0.41476	0.0600831		8.77529e-06	0.000646055	0.0604061	0.0321153
						0.00349069	0.359068	2.49279	0.401157	0.0431564		0.000197325	0.000465219	0.043389	1.00287		-0.100491	0.359068	2.46876	0.405061	0.0474163		0.000103869	0.000508542	0.0476706	0.482923		-0.359068	0.106631	2.46542	0.40561	0.0479067		9.98159e-05	0.000516947	0.0481652	0.456534		0.248972	-0.248972	2.41098	0.414769	0.0607291		8.77529e-06	0.000646055	0.0610522	0.0321153
						0.00357864	0.358611	2.49156	0.401354	0.0436217		0.000197429	0.000465459	0.0438544	1.00288		-0.100714	0.358611	2.46813	0.405165	0.0479248		0.000104017	0.000508564	0.0481791	0.483592		-0.358611	0.106873	2.46481	0.40571	0.0484237		9.72796e-05	0.000517037	0.0486822	0.444856		0.249429	-0.249429	2.41093	0.414778	0.0613752		8.77529e-06	0.000646055	0.0616982	0.0321153
						0.00366785	0.358154	2.49034	0.401552	0.0440871		0.000199928	0.000465711	0.04432	1.01503		-0.100938	0.358154	2.4675	0.405269	0.0484334		0.000104021	0.000508582	0.0486877	0.483593		-0.358154	0.107116	2.46422	0.405807	0.0489407		9.16377e-05	0.000517128	0.0491993	0.418982		0.249886	-0.249886	2.41088	0.414787	0.0620212		8.77529e-06	0.000646055	0.0623443	0.0321153
						0.00375837	0.357698	2.4891	0.401752	0.0445528		0.000200119	0.000465974	0.0447858	1.01542		-0.101161	0.357698	2.46686	0.405373	0.048942		9.87099e-05	0.000508598	0.0491963	0.458887		-0.357698	0.107358	2.46367	0.405899	0.0494579		9.16536e-05	0.000517218	0.0497165	0.418981		0.250343	-0.250343	2.41083	0.414795	0.0626673		8.77529e-06	0.000646055	0.0629903	0.0321153
						0.00385023	0.357241	2.48786	0.401952	0.0450188		0.000200223	0.000466251	0.0452519	1.01535		-0.101385	0.357241	2.46626	0.405472	0.0494506		9.55324e-05	0.000508612	0.0497049	0.444103		-0.357241	0.1076	2.46311	0.405991	0.0499751		9.16694e-05	0.000517309	0.0502337	0.418981		0.250799	-0.250799	2.41078	0.414804	0.0633134		8.77529e-06	0.000646055	0.0636364	0.0321153
						0.00394349	0.356784	2.48662	0.402152	0.045485		0.000163638	0.000466541	0.0457183	0.829303		-0.101609	0.356784	2.46568	0.405567	0.0499592		9.2422e-05	0.000508624	0.0502135	0.429633		-0.356784	0.107843	2.46256	0.406082	0.0504924		8.90828e-05	0.000517399	0.0507511	0.407087		0.251256	-0.251256	2.41072	0.414813	0.0639594		9.76373e-06	0.000646055	0.0642824	0.0357327
						0.00403818	0.356327	2.48561	0.402316	0.0459516		0.000163723	0.000466772	0.046185	0.829322		-0.101832	0.356327	2.46512	0.40566	0.0504678		9.24318e-05	0.000508676	0.0507222	0.429635		-0.356327	0.108086	2.46202	0.406171	0.0510098		8.91043e-05	0.000517521	0.0512685	0.407089		0.251713	-0.251713	2.41067	0.414823	0.0646055		9.76373e-06	0.000646055	0.0649285	0.0357327
						0.00413401	0.35587	2.4846	0.402479	0.0464184		0.00016381	0.000467011	0.0466519	0.829337		-0.102056	0.35587	2.46456	0.405752	0.0509765		9.24413e-05	0.000508727	0.0512309	0.429636		-0.35587	0.108329	2.46148	0.40626	0.0515273		8.91258e-05	0.000517644	0.0517861	0.407091		0.25217	-0.25217	2.41061	0.414833	0.0652515		9.76373e-06	0.000646055	0.0655745	0.0357327
						0.004231	0.355413	2.48359	0.402643	0.0468854		0.000163899	0.00046726	0.047119	0.829348		-0.10228	0.355413	2.464	0.405844	0.0514852		9.24506e-05	0.000508776	0.0517396	0.429638		-0.355413	0.108573	2.46094	0.40635	0.0520449		8.82301e-05	0.000517767	0.0523038	0.402904		0.252627	-0.252627	2.41055	0.414842	0.0658976		9.76373e-06	0.000646055	0.0662206	0.0357327
						0.00432917	0.354957	2.48258	0.402807	0.0473526		0.000163991	0.000467519	0.0475864	0.829353		-0.102504	0.354957	2.46344	0.405937	0.051994		9.24597e-05	0.000508824	0.0522484	0.429639		-0.354957	0.108816	2.4604	0.406438	0.0525627		8.20995e-05	0.000517891	0.0528217	0.374819		0.253084	-0.253084	2.4105	0.414852	0.0665436		9.76373e-06	0.000646055	0.0668667	0.0357327
						0.00442857	0.3545	2.48157	0.402971	0.0478201		0.000164085	0.000467787	0.048054	0.829353		-0.102728	0.3545	2.46288	0.406029	0.0525028		9.07101e-05	0.000508871	0.0527573	0.42147		-0.3545	0.10906	2.4599	0.40652	0.0530806		8.21184e-05	0.000518014	0.0533396	0.374816		0.25354	-0.25354	2.41044	0.414862	0.0671897		9.76373e-06	0.000646055	0.0675127	0.0357327
						0.00452923	0.354043	2.48056	0.403135	0.0482879		0.000164182	0.000468067	0.048522	0.829346		-0.102952	0.354043	2.46233	0.40612	0.0530117		8.52351e-05	0.000508916	0.0532662	0.395997		-0.354043	0.109305	2.45941	0.406602	0.0535986		8.21374e-05	0.000518138	0.0538577	0.374813		0.253997	-0.253997	2.41038	0.414872	0.0678357		9.76373e-06	0.000646055	0.0681588	0.0357327
						0.00463118	0.353586	2.47955	0.403299	0.048756		0.000164281	0.000468358	0.0489902	0.829334		-0.103176	0.353586	2.46181	0.406205	0.0535206		8.52422e-05	0.000508959	0.0537751	0.395996		-0.353586	0.109549	2.45891	0.406684	0.0541168		8.21564e-05	0.000518262	0.0543759	0.37481		0.254454	-0.254454	2.41033	0.414881	0.0684818		9.76373e-06	0.000646055	0.0688048	0.0357327
						0.00473445	0.353129	2.47854	0.403464	0.0492244		0.000164384	0.000468661	0.0494587	0.829314		-0.103401	0.353129	2.46129	0.406291	0.0540296		8.52489e-05	0.000509	0.0542841	0.395995		-0.353129	0.109794	2.45841	0.406766	0.054635		8.21754e-05	0.000518386	0.0548942	0.374807		0.254911	-0.254911	2.41027	0.414891	0.0691278		9.76373e-06	0.000646055	0.0694509	0.0357327
						0.0048391	0.352672	2.47753	0.403628	0.049693		0.000164489	0.000468978	0.0499275	0.829287		-0.103625	0.352672	2.46078	0.406376	0.0545386		8.52554e-05	0.00050904	0.0547931	0.395995		-0.352672	0.110039	2.45792	0.406848	0.0551534		8.21944e-05	0.00051851	0.0554127	0.374804		0.255368	-0.255368	2.41021	0.414901	0.0697739		9.76373e-06	0.000646055	0.0700969	0.0357327
						0.00494515	0.352216	2.47652	0.403793	0.050162		0.000164757	0.000469308	0.0503967	0.830052		-0.10385	0.352216	2.46026	0.406461	0.0550476		8.52616e-05	0.000509078	0.0553022	0.395994		-0.352216	0.110284	2.45742	0.406931	0.0556719		8.22133e-05	0.000518634	0.0559312	0.374801		0.255825	-0.255825	2.41016	0.414911	0.07042		9.76373e-06	0.000646055	0.070743	0.0357327
						0.00505265	0.351759	2.47551	0.403957	0.0506313		0.000138797	0.000469653	0.0508661	0.69875		-0.104074	0.351759	2.45974	0.406546	0.0555567		8.25961e-05	0.000509113	0.0558113	0.383587		-0.351759	0.11053	2.45692	0.407013	0.0561906		7.60086e-05	0.000518758	0.0564499	0.346431		0.256281	-0.256281	2.4101	0.41492	0.071066		1.07319e-05	0.000646055	0.071389	0.0392759
						0.00516165	0.351302	2.47466	0.404096	0.051101		0.000139075	0.000469935	0.0513359	0.699733		-0.104299	0.351302	2.45924	0.406629	0.0560658		8.26086e-05	0.00050919	0.0563204	0.383588		-0.351302	0.110775	2.45647	0.407089	0.0567093		7.60255e-05	0.00051888	0.0569687	0.346427		0.256738	-0.256738	2.41004	0.414931	0.0717121		1.07319e-05	0.000646055	0.0720351	0.0392759
						0.00527185	0.350845	2.47381	0.404235	0.0515709		0.000139167	0.000470227	0.051806	0.699758		-0.104524	0.350845	2.45874	0.406712	0.056575		7.72252e-05	0.000509265	0.0568296	0.358537		-0.350845	0.111021	2.45601	0.407165	0.0572282		7.60435e-05	0.000518998	0.0574877	0.34643		0.257195	-0.257195	2.40998	0.414942	0.0723581		1.07319e-05	0.000646055	0.0726811	0.0392759
						0.0053833	0.350388	2.47296	0.404374	0.0520411		0.000139261	0.000470529	0.0522764	0.69978		-0.104749	0.350388	2.45828	0.406789	0.0570843		7.64157e-05	0.000509339	0.0573389	0.354727		-0.350388	0.111268	2.45555	0.407241	0.0577472		7.60616e-05	0.000519117	0.0580067	0.346433		0.257652	-0.257652	2.40991	0.414953	0.0730042		1.07319e-05	0.000646055	0.0733272	0.0392759
						0.00549601	0.349931	2.4721	0.404514	0.0525117		0.000139357	0.000470842	0.0527471	0.699797		-0.104974	0.349931	2.45782	0.406865	0.0575936		7.64261e-05	0.000509412	0.0578483	0.354725		-0.349931	0.111514	2.45509	0.407317	0.0582663		7.60796e-05	0.000519236	0.0585259	0.346436		0.258109	-0.258109	2.40985	0.414963	0.0736502		1.07319e-05	0.000646055	0.0739733	0.0392759
						0.00561002	0.349475	2.47125	0.404653	0.0529825		0.000139455	0.000471166	0.0532181	0.699809		-0.1052	0.349475	2.45735	0.406942	0.058103		7.64362e-05	0.000509484	0.0583578	0.354722		-0.349475	0.111761	2.45463	0.407393	0.0587855		7.60977e-05	0.000519354	0.0590452	0.346439		0.258566	-0.258566	2.40979	0.414974	0.0742963		1.07319e-05	0.000646055	0.0746193	0.0392759
						0.00572536	0.349018	2.4704	0.404792	0.0534537		0.000139556	0.000471502	0.0536894	0.699816		-0.105425	0.349018	2.45689	0.407018	0.0586125		7.75982e-05	0.000509554	0.0588673	0.360065		-0.349018	0.112008	2.45417	0.407469	0.0593049		7.61158e-05	0.000519473	0.0595646	0.346442		0.259022	-0.259022	2.40973	0.414985	0.0749423		1.07319e-05	0.000646055	0.0752654	0.0392759
						0.00584207	0.348561	2.46955	0.404932	0.0539252		0.000139659	0.000471851	0.0541611	0.699817		-0.105651	0.348561	2.45643	0.407096	0.0591221		7.85618e-05	0.000509604	0.0593769	0.3645		-0.348561	0.112255	2.45371	0.407545	0.0598244		7.13174e-05	0.000519593	0.0600842	0.324528		0.259479	-0.259479	2.40966	0.414996	0.0755884		1.07319e-05	0.000646055	0.0759114	0.0392759
						0.00596018	0.348104	2.4687	0.405072	0.054397		0.000139766	0.000472213	0.0546331	0.699813		-0.105877	0.348104	2.45595	0.407174	0.0596317		7.85671e-05	0.000509637	0.0598865	0.364502		-0.348104	0.112503	2.45329	0.407617	0.060344		7.02984e-05	0.000519712	0.0606038	0.319817		0.259936	-0.259936	2.4096	0.415006	0.0762344		1.07319e-05	0.000646055	0.0765575	0.0392759
						0.00607973	0.347647	2.46785	0.405211	0.0548692		0.000139875	0.00047259	0.0551055	0.699802		-0.106103	0.347647	2.45548	0.407253	0.0601413		7.55718e-05	0.000509668	0.0603961	0.350584		-0.347647	0.112751	2.45286	0.407687	0.0608637		7.03144e-05	0.000519831	0.0611236	0.319817		0.260393	-0.260393	2.40954	0.415017	0.0768805		1.07319e-05	0.000646055	0.0772035	0.0392759
						0.00620076	0.34719	2.467	0.405351	0.0553418		0.000139987	0.000472981	0.0555783	0.699784		-0.106329	0.34719	2.45502	0.407328	0.060651		7.26259e-05	0.000509697	0.0609058	0.336898		-0.34719	0.112999	2.45244	0.407757	0.0613835		7.03304e-05	0.000519951	0.0616435	0.319816		0.26085	-0.26085	2.40948	0.415028	0.0775266		1.07319e-05	0.000646055	0.0778496	0.0392759
						0.00632331	0.346734	2.46614	0.405491	0.0558148		0.000117474	0.000473388	0.0560515	0.586736		-0.106555	0.346734	2.45458	0.407401	0.0611607		7.06906e-05	0.000509724	0.0614155	0.327903		-0.346734	0.113247	2.45202	0.407828	0.0619035		6.87438e-05	0.00052007	0.0621635	0.312529		0.261307	-0.261307	2.40942	0.415038	0.0781726		1.16732e-05	0.000646055	0.0784956	0.042721
						0.00644742	0.346277	2.46543	0.405609	0.0562882		0.00011757	0.00047373	0.056525	0.586791		-0.106781	0.346277	2.45416	0.407472	0.0616704		7.07004e-05	0.000509793	0.0619253	0.327905		-0.346277	0.113496	2.4516	0.407896	0.0624235		6.87646e-05	0.000520226	0.0626836	0.31253		0.261763	-0.261763	2.40935	0.41505	0.0788187		1.16732e-05	0.000646055	0.0791417	0.042721
						0.00657282	0.34582	2.46472	0.405726	0.0567619		0.000117668	0.000474084	0.056999	0.586843		-0.107007	0.34582	2.45373	0.407542	0.0621802		7.071e-05	0.000509859	0.0624351	0.327906		-0.34582	0.113745	2.45119	0.407965	0.0629437		6.87855e-05	0.000520382	0.0632039	0.312531		0.26222	-0.26222	2.40928	0.415062	0.0794647		1.16732e-05	0.000646055	0.0797877	0.042721
						0.00669956	0.345363	2.464	0.405844	0.057236		0.000117912	0.000474448	0.0574732	0.587608		-0.107234	0.345363	2.45331	0.407613	0.06269		7.07194e-05	0.000509925	0.062945	0.327907		-0.345363	0.113994	2.45078	0.408034	0.0634641		6.52259e-05	0.000520539	0.0637244	0.296269		0.262677	-0.262677	2.40921	0.415074	0.0801108		1.16732e-05	0.000646055	0.0804338	0.042721
						0.00682765	0.344906	2.46329	0.405962	0.0577104		0.00011977	0.000474825	0.0579479	0.596392		-0.10746	0.344906	2.45288	0.407684	0.0632		7.07286e-05	0.00050999	0.063455	0.327909		-0.344906	0.114243	2.45039	0.408099	0.0639847		6.36931e-05	0.000520697	0.064245	0.289219		0.263134	-0.263134	2.40914	0.415085	0.0807568		1.16732e-05	0.000646055	0.0810799	0.042721
						0.00695714	0.34445	2.46256	0.406082	0.0581853		0.000119866	0.000475215	0.0584229	0.596385		-0.107687	0.34445	2.45246	0.407755	0.0637099		6.9966e-05	0.000510053	0.063965	0.324333		-0.34445	0.114493	2.45	0.408163	0.0645054		6.37117e-05	0.000520855	0.0647658	0.289216		0.263591	-0.263591	2.40908	0.415097	0.0814029		1.16732e-05	0.000646055	0.0817259	0.042721
						0.00708804	0.343993	2.46183	0.406202	0.0586605		0.000119965	0.000475618	0.0588983	0.596372		-0.107914	0.343993	2.45204	0.407825	0.06422		6.55697e-05	0.000510115	0.0644751	0.303916		-0.343993	0.114743	2.44962	0.408226	0.0650262		6.37305e-05	0.000521013	0.0652867	0.289213		0.264048	-0.264048	2.40901	0.415109	0.0820489		1.16732e-05	0.000646055	0.082372	0.042721
						0.0072204	0.343536	2.46111	0.406322	0.0591361		0.000120067	0.000476034	0.0593741	0.596354		-0.108141	0.343536	2.45164	0.40789	0.0647301		6.55773e-05	0.000510175	0.0649852	0.303916		-0.343536	0.114994	2.44924	0.40829	0.0655472		6.37492e-05	0.000521172	0.0658078	0.28921		0.264504	-0.264504	2.40894	0.41512	0.082695		1.16732e-05	0.000646055	0.083018	0.042721
						0.00735425	0.343079	2.46038	0.406442	0.0596121		0.000120171	0.000476466	0.0598504	0.596329		-0.108368	0.343079	2.45125	0.407956	0.0652403		6.55847e-05	0.000510234	0.0654954	0.303915		-0.343079	0.115245	2.44886	0.408354	0.0660684		6.3768e-05	0.000521332	0.0663291	0.289206		0.264961	-0.264961	2.40887	0.415132	0.083341		1.16732e-05	0.000646055	0.0836641	0.042721
						0.00748962	0.342622	2.45965	0.406562	0.0600886		0.000120277	0.000476913	0.0603271	0.596298		-0.108595	0.342622	2.45085	0.408021	0.0657505		6.55919e-05	0.000510291	0.0660057	0.303914		-0.342622	0.115496	2.44847	0.408418	0.0665897		6.50347e-05	0.000521492	0.0668505	0.29486		0.265418	-0.265418	2.40881	0.415144	0.0839871		1.16732e-05	0.000646055	0.0843101	0.042721
						0.00762656	0.342165	2.45892	0.406682	0.0605655		0.000120386	0.000477376	0.0608042	0.596261		-0.108822	0.342165	2.45046	0.408087	0.0662608		6.55988e-05	0.000510347	0.066516	0.303913		-0.342165	0.115748	2.44808	0.408483	0.0671112		6.27245e-05	0.000521626	0.067372	0.284313		0.265875	-0.265875	2.40874	0.415155	0.0846332		1.16732e-05	0.000646055	0.0849562	0.042721
						0.0077651	0.341709	2.4582	0.406802	0.0610429		0.000102332	0.000477856	0.0612818	0.506332		-0.10905	0.341709	2.45007	0.408152	0.0667712		6.38942e-05	0.000510401	0.0670264	0.295985		-0.341709	0.115999	2.44771	0.408545	0.0676329		5.95897e-05	0.000521746	0.0678937	0.270042		0.266332	-0.266332	2.40867	0.415167	0.0852792		1.25815e-05	0.000646055	0.0856022	0.0460448
						0.00790529	0.341252	2.45758	0.406905	0.0615207		0.000102428	0.000478268	0.0617599	0.506366		-0.109278	0.341252	2.44968	0.408216	0.0672816		6.3906e-05	0.000510495	0.0675368	0.295985		-0.341252	0.116251	2.44735	0.408605	0.0681546		5.96082e-05	0.000521903	0.0684156	0.270045		0.266788	-0.266788	2.4086	0.415179	0.0859253		1.25815e-05	0.000646055	0.0862483	0.0460448
						0.00804688	0.340795	2.45696	0.407007	0.061999		0.000102525	0.000478693	0.0622384	0.506397		-0.109505	0.340795	2.4493	0.40828	0.0677921		6.0274e-05	0.000510588	0.0680474	0.279112		-0.340795	0.116504	2.44699	0.408665	0.0686765		5.96268e-05	0.000522061	0.0689375	0.270048		0.267245	-0.267245	2.40852	0.415192	0.0865713		1.25815e-05	0.000646055	0.0868943	0.0460448
						0.0081899	0.340338	2.45634	0.40711	0.0624777		0.000102624	0.000479131	0.0627173	0.506424		-0.109733	0.340338	2.44894	0.40834	0.0683026		5.94007e-05	0.00051068	0.068558	0.275019		-0.340338	0.116756	2.44664	0.408724	0.0691986		5.96455e-05	0.000522219	0.0694597	0.27005		0.267702	-0.267702	2.40845	0.415205	0.0872174		1.25815e-05	0.000646055	0.0875404	0.0460448
						0.00833437	0.339881	2.45572	0.407212	0.0629568		0.000102726	0.000479582	0.0631966	0.506447		-0.109962	0.339881	2.44858	0.4084	0.0688133		5.94108e-05	0.000510771	0.0690687	0.275016		-0.339881	0.117009	2.44628	0.408784	0.0697208		5.96643e-05	0.000522378	0.069982	0.270053		0.268159	-0.268159	2.40838	0.415217	0.0878634		1.25815e-05	0.000646055	0.0881865	0.0460448
						0.00848034	0.339424	2.4551	0.407315	0.0634364		0.000102829	0.000480048	0.0636764	0.506467		-0.11019	0.339424	2.44822	0.408459	0.0693241		5.94207e-05	0.000510861	0.0695795	0.275014		-0.339424	0.117263	2.44592	0.408844	0.0702432		5.96831e-05	0.000522538	0.0705044	0.270055		0.268616	-0.268616	2.4083	0.41523	0.0885095		1.25815e-05	0.000646055	0.0888325	0.0460448
						0.00862782	0.338968	2.45448	0.407418	0.0639165		0.000102935	0.000480528	0.0641567	0.506482		-0.110419	0.338968	2.44787	0.408519	0.069835		6.01193e-05	0.00051095	0.0700904	0.278199		-0.338968	0.117516	2.44557	0.408903	0.0707657		5.74567e-05	0.000522699	0.0710271	0.259901		0.269073	-0.269073	2.40823	0.415242	0.0891555		1.25815e-05	0.000646055	0.0894786	0.0460448
						0.00877687	0.338511	2.45386	0.407521	0.064397		0.000103043	0.000481024	0.0646375	0.506492		-0.110648	0.338511	2.44751	0.408579	0.0703459		6.10999e-05	0.000511024	0.0706014	0.282695		-0.338511	0.11777	2.44522	0.408961	0.0712884		5.53494e-05	0.00052286	0.0715498	0.250292		0.269529	-0.269529	2.40816	0.415255	0.0898016		1.25815e-05	0.000646055	0.0901246	0.0460448
						0.0089275	0.338054	2.45324	0.407624	0.064878		0.000103436	0.000481536	0.0651188	0.507882		-0.110877	0.338054	2.44714	0.40864	0.0708569		6.11067e-05	0.000511078	0.0711125	0.282697		-0.338054	0.118025	2.44489	0.409016	0.0718113		5.53664e-05	0.000523022	0.0720728	0.250291		0.269986	-0.269986	2.40809	0.415268	0.0904476		1.25815e-05	0.000646055	0.0907707	0.0460448
						0.00907976	0.337597	2.45262	0.407727	0.0653596		0.00010477	0.000482065	0.0656006	0.513869		-0.111106	0.337597	2.44678	0.408701	0.071368		5.90349e-05	0.000511131	0.0716236	0.273084		-0.337597	0.118279	2.44456	0.409071	0.0723343		5.53834e-05	0.000523184	0.0725959	0.25029		0.270443	-0.270443	2.40801	0.41528	0.0910937		1.25815e-05	0.000646055	0.0914167	0.0460448
						0.00923369	0.33714	2.45199	0.407832	0.0658416		0.000104878	0.000482612	0.0660829	0.513814		-0.111335	0.33714	2.44642	0.40876	0.0718791		5.67391e-05	0.000511182	0.0721347	0.262438		-0.33714	0.118534	2.44423	0.409127	0.0728575		5.54004e-05	0.000523347	0.0731191	0.250289		0.2709	-0.2709	2.40794	0.415293	0.0917398		1.25815e-05	0.000646055	0.0920628	0.0460448
						0.00938932	0.336683	2.45136	0.407937	0.0663242		9.01599e-05	0.000483177	0.0665658	0.441191		-0.111565	0.336683	2.44608	0.408817	0.0723903		5.54856e-05	0.000511231	0.0726459	0.256615		-0.336683	0.11879	2.4439	0.409182	0.0733808		5.43928e-05	0.000523511	0.0736426	0.24566		0.271357	-0.271357	2.40787	0.415305	0.0923858		1.34505e-05	0.000646055	0.0927088	0.0492254
						0.0095467	0.336227	2.45082	0.408027	0.0668074		9.02554e-05	0.000483672	0.0670492	0.441206		-0.111794	0.336227	2.44575	0.408872	0.0729016		5.54955e-05	0.00051132	0.0731572	0.256617		-0.336227	0.119046	2.44357	0.409237	0.0739043		5.44137e-05	0.000523712	0.0741662	0.24566		0.271814	-0.271814	2.40779	0.415319	0.0930319		1.34505e-05	0.000646055	0.0933549	0.0492254
						0.00970558	0.33577	2.45028	0.408117	0.0672911		9.03528e-05	0.000484181	0.0675332	0.441218		-0.112024	0.33577	2.44542	0.408928	0.0734129		5.55054e-05	0.000511408	0.0736686	0.256618		-0.33577	0.119302	2.44325	0.409291	0.074428		5.26584e-05	0.000523913	0.07469	0.237644		0.27227	-0.27227	2.40771	0.415332	0.0936779		1.34505e-05	0.000646055	0.0940009	0.0492254
						0.00986601	0.335313	2.44973	0.408208	0.0677753		9.04521e-05	0.000484705	0.0680176	0.441226		-0.112254	0.335313	2.44509	0.408983	0.0739243		5.55151e-05	0.000511495	0.07418	0.256619		-0.335313	0.119558	2.44293	0.409344	0.0749519		5.05617e-05	0.000524116	0.075214	0.228094		0.272727	-0.272727	2.40763	0.415346	0.094324		1.34505e-05	0.000646055	0.094647	0.0492254
						0.010028	0.334856	2.44919	0.408298	0.06826		9.0727e-05	0.000485243	0.0685026	0.442075		-0.112484	0.334856	2.44476	0.409039	0.0744358		5.55247e-05	0.000511581	0.0746916	0.256621		-0.334856	0.119815	2.44263	0.409394	0.0754761		5.05807e-05	0.00052432	0.0757382	0.22809		0.273184	-0.273184	2.40756	0.415359	0.09497		1.34505e-05	0.000646055	0.0952931	0.0492254
						0.0101916	0.334399	2.44865	0.408389	0.0687452		9.0859e-05	0.000485795	0.0689881	0.442216		-0.112714	0.334399	2.44442	0.409094	0.0749474		5.49288e-05	0.000511666	0.0752032	0.253824		-0.334399	0.120072	2.44233	0.409445	0.0760004		5.05997e-05	0.000524526	0.0762626	0.228087		0.273641	-0.273641	2.40748	0.415373	0.0956161		1.34505e-05	0.000646055	0.0959391	0.0492254
						0.0103569	0.333942	2.4481	0.40848	0.069231		9.09659e-05	0.000486362	0.0694742	0.44222		-0.112944	0.333942	2.4441	0.409149	0.075459		5.16705e-05	0.00051175	0.0757149	0.238729		-0.333942	0.12033	2.44203	0.409495	0.0765249		5.06188e-05	0.000524733	0.0767873	0.228083		0.274098	-0.274098	2.4074	0.415386	0.0962621		1.34505e-05	0.000646055	0.0965852	0.0492254
						0.0105238	0.333486	2.44756	0.408571	0.0697174		9.10751e-05	0.000486947	0.0699608	0.442219		-0.113175	0.333486	2.44379	0.409201	0.0759708		5.16787e-05	0.000511833	0.0762267	0.238728		-0.333486	0.120588	2.44173	0.409546	0.0770496		5.20744e-05	0.000524941	0.0773121	0.234549		0.274555	-0.274555	2.40732	0.415399	0.0969082		1.34505e-05	0.000646055	0.0972312	0.0492254
						0.0106924	0.333029	2.44701	0.408662	0.0702043		9.11866e-05	0.00048755	0.0704481	0.442213		-0.113406	0.333029	2.44348	0.409253	0.0764826		5.16868e-05	0.000511914	0.0767386	0.238727		-0.333029	0.120847	2.44142	0.409598	0.0775746		5.21791e-05	0.000525112	0.0778371	0.234944		0.275011	-0.275011	2.40724	0.415413	0.0975542		1.34505e-05	0.000646055	0.0978773	0.0492254
						0.0108627	0.332572	2.44647	0.408753	0.0706919		9.13006e-05	0.000488172	0.070936	0.442201		-0.113637	0.332572	2.44317	0.409304	0.0769945		5.16947e-05	0.000511994	0.0772505	0.238726		-0.332572	0.121106	2.44111	0.40965	0.0780997		5.05887e-05	0.000525282	0.0783623	0.227709		0.275468	-0.275468	2.40717	0.415426	0.0982003		1.34505e-05	0.000646055	0.0985233	0.0492254
						0.0110348	0.332115	2.44592	0.408844	0.07118		9.14171e-05	0.000488813	0.0714244	0.442185		-0.113868	0.332115	2.44286	0.409356	0.0775065		5.17025e-05	0.000512073	0.0777626	0.238726		-0.332115	0.121365	2.4408	0.409701	0.078625		4.84398e-05	0.000525452	0.0788877	0.217966		0.275925	-0.275925	2.40709	0.41544	0.0988464		1.34505e-05	0.000646055	0.0991694	0.0492254
						0.0112087	0.331658	2.44537	0.408936	0.0716689		7.91732e-05	0.000489475	0.0719136	0.382443		-0.114099	0.331658	2.44255	0.409408	0.0780186		5.05772e-05	0.000512151	0.0782747	0.233494		-0.331658	0.121625	2.44052	0.409749	0.0791504		4.77211e-05	0.000525624	0.0794132	0.214662		0.276382	-0.276382	2.40701	0.415453	0.0994924		1.42748e-05	0.000646055	0.0998154	0.052242
						0.0113845	0.331201	2.4449	0.409015	0.0721583		7.92782e-05	0.000490064	0.0724034	0.38249		-0.114331	0.331201	2.44225	0.409458	0.0785307		5.05887e-05	0.000512267	0.0787869	0.233494		-0.331201	0.121885	2.44023	0.409797	0.0796761		4.77405e-05	0.000525831	0.079939	0.214664		0.276839	-0.276839	2.40693	0.415468	0.100138		1.42748e-05	0.000646055	0.100461	0.052242
						0.0115619	0.330745	2.44442	0.409094	0.0726484		7.93852e-05	0.000490668	0.0728937	0.382535		-0.114563	0.330745	2.44195	0.409509	0.079043		4.76681e-05	0.000512382	0.0792992	0.219965		-0.330745	0.122145	2.43995	0.409845	0.0802019		4.77599e-05	0.000526041	0.0804649	0.214666		0.277296	-0.277296	2.40684	0.415482	0.100785		1.42748e-05	0.000646055	0.101108	0.052242
						0.0117409	0.330288	2.44395	0.409174	0.0731391		7.94943e-05	0.00049129	0.0733847	0.382576		-0.114795	0.330288	2.44167	0.409557	0.0795554		4.71713e-05	0.000512497	0.0798116	0.217623		-0.330288	0.122406	2.43966	0.409893	0.0807279		4.77795e-05	0.000526251	0.0809911	0.214668		0.277752	-0.277752	2.40676	0.415496	0.101431		1.42748e-05	0.000646055	0.101754	0.052242
						0.0119217	0.329831	2.44348	0.409253	0.0736303		8.06384e-05	0.000491928	0.0738763	0.387578		-0.115027	0.329831	2.44138	0.409604	0.0800679		4.71812e-05	0.000512611	0.0803242	0.217621		-0.329831	0.122667	2.43938	0.40994	0.0812542		4.77992e-05	0.000526464	0.0815174	0.21467		0.278209	-0.278209	2.40668	0.41551	0.102077		1.42748e-05	0.000646055	0.1024	0.052242
						0.0121042	0.329374	2.44299	0.409334	0.0741223		8.09417e-05	0.000492585	0.0743686	0.388517		-0.11526	0.329374	2.4411	0.409651	0.0805805		4.71911e-05	0.000512724	0.0808369	0.217619		-0.329374	0.122929	2.43909	0.409988	0.0817806		4.63859e-05	0.000526678	0.082044	0.208238		0.278666	-0.278666	2.4066	0.415525	0.102723		1.42748e-05	0.000646055	0.103046	0.052242
						0.0122884	0.328917	2.44251	0.409415	0.0746149		8.10493e-05	0.00049326	0.0748615	0.388501		-0.115492	0.328917	2.44082	0.409698	0.0810932		4.80581e-05	0.000512836	0.0813496	0.221568		-0.328917	0.123191	2.43882	0.410035	0.0823073		4.44447e-05	0.000526893	0.0825708	0.199442		0.279123	-0.279123	2.40651	0.415539	0.103369		1.42748e-05	0.000646055	0.103692	0.052242
						0.0124744	0.32846	2.44203	0.409496	0.0751081		8.11592e-05	0.000493955	0.0753551	0.38848		-0.115725	0.32846	2.44054	0.409746	0.0816061		4.85642e-05	0.000512928	0.0818625	0.223861		-0.32846	0.123453	2.43855	0.410079	0.0828342		4.44627e-05	0.00052711	0.0830978	0.199441		0.27958	-0.27958	2.40643	0.415553	0.104015		1.42748e-05	0.000646055	0.104338	0.052242
						0.0126623	0.328004	2.44154	0.409577	0.0756021		8.12713e-05	0.000494671	0.0758494	0.388454		-0.115959	0.328004	2.44025	0.409795	0.082119		4.85721e-05	0.000513008	0.0823755	0.223863		-0.328004	0.123716	2.43829	0.410123	0.0833613		4.44808e-05	0.000527328	0.083625	0.199439		0.280037	-0.280037	2.40635	0.415567	0.104661		1.42748e-05	0.000646055	0.104984	0.052242
						0.0128521	0.327547	2.44106	0.409658	0.0760967		8.13857e-05	0.000495407	0.0763445	0.388423		-0.116192	0.327547	2.43996	0.409843	0.082632		4.66797e-05	0.000513086	0.0828885	0.215108		-0.327547	0.12398	2.43803	0.410168	0.0838887		4.4499e-05	0.000527548	0.0841524	0.199438		0.280493	-0.280493	2.40627	0.415582	0.105307		1.42748e-05	0.000646055	0.10563	0.052242
						0.0130437	0.32709	2.44058	0.409739	0.0765922		8.15026e-05	0.000496166	0.0768402	0.388386		-0.116426	0.32709	2.43968	0.40989	0.0831451		4.5231e-05	0.000513163	0.0834017	0.208401		-0.32709	0.124244	2.43776	0.410212	0.0844162		4.45173e-05	0.000527769	0.0846801	0.199436		0.28095	-0.28095	2.40618	0.415596	0.105953		1.42748e-05	0.000646055	0.106276	0.052242
						0.0132374	0.326633	2.44009	0.409821	0.0770883		7.12585e-05	0.000496948	0.0773368	0.339035		-0.116659	0.326633	2.43941	0.409935	0.0836582		4.4403e-05	0.000513239	0.0839149	0.204556		-0.326633	0.124508	2.4375	0.410257	0.084944		4.38713e-05	0.000527992	0.085208	0.196459		0.281407	-0.281407	2.4061	0.41561	0.106599		1.5049e-05	0.000646055	0.106922	0.0550756
						0.013433	0.326176	2.43967	0.409892	0.0775853		7.13653e-05	0.000497653	0.0778341	0.339062		-0.116893	0.326176	2.43915	0.40998	0.0841715		4.44131e-05	0.000513352	0.0844282	0.204557		-0.326176	0.124773	2.43724	0.410301	0.085472		4.25215e-05	0.000528251	0.0857361	0.190321		0.281864	-0.281864	2.40601	0.415625	0.107245		1.5049e-05	0.000646055	0.107568	0.0550756
						0.0136304	0.32572	2.43924	0.409964	0.0780829		7.1474e-05	0.000498377	0.0783321	0.339086		-0.117128	0.32572	2.43888	0.410024	0.0846848		4.44231e-05	0.000513465	0.0849416	0.204558		-0.32572	0.125038	2.43698	0.410343	0.0860002		4.08507e-05	0.000528512	0.0862645	0.182752		0.282321	-0.282321	2.40593	0.41564	0.107891		1.5049e-05	0.000646055	0.108214	0.0550756
						0.0138296	0.325263	2.43882	0.410035	0.0785813		7.15848e-05	0.000499119	0.0788309	0.339106		-0.117362	0.325263	2.43862	0.410068	0.0851983		4.4433e-05	0.000513577	0.0854551	0.20456		-0.325263	0.125304	2.43674	0.410384	0.0865287		4.08701e-05	0.000528776	0.0867931	0.182748		0.282778	-0.282778	2.40584	0.415655	0.108537		1.5049e-05	0.000646055	0.10886	0.0550756
						0.0140306	0.324806	2.43839	0.410107	0.0790804		7.16976e-05	0.000499882	0.0793304	0.339123		-0.117597	0.324806	2.43835	0.410113	0.0857119		4.4443e-05	0.000513688	0.0859687	0.204561		-0.324806	0.12557	2.4365	0.410425	0.0870575		4.18983e-05	0.000529042	0.087322	0.187252		0.283234	-0.283234	2.40575	0.41567	0.109183		1.5049e-05	0.000646055	0.109506	0.0550756
						0.0142336	0.324349	2.43796	0.410178	0.0795803		7.18127e-05	0.000500665	0.0798306	0.339135		-0.117832	0.324349	2.43809	0.410157	0.0862256		4.35636e-05	0.000513799	0.0864825	0.20047		-0.324349	0.125837	2.43625	0.410467	0.0875865		4.21992e-05	0.000529278	0.0878512	0.188512		0.283691	-0.283691	2.40566	0.415686	0.109829		1.5049e-05	0.000646055	0.110152	0.0550756
						0.0144385	0.323892	2.43754	0.41025	0.080081		7.19299e-05	0.00050147	0.0803317	0.339144		-0.118067	0.323892	2.43783	0.410201	0.0867394		4.14545e-05	0.000513909	0.0869963	0.190724		-0.323892	0.126104	2.436	0.410509	0.0881158		4.22182e-05	0.000529506	0.0883806	0.188516		0.284148	-0.284148	2.40558	0.415701	0.110475		1.5049e-05	0.000646055	0.110798	0.0550756
						0.0146453	0.323435	2.43711	0.410322	0.0805824		7.20495e-05	0.000502297	0.0808336	0.339148		-0.118302	0.323435	2.43758	0.410242	0.0872533		4.14631e-05	0.000514018	0.0875103	0.190723		-0.323435	0.126372	2.43575	0.410551	0.0886453		4.22373e-05	0.000529737	0.0889102	0.188519		0.284605	-0.284605	2.40549	0.415716	0.111121		1.5049e-05	0.000646055	0.111444	0.0550756
						0.0148541	0.322979	2.43668	0.410394	0.0810847		7.21714e-05	0.000503148	0.0813363	0.339148		-0.118538	0.322979	2.43734	0.410284	0.0877673		4.14717e-05	0.000514127	0.0880244	0.190722		-0.322979	0.12664	2.4355	0.410594	0.0891751		4.07433e-05	0.00052997	0.08944	0.181771		0.285062	-0.285062	2.4054	0.415731	0.111767		1.5049e-05	0.000646055	0.11209	0.0550756
						0.015065	0.322522	2.43625	0.410466	0.0815879		7.2285e-05	0.000504022	0.0818399	0.339092		-0.118774	0.322522	2.43709	0.410325	0.0882814		4.14802e-05	0.000514234	0.0885385	0.190721		-0.322522	0.126909	2.43526	0.410634	0.089705		3.92815e-05	0.000530204	0.0899701	0.175172		0.285519	-0.285519	2.40532	0.415746	0.112414		1.5049e-05	0.000646055	0.112737	0.0550756
						0.0152779	0.322065	2.43582	0.410539	0.0820919		7.24101e-05	0.000504914	0.0823444	0.339079		-0.11901	0.322065	2.43684	0.410367	0.0887957		4.14886e-05	0.000514341	0.0890528	0.19072		-0.322065	0.127178	2.43502	0.410674	0.0902352		3.92992e-05	0.000530441	0.0905005	0.175172		0.285975	-0.285975	2.40523	0.415761	0.11306		1.5049e-05	0.000646055	0.113383	0.0550756
						0.015493	0.321608	2.43539	0.410611	0.0825968		6.37627e-05	0.000505831	0.0828497	0.298044		-0.119246	0.321608	2.4366	0.410408	0.08931		4.07357e-05	0.000514446	0.0895672	0.187221		-0.321608	0.127447	2.43479	0.410713	0.0907657		3.88505e-05	0.000530679	0.091031	0.173095		0.286432	-0.286432	2.40514	0.415776	0.113706		1.57686e-05	0.000646055	0.114029	0.0577088
						0.0157102	0.321151	2.43502	0.410675	0.0831026		6.41122e-05	0.000506668	0.083356	0.299183		-0.119483	0.321151	2.43636	0.410449	0.0898244		4.06297e-05	0.000514588	0.0900817	0.186682		-0.321151	0.127717	2.43456	0.410752	0.0912964		3.88709e-05	0.000530953	0.0915618	0.173096		0.286889	-0.286889	2.40505	0.415792	0.114352		1.57686e-05	0.000646055	0.114675	0.0577088
						0.0159293	0.320694	2.43464	0.410739	0.0836093		6.49181e-05	0.000507526	0.0838631	0.302431		-0.119719	0.320694	2.43612	0.41049	0.090339		3.80528e-05	0.00051473	0.0905964	0.174794		-0.320694	0.127988	2.43433	0.410791	0.0918273		3.88914e-05	0.00053123	0.0920929	0.173097		0.287346	-0.287346	2.40496	0.415807	0.114998		1.57686e-05	0.000646055	0.115321	0.0577088
						0.0161504	0.320238	2.43425	0.410804	0.0841168		6.50306e-05	0.000508406	0.084371	0.302431		-0.119957	0.320238	2.43589	0.410528	0.0908538		3.80628e-05	0.000514871	0.0911112	0.174792		-0.320238	0.128259	2.4341	0.41083	0.0923585		3.89121e-05	0.000531509	0.0926243	0.173098		0.287803	-0.287803	2.40487	0.415823	0.115644		1.57686e-05	0.000646055	0.115967	0.0577088
						0.0163735	0.319781	2.43387	0.410869	0.0846252		6.51453e-05	0.00050931	0.0848799	0.302427		-0.120194	0.319781	2.43566	0.410566	0.0913686		3.80726e-05	0.000515012	0.0916261	0.174789		-0.319781	0.128531	2.43387	0.410868	0.09289		3.73123e-05	0.000531791	0.0931559	0.165894		0.288259	-0.288259	2.40478	0.415839	0.11629		1.57686e-05	0.000646055	0.116613	0.0577088
						0.0165987	0.319324	2.43348	0.410934	0.0851346		6.52621e-05	0.000510238	0.0853897	0.302418		-0.120432	0.319324	2.43544	0.410604	0.0918836		3.84017e-05	0.000515153	0.0921412	0.176252		-0.319324	0.128803	2.43365	0.410906	0.0934218		3.62289e-05	0.000532075	0.0936879	0.160991		0.288716	-0.288716	2.40469	0.415855	0.116936		1.57686e-05	0.000646055	0.117259	0.0577088
						0.016826	0.318867	2.43309	0.410999	0.0856448		6.53812e-05	0.00051119	0.0859004	0.302406		-0.12067	0.318867	2.43521	0.410642	0.0923988		3.92283e-05	0.000515285	0.0926564	0.18		-0.318867	0.129076	2.43343	0.410942	0.0939539		3.62479e-05	0.000532362	0.0942201	0.160989		0.289173	-0.289173	2.4046	0.41587	0.117582		1.57686e-05	0.000646055	0.117905	0.0577088
						0.0170554	0.31841	2.43271	0.411065	0.086156		6.55026e-05	0.000512169	0.0864121	0.302388		-0.120908	0.31841	2.43498	0.410681	0.0929141		3.9237e-05	0.000515394	0.0931718	0.180002		-0.31841	0.129349	2.43322	0.410978	0.0944863		3.62672e-05	0.000532652	0.0947526	0.160987		0.28963	-0.28963	2.4045	0.415886	0.118228		1.57686e-05	0.000646055	0.118551	0.0577088
						0.0172869	0.317953	2.43232	0.41113	0.0866682		6.56264e-05	0.000513174	0.0869247	0.302366		-0.121147	0.317953	2.43474	0.410721	0.0934295		3.92457e-05	0.000515502	0.0936872	0.180004		-0.317953	0.129623	2.433	0.411015	0.0950189		3.62866e-05	0.000532945	0.0952854	0.160984		0.290087	-0.290087	2.40441	0.415902	0.118874		1.57686e-05	0.000646055	0.119197	0.0577088
						0.0175207	0.317497	2.43193	0.411196	0.0871813		6.57527e-05	0.000514207	0.0874384	0.302339		-0.121386	0.317497	2.43451	0.41076	0.093945		3.70952e-05	0.000515609	0.0942028	0.170105		-0.317497	0.129898	2.43279	0.411051	0.0955519		3.63061e-05	0.00053324	0.0958185	0.160982		0.290544	-0.290544	2.40432	0.415918	0.11952		1.57686e-05	0.000646055	0.119843	0.0577088
						0.0177568	0.31704	2.43154	0.411262	0.0876955		6.58815e-05	0.000515269	0.0879532	0.302307		-0.121625	0.31704	2.43429	0.410797	0.0944606		3.66028e-05	0.000515716	0.0947184	0.167812		-0.31704	0.130173	2.43257	0.411087	0.0960851		3.63259e-05	0.000533538	0.0963519	0.160979		0.291	-0.291	2.40423	0.415933	0.120166		1.57686e-05	0.000646055	0.120489	0.0577088
						0.0179951	0.316583	2.43115	0.411327	0.0882108		5.85031e-05	0.000516361	0.088469	0.267882		-0.121864	0.316583	2.43408	0.410834	0.0949763		3.60561e-05	0.000515822	0.0952342	0.165272		-0.316583	0.130448	2.43236	0.411123	0.0966187		3.44172e-05	0.000533839	0.0968856	0.152435		0.291457	-0.291457	2.40414	0.415949	0.120812		1.64292e-05	0.000646055	0.121135	0.0601265
						0.0182358	0.316126	2.43081	0.411386	0.0887272		5.86235e-05	0.000517369	0.0889859	0.267911		-0.122104	0.316126	2.43386	0.41087	0.0954921		3.60663e-05	0.000515963	0.0957501	0.165273		-0.316126	0.130724	2.43216	0.411158	0.0971525		3.45733e-05	0.000534165	0.0974196	0.153033		0.291914	-0.291914	2.40404	0.415966	0.121458		1.64292e-05	0.000646055	0.121781	0.0601265
						0.0184787	0.315669	2.43046	0.411445	0.0892445		5.87461e-05	0.000518403	0.0895037	0.267936		-0.122344	0.315669	2.43365	0.410906	0.0960081		3.60764e-05	0.000516104	0.0962661	0.165274		-0.315669	0.131001	2.43195	0.411192	0.0976867		3.45933e-05	0.000534463	0.0979539	0.153036		0.292371	-0.292371	2.40395	0.415982	0.122104		1.64292e-05	0.000646055	0.122427	0.0601265
						0.0187237	0.315212	2.43011	0.411503	0.0897629		5.8871e-05	0.000519463	0.0900227	0.267958		-0.122584	0.315212	2.43343	0.410942	0.0965242		3.60865e-05	0.000516245	0.0967823	0.165275		-0.315212	0.131279	2.43175	0.411227	0.0982211		3.46134e-05	0.000534764	0.0984885	0.153039		0.292828	-0.292828	2.40385	0.415999	0.12275		1.64292e-05	0.000646055	0.123073	0.0601265
						0.018971	0.314756	2.42977	0.411562	0.0902824		5.89982e-05	0.00052055	0.0905427	0.267976		-0.122824	0.314756	2.43322	0.410978	0.0970404		3.60965e-05	0.000516386	0.0972986	0.165276		-0.314756	0.131557	2.43154	0.411262	0.0987559		3.46338e-05	0.000535068	0.0990234	0.153042		0.293285	-0.293285	2.40376	0.416015	0.123396		1.64292e-05	0.000646055	0.123719	0.0601265
						0.0192205	0.314299	2.42942	0.411621	0.090803		5.91278e-05	0.000521665	0.0910638	0.26799		-0.123065	0.314299	2.43301	0.411014	0.0975568		3.46599e-05	0.000516526	0.0978151	0.158655		-0.314299	0.131835	2.43134	0.411296	0.099291		3.46543e-05	0.000535375	0.0995586	0.153044		0.293741	-0.293741	2.40366	0.416031	0.124042		1.64292e-05	0.000646055	0.124366	0.0601265
						0.0194724	0.313842	2.42907	0.41168	0.0913246		5.92598e-05	0.00052281	0.091586	0.268001		-0.123306	0.313842	2.4328	0.411049	0.0980733		3.3705e-05	0.000516666	0.0983317	0.154242		-0.313842	0.132114	2.43113	0.411331	0.0998263		3.46749e-05	0.000535685	0.100094	0.153047		0.294198	-0.294198	2.40357	0.416048	0.124689		1.64292e-05	0.000646055	0.125012	0.0601265
						0.0197267	0.313385	2.42872	0.41174	0.0918474		5.93944e-05	0.000523985	0.0921094	0.268007		-0.123547	0.313385	2.4326	0.411082	0.09859		3.37139e-05	0.000516805	0.0988484	0.154241		-0.313385	0.132394	2.43093	0.411366	0.100362		3.25348e-05	0.000535999	0.10063	0.143517		0.294655	-0.294655	2.40347	0.416064	0.125335		1.64292e-05	0.000646055	0.125658	0.0601265
						0.0199833	0.312928	2.42837	0.411799	0.0923714		5.94313e-05	0.000525191	0.092634	0.267557		-0.123789	0.312928	2.4324	0.411116	0.0991068		3.37228e-05	0.000516944	0.0993653	0.154241		-0.312928	0.132675	2.43074	0.411398	0.100898		3.22669e-05	0.000536316	0.101166	0.142251		0.295112	-0.295112	2.40338	0.416081	0.125981		1.64292e-05	0.000646055	0.126304	0.0601265
						0.0202424	0.312471	2.42802	0.411858	0.0928966		5.94856e-05	0.000526422	0.0931598	0.267176		-0.124031	0.312471	2.4322	0.41115	0.0996238		3.37316e-05	0.000517083	0.0998823	0.15424		-0.312471	0.132955	2.43054	0.41143	0.101434		3.22861e-05	0.000536636	0.101703	0.142251		0.295569	-0.295569	2.40329	0.416097	0.126627		1.64292e-05	0.000646055	0.12695	0.0601265
						0.020504	0.312015	2.42767	0.411918	0.093423		5.96248e-05	0.00052768	0.0936869	0.267163		-0.124273	0.312015	2.432	0.411184	0.100141		3.37404e-05	0.000517221	0.100399	0.154239		-0.312015	0.133237	2.43035	0.411463	0.101971		3.23055e-05	0.00053696	0.102239	0.14225		0.296026	-0.296026	2.40319	0.416114	0.127273		1.64292e-05	0.000646055	0.127596	0.0601265
						0.0207681	0.311558	2.42732	0.411977	0.0939507		5.33279e-05	0.000528972	0.0942152	0.238364		-0.124516	0.311558	2.4318	0.411217	0.100658		3.32394e-05	0.000517358	0.100917	0.151908		-0.311558	0.133519	2.43016	0.411495	0.102508		3.20409e-05	0.000537288	0.102777	0.140999		0.296482	-0.296482	2.4031	0.41613	0.127919		1.70273e-05	0.000646055	0.128242	0.0623153
						0.0210348	0.311101	2.427	0.412031	0.0944797		5.34594e-05	0.000530177	0.0947448	0.238409		-0.124759	0.311101	2.43161	0.41125	0.101175		3.23509e-05	0.00051753	0.101434	0.147799		-0.311101	0.133802	2.42997	0.411527	0.103045		3.20625e-05	0.00053765	0.103314	0.140999		0.296939	-0.296939	2.403	0.416147	0.128565		1.70273e-05	0.000646055	0.128888	0.0623153
						0.0213038	0.310644	2.42669	0.412084	0.0950099		5.35932e-05	0.000531412	0.0952756	0.23845		-0.125002	0.310644	2.43142	0.411283	0.101693		3.10684e-05	0.000517702	0.101952	0.141892		-0.310644	0.134086	2.42978	0.411559	0.103583		3.18966e-05	0.000538017	0.103852	0.140174		0.297396	-0.297396	2.4029	0.416164	0.129211		1.70273e-05	0.000646055	0.129534	0.0623153
						0.0215753	0.310187	2.42637	0.412138	0.0955413		5.39935e-05	0.000532679	0.0958076	0.23966		-0.125245	0.310187	2.43123	0.411314	0.102211		3.10781e-05	0.000517874	0.10247	0.141889		-0.310187	0.13437	2.4296	0.411591	0.104121		2.98549e-05	0.000538388	0.10439	0.131111		0.297853	-0.297853	2.4028	0.416181	0.129857		1.70273e-05	0.000646055	0.13018	0.0623153
						0.0218493	0.30973	2.42605	0.412192	0.0960739		5.44745e-05	0.000533978	0.0963409	0.241207		-0.125489	0.30973	2.43105	0.411345	0.102729		3.15083e-05	0.000518047	0.102988	0.143805		-0.30973	0.134655	2.42942	0.411621	0.104659		2.9875e-05	0.000538763	0.104929	0.131108		0.29831	-0.29831	2.4027	0.416198	0.130503		1.70273e-05	0.000646055	0.130826	0.0623153
						0.0221258	0.309274	2.42573	0.412246	0.0966079		5.46075e-05	0.000535311	0.0968756	0.241193		-0.125734	0.309274	2.43086	0.411377	0.103247		3.20728e-05	0.000518206	0.103506	0.146337		-0.309274	0.13494	2.42924	0.411651	0.105198		2.98953e-05	0.000539143	0.105468	0.131105		0.298767	-0.298767	2.4026	0.416215	0.131149		1.70273e-05	0.000646055	0.131472	0.0623153
						0.0224048	0.308817	2.42541	0.412301	0.0971432		5.4743e-05	0.000536679	0.0974116	0.241176		-0.125978	0.308817	2.43067	0.411409	0.103765		3.2082e-05	0.000518347	0.104024	0.146339		-0.308817	0.135227	2.42907	0.411681	0.105737		2.99159e-05	0.000539527	0.106007	0.131102		0.299223	-0.299223	2.40251	0.416232	0.131795		1.70273e-05	0.000646055	0.132118	0.0623153
						0.0226865	0.30836	2.42509	0.412356	0.0976799		5.48812e-05	0.000538083	0.097949	0.241153		-0.126223	0.30836	2.43048	0.411441	0.104283		3.20912e-05	0.000518488	0.104542	0.146341		-0.30836	0.135514	2.42889	0.411711	0.106277		3.03842e-05	0.000539915	0.106547	0.133058		0.29968	-0.29968	2.40241	0.416249	0.132441		1.70273e-05	0.000646055	0.132764	0.0623153
						0.0229708	0.307903	2.42477	0.412411	0.098218		5.50221e-05	0.000539525	0.0984878	0.241127		-0.126468	0.307903	2.43029	0.411473	0.104802		3.15692e-05	0.000518629	0.105061	0.143922		-0.307903	0.135801	2.42871	0.411741	0.106817		3.10059e-05	0.00054029	0.107087	0.135687		0.300137	-0.300137	2.40231	0.416266	0.133087		1.70273e-05	0.000646055	0.13341	0.0623153
						0.0232578	0.307446	2.42444	0.412466	0.0987575		5.51658e-05	0.000541005	0.099028	0.241095		-0.126714	0.307446	2.43011	0.411504	0.10532		2.99402e-05	0.000518769	0.10558	0.136458		-0.307446	0.13609	2.42853	0.411772	0.107357		3.03011e-05	0.000540643	0.107627	0.132516		0.300594	-0.300594	2.40221	0.416283	0.133733		1.70273e-05	0.000646055	0.134056	0.0623153
						0.0235476	0.306989	2.42412	0.412521	0.0992985		5.53125e-05	0.000542526	0.0995698	0.241058		-0.12696	0.306989	2.42993	0.411534	0.105839		2.99483e-05	0.000518909	0.106098	0.136459		-0.306989	0.136379	2.42835	0.411802	0.107898		2.88254e-05	0.000541	0.108168	0.125979		0.301051	-0.301051	2.40211	0.4163	0.134379		1.70273e-05	0.000646055	0.134702	0.0623153
						0.0238403	0.306533	2.4238	0.412576	0.099841		4.98599e-05	0.000544089	0.100113	0.216671		-0.127206	0.306533	2.42975	0.411564	0.106358		2.95966e-05	0.000519048	0.106617	0.13482		-0.306533	0.136669	2.42818	0.411831	0.108439		2.86744e-05	0.000541361	0.108709	0.125235		0.301508	-0.301508	2.40201	0.416317	0.135025		1.75598e-05	0.000646055	0.135348	0.0642641
						0.0241358	0.306076	2.4235	0.412626	0.100385		4.99999e-05	0.000545561	0.100658	0.216693		-0.127452	0.306076	2.42958	0.411594	0.106877		2.96067e-05	0.000519221	0.107137	0.134821		-0.306076	0.136959	2.42801	0.41186	0.10898		2.86958e-05	0.000541758	0.109251	0.125237		0.301964	-0.301964	2.40191	0.416335	0.135671		1.75598e-05	0.000646055	0.135994	0.0642641
						0.024434	0.305619	2.42321	0.412676	0.100931		5.01424e-05	0.00054707	0.101204	0.216712		-0.127699	0.305619	2.42941	0.411623	0.107396		2.96168e-05	0.000519395	0.107656	0.134822		-0.305619	0.137251	2.42784	0.411888	0.109522		2.87175e-05	0.000542159	0.109793	0.125239		0.302421	-0.302421	2.40181	0.416352	0.136318		1.75598e-05	0.000646055	0.136641	0.0642641
						0.024735	0.305162	2.42291	0.412726	0.101478		5.02877e-05	0.000548617	0.101752	0.216726		-0.127946	0.305162	2.42923	0.411653	0.107916		2.96269e-05	0.000519568	0.108175	0.134823		-0.305162	0.137543	2.42767	0.411917	0.110064		2.87395e-05	0.000542566	0.110335	0.125241		0.302878	-0.302878	2.40171	0.41637	0.136964		1.75598e-05	0.000646055	0.137287	0.0642641
						0.0250388	0.304705	2.42262	0.412776	0.102026		5.02093e-05	0.000550204	0.102301	0.215764		-0.128194	0.304705	2.42906	0.411683	0.108435		2.94331e-05	0.000519742	0.108695	0.133896		-0.304705	0.137835	2.4275	0.411946	0.110606		2.87616e-05	0.000542977	0.110878	0.125242		0.303335	-0.303335	2.40161	0.416388	0.13761		1.75598e-05	0.000646055	0.137933	0.0642641
						0.0253455	0.304249	2.42232	0.412827	0.102577		5.02662e-05	0.000551815	0.102852	0.215378		-0.128441	0.304249	2.42888	0.411712	0.108955		2.76605e-05	0.000519915	0.109215	0.12579		-0.304249	0.138129	2.42733	0.411975	0.111149		2.75229e-05	0.000543394	0.111421	0.119756		0.303792	-0.303792	2.40151	0.416405	0.138256		1.75598e-05	0.000646055	0.138579	0.0642641
						0.025655	0.303792	2.42203	0.412877	0.103128		5.04148e-05	0.000553461	0.103405	0.215372		-0.12869	0.303792	2.42872	0.41174	0.109475		2.76696e-05	0.000520089	0.109735	0.125789		-0.303792	0.138423	2.42717	0.412002	0.111693		2.67473e-05	0.000543817	0.111965	0.116291		0.304249	-0.304249	2.40141	0.416423	0.138902		1.75598e-05	0.000646055	0.139225	0.0642641
						0.0259674	0.303335	2.42173	0.412927	0.103682		5.05664e-05	0.000555152	0.103959	0.215362		-0.128938	0.303335	2.42856	0.411767	0.109995		2.76786e-05	0.000520263	0.110255	0.125788		-0.303335	0.138718	2.42701	0.412029	0.112237		2.67681e-05	0.000544245	0.112509	0.11629		0.304705	-0.304705	2.40131	0.41644	0.139548		1.75598e-05	0.000646055	0.139871	0.0642641
						0.0262829	0.302878	2.42144	0.412978	0.104237		5.07211e-05	0.000556888	0.104515	0.215348		-0.129187	0.302878	2.42839	0.411795	0.110515		2.76876e-05	0.000520436	0.110775	0.125787		-0.302878	0.139014	2.42686	0.412056	0.112781		2.67891e-05	0.000544678	0.113053	0.116289		0.305162	-0.305162	2.4012	0.416458	0.140194		1.75598e-05	0.000646055	0.140517	0.0642641
						0.0266014	0.302421	2.42114	0.413029	0.104794		5.08789e-05	0.000558671	0.105073	0.215328		-0.129437	0.302421	2.42823	0.411823	0.111036		2.76965e-05	0.00052061	0.111296	0.125786		-0.302421	0.13931	2.4267	0.412082	0.113326		2.68103e-05	0.000545117	0.113598	0.116287		0.305619	-0.305619	2.4011	0.416475	0.14084		1.75598e-05	0.000646055	0.141163	0.0642641
						0.026923	0.301964	2.42084	0.413079	0.105353		5.10401e-05	0.000560503	0.105633	0.215304		-0.129686	0.301964	2.42807	0.41185	0.111556		2.77055e-05	0.000520783	0.111817	0.125785		-0.301964	0.139608	2.42654	0.412109	0.113871		2.68317e-05	0.000545562	0.114143	0.116285		0.306076	-0.306076	2.401	0.416493	0.141486		1.75598e-05	0.000646055	0.141809	0.0642641
						0.0272477	0.301508	2.42054	0.41313	0.105913		4.63517e-05	0.000562387	0.106194	0.194872		-0.129936	0.301508	2.4279	0.411878	0.112077		2.73825e-05	0.000520956	0.112337	0.124277		-0.301508	0.139906	2.42638	0.412136	0.114416		2.66991e-05	0.000546013	0.114689	0.115615		0.306533	-0.306533	2.4009	0.41651	0.142132		1.80242e-05	0.000646055	0.142455	0.065964
						0.0275757	0.301051	2.42027	0.413177	0.106475		4.65071e-05	0.000564176	0.106758	0.194905		-0.130187	0.301051	2.42774	0.411906	0.112598		2.55944e-05	0.000521162	0.112859	0.116116		-0.301051	0.140205	2.42623	0.412163	0.114962		2.49164e-05	0.0005465	0.115235	0.107799		0.306989	-0.306989	2.4008	0.416528	0.142778		1.80242e-05	0.000646055	0.143101	0.065964
						0.0279068	0.300594	2.42	0.413223	0.10704		4.66655e-05	0.000566011	0.107323	0.194935		-0.130438	0.300594	2.42759	0.411931	0.113119		2.56992e-05	0.000521369	0.11338	0.116545		-0.300594	0.140505	2.42608	0.412188	0.115509		2.51529e-05	0.000546993	0.115782	0.108724		0.307446	-0.307446	2.40069	0.416546	0.143424		1.80242e-05	0.000646055	0.143747	0.065964
						0.028241	0.300137	2.41973	0.41327	0.107606		4.6827e-05	0.000567894	0.10789	0.194961		-0.130689	0.300137	2.42744	0.411957	0.11364		2.64415e-05	0.000521572	0.113901	0.119865		-0.300137	0.140806	2.42593	0.412213	0.116056		2.57963e-05	0.000547477	0.116329	0.111407		0.307903	-0.307903	2.40059	0.416565	0.14407		1.80242e-05	0.000646055	0.144393	0.065964
						0.0285783	0.29968	2.41945	0.413317	0.108174		4.69918e-05	0.000569827	0.108458	0.194983		-0.13094	0.29968	2.42728	0.411983	0.114162		2.64509e-05	0.000521749	0.114423	0.119866		-0.29968	0.141108	2.42578	0.412239	0.116603		2.58187e-05	0.000547936	0.116877	0.11141		0.30836	-0.30836	2.40048	0.416583	0.144716		1.80242e-05	0.000646055	0.145039	0.065964
						0.0289189	0.299223	2.41918	0.413364	0.108743		4.71599e-05	0.000571812	0.109029	0.195002		-0.131193	0.299223	2.42713	0.41201	0.114684		2.64602e-05	0.000521926	0.114945	0.119868		-0.299223	0.14141	2.42563	0.412265	0.117151		2.58414e-05	0.000548401	0.117425	0.111413		0.308817	-0.308817	2.40038	0.416601	0.145362		1.80242e-05	0.000646055	0.145685	0.065964
						0.0292628	0.298767	2.4189	0.413411	0.109315		4.73314e-05	0.00057385	0.109602	0.195016		-0.131445	0.298767	2.42697	0.412036	0.115206		2.64696e-05	0.000522102	0.115467	0.11987		-0.298767	0.141714	2.42548	0.41229	0.117699		2.58644e-05	0.000548873	0.117974	0.111417		0.309274	-0.309274	2.40028	0.416619	0.146008		1.80242e-05	0.000646055	0.146331	0.065964
						0.0296101	0.29831	2.41862	0.413458	0.109889		4.75066e-05	0.000575943	0.110177	0.195027		-0.131698	0.29831	2.42682	0.412063	0.115728		2.64789e-05	0.000522279	0.115989	0.119872		-0.29831	0.142018	2.42532	0.412316	0.118248		2.52676e-05	0.000549351	0.118523	0.108751		0.30973	-0.30973	2.40017	0.416637	0.146654		1.80242e-05	0.000646055	0.146977	0.065964
						0.0299609	0.297853	2.41835	0.413506	0.110465		4.74681e-05	0.000578093	0.110754	0.194144		-0.131951	0.297853	2.42666	0.412089	0.11625		2.486e-05	0.000522456	0.116511	0.112505		-0.297853	0.142323	2.42517	0.412341	0.118798		2.40116e-05	0.000549837	0.119073	0.103254		0.310187	-0.310187	2.40007	0.416655	0.1473		1.80242e-05	0.000646055	0.147623	0.065964
						0.0303151	0.297396	2.41807	0.413553	0.111043		4.73935e-05	0.000580286	0.111333	0.193106		-0.132204	0.297396	2.42651	0.412114	0.116773		2.46822e-05	0.000522632	0.117034	0.111662		-0.297396	0.142629	2.42503	0.412365	0.119348		2.40332e-05	0.00055033	0.119623	0.103254		0.310644	-0.310644	2.39997	0.416673	0.147947		1.80242e-05	0.000646055	0.14827	0.065964
						0.0306729	0.296939	2.41779	0.413601	0.111623		4.75722e-05	0.00058252	0.111915	0.193091		-0.132458	0.296939	2.42637	0.412139	0.117295		2.46905e-05	0.000522809	0.117557	0.111662		-0.296939	0.142936	2.42489	0.41239	0.119898		2.40551e-05	0.000550829	0.120173	0.103255		0.311101	-0.311101	2.39986	0.416691	0.148593		1.80242e-05	0.000646055	0.148916	0.065964
						0.0310344	0.296482	2.41751	0.413648	0.112206		4.35414e-05	0.000584819	0.112498	0.176035		-0.132712	0.296482	2.42622	0.412163	0.117818		2.44797e-05	0.000522985	0.118079	0.110672		-0.296482	0.143244	2.42475	0.412414	0.120449		2.40096e-05	0.000551337	0.120724	0.102964		0.311558	-0.311558	2.39976	0.416709	0.149239		1.84189e-05	0.000646055	0.149562	0.0674083
						0.0313995	0.296026	2.41726	0.413692	0.112791		4.37153e-05	0.000587021	0.113084	0.176076		-0.132967	0.296026	2.42608	0.412188	0.118341		2.44897e-05	0.000523194	0.118603	0.110672		-0.296026	0.143552	2.42461	0.412438	0.121		2.40333e-05	0.000551879	0.121276	0.102965		0.312015	-0.312015	2.39965	0.416727	0.149885		1.84189e-05	0.000646055	0.150208	0.0674083
						0.0317682	0.295569	2.417	0.413735	0.113378		4.38929e-05	0.000589282	0.113672	0.176113		-0.133222	0.295569	2.42593	0.412212	0.118864		2.44996e-05	0.000523404	0.119126	0.110673		-0.295569	0.143862	2.42447	0.412462	0.121552		2.40572e-05	0.00055243	0.121828	0.102965		0.312471	-0.312471	2.39955	0.416746	0.150531		1.84189e-05	0.000646055	0.150854	0.0674083
						0.0321404	0.295112	2.41675	0.413779	0.113967		4.40743e-05	0.000591604	0.114263	0.176146		-0.133478	0.295112	2.42579	0.412237	0.119388		2.45095e-05	0.000523614	0.119649	0.110673		-0.295112	0.144173	2.42433	0.412486	0.122104		2.2736e-05	0.00055299	0.122381	0.0972111		0.312928	-0.312928	2.39944	0.416764	0.151177		1.84189e-05	0.000646055	0.1515	0.0674083
						0.0325163	0.294655	2.41649	0.413823	0.114559		4.42596e-05	0.000593991	0.114856	0.176176		-0.133733	0.294655	2.42565	0.412261	0.119911		2.31194e-05	0.000523825	0.120173	0.104354		-0.294655	0.144484	2.42419	0.412508	0.122657		2.23298e-05	0.000553558	0.122934	0.0953763		0.313385	-0.313385	2.39933	0.416782	0.151823		1.84189e-05	0.000646055	0.152146	0.0674083
						0.0328959	0.294198	2.41623	0.413868	0.115153		4.44488e-05	0.000596443	0.115451	0.176202		-0.13399	0.294198	2.42551	0.412284	0.120435		2.28518e-05	0.000524036	0.120697	0.103104		-0.294198	0.144797	2.42406	0.412531	0.123211		2.23523e-05	0.000554134	0.123488	0.0953733		0.313842	-0.313842	2.39923	0.416801	0.152469		1.84189e-05	0.000646055	0.152792	0.0674083
						0.0332794	0.293741	2.41597	0.413912	0.115749		4.46422e-05	0.000598964	0.116049	0.176224		-0.134247	0.293741	2.42538	0.412307	0.120959		2.28607e-05	0.000524248	0.121221	0.103103		-0.293741	0.14511	2.42393	0.412553	0.123765		2.23752e-05	0.00055472	0.124042	0.0953702		0.314299	-0.314299	2.39912	0.416819	0.153115		1.84189e-05	0.000646055	0.153438	0.0674083
						0.0336668	0.293285	2.41571	0.413957	0.116348		4.48399e-05	0.000601556	0.116649	0.176241		-0.134504	0.293285	2.42524	0.41233	0.121483		2.28696e-05	0.00052446	0.121746	0.103102		-0.293285	0.145425	2.4238	0.412575	0.12432		2.24331e-05	0.000555315	0.124597	0.0955145		0.314756	-0.314756	2.39902	0.416838	0.153761		1.84189e-05	0.000646055	0.154084	0.0674083
						0.0340582	0.292828	2.41545	0.414002	0.11695		4.5042e-05	0.000604222	0.117252	0.176255		-0.134761	0.292828	2.42511	0.412353	0.122008		2.28786e-05	0.000524672	0.12227	0.1031		-0.292828	0.145741	2.42367	0.412598	0.124875		2.33245e-05	0.000555918	0.125153	0.0992021		0.315212	-0.315212	2.39891	0.416856	0.154407		1.84189e-05	0.000646055	0.15473	0.0674083
						0.0344536	0.292371	2.41519	0.414047	0.117554		4.52487e-05	0.000606965	0.117857	0.176263		-0.135019	0.292371	2.42497	0.412376	0.122532		2.28875e-05	0.000524885	0.122795	0.103099		-0.292371	0.146058	2.42353	0.412621	0.125431		2.29161e-05	0.00055648	0.125709	0.0973667		0.315669	-0.315669	2.3988	0.416874	0.155053		1.84189e-05	0.000646055	0.155376	0.0674083
						0.0348533	0.291914	2.41492	0.414092	0.118161		4.53367e-05	0.000609787	0.118466	0.175788		-0.135278	0.291914	2.42484	0.412399	0.123057		2.28965e-05	0.000525097	0.12332	0.103098		-0.291914	0.146375	2.4234	0.412644	0.125987		2.16056e-05	0.000557051	0.126266	0.0917046		0.316126	-0.316126	2.3987	0.416893	0.155699		1.84189e-05	0.000646055	0.156022	0.0674083
						0.0352572	0.291457	2.41466	0.414137	0.118771		4.13881e-05	0.000612683	0.119077	0.15972		-0.135537	0.291457	2.4247	0.412422	0.123582		2.1802e-05	0.00052531	0.123845	0.0981296		-0.291457	0.146694	2.42327	0.412666	0.126545		2.16328e-05	0.000557632	0.126823	0.0917244		0.316583	-0.316583	2.39859	0.416911	0.156345		1.87424e-05	0.000646055	0.156668	0.0685923
						0.0356655	0.291	2.41442	0.414179	0.119383		4.16161e-05	0.00061544	0.119691	0.15988		-0.135796	0.291	2.42457	0.412444	0.124108		2.19184e-05	0.000525541	0.124371	0.0986099		-0.291	0.147014	2.42314	0.412687	0.127102		2.16572e-05	0.000558248	0.127381	0.0917264		0.31704	-0.31704	2.39848	0.41693	0.156991		1.87424e-05	0.000646055	0.157314	0.0685923
						0.0360779	0.290544	2.41417	0.41422	0.119999		4.18919e-05	0.000618276	0.120308	0.160201		-0.136056	0.290544	2.42445	0.412465	0.124633		2.19276e-05	0.000525755	0.124896	0.0986116		-0.290544	0.147335	2.42301	0.412709	0.12766		2.16819e-05	0.000558875	0.12794	0.0917281		0.317497	-0.317497	2.39838	0.416949	0.157637		1.87424e-05	0.000646055	0.15796	0.0685923
						0.0364945	0.290087	2.41393	0.414262	0.120617		4.20878e-05	0.000621194	0.120928	0.160195		-0.136316	0.290087	2.42432	0.412487	0.125159		2.19369e-05	0.000525969	0.125422	0.0986131		-0.290087	0.147657	2.42289	0.412731	0.128219		2.1707e-05	0.000559512	0.128499	0.0917297		0.317953	-0.317953	2.39827	0.416968	0.158283		1.87424e-05	0.000646055	0.158606	0.0685923
						0.0369154	0.28963	2.41369	0.414304	0.121238		4.22883e-05	0.000624196	0.12155	0.160184		-0.136577	0.28963	2.42419	0.412509	0.125685		2.19462e-05	0.000526184	0.125948	0.0986147		-0.28963	0.14798	2.42276	0.412752	0.128779		2.17325e-05	0.00056016	0.129059	0.091731		0.31841	-0.31841	2.39816	0.416986	0.158929		1.87424e-05	0.000646055	0.159252	0.0685923
						0.0373408	0.289173	2.41344	0.414347	0.121862		4.24935e-05	0.000627286	0.122176	0.160168		-0.136838	0.289173	2.42406	0.412531	0.126211		2.19555e-05	0.000526399	0.126474	0.0986162		-0.289173	0.148304	2.42263	0.412774	0.129339		2.04482e-05	0.000560819	0.129619	0.0862087		0.318867	-0.318867	2.39805	0.417005	0.159575		1.87424e-05	0.000646055	0.159899	0.0685923
						0.0377706	0.288716	2.41319	0.414389	0.12249		4.27035e-05	0.000630467	0.122805	0.160148		-0.137099	0.288716	2.42393	0.412553	0.126738		2.19648e-05	0.000526615	0.127001	0.0986176		-0.288716	0.148629	2.42251	0.412795	0.1299		2.01198e-05	0.000561489	0.130181	0.0847231		0.319324	-0.319324	2.39794	0.417024	0.160222		1.87424e-05	0.000646055	0.160545	0.0685923
						0.0382052	0.288259	2.41294	0.414432	0.12312		4.29187e-05	0.000633744	0.123437	0.160122		-0.137361	0.288259	2.4238	0.412575	0.127264		2.07329e-05	0.000526831	0.127528	0.0930481		-0.288259	0.148956	2.42239	0.412815	0.130461		2.01439e-05	0.000562172	0.130742	0.0847217		0.319781	-0.319781	2.39784	0.417043	0.160868		1.87424e-05	0.000646055	0.161191	0.0685923
						0.0386444	0.287803	2.41269	0.414475	0.123754		4.31391e-05	0.00063712	0.124072	0.160092		-0.137624	0.287803	2.42368	0.412596	0.127791		2.04297e-05	0.000527047	0.128055	0.0916499		-0.287803	0.149283	2.42228	0.412835	0.131023		2.01684e-05	0.000562866	0.131305	0.0847201		0.320238	-0.320238	2.39773	0.417061	0.161514		1.87424e-05	0.000646055	0.161837	0.0685923
						0.0390885	0.287346	2.41244	0.414518	0.124391		4.3365e-05	0.000640599	0.124711	0.160056		-0.137887	0.287346	2.42356	0.412616	0.128318		2.04381e-05	0.000527264	0.128582	0.0916499		-0.287346	0.149612	2.42216	0.412855	0.131586		2.01933e-05	0.000563572	0.131868	0.0847182		0.320694	-0.320694	2.39762	0.41708	0.16216		1.87424e-05	0.000646055	0.162483	0.0685923
						0.0395376	0.286889	2.41219	0.414561	0.125032		4.35966e-05	0.000644187	0.125354	0.160015		-0.13815	0.286889	2.42344	0.412637	0.128845		2.04465e-05	0.000527481	0.129109	0.0916498		-0.286889	0.149942	2.42204	0.412875	0.13215		2.02185e-05	0.000564292	0.132432	0.084716		0.321151	-0.321151	2.39751	0.417099	0.162806		1.87424e-05	0.000646055	0.163129	0.0685923
						0.0399918	0.286432	2.41194	0.414605	0.125676		3.99634e-05	0.000644238	0.125998	0.146668		-0.138414	0.286432	2.42332	0.412657	0.129373		2.03414e-05	0.000527698	0.129637	0.0911409		-0.286432	0.150273	2.42192	0.412895	0.132714		1.96417e-05	0.000565024	0.132997	0.0821924		0.321608	-0.321608	2.39741	0.417117	0.163452		1.89941e-05	0.000646055	0.163775	0.0695134
						0.0404486	0.285978	2.4117	0.414645	0.12632		3.94432e-05	0.000640802	0.12664	0.145535		-0.138678	0.285975	2.4232	0.412678	0.129901		2.0351e-05	0.000527948	0.130164	0.0911409		-0.285975	0.150606	2.42181	0.412915	0.133279		1.91767e-05	0.000565794	0.133562	0.0801373		0.322065	-0.322065	2.3973	0.417136	0.164098		1.89941e-05	0.000646055	0.164421	0.0695134
						0.0409054	0.285529	2.41147	0.414684	0.126961		3.92361e-05	0.000637444	0.127279	0.145533		-0.138942	0.285519	2.42308	0.412698	0.130428		2.03606e-05	0.000528198	0.130693	0.0911409		-0.285519	0.15094	2.42169	0.412934	0.133845		1.95721e-05	0.000566547	0.134128	0.0816811		0.322522	-0.322522	2.39719	0.417155	0.164744		1.89941e-05	0.000646055	0.165067	0.0695134
						0.0413623	0.285084	2.41125	0.414723	0.127598		3.90305e-05	0.00063413	0.127915	0.145527		-0.139208	0.285062	2.42296	0.412718	0.130957		1.91749e-05	0.000528449	0.131221	0.0857927		-0.285062	0.151275	2.42158	0.412954	0.134412		1.95985e-05	0.000567287	0.134695	0.0816844		0.322979	-0.322979	2.39708	0.417174	0.16539		1.89941e-05	0.000646055	0.165713	0.0695134
						0.0418191	0.284644	2.41102	0.414762	0.128232		3.88265e-05	0.00063086	0.128548	0.145517		-0.139473	0.284605	2.42285	0.412737	0.131485		1.89324e-05	0.0005287	0.131749	0.0846673		-0.284605	0.151611	2.42146	0.412973	0.134979		1.96253e-05	0.000568042	0.135263	0.0816874		0.323435	-0.323435	2.39697	0.417193	0.166036		1.89941e-05	0.000646055	0.166359	0.0695134
						0.0422759	0.284209	2.41079	0.414801	0.128863		3.86241e-05	0.000627633	0.129177	0.145503		-0.139739	0.284148	2.42274	0.412756	0.132014		1.89411e-05	0.000528953	0.132278	0.0846657		-0.284148	0.151949	2.42135	0.412993	0.135547		1.96525e-05	0.000568811	0.135831	0.0816903		0.323892	-0.323892	2.39686	0.417212	0.166682		1.89941e-05	0.000646055	0.167005	0.0695134
						0.0427327	0.283779	2.41057	0.41484	0.129491		3.84232e-05	0.00062445	0.129803	0.145484		-0.140006	0.283691	2.42263	0.412775	0.132543		1.89498e-05	0.000529206	0.132807	0.084664		-0.283691	0.152288	2.42123	0.413013	0.136116		1.9588e-05	0.000569594	0.1364	0.0813101		0.324349	-0.324349	2.39675	0.417231	0.167328		1.89941e-05	0.000646055	0.167651	0.0695134
						0.0431896	0.283353	2.41035	0.414878	0.130115		3.82238e-05	0.000621309	0.130426	0.145461		-0.140273	0.283234	2.42251	0.412794	0.133072		1.89585e-05	0.000529461	0.133337	0.0846623		-0.283234	0.152628	2.42112	0.413032	0.136685		1.81362e-05	0.000570393	0.13697	0.0751783		0.324806	-0.324806	2.39664	0.41725	0.167974		1.89941e-05	0.000646055	0.168297	0.0695134
						0.0436464	0.282932	2.41012	0.414917	0.130737		3.80261e-05	0.000618211	0.131046	0.145433		-0.140541	0.282778	2.4224	0.412813	0.133601		1.92492e-05	0.000529716	0.133866	0.0859189		-0.282778	0.152969	2.42101	0.41305	0.137256		1.81622e-05	0.000571208	0.137541	0.0751786		0.325263	-0.325263	2.39653	0.417269	0.16862		1.89941e-05	0.000646055	0.168943	0.0695134
						0.0441032	0.282515	2.4099	0.414955	0.131355		3.79026e-05	0.000615155	0.131662	0.145681		-0.140809	0.282321	2.42229	0.412832	0.134131		1.96939e-05	0.000529958	0.134396	0.0878638		-0.282321	0.153312	2.42091	0.413069	0.137827		1.81886e-05	0.000572038	0.138113	0.0751786		0.32572	-0.32572	2.39642	0.417288	0.169266		1.89941e-05	0.000646055	0.169589	0.0695134
						0.0445601	0.282103	2.40968	0.414992	0.13197		3.77538e-05	0.000612142	0.132276	0.145824		-0.141078	0.281864	2.42217	0.412852	0.134661		1.84193e-05	0.00053018	0.134926	0.0821429		-0.281864	0.153657	2.4208	0.413087	0.138399		1.82155e-05	0.000572886	0.138685	0.0751784		0.326176	-0.326176	2.39631	0.417307	0.169912		1.89941e-05	0.000646055	0.170235	0.0695134
						0.0450169	0.281696	2.40946	0.41503	0.132582		3.64469e-05	0.00060917	0.132887	0.141462		-0.141347	0.281407	2.42207	0.412871	0.135191		1.82223e-05	0.000530402	0.135456	0.08123		-0.281407	0.154002	2.42069	0.413105	0.138972		1.83117e-05	0.00057375	0.139259	0.0754614		0.326633	-0.326633	2.39621	0.417326	0.170558		1.91737e-05	0.000646055	0.170881	0.0701708
						0.0454737	0.281293	2.40925	0.415067	0.133191		3.41672e-05	0.000606312	0.133494	0.133239		-0.141616	0.28095	2.42196	0.412889	0.135722		1.82312e-05	0.000530656	0.135987	0.0812312		-0.28095	0.154349	2.42058	0.413123	0.139546		1.83403e-05	0.000574655	0.139833	0.0754601		0.32709	-0.32709	2.3961	0.417346	0.171204		1.91737e-05	0.000646055	0.171528	0.0701708
						0.0459306	0.280894	2.40905	0.415101	0.133798		3.40249e-05	0.000603615	0.134099	0.133277		-0.141886	0.280493	2.42185	0.412907	0.136252		1.82402e-05	0.00053091	0.136518	0.0812323		-0.280493	0.154698	2.42048	0.413142	0.14012		1.71872e-05	0.000575578	0.140408	0.0706024		0.327547	-0.327547	2.39599	0.417365	0.171851		1.91737e-05	0.000646055	0.172174	0.0701708
						0.0463874	0.2805	2.40886	0.415135	0.134401		3.38834e-05	0.000600952	0.134702	0.133311		-0.142157	0.280037	2.42175	0.412925	0.136783		1.82493e-05	0.000531166	0.137049	0.0812334		-0.280037	0.155048	2.42038	0.413159	0.140696		1.69051e-05	0.00057652	0.140984	0.0693301		0.328004	-0.328004	2.39588	0.417384	0.172497		1.91737e-05	0.000646055	0.17282	0.0701708
						0.0468442	0.280109	2.40866	0.415169	0.135002		3.37429e-05	0.000598322	0.135301	0.133342		-0.142428	0.27958	2.42164	0.412944	0.137314		1.82583e-05	0.000531422	0.13758	0.0812344		-0.27958	0.1554	2.42028	0.413176	0.141272		1.69323e-05	0.000577482	0.141561	0.0693259		0.32846	-0.32846	2.39577	0.417403	0.173143		1.91737e-05	0.000646055	0.173466	0.0701708
						0.047301	0.279723	2.40846	0.415202	0.1356		3.36033e-05	0.000595725	0.135898	0.133369		-0.142699	0.279123	2.42153	0.412962	0.137846		1.82673e-05	0.000531679	0.138112	0.0812353		-0.279123	0.155753	2.42018	0.413193	0.14185		1.77169e-05	0.000578465	0.142139	0.0724153		0.328917	-0.328917	2.39566	0.417422	0.173789		1.91737e-05	0.000646055	0.174112	0.0701708
						0.0477579	0.279341	2.40827	0.415236	0.136196		3.34646e-05	0.000593161	0.136493	0.133393		-0.142971	0.278666	2.42142	0.41298	0.138378		1.69505e-05	0.000531937	0.138643	0.0753426		-0.278666	0.156108	2.42007	0.41321	0.142428		1.78061e-05	0.000579408	0.142718	0.0726614		0.329374	-0.329374	2.39555	0.417441	0.174435		1.91737e-05	0.000646055	0.174758	0.0701708
						0.0482147	0.278962	2.40807	0.41527	0.136789		3.33269e-05	0.00059063	0.137085	0.133413		-0.143244	0.278209	2.42132	0.412997	0.138909		1.69279e-05	0.000532195	0.139176	0.0752059		-0.278209	0.156464	2.41997	0.413228	0.143008		1.78366e-05	0.000580368	0.143298	0.0726655		0.329831	-0.329831	2.39544	0.417461	0.175081		1.91737e-05	0.000646055	0.175404	0.0701708
						0.0486715	0.278588	2.40788	0.415303	0.13738		3.31901e-05	0.000588132	0.137674	0.13343		-0.143517	0.277752	2.42123	0.413014	0.139442		1.69361e-05	0.000532455	0.139708	0.0752054		-0.277752	0.156822	2.41987	0.413246	0.143588		1.69691e-05	0.000581348	0.143879	0.0690146		0.330288	-0.330288	2.39533	0.41748	0.175727		1.91737e-05	0.000646055	0.17605	0.0701708
						0.0491284	0.278217	2.40769	0.415336	0.137968		3.30541e-05	0.000585667	0.138261	0.133443		-0.14379	0.277296	2.42113	0.413031	0.139974		1.69442e-05	0.000532715	0.14024	0.0752049		-0.277296	0.157182	2.41977	0.413263	0.144169		1.63974e-05	0.00058235	0.144461	0.0665747		0.330745	-0.330745	2.39522	0.417499	0.176373		1.91737e-05	0.000646055	0.176696	0.0701708
						0.0495852	0.277851	2.4075	0.415369	0.138554		3.29191e-05	0.000583234	0.138845	0.133452		-0.144064	0.276839	2.42103	0.413048	0.140507		1.69524e-05	0.000532975	0.140773	0.0752044		-0.276839	0.157543	2.41967	0.413279	0.144752		1.64266e-05	0.000583376	0.145043	0.0665763		0.331201	-0.331201	2.39511	0.417518	0.177019		1.91737e-05	0.000646055	0.177342	0.0701708
						0.050042	0.277488	2.40731	0.415402	0.139137		3.2352e-05	0.000580833	0.139427	0.131695		-0.144339	0.276382	2.42093	0.413065	0.14104		1.69293e-05	0.000533236	0.141306	0.075065		-0.276382	0.157906	2.41957	0.413296	0.145335		1.65752e-05	0.000584424	0.145627	0.067058		0.331658	-0.331658	2.395	0.417537	0.177665		1.92815e-05	0.000646055	0.177988	0.0705654
						0.0504989	0.27713	2.40712	0.415434	0.139718		3.18545e-05	0.000578494	0.140007	0.130194		-0.144614	0.275925	2.42083	0.413082	0.141573		1.68091e-05	0.000533529	0.14184	0.0744913		-0.275925	0.15827	2.41948	0.413312	0.14592		1.66062e-05	0.000585516	0.146212	0.0670582		0.332115	-0.332115	2.39488	0.417557	0.178311		1.92815e-05	0.000646055	0.178634	0.0705654
						0.0509557	0.276775	2.40693	0.415466	0.140296		3.17252e-05	0.00057621	0.140584	0.13018		-0.144889	0.275468	2.42073	0.413099	0.142107		1.56746e-05	0.000533822	0.142373	0.0694253		-0.275468	0.158637	2.41938	0.413329	0.146505		1.66379e-05	0.000586634	0.146798	0.0670579		0.332572	-0.332572	2.39477	0.417576	0.178957		1.92815e-05	0.000646055	0.17928	0.0705654
						0.0514125	0.276424	2.40675	0.415498	0.140873		2.99524e-05	0.000573954	0.14116	0.123388		-0.145166	0.275011	2.42064	0.413114	0.14264		1.56828e-05	0.000534117	0.142907	0.0694233		-0.275011	0.159005	2.41928	0.413346	0.147092		1.59816e-05	0.000587777	0.147386	0.0642875		0.333029	-0.333029	2.39466	0.417595	0.179603		1.92815e-05	0.000646055	0.179926	0.0705654
						0.0518693	0.276076	2.40658	0.415528	0.141447		2.96244e-05	0.000571807	0.141732	0.122496		-0.145442	0.274555	2.42055	0.41313	0.143175		1.5691e-05	0.000534413	0.143442	0.0694212		-0.274555	0.159375	2.41919	0.413362	0.147679		1.52691e-05	0.000588948	0.147974	0.0612993		0.333486	-0.333486	2.39455	0.417614	0.180249		1.92815e-05	0.000646055	0.180572	0.0705654
						0.0523262	0.275732	2.40641	0.415558	0.142018		2.95215e-05	0.000569696	0.142303	0.122522		-0.14572	0.274098	2.42045	0.413146	0.143709		1.63287e-05	0.00053471	0.143976	0.0722024		-0.274098	0.159746	2.4191	0.413377	0.148268		1.52995e-05	0.000590148	0.148563	0.0612964		0.333942	-0.333942	2.39444	0.417634	0.180895		1.92815e-05	0.000646055	0.181218	0.0705654
						0.052783	0.275392	2.40623	0.415587	0.142588		2.94191e-05	0.00056761	0.142872	0.122546		-0.145998	0.273641	2.42036	0.413162	0.144244		1.63581e-05	0.000534973	0.144511	0.0722971		-0.273641	0.16012	2.41901	0.413392	0.148859		1.53305e-05	0.000591376	0.149154	0.061293		0.334399	-0.334399	2.39433	0.417653	0.181541		1.92815e-05	0.000646055	0.181864	0.0705654
						0.0532398	0.275055	2.40606	0.415616	0.143156		2.93174e-05	0.000565551	0.143438	0.122567		-0.146276	0.273184	2.42026	0.413178	0.144779		1.63666e-05	0.000535236	0.145046	0.0722989		-0.273184	0.160495	2.41892	0.413408	0.14945		1.55088e-05	0.000592636	0.149746	0.0618744		0.334856	-0.334856	2.39422	0.417672	0.182187		1.92815e-05	0.000646055	0.18251	0.0705654
						0.0536967	0.274722	2.40589	0.415646	0.143721		2.92162e-05	0.000563517	0.144003	0.122584		-0.146555	0.272727	2.42017	0.413195	0.145314		1.60414e-05	0.000535499	0.145582	0.0708275		-0.272727	0.160873	2.41883	0.413423	0.150043		1.62021e-05	0.000593914	0.15034	0.0645013		0.335313	-0.335313	2.39411	0.417692	0.182833		1.92815e-05	0.000646055	0.183156	0.0705654
						0.0541535	0.274392	2.40573	0.415675	0.144285		2.91155e-05	0.000561508	0.144565	0.122599		-0.146834	0.27227	2.42007	0.413211	0.145849		1.51029e-05	0.000535763	0.146117	0.0666508		-0.27227	0.161252	2.41873	0.413439	0.150636		1.55949e-05	0.000595163	0.150934	0.0619534		0.33577	-0.33577	2.394	0.417711	0.18348		1.92815e-05	0.000646055	0.183803	0.0705654
						0.0546103	0.274065	2.40556	0.415704	0.144846		2.90155e-05	0.000559525	0.145126	0.122611		-0.147114	0.271814	2.41998	0.413226	0.146385		1.51105e-05	0.000536028	0.146653	0.0666514		-0.271814	0.161634	2.41864	0.413455	0.151232		1.48262e-05	0.000596444	0.15153	0.0587731		0.336227	-0.336227	2.39389	0.41773	0.184126		1.92815e-05	0.000646055	0.184449	0.0705654
						0.0550671	0.273742	2.40539	0.415733	0.145406		2.84824e-05	0.000557567	0.145685	0.120781		-0.147395	0.271357	2.4199	0.413241	0.146921		1.51471e-05	0.000536293	0.147189	0.06678		-0.271357	0.162017	2.41856	0.41347	0.151828		1.50219e-05	0.00059776	0.152127	0.059418		0.336683	-0.336683	2.39378	0.417749	0.184772		1.93181e-05	0.000646055	0.185095	0.0706992
						0.055524	0.273422	2.40522	0.415762	0.145963		2.80185e-05	0.00055566	0.146241	0.119221		-0.147676	0.2709	2.41981	0.413256	0.147457		1.51556e-05	0.000536588	0.147726	0.0667805		-0.2709	0.162403	2.41847	0.413485	0.152426		1.50566e-05	0.000599125	0.152725	0.0594195		0.33714	-0.33714	2.39367	0.417769	0.185418		1.93181e-05	0.000646055	0.185741	0.0706992
						0.0559808	0.273106	2.40506	0.41579	0.146519		2.79225e-05	0.000553799	0.146796	0.119213		-0.147957	0.270443	2.41972	0.413271	0.147994		1.5164e-05	0.000536885	0.148262	0.0667809		-0.270443	0.162791	2.41838	0.4135	0.153025		1.50921e-05	0.000600527	0.153325	0.0594205		0.337597	-0.337597	2.39356	0.417788	0.186064		1.93181e-05	0.000646055	0.186387	0.0706992
						0.0564376	0.272793	2.4049	0.415818	0.147073		2.78271e-05	0.00055196	0.147349	0.119201		-0.148239	0.269986	2.41963	0.413286	0.148531		1.51725e-05	0.000537183	0.148799	0.0667813		-0.269986	0.16318	2.41829	0.413515	0.153625		1.51284e-05	0.000601966	0.153926	0.0594211		0.338054	-0.338054	2.39345	0.417807	0.18671		1.93181e-05	0.000646055	0.187033	0.0706992
						0.0568945	0.272483	2.40474	0.415845	0.147625		2.77322e-05	0.000550143	0.1479	0.119186		-0.148522	0.269529	2.41954	0.413302	0.149068		1.46344e-05	0.000537482	0.149337	0.064377		-0.269529	0.163572	2.4182	0.41353	0.154227		1.4478e-05	0.000603445	0.154529	0.056727		0.338511	-0.338511	2.39334	0.417827	0.187356		1.93181e-05	0.000646055	0.187679	0.0706992
						0.0573513	0.272177	2.40458	0.415873	0.148175		2.76377e-05	0.000548349	0.148449	0.119169		-0.148805	0.269073	2.41946	0.413316	0.149606		1.39819e-05	0.000537781	0.149874	0.0614725		-0.269073	0.163967	2.41812	0.413544	0.154831		1.38119e-05	0.000604966	0.155133	0.0539811		0.338968	-0.338968	2.39323	0.417846	0.188002		1.93181e-05	0.000646055	0.188325	0.0706992
						0.0578081	0.271873	2.40442	0.415901	0.148723		2.75437e-05	0.000546577	0.148996	0.119149		-0.149089	0.268616	2.41937	0.41333	0.150143		1.39896e-05	0.000538082	0.150412	0.0614716		-0.268616	0.164363	2.41804	0.413558	0.155436		1.38471e-05	0.00060653	0.155739	0.0539791		0.339424	-0.339424	2.39312	0.417865	0.188648		1.93181e-05	0.000646055	0.188971	0.0706992
						0.058265	0.271573	2.40426	0.415928	0.14927		2.70698e-05	0.000544828	0.149542	0.117475		-0.149373	0.268159	2.41929	0.413344	0.150681		1.39972e-05	0.000538384	0.150951	0.0614707		-0.268159	0.164762	2.41796	0.413572	0.156042		1.38832e-05	0.000608139	0.156346	0.0539766		0.339881	-0.339881	2.393	0.417885	0.189294		1.93181e-05	0.000646055	0.189617	0.0706992
						0.0587218	0.271276	2.4041	0.415955	0.149815		2.59684e-05	0.000543117	0.150086	0.11305		-0.149658	0.267702	2.41921	0.413358	0.15122		1.40048e-05	0.000538687	0.151489	0.0614697		-0.267702	0.165164	2.41788	0.413586	0.156651		1.39202e-05	0.000609796	0.156955	0.0539735		0.340338	-0.340338	2.39289	0.417904	0.18994		1.93181e-05	0.000646055	0.190263	0.0706992
						0.0591786	0.270983	2.40395	0.415981	0.150358		2.58935e-05	0.000541468	0.150628	0.113067		-0.149943	0.267245	2.41913	0.413372	0.151758		1.40125e-05	0.00053899	0.152028	0.0614686		-0.267245	0.165568	2.4178	0.4136	0.15726		1.42447e-05	0.000611502	0.157566	0.0550775		0.340795	-0.340795	2.39278	0.417923	0.190586		1.93181e-05	0.000646055	0.190909	0.0706992
						0.0596354	0.270692	2.4038	0.416007	0.150899		2.58189e-05	0.00053984	0.151169	0.113081		-0.150229	0.266788	2.41905	0.413386	0.152297		1.40202e-05	0.000539295	0.152567	0.0614675		-0.266788	0.165974	2.41771	0.413614	0.157872		1.39046e-05	0.000613229	0.158178	0.0536111		0.341252	-0.341252	2.39267	0.417943	0.191232		1.93181e-05	0.000646055	0.191555	0.0706992
						0.0600923	0.270404	2.40366	0.416033	0.151439		2.53159e-05	0.000538232	0.151708	0.11121		-0.150516	0.266332	2.41896	0.4134	0.152837		1.33892e-05	0.0005396	0.153107	0.0586681		-0.266332	0.166383	2.41763	0.413628	0.158485		1.36372e-05	0.000614954	0.158793	0.0524326		0.341709	-0.341709	2.39256	0.417962	0.191878		1.92842e-05	0.000646055	0.192201	0.0705751
						0.0605491	0.27012	2.40351	0.416058	0.151977		2.48808e-05	0.000536667	0.152246	0.109617		-0.150803	0.265875	2.41889	0.413414	0.153376		1.35242e-05	0.000539929	0.153646	0.0592233		-0.265875	0.166795	2.41755	0.413642	0.1591		1.36775e-05	0.000616739	0.159408	0.0524352		0.342165	-0.342165	2.39245	0.417981	0.192524		1.92842e-05	0.000646055	0.192847	0.0705751
						0.0610059	0.269838	2.40337	0.416083	0.152514		2.48092e-05	0.00053514	0.152781	0.109614		-0.151091	0.265418	2.41881	0.413427	0.153916		1.35319e-05	0.000540227	0.154186	0.0592246		-0.265418	0.167209	2.41747	0.413655	0.159717		1.37189e-05	0.000618581	0.160026	0.0524374		0.342622	-0.342622	2.39234	0.418	0.19317		1.92842e-05	0.000646055	0.193493	0.0705751
						0.0614628	0.269559	2.40322	0.416108	0.153049		2.47379e-05	0.00053363	0.153316	0.109608		-0.151379	0.264961	2.41873	0.413441	0.154457		1.35397e-05	0.000540526	0.154727	0.0592259		-0.264961	0.167626	2.41739	0.413669	0.160335		1.37615e-05	0.000620482	0.160646	0.052439		0.343079	-0.343079	2.39223	0.41802	0.193816		1.92842e-05	0.000646055	0.194139	0.0705751
						0.0619196	0.269284	2.40308	0.416133	0.153583		2.4667e-05	0.000532139	0.153849	0.1096		-0.151668	0.264504	2.41865	0.413454	0.154997		1.35475e-05	0.000540826	0.155267	0.0592271		-0.264504	0.168046	2.41731	0.413683	0.160956		1.38053e-05	0.000622445	0.161267	0.05244		0.343536	-0.343536	2.39212	0.418039	0.194462		1.92842e-05	0.000646055	0.194785	0.0705751
						0.0623764	0.269011	2.40294	0.416157	0.154115		2.45963e-05	0.000530665	0.15438	0.109589		-0.151958	0.264048	2.41857	0.413468	0.155538		1.35553e-05	0.000541126	0.155808	0.0592283		-0.264048	0.168469	2.41723	0.413697	0.161578		1.26426e-05	0.000624473	0.16189	0.0478676		0.343993	-0.343993	2.39201	0.418058	0.195108		1.92842e-05	0.000646055	0.195432	0.0705751
						0.0628332	0.268741	2.40279	0.416182	0.154646		2.47287e-05	0.000529209	0.15491	0.110482		-0.152248	0.263591	2.41849	0.413481	0.156079		1.35631e-05	0.000541427	0.15635	0.0592295		-0.263591	0.168895	2.41716	0.413709	0.162203		1.25278e-05	0.00062657	0.162516	0.0472743		0.34445	-0.34445	2.3919	0.418078	0.195755		1.92842e-05	0.000646055	0.196078	0.0705751
						0.0632901	0.268473	2.40265	0.416207	0.155175		2.48267e-05	0.000527771	0.155439	0.111223		-0.152538	0.263134	2.41841	0.413495	0.15662		1.24852e-05	0.000541729	0.156891	0.0544922		-0.263134	0.169323	2.41708	0.413722	0.162829		1.25708e-05	0.00062874	0.163144	0.0472728		0.344906	-0.344906	2.39179	0.418097	0.196401		1.92842e-05	0.000646055	0.196724	0.0705751
						0.0637469	0.268209	2.40251	0.416232	0.155702		2.47624e-05	0.000526351	0.155966	0.111234		-0.152829	0.262677	2.41834	0.413507	0.157162		1.24264e-05	0.000542032	0.157433	0.0542048		-0.262677	0.169755	2.41701	0.413734	0.163458		1.26151e-05	0.000630986	0.163774	0.0472706		0.345363	-0.345363	2.39168	0.418116	0.197047		1.92842e-05	0.000646055	0.19737	0.0705751
						0.0642037	0.267948	2.40237	0.416256	0.156229		2.46984e-05	0.000524948	0.156491	0.111243		-0.153121	0.26222	2.41826	0.41352	0.157704		1.24333e-05	0.000542335	0.157975	0.0542049		-0.26222	0.170191	2.41694	0.413747	0.164089		1.26609e-05	0.000633313	0.164406	0.0472677		0.34582	-0.34582	2.39157	0.418135	0.197693		1.92842e-05	0.000646055	0.198016	0.0705751
						0.0646606	0.267689	2.40222	0.416281	0.156754		2.46347e-05	0.000523563	0.157016	0.111249		-0.153413	0.261763	2.41819	0.413532	0.158247		1.24403e-05	0.000542639	0.158518	0.0542049		-0.261763	0.170629	2.41686	0.41376	0.164722		1.27728e-05	0.000635725	0.16504	0.0475047		0.346277	-0.346277	2.39146	0.418155	0.198339		1.92842e-05	0.000646055	0.198662	0.0705751
						0.0651174	0.267433	2.40208	0.416306	0.157277		2.41132e-05	0.000522196	0.157538	0.109179		-0.153706	0.261307	2.41812	0.413545	0.158789		1.25331e-05	0.000542943	0.159061	0.0545786		-0.261307	0.171071	2.41679	0.413772	0.165358		1.24188e-05	0.000638177	0.165677	0.0460107		0.346734	-0.346734	2.39135	0.418174	0.198985		1.91807e-05	0.000646055	0.199308	0.0701963
						0.0655742	0.26718	2.40194	0.41633	0.1578		2.36639e-05	0.000520866	0.15806	0.107419		-0.154	0.26085	2.41805	0.413557	0.159332		1.25407e-05	0.000543276	0.159604	0.0545783		-0.26085	0.171517	2.41671	0.413785	0.165996		1.24682e-05	0.000640664	0.166317	0.0460142		0.34719	-0.34719	2.39124	0.418193	0.199631		1.91807e-05	0.000646055	0.199954	0.0701963
						0.0660311	0.26693	2.40181	0.416353	0.15832		2.36028e-05	0.00051957	0.15858	0.107408		-0.154294	0.260393	2.41797	0.41357	0.159875		1.22868e-05	0.000543611	0.160147	0.0534404		-0.260393	0.171966	2.41664	0.413797	0.166637		1.25192e-05	0.000643247	0.166959	0.0460171		0.347647	-0.347647	2.39113	0.418212	0.200277		1.91807e-05	0.000646055	0.2006	0.0701963
						0.0664879	0.266683	2.40167	0.416377	0.15884		2.35418e-05	0.000518289	0.159099	0.107396		-0.154588	0.259936	2.4179	0.413582	0.160419		1.14635e-05	0.000543946	0.160691	0.049829		-0.259936	0.172419	2.41657	0.41381	0.16728		1.2572e-05	0.00064593	0.167603	0.0460192		0.348104	-0.348104	2.39102	0.418232	0.200923		1.91807e-05	0.000646055	0.201246	0.0701963
						0.0669447	0.266438	2.40153	0.416401	0.159358		2.29344e-05	0.000517024	0.159617	0.104881		-0.154884	0.259479	2.41783	0.413593	0.160963		1.14703e-05	0.000544283	0.161235	0.0498275		-0.259479	0.172876	2.4165	0.413822	0.167926		1.25236e-05	0.000643421	0.168248	0.0460206		0.348561	-0.348561	2.39091	0.418251	0.201569		1.91807e-05	0.000646055	0.201892	0.0701963
						0.0674015	0.266196	2.4014	0.416424	0.159875		2.24583e-05	0.000515794	0.160133	0.102949		-0.15518	0.259022	2.41777	0.413605	0.161507		1.14771e-05	0.00054462	0.16178	0.049826		-0.259026	0.173333	2.41642	0.413835	0.16857		1.15274e-05	0.000640647	0.16889	0.0425435		0.349018	-0.349018	2.3908	0.41827	0.202215		1.91807e-05	0.000646055	0.202538	0.0701963
						0.0678584	0.265956	2.40127	0.416446	0.160391		2.24101e-05	0.000514594	0.160648	0.102967		-0.155476	0.258566	2.4177	0.413616	0.162052		1.14838e-05	0.000544959	0.162324	0.0498245		-0.258577	0.173789	2.41635	0.413846	0.16921		1.10865e-05	0.000637858	0.169529	0.041095		0.349475	-0.349475	2.39069	0.418289	0.202861		1.91807e-05	0.000646055	0.203184	0.0701963
						0.0683152	0.265719	2.40114	0.416468	0.160906		2.23621e-05	0.000513407	0.161162	0.102984		-0.155773	0.258109	2.41763	0.413628	0.162597		1.20506e-05	0.000545298	0.162869	0.0522508		-0.258132	0.174246	2.41629	0.413858	0.169848		1.10375e-05	0.000635054	0.170166	0.041094		0.349931	-0.349931	2.39058	0.418308	0.203507		1.91807e-05	0.000646055	0.20383	0.0701963
						0.068772	0.265485	2.40101	0.416491	0.161419		2.23143e-05	0.000512236	0.161675	0.102999		-0.156071	0.257652	2.41756	0.41364	0.163142		1.20684e-05	0.000545596	0.163415	0.0522994		-0.257691	0.174703	2.41623	0.413869	0.170483		1.0988e-05	0.000632236	0.170799	0.0410921		0.350388	-0.350388	2.39047	0.418327	0.204153		1.91807e-05	0.000646055	0.204476	0.0701963
						0.0692289	0.265253	2.40088	0.416513	0.161931		2.22666e-05	0.000511078	0.162187	0.103012		-0.156369	0.257195	2.41749	0.413652	0.163688		1.14435e-05	0.000545894	0.163961	0.0495645		-0.257254	0.17516	2.41616	0.41388	0.171115		1.0938e-05	0.000629403	0.17143	0.0410892		0.350845	-0.350845	2.39036	0.418347	0.204799		1.91807e-05	0.000646055	0.205122	0.0701963
						0.0696857	0.265024	2.40076	0.416535	0.162442		2.22191e-05	0.000509935	0.162697	0.103022		-0.156668	0.256738	2.41742	0.413663	0.164234		1.09774e-05	0.000546191	0.164507	0.0475196		-0.256821	0.175617	2.4161	0.413891	0.171745		1.1098e-05	0.000626557	0.172058	0.0418798		0.351302	-0.351302	2.39025	0.418366	0.205445		1.91807e-05	0.000646055	0.205768	0.0701963
						0.0701425	0.264798	2.40063	0.416558	0.162952		2.1728e-05	0.000508806	0.163207	0.100969		-0.156968	0.256281	2.41736	0.413674	0.16478		1.11145e-05	0.000546489	0.165053	0.0480869		-0.256392	0.176074	2.41603	0.413902	0.172371		1.05075e-05	0.000623738	0.172683	0.0398305		0.351759	-0.351759	2.39014	0.418385	0.206091		1.90083e-05	0.000646055	0.206414	0.0695653
						0.0705994	0.264574	2.4005	0.416579	0.163461		2.13066e-05	0.000507709	0.163715	0.0992242		-0.157267	0.255825	2.4173	0.413686	0.165326		1.11212e-05	0.000546815	0.1656	0.0480874		-0.255967	0.17653	2.41597	0.413912	0.172995		1.0526e-05	0.000620972	0.173305	0.0400785		0.352216	-0.352216	2.39003	0.418404	0.206737		1.90083e-05	0.000646055	0.207061	0.0695653
						0.0710562	0.264352	2.40038	0.416601	0.163969		2.12609e-05	0.000506641	0.164222	0.0992205		-0.157568	0.255368	2.41723	0.413697	0.165873		1.1128e-05	0.000547141	0.166147	0.0480879		-0.255547	0.176987	2.41591	0.413923	0.173616		1.04797e-05	0.000618196	0.173925	0.0400812		0.352672	-0.352672	2.38993	0.418423	0.207384		1.90083e-05	0.000646055	0.207707	0.0695653
						0.071513	0.264133	2.40026	0.416622	0.164475		2.12154e-05	0.000505585	0.164728	0.0992149		-0.157869	0.254911	2.41717	0.413708	0.16642		1.11347e-05	0.000547468	0.166694	0.0480883		-0.25513	0.177444	2.41585	0.413933	0.174234		1.04328e-05	0.000615406	0.174542	0.040083		0.353129	-0.353129	2.38982	0.418442	0.20803		1.90083e-05	0.000646055	0.208353	0.0695653
						0.0719698	0.263916	2.40014	0.416643	0.164981		2.11701e-05	0.000504542	0.165233	0.0992074		-0.158171	0.254454	2.4171	0.413719	0.166968		1.11414e-05	0.000547794	0.167242	0.0480887		-0.254718	0.177901	2.41579	0.413944	0.17485		1.03855e-05	0.000612603	0.175156	0.0400837		0.353586	-0.353586	2.38971	0.418461	0.208676		1.90083e-05	0.000646055	0.208999	0.0695653
						0.0724267	0.263702	2.40001	0.416664	0.165486		2.11248e-05	0.000503512	0.165737	0.0991979		-0.158473	0.253997	2.41704	0.41373	0.167515		1.01612e-05	0.000548121	0.16779	0.0438317		-0.25431	0.178358	2.41573	0.413954	0.175462		9.93413e-06	0.000609786	0.175767	0.0385187		0.354043	-0.354043	2.3896	0.41848	0.209322		1.90083e-05	0.000646055	0.209645	0.0695653
						0.0728835	0.26349	2.39989	0.416685	0.165989		2.10797e-05	0.000502495	0.16624	0.0991866		-0.158776	0.25354	2.41698	0.41374	0.168064		1.01024e-05	0.000548448	0.168338	0.043552		-0.253906	0.178815	2.41567	0.413964	0.176072		9.08008e-06	0.000606956	0.176375	0.0353714		0.3545	-0.3545	2.38949	0.418499	0.209968		1.90083e-05	0.000646055	0.210291	0.0695653
						0.0733403	0.263281	2.39977	0.416706	0.166492		2.13649e-05	0.000501491	0.166742	0.100729		-0.159079	0.253084	2.41692	0.41375	0.168612		1.01083e-05	0.000548775	0.168886	0.0435514		-0.253506	0.179271	2.41562	0.413973	0.176679		9.03735e-06	0.000604114	0.176981	0.0353706		0.354957	-0.354957	2.38938	0.418518	0.210614		1.90083e-05	0.000646055	0.210937	0.0695653
						0.0737972	0.263074	2.39965	0.416728	0.166993		2.1433e-05	0.000500499	0.167243	0.101251		-0.159384	0.252627	2.41686	0.41376	0.169161		1.01142e-05	0.000549102	0.169435	0.0435508		-0.253111	0.179728	2.41556	0.413982	0.177283		8.99417e-06	0.000601259	0.177584	0.0353687		0.355413	-0.355413	2.38927	0.418537	0.21126		1.90083e-05	0.000646055	0.211583	0.0695653
						0.074254	0.26287	2.39952	0.416749	0.167494		2.13925e-05	0.00049952	0.167743	0.101258		-0.159688	0.25217	2.4168	0.413771	0.16971		1.012e-05	0.000549428	0.169985	0.0435502		-0.25272	0.180185	2.41551	0.413991	0.177884		8.95054e-06	0.000598394	0.178183	0.0353656		0.35587	-0.35587	2.38917	0.418556	0.211906		1.90083e-05	0.000646055	0.212229	0.0695653
						0.0747108	0.262668	2.3994	0.416771	0.167993		2.13522e-05	0.000498554	0.168242	0.101263		-0.159993	0.251713	2.41674	0.413781	0.170259		1.01259e-05	0.000549754	0.170534	0.0435495		-0.252333	0.180642	2.41546	0.414	0.178483		9.21908e-06	0.000595517	0.17878	0.0366027		0.356327	-0.356327	2.38906	0.418575	0.212552		1.90083e-05	0.000646055	0.212875	0.0695653
						0.0751676	0.262468	2.39928	0.416792	0.168492		2.0848e-05	0.0004976	0.16874	0.0990613		-0.160299	0.251256	2.41668	0.413791	0.170809		9.92666e-06	0.00055008	0.171084	0.0426675		-0.251951	0.181099	2.41541	0.414009	0.179078		9.12592e-06	0.000592663	0.179375	0.0364072		0.356784	-0.356784	2.38895	0.418594	0.213198		1.87672e-05	0.000646055	0.213521	0.068683
						0.0756245	0.262271	2.39916	0.416813	0.168989		2.04166e-05	0.000496675	0.169238	0.0971918		-0.160606	0.250799	2.41662	0.413801	0.171359		9.45484e-06	0.000550433	0.171634	0.0406133		-0.251574	0.181556	2.41535	0.414018	0.179671		8.41593e-06	0.000589842	0.179966	0.0337354		0.357241	-0.357241	2.38884	0.418613	0.213844		1.87672e-05	0.000646055	0.214167	0.068683
						0.0760813	0.262076	2.39904	0.416833	0.169486		2.03778e-05	0.000495774	0.169734	0.0971836		-0.160913	0.250343	2.41657	0.41381	0.17191		9.79896e-06	0.00055077	0.172185	0.0420658		-0.251201	0.182012	2.4153	0.414027	0.180261		8.58084e-06	0.000587012	0.180554	0.0345622		0.357698	-0.357698	2.38873	0.418632	0.21449		1.87672e-05	0.000646055	0.214813	0.068683
						0.0765381	0.261883	2.39892	0.416854	0.169982		2.03392e-05	0.000494885	0.170229	0.0971736		-0.16122	0.249886	2.41651	0.41382	0.17246		9.80466e-06	0.000551077	0.172736	0.0420668		-0.250832	0.182469	2.41525	0.414035	0.180848		8.53986e-06	0.000584195	0.18114	0.034563		0.358154	-0.358154	2.38863	0.41865	0.215136		1.87672e-05	0.000646055	0.215459	0.068683
						0.076995	0.261693	2.39881	0.416874	0.170477		2.03007e-05	0.000494007	0.170724	0.0971618		-0.161529	0.249429	2.41645	0.41383	0.173011		9.81033e-06	0.000551383	0.173287	0.0420678		-0.250468	0.182926	2.4152	0.414044	0.181432		8.49843e-06	0.000581369	0.181723	0.0345626		0.358611	-0.358611	2.38852	0.418669	0.215782		1.87672e-05	0.000646055	0.216105	0.068683
						0.0774518	0.261505	2.39869	0.416894	0.170971		2.02622e-05	0.000493141	0.171217	0.0971483		-0.161837	0.248972	2.4164	0.41384	0.173563		9.81597e-06	0.000551688	0.173839	0.0420687		-0.250108	0.183383	2.41515	0.414052	0.182013		8.45654e-06	0.000578533	0.182303	0.0345608		0.359068	-0.359068	2.38841	0.418688	0.216428		1.87672e-05	0.000646055	0.216751	0.068683
						0.0779086	0.261319	2.39857	0.416915	0.171464		1.96418e-05	0.000492286	0.17171	0.0943372		-0.162147	0.248515	2.41634	0.413849	0.174115		9.82158e-06	0.000551991	0.174391	0.0420696		-0.249753	0.18384	2.4151	0.414061	0.182592		8.11456e-06	0.000575691	0.18288	0.0333269		0.359525	-0.359525	2.38831	0.418707	0.217074		1.87672e-05	0.000646055	0.217397	0.068683
						0.0783655	0.261136	2.39846	0.416934	0.171956		1.95684e-05	0.000491458	0.172202	0.0941432		-0.162457	0.248058	2.41628	0.413859	0.174667		9.04165e-06	0.000552293	0.174943	0.0387077		-0.249403	0.184297	2.41506	0.414069	0.183168		7.27957e-06	0.000572841	0.183454	0.0300463		0.359982	-0.359982	2.3882	0.418726	0.21772		1.87672e-05	0.000646055	0.218043	0.068683
						0.0788223	0.260955	2.39835	0.416954	0.172448		1.95387e-05	0.000490642	0.172693	0.0941562		-0.162767	0.247602	2.41623	0.413868	0.175219		8.81472e-06	0.000552593	0.175495	0.0377157		-0.249057	0.184753	2.41501	0.414076	0.18374		7.24278e-06	0.000569986	0.184025	0.0300442		0.360439	-0.360439	2.38809	0.418744	0.218366		1.87672e-05	0.000646055	0.218689	0.068683
						0.0792791	0.260776	2.39823	0.416973	0.172938		1.95089e-05	0.000489836	0.173183	0.0941676		-0.163078	0.247145	2.41618	0.413877	0.175771		8.81951e-06	0.000552892	0.176048	0.0377158		-0.248716	0.18521	2.41497	0.414083	0.18431		7.20559e-06	0.000567126	0.184594	0.0300406		0.360895	-0.360895	2.38799	0.418763	0.219013		1.87672e-05	0.000646055	0.219336	0.068683
						0.0797359	0.260599	2.39812	0.416993	0.173428		1.94793e-05	0.000489041	0.173673	0.0941773		-0.163389	0.246688	2.41612	0.413886	0.176324		8.82427e-06	0.000553188	0.176601	0.037716		-0.24838	0.185667	2.41493	0.414091	0.184877		7.46134e-06	0.000564262	0.18516	0.0312647		0.361352	-0.361352	2.38788	0.418782	0.219659		1.87672e-05	0.000646055	0.219982	0.068683
						0.0801928	0.260424	2.39801	0.417012	0.173917		1.90059e-05	0.000488257	0.174161	0.0920365		-0.163701	0.246231	2.41607	0.413895	0.176878		9.00328e-06	0.000553482	0.177154	0.0384606		-0.248049	0.186124	2.41489	0.414098	0.185442		7.82046e-06	0.000561421	0.185722	0.0329354		0.361809	-0.361809	2.38777	0.418801	0.220305		1.84565e-05	0.000646055	0.220628	0.0675459
						0.0806496	0.260252	2.3979	0.417031	0.174405		1.86019e-05	0.000487497	0.174649	0.0902206		-0.164014	0.245774	2.41602	0.413904	0.177431		9.00841e-06	0.000553802	0.177708	0.0384603		-0.247723	0.186581	2.41484	0.414106	0.186003		7.78282e-06	0.000558609	0.186282	0.0329419		0.362266	-0.362266	2.38767	0.418819	0.220951		1.84565e-05	0.000646055	0.221274	0.0675459
						0.0811064	0.260082	2.39779	0.41705	0.174893		1.85734e-05	0.000486758	0.175136	0.0902192		-0.164327	0.245317	2.41597	0.413913	0.177985		8.78407e-06	0.00055412	0.178262	0.037481		-0.247401	0.187037	2.4148	0.414114	0.186562		6.7734e-06	0.000555793	0.18684	0.0288146		0.362723	-0.362723	2.38756	0.418837	0.221597		1.84565e-05	0.000646055	0.22192	0.0675459
						0.0815633	0.259914	2.39769	0.417068	0.17538		1.86388e-05	0.000486028	0.175623	0.0906725		-0.16464	0.244861	2.41592	0.413921	0.178539		8.04532e-06	0.000554436	0.178816	0.0343092		-0.247085	0.187494	2.41476	0.41412	0.187118		6.65653e-06	0.000552975	0.187394	0.0284618		0.36318	-0.36318	2.38746	0.418856	0.222243		1.84565e-05	0.000646055	0.222566	0.0675459
						0.0820201	0.259748	2.39758	0.417087	0.175866		1.89795e-05	0.000485308	0.176108	0.0924668		-0.164955	0.244404	2.41587	0.41393	0.179093		8.04962e-06	0.00055475	0.179371	0.0343082		-0.246773	0.187951	2.41472	0.414127	0.187671		6.62446e-06	0.000550156	0.187946	0.0284698		0.363636	-0.363636	2.38735	0.418874	0.222889		1.84565e-05	0.000646055	0.223212	0.0675459
						0.0824769	0.259584	2.39747	0.417106	0.176351		1.89545e-05	0.000484598	0.176593	0.0924804		-0.165269	0.243947	2.41582	0.413938	0.179648		8.05389e-06	0.000555061	0.179926	0.0343071		-0.246467	0.188408	2.41468	0.414134	0.188221		6.63884e-06	0.000547338	0.188494	0.0286785		0.364093	-0.364093	2.38725	0.418893	0.223535		1.84565e-05	0.000646055	0.223858	0.0675459
						0.0829338	0.259422	2.39736	0.417125	0.176835		1.89295e-05	0.000483897	0.177077	0.0924925		-0.165585	0.24349	2.41578	0.413946	0.180203		8.17149e-06	0.000555369	0.180481	0.0347887		-0.246165	0.188865	2.41464	0.41414	0.188768		6.76946e-06	0.000544529	0.18904	0.0293936		0.36455	-0.36455	2.38714	0.418911	0.224181		1.84565e-05	0.000646055	0.224504	0.0675459
						0.0833906	0.259263	2.39725	0.417144	0.177319		1.89046e-05	0.000483206	0.177561	0.0925029		-0.1659	0.243033	2.41573	0.413954	0.180759		8.56544e-06	0.000555663	0.181036	0.0364466		-0.245869	0.189322	2.4146	0.414147	0.189313		6.73305e-06	0.000541749	0.189583	0.0293855		0.365007	-0.365007	2.38703	0.41893	0.224827		1.84565e-05	0.000646055	0.22515	0.0675459
						0.0838474	0.259105	2.39715	0.417163	0.177803		1.88798e-05	0.000482524	0.178044	0.0925119		-0.166217	0.242577	2.41568	0.413962	0.181314		8.56957e-06	0.000555915	0.181592	0.0364477		-0.245578	0.189778	2.41456	0.414154	0.189854		6.40614e-06	0.000538976	0.190124	0.0281026		0.365464	-0.365464	2.38693	0.418948	0.225473		1.84565e-05	0.000646055	0.225796	0.0675459
						0.0843042	0.25895	2.39704	0.417182	0.178285		1.8855e-05	0.000481852	0.178526	0.0925192		-0.166534	0.24212	2.41563	0.413971	0.18187		7.85282e-06	0.000556162	0.182148	0.0333844		-0.245292	0.190235	2.41452	0.41416	0.190393		5.68676e-06	0.00053621	0.190661	0.0250755		0.365921	-0.365921	2.38682	0.418967	0.226119		1.84565e-05	0.000646055	0.226442	0.0675459
						0.0847611	0.258797	2.39693	0.417201	0.178767		1.88302e-05	0.000481189	0.179008	0.092525		-0.166851	0.241663	2.41558	0.413979	0.182426		7.58914e-06	0.000556404	0.182704	0.0322494		-0.245011	0.190692	2.41449	0.414166	0.190929		5.93192e-06	0.000533454	0.191196	0.0262916		0.366377	-0.366377	2.38672	0.418985	0.226765		1.84565e-05	0.000646055	0.227088	0.0675459
						0.0852179	0.258646	2.39682	0.417219	0.179248		1.83488e-05	0.000480536	0.179488	0.0902821		-0.167168	0.241206	2.41554	0.413986	0.182983		7.80343e-06	0.000556641	0.183261	0.0331459		-0.244735	0.191149	2.41446	0.414172	0.191463		6.27419e-06	0.000530726	0.191728	0.0279516		0.366834	-0.366834	2.38661	0.419004	0.227411		1.80732e-05	0.000646055	0.227734	0.0661431
						0.0856747	0.258496	2.39671	0.417238	0.179729		1.79387e-05	0.000479904	0.179969	0.0883803		-0.167486	0.240749	2.41549	0.413994	0.183539		7.8071e-06	0.0005569	0.183818	0.0331461		-0.244465	0.191606	2.41442	0.414178	0.191994		6.24343e-06	0.000528031	0.192258	0.0279565		0.367291	-0.367291	2.38651	0.419022	0.228057		1.80732e-05	0.000646055	0.22838	0.0661431
						0.0861316	0.258349	2.39661	0.417256	0.180209		1.79149e-05	0.00047929	0.180448	0.0883761		-0.167805	0.240292	2.41545	0.414002	0.184096		7.8107e-06	0.000557154	0.184375	0.0331462		-0.2442	0.192063	2.41438	0.414184	0.192522		6.21235e-06	0.000525348	0.192784	0.0279594		0.367748	-0.367748	2.38641	0.41904	0.228703		1.80732e-05	0.000646055	0.229026	0.0661431
						0.0865884	0.258204	2.39651	0.417274	0.180688		1.78911e-05	0.000478686	0.180927	0.0883704		-0.168124	0.239836	2.4154	0.41401	0.184653		7.81421e-06	0.000557402	0.184932	0.0331463		-0.243941	0.192519	2.41435	0.414191	0.193047		6.18094e-06	0.000522679	0.193308	0.0279601		0.368205	-0.368205	2.38631	0.419058	0.229349		1.80732e-05	0.000646055	0.229672	0.0661431
						0.0870452	0.258061	2.39641	0.417292	0.181167		1.78674e-05	0.00047809	0.181406	0.0883633		-0.168443	0.239379	2.41536	0.414018	0.185211		7.58239e-06	0.000557645	0.18549	0.032149		-0.243687	0.192976	2.41431	0.414197	0.19357		5.82323e-06	0.000520027	0.19383	0.0264763		0.368661	-0.368661	2.3862	0.419076	0.229995		1.80732e-05	0.000646055	0.230318	0.0661431
						0.087502	0.25792	2.3963	0.417309	0.181645		1.78438e-05	0.000477502	0.181883	0.0883548		-0.168763	0.238922	2.41531	0.414025	0.185768		6.87345e-06	0.000557882	0.186047	0.0291307		-0.243439	0.193433	2.41428	0.414203	0.19409		5.18914e-06	0.000517393	0.194348	0.0237134		0.369118	-0.369118	2.3861	0.419094	0.230641		1.80732e-05	0.000646055	0.230965	0.0661431
						0.0879589	0.257781	2.3962	0.417327	0.182122		1.78201e-05	0.000476923	0.182361	0.0883448		-0.169083	0.238465	2.41527	0.414032	0.186326		6.87621e-06	0.000558112	0.186605	0.0291304		-0.243196	0.19389	2.41425	0.414208	0.194607		5.16422e-06	0.000514781	0.194865	0.0237193		0.369575	-0.369575	2.386	0.419112	0.231288		1.80732e-05	0.000646055	0.231611	0.0661431
						0.0884157	0.257645	2.3961	0.417345	0.182599		1.77965e-05	0.000476353	0.182837	0.0883334		-0.169404	0.238008	2.41523	0.414039	0.186884		6.87888e-06	0.000558335	0.187164	0.0291301		-0.242958	0.194347	2.41422	0.414213	0.195122		5.13905e-06	0.000512193	0.195378	0.023723		0.370032	-0.370032	2.38589	0.41913	0.231934		1.80732e-05	0.000646055	0.232257	0.0661431
						0.0888725	0.25751	2.396	0.417363	0.183075		1.77729e-05	0.000475791	0.183313	0.0883206		-0.169725	0.237551	2.41519	0.414046	0.187443		6.88145e-06	0.000558551	0.187722	0.0291298		-0.242727	0.194804	2.41419	0.414218	0.195634		5.11365e-06	0.000509631	0.195889	0.0237244		0.370489	-0.370489	2.38579	0.419148	0.23258		1.80732e-05	0.000646055	0.232903	0.0661431
						0.0893294	0.257377	2.39589	0.417381	0.183551		1.82095e-05	0.000475238	0.183789	0.0905954		-0.170046	0.237095	2.41515	0.414053	0.188001		6.88393e-06	0.000558758	0.188281	0.0291294		-0.242501	0.19526	2.41416	0.414223	0.196144		5.08801e-06	0.000507097	0.196397	0.0237234		0.370946	-0.370946	2.38569	0.419166	0.233226		1.80732e-05	0.000646055	0.233549	0.0661431
						0.0897862	0.257246	2.39579	0.417399	0.184026		1.82319e-05	0.000474693	0.184264	0.0908109		-0.170368	0.236638	2.41511	0.41406	0.18856		6.88631e-06	0.000558957	0.18884	0.0291291		-0.242281	0.195717	2.41413	0.414228	0.196651		5.33131e-06	0.000504596	0.196903	0.024981		0.371402	-0.371402	2.38559	0.419184	0.233872		1.80732e-05	0.000646055	0.234195	0.0661431
						0.090243	0.257117	2.39569	0.417417	0.184501		1.77448e-05	0.000474157	0.184738	0.0884845		-0.17069	0.236181	2.41507	0.414066	0.189119		6.60969e-06	0.000559147	0.189399	0.0279495		-0.242066	0.196174	2.4141	0.414234	0.197155		5.66939e-06	0.000502136	0.197407	0.0266953		0.371859	-0.371859	2.38548	0.419202	0.234518		1.76102e-05	0.000646055	0.234841	0.0644488
						0.0906999	0.25699	2.39558	0.417435	0.184975		1.73304e-05	0.000473639	0.185212	0.0865126		-0.171013	0.235724	2.41503	0.414073	0.189678		6.65349e-06	0.000559328	0.189958	0.0281256		-0.241858	0.196631	2.41406	0.414239	0.197658		4.76521e-06	0.000499723	0.197907	0.0225462		0.372316	-0.372316	2.38538	0.41922	0.235164		1.76102e-05	0.000646055	0.235487	0.0644488
						0.0911567	0.256864	2.39548	0.417452	0.185449		1.73107e-05	0.000473138	0.185686	0.0865061		-0.171335	0.235267	2.41499	0.41408	0.190237		6.65524e-06	0.000559469	0.190517	0.0281259		-0.241655	0.197088	2.41404	0.414244	0.198157		4.7455e-06	0.000497346	0.198406	0.0225602		0.372773	-0.372773	2.38528	0.419238	0.23581		1.76102e-05	0.000646055	0.236133	0.0644488
						0.0916135	0.256741	2.39538	0.417469	0.185922		1.72912e-05	0.000472645	0.186158	0.0864984		-0.171658	0.23481	2.41495	0.414086	0.190797		6.65685e-06	0.0005596	0.191077	0.0281262		-0.241459	0.197545	2.41401	0.414249	0.198655		4.7269e-06	0.000495009	0.198902	0.0225779		0.37323	-0.37323	2.38518	0.419255	0.236456		1.76102e-05	0.000646055	0.236779	0.0644488
						0.0920703	0.25662	2.39529	0.417487	0.186395		1.72716e-05	0.00047216	0.186631	0.0864893		-0.171981	0.234354	2.41492	0.414093	0.191357		6.65831e-06	0.000559718	0.191636	0.0281264		-0.241268	0.198001	2.41398	0.414254	0.19915		4.80818e-06	0.000492715	0.199396	0.023073		0.373687	-0.373687	2.38508	0.419273	0.237102		1.76102e-05	0.000646055	0.237425	0.0644488
						0.0925272	0.256501	2.39519	0.417504	0.186867		1.7252e-05	0.000471682	0.187103	0.086479		-0.172305	0.233897	2.41488	0.4141	0.191916		6.65961e-06	0.000559824	0.192196	0.0281266		-0.241084	0.198458	2.41395	0.414258	0.199642		4.83523e-06	0.000490481	0.199888	0.0233085		0.374143	-0.374143	2.38498	0.41929	0.237748		1.76102e-05	0.000646055	0.238071	0.0644488
						0.092984	0.256383	2.39509	0.417521	0.187339		1.7195e-05	0.000471212	0.187574	0.0862792		-0.172628	0.23344	2.41484	0.414106	0.192476		6.34052e-06	0.000559916	0.192756	0.0267745		-0.240905	0.198915	2.41392	0.414263	0.200133		4.81139e-06	0.000488301	0.200377	0.0232971		0.3746	-0.3746	2.38488	0.419308	0.238394		1.76102e-05	0.000646055	0.238717	0.0644488
						0.0934408	0.256268	2.39499	0.417538	0.18781		1.69001e-05	0.00047075	0.188045	0.0848828		-0.172952	0.232983	2.4148	0.414113	0.193036		5.7377e-06	0.000559994	0.193316	0.0242256		-0.240733	0.199372	2.4139	0.414268	0.200621		4.78738e-06	0.000486173	0.200864	0.0232823		0.375057	-0.375057	2.38478	0.419326	0.23904		1.76102e-05	0.000646055	0.239363	0.0644488
						0.0938977	0.256154	2.39489	0.417555	0.188281		1.68861e-05	0.0004703	0.188516	0.084893		-0.173276	0.232526	2.41477	0.414118	0.193596		5.73835e-06	0.000560056	0.193876	0.0242256		-0.240566	0.199829	2.41387	0.414273	0.201107		4.65899e-06	0.000484098	0.201349	0.022755		0.375514	-0.375514	2.38468	0.419343	0.239686		1.76102e-05	0.000646055	0.240009	0.0644488
						0.0943545	0.256042	2.3948	0.417572	0.188751		1.6872e-05	0.000469858	0.188986	0.084902		-0.1736	0.232069	2.41473	0.414124	0.194156		5.73883e-06	0.000560103	0.194436	0.0242256		-0.240406	0.200286	2.41384	0.414277	0.201591		3.94812e-06	0.00048208	0.201832	0.0193638		0.375971	-0.375971	2.38458	0.419361	0.240332		1.76102e-05	0.000646055	0.240655	0.0644488
						0.0948113	0.255933	2.3947	0.417589	0.189221		1.68579e-05	0.000469424	0.189455	0.0849097		-0.173924	0.231613	2.4147	0.41413	0.194716		5.73914e-06	0.000560133	0.194996	0.0242256		-0.240252	0.200742	2.41382	0.414281	0.202073		4.1855e-06	0.000480121	0.202314	0.0206118		0.376428	-0.376428	2.38448	0.419378	0.240978		1.76102e-05	0.000646055	0.241301	0.0644488
						0.0952682	0.255825	2.3946	0.417606	0.18969		1.64033e-05	0.000468997	0.189925	0.0826951		-0.174248	0.231156	2.41467	0.414136	0.195276		5.98693e-06	0.000560145	0.195556	0.025271		-0.240104	0.201199	2.41379	0.414286	0.202554		4.5123e-06	0.000478227	0.202793	0.0223092		0.376884	-0.376884	2.38438	0.419396	0.241624		1.70524e-05	0.000646055	0.241947	0.0624075
						0.095725	0.255718	2.39451	0.417622	0.190159		1.60679e-05	0.000468586	0.190393	0.0810755		-0.174572	0.230699	2.41463	0.414142	0.195836		5.98714e-06	0.000560166	0.196117	0.025271		-0.239963	0.201656	2.41377	0.41429	0.203032		4.49572e-06	0.000476399	0.20327	0.0223125		0.377341	-0.377341	2.38428	0.419413	0.24227		1.70524e-05	0.000646055	0.242594	0.0624075
						0.0961818	0.255614	2.39442	0.417638	0.190628		1.64879e-05	0.000468188	0.190862	0.0832655		-0.174897	0.230242	2.4146	0.414148	0.196397		5.17906e-06	0.000560167	0.196677	0.0218601		-0.239828	0.202113	2.41374	0.414295	0.203508		4.47904e-06	0.000474638	0.203746	0.0223122		0.377798	-0.377798	2.38419	0.41943	0.242917		1.70524e-05	0.000646055	0.24324	0.0624075
						0.0966386	0.255512	2.39432	0.417655	0.191096		1.64769e-05	0.000467798	0.19133	0.0832791		-0.175221	0.229785	2.41457	0.414153	0.196957		5.10035e-06	0.000560148	0.197237	0.0215286		-0.239699	0.20257	2.41372	0.414299	0.203983		4.46226e-06	0.000472945	0.204219	0.0223082		0.378255	-0.378255	2.38409	0.419447	0.243563		1.70524e-05	0.000646055	0.243886	0.0624075
						0.0970955	0.255411	2.39423	0.417671	0.191564		1.64659e-05	0.000467414	0.191797	0.0832916		-0.175545	0.229328	2.41454	0.414158	0.197517		5.10002e-06	0.000560108	0.197797	0.0215288		-0.239577	0.203027	2.41369	0.414304	0.204456		4.4454e-06	0.000471325	0.204691	0.0223002		0.378712	-0.378712	2.38399	0.419464	0.244209		1.70524e-05	0.000646055	0.244532	0.0624075
						0.0975523	0.255312	2.39413	0.417688	0.192031		1.64548e-05	0.000467038	0.192265	0.083303		-0.175869	0.228872	2.41451	0.414163	0.198077		5.51589e-06	0.000560045	0.198357	0.0232869		-0.239461	0.203483	2.41366	0.414308	0.204927		4.42845e-06	0.000469779	0.205162	0.0222883		0.379169	-0.379169	2.3839	0.419481	0.244855		1.70524e-05	0.000646055	0.245178	0.0624075
						0.0980091	0.255215	2.39404	0.417704	0.192498		1.64438e-05	0.000466667	0.192731	0.0833131		-0.176193	0.228415	2.41448	0.414169	0.198637		5.52817e-06	0.000559897	0.198917	0.0233449		-0.239351	0.20394	2.41364	0.414312	0.205397		3.98751e-06	0.000468311	0.205631	0.020132		0.379625	-0.379625	2.3838	0.419498	0.245501		1.70524e-05	0.000646055	0.245824	0.0624075
						0.098466	0.25512	2.39394	0.417721	0.192965		1.64328e-05	0.000466304	0.193198	0.0833221		-0.176517	0.227958	2.41444	0.414174	0.199197		5.52628e-06	0.000559719	0.199477	0.0233444		-0.239248	0.204397	2.41361	0.414316	0.205865		3.67234e-06	0.000466923	0.206099	0.0185959		0.380082	-0.380082	2.3837	0.419515	0.246147		1.70524e-05	0.000646055	0.24647	0.0624075
						0.0989228	0.255026	2.39385	0.417737	0.193431		1.64217e-05	0.000465948	0.193664	0.0833299		-0.17684	0.227501	2.41441	0.41418	0.199757		5.09702e-06	0.000559513	0.200036	0.021539		-0.239151	0.204854	2.41359	0.41432	0.206332		3.6637e-06	0.000465617	0.206565	0.0186042		0.380539	-0.380539	2.38361	0.419533	0.246793		1.70524e-05	0.000646055	0.247116	0.0624075
						0.0993796	0.254934	2.39376	0.417754	0.193897		1.64107e-05	0.000465598	0.19413	0.0833366		-0.177163	0.227044	2.41438	0.414185	0.200316		4.62198e-06	0.000559276	0.200596	0.0195399		-0.239061	0.205311	2.41357	0.414324	0.206798		3.65504e-06	0.000464395	0.20703	0.018609		0.380996	-0.380996	2.38351	0.41955	0.247439		1.70524e-05	0.000646055	0.247762	0.0624075
						0.0998364	0.254844	2.39366	0.41777	0.194363		1.63997e-05	0.000465255	0.194595	0.083342		-0.177486	0.226587	2.41435	0.414189	0.200875		4.61966e-06	0.000559007	0.201155	0.0195394		-0.238978	0.205767	2.41355	0.414327	0.207262		3.89449e-06	0.00046326	0.207494	0.0198767		0.381453	-0.381453	2.38341	0.419567	0.248085		1.70524e-05	0.000646055	0.248408	0.0624075
						0.100293	0.254756	2.39357	0.417786	0.194828		1.59432e-05	0.000464919	0.19506	0.0810808		-0.177808	0.226131	2.41433	0.414194	0.201434		4.89703e-06	0.000558703	0.201714	0.0207239		-0.238901	0.206224	2.41353	0.414331	0.207725		4.22142e-06	0.000462212	0.207957	0.0215942		0.38191	-0.38191	2.38331	0.419584	0.248731		1.63664e-05	0.000646055	0.249054	0.0598968
						0.10075	0.25467	2.39348	0.417802	0.195293		1.5556e-05	0.000464596	0.195525	0.0791664		-0.17813	0.225674	2.4143	0.414199	0.201993		4.89434e-06	0.000558393	0.202272	0.020724		-0.238831	0.206681	2.4135	0.414336	0.208188		4.21267e-06	0.000461252	0.208418	0.0215943		0.382366	-0.382366	2.38322	0.4196	0.249377		1.63664e-05	0.000646055	0.2497	0.0598968
						0.101207	0.254585	2.39339	0.417818	0.195757		1.55454e-05	0.000464286	0.19599	0.0791655		-0.178451	0.225217	2.41427	0.414204	0.202552		4.89133e-06	0.000558046	0.202831	0.0207241		-0.238767	0.207138	2.41348	0.41434	0.208649		4.20391e-06	0.000460383	0.208879	0.02159		0.382823	-0.382823	2.38313	0.419616	0.250023		1.63664e-05	0.000646055	0.250346	0.0598968
						0.101664	0.254502	2.3933	0.417834	0.196222		1.55348e-05	0.000463982	0.196454	0.0791635		-0.178771	0.22476	2.41424	0.414209	0.20311		4.87265e-06	0.00055766	0.203388	0.0206593		-0.23871	0.207595	2.41345	0.414344	0.209109		4.19512e-06	0.000459607	0.209339	0.0215813		0.38328	-0.38328	2.38304	0.419633	0.250669		1.63664e-05	0.000646055	0.250992	0.0598968
						0.102121	0.254421	2.39321	0.417849	0.196686		1.5703e-05	0.000463684	0.196918	0.080072		-0.179091	0.224303	2.41421	0.414213	0.203667		4.02266e-06	0.000557233	0.203946	0.0170685		-0.238659	0.208052	2.41343	0.414348	0.209569		4.12894e-06	0.000458926	0.209798	0.0212723		0.383737	-0.383737	2.38294	0.419649	0.251315		1.63664e-05	0.000646055	0.251638	0.0598968
						0.102577	0.254342	2.39312	0.417865	0.197149		1.60146e-05	0.000463393	0.197381	0.081712		-0.17941	0.223847	2.41419	0.414218	0.204225		4.01947e-06	0.000556762	0.204503	0.0170694		-0.238616	0.208508	2.41341	0.414352	0.210028		3.52816e-06	0.000458339	0.210257	0.0182004		0.384194	-0.384194	2.38285	0.419666	0.251961		1.63664e-05	0.000646055	0.252284	0.0598968
						0.103034	0.254264	2.39303	0.417881	0.197613		1.60063e-05	0.000463108	0.197844	0.08172		-0.179728	0.22339	2.41417	0.414222	0.204781		4.01596e-06	0.000556245	0.205059	0.0170704		-0.238578	0.208965	2.41338	0.414356	0.210486		3.5281e-06	0.000457848	0.210715	0.0182196		0.384651	-0.384651	2.38276	0.419682	0.252607		1.63664e-05	0.000646055	0.25293	0.0598968
						0.103491	0.254188	2.39294	0.417897	0.198076		1.5998e-05	0.000462828	0.198307	0.0817269		-0.180046	0.222933	2.41414	0.414226	0.205338		4.01211e-06	0.000555679	0.205615	0.0170714		-0.238548	0.209422	2.41336	0.414359	0.210944		3.52804e-06	0.000457453	0.211173	0.018235		0.385107	-0.385107	2.38266	0.419698	0.253253		1.63664e-05	0.000646055	0.253576	0.0598968
						0.103948	0.254114	2.39284	0.417913	0.198539		1.59897e-05	0.000462555	0.19877	0.0817327		-0.180362	0.222476	2.41412	0.41423	0.205893		4.0079e-06	0.000555061	0.206171	0.0170724		-0.238524	0.209879	2.41334	0.414363	0.211401		3.52798e-06	0.000457155	0.21163	0.0182466		0.385564	-0.385564	2.38257	0.419715	0.253899		1.63664e-05	0.000646055	0.254222	0.0598968
						0.104405	0.254041	2.39275	0.417929	0.199001		1.59814e-05	0.000462289	0.199232	0.0817374		-0.180677	0.222019	2.4141	0.414234	0.206448		4.11136e-06	0.000554389	0.206725	0.0175344		-0.238507	0.210336	2.41332	0.414366	0.211859		3.52792e-06	0.000456953	0.212087	0.0182544		0.386021	-0.386021	2.38248	0.419731	0.254546		1.63664e-05	0.000646055	0.254869	0.0598968
						0.104862	0.25397	2.39266	0.417945	0.199464		1.59731e-05	0.000462028	0.199695	0.0817411		-0.180991	0.221562	2.41407	0.414238	0.207003		3.93513e-06	0.00055364	0.207279	0.0168055		-0.238496	0.210793	2.4133	0.41437	0.212316		3.77047e-06	0.000456847	0.212544	0.0195139		0.386478	-0.386478	2.38239	0.419747	0.255192		1.63664e-05	0.000646055	0.255515	0.0598968
						0.105318	0.253901	2.39257	0.417961	0.199926		1.55167e-05	0.000461774	0.200156	0.0794491		-0.181304	0.221106	2.41405	0.414242	0.207556		3.82197e-06	0.000552777	0.207833	0.0163477		-0.238492	0.211249	2.41328	0.414374	0.212772		4.09857e-06	0.000456837	0.213001	0.0212124		0.386935	-0.386935	2.38229	0.419764	0.255838		1.54708e-05	0.000646055	0.256161	0.056619
						0.105775	0.253834	2.39248	0.417976	0.200387		1.51299e-05	0.000461532	0.200618	0.0775093		-0.181615	0.220649	2.41403	0.414245	0.208109		3.81561e-06	0.000551882	0.208385	0.016347		-0.238495	0.211706	2.41326	0.414378	0.213229		4.09852e-06	0.000456923	0.213458	0.0212081		0.387392	-0.387392	2.3822	0.419779	0.256484		1.54708e-05	0.000646055	0.256807	0.056619
						0.106232	0.253768	2.39239	0.417991	0.200849		1.5122e-05	0.0004613	0.20108	0.0775075		-0.181925	0.220192	2.41401	0.414249	0.208661		3.80876e-06	0.00055092	0.208936	0.0163461		-0.238504	0.212163	2.41323	0.414382	0.213686		4.09846e-06	0.000457105	0.213915	0.0211994		0.387848	-0.387848	2.38212	0.419795	0.25713		1.54708e-05	0.000646055	0.257453	0.056619
						0.106689	0.253704	2.39231	0.418006	0.20131		1.5114e-05	0.000461074	0.201541	0.0775048		-0.182233	0.219735	2.41398	0.414253	0.209212		3.80136e-06	0.000549885	0.209487	0.016345		-0.23852	0.21262	2.41321	0.414386	0.214143		4.0984e-06	0.000457381	0.214372	0.0211863		0.388305	-0.388305	2.38203	0.41981	0.257776		1.54708e-05	0.000646055	0.258099	0.056619
						0.107146	0.253642	2.39222	0.418022	0.201771		1.51061e-05	0.000460853	0.202002	0.077501		-0.182539	0.219278	2.41396	0.414257	0.209762		3.79338e-06	0.000548775	0.210036	0.0163437		-0.238542	0.213077	2.41319	0.41439	0.214601		3.98197e-06	0.00045775	0.21483	0.0205679		0.388762	-0.388762	2.38194	0.419826	0.258422		1.54708e-05	0.000646055	0.258745	0.056619
						0.107603	0.253581	2.39213	0.418037	0.202232		1.50981e-05	0.000460639	0.202462	0.0774963		-0.182843	0.218821	2.41394	0.414261	0.210311		3.7848e-06	0.000547586	0.210584	0.0163422		-0.238571	0.213534	2.41316	0.414394	0.215058		3.54035e-06	0.00045821	0.215288	0.0182684		0.389219	-0.389219	2.38185	0.419841	0.259068		1.54708e-05	0.000646055	0.259391	0.056619
						0.108059	0.253522	2.39205	0.418052	0.202693		1.53084e-05	0.00046043	0.202923	0.0786114		-0.183145	0.218365	2.41392	0.414264	0.210858		2.99785e-06	0.000546313	0.211131	0.0129744		-0.238607	0.21399	2.41314	0.414398	0.215517		3.5489e-06	0.00045876	0.215746	0.0182906		0.389676	-0.389676	2.38177	0.419857	0.259714		1.54708e-05	0.000646055	0.260037	0.056619
						0.108516	0.253464	2.39196	0.418067	0.203153		1.55924e-05	0.000460226	0.203383	0.0801054		-0.183445	0.217908	2.4139	0.414267	0.211404		2.94308e-06	0.000544952	0.211677	0.0127692		-0.238649	0.214447	2.41312	0.414401	0.215975		3.5574e-06	0.000459397	0.216205	0.018309		0.390132	-0.390132	2.38168	0.419872	0.26036		1.54708e-05	0.000646055	0.260683	0.056619
						0.108973	0.253409	2.39187	0.418083	0.203613		1.55866e-05	0.000460029	0.203843	0.0801096		-0.183742	0.217451	2.41388	0.41427	0.211949		2.93533e-06	0.000543499	0.212221	0.0127696		-0.238697	0.214904	2.4131	0.414405	0.216435		3.56585e-06	0.000460119	0.216665	0.0183236		0.390589	-0.390589	2.38159	0.419887	0.261006		1.54708e-05	0.000646055	0.261329	0.056619
						0.10943	0.253354	2.39178	0.418098	0.204073		1.55807e-05	0.000459837	0.204303	0.0801129		-0.184036	0.216994	2.41387	0.414273	0.212493		2.92701e-06	0.00054195	0.212764	0.0127698		-0.238752	0.215361	2.41308	0.414408	0.216895		3.57424e-06	0.000460924	0.217125	0.0183347		0.391046	-0.391046	2.3815	0.419903	0.261652		1.54708e-05	0.000646055	0.261975	0.056619
						0.109887	0.253302	2.39169	0.418114	0.204533		1.55748e-05	0.000459652	0.204763	0.0801151		-0.184328	0.216537	2.41385	0.414276	0.213035		2.91809e-06	0.000540299	0.213305	0.0127698		-0.238814	0.215818	2.41306	0.414412	0.217356		3.81977e-06	0.000461809	0.217587	0.0195566		0.391503	-0.391503	2.38141	0.419918	0.262298		1.54708e-05	0.000646055	0.262621	0.056619
						0.110344	0.253251	2.3916	0.418129	0.204993		1.51203e-05	0.000459471	0.205223	0.0778076		-0.184616	0.21608	2.41383	0.414279	0.213575		3.22284e-06	0.000538543	0.213844	0.0141494		-0.238881	0.216275	2.41304	0.414416	0.217818		4.14893e-06	0.000462776	0.218049	0.0211975		0.39196	-0.39196	2.38133	0.419934	0.262944		1.41148e-05	0.000646055	0.263267	0.0516563
						0.1108	0.253202	2.39152	0.418145	0.205452		1.47355e-05	0.000459301	0.205682	0.0758553		-0.184902	0.215624	2.41381	0.414282	0.214114		3.0367e-06	0.000536723	0.214382	0.0133774		-0.238955	0.216731	2.41301	0.41442	0.21828		4.15723e-06	0.000463827	0.218512	0.0211918		0.392417	-0.392417	2.38125	0.419948	0.26359		1.41148e-05	0.000646055	0.263913	0.0516563
						0.111257	0.253154	2.39143	0.418159	0.205912		1.47299e-05	0.00045914	0.206141	0.075853		-0.185183	0.215167	2.41379	0.414285	0.21465		2.42833e-06	0.000534793	0.214918	0.0107359		-0.239035	0.217188	2.41299	0.414424	0.218744		4.16547e-06	0.000464952	0.218977	0.0211824		0.392873	-0.392873	2.38117	0.419962	0.264236		1.41148e-05	0.000646055	0.264559	0.0516563
						0.111714	0.253108	2.39135	0.418174	0.206371		1.47242e-05	0.000458984	0.2066	0.0758498		-0.185461	0.21471	2.41378	0.414288	0.215185		2.42103e-06	0.00053275	0.215452	0.0107448		-0.239122	0.217645	2.41296	0.414428	0.219209		4.17364e-06	0.000466148	0.219442	0.0211695		0.39333	-0.39333	2.38109	0.419976	0.264882		1.41148e-05	0.000646055	0.265205	0.0516563
						0.112171	0.253064	2.39126	0.418189	0.20683		1.47186e-05	0.000458833	0.207059	0.0758457		-0.185735	0.214253	2.41377	0.41429	0.215718		2.49673e-06	0.000530589	0.215983	0.0111258		-0.239215	0.218102	2.41294	0.414432	0.219675		4.18174e-06	0.000467411	0.219909	0.0211533		0.393787	-0.393787	2.38101	0.41999	0.265528		1.41148e-05	0.000646055	0.265851	0.0516563
						0.112628	0.253021	2.39118	0.418203	0.207289		1.4713e-05	0.000458687	0.207518	0.0758407		-0.186005	0.213796	2.41375	0.414293	0.216249		2.69772e-06	0.000528286	0.216513	0.0120739		-0.239314	0.218559	2.41291	0.414437	0.220143		4.18976e-06	0.000468738	0.220377	0.0211338		0.394244	-0.394244	2.38093	0.420004	0.266175		1.41148e-05	0.000646055	0.266498	0.0516563
						0.113085	0.25298	2.3911	0.418218	0.207747		1.47073e-05	0.000458547	0.207977	0.0758348		-0.186271	0.213339	2.41374	0.414295	0.216777		2.68305e-06	0.000525805	0.21704	0.0120649		-0.239419	0.219016	2.41289	0.414441	0.220611		4.14002e-06	0.000470126	0.220847	0.0208213		0.394701	-0.394701	2.38085	0.420019	0.266821		1.41148e-05	0.000646055	0.267144	0.0516563
						0.113541	0.25294	2.39101	0.418233	0.208206		1.47823e-05	0.000458413	0.208435	0.0762438		-0.186531	0.212883	2.41372	0.414298	0.217303		2.66739e-06	0.000523198	0.217564	0.0120542		-0.23953	0.219472	2.41287	0.414445	0.221082		3.75212e-06	0.000471572	0.221317	0.0188126		0.395158	-0.395158	2.38077	0.420033	0.267467		1.41148e-05	0.000646055	0.26779	0.0516563
						0.113998	0.252902	2.39093	0.418248	0.208664		1.52093e-05	0.000458283	0.208893	0.0784684		-0.186786	0.212426	2.41371	0.414301	0.217826		2.44393e-06	0.000520462	0.218086	0.0111025		-0.239647	0.219929	2.41284	0.414449	0.221553		3.76776e-06	0.000473071	0.22179	0.0188312		0.395614	-0.395614	2.38069	0.420047	0.268113		1.41148e-05	0.000646055	0.268436	0.0516563
						0.114455	0.252866	2.39084	0.418263	0.209123		1.52056e-05	0.000458159	0.209352	0.0784705		-0.187035	0.211969	2.41369	0.414303	0.218346		1.87905e-06	0.000517598	0.218605	0.00858352		-0.23977	0.220386	2.41282	0.414452	0.222026		3.78323e-06	0.00047462	0.222264	0.0188467		0.396071	-0.396071	2.38061	0.420061	0.268759		1.41148e-05	0.000646055	0.269082	0.0516563
						0.114912	0.252831	2.39075	0.418278	0.209581		1.52019e-05	0.000458041	0.20981	0.0784717		-0.187279	0.211512	2.41368	0.414305	0.218864		1.86701e-06	0.000514607	0.219121	0.00857808		-0.239898	0.220843	2.4128	0.414456	0.222501		4.03043e-06	0.000476216	0.222739	0.0200109		0.396528	-0.396528	2.38053	0.420075	0.269405		1.41148e-05	0.000646055	0.269728	0.0516563
						0.115369	0.252797	2.39067	0.418293	0.210039		1.4751e-05	0.000457928	0.210268	0.076163		-0.187516	0.211055	2.41367	0.414307	0.219378		2.19936e-06	0.000511493	0.219634	0.0101666		-0.240033	0.2213	2.41278	0.41446	0.222977		4.35936e-06	0.000477868	0.223216	0.0215692		0.396985	-0.396985	2.38045	0.420089	0.270051		1.08635e-05	0.000646055	0.270374	0.0397577
						0.115825	0.252766	2.39058	0.418308	0.210497		1.43695e-05	0.000457823	0.210726	0.0742101		-0.187746	0.210598	2.41366	0.414309	0.21989		2.18602e-06	0.00050833	0.220144	0.0101678		-0.240173	0.221757	2.41275	0.414465	0.223455		4.37452e-06	0.000479578	0.223695	0.021567		0.397442	-0.397442	2.38039	0.4201	0.270697		1.08635e-05	0.000646055	0.27102	0.0397577
						0.116282	0.252736	2.3905	0.418322	0.210955		1.43659e-05	0.000457725	0.211183	0.0742077		-0.187969	0.210142	2.41364	0.414311	0.220398		2.17187e-06	0.000505062	0.220651	0.0101674		-0.240319	0.222213	2.41273	0.414469	0.223935		4.38949e-06	0.000481328	0.224175	0.0215622		0.397899	-0.397899	2.38032	0.420111	0.271343		1.08635e-05	0.000646055	0.271666	0.0397577
						0.116739	0.252707	2.39042	0.418337	0.211412		1.43624e-05	0.000457632	0.211641	0.0742044		-0.188184	0.209685	2.41363	0.414314	0.220903		2.15687e-06	0.000501699	0.221154	0.0101648		-0.240471	0.22267	2.4127	0.414473	0.224416		4.40427e-06	0.000483113	0.224657	0.0215548		0.398355	-0.398355	2.38026	0.420122	0.271989		1.08635e-05	0.000646055	0.272312	0.0397577
						0.117196	0.25268	2.39034	0.418351	0.21187		1.43588e-05	0.000457544	0.212099	0.0742002		-0.188391	0.209228	2.41362	0.414316	0.221405		2.14098e-06	0.000498253	0.221654	0.0101597		-0.240628	0.223127	2.41268	0.414478	0.224899		4.41884e-06	0.00048493	0.225141	0.0215451		0.398812	-0.398812	2.3802	0.420133	0.272635		1.08635e-05	0.000646055	0.272958	0.0397577
						0.117653	0.252654	2.39025	0.418366	0.212327		1.43553e-05	0.000457461	0.212556	0.0741952		-0.18859	0.208771	2.41361	0.414318	0.221903		1.53404e-06	0.00049474	0.222151	0.00733127		-0.24079	0.223584	2.41265	0.414482	0.225384		4.43321e-06	0.000486776	0.225627	0.0215332		0.399269	-0.399269	2.38014	0.420143	0.273281		1.08635e-05	0.000646055	0.273604	0.0397577
						0.11811	0.25263	2.39017	0.41838	0.212785		1.43517e-05	0.000457383	0.213014	0.0741894		-0.18878	0.208314	2.4136	0.414319	0.222398		1.44248e-06	0.000491179	0.222644	0.00694366		-0.240958	0.224041	2.41262	0.414487	0.225871		4.44737e-06	0.000488647	0.226115	0.0215193		0.399726	-0.399726	2.38008	0.420154	0.273927		1.08635e-05	0.000646055	0.27425	0.0397577
						0.118566	0.252608	2.39009	0.418394	0.213242		1.43481e-05	0.00045731	0.213471	0.0741828		-0.188961	0.207857	2.41359	0.414321	0.222889		1.43416e-06	0.000487593	0.223133	0.0069544		-0.241132	0.224498	2.4126	0.414491	0.226359		4.56729e-06	0.00049054	0.226605	0.0220142		0.400183	-0.400183	2.38002	0.420165	0.274573		1.08635e-05	0.000646055	0.274896	0.0397577
						0.119023	0.252587	2.39001	0.418409	0.2137		1.45643e-05	0.000457243	0.213928	0.0753117		-0.189131	0.207401	2.41358	0.414322	0.223377		1.4254e-06	0.000484011	0.223619	0.00696308		-0.241311	0.224954	2.41257	0.414496	0.22685		4.66114e-06	0.000492433	0.227096	0.0223802		0.40064	-0.40064	2.37995	0.420176	0.275219		1.08635e-05	0.000646055	0.275542	0.0397577
						0.11948	0.252567	2.38993	0.418423	0.214157		1.48535e-05	0.00045718	0.214385	0.0768176		-0.189291	0.206944	2.41357	0.414324	0.223861		1.41619e-06	0.000480463	0.224101	0.00696916		-0.241494	0.225411	2.41254	0.4145	0.227342		4.67951e-06	0.000494327	0.227589	0.0223823		0.401096	-0.401096	2.37989	0.420187	0.275865		1.08635e-05	0.000646055	0.276188	0.0397577
						0.119937	0.252549	2.38984	0.418438	0.214614		1.48517e-05	0.000457122	0.214843	0.0768181		-0.18944	0.206487	2.41356	0.414325	0.224341		1.40652e-06	0.000476988	0.22458	0.006972		-0.241683	0.225868	2.41252	0.414505	0.227837		4.93016e-06	0.000496232	0.228085	0.0234907		0.401553	-0.401553	2.37983	0.420198	0.276511		1.08635e-05	0.000646055	0.276834	0.0397577
						0.120394	0.252533	2.38976	0.418453	0.215071		1.4406e-05	0.00045707	0.2153	0.0745213		-0.189577	0.20603	2.41356	0.414327	0.224818		1.7452e-06	0.000473626	0.225055	0.00871221		-0.241877	0.226325	2.41249	0.41451	0.228333		5.2627e-06	0.000498165	0.228582	0.0249779		0.40201	-0.40201	2.37977	0.420209	0.277157		1.91686e-12	0.000645888	0.27748	7.017e-09
						0.120851	0.252518	2.38967	0.418467	0.215528		1.40291e-05	0.000457024	0.215757	0.0725789		-0.189702	0.205573	2.41355	0.414328	0.225292		1.73488e-06	0.000470501	0.225527	0.0087182		-0.242076	0.226782	2.41246	0.414515	0.228831		5.23319e-06	0.000500131	0.229081	0.0247401		0.402467	-0.402467	2.37977	0.420209	0.277803		0	0.000645888	0.278126	0
						0.121307	0.252505	2.38959	0.418481	0.215985		1.40274e-05	0.000456983	0.216214	0.0725765		-0.189815	0.205116	2.41354	0.41433	0.225762		1.39138e-06	0.000467578	0.225996	0.00703577		-0.242279	0.227238	2.41243	0.41452	0.229331		4.95673e-06	0.000502103	0.229582	0.0233411		0.40201	-0.40201	2.37977	0.420209	0.278449
						0.121764	0.252493	2.38951	0.418495	0.216442		1.40257e-05	0.000456947	0.216671	0.0725734		-0.189914	0.20466	2.41353	0.414331	0.22623		1.16552e-06	0.000464904	0.226462	0.00592754		-0.242488	0.227695	2.4124	0.414525	0.229833		4.98048e-06	0.000504078	0.230085	0.0233611
						0.122221	0.252483	2.38943	0.418509	0.216899		1.4024e-05	0.000456916	0.217128	0.0725694		-0.190001	0.204203	2.41352	0.414333	0.226695		1.16797e-06	0.000462531	0.226926	0.0059705		-0.242701	0.228152	2.41237	0.41453	0.230337		5.00381e-06	0.000506053	0.23059	0.0233789
						0.122678	0.252474	2.38935	0.418523	0.217356		1.40223e-05	0.00045689	0.217585	0.0725647		-0.190073	0.203746	2.41351	0.414334	0.227157		1.1705e-06	0.000460506	0.227388	0.00600974		-0.242919	0.228609	2.41234	0.414535	0.230843		5.02672e-06	0.000508027	0.231097	0.0233947
						0.123135	0.252466	2.38927	0.418537	0.217813		1.40205e-05	0.000456868	0.218041	0.0725593		-0.190131	0.203289	2.41351	0.414335	0.227618		1.1731e-06	0.000458881	0.227847	0.00604443		-0.243141	0.229066	2.41231	0.41454	0.231351		5.04922e-06	0.000509997	0.231606	0.0234086
						0.123592	0.252461	2.38919	0.418551	0.21827		1.40188e-05	0.000456851	0.218498	0.072553		-0.190174	0.202832	2.4135	0.414336	0.228077		1.17577e-06	0.000457701	0.228306	0.00607381		-0.243367	0.229523	2.41228	0.414545	0.231861		5.0713e-06	0.000511961	0.232117	0.0234208
						0.124048	0.252456	2.38911	0.418565	0.218727		1.40994e-05	0.000456839	0.218955	0.072972		-0.190203	0.202376	2.41349	0.414337	0.228535		1.1785e-06	0.000457009	0.228763	0.00609713		-0.243599	0.229979	2.41225	0.41455	0.232373		5.09298e-06	0.000513917	0.23263	0.0234314
						0.124505	0.252453	2.38903	0.418579	0.219184		1.45221e-05	0.000456832	0.219412	0.0751607		-0.190215	0.201919	2.41349	0.414338	0.228992		1.18128e-06	0.000456839	0.22922	0.00611378		-0.243834	0.230436	2.41222	0.414556	0.232887		5.11424e-06	0.000515865	0.233145	0.0234404
						0.124962	0.252452	2.38895	0.418594	0.21964		1.4522e-05	0.00045683	0.219869	0.0751607		-0.190213	0.201462	2.41348	0.41434	0.229448		1.1841e-06	0.000457221	0.229677	0.00612326		-0.244074	0.230893	2.41219	0.414561	0.233403		5.36215e-06	0.000517801	0.233662	0.0244847
						0.125419	0.252452	2.38887	0.418609	0.220097		1.40829e-05	0.000456832	0.220326	0.0728876		-0.190194	0.201005	2.41347	0.414341	0.229906		1.53946e-06	0.000458172	0.230135	0.00794436		-0.244317	0.23135	2.41216	0.414566	0.233921		5.68998e-06	0.000519749	0.234181	0.0258843
						0.125876	0.252453	2.38879	0.418623	0.220554		1.37118e-05	0.000456839	0.220782	0.0709659		-0.190159	0.200548	2.41346	0.414342	0.230364		1.47713e-06	0.000459637	0.230594	0.00759843		-0.244565	0.231807	2.41213	0.414572	0.234441		5.71063e-06	0.000521717	0.234702	0.0258802
						0.126333	0.252456	2.38871	0.418636	0.221011		1.37117e-05	0.00045685	0.221239	0.0709638		-0.190108	0.200091	2.41345	0.414344	0.230823		1.16431e-06	0.000461632	0.231054	0.00596334		-0.244817	0.232264	2.41209	0.414577	0.234962		5.73087e-06	0.00052367	0.235224	0.0258751
						0.126789	0.25246	2.38863	0.41865	0.221468		1.37116e-05	0.000456866	0.221696	0.070961		-0.190041	0.199635	2.41345	0.414345	0.231285		1.18232e-06	0.000464141	0.231517	0.0060229		-0.245073	0.23272	2.41206	0.414583	0.235486		5.75071e-06	0.000525607	0.235749	0.025869
						0.127246	0.252466	2.38855	0.418664	0.221925		1.37116e-05	0.000456887	0.222153	0.0709575		-0.189959	0.199178	2.41344	0.414346	0.231749		1.20022e-06	0.000467139	0.231983	0.00607484		-0.245333	0.233177	2.41203	0.414589	0.236012		5.77016e-06	0.000527527	0.236275	0.025862
						0.127703	0.252473	2.38847	0.418677	0.222381		1.37115e-05	0.000456911	0.22261	0.0709532		-0.189862	0.198721	2.41343	0.414347	0.232216		1.21794e-06	0.000470593	0.232452	0.00611926		-0.245597	0.233634	2.41199	0.414595	0.236539		5.78922e-06	0.000529429	0.236804	0.0258542
						0.12816	0.252482	2.3884	0.418691	0.222838		1.37114e-05	0.000456941	0.223067	0.0709483		-0.189749	0.198264	2.41343	0.414349	0.232687		1.23541e-06	0.000474464	0.232924	0.00615641		-0.245865	0.234091	2.41196	0.4146	0.237069		5.80789e-06	0.000531312	0.237334	0.0258457
						0.128617	0.252492	2.38832	0.418705	0.223295		1.37114e-05	0.000456975	0.223524	0.0709427		-0.189621	0.197807	2.41342	0.41435	0.233161		1.25258e-06	0.000478706	0.233401	0.00618668		-0.246136	0.234548	2.41193	0.414606	0.2376		6.0146e-06	0.000533175	0.237867	0.026672
						0.129074	0.252504	2.38824	0.418719	0.223752		1.38566e-05	0.000457013	0.223981	0.0716881		-0.189478	0.19735	2.41341	0.414351	0.23364		1.26941e-06	0.000483273	0.233882	0.00621053		-0.246411	0.235005	2.41189	0.414612	0.238133		6.13565e-06	0.000534976	0.238401	0.0271172
						0.12953	0.252517	2.38816	0.418732	0.224209		1.42092e-05	0.000457056	0.224438	0.0735056		-0.18932	0.196894	2.41341	0.414352	0.234123		1.28584e-06	0.000488112	0.234367	0.00622853		-0.246689	0.235461	2.41186	0.414618	0.238668		6.15612e-06	0.000536734	0.238936	0.0271186
						0.129987	0.252531	2.38808	0.418747	0.224666		1.42107e-05	0.000457104	0.224895	0.0735055		-0.189148	0.196437	2.4134	0.414354	0.234611		1.30183e-06	0.000493175	0.234858	0.00624128		-0.246971	0.235918	2.41182	0.414625	0.239205		6.402e-06	0.00053847	0.239474	0.0281108
						0.130444	0.252547	2.388	0.418761	0.225123		1.37795e-05	0.000457156	0.225352	0.0712668		-0.188962	0.19598	2.41339	0.414355	0.235105		1.67356e-06	0.000498411	0.235354	0.00793914		-0.247256	0.236375	2.41178	0.414631	0.239743		6.72741e-06	0.000540209	0.240013	0.0294446
						0.130901	0.252564	2.38792	0.418775	0.225581		1.34152e-05	0.000457212	0.225809	0.0693746		-0.188763	0.195523	2.41338	0.414357	0.235603		1.68769e-06	0.000503443	0.235855	0.00792616		-0.247544	0.236832	2.41174	0.414638	0.240284		6.74731e-06	0.000541961	0.240555	0.0294362
						0.131358	0.252583	2.38784	0.418788	0.226038		1.34166e-05	0.00045727	0.226266	0.0693729		-0.188551	0.195066	2.41337	0.414358	0.236107		1.7013e-06	0.000508522	0.236361	0.00791028		-0.247836	0.237289	2.4117	0.414644	0.240825		6.76679e-06	0.00054369	0.241097	0.0294273
						0.131815	0.252603	2.38777	0.418801	0.226495		1.3418e-05	0.000457332	0.226724	0.0693706		-0.188328	0.194609	2.41336	0.41436	0.236615		1.71438e-06	0.000513611	0.236872	0.0078921		-0.248131	0.237746	2.41167	0.414651	0.241369		6.78584e-06	0.000545394	0.241642	0.029418
						0.132271	0.252624	2.38769	0.418815	0.226952		1.34194e-05	0.000457399	0.227181	0.0693677		-0.188093	0.194153	2.41335	0.414362	0.237129		1.72693e-06	0.000518679	0.237388	0.00787217		-0.248429	0.238202	2.41163	0.414658	0.241915		6.80449e-06	0.000547074	0.242188	0.0294082
						0.132728	0.252647	2.38761	0.418828	0.22741		1.34208e-05	0.00045747	0.227639	0.0693641		-0.187848	0.193696	2.41334	0.414363	0.237647		1.73894e-06	0.000523697	0.237909	0.00785096		-0.24873	0.238659	2.41159	0.414665	0.242462		6.63664e-06	0.000548729	0.242736	0.0285963
						0.133185	0.252671	2.38754	0.418842	0.227867		1.34222e-05	0.000457546	0.228096	0.0693599		-0.187592	0.193239	2.41333	0.414365	0.238171		1.75042e-06	0.000528642	0.238435	0.00782887		-0.249034	0.239116	2.41155	0.414671	0.24301		6.63026e-06	0.00055036	0.243286	0.0284841
						0.133642	0.252697	2.38746	0.418855	0.228325		1.34236e-05	0.000457626	0.228554	0.069355		-0.187325	0.192782	2.41332	0.414367	0.2387		1.76138e-06	0.000533494	0.238966	0.00780624		-0.249341	0.239573	2.41151	0.414678	0.243561		6.65175e-06	0.000551966	0.243837	0.0284933
						0.134099	0.252724	2.38738	0.418869	0.228782		1.37983e-05	0.00045771	0.229011	0.071278		-0.18705	0.192325	2.41331	0.414369	0.239233		1.77183e-06	0.000538236	0.239502	0.00778337		-0.24965	0.24003	2.41147	0.414685	0.244113		6.67277e-06	0.000553546	0.244389	0.0285018
						0.134555	0.252752	2.3873	0.418882	0.22924		1.39133e-05	0.000457799	0.229469	0.0718578		-0.186765	0.191868	2.4133	0.41437	0.239771		1.70107e-06	0.000542855	0.240043	0.00740897		-0.249963	0.240487	2.41143	0.414691	0.244666		6.69334e-06	0.000555102	0.244944	0.0285095
						0.135012	0.252782	2.38723	0.418896	0.229698		1.39161e-05	0.000457892	0.229927	0.0718577		-0.186472	0.191412	2.41329	0.414372	0.240314		1.64478e-06	0.000547342	0.240588	0.00710507		-0.250278	0.240943	2.41139	0.414698	0.245221		6.93355e-06	0.000556632	0.2455	0.0294514
						0.135469	0.252813	2.38715	0.41891	0.230156		1.34939e-05	0.00045799	0.230385	0.0696627		-0.186171	0.190955	2.41328	0.414374	0.240862		2.07539e-06	0.000551687	0.241137	0.00889459		-0.250596	0.2414	2.41135	0.414705	0.245778		7.25128e-06	0.000558165	0.246057	0.0307165
						0.135926	0.252846	2.38707	0.418924	0.230614		1.31374e-05	0.000458089	0.230843	0.0678079		-0.185861	0.190498	2.41327	0.414376	0.241413		2.28656e-06	0.000555497	0.241691	0.00973243		-0.250917	0.241857	2.41131	0.414712	0.246336		7.27134e-06	0.000559708	0.246616	0.0307165
						0.136383	0.25288	2.38699	0.418937	0.231072		1.31401e-05	0.00045819	0.231301	0.0678068		-0.185545	0.190041	2.41325	0.414378	0.241969		2.3063e-06	0.000559409	0.242248	0.00974776		-0.25124	0.242314	2.41127	0.41472	0.246896		7.62083e-06	0.000561226	0.247176	0.0321059
						0.13684	0.252915	2.38692	0.41895	0.23153		1.31428e-05	0.000458295	0.231759	0.0678051		-0.185222	0.189584	2.41324	0.41438	0.242528		2.32504e-06	0.000563178	0.24281	0.00976124		-0.251566	0.242771	2.41122	0.414727	0.247457		7.65855e-06	0.00056265	0.247738	0.0321831
						0.137296	0.252952	2.38684	0.418963	0.231988		1.31455e-05	0.000458404	0.232218	0.0678029		-0.184893	0.189127	2.41323	0.414383	0.243091		2.34285e-06	0.000566804	0.243375	0.00977309		-0.251895	0.243228	2.41118	0.414735	0.24802		7.67896e-06	0.000564046	0.248302	0.032189
						0.137753	0.25299	2.38677	0.418976	0.232447		1.31482e-05	0.000458517	0.232676	0.0678001		-0.184558	0.188671	2.41321	0.414385	0.243658		2.35977e-06	0.000570288	0.243943	0.00978352		-0.252226	0.243684	2.41113	0.414742	0.248584		7.69891e-06	0.000565417	0.248866	0.0321943
						0.13821	0.253029	2.3867	0.418989	0.232905		1.31509e-05	0.000458635	0.233135	0.0677967		-0.184216	0.188214	2.4132	0.414387	0.244228		2.37584e-06	0.000573633	0.244515	0.00979269		-0.252559	0.244141	2.41109	0.41475	0.249149		7.71843e-06	0.000566765	0.249433	0.0321992
						0.138667	0.25307	2.38662	0.419003	0.233364		1.34138e-05	0.000458756	0.233593	0.0691337		-0.183869	0.187757	2.41319	0.41439	0.244802		2.3911e-06	0.000576842	0.24509	0.00980077		-0.252894	0.244598	2.41105	0.414758	0.249716		7.73752e-06	0.000568089	0.25	0.0322036
						0.139124	0.253112	2.38654	0.419016	0.233823		1.36286e-05	0.000458882	0.234052	0.0702212		-0.183517	0.1873	2.41317	0.414392	0.245379		2.4056e-06	0.000579919	0.245669	0.00980789		-0.253232	0.245055	2.411	0.414766	0.250284		7.75619e-06	0.00056939	0.250569	0.0322076
						0.139581	0.253155	2.38647	0.41903	0.234282		1.36326e-05	0.000459013	0.234511	0.0702219		-0.18316	0.186843	2.41316	0.414395	0.245959		2.41938e-06	0.000582867	0.24625	0.00981416		-0.253572	0.245512	2.41096	0.414773	0.250853		7.77445e-06	0.000570667	0.251139	0.0322112
						0.140037	0.2532	2.38639	0.419043	0.234741		1.36366e-05	0.000459147	0.23497	0.070222		-0.182798	0.186386	2.41314	0.414397	0.246542		2.43247e-06	0.000585691	0.246835	0.00981969		-0.253914	0.245969	2.41091	0.414781	0.251424		8.00937e-06	0.000571921	0.25171	0.0331117
						0.140494	0.253246	2.38631	0.419057	0.2352		1.32244e-05	0.000459286	0.235429	0.0680788		-0.182431	0.18593	2.41313	0.4144	0.247127		2.77918e-06	0.000588394	0.247422	0.0111678		-0.254258	0.246425	2.41086	0.414789	0.251996		8.32082e-06	0.000573179	0.252283	0.0343238
						0.140951	0.253293	2.38624	0.41907	0.235659		1.28766e-05	0.000459425	0.235889	0.0662681		-0.18206	0.185473	2.41311	0.414402	0.247716		2.78884e-06	0.000590506	0.248011	0.0111665		-0.254604	0.246882	2.41081	0.414797	0.252569		8.33877e-06	0.000574449	0.252856	0.0343218
						0.141408	0.253342	2.38616	0.419083	0.236119		1.28804e-05	0.000459564	0.236348	0.0662677		-0.181686	0.185016	2.4131	0.414405	0.248306		2.798e-06	0.000592519	0.248603	0.0111651		-0.254953	0.247339	2.41077	0.414806	0.253144		8.35632e-06	0.000575695	0.253431	0.0343196
						0.141865	0.253392	2.38609	0.419096	0.236578		1.28842e-05	0.000459708	0.236808	0.0662668		-0.181309	0.184559	2.41308	0.414408	0.248899		2.80668e-06	0.000594438	0.249196	0.0111636		-0.255303	0.247796	2.41072	0.414814	0.253719		8.37347e-06	0.000576918	0.254008	0.0343171
						0.142322	0.253443	2.38602	0.419109	0.237038		1.28881e-05	0.000459855	0.237268	0.0662653		-0.180929	0.184102	2.41307	0.414411	0.249493		3.08016e-06	0.000596267	0.249791	0.0122138		-0.255655	0.248253	2.41067	0.414823	0.254296		8.39024e-06	0.000578117	0.254585	0.0343145
						0.142778	0.253496	2.38594	0.419122	0.237498		1.28919e-05	0.000460006	0.237728	0.0662633		-0.180545	0.183646	2.41305	0.414414	0.25009		3.10978e-06	0.000598375	0.250389	0.0122878		-0.256009	0.248709	2.41062	0.414831	0.254874		8.49508e-06	0.000579294	0.255164	0.0346727
						0.143235	0.25355	2.38587	0.419135	0.237958		1.31733e-05	0.000460162	0.238188	0.0676865		-0.180159	0.183189	2.41303	0.414417	0.250688		3.12124e-06	0.00060042	0.250988	0.0122911		-0.256366	0.249166	2.41057	0.414839	0.255454		8.79813e-06	0.000580433	0.255744	0.0358392
						0.143692	0.253605	2.38579	0.419148	0.238418		1.33556e-05	0.000460322	0.238648	0.0685996		-0.179769	0.182732	2.41301	0.41442	0.251288		3.13217e-06	0.00060238	0.25159	0.012294		-0.256724	0.249623	2.41052	0.414848	0.256034		8.81465e-06	0.000581496	0.256325	0.0358408
						0.144149	0.253662	2.38572	0.419161	0.238878		1.33607e-05	0.000460486	0.239108	0.0686012		-0.179377	0.182275	2.41299	0.414423	0.251891		3.14261e-06	0.000604259	0.252193	0.0122967		-0.257084	0.25008	2.41047	0.414857	0.256616		8.83083e-06	0.00058254	0.256907	0.0358422
						0.144606	0.25372	2.38564	0.419174	0.239339		1.33658e-05	0.000460654	0.239569	0.0686022		-0.178981	0.181818	2.41297	0.414426	0.252495		3.15259e-06	0.000606062	0.252798	0.012299		-0.257445	0.250537	2.41042	0.414866	0.257198		8.84665e-06	0.000583564	0.25749	0.0358435
						0.145063	0.253779	2.38557	0.419188	0.239799		1.33708e-05	0.000460826	0.24003	0.0686027		-0.178583	0.181361	2.41296	0.414429	0.253101		3.16212e-06	0.000607791	0.253405	0.0123011		-0.257808	0.250994	2.41037	0.414875	0.257782		9.07476e-06	0.00058457	0.258074	0.0367044
						0.145519	0.25384	2.38549	0.419201	0.24026		1.29695e-05	0.000461003	0.240491	0.0665179		-0.178182	0.180905	2.41294	0.414433	0.253709		3.47886e-06	0.00060945	0.254014	0.0134964		-0.258173	0.25145	2.41031	0.414884	0.258366		9.37789e-06	0.000585581	0.258659	0.037865
						0.145976	0.253901	2.38542	0.419214	0.240721		1.2631e-05	0.000461178	0.240952	0.0647571		-0.177779	0.180448	2.41292	0.414436	0.254318		3.48513e-06	0.000610595	0.254624	0.0134953		-0.258539	0.251907	2.41026	0.414893	0.258952		9.3936e-06	0.000586606	0.259245	0.0378621
						0.146433	0.253965	2.38534	0.419227	0.241182		1.26358e-05	0.000461352	0.241413	0.0647574		-0.177373	0.179991	2.4129	0.41444	0.254929		3.49111e-06	0.00061169	0.255235	0.0134943		-0.258907	0.252364	2.4102	0.414903	0.259538		9.40897e-06	0.000587611	0.259832	0.0378592
						0.14689	0.254029	2.38527	0.419239	0.241644		1.26406e-05	0.00046153	0.241874	0.0647573		-0.176967	0.179534	2.41288	0.414443	0.255541		3.49681e-06	0.000612738	0.255847	0.0134933		-0.259277	0.252821	2.41015	0.414912	0.260126		9.424e-06	0.000588597	0.26042	0.0378561
						0.147347	0.254095	2.3852	0.419252	0.242105		1.26455e-05	0.000461712	0.242336	0.0647567		-0.176558	0.179077	2.41286	0.414447	0.256153		3.50227e-06	0.00061374	0.25646	0.0134922		-0.259648	0.253278	2.41009	0.414921	0.260715		9.4387e-06	0.000589564	0.261009	0.037853
						0.147804	0.254162	2.38513	0.419265	0.242567		1.30503e-05	0.000461898	0.242798	0.0668028		-0.176148	0.17862	2.41284	0.41445	0.256767		3.60412e-06	0.000614699	0.257074	0.013863		-0.260021	0.253735	2.41004	0.414931	0.261304		9.45309e-06	0.000590512	0.261599	0.0378498
						0.14826	0.25423	2.38505	0.419278	0.243029		1.30935e-05	0.000462088	0.24326	0.0669964		-0.175737	0.178164	2.41282	0.414454	0.257382		3.79358e-06	0.00061575	0.25769	0.0145668		-0.260395	0.254191	2.40999	0.41494	0.261895		9.46716e-06	0.000591442	0.26219	0.0378466
						0.148717	0.2543	2.38498	0.419291	0.243491		1.30995e-05	0.000462282	0.243722	0.0669989		-0.175324	0.177707	2.41279	0.414457	0.257997		3.80166e-06	0.000617009	0.258306	0.014568		-0.26077	0.254648	2.40993	0.41495	0.262486		9.48093e-06	0.000592354	0.262782	0.0378433
						0.149174	0.25437	2.3849	0.419304	0.243953		1.31055e-05	0.000462481	0.244184	0.0670008		-0.17491	0.17725	2.41277	0.414461	0.258614		3.80942e-06	0.000618222	0.258924	0.0145691		-0.261148	0.255105	2.40988	0.414959	0.263079		9.71995e-06	0.000593249	0.263375	0.0387388
						0.149631	0.254442	2.38483	0.419317	0.244416		1.31115e-05	0.000462683	0.244647	0.0670023		-0.174493	0.176793	2.41275	0.414465	0.259233		3.81689e-06	0.000619391	0.259542	0.0145701		-0.261526	0.255562	2.40982	0.414969	0.263672		9.89732e-06	0.000594088	0.263969	0.03939
						0.150088	0.254516	2.38476	0.41933	0.244878		1.31176e-05	0.00046289	0.24511	0.0670032		-0.174075	0.176336	2.41273	0.414469	0.259852		3.82407e-06	0.000620519	0.260162	0.014571		-0.261906	0.256019	2.40976	0.414979	0.264266		1.01173e-05	0.000594885	0.264563	0.0402117
						0.150545	0.25459	2.38468	0.419343	0.245341		1.27278e-05	0.000463101	0.245573	0.0649825		-0.173655	0.175879	2.4127	0.414473	0.260473		4.11119e-06	0.000621606	0.260783	0.0156376		-0.262287	0.256476	2.4097	0.414989	0.264861		1.04104e-05	0.00059569	0.265159	0.0413205
						0.151001	0.254666	2.38461	0.419356	0.245804		1.23991e-05	0.000463308	0.246036	0.0632762		-0.173233	0.175423	2.41268	0.414477	0.261094		4.11525e-06	0.000622246	0.261405	0.015637		-0.262669	0.256932	2.40964	0.414999	0.265456		1.04239e-05	0.000596509	0.265755	0.0413174
						0.151458	0.254744	2.38454	0.419368	0.246268		1.24049e-05	0.000463514	0.246499	0.0632773		-0.172811	0.174966	2.41266	0.414481	0.261716		4.11915e-06	0.000622861	0.262028	0.0156364		-0.263053	0.257389	2.40958	0.41501	0.266053		1.04372e-05	0.000597313	0.266352	0.0413144
						0.151915	0.254822	2.38447	0.419381	0.246731		1.25961e-05	0.000463723	0.246963	0.0642238		-0.172387	0.174509	2.41263	0.414485	0.262339		4.1229e-06	0.000623452	0.262651	0.0156357		-0.263438	0.257846	2.40952	0.41502	0.26665		1.04502e-05	0.000598102	0.266949	0.0413113
						0.152372	0.254902	2.3844	0.419393	0.247195		1.28349e-05	0.000463937	0.247427	0.0654111		-0.171963	0.174052	2.41261	0.414489	0.262963		4.12649e-06	0.000624021	0.263275	0.0156351		-0.263824	0.258303	2.40946	0.415031	0.267248		1.04629e-05	0.000598875	0.267548	0.0413082
						0.152829	0.254983	2.38432	0.419406	0.247659		1.28416e-05	0.000464154	0.247891	0.0654148		-0.171538	0.173595	2.41258	0.414493	0.263587		4.12995e-06	0.000624568	0.263899	0.0156345		-0.264211	0.25876	2.4094	0.415041	0.267847		1.04754e-05	0.000599634	0.268147	0.041305
						0.153286	0.255065	2.38425	0.419419	0.248123		1.28484e-05	0.000464376	0.248355	0.0654181		-0.171112	0.173138	2.41256	0.414497	0.264211		4.23771e-06	0.000625095	0.264524	0.0160289		-0.264599	0.259217	2.40934	0.415052	0.268447		1.04876e-05	0.000600379	0.268747	0.0413019
						0.153742	0.255148	2.38418	0.419432	0.248587		1.28552e-05	0.000464601	0.24882	0.0654209		-0.170685	0.172682	2.41254	0.414502	0.264836		4.40179e-06	0.000625745	0.265149	0.0166323		-0.264989	0.259673	2.40928	0.415062	0.269047		1.04996e-05	0.000601109	0.269348	0.0412987
						0.154199	0.255233	2.3841	0.419445	0.249052		1.2862e-05	0.00046483	0.249284	0.0654233		-0.170258	0.172225	2.41251	0.414506	0.265462		4.40787e-06	0.000626589	0.265775	0.0166328		-0.26538	0.26013	2.40922	0.415073	0.269648		1.05113e-05	0.000601826	0.269949	0.0412956
						0.154656	0.255319	2.38403	0.419458	0.249517		1.28688e-05	0.000465064	0.249749	0.0654253		-0.169829	0.171768	2.41248	0.41451	0.266089		4.41376e-06	0.000627407	0.266402	0.0166333		-0.265771	0.260587	2.40916	0.415083	0.27025		1.05227e-05	0.000602529	0.270551	0.0412924
						0.155113	0.255406	2.38396	0.419471	0.249982		1.28757e-05	0.000465302	0.250214	0.0654267		-0.169399	0.171311	2.41246	0.414515	0.266716		4.41946e-06	0.000628201	0.26703	0.0166337		-0.266164	0.261044	2.40909	0.415094	0.270853		1.09598e-05	0.000603219	0.271154	0.0429581
						0.15557	0.255494	2.38388	0.419483	0.250447		1.2498e-05	0.000465544	0.25068	0.0634746		-0.168968	0.170854	2.41243	0.414519	0.267344		4.67724e-06	0.00062897	0.267659	0.0175824		-0.266558	0.261501	2.40903	0.415105	0.271456		1.13665e-05	0.000603882	0.271758	0.0445034
						0.156026	0.255584	2.38381	0.419496	0.250913		1.22505e-05	0.000465781	0.251146	0.0621859		-0.168535	0.170397	2.41241	0.414524	0.267973		4.67991e-06	0.000629343	0.268288	0.017582		-0.266953	0.261958	2.40897	0.415116	0.27206		1.13334e-05	0.000604535	0.272362	0.0443258
						0.156483	0.255675	2.38374	0.419508	0.251378		1.25843e-05	0.000466015	0.251611	0.0638479		-0.168102	0.169941	2.41238	0.414529	0.268603		4.68249e-06	0.000629703	0.268918	0.0175817		-0.267349	0.262414	2.4089	0.415127	0.272664		1.13461e-05	0.000605176	0.272967	0.0443288
						0.15694	0.255767	2.38367	0.419521	0.251844		1.25916e-05	0.000466253	0.252078	0.0638528		-0.167669	0.169484	2.41235	0.414533	0.269232		4.68497e-06	0.00063005	0.269547	0.0175813		-0.267746	0.262871	2.40883	0.415139	0.27327		1.13587e-05	0.000605805	0.273572	0.0443316
						0.157397	0.25586	2.3836	0.419533	0.252311		1.25991e-05	0.000466495	0.252544	0.0638573		-0.167235	0.169027	2.41232	0.414538	0.269862		4.68738e-06	0.000630386	0.270178	0.017581		-0.268144	0.263328	2.40877	0.41515	0.273875		1.13709e-05	0.000606423	0.274179	0.0443343
						0.157854	0.255954	2.38353	0.419546	0.252777		1.26065e-05	0.00046674	0.253011	0.0638614		-0.166801	0.16857	2.4123	0.414543	0.270493		4.6897e-06	0.000630711	0.270808	0.0175806		-0.268543	0.263785	2.4087	0.415161	0.274482		1.1383e-05	0.000607029	0.274785	0.0443369
						0.158311	0.25605	2.38346	0.419559	0.253244		1.2614e-05	0.00046699	0.253477	0.0638651		-0.166366	0.168113	2.41227	0.414547	0.271124		4.69194e-06	0.000631026	0.271439	0.0175803		-0.268942	0.264242	2.40864	0.415173	0.275089		1.13948e-05	0.000607625	0.275393	0.0443393
						0.158767	0.256147	2.38339	0.419571	0.253711		1.26215e-05	0.000467243	0.253945	0.0638685		-0.165931	0.167656	2.41224	0.414552	0.271755		4.88017e-06	0.00063133	0.27207	0.0182767		-0.269343	0.264699	2.40857	0.415184	0.275696		1.14063e-05	0.000608209	0.276001	0.0443417
						0.159224	0.256245	2.38331	0.419584	0.254178		1.25484e-05	0.000467501	0.254412	0.0634635		-0.165495	0.1672	2.41221	0.414557	0.272386		4.94098e-06	0.000631881	0.272702	0.0184883		-0.269745	0.265155	2.4085	0.415196	0.276305		1.14177e-05	0.000608783	0.276609	0.044344
						0.159681	0.256344	2.38324	0.419596	0.254646		1.25078e-05	0.000467762	0.25488	0.063223		-0.165058	0.166743	2.41218	0.414562	0.273018		4.94584e-06	0.000632494	0.273334	0.0184886		-0.270147	0.265612	2.40844	0.415207	0.276913		1.14288e-05	0.000609347	0.277218	0.0443461
						0.160138	0.256445	2.38317	0.419609	0.255113		1.25558e-05	0.000468026	0.255347	0.06343		-0.164621	0.166286	2.41216	0.414567	0.27365		4.95058e-06	0.000633092	0.273967	0.0184888		-0.27055	0.266069	2.40837	0.415218	0.277523		1.16323e-05	0.000609901	0.277828	0.0450947
						0.160595	0.256547	2.3831	0.419621	0.255581		1.25481e-05	0.000468295	0.255816	0.0633545		-0.164183	0.165829	2.41213	0.414572	0.274283		5.17926e-06	0.000633674	0.2746	0.0193251		-0.270954	0.266526	2.4083	0.41523	0.278133		1.19061e-05	0.000610463	0.278438	0.0461137
						0.161052	0.25665	2.38303	0.419634	0.25605		1.22238e-05	0.000468557	0.256284	0.0616824		-0.163743	0.165372	2.4121	0.414577	0.274917		5.18104e-06	0.000633899	0.275234	0.0193249		-0.271359	0.266983	2.40823	0.415242	0.278743		1.2303e-05	0.000611037	0.279049	0.0476061
						0.161508	0.256754	2.38296	0.419646	0.256518		1.22303e-05	0.000468815	0.256753	0.0616813		-0.163304	0.164915	2.41207	0.414582	0.275551		5.18277e-06	0.000634117	0.275868	0.0193246		-0.271765	0.267439	2.40816	0.415254	0.279354		1.23138e-05	0.000611549	0.27966	0.047608
						0.161965	0.256859	2.38289	0.419658	0.256987		1.22368e-05	0.000469077	0.257222	0.0616799		-0.162864	0.164459	2.41204	0.414587	0.276185		5.18444e-06	0.000634329	0.276502	0.0193244		-0.272172	0.267896	2.40809	0.415267	0.279966		1.23244e-05	0.000612051	0.280272	0.0476098
						0.162422	0.256966	2.38282	0.419671	0.257456		1.22434e-05	0.000469342	0.257691	0.0616781		-0.162424	0.164002	2.41201	0.414593	0.276819		5.18607e-06	0.000634535	0.277137	0.0193242		-0.272579	0.268353	2.40802	0.415279	0.280578		1.23347e-05	0.000612544	0.280884	0.0476115
						0.162879	0.257073	2.38275	0.419683	0.257926		1.225e-05	0.000469611	0.25816	0.0616759		-0.161984	0.163545	2.41198	0.414598	0.277454		5.18764e-06	0.000634734	0.277771	0.019324		-0.272987	0.26881	2.40795	0.415291	0.28119		1.23449e-05	0.00061303	0.281497	0.0476132
						0.163336	0.257182	2.38268	0.419695	0.258395		1.22566e-05	0.000469885	0.25863	0.0616734		-0.161543	0.163088	2.41195	0.414603	0.278089		5.18917e-06	0.000634928	0.278406	0.0193238		-0.273396	0.269267	2.40788	0.415304	0.281803		1.2355e-05	0.000613506	0.28211	0.0476147
						0.163793	0.257292	2.38261	0.419707	0.258865		1.22633e-05	0.000470162	0.2591	0.0616705		-0.161102	0.162631	2.41192	0.414608	0.278724		5.26145e-06	0.000635116	0.279041	0.0195871		-0.273805	0.269724	2.40781	0.415316	0.282417		1.23648e-05	0.000613975	0.282724	0.0476163
						0.164249	0.257403	2.38254	0.41972	0.259335		1.23473e-05	0.000470443	0.25957	0.0620559		-0.160661	0.162175	2.41189	0.414613	0.279359		5.41115e-06	0.0006354	0.279676	0.0201354		-0.274215	0.27018	2.40773	0.415328	0.283031		1.23745e-05	0.000614436	0.283338	0.0476177
						0.164706	0.257516	2.38247	0.419732	0.259806		1.26728e-05	0.000470729	0.260041	0.0636535		-0.160219	0.161718	2.41185	0.414619	0.279994		5.41533e-06	0.000635887	0.280312	0.0201356		-0.274626	0.270637	2.40766	0.415341	0.283645		1.2384e-05	0.000614889	0.283953	0.0476191
						0.165163	0.257629	2.3824	0.419745	0.260276		1.26804e-05	0.000471019	0.260512	0.0636524		-0.159777	0.161261	2.41182	0.414624	0.28063		5.41941e-06	0.000636362	0.280948	0.0201357		-0.275038	0.271094	2.40759	0.415353	0.28426		1.25771e-05	0.000615335	0.284568	0.0483267
						0.16562	0.257744	2.38233	0.419757	0.260747		1.231e-05	0.000471312	0.260983	0.0617544		-0.159334	0.160804	2.41179	0.41463	0.281266		5.61928e-06	0.000636828	0.281585	0.0208631		-0.27545	0.271551	2.40752	0.415366	0.284875		1.28352e-05	0.000615789	0.285183	0.0492822
						0.166077	0.25786	2.38226	0.41977	0.261219		1.19979e-05	0.000471599	0.261454	0.0601521		-0.15889	0.160347	2.41176	0.414635	0.281903		5.62048e-06	0.000636968	0.282222	0.0208629		-0.275863	0.272008	2.40744	0.415378	0.285491		1.2845e-05	0.000616256	0.285799	0.0492822
						0.166534	0.257977	2.38219	0.419782	0.26169		1.2005e-05	0.000471879	0.261926	0.0601521		-0.158446	0.15989	2.41173	0.414641	0.28254		5.62165e-06	0.000637104	0.282859	0.0208628		-0.276277	0.272465	2.40737	0.415391	0.286108		1.31354e-05	0.000616715	0.286416	0.0503593
						0.16699	0.258095	2.38212	0.419794	0.262162		1.20122e-05	0.000472163	0.262398	0.0601517		-0.158002	0.159434	2.41169	0.414646	0.283177		5.62278e-06	0.000637236	0.283496	0.0208627		-0.276691	0.272921	2.40729	0.415404	0.286724		1.32402e-05	0.000617129	0.287033	0.050727
						0.167447	0.258215	2.38205	0.419806	0.262634		1.20193e-05	0.000472451	0.262871	0.0601511		-0.157558	0.158977	2.41166	0.414652	0.283815		5.62389e-06	0.000637365	0.284133	0.0208626		-0.277106	0.273378	2.40722	0.415418	0.287341		1.3249e-05	0.000617525	0.28765	0.0507281
						0.167904	0.258335	2.38199	0.419818	0.263107		1.20266e-05	0.000472743	0.263343	0.0601501		-0.157113	0.15852	2.41163	0.414658	0.284452		5.62497e-06	0.000637491	0.284771	0.0208624		-0.277521	0.273835	2.40714	0.415431	0.287959		1.32577e-05	0.000617914	0.288268	0.0507292
						0.168361	0.258457	2.38192	0.41983	0.26358		1.22014e-05	0.000473038	0.263816	0.0609863		-0.156669	0.158063	2.41159	0.414663	0.285089		5.62601e-06	0.000637613	0.285408	0.0208623		-0.277938	0.274292	2.40706	0.415444	0.288577		1.32661e-05	0.000618297	0.288886	0.0507302
						0.168818	0.258579	2.38185	0.419842	0.264053		1.24133e-05	0.000473338	0.264289	0.0620061		-0.156224	0.157606	2.41156	0.414669	0.285727		5.62704e-06	0.000637732	0.286046	0.0208622		-0.278354	0.274749	2.40699	0.415457	0.289195		1.32745e-05	0.000618675	0.289504	0.0507312
						0.169275	0.258703	2.38178	0.419854	0.264526		1.24214e-05	0.000473642	0.264763	0.0620066		-0.155779	0.157149	2.41153	0.414675	0.286365		5.82028e-06	0.000637849	0.286684	0.0215747		-0.278771	0.275206	2.40691	0.415471	0.289814		1.32827e-05	0.000619046	0.290123	0.0507321
						0.169731	0.258828	2.38171	0.419867	0.265		1.24295e-05	0.00047395	0.265237	0.0620068		-0.155334	0.156693	2.4115	0.41468	0.287003		5.82401e-06	0.000638251	0.287322	0.021575		-0.279189	0.275662	2.40683	0.415484	0.290433		1.32908e-05	0.000619412	0.290743	0.050733
						0.170188	0.258955	2.38164	0.419879	0.265473		1.24376e-05	0.000474263	0.265711	0.0620066		-0.154888	0.156236	2.41146	0.414686	0.287641		5.82764e-06	0.000638647	0.28796	0.021575		-0.279607	0.276119	2.40675	0.415497	0.291052		1.34726e-05	0.000619772	0.291362	0.0513973
						0.170645	0.259082	2.38157	0.419892	0.265948		1.20818e-05	0.000474579	0.266185	0.0601923		-0.154442	0.155779	2.41143	0.414692	0.288279		5.99909e-06	0.000639035	0.288599	0.0221963		-0.280026	0.276576	2.40668	0.415511	0.291672		1.3716e-05	0.000620141	0.291982	0.0522945
						0.171102	0.259211	2.3815	0.419904	0.266422		1.1782e-05	0.000474886	0.26666	0.0586608		-0.153995	0.155322	2.41139	0.414698	0.288918		5.9999e-06	0.000639123	0.289238	0.0221962		-0.280446	0.277033	2.4066	0.415525	0.292292		1.37244e-05	0.000620522	0.292602	0.0522944
						0.171559	0.25934	2.38143	0.419915	0.266897		1.17896e-05	0.000475186	0.267135	0.0586618		-0.153548	0.154865	2.41136	0.414704	0.289558		6.00069e-06	0.000639209	0.289877	0.0221961		-0.280866	0.27749	2.40652	0.415538	0.292913		1.37327e-05	0.000620897	0.293223	0.0522943
						0.172016	0.259471	2.38136	0.419927	0.267372		1.17973e-05	0.00047549	0.26761	0.0586625		-0.153101	0.154408	2.41132	0.41471	0.290197		6.00146e-06	0.000639293	0.290516	0.0221961		-0.281286	0.277947	2.40644	0.415552	0.293534		1.39976e-05	0.000621265	0.293844	0.0532717
						0.172472	0.259603	2.3813	0.419939	0.267848		1.21022e-05	0.000475798	0.268086	0.0601398		-0.152654	0.153952	2.41129	0.414716	0.290836		6.00221e-06	0.000639376	0.291156	0.022196		-0.281707	0.278403	2.40636	0.415566	0.294155		1.41088e-05	0.000621596	0.294466	0.0536663
						0.172929	0.259736	2.38123	0.419951	0.268324		1.2161e-05	0.00047611	0.268562	0.0603921		-0.152206	0.153495	2.41125	0.414722	0.291475		6.00295e-06	0.000639456	0.291795	0.0221959		-0.282129	0.27886	2.40628	0.41558	0.294776		1.41161e-05	0.000621909	0.295087	0.053667
						0.173386	0.25987	2.38116	0.419963	0.2688		1.21694e-05	0.000476425	0.269038	0.0603941		-0.151759	0.153038	2.41122	0.414728	0.292115		6.00367e-06	0.000639534	0.292435	0.0221959		-0.282551	0.279317	2.40619	0.415594	0.295398		1.41233e-05	0.000622218	0.295709	0.0536677
						0.173843	0.260005	2.38109	0.419975	0.269276		1.21779e-05	0.000476745	0.269515	0.0603957		-0.151311	0.152581	2.41118	0.414734	0.292754		6.00437e-06	0.000639611	0.293074	0.0221958		-0.282973	0.279774	2.40611	0.415608	0.296021		1.41304e-05	0.000622523	0.296332	0.0536683
						0.1743	0.260142	2.38102	0.419988	0.269753		1.21865e-05	0.000477069	0.269992	0.060397		-0.150864	0.152124	2.41115	0.41474	0.293394		6.13018e-06	0.000639686	0.293714	0.0226582		-0.283396	0.280231	2.40603	0.415622	0.296643		1.41374e-05	0.000622823	0.296954	0.0536689
						0.174757	0.260279	2.38095	0.42	0.27023		1.2195e-05	0.000477397	0.270469	0.060398		-0.150416	0.151667	2.41111	0.414746	0.294034		6.17356e-06	0.000639964	0.294354	0.0228086		-0.283819	0.280688	2.40595	0.415637	0.297266		1.41442e-05	0.00062312	0.297577	0.0536694
						0.175213	0.260418	2.38088	0.420012	0.270707		1.22037e-05	0.000477729	0.270946	0.0603988		-0.149968	0.151211	2.41108	0.414752	0.294674		6.17684e-06	0.000640303	0.294994	0.0228087		-0.284243	0.281144	2.40587	0.415651	0.297889		1.43139e-05	0.000623412	0.298201	0.0542878
						0.17567	0.260558	2.38082	0.420024	0.271185		1.18624e-05	0.000478065	0.271424	0.0586686		-0.149519	0.150754	2.41104	0.414759	0.295314		6.3204e-06	0.000640637	0.295634	0.0233266		-0.284667	0.281601	2.40578	0.415665	0.298512		1.45413e-05	0.000623713	0.298824	0.0551234
						0.176127	0.260699	2.38075	0.420036	0.271663		1.17038e-05	0.000478391	0.271902	0.0578444		-0.14907	0.150297	2.411	0.414765	0.295955		6.32095e-06	0.000640694	0.296275	0.0233266		-0.285092	0.282058	2.4057	0.41568	0.299136		1.45485e-05	0.000624027	0.299448	0.0551233
						0.176584	0.260841	2.38068	0.420048	0.272142		1.19069e-05	0.000478708	0.272381	0.0588096		-0.148621	0.14984	2.41097	0.414771	0.296595		6.32148e-06	0.000640749	0.296916	0.0233265		-0.285517	0.282515	2.40561	0.415694	0.29976		1.45557e-05	0.000624335	0.300072	0.0551231
						0.177041	0.260984	2.38061	0.42006	0.27262		1.19156e-05	0.000479029	0.27286	0.0588131		-0.148171	0.149383	2.41093	0.414778	0.297236		6.322e-06	0.000640802	0.297557	0.0233265		-0.285943	0.282972	2.40553	0.415709	0.300385		1.45627e-05	0.000624638	0.300697	0.0551229
						0.177497	0.261128	2.38055	0.420072	0.273099		1.19243e-05	0.000479354	0.273339	0.0588162		-0.147722	0.148926	2.41089	0.414784	0.297877		6.32251e-06	0.000640855	0.298197	0.0233265		-0.286369	0.283429	2.40545	0.415723	0.301009		1.4859e-05	0.000624936	0.301322	0.0562177
						0.177954	0.261273	2.38048	0.420084	0.273579		1.18177e-05	0.000479683	0.273819	0.0582502		-0.147273	0.14847	2.41086	0.41479	0.298518		6.32301e-06	0.000640907	0.298838	0.0233264		-0.286795	0.283885	2.40536	0.415738	0.301634		1.49159e-05	0.000625195	0.301947	0.0564098
						0.178411	0.261419	2.38041	0.420095	0.274058		1.17909e-05	0.000480014	0.274298	0.0580782		-0.146823	0.148013	2.41082	0.414796	0.299159		6.3235e-06	0.000640957	0.299479	0.0233264		-0.287222	0.284342	2.40527	0.415753	0.302259		1.4922e-05	0.000625445	0.302572	0.0564102
						0.178868	0.261567	2.38035	0.420107	0.274538		1.17986e-05	0.00048035	0.274779	0.0580756		-0.146373	0.147556	2.41078	0.414803	0.2998		6.32397e-06	0.000641007	0.30012	0.0233263		-0.287649	0.284799	2.40519	0.415768	0.302885		1.4928e-05	0.000625692	0.303198	0.0564106
						0.179325	0.261715	2.38028	0.420119	0.275019		1.18064e-05	0.000480689	0.275259	0.0580728		-0.145924	0.147099	2.41075	0.414809	0.300441		6.40327e-06	0.000641055	0.300761	0.023617		-0.288077	0.285256	2.4051	0.415783	0.30351		1.49339e-05	0.000625935	0.303823	0.0564109
						0.179782	0.261865	2.38021	0.420131	0.275499		1.18378e-05	0.000481033	0.27574	0.0581856		-0.145474	0.146642	2.41071	0.414816	0.301082		6.46564e-06	0.000641247	0.301402	0.02384		-0.288505	0.285713	2.40502	0.415798	0.304136		1.49397e-05	0.000626176	0.304449	0.0564113
						0.180238	0.262015	2.38014	0.420143	0.27598		1.21583e-05	0.000481381	0.276221	0.0597177		-0.145024	0.146185	2.41067	0.414822	0.301723		6.46866e-06	0.000641545	0.302044	0.02384		-0.288933	0.28617	2.40493	0.415813	0.304763		1.50965e-05	0.000626414	0.305076	0.0569815
						0.180695	0.262167	2.38008	0.420155	0.276462		1.18163e-05	0.000481733	0.276703	0.0579955		-0.144574	0.145729	2.41063	0.414828	0.302364		6.585e-06	0.000641841	0.302685	0.0242576		-0.289361	0.286626	2.40484	0.415828	0.305389		1.53067e-05	0.000626661	0.305702	0.0577521
						0.181152	0.26232	2.38001	0.420167	0.276944		1.15282e-05	0.000482073	0.277185	0.0565418		-0.144123	0.145272	2.4106	0.414835	0.303006		6.58536e-06	0.000641876	0.303327	0.0242576		-0.28979	0.287083	2.40475	0.415843	0.306016		1.5313e-05	0.000626921	0.306329	0.0577519
						0.181609	0.262474	2.37994	0.420178	0.277426		1.15361e-05	0.000482403	0.277667	0.0565417		-0.143672	0.144815	2.41056	0.414842	0.303648		6.58571e-06	0.000641911	0.303969	0.0242576		-0.29022	0.28754	2.40466	0.415858	0.306643		1.53192e-05	0.000627177	0.306956	0.0577517
						0.182066	0.262629	2.37988	0.42019	0.277908		1.1544e-05	0.000482738	0.278149	0.0565413		-0.143221	0.144358	2.41052	0.414848	0.30429		6.58606e-06	0.000641945	0.304611	0.0242575		-0.290649	0.287997	2.40458	0.415874	0.30727		1.53253e-05	0.000627428	0.307583	0.0577515
						0.182523	0.262785	2.37981	0.420201	0.278391		1.1552e-05	0.000483076	0.278632	0.0565408		-0.14277	0.143901	2.41048	0.414855	0.304932		6.5864e-06	0.000641979	0.305253	0.0242575		-0.29108	0.288454	2.40449	0.415889	0.307897		1.53699e-05	0.000627675	0.308211	0.0578969
						0.182979	0.262942	2.37975	0.420213	0.278874		1.156e-05	0.000483418	0.279116	0.0565399		-0.142319	0.143444	2.41044	0.414861	0.305574		6.58673e-06	0.000642012	0.305895	0.0242575		-0.29151	0.28891	2.4044	0.415904	0.308525		1.56533e-05	0.000627913	0.308839	0.058942
						0.183436	0.2631	2.37968	0.420224	0.279357		1.15681e-05	0.000483764	0.279599	0.0565389		-0.141868	0.142988	2.41041	0.414868	0.306216		6.58706e-06	0.000642044	0.306537	0.0242575		-0.291941	0.289367	2.40431	0.41592	0.309153		1.56584e-05	0.000628116	0.309467	0.0589423
						0.183893	0.263259	2.37962	0.420236	0.279841		1.18439e-05	0.000484114	0.280083	0.0578452		-0.141417	0.142531	2.41037	0.414875	0.306858		6.58738e-06	0.000642076	0.307179	0.0242575		-0.292372	0.289824	2.40422	0.415936	0.309781		1.56634e-05	0.000628316	0.310095	0.0589425
						0.18435	0.263419	2.37955	0.420248	0.280325		1.18947e-05	0.000484469	0.280567	0.0580508		-0.140965	0.142074	2.41033	0.414881	0.3075		6.63509e-06	0.000642107	0.307821	0.024432		-0.292803	0.290281	2.40413	0.415951	0.310409		1.56684e-05	0.000628514	0.310723	0.0589427
						0.184807	0.263581	2.37948	0.42026	0.28081		1.19035e-05	0.000484828	0.281052	0.0580505		-0.140514	0.141617	2.41029	0.414888	0.308142		6.70205e-06	0.000642238	0.308463	0.0246735		-0.293235	0.290738	2.40404	0.415967	0.311038		1.56734e-05	0.00062871	0.311352	0.0589429
						0.185264	0.263743	2.37941	0.420272	0.281294		1.19123e-05	0.000485191	0.281537	0.05805		-0.140063	0.14116	2.41025	0.414894	0.308785		6.70485e-06	0.000642506	0.309106	0.0246735		-0.293667	0.291195	2.40395	0.415983	0.311666		1.58165e-05	0.000628904	0.311981	0.0594627
						0.18572	0.263907	2.37935	0.420283	0.28178		1.15862e-05	0.000485559	0.282022	0.0564182		-0.139611	0.140704	2.41021	0.414901	0.309427		6.79479e-06	0.000642772	0.309748	0.0249941		-0.294099	0.291651	2.40385	0.415999	0.312295		1.60086e-05	0.000629108	0.31261	0.0601655
						0.186177	0.264071	2.37928	0.420295	0.282265		1.13116e-05	0.000485913	0.282508	0.0550411		-0.139159	0.140247	2.41017	0.414908	0.31007		6.79502e-06	0.000642794	0.310391	0.0249941		-0.294532	0.292108	2.40376	0.416015	0.312924		1.60141e-05	0.000629325	0.313239	0.0601652
						0.186634	0.264237	2.37922	0.420306	0.282751		1.13198e-05	0.000486255	0.282994	0.055042		-0.138707	0.13979	2.41013	0.414915	0.310713		6.79525e-06	0.000642816	0.311034	0.0249941		-0.294964	0.292565	2.40367	0.416031	0.313554		1.60194e-05	0.000629538	0.313868	0.060165
						0.187091	0.264403	2.37915	0.420318	0.283237		1.1328e-05	0.000486602	0.283481	0.0550427		-0.138254	0.139333	2.41009	0.414922	0.311355		6.79547e-06	0.000642837	0.311677	0.0249941		-0.295398	0.293022	2.40358	0.416047	0.314183		1.60247e-05	0.000629748	0.314498	0.0601648
						0.187548	0.264571	2.37909	0.420329	0.283724		1.15557e-05	0.000486952	0.283967	0.0561084		-0.137802	0.138876	2.41005	0.414928	0.311998		6.79569e-06	0.000642858	0.31232	0.0249941		-0.295831	0.293479	2.40348	0.416063	0.314813		1.60299e-05	0.000629955	0.315128	0.0601645
						0.188005	0.26474	2.37902	0.420341	0.284211		1.16293e-05	0.000487307	0.284455	0.0564247		-0.13735	0.138419	2.41001	0.414935	0.312641		6.79591e-06	0.000642879	0.312963	0.0249941		-0.296265	0.293936	2.40339	0.416079	0.315443		1.61793e-05	0.000630158	0.315758	0.0607058
						0.188461	0.264909	2.37896	0.420352	0.284698		1.16381e-05	0.000487665	0.284942	0.056426		-0.136898	0.137963	2.40998	0.414942	0.313284		6.79612e-06	0.000642899	0.313605	0.0249941		-0.296699	0.294392	2.4033	0.416095	0.316073		1.63291e-05	0.00063034	0.316388	0.0612502
						0.188918	0.26508	2.37889	0.420364	0.285186		1.1647e-05	0.000488028	0.28543	0.0564272		-0.136445	0.137506	2.40994	0.414949	0.313927		6.79633e-06	0.000642919	0.314248	0.0249941		-0.297133	0.294849	2.4032	0.416111	0.316703		1.63334e-05	0.000630502	0.317019	0.0612503
						0.189375	0.265251	2.37883	0.420375	0.285674		1.16559e-05	0.000488395	0.285918	0.056428		-0.135993	0.137049	2.4099	0.414956	0.31457		6.82315e-06	0.000642939	0.314891	0.025092		-0.297568	0.295306	2.40311	0.416128	0.317334		1.63376e-05	0.000630663	0.317649	0.0612504
						0.189832	0.265424	2.37876	0.420387	0.286162		1.16649e-05	0.000488767	0.286407	0.0564287		-0.13554	0.136592	2.40986	0.414962	0.315213		6.88475e-06	0.000643027	0.315534	0.025315		-0.298003	0.295763	2.40301	0.416144	0.317965		1.63417e-05	0.000630823	0.31828	0.0612505
						0.190289	0.265598	2.37869	0.420399	0.286651		1.1674e-05	0.000489142	0.286896	0.0564292		-0.135088	0.136135	2.40982	0.414969	0.315856		6.88736e-06	0.000643271	0.316177	0.025315		-0.298438	0.29622	2.40292	0.41616	0.318595		1.64706e-05	0.000630981	0.318911	0.0617181
						0.190746	0.265773	2.37863	0.42041	0.28714		1.13636e-05	0.000489523	0.287385	0.0548861		-0.134635	0.135678	2.40978	0.414976	0.316499		6.95182e-06	0.000643514	0.316821	0.0255423		-0.298873	0.296677	2.40283	0.416177	0.319226		1.66437e-05	0.00063115	0.319542	0.0623502
						0.191202	0.265949	2.37856	0.420422	0.28763		1.13063e-05	0.000489888	0.287875	0.0545686		-0.134182	0.135222	2.40974	0.414983	0.317143		6.95197e-06	0.000643527	0.317464	0.0255423		-0.299308	0.297133	2.40273	0.416193	0.319858		1.66485e-05	0.000631332	0.320173	0.06235
						0.191659	0.266126	2.3785	0.420433	0.28812		1.13704e-05	0.00049024	0.288365	0.0548389		-0.133728	0.134765	2.4097	0.41499	0.317786		6.95211e-06	0.00064354	0.318108	0.0255423		-0.299744	0.29759	2.40263	0.41621	0.320489		1.66532e-05	0.000631511	0.320805	0.0623498
						0.192116	0.266304	2.37844	0.420444	0.28861		1.12488e-05	0.000490596	0.288855	0.0542126		-0.133275	0.134308	2.40966	0.414997	0.31843		6.95225e-06	0.000643553	0.318751	0.0255423		-0.30018	0.298047	2.40254	0.416227	0.32112		1.66578e-05	0.000631688	0.321436	0.0623496
						0.192573	0.266482	2.37837	0.420456	0.289101		1.12324e-05	0.000490955	0.289346	0.0540941		-0.132822	0.133851	2.40962	0.415004	0.319073		6.95238e-06	0.000643566	0.319395	0.0255423		-0.300616	0.298504	2.40244	0.416243	0.321752		1.66623e-05	0.000631862	0.322068	0.0623494
						0.19303	0.266662	2.37831	0.420467	0.289591		1.12405e-05	0.000491319	0.289837	0.0540929		-0.132369	0.133394	2.40958	0.415011	0.319717		6.95251e-06	0.000643578	0.320039	0.0255423		-0.301053	0.298961	2.40234	0.41626	0.322384		1.66668e-05	0.000632034	0.3227	0.0623491
						0.193487	0.266843	2.37824	0.420478	0.290083		1.12486e-05	0.000491686	0.290329	0.0540915		-0.131915	0.132937	2.40953	0.415018	0.32036		6.95264e-06	0.00064359	0.320682	0.0255423		-0.30149	0.299418	2.40225	0.416277	0.323016		1.69207e-05	0.000632203	0.323332	0.0632823
						0.193943	0.267025	2.37818	0.420489	0.290574		1.12567e-05	0.000492058	0.29082	0.0540898		-0.131462	0.132481	2.40949	0.415025	0.321004		6.95277e-06	0.000643602	0.321326	0.0255423		-0.301927	0.299874	2.40215	0.416294	0.323648		1.69349e-05	0.000632335	0.323964	0.0633221
						0.1944	0.267208	2.37812	0.420501	0.291067		1.1265e-05	0.000492435	0.291313	0.054088		-0.131009	0.132024	2.40945	0.415032	0.321648		6.96637e-06	0.000643614	0.321969	0.0255918		-0.302364	0.300331	2.40205	0.41631	0.324281		1.69384e-05	0.000632464	0.324597	0.0633221
						0.194857	0.267392	2.37805	0.420512	0.291559		1.15135e-05	0.000492816	0.291805	0.0552384		-0.130555	0.131567	2.40941	0.415039	0.322291		7.01584e-06	0.000643672	0.322613	0.0257712		-0.302801	0.300788	2.40196	0.416327	0.324913		1.69419e-05	0.000632593	0.325229	0.0633222
						0.195314	0.267576	2.37799	0.420523	0.292052		1.15484e-05	0.000493201	0.292298	0.0553626		-0.130102	0.13111	2.40937	0.415046	0.322935		7.0183e-06	0.000643897	0.323257	0.0257712		-0.303239	0.301245	2.40186	0.416344	0.325546		1.7056e-05	0.000632722	0.325862	0.063736
						0.195771	0.267762	2.37792	0.420535	0.292545		1.12409e-05	0.000493591	0.292792	0.0538461		-0.129648	0.130653	2.40933	0.415053	0.323579		7.05832e-06	0.000644121	0.323901	0.0259092		-0.303677	0.301702	2.40176	0.416361	0.326178		1.72096e-05	0.000632861	0.326495	0.0642954
						0.196227	0.267949	2.37786	0.420546	0.293039		1.09821e-05	0.000493964	0.293286	0.0525663		-0.129194	0.130196	2.40929	0.41506	0.324223		7.0584e-06	0.000644128	0.324545	0.0259092		-0.304115	0.302159	2.40166	0.416379	0.326811		1.72137e-05	0.000633016	0.327128	0.0642952
						0.196684	0.268137	2.3778	0.420557	0.293533		1.09901e-05	0.000494323	0.29378	0.0525666		-0.12874	0.12974	2.40925	0.415067	0.324867		7.05848e-06	0.000644136	0.325189	0.0259092		-0.304553	0.302615	2.40156	0.416396	0.327444		1.72178e-05	0.000633168	0.327761	0.064295
						0.197141	0.268326	2.37774	0.420568	0.294027		1.09982e-05	0.000494686	0.294274	0.0525668		-0.128286	0.129283	2.40921	0.415074	0.325511		7.05856e-06	0.000644143	0.325833	0.0259092		-0.304991	0.303072	2.40146	0.416413	0.328077		1.72218e-05	0.000633318	0.328394	0.0642948
						0.197598	0.268516	2.37767	0.420579	0.294522		1.10064e-05	0.000495054	0.294769	0.0525669		-0.127832	0.128826	2.40917	0.415081	0.326155		7.05864e-06	0.00064415	0.326477	0.0259092		-0.30543	0.303529	2.40136	0.41643	0.328711		1.72258e-05	0.000633466	0.329027	0.0642946
						0.198055	0.268707	2.37761	0.42059	0.295017		1.10417e-05	0.000495425	0.295264	0.052696		-0.127377	0.128369	2.40913	0.415088	0.326799		7.05872e-06	0.000644157	0.327121	0.0259091		-0.305869	0.303986	2.40126	0.416448	0.329344		1.72297e-05	0.000633612	0.329661	0.0642944
						0.198512	0.268898	2.37755	0.420601	0.295512		1.12633e-05	0.000495801	0.29576	0.0537129		-0.126923	0.127912	2.40909	0.415095	0.327444		7.05879e-06	0.000644164	0.327766	0.0259091		-0.306308	0.304443	2.40116	0.416465	0.329978		1.73453e-05	0.000633756	0.330295	0.064711
						0.198968	0.269091	2.37748	0.420613	0.296008		1.1272e-05	0.000496181	0.296256	0.0537132		-0.126469	0.127455	2.40905	0.415102	0.328088		7.05886e-06	0.000644171	0.32841	0.0259091		-0.306747	0.3049	2.40106	0.416482	0.330612		1.74658e-05	0.000633879	0.330928	0.0651482
						0.199425	0.269285	2.37742	0.420624	0.296504		1.12808e-05	0.000496566	0.296752	0.0537134		-0.126015	0.126999	2.409	0.415109	0.328732		7.06461e-06	0.000644177	0.329054	0.02593		-0.307187	0.305356	2.40096	0.4165	0.331245		1.74687e-05	0.000633983	0.331562	0.0651482
						0.199882	0.269479	2.37736	0.420635	0.297001		1.12896e-05	0.000496955	0.297249	0.0537134		-0.125561	0.126542	2.40896	0.415116	0.329376		7.09761e-06	0.000644214	0.329698	0.0260496		-0.307626	0.305813	2.40086	0.416517	0.331879		1.74715e-05	0.000634086	0.332196	0.0651481
						0.200339	0.269675	2.37729	0.420646	0.297498		1.12985e-05	0.000497348	0.297746	0.0537132		-0.125107	0.126085	2.40892	0.415123	0.33002		7.09991e-06	0.000644423	0.330342	0.0260496		-0.308066	0.30627	2.40076	0.416534	0.332513		1.75706e-05	0.000634188	0.332831	0.065507
						0.200796	0.269871	2.37723	0.420658	0.297995		1.10074e-05	0.000497746	0.298244	0.0522871		-0.124652	0.125628	2.40888	0.415131	0.330665		7.11663e-06	0.000644632	0.330987	0.0261025		-0.308506	0.306727	2.40066	0.416552	0.333148		1.7704e-05	0.000634304	0.333465	0.0659922
						0.201253	0.270069	2.37717	0.420669	0.298493		1.07623e-05	0.000498126	0.298742	0.0510838		-0.124197	0.125171	2.40884	0.415138	0.331309		7.11667e-06	0.000644636	0.331632	0.0261025		-0.308946	0.307184	2.40056	0.41657	0.333782		1.77076e-05	0.000634436	0.334099	0.065992
						0.201709	0.270268	2.37711	0.420679	0.298991		1.08595e-05	0.00049849	0.29924	0.0515077		-0.123742	0.124714	2.4088	0.415145	0.331954		7.11671e-06	0.000644639	0.332276	0.0261025		-0.309386	0.30764	2.40046	0.416587	0.334416		1.77112e-05	0.000634566	0.334734	0.0659918
						0.202166	0.270467	2.37705	0.42069	0.299489		1.09942e-05	0.000498858	0.299739	0.052108		-0.123288	0.124258	2.40876	0.415152	0.332599		7.11675e-06	0.000644643	0.332921	0.0261025		-0.309826	0.308097	2.40035	0.416605	0.335051		1.77147e-05	0.000634695	0.335368	0.0659916
						0.202623	0.270668	2.37698	0.420701	0.299988		1.10027e-05	0.000499231	0.300238	0.0521097		-0.122833	0.123801	2.40872	0.415159	0.333243		7.11679e-06	0.000644646	0.333566	0.0261025		-0.310267	0.308554	2.40025	0.416623	0.335686		1.77182e-05	0.000634822	0.336003	0.0659914
						0.20308	0.270869	2.37692	0.420712	0.300487		1.10114e-05	0.000499607	0.300737	0.0521112		-0.122378	0.123344	2.40867	0.415166	0.333888		7.11683e-06	0.00064465	0.33421	0.0261025		-0.310708	0.309011	2.40015	0.416641	0.33632		1.77217e-05	0.000634947	0.336638	0.0659912
						0.203537	0.271071	2.37686	0.420723	0.300987		1.102e-05	0.000499988	0.301237	0.0521126		-0.121923	0.122887	2.40863	0.415173	0.334533		7.11686e-06	0.000644653	0.334855	0.0261025		-0.311149	0.309468	2.40005	0.416658	0.336955		1.77394e-05	0.000635071	0.337273	0.0660443
						0.203994	0.271274	2.3768	0.420734	0.301487		1.09346e-05	0.000500373	0.301737	0.0516688		-0.121468	0.12243	2.40859	0.41518	0.335177		7.1169e-06	0.000644656	0.3355	0.0261025		-0.31159	0.309925	2.39995	0.416676	0.33759		1.79244e-05	0.00063519	0.337908	0.0667208
						0.20445	0.271479	2.37673	0.420745	0.301987		1.0879e-05	0.000500763	0.302238	0.051366		-0.121013	0.121974	2.40855	0.415187	0.335822		7.11843e-06	0.00064466	0.336144	0.026108		-0.312031	0.310381	2.39984	0.416694	0.338226		1.79267e-05	0.00063527	0.338543	0.0667208
						0.204907	0.271684	2.37667	0.420756	0.302488		1.08872e-05	0.000501158	0.302739	0.0513641		-0.120559	0.121517	2.40851	0.415195	0.336467		7.13244e-06	0.000644682	0.336789	0.0261585		-0.312473	0.310838	2.39974	0.416712	0.338861		1.79289e-05	0.000635349	0.339179	0.0667207
						0.205364	0.27189	2.37661	0.420767	0.302989		1.10709e-05	0.000501558	0.30324	0.0521892		-0.120104	0.12106	2.40847	0.415202	0.337111		7.13461e-06	0.000644878	0.337434	0.0261584		-0.312914	0.311295	2.39964	0.41673	0.339496		1.80126e-05	0.000635429	0.339814	0.0670238
						0.205821	0.272097	2.37655	0.420778	0.303491		1.08287e-05	0.000501963	0.303742	0.0510064		-0.119649	0.120603	2.40843	0.415209	0.337756		7.12922e-06	0.000645074	0.338079	0.0261307		-0.313356	0.311752	2.39953	0.416748	0.340132		1.81255e-05	0.000635524	0.340449	0.0674336
						0.206278	0.272305	2.37649	0.420789	0.303993		1.05878e-05	0.000502347	0.304244	0.0498333		-0.119193	0.120146	2.40839	0.415216	0.338401		7.12924e-06	0.000645076	0.338724	0.0261307		-0.313798	0.312209	2.39943	0.416766	0.340767		1.81287e-05	0.000635639	0.341085	0.0674335
						0.206735	0.272514	2.37643	0.4208	0.304495		1.05955e-05	0.000502715	0.304746	0.0498334		-0.118738	0.119689	2.40834	0.415223	0.339046		7.12925e-06	0.000645077	0.339369	0.0261307		-0.31424	0.312666	2.39932	0.416784	0.341403		1.81319e-05	0.000635751	0.341721	0.0674333
						0.207191	0.272724	2.37637	0.42081	0.304998		1.06034e-05	0.000503087	0.305249	0.0498334		-0.118282	0.119233	2.4083	0.41523	0.339691		7.12927e-06	0.000645079	0.340014	0.0261307		-0.314682	0.313122	2.39922	0.416802	0.342039		1.8135e-05	0.000635863	0.342357	0.0674331
						0.207648	0.272934	2.37631	0.420821	0.305501		1.06113e-05	0.000503463	0.305753	0.0498332		-0.117827	0.118776	2.40826	0.415237	0.340336		7.12928e-06	0.00064508	0.340659	0.0261307		-0.315124	0.313579	2.39911	0.41682	0.342675		1.81381e-05	0.000635973	0.342992	0.0674329
						0.208105	0.273146	2.37625	0.420831	0.306004		1.06192e-05	0.000503843	0.306256	0.0498329		-0.117371	0.118319	2.40822	0.415244	0.340981		7.12929e-06	0.000645081	0.341304	0.0261307		-0.315567	0.314036	2.39901	0.416839	0.34331		1.81411e-05	0.000636081	0.343629	0.0674327
						0.208562	0.273358	2.37619	0.420842	0.306508		1.06789e-05	0.000504228	0.30676	0.0500747		-0.116916	0.117862	2.40818	0.415252	0.341627		7.12931e-06	0.000645082	0.341949	0.0261307		-0.316009	0.314493	2.39891	0.416857	0.343947		1.81441e-05	0.000636188	0.344265	0.0674326
						0.209019	0.273572	2.37613	0.420853	0.307012		1.08294e-05	0.000504618	0.307265	0.0507414		-0.11646	0.117405	2.40814	0.415259	0.342272		7.12932e-06	0.000645083	0.342594	0.0261307		-0.316452	0.31495	2.3988	0.416875	0.344583		1.82612e-05	0.000636294	0.344901	0.0678566
						0.209476	0.273786	2.37607	0.420863	0.307517		1.08379e-05	0.000505012	0.30777	0.0507413		-0.116005	0.116948	2.4081	0.415266	0.342917		7.12892e-06	0.000645084	0.343239	0.0261292		-0.316895	0.315407	2.3987	0.416893	0.345219		1.83112e-05	0.000636366	0.345537	0.0680343
						0.209932	0.274002	2.37601	0.420874	0.308022		1.08464e-05	0.000505411	0.308275	0.050741		-0.115549	0.116492	2.40805	0.415273	0.343562		7.12285e-06	0.000645097	0.343884	0.0261065		-0.317338	0.315863	2.39859	0.416911	0.345855		1.83128e-05	0.000636425	0.346174	0.0680343
						0.210389	0.274218	2.37595	0.420885	0.308527		1.08549e-05	0.000505814	0.30878	0.0507406		-0.115094	0.116035	2.40801	0.41528	0.344207		7.1249e-06	0.000645283	0.34453	0.0261064		-0.317781	0.31632	2.39849	0.41693	0.346492		1.8381e-05	0.000636484	0.34681	0.0682812
						0.210846	0.274435	2.37588	0.420896	0.309033		1.05853e-05	0.000506223	0.309286	0.04944		-0.114638	0.115578	2.40797	0.415287	0.344852		7.09864e-06	0.000645468	0.345175	0.0260028		-0.318224	0.316777	2.39838	0.416948	0.347128		1.84732e-05	0.000636561	0.347447	0.0686152
						0.211303	0.274653	2.37582	0.420907	0.309539		1.03582e-05	0.000506609	0.309793	0.0483426		-0.114182	0.115121	2.40793	0.415294	0.345498		7.09864e-06	0.000645469	0.34582	0.0260028		-0.318668	0.317234	2.39827	0.416967	0.347765		1.8476e-05	0.000636661	0.348083	0.0686151
						0.21176	0.274872	2.37577	0.420917	0.310046		1.03659e-05	0.000506978	0.3103	0.0483436		-0.113726	0.114664	2.40789	0.415301	0.346143		7.09864e-06	0.000645469	0.346466	0.0260028		-0.319111	0.317691	2.39817	0.416985	0.348402		1.84788e-05	0.000636759	0.34872	0.0686149
						0.212217	0.275092	2.37571	0.420927	0.310553		1.05113e-05	0.00050735	0.310807	0.0489856		-0.11327	0.114207	2.40785	0.415309	0.346789		7.09865e-06	0.000645469	0.347111	0.0260028		-0.319555	0.318148	2.39806	0.417004	0.349038		1.84816e-05	0.000636857	0.349357	0.0686147
						0.212673	0.275313	2.37565	0.420938	0.31106		1.05517e-05	0.000507727	0.311314	0.0491373		-0.112814	0.113751	2.40781	0.415316	0.347434		7.09865e-06	0.000645469	0.347757	0.0260028		-0.319998	0.318604	2.39796	0.417022	0.349675		1.84844e-05	0.000636953	0.349994	0.0686146
						0.21313	0.275534	2.37559	0.420948	0.311568		1.05598e-05	0.000508108	0.311822	0.0491384		-0.112358	0.113294	2.40777	0.415323	0.34808		7.09865e-06	0.000645469	0.348402	0.0260028		-0.320442	0.319061	2.39785	0.41704	0.350312		1.84871e-05	0.000637048	0.350631	0.0686144
						0.213587	0.275757	2.37553	0.420959	0.312076		1.05681e-05	0.000508493	0.312331	0.0491394		-0.111902	0.112837	2.40772	0.41533	0.348725		7.09865e-06	0.000645469	0.349048	0.0260028		-0.320886	0.319518	2.39774	0.417059	0.350949		1.84897e-05	0.000637141	0.351268	0.0686142
						0.214044	0.27598	2.37547	0.42097	0.312585		1.05764e-05	0.000508883	0.312839	0.0491402		-0.111446	0.11238	2.40768	0.415337	0.34937		7.09865e-06	0.000645469	0.349693	0.0260028		-0.32133	0.319975	2.39764	0.417077	0.351586		1.854e-05	0.000637234	0.351905	0.0687908
						0.214501	0.276204	2.37541	0.42098	0.313094		1.05522e-05	0.000509278	0.313348	0.04899		-0.11099	0.111923	2.40764	0.415344	0.350016		7.09754e-06	0.000645469	0.350339	0.0259987		-0.321775	0.320432	2.39753	0.417096	0.352224		1.86215e-05	0.000637306	0.352542	0.0690853
						0.214958	0.276429	2.37535	0.420991	0.313603		1.04377e-05	0.000509678	0.313858	0.0484202		-0.110534	0.111466	2.4076	0.415351	0.350661		7.07142e-06	0.000645476	0.350984	0.0259027		-0.322219	0.320889	2.39742	0.417115	0.352861		1.86226e-05	0.000637345	0.35318	0.0690852
						0.215414	0.276655	2.37529	0.421001	0.314113		1.05186e-05	0.000510085	0.314368	0.0487567		-0.110078	0.11101	2.40756	0.415358	0.351307		7.07335e-06	0.000645653	0.35163	0.0259027		-0.322663	0.321345	2.39732	0.417133	0.353498		1.86752e-05	0.000637384	0.353817	0.0692761
						0.215871	0.276882	2.37523	0.421012	0.314623		1.03541e-05	0.000510497	0.314878	0.0479553		-0.109622	0.110553	2.40752	0.415365	0.351953		7.0275e-06	0.00064583	0.352275	0.0257278		-0.323108	0.321802	2.39721	0.417152	0.354136		1.87466e-05	0.000637445	0.354454	0.0695343
						0.216328	0.27711	2.37517	0.421022	0.315133		1.01325e-05	0.000510885	0.315389	0.0468937		-0.109165	0.110096	2.40748	0.415372	0.352598		7.0275e-06	0.00064583	0.352921	0.0257278		-0.323553	0.322259	2.3971	0.417171	0.354773		1.87491e-05	0.000637533	0.355092	0.0695341
						0.216785	0.277339	2.37512	0.421032	0.315644		1.01399e-05	0.000511254	0.3159	0.0468937		-0.108709	0.109639	2.40744	0.415379	0.353244		7.0275e-06	0.00064583	0.353567	0.0257278		-0.323997	0.322716	2.39699	0.417189	0.355411		1.87517e-05	0.00063762	0.355729	0.069534
						0.217242	0.277568	2.37506	0.421042	0.316155		1.01473e-05	0.000511628	0.316411	0.0468937		-0.108252	0.109182	2.4074	0.415386	0.35389		7.0275e-06	0.000645829	0.354213	0.0257278		-0.324442	0.323173	2.39689	0.417208	0.356048		1.87541e-05	0.000637706	0.356367	0.0695338
						0.217698	0.277799	2.375	0.421052	0.316667		1.01547e-05	0.000512006	0.316923	0.0468936		-0.107796	0.108725	2.40736	0.415393	0.354536		7.0275e-06	0.000645829	0.354859	0.0257278		-0.324887	0.32363	2.39678	0.417227	0.356686		1.87566e-05	0.000637791	0.357005	0.0695337
						0.218155	0.27803	2.37494	0.421063	0.317179		1.01623e-05	0.000512388	0.317435	0.0468934		-0.107339	0.108269	2.40732	0.4154	0.355182		7.02749e-06	0.000645829	0.355505	0.0257278		-0.325332	0.324086	2.39667	0.417246	0.357324		1.8759e-05	0.000637875	0.357643	0.0695335
						0.218612	0.278262	2.37489	0.421073	0.317691		1.01862e-05	0.000512775	0.317948	0.0469681		-0.106883	0.107812	2.40728	0.415407	0.355827		7.02749e-06	0.000645829	0.35615	0.0257278		-0.325777	0.324543	2.39656	0.417264	0.357962		1.87614e-05	0.000637958	0.358281	0.0695334
						0.219069	0.278495	2.37483	0.421083	0.318204		1.0325e-05	0.000513167	0.318461	0.0475721		-0.106426	0.107355	2.40723	0.415414	0.356473		7.02749e-06	0.000645829	0.356796	0.0257278		-0.326223	0.325	2.39645	0.417283	0.358599		1.87709e-05	0.00063804	0.358919	0.0695597
						0.219526	0.278728	2.37477	0.421093	0.318717		1.0333e-05	0.000513563	0.318974	0.0475719		-0.10597	0.106898	2.40719	0.415421	0.357119		7.02602e-06	0.000645828	0.357442	0.0257224		-0.326668	0.325457	2.39635	0.417302	0.359238		1.88574e-05	0.000638116	0.359557	0.0698719
						0.219983	0.278963	2.37471	0.421104	0.319231		1.0341e-05	0.000513965	0.319488	0.0475716		-0.105513	0.106441	2.40715	0.415429	0.357765		6.98077e-06	0.000645833	0.358088	0.0255565		-0.327113	0.325914	2.39624	0.417321	0.359876		1.8858e-05	0.000638135	0.360195	0.0698718
						0.220439	0.279199	2.37465	0.421114	0.319745		1.03491e-05	0.000514371	0.320002	0.0475711		-0.105057	0.105984	2.40711	0.415436	0.358411		6.98259e-06	0.000646003	0.358734	0.0255565		-0.327559	0.326371	2.39613	0.41734	0.360514		1.88951e-05	0.000638155	0.360833	0.0700071
						0.220896	0.279435	2.3746	0.421124	0.320259		1.01023e-05	0.000514783	0.320517	0.0463997		-0.1046	0.105528	2.40707	0.415442	0.359057		6.91594e-06	0.000645937	0.35938	0.0253151		-0.328005	0.326827	2.39602	0.417359	0.361152		1.89458e-05	0.0006382	0.361471	0.07019
						0.221353	0.279672	2.37454	0.421134	0.320774		9.89449e-06	0.000515169	0.321032	0.0454112		-0.104143	0.105071	2.40703	0.415449	0.359703		6.91594e-06	0.000645937	0.360026	0.0253151		-0.32845	0.327284	2.39591	0.417378	0.36179		1.89481e-05	0.000638279	0.362109	0.0701898
						0.22181	0.27991	2.37448	0.421144	0.321289		9.90169e-06	0.000515534	0.321547	0.0454121		-0.103686	0.104614	2.40699	0.415456	0.360349		6.91594e-06	0.000645937	0.360672	0.0253151		-0.328896	0.327741	2.3958	0.417396	0.362428		1.89503e-05	0.000638356	0.362748	0.0701897
						0.222267	0.280149	2.37443	0.421154	0.321805		1.00165e-05	0.000515903	0.322063	0.0459057		-0.10323	0.104158	2.40695	0.415463	0.360995		6.91593e-06	0.000645937	0.361318	0.0253151		-0.329342	0.328198	2.39569	0.417415	0.363067		1.89526e-05	0.000638433	0.363386	0.0701895
						0.222724	0.280389	2.37437	0.421164	0.322321		1.00412e-05	0.000516277	0.322579	0.0459858		-0.102773	0.103701	2.40691	0.41547	0.361641		6.91593e-06	0.000645937	0.361964	0.0253151		-0.329788	0.328655	2.39559	0.417434	0.363705		1.89548e-05	0.000638509	0.364024	0.0701894
						0.22318	0.28063	2.37431	0.421174	0.322837		1.00488e-05	0.000516655	0.323095	0.0459867		-0.102316	0.103244	2.40687	0.415477	0.362286		6.91593e-06	0.000645936	0.362609	0.0253151		-0.330234	0.329111	2.39548	0.417453	0.364344		1.8957e-05	0.000638584	0.364663	0.0701893
						0.223637	0.280871	2.37426	0.421184	0.323354		1.00564e-05	0.000517038	0.323612	0.0459874		-0.101859	0.102788	2.40683	0.415484	0.362932		6.91593e-06	0.000645936	0.363255	0.0253151		-0.33068	0.329568	2.39537	0.417472	0.364982		1.89592e-05	0.000638658	0.365302	0.0701891
						0.224094	0.281113	2.3742	0.421194	0.323871		1.00641e-05	0.000517425	0.324129	0.0459881		-0.101402	0.102331	2.40679	0.415491	0.363578		6.91592e-06	0.000645936	0.363901	0.0253151		-0.331127	0.330025	2.39526	0.417491	0.365621		1.89613e-05	0.000638732	0.36594	0.070189
						0.224551	0.281356	2.37414	0.421204	0.324388		9.95407e-06	0.000517817	0.324647	0.045451		-0.100945	0.101874	2.40675	0.415498	0.364224		6.91395e-06	0.000645936	0.364547	0.0253079		-0.331573	0.330482	2.39515	0.41751	0.36626		1.90083e-05	0.000638805	0.366579	0.0703548
						0.225008	0.2816	2.37409	0.421214	0.324906		9.93034e-06	0.000518218	0.325165	0.0453076		-0.100489	0.101418	2.40671	0.415505	0.36487		6.8509e-06	0.00064593	0.365193	0.0250773		-0.332019	0.330939	2.39504	0.417529	0.366898		1.90192e-05	0.000638817	0.367218	0.070394
						0.225465	0.281845	2.37403	0.421224	0.325424		1.00219e-05	0.000518626	0.325683	0.0456896		-0.100032	0.100961	2.40667	0.415512	0.365516		6.84917e-06	0.000645768	0.365839	0.0250773		-0.332466	0.331396	2.39493	0.417548	0.367537		1.90409e-05	0.000638816	0.367857	0.0704744
						0.225921	0.28209	2.37398	0.421234	0.325943		9.82359e-06	0.000519039	0.326202	0.0447497		-0.099575	0.100505	2.40663	0.415518	0.366162		6.76507e-06	0.000645605	0.366485	0.0247756		-0.332913	0.331852	2.39482	0.417567	0.368176		1.90712e-05	0.000638847	0.368496	0.0705831
						0.226378	0.282336	2.37392	0.421244	0.326462		9.62235e-06	0.000519425	0.326721	0.0438004		-0.0991181	0.100048	2.40659	0.415525	0.366808		6.76467e-06	0.000645603	0.36713	0.0247742		-0.333359	0.332309	2.39471	0.417586	0.368815		1.90733e-05	0.000638918	0.369134	0.0705829
						0.226835	0.282584	2.37387	0.421254	0.326981		9.62912e-06	0.000519788	0.327241	0.0438005		-0.0986613	0.0995922	2.40655	0.415532	0.367453		6.76466e-06	0.000645602	0.367776	0.0247742		-0.333806	0.332766	2.3946	0.417605	0.369454		1.90753e-05	0.000638988	0.369773	0.0705828
						0.227292	0.282832	2.37381	0.421263	0.327501		9.63596e-06	0.000520157	0.327761	0.0438006		-0.0982045	0.099136	2.40651	0.415539	0.368099		6.76464e-06	0.000645601	0.368422	0.0247742		-0.334253	0.333223	2.3945	0.417624	0.370093		1.90774e-05	0.000639057	0.370412	0.0705827
						0.227749	0.28308	2.37376	0.421273	0.328021		9.64287e-06	0.000520529	0.328281	0.0438006		-0.0977477	0.0986798	2.40648	0.415545	0.368744		6.76463e-06	0.0006456	0.369067	0.0247742		-0.334699	0.33368	2.39439	0.417644	0.370732		1.90794e-05	0.000639126	0.371051	0.0705825
						0.228206	0.28333	2.3737	0.421283	0.328542		9.64985e-06	0.000520907	0.328802	0.0438006		-0.0972908	0.0982236	2.40644	0.415552	0.36939		6.76462e-06	0.000645598	0.369713	0.0247742		-0.335146	0.334137	2.39428	0.417663	0.371371		1.90814e-05	0.000639194	0.371691	0.0705824
						0.228662	0.28358	2.37365	0.421292	0.329062		9.71298e-06	0.000521289	0.329323	0.0440548		-0.096834	0.0977675	2.4064	0.415559	0.370036		6.7646e-06	0.000645597	0.370358	0.0247742		-0.335593	0.334593	2.39417	0.417682	0.37201		1.90834e-05	0.000639262	0.37233	0.0705823
						0.229119	0.283831	2.37359	0.421302	0.329584		9.76654e-06	0.000521676	0.329845	0.0442648		-0.0963772	0.0973113	2.40636	0.415566	0.370681		6.76459e-06	0.000645596	0.371004	0.0247742		-0.336041	0.33505	2.39406	0.417701	0.37265		1.90853e-05	0.000639328	0.372969	0.0705822
						0.229576	0.284083	2.37354	0.421312	0.330105		9.77385e-06	0.000522068	0.330366	0.0442647		-0.0959203	0.0968551	2.40632	0.415573	0.371327		6.76209e-06	0.000645594	0.37165	0.0247651		-0.336488	0.335507	2.39395	0.41772	0.373289		1.90981e-05	0.000639394	0.373609	0.0706221
						0.230033	0.284336	2.37348	0.421322	0.330628		9.78124e-06	0.000522465	0.330889	0.0442645		-0.0954635	0.0963989	2.40628	0.415579	0.371972		6.68268e-06	0.000645588	0.372295	0.0244745		-0.336935	0.335964	2.39384	0.417739	0.373928		1.91069e-05	0.000639409	0.374248	0.0706531
						0.23049	0.284589	2.37343	0.421331	0.33115		9.7887e-06	0.000522867	0.331411	0.0442642		-0.0950067	0.0959428	2.40624	0.415586	0.372618		6.68104e-06	0.000645431	0.372941	0.0244745		-0.337383	0.336421	2.39373	0.417758	0.374568		1.91134e-05	0.000639386	0.374887	0.0706797
						0.230947	0.284844	2.37337	0.421341	0.331673		9.56553e-06	0.000523275	0.331934	0.0432214		-0.0945498	0.0954868	2.4062	0.415593	0.373263		6.58318e-06	0.000645274	0.373586	0.0241219		-0.33783	0.336878	2.39362	0.417777	0.375207		1.91236e-05	0.000639401	0.375527	0.0707157
						0.231403	0.285099	2.37332	0.421351	0.332196		9.37756e-06	0.000523653	0.332458	0.0423414		-0.094093	0.0950311	2.40616	0.415599	0.373909		6.58109e-06	0.000645268	0.374231	0.0241144		-0.338277	0.337334	2.39351	0.417796	0.375846		1.91255e-05	0.000639466	0.376166	0.0707156
						0.23186	0.285355	2.37327	0.42136	0.33272		9.42315e-06	0.000524008	0.332982	0.0425185		-0.0936362	0.0945754	2.40613	0.415606	0.374554		6.58106e-06	0.000645265	0.374877	0.0241144		-0.338725	0.337791	2.3934	0.417815	0.376486		1.91274e-05	0.00063953	0.376806	0.0707154
						0.232317	0.285612	2.37321	0.421369	0.333244		9.47259e-06	0.000524367	0.333506	0.0427122		-0.0931794	0.0941197	2.40609	0.415612	0.375199		6.58103e-06	0.000645262	0.375522	0.0241144		-0.339172	0.338248	2.39329	0.417835	0.377125		1.91293e-05	0.000639594	0.377445	0.0707153
						0.232774	0.285869	2.37316	0.421379	0.333768		9.47934e-06	0.000524731	0.334031	0.0427131		-0.0927225	0.0936639	2.40605	0.415619	0.375844		6.581e-06	0.000645259	0.376167	0.0241144		-0.33962	0.338705	2.39318	0.417854	0.377765		1.91311e-05	0.000639657	0.378085	0.0707152
						0.233231	0.286127	2.37311	0.421388	0.334293		9.48616e-06	0.000525099	0.334555	0.0427139		-0.0922657	0.0932082	2.40601	0.415626	0.37649		6.58097e-06	0.000645256	0.376812	0.0241144		-0.340068	0.339162	2.39307	0.417873	0.378405		1.9133e-05	0.00063972	0.378725	0.0707151
						0.233688	0.286386	2.37305	0.421398	0.334818		9.3774e-06	0.000525471	0.335081	0.0421942		-0.0918089	0.0927525	2.40597	0.415632	0.377135		6.58094e-06	0.000645253	0.377458	0.0241144		-0.340516	0.339619	2.39296	0.417892	0.379044		1.91348e-05	0.000639782	0.379364	0.0707149
						0.234144	0.286646	2.373	0.421407	0.335343		9.35913e-06	0.000525856	0.335606	0.0420812		-0.091352	0.0922968	2.40594	0.415639	0.37778		6.5809e-06	0.00064525	0.378103	0.0241144		-0.340964	0.340075	2.39285	0.417911	0.379684		1.91366e-05	0.000639843	0.380004	0.0707148
						0.234601	0.286906	2.37295	0.421417	0.335869		9.3659e-06	0.000526247	0.336132	0.0420804		-0.0908952	0.0918412	2.4059	0.415645	0.378425		6.57791e-06	0.000645246	0.378748	0.0241036		-0.341412	0.340532	2.39274	0.41793	0.380324		1.91326e-05	0.000639904	0.380644	0.0706933
						0.235058	0.287167	2.3729	0.421426	0.336396		9.40981e-06	0.000526643	0.336659	0.0422458		-0.0904384	0.0913855	2.40586	0.415652	0.379071		6.48336e-06	0.000645238	0.379393	0.0237574		-0.34186	0.340989	2.39263	0.417949	0.380964		1.91219e-05	0.000639927	0.381284	0.0706513
						0.235515	0.287429	2.37284	0.421435	0.336922		9.46019e-06	0.000527045	0.337186	0.0424396		-0.0899816	0.0909298	2.40582	0.415658	0.379716		6.48181e-06	0.000645086	0.380038	0.0237574		-0.342308	0.341446	2.39252	0.417969	0.381604		1.91135e-05	0.000639877	0.381924	0.0706256
						0.235972	0.287692	2.37279	0.421445	0.337449		9.24566e-06	0.000527452	0.337713	0.0414452		-0.0895247	0.0904743	2.40578	0.415665	0.380361		6.37324e-06	0.000644933	0.380683	0.0233649		-0.342756	0.341903	2.39242	0.417988	0.382244		1.91039e-05	0.000639875	0.382564	0.0705907
						0.236428	0.287956	2.37274	0.421454	0.337977		9.06492e-06	0.000527829	0.338241	0.040606		-0.0890679	0.0900191	2.40575	0.415671	0.381006		6.36766e-06	0.000644921	0.381328	0.023345		-0.343204	0.34236	2.39231	0.418007	0.382884		1.91057e-05	0.000639935	0.383204	0.0705906
						0.236885	0.28822	2.37269	0.421463	0.338505		9.07102e-06	0.000528181	0.338769	0.0406063		-0.0886111	0.0895639	2.40571	0.415678	0.381651		6.36761e-06	0.000644915	0.381973	0.023345		-0.343652	0.342816	2.3922	0.418026	0.383524		1.91075e-05	0.000639995	0.383844	0.0705904
						0.237342	0.288485	2.37264	0.421472	0.339033		9.0772e-06	0.000528537	0.339297	0.0406065		-0.0881542	0.0891087	2.40567	0.415684	0.382296		6.36756e-06	0.00064491	0.382618	0.023345		-0.3441	0.343273	2.39209	0.418045	0.384164		1.91092e-05	0.000640055	0.384484	0.0705903
						0.237799	0.288751	2.37258	0.421481	0.339561		9.08344e-06	0.000528898	0.339826	0.0406067		-0.0876974	0.0886534	2.40564	0.41569	0.382941		6.3675e-06	0.000644904	0.383263	0.023345		-0.344548	0.34373	2.39198	0.418064	0.384804		1.9111e-05	0.000640114	0.385124	0.0705902
						0.238256	0.289018	2.37253	0.42149	0.34009		9.11979e-06	0.000529264	0.340355	0.040741		-0.0872406	0.0881982	2.4056	0.415697	0.383586		6.36745e-06	0.000644899	0.383908	0.023345		-0.344997	0.344187	2.39187	0.418083	0.385444		1.91127e-05	0.000640173	0.385764	0.0705901
						0.238713	0.289285	2.37248	0.4215	0.340619		9.1567e-06	0.000529635	0.340884	0.0408773		-0.0867837	0.087743	2.40556	0.415703	0.38423		6.36739e-06	0.000644893	0.384553	0.023345		-0.345445	0.344644	2.39176	0.418102	0.386084		1.91144e-05	0.00064023	0.386404	0.0705899
						0.239169	0.289553	2.37243	0.421509	0.341149		9.16321e-06	0.00053001	0.341414	0.0408774		-0.0863269	0.0872879	2.40553	0.415709	0.384875		6.36734e-06	0.000644887	0.385198	0.023345		-0.345894	0.345101	2.39165	0.418121	0.386724		1.91161e-05	0.000640288	0.387044	0.0705898
						0.239626	0.289822	2.37238	0.421518	0.341679		9.1698e-06	0.000530391	0.341944	0.0408774		-0.0858701	0.0868327	2.40549	0.415716	0.38552		6.36388e-06	0.000644881	0.385843	0.0233325		-0.346343	0.345557	2.39154	0.418141	0.387364		1.91108e-05	0.000640345	0.387685	0.0705643
						0.240083	0.290091	2.37233	0.421527	0.342209		9.17646e-06	0.000530776	0.342475	0.0408774		-0.0854133	0.0863775	2.40545	0.415722	0.386165		6.25538e-06	0.000644871	0.386488	0.0229351		-0.346791	0.346014	2.39143	0.41816	0.388005		1.90652e-05	0.000640383	0.388325	0.0703914
						0.24054	0.290362	2.37228	0.421536	0.34274		9.1832e-06	0.000531167	0.343006	0.0408773		-0.0849564	0.0859224	2.40542	0.415728	0.38681		6.25392e-06	0.000644721	0.387132	0.022935		-0.34724	0.346471	2.39132	0.418179	0.388645		1.9042e-05	0.000640301	0.388965	0.0703149
						0.240997	0.290633	2.37222	0.421545	0.343271		8.98363e-06	0.000531564	0.343537	0.0399591		-0.0844996	0.0854674	2.40538	0.415735	0.387455		6.13811e-06	0.000644571	0.387777	0.0225156		-0.347689	0.346928	2.39121	0.418198	0.389285		1.90133e-05	0.000640279	0.389606	0.0702112
						0.241454	0.290904	2.37217	0.421554	0.343803		8.84005e-06	0.000531928	0.344069	0.0392936		-0.0840428	0.0850127	2.40534	0.415741	0.388099		6.12679e-06	0.00064455	0.388422	0.0224748		-0.348137	0.347385	2.3911	0.418217	0.389926		1.9015e-05	0.000640337	0.390246	0.0702111
						0.24191	0.291177	2.37212	0.421563	0.344335		8.86357e-06	0.000532265	0.344601	0.0393731		-0.0835859	0.084558	2.40531	0.415747	0.388744		6.12671e-06	0.000644542	0.389066	0.0224748		-0.348586	0.347842	2.391	0.418236	0.390566		1.90166e-05	0.000640394	0.390886	0.070211
						0.242367	0.29145	2.37207	0.421572	0.344867		8.74151e-06	0.000532607	0.345133	0.038806		-0.0831291	0.0841033	2.40527	0.415753	0.389388		6.12663e-06	0.000644533	0.389711	0.0224748		-0.349035	0.348298	2.39089	0.418255	0.391206		1.90183e-05	0.000640451	0.391527	0.0702109
						0.242824	0.291724	2.37202	0.421581	0.3454		8.74381e-06	0.000532964	0.345666	0.0387902		-0.0826723	0.0836486	2.40524	0.415759	0.390033		6.12655e-06	0.000644524	0.390355	0.0224748		-0.349484	0.348755	2.39078	0.418274	0.391847		1.90199e-05	0.000640507	0.392167	0.0702108
						0.243281	0.291998	2.37198	0.42159	0.345933		8.74969e-06	0.000533327	0.346199	0.0387899		-0.0822154	0.083194	2.4052	0.415765	0.390677		6.12646e-06	0.000644515	0.391	0.0224748		-0.349933	0.349212	2.39067	0.418293	0.392487		1.90215e-05	0.000640562	0.392808	0.0702106
						0.243738	0.292274	2.37193	0.421598	0.346466		8.75565e-06	0.000533695	0.346733	0.0387895		-0.0817586	0.0827393	2.40517	0.415771	0.391322		6.12638e-06	0.000644506	0.391644	0.0224748		-0.350382	0.349669	2.39056	0.418312	0.393128		1.90231e-05	0.000640618	0.393448	0.0702105
						0.244195	0.292549	2.37188	0.421607	0.347		8.76168e-06	0.000534068	0.347267	0.0387891		-0.0813018	0.0822847	2.40513	0.415778	0.391966		6.12629e-06	0.000644496	0.392289	0.0224748		-0.350831	0.350126	2.39045	0.418331	0.393769		1.90247e-05	0.000640672	0.394089	0.0702104
						0.244651	0.292826	2.37183	0.421616	0.347534		8.79639e-06	0.000534446	0.347801	0.0389152		-0.080845	0.0818301	2.4051	0.415784	0.392611		6.1224e-06	0.000644487	0.392933	0.0224609		-0.35128	0.350582	2.39034	0.41835	0.394409		1.90263e-05	0.000640727	0.39473	0.0702103
						0.245108	0.293103	2.37178	0.421625	0.348068		8.81414e-06	0.00053483	0.348336	0.0389658		-0.0803881	0.0813754	2.40506	0.41579	0.393255		6.00112e-06	0.000644473	0.393578	0.0220164		-0.351729	0.351039	2.39023	0.418369	0.39505		1.89432e-05	0.00064078	0.39537	0.0698976
						0.245565	0.293382	2.37173	0.421633	0.348603		8.82043e-06	0.00053522	0.348871	0.0389652		-0.0799313	0.0809209	2.40503	0.415796	0.3939		5.99974e-06	0.000644325	0.394222	0.0220164		-0.352179	0.351496	2.39013	0.418388	0.395691		1.88999e-05	0.000640669	0.396011	0.0697501
						0.246022	0.29366	2.37168	0.421642	0.349138		8.62992e-06	0.000535615	0.349406	0.0380955		-0.0794745	0.0804665	2.40499	0.415802	0.394544		5.88058e-06	0.000644177	0.394866	0.0215841		-0.352628	0.351953	2.39002	0.418407	0.396331		1.88524e-05	0.000640623	0.396652	0.06958
						0.246479	0.29394	2.37163	0.421651	0.349674		8.46936e-06	0.000535976	0.349942	0.0373615		-0.0790176	0.0800123	2.40496	0.415808	0.395188		5.86081e-06	0.000644145	0.395511	0.0215126		-0.353077	0.35241	2.38991	0.418426	0.396972		1.8854e-05	0.000640679	0.397292	0.0695799
						0.246936	0.29422	2.37158	0.421659	0.35021		8.47471e-06	0.000536309	0.350478	0.0373619		-0.0785608	0.0795582	2.40492	0.415814	0.395833		5.8607e-06	0.000644132	0.396155	0.0215126		-0.353526	0.352867	2.3898	0.418444	0.397613		1.88556e-05	0.000640734	0.397933	0.0695797
						0.247392	0.294501	2.37154	0.421668	0.350746		8.48014e-06	0.000536647	0.351015	0.0373623		-0.078104	0.0791041	2.40489	0.415819	0.396477		5.86058e-06	0.000644119	0.396799	0.0215127		-0.353975	0.353323	2.3897	0.418463	0.398253		1.88572e-05	0.000640789	0.398574	0.0695796
						0.247849	0.294783	2.37149	0.421676	0.351283		8.50594e-06	0.000536989	0.351551	0.0374521		-0.0776472	0.07865	2.40486	0.415825	0.397121		5.86046e-06	0.000644105	0.397443	0.0215127		-0.354425	0.35378	2.38959	0.418482	0.398894		1.88588e-05	0.000640843	0.399215	0.0695795
						0.248306	0.295065	2.37144	0.421685	0.35182		8.51403e-06	0.000537336	0.352088	0.0374635		-0.0771903	0.0781959	2.40482	0.415831	0.397765		5.86034e-06	0.000644092	0.398087	0.0215127		-0.354874	0.354237	2.38948	0.418501	0.399535		1.88603e-05	0.000640897	0.399856	0.0695794
						0.248763	0.295348	2.37139	0.421693	0.352357		8.51967e-06	0.000537688	0.352626	0.0374638		-0.0767335	0.0777419	2.40479	0.415837	0.398409		5.86021e-06	0.000644078	0.398731	0.0215127		-0.355324	0.354694	2.38937	0.41852	0.400176		1.88619e-05	0.000640951	0.400496	0.0695792
						0.24922	0.295632	2.37134	0.421702	0.352895		8.52538e-06	0.000538045	0.353164	0.037464		-0.0762767	0.0772878	2.40475	0.415843	0.399053		5.86009e-06	0.000644064	0.399375	0.0215127		-0.355773	0.355151	2.38927	0.418539	0.400817		1.88634e-05	0.000641004	0.401137	0.0695791
						0.249677	0.295916	2.3713	0.42171	0.353433		8.53117e-06	0.000538407	0.353702	0.0374642		-0.0758198	0.0768338	2.40472	0.415849	0.399697		5.8558e-06	0.000644049	0.400019	0.0214974		-0.356223	0.355608	2.38916	0.418558	0.401458		1.88649e-05	0.000641057	0.401778	0.069579
						0.250133	0.296201	2.37125	0.421719	0.353971		8.53521e-06	0.000538775	0.354241	0.0374564		-0.075363	0.0763798	2.40469	0.415855	0.400341		5.72286e-06	0.000644031	0.400663	0.02101		-0.356673	0.356064	2.38905	0.418576	0.402099		1.87697e-05	0.000641109	0.40242	0.0692221
						0.25059	0.296487	2.3712	0.421727	0.35451		8.41796e-06	0.000539147	0.35478	0.0369163		-0.0749062	0.0759259	2.40465	0.41586	0.400985		5.72153e-06	0.000643883	0.401307	0.0210099		-0.357122	0.356521	2.38894	0.418595	0.40274		1.86875e-05	0.000640989	0.403061	0.0689318
						0.251047	0.296773	2.37115	0.421736	0.355049		8.25536e-06	0.000539541	0.355319	0.0361769		-0.0744493	0.0754721	2.40462	0.415866	0.401629		5.6034e-06	0.000643734	0.401951	0.0205809		-0.357572	0.356978	2.38884	0.418614	0.403381		1.86217e-05	0.000640912	0.403702	0.0686976
						0.251504	0.29706	2.37111	0.421744	0.355589		8.10261e-06	0.000539899	0.355859	0.0354839		-0.0739925	0.0750186	2.40459	0.415872	0.402273		5.57196e-06	0.000643689	0.402595	0.0204669		-0.358022	0.357435	2.38873	0.418633	0.404022		1.86233e-05	0.000640967	0.404342	0.0686975
						0.251961	0.297348	2.37106	0.421752	0.356129		8.10755e-06	0.000540227	0.356399	0.035484		-0.0735357	0.0745651	2.40456	0.415877	0.402917		5.5718e-06	0.00064367	0.403238	0.0204669		-0.358471	0.357892	2.38862	0.418651	0.404663		1.86249e-05	0.000641022	0.404983	0.0686973
						0.252418	0.297636	2.37101	0.42176	0.356669		8.11257e-06	0.000540561	0.356939	0.035484		-0.0730789	0.0741117	2.40452	0.415883	0.40356		5.57164e-06	0.000643651	0.403882	0.0204669		-0.358921	0.358349	2.38852	0.41867	0.405304		1.86264e-05	0.000641076	0.405625	0.0686972
						0.252874	0.297925	2.37097	0.421768	0.357209		8.11765e-06	0.000540899	0.35748	0.035484		-0.072622	0.0736582	2.40449	0.415888	0.404204		5.57148e-06	0.000643632	0.404526	0.0204669		-0.359371	0.358805	2.38841	0.418688	0.405945		1.8628e-05	0.00064113	0.406266	0.0686971
						0.253331	0.298215	2.37092	0.421777	0.35775		8.12279e-06	0.000541243	0.358021	0.035484		-0.0721652	0.0732048	2.40446	0.415894	0.404848		5.57131e-06	0.000643612	0.405169	0.0204669		-0.35982	0.359262	2.3883	0.418707	0.406586		1.86295e-05	0.000641184	0.406907	0.0686969
						0.253788	0.298505	2.37088	0.421785	0.358292		8.12974e-06	0.000541591	0.358562	0.0354915		-0.0717084	0.0727515	2.40443	0.415899	0.405491		5.57114e-06	0.000643592	0.405813	0.0204669		-0.36027	0.359719	2.3882	0.418726	0.407227		1.8631e-05	0.000641237	0.407548	0.0686968
						0.254245	0.298796	2.37083	0.421793	0.358833		8.13797e-06	0.000541945	0.359104	0.0355042		-0.0712515	0.0722981	2.40439	0.415905	0.406135		5.57097e-06	0.000643572	0.406457	0.0204669		-0.36072	0.360176	2.38809	0.418744	0.407869		1.86325e-05	0.00064129	0.408189	0.0686967
						0.254702	0.299087	2.37079	0.421801	0.359375		8.14333e-06	0.000542304	0.359646	0.0355041		-0.0707947	0.0718448	2.40436	0.415911	0.406778		5.5663e-06	0.000643551	0.4071	0.0204505		-0.36117	0.360633	2.38799	0.418763	0.40851		1.8634e-05	0.000641343	0.408831	0.0686965
						0.255159	0.29938	2.37074	0.421809	0.359917		8.14876e-06	0.000542669	0.360189	0.0355039		-0.0703379	0.0713915	2.40433	0.415916	0.407422		5.42277e-06	0.000643526	0.407744	0.0199239		-0.361621	0.36109	2.38788	0.418782	0.409151		1.85376e-05	0.000641395	0.409472	0.0683357
						0.255615	0.299672	2.3707	0.421817	0.36046		8.15427e-06	0.000543039	0.360732	0.0355037		-0.069881	0.0709383	2.4043	0.415922	0.408065		5.42149e-06	0.000643376	0.408387	0.0199238		-0.362071	0.361546	2.38777	0.4188	0.409793		1.84042e-05	0.00064127	0.410113	0.0678571
						0.256072	0.299966	2.37065	0.421825	0.361003		7.98686e-06	0.000543414	0.361275	0.0347507		-0.0694242	0.0704853	2.40427	0.415927	0.408709		5.30926e-06	0.000643225	0.40903	0.019516		-0.362521	0.362003	2.38767	0.418819	0.410434		1.83204e-05	0.000641149	0.410754	0.0675608
						0.256529	0.30026	2.3706	0.421833	0.361547		7.84569e-06	0.000543753	0.361818	0.0341152		-0.0689674	0.0700324	2.40424	0.415932	0.409352		5.26237e-06	0.000643163	0.409674	0.0193455		-0.362971	0.36246	2.38756	0.418837	0.411075		1.8322e-05	0.000641206	0.411396	0.0675607
						0.256986	0.300555	2.37056	0.421841	0.36209		7.84358e-06	0.000544061	0.362362	0.0340868		-0.0685106	0.0695797	2.40421	0.415938	0.409995		5.26216e-06	0.000643136	0.410317	0.0193455		-0.363421	0.362917	2.38746	0.418855	0.411716		1.83235e-05	0.000641261	0.412037	0.0675605
						0.257443	0.300851	2.37052	0.421849	0.362634		7.84491e-06	0.000544372	0.362907	0.0340731		-0.0680537	0.069127	2.40418	0.415943	0.410638		5.26195e-06	0.00064311	0.41096	0.0193455		-0.363871	0.363374	2.38736	0.418873	0.412358		1.83251e-05	0.000641317	0.412678	0.0675604
						0.257899	0.301147	2.37047	0.421857	0.363179		7.84958e-06	0.000544689	0.363451	0.0340735		-0.0675969	0.0686744	2.40415	0.415948	0.411281		5.26173e-06	0.000643083	0.411603	0.0193456		-0.364321	0.363831	2.38725	0.418892	0.412999		1.83266e-05	0.000641372	0.41332	0.0675602
						0.258356	0.301443	2.37043	0.421865	0.363723		7.76264e-06	0.00054501	0.363996	0.0336763		-0.0671401	0.0682217	2.40412	0.415953	0.411924		5.26151e-06	0.000643055	0.412246	0.0193456		-0.364771	0.364287	2.38715	0.41891	0.41364		1.83281e-05	0.000641427	0.413961	0.0675601
						0.258813	0.301741	2.37038	0.421873	0.364268		7.74221e-06	0.000545351	0.364541	0.0335666		-0.0666832	0.0677692	2.40409	0.415959	0.412568		5.26129e-06	0.000643027	0.412889	0.0193456		-0.365221	0.364744	2.38704	0.418928	0.414282		1.83297e-05	0.000641482	0.414602	0.0675599
						0.25927	0.302039	2.37034	0.42188	0.364814		7.7471e-06	0.000545701	0.365087	0.0335663		-0.0662264	0.0673166	2.40405	0.415964	0.413211		5.26106e-06	0.000642998	0.413532	0.0193456		-0.365672	0.365201	2.38694	0.418947	0.414923		1.83312e-05	0.000641536	0.415244	0.0675598
						0.259727	0.302337	2.3703	0.421888	0.365359		7.75197e-06	0.000546057	0.365633	0.0335655		-0.0657696	0.0668641	2.40402	0.415969	0.413854		5.25603e-06	0.000642969	0.414175	0.019328		-0.366122	0.365658	2.38683	0.418965	0.415565		1.83327e-05	0.000641589	0.415885	0.0675596
						0.260184	0.302636	2.37025	0.421896	0.365906		7.74513e-06	0.000546419	0.366179	0.0335137		-0.0653128	0.0664117	2.40399	0.415974	0.414497		5.10292e-06	0.000642936	0.414818	0.0187659		-0.366572	0.366115	2.38673	0.418983	0.416206		1.82454e-05	0.000641643	0.416527	0.0672325
						0.26064	0.302936	2.37021	0.421903	0.366452		7.75023e-06	0.000546786	0.366725	0.0335132		-0.0648559	0.0659593	2.40396	0.41598	0.415139		5.10168e-06	0.000642781	0.415461	0.0187659		-0.367023	0.366572	2.38663	0.419002	0.416848		1.80474e-05	0.000641521	0.417169	0.0665156
						0.261097	0.303236	2.37017	0.421911	0.366999		7.59203e-06	0.00054716	0.367272	0.0328068		-0.0643991	0.0655071	2.40393	0.415985	0.415782		5.00086e-06	0.000642625	0.416104	0.0183995		-0.367473	0.367028	2.38652	0.41902	0.417489		1.79455e-05	0.000641337	0.41781	0.0661588
						0.261554	0.303538	2.37012	0.421919	0.367546		7.45861e-06	0.000547495	0.36782	0.0322105		-0.0639423	0.0650551	2.40391	0.41599	0.416425		4.93407e-06	0.000642541	0.416746	0.0181561		-0.367924	0.367485	2.38642	0.419038	0.418131		1.79471e-05	0.000641396	0.418451	0.0661586
						0.262011	0.303839	2.37008	0.421926	0.368093		7.46278e-06	0.000547797	0.368367	0.0322107		-0.0634854	0.0646033	2.40388	0.415995	0.417067		4.93379e-06	0.000642505	0.417389	0.0181561		-0.368374	0.367942	2.38632	0.419056	0.418772		1.79487e-05	0.000641455	0.419093	0.0661585
						0.262468	0.304142	2.37004	0.421934	0.368641		7.46702e-06	0.000548104	0.368915	0.0322109		-0.0630286	0.0641515	2.40385	0.416	0.41771		4.93352e-06	0.000642468	0.418031	0.0181562		-0.368824	0.368399	2.38622	0.419074	0.419414		1.79503e-05	0.000641514	0.419734	0.0661583
						0.262925	0.304445	2.37	0.421941	0.369189		7.46162e-06	0.000548416	0.369464	0.0321694		-0.0625718	0.0636997	2.40382	0.416004	0.418352		4.93324e-06	0.000642431	0.418674	0.0181562		-0.369274	0.368856	2.38611	0.419092	0.420055		1.79519e-05	0.000641572	0.420376	0.0661581
						0.263381	0.304748	2.36996	0.421949	0.369738		7.45026e-06	0.000548733	0.370012	0.0321018		-0.0621149	0.063248	2.40379	0.416009	0.418995		4.93295e-06	0.000642392	0.419316	0.0181562		-0.369725	0.369312	2.38601	0.41911	0.420697		1.79534e-05	0.00064163	0.421018	0.0661579
						0.263838	0.305052	2.36991	0.421956	0.370286		7.45466e-06	0.000549055	0.370561	0.032102		-0.0616581	0.0627964	2.40376	0.416014	0.419637		4.93266e-06	0.000642353	0.419958	0.0181563		-0.370175	0.369769	2.38591	0.419127	0.421338		1.7955e-05	0.000641687	0.421659	0.0661578
						0.264295	0.305357	2.36987	0.421964	0.370836		7.45913e-06	0.000549382	0.37111	0.0321021		-0.0612013	0.0623448	2.40373	0.416019	0.42028		4.93236e-06	0.000642313	0.420601	0.0181563		-0.370626	0.370226	2.38581	0.419145	0.42198		1.79565e-05	0.000641744	0.422301	0.0661576
						0.264752	0.305662	2.36983	0.421971	0.371385		7.46367e-06	0.000549715	0.37166	0.0321022		-0.0607445	0.0618933	2.40371	0.416024	0.420922		4.92699e-06	0.000642273	0.421243	0.0181377		-0.371077	0.370683	2.3857	0.419163	0.422622		1.79581e-05	0.000641801	0.422943	0.0661574
						0.265209	0.305967	2.36979	0.421979	0.371935		7.46827e-06	0.000550053	0.37221	0.0321022		-0.0602876	0.0614418	2.40368	0.416029	0.421564		4.76526e-06	0.000642227	0.421885	0.0175435		-0.371528	0.37114	2.3856	0.419181	0.423264		1.78903e-05	0.000641857	0.423584	0.065902
						0.265666	0.306274	2.36975	0.421986	0.372485		7.45552e-06	0.000550396	0.37276	0.0320274		-0.0598308	0.0609904	2.40365	0.416034	0.422206		4.76404e-06	0.000642065	0.422527	0.0175435		-0.371978	0.371597	2.3855	0.419199	0.423905		1.76109e-05	0.000641756	0.424226	0.064883
						0.266122	0.306581	2.36971	0.421993	0.373035		7.19136e-06	0.000550749	0.37331	0.0308729		-0.059374	0.0605393	2.40362	0.416039	0.422848		4.68098e-06	0.0006419	0.423169	0.017242		-0.372429	0.372053	2.3854	0.419217	0.424547		1.749e-05	0.000641472	0.424868	0.064466
						0.266579	0.306888	2.36966	0.422001	0.373586		7.06001e-06	0.00055108	0.373861	0.0302908		-0.0589171	0.0600883	2.4036	0.416043	0.42349		4.58894e-06	0.00064179	0.423811	0.0169059		-0.37288	0.37251	2.3853	0.419234	0.425189		1.74917e-05	0.000641537	0.425509	0.0644657
						0.267036	0.307197	2.36963	0.422008	0.374137		7.06382e-06	0.000551377	0.374413	0.0302908		-0.0584603	0.0596375	2.40357	0.416048	0.424132		4.5886e-06	0.00064174	0.424453	0.016906		-0.37333	0.372967	2.3852	0.419252	0.42583		1.74934e-05	0.000641602	0.426151	0.0644655
						0.267493	0.307505	2.36959	0.422015	0.374688		7.0677e-06	0.000551679	0.374964	0.0302908		-0.0580035	0.0591868	2.40354	0.416052	0.424774		4.58824e-06	0.000641689	0.425095	0.016906		-0.37378	0.373424	2.3851	0.419269	0.426472		1.74951e-05	0.000641666	0.426793	0.0644653
						0.26795	0.307815	2.36955	0.422022	0.37524		7.07163e-06	0.000551986	0.375516	0.0302908		-0.0575466	0.0587362	2.40352	0.416057	0.425416		4.58788e-06	0.000641637	0.425736	0.0169061		-0.374231	0.373881	2.385	0.419287	0.427113		1.74968e-05	0.00064173	0.427434	0.0644651
						0.268407	0.308124	2.36951	0.422029	0.375792		7.07563e-06	0.000552299	0.376068	0.0302908		-0.0570898	0.0582856	2.40349	0.416062	0.426057		4.58751e-06	0.000641584	0.426378	0.0169061		-0.374682	0.374338	2.3849	0.419304	0.427755		1.74984e-05	0.000641794	0.428076	0.0644649
						0.268863	0.308435	2.36947	0.422036	0.376344		7.07069e-06	0.000552617	0.376621	0.0302522		-0.056633	0.0578352	2.40346	0.416066	0.426699		4.58714e-06	0.00064153	0.42702	0.0169061		-0.375133	0.374794	2.3848	0.419322	0.428397		1.75001e-05	0.000641857	0.428718	0.0644646
						0.26932	0.308746	2.36943	0.422043	0.376897		7.04467e-06	0.00055294	0.377173	0.0301232		-0.0561762	0.0573847	2.40344	0.416071	0.42734		4.58675e-06	0.000641474	0.427661	0.0169062		-0.375583	0.375251	2.3847	0.419339	0.429039		1.75017e-05	0.00064192	0.42936	0.0644644
						0.269777	0.309057	2.36939	0.42205	0.37745		7.04883e-06	0.000553269	0.377726	0.0301231		-0.0557193	0.0569344	2.40341	0.416075	0.427982		4.58106e-06	0.000641418	0.428302	0.0168867		-0.376034	0.375708	2.3846	0.419357	0.429681		1.75034e-05	0.000641982	0.430002	0.0644642
						0.270234	0.309369	2.36935	0.422057	0.378003		7.05306e-06	0.000553604	0.37828	0.030123		-0.0552625	0.0564842	2.40338	0.41608	0.428623		4.41161e-06	0.000641356	0.428944	0.0162636		-0.376485	0.376165	2.3845	0.419374	0.430323		1.74673e-05	0.000642043	0.430644	0.0643251
						0.270691	0.309682	2.36931	0.422064	0.378557		7.05736e-06	0.000553944	0.378834	0.0301228		-0.0548057	0.056034	2.40336	0.416084	0.429265		4.41038e-06	0.000641181	0.429585	0.0162635		-0.376937	0.376622	2.38441	0.419392	0.430965		1.7081e-05	0.000642	0.431286	0.0629066
						0.271148	0.309995	2.36927	0.422071	0.379111		6.9206e-06	0.00055429	0.379388	0.0295206		-0.0543488	0.0555841	2.40333	0.416089	0.429906		4.3525e-06	0.000641002	0.430226	0.0160546		-0.377388	0.377079	2.38431	0.419409	0.431607		1.69387e-05	0.000641545	0.431928	0.0624271
						0.271604	0.310309	2.36923	0.422078	0.379665		6.80518e-06	0.000554595	0.379942	0.0290124		-0.053892	0.0551344	2.40331	0.416093	0.430547		4.22878e-06	0.000640858	0.430867	0.0156017		-0.377838	0.377535	2.38421	0.419426	0.432248		1.69406e-05	0.00064162	0.432569	0.0624268
						0.272061	0.310624	2.36919	0.422085	0.380219		6.77352e-06	0.000554864	0.380497	0.0288634		-0.0534352	0.054685	2.40328	0.416097	0.431188		4.22834e-06	0.000640789	0.431508	0.0156018		-0.378289	0.377992	2.38412	0.419443	0.43289		1.69425e-05	0.000641695	0.433211	0.0624265
						0.272518	0.310939	2.36915	0.422092	0.380774		6.76208e-06	0.000555137	0.381052	0.0288005		-0.0529784	0.0542356	2.40326	0.416102	0.431828		4.22789e-06	0.000640718	0.432149	0.0156018		-0.378739	0.378449	2.38402	0.41946	0.433532		1.69444e-05	0.000641769	0.433853	0.0624262
						0.272975	0.311254	2.36912	0.422099	0.381329		6.76161e-06	0.000555415	0.381607	0.028784		-0.0525215	0.0537864	2.40323	0.416106	0.432469		4.22743e-06	0.000640646	0.432789	0.0156019		-0.37919	0.378906	2.38392	0.419477	0.434173		1.69463e-05	0.000641843	0.434494	0.0624259
						0.273432	0.31157	2.36908	0.422105	0.381885		6.66787e-06	0.000555699	0.382163	0.0283705		-0.0520647	0.0533372	2.40321	0.41611	0.43311		4.22696e-06	0.000640573	0.43343	0.015602		-0.379641	0.379363	2.38383	0.419494	0.434815		1.69481e-05	0.000641917	0.435136	0.0624256
						0.273889	0.311886	2.36904	0.422112	0.382441		6.67159e-06	0.000556012	0.382719	0.0283703		-0.0516079	0.0528882	2.40319	0.416114	0.43375		4.22648e-06	0.000640497	0.434071	0.015602		-0.380092	0.37982	2.38373	0.419511	0.435457		1.695e-05	0.000641989	0.435778	0.0624253
						0.274345	0.312203	2.369	0.422119	0.382997		6.67537e-06	0.000556332	0.383275	0.0283701		-0.051151	0.0524393	2.40316	0.416119	0.434391		4.22598e-06	0.00064042	0.434711	0.0156021		-0.380543	0.380276	2.38363	0.419527	0.436099		1.69518e-05	0.000642062	0.43642	0.062425
						0.274802	0.312521	2.36896	0.422125	0.383553		6.66878e-06	0.000556657	0.383831	0.0283255		-0.0506942	0.0519904	2.40314	0.416123	0.435031		4.21997e-06	0.000640341	0.435351	0.0155818		-0.380994	0.380733	2.38354	0.419544	0.436741		1.69536e-05	0.000642134	0.437062	0.0624247
						0.275259	0.312839	2.36893	0.422132	0.38411		6.63205e-06	0.000556989	0.384388	0.0281527		-0.0502374	0.0515417	2.40311	0.416127	0.435672		4.04363e-06	0.000640257	0.435992	0.0149326		-0.381445	0.38119	2.38344	0.419561	0.437383		1.69554e-05	0.000642205	0.437704	0.0624244
						0.275716	0.313158	2.36889	0.422139	0.384667		6.63599e-06	0.000557326	0.384945	0.0281524		-0.0497805	0.0510931	2.40309	0.416131	0.436312		4.04238e-06	0.000640061	0.436632	0.0149326		-0.381897	0.381647	2.38335	0.419578	0.438026		1.64385e-05	0.000642276	0.438347	0.0605144
						0.276173	0.313477	2.36885	0.422145	0.385224		6.508e-06	0.00055767	0.385503	0.0275924		-0.0493237	0.0506448	2.40307	0.416135	0.436952		4.01864e-06	0.000639861	0.437272	0.0148495		-0.382348	0.382104	2.38325	0.419595	0.438668		1.62582e-05	0.000641527	0.438989	0.0599208
						0.27663	0.313797	2.36882	0.422152	0.385782		6.39994e-06	0.00055797	0.386061	0.0271197		-0.0488669	0.0501968	2.40304	0.416139	0.437592		3.85524e-06	0.000639672	0.437912	0.0142499		-0.382799	0.382561	2.38316	0.419611	0.439309		1.62605e-05	0.00064162	0.43963	0.0599203
						0.277086	0.314117	2.36878	0.422158	0.38634		6.40301e-06	0.000558234	0.386619	0.0271198		-0.0484101	0.049749	2.40302	0.416143	0.438231		3.85468e-06	0.000639576	0.438551	0.01425		-0.383249	0.383017	2.38307	0.419627	0.439951		1.62627e-05	0.000641713	0.440272	0.0599198
						0.277543	0.314438	2.36874	0.422165	0.386898		6.40612e-06	0.000558502	0.387177	0.02712		-0.0479532	0.0493014	2.403	0.416147	0.438871		3.8541e-06	0.000639477	0.439191	0.0142501		-0.3837	0.383474	2.38297	0.419644	0.440593		1.62649e-05	0.000641806	0.440914	0.0599194
						0.278	0.314759	2.36871	0.422171	0.387456		6.3647e-06	0.000558775	0.387736	0.0269315		-0.0474964	0.0488539	2.40298	0.416151	0.43951		3.85352e-06	0.000639377	0.43983	0.0142502		-0.384151	0.383931	2.38288	0.41966	0.441235		1.62671e-05	0.000641898	0.441555	0.0599189
						0.278457	0.315081	2.36867	0.422177	0.388015		6.35189e-06	0.000559053	0.388295	0.0268639		-0.0470396	0.0484066	2.40295	0.416155	0.44015		3.85292e-06	0.000639273	0.440469	0.0142502		-0.384601	0.384388	2.38279	0.419676	0.441876		1.62693e-05	0.000641989	0.442197	0.0599184
						0.278914	0.315403	2.36864	0.422184	0.388574		6.35514e-06	0.000559337	0.388854	0.026864		-0.0465827	0.0479594	2.40293	0.416158	0.440789		3.8523e-06	0.000639167	0.441109	0.0142503		-0.385053	0.384845	2.3827	0.419692	0.442518		1.62715e-05	0.000642079	0.442839	0.059918
						0.27937	0.315726	2.3686	0.42219	0.389133		6.35845e-06	0.000559626	0.389413	0.0268641		-0.0461259	0.0475124	2.40291	0.416162	0.441428		3.85167e-06	0.000639059	0.441748	0.0142504		-0.385504	0.385302	2.38261	0.419709	0.44316		1.62736e-05	0.000642169	0.443482	0.0599175
						0.279827	0.316049	2.36857	0.422196	0.389693		6.36181e-06	0.00055992	0.389973	0.0268642		-0.0456691	0.0470655	2.40289	0.416166	0.442067		3.84532e-06	0.000638947	0.442387	0.0142294		-0.385955	0.385758	2.38251	0.419725	0.443803		1.62757e-05	0.000642258	0.444124	0.0599171
						0.280284	0.316373	2.36853	0.422203	0.390253		6.33171e-06	0.00056022	0.390533	0.0267228		-0.0452123	0.0466188	2.40286	0.41617	0.442706		3.66287e-06	0.000638829	0.443026	0.0135568		-0.386407	0.386215	2.38242	0.419741	0.444445		1.62779e-05	0.000642347	0.444766	0.0599166
						0.280741	0.316697	2.36849	0.422209	0.390813		6.25568e-06	0.000560536	0.391093	0.026387		-0.0447554	0.0461722	2.40284	0.416174	0.443345		3.66155e-06	0.000638602	0.443664	0.0135567		-0.386858	0.386672	2.38233	0.419757	0.445087		1.5666e-05	0.000642434	0.445408	0.0576567
						0.281198	0.317022	2.36846	0.422215	0.391374		6.09312e-06	0.000560877	0.391654	0.0256857		-0.0442986	0.045726	2.40282	0.416177	0.443984		3.66019e-06	0.00063837	0.444303	0.0135566		-0.38731	0.387129	2.38224	0.419773	0.44573		1.53665e-05	0.000641331	0.44605	0.0566517
						0.281655	0.317348	2.36843	0.422221	0.391935		5.99227e-06	0.000561173	0.392215	0.0252472		-0.0438418	0.0452801	2.4028	0.416181	0.444622		3.49277e-06	0.000638132	0.444941	0.0129413		-0.38776	0.387586	2.38215	0.419788	0.446371		1.53694e-05	0.000641462	0.446692	0.0566508
						0.282111	0.317673	2.36839	0.422227	0.392496		5.99504e-06	0.000561432	0.392777	0.0252473		-0.0433849	0.0448345	2.40278	0.416184	0.44526		3.46911e-06	0.000637984	0.445579	0.0128567		-0.38821	0.388043	2.38206	0.419804	0.447012		1.53723e-05	0.000641593	0.447333	0.0566499
						0.282568	0.318	2.36836	0.422233	0.393057		5.99786e-06	0.000561695	0.393338	0.0252473		-0.0429281	0.0443892	2.40276	0.416188	0.445898		3.46839e-06	0.000637845	0.446217	0.0128568		-0.388661	0.388499	2.38198	0.419819	0.447654		1.53752e-05	0.000641723	0.447975	0.056649
						0.283025	0.318327	2.36832	0.422239	0.393619		6.00074e-06	0.000561963	0.3939	0.0252474		-0.0424713	0.0439441	2.40274	0.416191	0.446536		3.46764e-06	0.000637701	0.446855	0.0128569		-0.389111	0.388956	2.38189	0.419835	0.448296		1.53781e-05	0.000641852	0.448617	0.0566482
						0.283482	0.318654	2.36829	0.422245	0.394181		6.00367e-06	0.000562237	0.394462	0.0252474		-0.0420144	0.0434991	2.40272	0.416195	0.447174		3.46687e-06	0.000637554	0.447493	0.012857		-0.389562	0.389413	2.3818	0.41985	0.448938		1.53809e-05	0.000641981	0.449259	0.0566473
						0.283939	0.318982	2.36826	0.422251	0.394743		5.94557e-06	0.000562517	0.395024	0.0249906		-0.0415576	0.0430544	2.4027	0.416198	0.447811		3.46607e-06	0.000637402	0.44813	0.0128571		-0.390013	0.38987	2.38172	0.419865	0.44958		1.53837e-05	0.000642108	0.449901	0.0566465
						0.284396	0.31931	2.36822	0.422257	0.395306		5.94019e-06	0.000562802	0.395587	0.0249554		-0.0411008	0.0426099	2.40268	0.416202	0.448449		3.46526e-06	0.000637246	0.448767	0.0128572		-0.390465	0.390327	2.38163	0.419881	0.450222		1.53865e-05	0.000642234	0.450543	0.0566456
						0.284852	0.319639	2.36819	0.422263	0.395868		5.94325e-06	0.000563093	0.39615	0.0249553		-0.040644	0.0421656	2.40266	0.416205	0.449086		3.45856e-06	0.000637086	0.449404	0.0128356		-0.390916	0.390783	2.38154	0.419896	0.450864		1.53893e-05	0.000642359	0.451185	0.0566448
						0.285309	0.319968	2.36816	0.422269	0.396432		5.94637e-06	0.000563389	0.396713	0.0249553		-0.0401871	0.0417215	2.40264	0.416209	0.449723		3.2707e-06	0.000636917	0.450041	0.0121416		-0.391368	0.39124	2.38145	0.419912	0.451506		1.5392e-05	0.000642482	0.451828	0.0566439
						0.285766	0.320298	2.36812	0.422275	0.396995		5.94955e-06	0.000563692	0.397277	0.0249552		-0.0397303	0.0412777	2.40262	0.416212	0.45036		3.26925e-06	0.000636641	0.450678	0.0121415		-0.391819	0.391697	2.38137	0.419927	0.452149		1.45693e-05	0.000642603	0.45247	0.0536062
						0.286223	0.320628	2.36809	0.422281	0.397559		5.84058e-06	0.000564001	0.397841	0.0244847		-0.0392735	0.0408343	2.4026	0.416215	0.450997		3.26777e-06	0.000636357	0.451315	0.0121414		-0.392271	0.392154	2.38128	0.419941	0.452791		1.40071e-05	0.000640411	0.453112	0.0517141
						0.28668	0.320959	2.36806	0.422287	0.398123		5.711e-06	0.000564263	0.398405	0.0239304		-0.0388166	0.0403913	2.40258	0.416218	0.451633		3.15674e-06	0.000636066	0.451951	0.0117343		-0.39272	0.392611	2.3812	0.419955	0.453432		1.40119e-05	0.000640662	0.453752	0.0517116
						0.287137	0.32129	2.36803	0.422293	0.398687		5.6708e-06	0.000564484	0.398969	0.0237526		-0.0383598	0.0399487	2.40257	0.416222	0.452269		3.07304e-06	0.000635826	0.452587	0.0114275		-0.393169	0.393068	2.38113	0.419969	0.454072		1.40168e-05	0.000640914	0.454393	0.0517091
						0.287593	0.321621	2.36799	0.422298	0.399251		5.59067e-06	0.000564712	0.399534	0.0234076		-0.037903	0.0395065	2.40255	0.416225	0.452905		3.07211e-06	0.000635624	0.453223	0.0114276		-0.393619	0.393524	2.38105	0.419984	0.454713		1.40216e-05	0.000641168	0.455034	0.0517065
						0.28805	0.321953	2.36796	0.422304	0.399816		5.59327e-06	0.000564976	0.400099	0.0234075		-0.0374461	0.0390645	2.40253	0.416228	0.45354		3.07114e-06	0.000635416	0.453858	0.0114278		-0.394069	0.393981	2.38097	0.419998	0.455355		1.40265e-05	0.000641421	0.455675	0.051704
						0.288507	0.322286	2.36793	0.42231	0.400381		5.59592e-06	0.000565245	0.400664	0.0234074		-0.0369893	0.0386229	2.40251	0.416231	0.454176		3.07015e-06	0.0006352	0.454493	0.0114279		-0.394519	0.394438	2.38089	0.420012	0.455996		1.40313e-05	0.000641673	0.456317	0.0517014
						0.288964	0.322619	2.3679	0.422315	0.400946		5.59863e-06	0.000565521	0.401229	0.0234074		-0.0365325	0.0381815	2.4025	0.416234	0.454811		3.06912e-06	0.000634978	0.455129	0.0114281		-0.39497	0.394895	2.38081	0.420026	0.456638		1.40361e-05	0.000641923	0.456959	0.0516989
						0.289421	0.322952	2.36787	0.422321	0.401512		5.59191e-06	0.000565802	0.401795	0.0233676		-0.0360757	0.0377405	2.40248	0.416237	0.455446		3.06806e-06	0.000634749	0.455763	0.0114283		-0.39542	0.395352	2.38073	0.42004	0.45728		1.40408e-05	0.00064217	0.457601	0.0516964
						0.289878	0.323286	2.36784	0.422326	0.402078		5.5277e-06	0.00056609	0.402361	0.0230876		-0.0356188	0.0372998	2.40246	0.41624	0.456081		3.06096e-06	0.000634512	0.456398	0.0114061		-0.395872	0.395809	2.38065	0.420054	0.457922		1.40454e-05	0.000642412	0.458243	0.0516939
						0.290334	0.32362	2.36781	0.422332	0.402644		5.53053e-06	0.000566383	0.402927	0.0230874		-0.035162	0.0368594	2.40244	0.416243	0.456715		2.86833e-06	0.000634264	0.457032	0.0106925		-0.396323	0.396265	2.38057	0.420068	0.458564		1.40499e-05	0.000642649	0.458885	0.0516915
						0.290791	0.323955	2.36778	0.422337	0.40321		5.53342e-06	0.000566684	0.403493	0.0230872		-0.0347052	0.0364194	2.40243	0.416246	0.45735		2.86668e-06	0.000633908	0.457667	0.0106923		-0.396775	0.396722	2.38049	0.420082	0.459207		1.2394e-05	0.00064288	0.459528	0.045583
						0.291248	0.32429	2.36774	0.422343	0.403777		5.43232e-06	0.00056699	0.40406	0.0226532		-0.0342483	0.03598	2.40241	0.416249	0.457983		2.86498e-06	0.000633541	0.4583	0.0106922		-0.397228	0.397179	2.38042	0.420094	0.45985		1.08096e-05	0.000641127	0.46017	0.0398644
						0.291705	0.324626	2.36771	0.422348	0.404344		5.34688e-06	0.000567248	0.404627	0.0222867		-0.0337915	0.035541	2.40239	0.416252	0.458617		2.83079e-06	0.000633163	0.458934	0.0105709		-0.397678	0.397636	2.38036	0.420105	0.460491		1.08149e-05	0.00064161	0.460812	0.0398539
						0.292162	0.324962	2.36768	0.422354	0.404911		5.34896e-06	0.000567465	0.405195	0.0222869		-0.0333347	0.0351026	2.40238	0.416255	0.45925		2.66773e-06	0.000632789	0.459567	0.00996787		-0.398128	0.398093	2.3803	0.420116	0.461132		1.08195e-05	0.000642029	0.461453	0.0398448
						0.292619	0.325299	2.36765	0.422359	0.405478		5.28656e-06	0.000567686	0.405762	0.0220183		-0.0328779	0.0346647	2.40236	0.416257	0.459883		2.66652e-06	0.000632487	0.460199	0.00996811		-0.398579	0.39855	2.38023	0.420127	0.461774		1.08235e-05	0.000642395	0.462096	0.0398369
						0.293075	0.325636	2.36762	0.422364	0.406046		5.27072e-06	0.000567913	0.40633	0.0219436		-0.032421	0.0342273	2.40235	0.41626	0.460515		2.66526e-06	0.000632173	0.460832	0.00996835		-0.399031	0.399006	2.38017	0.420137	0.462417		1.08271e-05	0.000642718	0.462738	0.0398299
						0.293532	0.325973	2.36759	0.42237	0.406614		5.2729e-06	0.000568144	0.406898	0.0219437		-0.0319642	0.0337903	2.40233	0.416263	0.461148		2.66396e-06	0.000631849	0.461464	0.00996859		-0.399483	0.399463	2.38011	0.420148	0.46306		1.08302e-05	0.000643004	0.463381	0.0398237
						0.293989	0.326311	2.36757	0.422375	0.407182		5.27131e-06	0.000568381	0.407466	0.021928		-0.0315074	0.0333538	2.40231	0.416265	0.461779		2.66261e-06	0.000631512	0.462095	0.00996885		-0.399936	0.39992	2.38005	0.420159	0.463703		1.0833e-05	0.000643261	0.464024	0.0398182
						0.294446	0.326649	2.36754	0.42238	0.407751		5.19748e-06	0.000568625	0.408035	0.0216116		-0.0310505	0.0329178	2.4023	0.416268	0.462411		2.66121e-06	0.000631163	0.462727	0.00996911		-0.400388	0.400377	2.37999	0.42017	0.464346		1.08356e-05	0.000643494	0.464668	0.0398131
						0.294903	0.326988	2.36751	0.422385	0.408319		5.20003e-06	0.000568909	0.408604	0.0216114		-0.0305937	0.0324823	2.40228	0.416271	0.463042		2.65363e-06	0.000630801	0.463358	0.00994643		-0.400842	0.400834	2.37993	0.420181	0.464989		1.08379e-05	0.00064371	0.465311	0.0398084
						0.29536	0.327327	2.36748	0.422391	0.408888		5.16495e-06	0.0005692	0.409173	0.0214546		-0.0301369	0.0320473	2.40227	0.416273	0.463673		2.45678e-06	0.000630422	0.463988	0.00921414		-0.401295	0.401291	2.37987	0.420192	0.465633		1.08402e-05	0.000643921	0.465955	0.0398039
						0.295816	0.327667	2.36745	0.422396	0.409457		5.12352e-06	0.000569497	0.409742	0.0212714		-0.02968	0.0316128	2.40225	0.416276	0.464303		2.45481e-06	0.000629932	0.464618	0.0092139		-0.401749	0.401747	2.37981	0.420202	0.466277		6.23446e-06	0.000644184	0.466599	0.0228827
						0.296273	0.328007	2.36742	0.422401	0.410027		5.02998e-06	0.000569802	0.410312	0.0208719		-0.0292232	0.0311791	2.40224	0.416278	0.464933		2.45277e-06	0.000629425	0.465248	0.00921365		-0.402203	0.402204	2.37977	0.420209	0.466921		0	0.000273791	0.467058	0
						0.29673	0.328347	2.36739	0.422406	0.410597		4.95091e-06	0.000570056	0.410882	0.0205346		-0.0287664	0.0307461	2.40223	0.416281	0.465563		2.45065e-06	0.000628899	0.465877	0.00921338		-0.40201	0.40201	2.37977	0.420209	0.467195
						0.297187	0.328688	2.36736	0.422411	0.411167		4.95277e-06	0.000570268	0.411452	0.0205347		-0.0283096	0.0303139	2.40221	0.416283	0.466192		2.32783e-06	0.000628354	0.466506	0.00875921
						0.297644	0.329029	2.36734	0.422416	0.411737		4.95467e-06	0.000570485	0.412022	0.0205348		-0.0278527	0.0298825	2.4022	0.416285	0.46682		2.25277e-06	0.000627848	0.467134	0.00848363
						0.2981	0.329371	2.36731	0.422421	0.412307		4.94253e-06	0.000570708	0.412593	0.0204764		-0.0273959	0.0294518	2.40219	0.416288	0.467448		2.2511e-06	0.000627356	0.467762	0.008484
						0.298557	0.329713	2.36728	0.422426	0.412878		4.87187e-06	0.000570935	0.413164	0.0201757		-0.0269391	0.0290218	2.40217	0.41629	0.468075		2.24937e-06	0.000626845	0.468389	0.00848438
						0.299014	0.330056	2.36725	0.422431	0.413449		4.87387e-06	0.000571169	0.413735	0.0201757		-0.0264822	0.0285925	2.40216	0.416292	0.468702		2.24756e-06	0.000626312	0.469015	0.00848477
						0.299471	0.330399	2.36723	0.422435	0.41402		4.87591e-06	0.000571408	0.414306	0.0201757		-0.0260254	0.0281641	2.40215	0.416294	0.469328		2.24567e-06	0.000625756	0.469641	0.00848517
						0.299928	0.330742	2.3672	0.42244	0.414592		4.87801e-06	0.000571653	0.414878	0.0201758		-0.0255686	0.0277364	2.40213	0.416297	0.469954		2.23748e-06	0.000625176	0.470267	0.00846205
						0.300385	0.331085	2.36717	0.422445	0.415163		4.88015e-06	0.000571903	0.415449	0.0201758		-0.0251117	0.0273097	2.40212	0.416299	0.470579		2.03686e-06	0.000624568	0.470892	0.00771081
						0.300841	0.331429	2.36714	0.42245	0.415735		4.85747e-06	0.00057216	0.416021	0.020073		-0.0246549	0.0268838	2.40211	0.416301	0.471204		2.03438e-06	0.000623842	0.471516	0.0077104
						0.301298	0.331774	2.36712	0.422455	0.416307		4.6464e-06	0.000572436	0.416594	0.0191915		-0.0241981	0.0264589	2.4021	0.416303	0.471828		2.0318e-06	0.000623085	0.472139	0.00770996
						0.301755	0.332119	2.36709	0.42246	0.41688		4.56344e-06	0.000572687	0.417166	0.0188406		-0.0237413	0.0260352	2.40209	0.416305	0.472451		2.0291e-06	0.000622295	0.472762	0.00770949
						0.302212	0.332464	2.36707	0.422464	0.417453		4.5651e-06	0.000572894	0.417739	0.0188406		-0.0232844	0.0256126	2.40207	0.416307	0.473073		2.02627e-06	0.000621471	0.473384	0.00770897
						0.302669	0.33281	2.36704	0.422469	0.418025		4.56679e-06	0.000573107	0.418312	0.0188406		-0.0228276	0.0251913	2.40206	0.416309	0.473695		1.86195e-06	0.00062061	0.474005	0.00709362
						0.303126	0.333156	2.36701	0.422473	0.418599		4.56854e-06	0.000573325	0.418885	0.0188406		-0.0223708	0.0247712	2.40205	0.416311	0.474315		1.82977e-06	0.000619784	0.474625	0.00698032
						0.303582	0.333502	2.36699	0.422478	0.419172		4.57032e-06	0.000573549	0.419459	0.0188406		-0.0219139	0.0243524	2.40204	0.416313	0.474935		1.82741e-06	0.000618932	0.475244	0.00698093
						0.304039	0.333849	2.36696	0.422482	0.419745		4.51642e-06	0.000573779	0.420032	0.018611		-0.0214571	0.0239348	2.40203	0.416314	0.475554		1.82494e-06	0.00061804	0.475863	0.00698155
						0.304496	0.334196	2.36694	0.422487	0.420319		4.48466e-06	0.000574015	0.420606	0.0184725		-0.0210003	0.0235185	2.40202	0.416316	0.476172		1.82234e-06	0.000617103	0.47648	0.00698218
						0.304953	0.334544	2.36691	0.422491	0.420893		4.48654e-06	0.000574258	0.42118	0.0184724		-0.0205435	0.0231036	2.40201	0.416318	0.476789		1.8133e-06	0.00061612	0.477097	0.00695863
						0.30541	0.334892	2.36689	0.422496	0.421467		4.48847e-06	0.000574506	0.421755	0.0184724		-0.0200866	0.0226902	2.402	0.41632	0.477405		1.60922e-06	0.000615084	0.477713	0.00618587
						0.305867	0.33524	2.36686	0.4225	0.422042		4.49045e-06	0.000574761	0.422329	0.0184723		-0.0196298	0.0222783	2.40199	0.416322	0.47802		1.60594e-06	0.00061391	0.478327	0.00618507
						0.306323	0.335589	2.36684	0.422505	0.422617		4.41236e-06	0.000575023	0.422904	0.0181429		-0.019173	0.0218682	2.40198	0.416323	0.478634		1.60249e-06	0.000612677	0.47894	0.0061842
						0.30678	0.335938	2.36681	0.422509	0.423192		4.31088e-06	0.000575231	0.423479	0.0177191		-0.0187161	0.02146	2.40197	0.416325	0.479247		1.59885e-06	0.000611381	0.479553	0.00618324
						0.307237	0.336288	2.36679	0.422514	0.423767		4.2551e-06	0.000575392	0.424055	0.017485		-0.0182593	0.0210536	2.40196	0.416326	0.479858		1.59502e-06	0.000610018	0.480163	0.00618218
						0.307694	0.336638	2.36676	0.422518	0.424342		4.19871e-06	0.000575559	0.42463	0.0172483		-0.0178025	0.0206494	2.40195	0.416328	0.480468		1.59097e-06	0.000608585	0.480773	0.00618102
						0.308151	0.336988	2.36674	0.422522	0.424918		4.19157e-06	0.000575767	0.425206	0.0172127		-0.0173456	0.0202473	2.40194	0.41633	0.481077		1.47035e-06	0.000607075	0.48138	0.00572662
						0.308608	0.337338	2.36672	0.422526	0.425494		4.19317e-06	0.000575987	0.425782	0.0172127		-0.0168888	0.0198475	2.40193	0.416331	0.481684		1.39956e-06	0.000605533	0.481987	0.00546478
						0.309064	0.337689	2.36669	0.42253	0.42607		4.19481e-06	0.000576214	0.426358	0.0172126		-0.016432	0.01945	2.40193	0.416332	0.482289		1.39612e-06	0.000603935	0.482591	0.00546579
						0.309521	0.33804	2.36667	0.422535	0.426646		4.18209e-06	0.000576447	0.426934	0.0171535		-0.0159752	0.019055	2.40192	0.416334	0.482893		1.39248e-06	0.000602246	0.483194	0.00546681
						0.309978	0.338392	2.36665	0.422539	0.427222		4.10775e-06	0.000576687	0.427511	0.0168416		-0.0155183	0.0186625	2.40191	0.416335	0.483496		1.38224e-06	0.000600461	0.483796	0.00544276
						0.310435	0.338744	2.36662	0.422543	0.427799		4.10948e-06	0.000576933	0.428087	0.0168415		-0.0150615	0.0182729	2.4019	0.416337	0.484096		1.17485e-06	0.00059857	0.484395	0.00464074
						0.310892	0.339096	2.3666	0.422547	0.428376		4.11126e-06	0.000577187	0.428665	0.0168414		-0.0146047	0.0178861	2.4019	0.416338	0.484695		1.17031e-06	0.000596493	0.484993	0.00463891
						0.311349	0.339449	2.36658	0.422551	0.428953		4.03957e-06	0.000577447	0.429242	0.0165403		-0.0141478	0.0175025	2.40189	0.416339	0.485291		1.16549e-06	0.000594296	0.485588	0.00463687
						0.311805	0.339802	2.36656	0.422555	0.429531		3.97888e-06	0.000577652	0.429819	0.016286		-0.013691	0.0171224	2.40188	0.41634	0.485885		1.16036e-06	0.000591971	0.486181	0.00463457
						0.312262	0.340156	2.36653	0.422559	0.430108		3.97999e-06	0.00057781	0.430397	0.0162861		-0.0132342	0.0167459	2.40188	0.416341	0.486477		1.15489e-06	0.00058951	0.486772	0.004632
						0.312719	0.340509	2.36651	0.422563	0.430686		3.89273e-06	0.000577973	0.430975	0.0159245		-0.0127773	0.0163733	2.40187	0.416342	0.487067		1.14906e-06	0.000586905	0.48736	0.00462909
						0.313176	0.340864	2.36649	0.422567	0.431264		3.88955e-06	0.000578141	0.431553	0.0159069		-0.0123205	0.0160049	2.40186	0.416344	0.487654		1.14285e-06	0.000584145	0.487946	0.00462581
						0.313633	0.341218	2.36647	0.422571	0.431842		3.89073e-06	0.000578314	0.432131	0.015907		-0.0118637	0.0156408	2.40186	0.416345	0.488238		1.13621e-06	0.000581221	0.488529	0.00462209
						0.31409	0.341573	2.36645	0.422575	0.43242		3.85433e-06	0.000578493	0.43271	0.0157533		-0.0114069	0.0152815	2.40185	0.416346	0.488819		1.0605e-06	0.000578123	0.489108	0.0043372
						0.314546	0.341927	2.36642	0.422579	0.432999		3.83234e-06	0.000578705	0.433288	0.0156576		-0.01095	0.0149272	2.40184	0.416347	0.489397		9.60007e-07	0.000574865	0.489685	0.00394846
						0.315003	0.342283	2.3664	0.422582	0.433578		3.83389e-06	0.000578942	0.433867	0.0156575		-0.0104932	0.0145782	2.40184	0.416348	0.489972		9.48236e-07	0.000571446	0.490258	0.00392338
						0.31546	0.342638	2.36638	0.422586	0.434157		3.76671e-06	0.000579187	0.434446	0.0153767		-0.0100364	0.0142349	2.40183	0.416349	0.490544		7.37661e-07	0.000567821	0.490828	0.0030716
						0.315917	0.342994	2.36636	0.42259	0.434736		3.74687e-06	0.000579438	0.435026	0.0152891		-0.00957954	0.0138977	2.40183	0.41635	0.491111		7.31413e-07	0.000563921	0.491393	0.00306665
						0.316374	0.343351	2.36634	0.422594	0.435315		3.68119e-06	0.000579698	0.435605	0.0150143		-0.00912271	0.0135671	2.40182	0.41635	0.491675		7.24716e-07	0.000559796	0.491955	0.00306095
						0.316831	0.343708	2.36632	0.422597	0.435895		3.62558e-06	0.0005799	0.436185	0.0147824		-0.00866588	0.0132435	2.40182	0.416351	0.492235		7.17535e-07	0.000555441	0.492513	0.00305439
						0.317287	0.344065	2.3663	0.422601	0.436475		3.62655e-06	0.000580054	0.436765	0.0147824		-0.00820905	0.0129276	2.40182	0.416352	0.492791		7.09833e-07	0.000550848	0.493066	0.0030468
						0.317744	0.344422	2.36628	0.422605	0.437055		3.62756e-06	0.000580213	0.437345	0.0147824		-0.00775222	0.0126198	2.40181	0.416352	0.493341		7.01655e-07	0.000546013	0.493614	0.00303836
						0.318201	0.34478	2.36626	0.422608	0.437635		3.57464e-06	0.000580378	0.437925	0.0145626		-0.00729539	0.0123207	2.40181	0.416353	0.493887		7.65534e-07	0.000540937	0.494158	0.00334608
						0.318658	0.345138	2.36624	0.422612	0.438215		3.53789e-06	0.000580548	0.438506	0.0144087		-0.00683856	0.012031	2.4018	0.416354	0.494428		7.60413e-07	0.000535624	0.494696	0.00335667
						0.319115	0.345496	2.36622	0.422615	0.438796		3.53898e-06	0.000580725	0.439086	0.0144088		-0.00638173	0.0117514	2.4018	0.416355	0.494964		7.54925e-07	0.000530082	0.495229	0.00336729
						0.319571	0.345855	2.3662	0.422619	0.439377		3.54009e-06	0.000580907	0.439667	0.0144088		-0.0059249	0.0114825	2.40179	0.416355	0.495494		7.49049e-07	0.000524328	0.495756	0.00337774
						0.320028	0.346214	2.36618	0.422623	0.439958		3.54125e-06	0.000581096	0.440248	0.0144088		-0.00546807	0.0112252	2.40179	0.416356	0.496018		7.36339e-07	0.000518386	0.496278	0.00335849
						0.320485	0.346573	2.36616	0.422626	0.440539		3.51149e-06	0.000581291	0.440829	0.0142829		-0.00501125	0.0109801	2.40179	0.416357	0.496537		5.24648e-07	0.000512289	0.496793	0.00242143
						0.320942	0.346932	2.36614	0.42263	0.44112		3.44982e-06	0.000581519	0.441411	0.0140266		-0.00455442	0.0107483	2.40178	0.416357	0.497049		5.17446e-07	0.000506051	0.497302	0.00241763
						0.321399	0.347292	2.36612	0.422633	0.441702		3.33896e-06	0.000581777	0.441992	0.0135698		-0.00409759	0.0105306	2.40178	0.416358	0.497555		5.09785e-07	0.000499769	0.497805	0.00241178
						0.321856	0.347652	2.3661	0.422636	0.442283		3.2881e-06	0.000581977	0.442574	0.0133585		-0.00364076	0.0103279	2.40178	0.416358	0.498055		5.01657e-07	0.000493517	0.498302	0.00240339
						0.322312	0.348013	2.36608	0.42264	0.442865		3.28895e-06	0.000582127	0.443156	0.0133585		-0.00318393	0.0101412	2.40177	0.416359	0.498548		4.56195e-07	0.000487385	0.498792	0.00221308
						0.322769	0.348374	2.36606	0.422643	0.443447		3.28983e-06	0.000582282	0.443739	0.0133586		-0.0027271	0.00997136	2.40177	0.416359	0.499036		4.12941e-07	0.000481481	0.499277	0.00202781
						0.323226	0.348735	2.36604	0.422646	0.44403		3.29075e-06	0.000582444	0.444321	0.0133586		-0.00227027	0.00981927	2.40177	0.41636	0.499517		4.12151e-07	0.000475923	0.499755	0.00204757
						0.323683	0.349096	2.36603	0.42265	0.444612		3.26644e-06	0.000582611	0.444903	0.0132561		-0.00181344	0.00968581	2.40177	0.41636	0.499993		4.11324e-07	0.000470832	0.500229	0.00206556
						0.32414	0.349458	2.36601	0.422653	0.445195		3.20299e-06	0.000582786	0.445486	0.0129947		-0.00135661	0.00957184	2.40176	0.416361	0.500464		4.10465e-07	0.000466342	0.500697	0.00208109
						0.324597	0.349819	2.36599	0.422656	0.445778		3.20399e-06	0.000582966	0.446069	0.0129947		-0.000899779	0.00947813	2.40176	0.416361	0.50093		4.09576e-07	0.000462586	0.501162	0.00209344
						0.325053	0.350182	2.36597	0.422659	0.446361		3.20501e-06	0.000583154	0.446652	0.0129947		-0.000442949	0.00940539	2.40176	0.416361	0.501393		4.02202e-07	0.00045969	0.501623	0.00206871
						0.32551	0.350544	2.36595	0.422662	0.446944		3.20608e-06	0.000583348	0.447235	0.0129947		1.38804e-05	0.00935418	2.40176	0.416362	0.501853		1.95135e-07	0.000457761	0.502082	0.0010079
						0.325967	0.350907	2.36594	0.422666	0.447527		3.20718e-06	0.000583549	0.447819	0.0129947		0.00047071	0.009325	2.40176	0.416362	0.50231		2.79948e-07	0.00045688	0.502539	0.00144875
						0.326424	0.35127	2.36592	0.422669	0.448111		3.13992e-06	0.000583757	0.448402	0.0127176		0.00092754	0.0093182	2.40175	0.416362	0.502767		4.00561e-07	0.000457102	0.502996	0.00207193
						0.326881	0.351633	2.3659	0.422672	0.448694		2.98508e-06	0.000583904	0.448986	0.0120874		0.00138437	0.00933397	2.40175	0.416363	0.503224		4.09502e-07	0.000458435	0.503454	0.00211202
						0.327338	0.351997	2.36588	0.422675	0.449278		2.96856e-06	0.000584032	0.44957	0.0120179		0.0018412	0.0093723	2.40175	0.416363	0.503683		4.1838e-07	0.000460849	0.503913	0.0021465
						0.327794	0.352361	2.36587	0.422678	0.449862		2.96933e-06	0.000584183	0.450154	0.0120179		0.00229803	0.00943303	2.40175	0.416364	0.504144		4.2713e-07	0.000464275	0.504376	0.00217522
						0.328251	0.352725	2.36585	0.422681	0.450446		2.97013e-06	0.000584341	0.450739	0.0120179		0.00275486	0.00951584	2.40174	0.416364	0.504608		4.35692e-07	0.000468611	0.504842	0.0021983
						0.328708	0.353089	2.36583	0.422684	0.451031		2.97097e-06	0.000584505	0.451323	0.0120179		0.00321169	0.00962025	2.40174	0.416364	0.505077		4.44013e-07	0.000473732	0.505313	0.00221606
						0.329165	0.353454	2.36582	0.422687	0.451615		2.96936e-06	0.000584677	0.451908	0.0120079		0.00366852	0.00974567	2.40174	0.416365	0.50555		4.52045e-07	0.000479496	0.50579	0.00222903
						0.329622	0.353819	2.3658	0.42269	0.4522		2.88611e-06	0.000584855	0.452492	0.0116677		0.00412535	0.00989135	2.40174	0.416365	0.50603		4.56834e-07	0.000485758	0.506273	0.00222361
						0.330079	0.354184	2.36578	0.422693	0.452785		2.88702e-06	0.000585041	0.453077	0.0116676		0.00458218	0.0100565	2.40173	0.416366	0.506516		4.64012e-07	0.000492372	0.506762	0.00222821
						0.330535	0.35455	2.36577	0.422696	0.45337		2.88797e-06	0.000585235	0.453663	0.0116676		0.00503901	0.0102402	2.40173	0.416366	0.507008		4.55665e-07	0.000499189	0.507258	0.00215824
						0.330992	0.354915	2.36575	0.422698	0.453955		2.88895e-06	0.000585436	0.454248	0.0116676		0.00549584	0.0104414	2.40173	0.416367	0.507507		4.61774e-07	0.000506135	0.50776	0.00215716
						0.331449	0.355281	2.36574	0.422701	0.454541		2.83993e-06	0.000585644	0.454833	0.0114655		0.00595267	0.0106593	2.40173	0.416367	0.508013		4.67519e-07	0.000513076	0.50827	0.00215445
						0.331906	0.355648	2.36572	0.422704	0.455126		2.79835e-06	0.00058579	0.455419	0.0112948		0.00640949	0.0108929	2.40172	0.416368	0.508526		4.72901e-07	0.000519923	0.508786	0.00215056
						0.332363	0.356015	2.3657	0.422707	0.455712		2.71915e-06	0.000585881	0.456005	0.0109734		0.00686632	0.0111411	2.40172	0.416368	0.509046		4.77929e-07	0.000526608	0.50931	0.00214583
						0.33282	0.356381	2.36569	0.42271	0.456298		2.71279e-06	0.000585977	0.456591	0.010946		0.00732315	0.0114031	2.40172	0.416369	0.509573		4.82612e-07	0.000533077	0.509839	0.00214056
						0.333276	0.356748	2.36567	0.422712	0.456884		2.67223e-06	0.000586079	0.457177	0.0107805		0.00777998	0.0116778	2.40172	0.416369	0.510106		5.31334e-07	0.000539292	0.510376	0.0023295
						0.333733	0.357116	2.36566	0.422715	0.45747		2.66854e-06	0.000586234	0.457763	0.0107627		0.00823681	0.0119644	2.40171	0.41637	0.510645		8.23381e-07	0.000545226	0.510918	0.00357062
						0.33419	0.357483	2.36564	0.422718	0.458056		2.6693e-06	0.000586402	0.458349	0.0107627		0.00869364	0.012262	2.40171	0.41637	0.51119		8.31619e-07	0.000550864	0.511466	0.00356944
						0.334647	0.357851	2.36563	0.42272	0.458643		2.67009e-06	0.000586578	0.458936	0.0107627		0.00915047	0.0125698	2.4017	0.416371	0.511741		8.39244e-07	0.000556197	0.512019	0.00356762
						0.335104	0.358219	2.36561	0.422723	0.459229		2.60273e-06	0.000586762	0.459523	0.0104878		0.0096073	0.0128871	2.4017	0.416372	0.512298		8.39783e-07	0.000561227	0.512578	0.00353792
						0.335561	0.358587	2.3656	0.422726	0.459816		2.58901e-06	0.000586953	0.460109	0.0104292		0.0100641	0.0132131	2.40169	0.416373	0.512859		6.38432e-07	0.000565959	0.513142	0.00266716
						0.336017	0.358955	2.36559	0.422728	0.460403		2.58988e-06	0.000587154	0.460696	0.0104291		0.010521	0.0135472	2.40169	0.416374	0.513425		6.44553e-07	0.000570467	0.51371	0.00267145
						0.336474	0.359324	2.36557	0.422731	0.46099		2.54532e-06	0.000587363	0.461284	0.010246		0.0109778	0.0138889	2.40169	0.416374	0.513995		8.91854e-07	0.000574695	0.514283	0.00366923
						0.336931	0.359693	2.36556	0.422733	0.461577		2.50752e-06	0.000587507	0.461871	0.0100914		0.0114346	0.0142376	2.40168	0.416375	0.51457		1.01444e-06	0.000578655	0.514859	0.00414501
						0.337388	0.360063	2.36554	0.422736	0.462165		2.5079e-06	0.000587594	0.462459	0.0100914		0.0118915	0.0145928	2.40167	0.416376	0.515149		1.02194e-06	0.00058236	0.51544	0.0041491
						0.337845	0.360432	2.36553	0.422738	0.462752		2.44752e-06	0.000587687	0.463046	0.00984691		0.0123483	0.0149539	2.40167	0.416377	0.515731		9.12781e-07	0.000585823	0.516024	0.003684
						0.338301	0.360802	2.36552	0.422741	0.46334		2.42651e-06	0.000587787	0.463634	0.00976071		0.0128051	0.0153207	2.40166	0.416378	0.516317		8.59234e-07	0.000589014	0.516611	0.0034491
						0.338758	0.361172	2.3655	0.422743	0.463928		2.42695e-06	0.000587892	0.464222	0.00976073		0.0132619	0.0156925	2.40166	0.416379	0.516906		8.62853e-07	0.000591969	0.517202	0.00344633
						0.339215	0.361542	2.36549	0.422746	0.464516		2.41587e-06	0.000588004	0.46481	0.00971431		0.0137188	0.016069	2.40165	0.41638	0.517498		1.07674e-06	0.000594726	0.517795	0.00428069
						0.339672	0.361912	2.36547	0.422748	0.465104		2.38648e-06	0.000588137	0.465398	0.00959396		0.0141756	0.0164497	2.40165	0.416381	0.518092		1.24268e-06	0.000597301	0.518391	0.00491908
						0.340129	0.362283	2.36546	0.422751	0.465692		2.3872e-06	0.000588318	0.465986	0.00959391		0.0146324	0.0168346	2.40164	0.416382	0.51869		1.24064e-06	0.000599704	0.51899	0.00489136
						0.340586	0.362653	2.36545	0.422753	0.46628		2.33609e-06	0.000588507	0.466575	0.00938549		0.0150893	0.0172231	2.40163	0.416383	0.519289		1.0352e-06	0.000601951	0.51959	0.00406614
						0.341042	0.363024	2.36543	0.422755	0.466869		2.31054e-06	0.000588706	0.467163	0.0092797		0.0155461	0.0176151	2.40163	0.416384	0.519891		1.03928e-06	0.000604137	0.520193	0.00406741
						0.341499	0.363396	2.36542	0.422758	0.467458		2.27007e-06	0.000588914	0.467752	0.00911397		0.0160029	0.0180104	2.40162	0.416385	0.520496		1.04309e-06	0.000606184	0.520799	0.00406852
						0.341956	0.363767	2.36541	0.42276	0.468046		2.23575e-06	0.000589055	0.468341	0.008974		0.0164597	0.0184089	2.40162	0.416386	0.521102		1.29221e-06	0.000608101	0.521406	0.00502432
						0.342413	0.364139	2.3654	0.422762	0.468635		2.23606e-06	0.000589138	0.46893	0.00897401		0.0169166	0.0188102	2.40161	0.416388	0.52171		1.43371e-06	0.000609898	0.522015	0.00555806
						0.34287	0.364511	2.36538	0.422764	0.469225		2.23641e-06	0.000589227	0.469519	0.00897403		0.0173734	0.0192143	2.4016	0.416389	0.52232		1.43794e-06	0.000611583	0.522625	0.00555909
						0.343327	0.364883	2.36537	0.422767	0.469814		2.19045e-06	0.000589324	0.470109	0.00878817		0.0178302	0.0196209	2.40159	0.416391	0.522931		1.44189e-06	0.000613165	0.523238	0.00556
						0.343783	0.365256	2.36536	0.422769	0.470403		2.15977e-06	0.000589427	0.470698	0.00866356		0.0182871	0.0200299	2.40158	0.416392	0.523544		1.28244e-06	0.000614651	0.523852	0.0049332
						0.34424	0.365628	2.36535	0.422771	0.470993		2.16017e-06	0.000589537	0.471287	0.00866357		0.0187439	0.0204411	2.40158	0.416393	0.524159		1.25098e-06	0.000615973	0.524467	0.00480183
						0.344697	0.366001	2.36534	0.422773	0.471582		2.16061e-06	0.000589654	0.471877	0.00866358		0.0192007	0.0208543	2.40157	0.416395	0.524775		1.57824e-06	0.000617199	0.525084	0.00604599
						0.345154	0.366374	2.36532	0.422775	0.472172		2.16107e-06	0.000589779	0.472467	0.00866359		0.0196576	0.0212694	2.40156	0.416396	0.525392		1.63975e-06	0.000618351	0.525701	0.00626994
						0.345611	0.366747	2.36531	0.422777	0.472762		2.13254e-06	0.000589911	0.473057	0.0085473		0.0201144	0.0216861	2.40155	0.416398	0.526011		1.43022e-06	0.000619437	0.52632	0.00545917
						0.346068	0.36712	2.3653	0.42278	0.473351		2.08469e-06	0.000590094	0.473647	0.00835293		0.0205712	0.0221044	2.40154	0.416399	0.52663		1.43292e-06	0.000620553	0.52694	0.00545963
						0.346524	0.367493	2.36529	0.422782	0.473942		2.01447e-06	0.000590299	0.474237	0.00806879		0.021028	0.0225244	2.40153	0.416401	0.527251		1.43546e-06	0.000621606	0.527561	0.00546004
						0.346981	0.367867	2.36528	0.422784	0.474532		1.9833e-06	0.000590435	0.474827	0.00794211		0.0214849	0.022946	2.40152	0.416402	0.527872		1.47595e-06	0.000622601	0.528184	0.00560508
						0.347438	0.368241	2.36526	0.422786	0.475122		1.98356e-06	0.000590512	0.475418	0.00794212		0.0219417	0.023369	2.40152	0.416404	0.528495		1.83718e-06	0.00062354	0.528807	0.00696635
						0.347895	0.368615	2.36525	0.422788	0.475713		1.98384e-06	0.000590596	0.476008	0.00794212		0.0223985	0.0237934	2.40151	0.416405	0.529118		1.8399e-06	0.000624429	0.529431	0.00696674
						0.348352	0.36899	2.36524	0.42279	0.476303		1.98415e-06	0.000590687	0.476599	0.00794213		0.0228554	0.0242191	2.4015	0.416407	0.529743		1.84246e-06	0.00062527	0.530055	0.00696708
						0.348809	0.369364	2.36523	0.422792	0.476894		1.94882e-06	0.000590786	0.477189	0.00779941		0.0233122	0.024646	2.40148	0.416409	0.530368		1.84489e-06	0.000626066	0.530681	0.0069674
						0.349265	0.369739	2.36522	0.422794	0.477485		1.91273e-06	0.000590893	0.47778	0.00765356		0.023769	0.0250741	2.40147	0.416411	0.530994		1.66358e-06	0.00062682	0.531308	0.0062751
						0.349722	0.370114	2.36521	0.422795	0.478076		1.9131e-06	0.000591008	0.478371	0.00765356		0.0242258	0.0255033	2.40146	0.416413	0.531621		1.80535e-06	0.00062745	0.531935	0.00680303
						0.350179	0.370489	2.3652	0.422797	0.478667		1.9135e-06	0.000591131	0.478962	0.00765356		0.0246827	0.0259334	2.40145	0.416414	0.532248		2.03701e-06	0.000628034	0.532562	0.00766882
						0.350636	0.370864	2.36519	0.422799	0.479258		1.91393e-06	0.000591264	0.479554	0.00765356		0.0251395	0.0263644	2.40144	0.416416	0.532876		1.82332e-06	0.00062859	0.533191	0.00685826
						0.351093	0.371239	2.36518	0.422801	0.479849		1.91438e-06	0.000591405	0.480145	0.00765356		0.0255963	0.0267961	2.40143	0.416418	0.533505		1.82518e-06	0.000629215	0.53382	0.00685846
						0.35155	0.371615	2.36517	0.422803	0.480441		1.83807e-06	0.000591555	0.480736	0.00734658		0.0260532	0.0272288	2.40142	0.41642	0.534134		1.82696e-06	0.00062981	0.534449	0.00685864
						0.352006	0.37199	2.36516	0.422805	0.481032		1.75022e-06	0.00059165	0.481328	0.00699433		0.02651	0.0276624	2.40141	0.416422	0.534764		1.82864e-06	0.000630376	0.535079	0.00685881
						0.352463	0.372366	2.36515	0.422807	0.481624		1.75041e-06	0.000591716	0.48192	0.00699433		0.0269668	0.0280968	2.4014	0.416424	0.535394		2.14032e-06	0.000630915	0.53571	0.00802096
						0.35292	0.372743	2.36514	0.422808	0.482216		1.75063e-06	0.00059179	0.482511	0.00699433		0.0274237	0.0285319	2.40139	0.416426	0.536025		2.23933e-06	0.000631428	0.536341	0.0083852
						0.353377	0.373119	2.36513	0.42281	0.482807		1.75088e-06	0.000591873	0.483103	0.00699433		0.0278805	0.0289678	2.40137	0.416428	0.536657		2.24111e-06	0.000631918	0.536973	0.00838536
						0.353834	0.373495	2.36512	0.422812	0.483399		1.75115e-06	0.000591965	0.483695	0.00699433		0.0283373	0.0294044	2.40136	0.41643	0.537289		2.2428e-06	0.000632384	0.537605	0.0083855
						0.354291	0.373872	2.36511	0.422814	0.483991		1.72335e-06	0.000592065	0.484287	0.00688212		0.0287941	0.0298417	2.40135	0.416433	0.537921		2.18063e-06	0.00063283	0.538237	0.00814732
						0.354747	0.374248	2.3651	0.422815	0.484583		1.68528e-06	0.000592176	0.484879	0.00672885		0.029251	0.0302796	2.40134	0.416435	0.538554		2.08603e-06	0.000633225	0.53887	0.007789
						0.355204	0.374625	2.36509	0.422817	0.485175		1.68562e-06	0.000592295	0.485472	0.00672884		0.0297078	0.0307181	2.40132	0.416437	0.539187		2.43468e-06	0.000633531	0.539504	0.00908644
						0.355661	0.375002	2.36508	0.422819	0.485768		1.68599e-06	0.000592425	0.486064	0.00672883		0.0301646	0.0311571	2.40131	0.416439	0.539821		2.2165e-06	0.000633825	0.540138	0.00826834
						0.356118	0.375379	2.36507	0.42282	0.48636		1.68638e-06	0.000592565	0.486656	0.00672882		0.0306215	0.0315964	2.4013	0.416442	0.540454		2.21786e-06	0.000634206	0.540772	0.00826844
						0.356575	0.375757	2.36506	0.422822	0.486953		1.65697e-06	0.000592716	0.487249	0.00660977		0.0310783	0.0320363	2.40128	0.416444	0.541089		2.21916e-06	0.000634571	0.541406	0.00826853
						0.357032	0.376134	2.36505	0.422824	0.487545		1.60609e-06	0.000592789	0.487842	0.00640603		0.0315351	0.0324768	2.40127	0.416446	0.541723		2.22041e-06	0.00063492	0.542041	0.00826861
						0.357488	0.376512	2.36504	0.422825	0.488138		1.56652e-06	0.000592796	0.488435	0.00624812		0.031992	0.0329177	2.40126	0.416448	0.542358		2.44471e-06	0.000635254	0.542676	0.0090991
						0.357945	0.37689	2.36503	0.422827	0.488731		1.53653e-06	0.00059281	0.489027	0.00612837		0.0324488	0.0333592	2.40124	0.416451	0.542993		2.63934e-06	0.000635575	0.543311	0.00981858
						0.358402	0.377268	2.36502	0.422829	0.489324		1.53671e-06	0.000592878	0.48962	0.00612837		0.0329056	0.033801	2.40123	0.416453	0.543629		2.64064e-06	0.000635882	0.543947	0.00981866
						0.358859	0.377645	2.36502	0.42283	0.489917		1.53691e-06	0.000592956	0.490213	0.00612837		0.0333624	0.0342434	2.40121	0.416456	0.544265		2.64188e-06	0.000636177	0.544583	0.00981873
						0.359316	0.378023	2.36501	0.422832	0.49051		1.53714e-06	0.000593044	0.490806	0.00612836		0.0338193	0.0346861	2.4012	0.416459	0.544901		2.64308e-06	0.000636459	0.545219	0.0098188
						0.359772	0.378402	2.365	0.422833	0.491103		1.51448e-06	0.000593144	0.491399	0.00603704		0.0342761	0.0351293	2.40118	0.416461	0.545538		2.4437e-06	0.000636731	0.545856	0.00907425
						0.360229	0.37878	2.36499	0.422835	0.491696		1.47708e-06	0.000593254	0.491992	0.00588683		0.0347329	0.0355728	2.40117	0.416464	0.546174		2.81309e-06	0.0006369	0.546493	0.0104432
						0.360686	0.379158	2.36498	0.422836	0.492289		1.47738e-06	0.000593377	0.492586	0.00588681		0.0351898	0.0360166	2.40115	0.416466	0.546811		2.61147e-06	0.000637054	0.54713	0.00969232
						0.361143	0.379537	2.36497	0.422838	0.492882		1.47771e-06	0.000593511	0.493179	0.0058868		0.0356466	0.0364606	2.40114	0.416469	0.547448		2.6125e-06	0.000637302	0.547767	0.00969237
						0.3616	0.379916	2.36497	0.422839	0.493476		1.45107e-06	0.000593658	0.493773	0.00577925		0.0361034	0.036905	2.40112	0.416472	0.548085		2.61349e-06	0.000637541	0.548404	0.00969242
						0.362057	0.380295	2.36496	0.422841	0.49407		1.42842e-06	0.000593725	0.494366	0.00568839		0.0365602	0.0373497	2.40111	0.416474	0.548723		2.61444e-06	0.00063777	0.549042	0.00969247
						0.362513	0.380674	2.36495	0.422842	0.494663		1.40681e-06	0.000593722	0.49496	0.00560236		0.0370171	0.0377947	2.40109	0.416477	0.549361		2.77434e-06	0.000637991	0.54968	0.0102817
						0.36297	0.381054	2.36494	0.422843	0.495257		1.36926e-06	0.000593727	0.495554	0.00545277		0.0374739	0.0382401	2.40108	0.41648	0.549999		3.04186e-06	0.000638204	0.550318	0.0112694
						0.363427	0.381433	2.36493	0.422845	0.495851		1.36929e-06	0.00059374	0.496148	0.00545278		0.0379307	0.0386857	2.40106	0.416483	0.550637		3.04285e-06	0.000638409	0.550956	0.0112694
						0.363884	0.381812	2.36493	0.422846	0.496445		1.3485e-06	0.000593761	0.496741	0.00536982		0.0383876	0.0391317	2.40104	0.416486	0.551275		3.04381e-06	0.000638607	0.551595	0.0112694
						0.364341	0.382191	2.36492	0.422847	0.497038		1.34142e-06	0.000593816	0.497335	0.00534112		0.0388444	0.0395779	2.40102	0.416489	0.551914		3.04473e-06	0.000638797	0.552233	0.0112695
						0.364798	0.382571	2.36491	0.422849	0.497632		1.34159e-06	0.000593893	0.497929	0.00534111		0.0393012	0.0400244	2.40101	0.416492	0.552553		2.90595e-06	0.000638981	0.552872	0.0107527
						0.365254	0.38295	2.3649	0.42285	0.498226		1.32242e-06	0.000593983	0.498523	0.00526399		0.0397581	0.0404712	2.40099	0.416495	0.553192		3.15582e-06	0.000639096	0.553511	0.0116752
						0.365711	0.38333	2.3649	0.422851	0.49882		1.28753e-06	0.000594087	0.499117	0.00512423		0.0402149	0.0409181	2.40097	0.416498	0.553831		3.00941e-06	0.000639169	0.55415	0.0111323
						0.366168	0.38371	2.36489	0.422853	0.499414		1.28779e-06	0.000594205	0.499711	0.00512421		0.0406717	0.0413652	2.40095	0.416501	0.55447		3.01022e-06	0.00063934	0.55479	0.0111323
						0.366625	0.38409	2.36488	0.422854	0.500008		1.26358e-06	0.000594338	0.500305	0.00502675		0.0411285	0.0418125	2.40094	0.416504	0.555109		3.011e-06	0.000639504	0.555429	0.0111324
						0.367082	0.38447	2.36488	0.422855	0.500603		1.24299e-06	0.000594388	0.5009	0.00494442		0.0415854	0.04226	2.40092	0.416507	0.555749		3.01176e-06	0.000639664	0.556069	0.0111324
						0.367539	0.38485	2.36487	0.422857	0.501197		1.24294e-06	0.000594366	0.501494	0.00494441		0.0420422	0.0427077	2.4009	0.41651	0.556389		3.12187e-06	0.000639817	0.556708	0.0115366
						0.367995	0.38523	2.36486	0.422858	0.501791		1.22424e-06	0.000594353	0.502089	0.00487013		0.042499	0.0431557	2.40088	0.416513	0.557028		3.44814e-06	0.000639966	0.557348	0.0127393
						0.368452	0.385611	2.36485	0.422859	0.502386		1.18974e-06	0.000594351	0.502683	0.0047329		0.0429559	0.0436039	2.40086	0.416517	0.557668		3.44892e-06	0.00064011	0.557988	0.0127394
						0.368909	0.385991	2.36485	0.42286	0.50298		1.18975e-06	0.000594358	0.503277	0.0047329		0.0434127	0.0440522	2.40085	0.41652	0.558308		3.44968e-06	0.000640249	0.558629	0.0127394
						0.369366	0.386371	2.36484	0.422861	0.503574		1.18979e-06	0.000594377	0.503872	0.00473291		0.0438695	0.0445008	2.40083	0.416523	0.558949		3.45041e-06	0.000640383	0.559269	0.0127394
						0.369823	0.386751	2.36483	0.422863	0.504169		1.17627e-06	0.000594406	0.504466	0.00467888		0.0443264	0.0449496	2.40081	0.416527	0.559589		3.35972e-06	0.000640514	0.559909	0.0124021
						0.37028	0.387132	2.36483	0.422864	0.504763		1.16369e-06	0.000594447	0.50506	0.00462852		0.0447832	0.0453986	2.40079	0.41653	0.56023		3.51455e-06	0.0006406	0.56055	0.0129718
						0.370736	0.387512	2.36482	0.422865	0.505358		1.14704e-06	0.000594504	0.505655	0.00456188		0.04524	0.0458476	2.40077	0.416534	0.56087		3.41118e-06	0.000640624	0.561191	0.0125899
						0.371193	0.387892	2.36481	0.422866	0.505952		1.11582e-06	0.000594579	0.506249	0.00443715		0.0456968	0.0462968	2.40075	0.416537	0.561511		3.41184e-06	0.000640747	0.561831	0.0125899
						0.37165	0.388273	2.36481	0.422867	0.506547		1.09364e-06	0.000594673	0.506844	0.00434827		0.0461537	0.0467461	2.40073	0.416541	0.562152		3.41248e-06	0.000640865	0.562472	0.0125899
						0.372107	0.388654	2.3648	0.422868	0.507141		1.07477e-06	0.000594681	0.507439	0.00427318		0.0466105	0.0471955	2.40071	0.416544	0.562792		3.41309e-06	0.00064098	0.563113	0.0125899
						0.372564	0.389034	2.3648	0.422869	0.507736		1.07465e-06	0.000594614	0.508033	0.00427317		0.0470673	0.0476451	2.40069	0.416547	0.563433		3.48318e-06	0.000641092	0.563754	0.0128462
						0.373021	0.389415	2.36479	0.42287	0.508331		1.07455e-06	0.000594559	0.508628	0.00427317		0.0475242	0.0480949	2.40067	0.416551	0.564075		3.85898e-06	0.0006412	0.564395	0.0142298
						0.373477	0.389795	2.36478	0.422871	0.508925		1.05813e-06	0.000594518	0.509223	0.00420816		0.047981	0.0485449	2.40064	0.416555	0.564716		3.85962e-06	0.000641305	0.565036	0.0142298
						0.373934	0.390176	2.36478	0.422873	0.50952		1.0274e-06	0.00059449	0.509817	0.00408617		0.0484378	0.0489949	2.40062	0.416559	0.565357		3.86023e-06	0.000641406	0.565678	0.0142298
						0.374391	0.390556	2.36477	0.422874	0.510114		1.02738e-06	0.000594476	0.510411	0.00408617		0.0488946	0.0494452	2.4006	0.416562	0.565998		3.86083e-06	0.000641505	0.566319	0.0142298
						0.374848	0.390937	2.36477	0.422875	0.510709		1.02738e-06	0.000594476	0.511006	0.00408617		0.0493515	0.0498955	2.40058	0.416566	0.56664		3.80979e-06	0.000641601	0.566961	0.0140396
						0.375305	0.391317	2.36476	0.422876	0.511303		1.02741e-06	0.000594491	0.5116	0.00408617		0.0498083	0.0503461	2.40056	0.41657	0.567282		3.88608e-06	0.000641673	0.567602	0.0143192
						0.375762	0.391698	2.36476	0.422877	0.511898		1.01953e-06	0.000594522	0.512195	0.00405463		0.0502651	0.0507967	2.40053	0.416574	0.567923		3.81737e-06	0.000641665	0.568244	0.0140662
						0.376218	0.392078	2.36475	0.422878	0.512492		9.8771e-07	0.000594528	0.512789	0.00392804		0.050722	0.0512473	2.40051	0.416578	0.568565		3.81792e-06	0.000641757	0.568886	0.0140662
						0.376675	0.392459	2.36474	0.422879	0.513087		9.39984e-07	0.000594468	0.513384	0.00373862		0.0511788	0.051698	2.40049	0.416582	0.569207		3.81845e-06	0.000641845	0.569528	0.0140662
						0.377132	0.392839	2.36474	0.42288	0.513681		9.22287e-07	0.000594322	0.513978	0.00366913		0.0516356	0.0521489	2.40047	0.416585	0.569848		3.81897e-06	0.000641931	0.570169	0.0140662
						0.377589	0.393219	2.36473	0.422881	0.514276		9.21941e-07	0.0005941	0.514573	0.00366913		0.0520925	0.0525998	2.40045	0.416589	0.57049		3.85583e-06	0.000642015	0.570811	0.0142001
						0.378046	0.393599	2.36473	0.422881	0.51487		9.21625e-07	0.000593898	0.515167	0.00366912		0.0525493	0.0530509	2.40042	0.416593	0.571132		4.27492e-06	0.000642096	0.571453	0.0157415
						0.378503	0.393978	2.36472	0.422882	0.515464		9.21341e-07	0.000593716	0.51576	0.00366911		0.0530061	0.0535021	2.4004	0.416597	0.571775		4.27545e-06	0.000642175	0.572096	0.0157415
						0.378959	0.394358	2.36472	0.422883	0.516057		9.07357e-07	0.000593554	0.516354	0.00361441		0.0534629	0.0539535	2.40037	0.416602	0.572417		4.27596e-06	0.000642252	0.572738	0.0157416
						0.379416	0.394737	2.36471	0.422884	0.516651		8.80392e-07	0.000593414	0.516948	0.00350782		0.0539198	0.0544049	2.40035	0.416606	0.573059		4.27646e-06	0.000642326	0.57338	0.0157416
						0.379873	0.395115	2.36471	0.422885	0.517244		8.80217e-07	0.000593296	0.517541	0.00350782		0.0543766	0.0548565	2.40032	0.41661	0.573701		4.25918e-06	0.000642399	0.574022	0.0156762
						0.38033	0.395494	2.3647	0.422886	0.517838		8.80075e-07	0.000593201	0.518134	0.00350782		0.0548334	0.0553081	2.4003	0.416615	0.574344		4.26841e-06	0.000642463	0.574665	0.0157086
						0.380787	0.395872	2.3647	0.422887	0.518431		8.79969e-07	0.00059313	0.518727	0.00350782		0.0552903	0.0557598	2.40028	0.416619	0.574986		4.22836e-06	0.000642435	0.575307	0.0155619
						0.381243	0.396251	2.36469	0.422888	0.519024		8.79898e-07	0.000593082	0.51932	0.00350782		0.0557471	0.0562115	2.40025	0.416623	0.575629		4.22882e-06	0.000642505	0.57595	0.0155619
						0.3817	0.396629	2.36469	0.422889	0.519617		8.47835e-07	0.00059306	0.519913	0.00338012		0.0562039	0.0566633	2.40023	0.416627	0.576271		4.22927e-06	0.000642573	0.576592	0.0155619
						0.382157	0.397007	2.36468	0.422889	0.52021		7.80873e-07	0.000591999	0.520506	0.00311873		0.0566608	0.0571152	2.4002	0.416631	0.576914		4.22971e-06	0.000642639	0.577235	0.0155619
						0.382614	0.397384	2.36468	0.42289	0.520802		7.59539e-07	0.000576086	0.52109	0.00311732		0.0571176	0.0575672	2.40018	0.416636	0.577556		4.23823e-06	0.000642704	0.577878	0.0155917
						0.383071	0.397735	2.36468	0.422891	0.521378		7.39461e-07	0.00056176	0.521659	0.00311232		0.0575744	0.0580193	2.40015	0.41664	0.578199		4.69623e-06	0.000642766	0.57852	0.0172749
						0.383528	0.398061	2.36467	0.422892	0.52194		7.20582e-07	0.000548909	0.522214	0.00310386		0.0580312	0.0584715	2.40013	0.416645	0.578842		4.69668e-06	0.000642828	0.579163	0.0172749
						0.383984	0.398366	2.36467	0.422892	0.522489		7.02845e-07	0.000537423	0.522757	0.00309216		0.0584881	0.0589237	2.4001	0.416649	0.579485		4.69712e-06	0.000642887	0.579806	0.0172749
						0.384441	0.398649	2.36466	0.422893	0.523026		6.86196e-07	0.000527193	0.52329	0.0030775		0.0589449	0.059376	2.40007	0.416654	0.580127		4.69754e-06	0.000642945	0.580449	0.0172749
						0.384898	0.398912	2.36466	0.422894	0.523553		6.476e-07	0.000518112	0.523812	0.0029553		0.0594017	0.0598285	2.40005	0.416659	0.58077		4.69796e-06	0.000643002	0.581092	0.0172749
						0.385355	0.399156	2.36466	0.422894	0.524071		6.29396e-07	0.000510078	0.524327	0.00291747		0.0598586	0.060281	2.40002	0.416663	0.581413		4.672e-06	0.000643057	0.581735	0.017178
						0.385812	0.399383	2.36465	0.422895	0.524582		6.16331e-07	0.000502992	0.524833	0.00289715		0.0603154	0.0607335	2.39999	0.416668	0.582056		4.64433e-06	0.000643021	0.582378	0.0170772
						0.386269	0.399594	2.36465	0.422896	0.525085		6.04106e-07	0.000496762	0.525333	0.0028753		0.0607722	0.0611861	2.39996	0.416673	0.582699		4.64473e-06	0.000643075	0.583021	0.0170772
						0.386725	0.399789	2.36465	0.422896	0.525581		5.75569e-07	0.0004913	0.525827	0.00276993		0.061229	0.0616387	2.39994	0.416677	0.583343		4.64511e-06	0.000643129	0.583664	0.0170772
						0.387182	0.39997	2.36464	0.422897	0.526073		5.50367e-07	0.000486496	0.526316	0.00267481		0.0616859	0.0620914	2.39991	0.416682	0.583986		4.64549e-06	0.000643181	0.584307	0.0170772
						0.387639	0.400137	2.36464	0.422897	0.526559		5.40293e-07	0.000482291	0.5268	0.00264874		0.0621427	0.0625441	2.39988	0.416687	0.584629		4.64586e-06	0.000643232	0.58495	0.0170772
						0.388096	0.400292	2.36464	0.422898	0.527041		5.29267e-07	0.000478643	0.527281	0.00261446		0.0625995	0.062997	2.39986	0.416691	0.585272		5.10642e-06	0.000643281	0.585594	0.0187687
						0.388553	0.400435	2.36463	0.422899	0.52752		4.99455e-07	0.000475485	0.527758	0.00248358		0.0630564	0.0634499	2.39983	0.416696	0.585915		5.12339e-06	0.00064333	0.586237	0.0188297
						0.38901	0.400566	2.36463	0.422899	0.527996		4.91728e-07	0.000472757	0.528232	0.00245927		0.0635132	0.0639028	2.3998	0.416702	0.586559		5.12377e-06	0.000643377	0.58688	0.0188297
						0.389466	0.400688	2.36463	0.4229	0.528468		4.84546e-07	0.000470406	0.528703	0.00243546		0.06397	0.0643559	2.39977	0.416707	0.587202		5.12414e-06	0.000643423	0.587524	0.0188297
						0.389923	0.4008	2.36463	0.4229	0.528939		4.77876e-07	0.000468384	0.529173	0.0024123		0.0644269	0.064809	2.39974	0.416712	0.587846		5.1245e-06	0.000643468	0.588167	0.0188297
						0.39038	0.400904	2.36462	0.4229	0.529407		4.71685e-07	0.000466648	0.52964	0.00238991		0.0648837	0.0652621	2.39971	0.416717	0.588489		5.09863e-06	0.000643512	0.588811	0.0187334
						0.390837	0.400999	2.36462	0.422901	0.529874		4.65942e-07	0.00046516	0.530106	0.00236836		0.0653405	0.0657153	2.39968	0.416722	0.589132		5.06529e-06	0.000643476	0.589454	0.0186119
						0.391294	0.401087	2.36462	0.422901	0.530339		4.60619e-07	0.000463888	0.530571	0.00234773		0.0657973	0.0661685	2.39965	0.416727	0.589776		5.06563e-06	0.00064352	0.590098	0.0186119
						0.391751	0.401167	2.36461	0.422902	0.530803		4.4081e-07	0.000462801	0.531034	0.00225204		0.0662542	0.0666218	2.39962	0.416732	0.590419		5.06597e-06	0.000643563	0.590741	0.0186119
						0.392207	0.401241	2.36461	0.422902	0.531266		4.23516e-07	0.000461871	0.531496	0.00216805		0.066711	0.0670751	2.39959	0.416737	0.591063		5.0663e-06	0.000643605	0.591385	0.0186119
						0.392664	0.401309	2.36461	0.422903	0.531727		3.99909e-07	0.000461077	0.531958	0.00205072		0.0671678	0.0675284	2.39956	0.416742	0.591707		5.06662e-06	0.000643645	0.592028	0.0186119
						0.393121	0.401372	2.36461	0.422903	0.532189		3.96177e-07	0.000460404	0.532419	0.00203456		0.0676247	0.0679818	2.39954	0.416747	0.59235		5.51657e-06	0.000643685	0.592672	0.0202635
						0.393578	0.401429	2.36461	0.422904	0.532649		3.92732e-07	0.000459833	0.532879	0.00201937		0.0680815	0.0684353	2.3995	0.416753	0.592994		5.55547e-06	0.000643724	0.593316	0.0204052
						0.394035	0.401482	2.3646	0.422904	0.533109		3.89554e-07	0.000459351	0.533338	0.00200513		0.0685383	0.0688888	2.39947	0.416758	0.593638		5.5558e-06	0.000643762	0.59396	0.0204052
						0.394492	0.40153	2.3646	0.422904	0.533568		3.86624e-07	0.000458943	0.533798	0.00199182		0.0689952	0.0693424	2.39944	0.416764	0.594281		5.55613e-06	0.0006438	0.594603	0.0204052
						0.394948	0.401574	2.3646	0.422905	0.534027		3.83924e-07	0.000458598	0.534256	0.00197939		0.069452	0.069796	2.39941	0.41677	0.594925		5.55644e-06	0.000643836	0.595247	0.0204052
						0.395405	0.401614	2.3646	0.422905	0.534486		3.81438e-07	0.000458308	0.534715	0.00196782		0.0699088	0.0702497	2.39938	0.416775	0.595569		5.53049e-06	0.000643872	0.595891	0.0203088
						0.395862	0.401651	2.36459	0.422905	0.534944		3.79149e-07	0.000458064	0.535173	0.00195706		0.0703656	0.0707035	2.39934	0.416781	0.596213		5.49107e-06	0.000643838	0.596535	0.0201651
						0.396319	0.401684	2.36459	0.422906	0.535402		3.77044e-07	0.000457859	0.535631	0.00194706		0.0708225	0.0711572	2.39931	0.416786	0.596857		5.49137e-06	0.000643873	0.597179	0.0201651
						0.396776	0.401715	2.36459	0.422906	0.53586		3.60995e-07	0.000457687	0.536089	0.00186489		0.0712793	0.0716109	2.39928	0.416792	0.597501		5.49167e-06	0.000643908	0.597823	0.0201651
						0.397233	0.401743	2.36459	0.422907	0.536318		3.31799e-07	0.000457608	0.536546	0.00171436		0.0717361	0.0720647	2.39925	0.416797	0.598145		5.49196e-06	0.000643942	0.598467	0.0201651
						0.397689	0.40177	2.36459	0.422907	0.536775		3.3095e-07	0.000457595	0.537004	0.00171002		0.072193	0.0725185	2.39922	0.416803	0.598789		5.49225e-06	0.000643976	0.599111	0.0201651
						0.398146	0.401796	2.36458	0.422907	0.537233		3.30791e-07	0.000457581	0.537462	0.00170924		0.0726498	0.0729724	2.39919	0.416808	0.599433		5.93391e-06	0.000644008	0.599755	0.0217856
						0.398603	0.401822	2.36458	0.422908	0.53769		3.3063e-07	0.000457568	0.537919	0.00170847		0.0731066	0.0734263	2.39915	0.416814	0.600077		5.99262e-06	0.00064404	0.600399	0.022
						0.39906	0.401848	2.36458	0.422908	0.538148		3.3047e-07	0.000457555	0.538377	0.00170769		0.0735634	0.0738803	2.39912	0.41682	0.600721		5.99292e-06	0.000644072	0.601043	0.022
						0.399517	0.401874	2.36458	0.422908	0.538605		3.30308e-07	0.000457542	0.538834	0.0017069		0.0740203	0.0743343	2.39908	0.416826	0.601365		5.9932e-06	0.000644102	0.601687	0.022
						0.399973	0.401899	2.36458	0.422909	0.539063		3.30144e-07	0.000457528	0.539292	0.0017061		0.0744771	0.0747884	2.39905	0.416832	0.602009		5.99348e-06	0.000644132	0.602331	0.022
						0.40043	0.401925	2.36458	0.422909	0.539521		3.29977e-07	0.000457515	0.539749	0.00170529		0.0749339	0.0752425	2.39901	0.416838	0.602653		5.96733e-06	0.000644162	0.602975	0.0219031
						0.400887	0.40195	2.36457	0.422909	0.539978		3.29802e-07	0.000457501	0.540207	0.00170444		0.0753908	0.0756967	2.39898	0.416844	0.603297		5.92132e-06	0.00064413	0.603619	0.0217352
						0.401344	0.401975	2.36457	0.42291	0.540436		3.29609e-07	0.000457486	0.540664	0.00170349		0.0758476	0.0761508	2.39895	0.41685	0.603941		5.92159e-06	0.000644159	0.604263	0.0217352
						0.401801	0.401999	2.36457	0.42291	0.540893		1.50815e-07	0.000457463	0.541122	0.000779484		0.0763044	0.0766049	2.39891	0.416856	0.604585		5.92186e-06	0.000644188	0.604907	0.0217352
						0.402258	0.402023	2.36457	0.42291	0.54135		0	0.000247938	0.541474	0		0.0767613	0.0770591	2.39888	0.416862	0.60523		5.92212e-06	0.000644216	0.605552	0.0217352
						0.40201	0.40201	2.36457	0.42291	0.541598							0.0772181	0.0775133	2.39884	0.416868	0.605874		5.92237e-06	0.000644244	0.606196	0.0217352
																	0.0776749	0.0779676	2.39881	0.416874	0.606518		6.35753e-06	0.000644271	0.60684	0.0233313
																	0.0781317	0.0784219	2.39877	0.41688	0.607162		6.43436e-06	0.000644298	0.607484	0.0236123
																	0.0785886	0.0788762	2.39874	0.416886	0.607807		6.43462e-06	0.000644324	0.608129	0.0236123
																	0.0790454	0.0793306	2.3987	0.416893	0.608451		6.43488e-06	0.000644349	0.608773	0.0236123
																	0.0795022	0.079785	2.39866	0.416899	0.609095		6.43513e-06	0.000644374	0.609417	0.0236123
																	0.0799591	0.0802395	2.39862	0.416906	0.60974		6.40867e-06	0.000644399	0.610062	0.0235143
																	0.0804159	0.080694	2.39859	0.416912	0.610384		6.35553e-06	0.000644369	0.610706	0.0233204
																	0.0808727	0.0811484	2.39855	0.416918	0.611028		6.35577e-06	0.000644394	0.611351	0.0233204
																	0.0813295	0.0816029	2.39851	0.416925	0.611673		6.35601e-06	0.000644418	0.611995	0.0233204
																	0.0817864	0.0820574	2.39848	0.416931	0.612317		6.35624e-06	0.000644442	0.612639	0.0233204
																	0.0822432	0.0825119	2.39844	0.416938	0.612962		6.35647e-06	0.000644465	0.613284	0.0233204
																	0.0827	0.0829665	2.3984	0.416944	0.613606		6.78646e-06	0.000644488	0.613928	0.0248971
																	0.0831569	0.0834211	2.39837	0.416951	0.614251		6.88001e-06	0.00064451	0.614573	0.0252394
																	0.0836137	0.0838758	2.39833	0.416958	0.614895		6.88024e-06	0.000644532	0.615217	0.0252394
																	0.0840705	0.0843304	2.39829	0.416964	0.61554		6.88047e-06	0.000644553	0.615862	0.0252394
																	0.0845274	0.0847851	2.39825	0.416971	0.616184		6.8807e-06	0.000644574	0.616506	0.0252394
																	0.0849842	0.0852399	2.39821	0.416978	0.616829		6.85386e-06	0.000644595	0.617151	0.0251401
																	0.085441	0.0856946	2.39817	0.416985	0.617473		6.79297e-06	0.000644569	0.617796	0.0249178
																	0.0858978	0.0861494	2.39813	0.416992	0.618118		6.79319e-06	0.000644589	0.61844	0.0249178
																	0.0863547	0.0866041	2.39809	0.416999	0.618762		6.7934e-06	0.00064461	0.619085	0.0249178
																	0.0868115	0.0870589	2.39805	0.417005	0.619407		6.79361e-06	0.00064463	0.619729	0.0249178
																	0.0872683	0.0875137	2.39801	0.417012	0.620052		6.79382e-06	0.000644649	0.620374	0.0249178
																	0.0877252	0.0879686	2.39797	0.417019	0.620696		7.21964e-06	0.000644669	0.621019	0.0264788
																	0.088182	0.0884234	2.39793	0.417026	0.621341		7.3287e-06	0.000644687	0.621663	0.026878
																	0.0886388	0.0888783	2.39789	0.417034	0.621986		7.32891e-06	0.000644706	0.622308	0.026878
																	0.0890957	0.0893332	2.39785	0.417041	0.62263		7.32912e-06	0.000644724	0.622953	0.026878
																	0.0895525	0.0897882	2.3978	0.417048	0.623275		7.32932e-06	0.000644742	0.623598	0.026878
																	0.0900093	0.0902432	2.39776	0.417056	0.62392		7.30203e-06	0.00064476	0.624242	0.0267772
																	0.0904661	0.0906982	2.39772	0.417063	0.624565		7.23275e-06	0.000644736	0.624887	0.0265241
																	0.090923	0.0911531	2.39768	0.41707	0.625209		7.23294e-06	0.000644754	0.625532	0.0265241
																	0.0913798	0.0916081	2.39764	0.417077	0.625854		7.23314e-06	0.000644771	0.626177	0.0265241
																	0.0918366	0.0920631	2.3976	0.417085	0.626499		7.23333e-06	0.000644788	0.626821	0.0265241
																	0.0922935	0.0925182	2.39755	0.417092	0.627144		7.23352e-06	0.000644805	0.627466	0.0265241
																	0.0927503	0.0929732	2.39751	0.417099	0.627789		7.65587e-06	0.000644821	0.628111	0.028072
																	0.0932071	0.0934283	2.39747	0.417107	0.628433		7.77936e-06	0.000644838	0.628756	0.0285242
																	0.0936639	0.0938834	2.39742	0.417114	0.629078		7.77956e-06	0.000644853	0.629401	0.0285242
																	0.0941208	0.0943385	2.39738	0.417122	0.629723		7.77974e-06	0.000644869	0.630045	0.0285242
																	0.0945776	0.0947937	2.39733	0.41713	0.630368		7.77993e-06	0.000644884	0.63069	0.0285242
																	0.0950344	0.0952489	2.39729	0.417138	0.631013		7.75213e-06	0.000644899	0.631335	0.0284216
																	0.0954913	0.0957041	2.39724	0.417146	0.631658		7.67376e-06	0.000644878	0.63198	0.0281352
																	0.0959481	0.0961592	2.3972	0.417153	0.632303		7.67395e-06	0.000644894	0.632625	0.0281352
																	0.0964049	0.0966144	2.39716	0.417161	0.632947		7.67412e-06	0.000644909	0.63327	0.0281352
																	0.0968618	0.0970696	2.39711	0.417169	0.633592		7.6743e-06	0.000644923	0.633915	0.0281352
																	0.0973186	0.0975248	2.39707	0.417176	0.634237		7.67447e-06	0.000644938	0.63456	0.0281352
																	0.0977754	0.0979801	2.39702	0.417184	0.634882		8.0938e-06	0.000644952	0.635205	0.0296718
																	0.0982322	0.0984354	2.39698	0.417192	0.635527		8.23074e-06	0.000644966	0.63585	0.0301732
																	0.0986891	0.0988906	2.39693	0.4172	0.636172		8.23092e-06	0.000644979	0.636495	0.0301732
																	0.0991459	0.099346	2.39688	0.417208	0.636817		8.23109e-06	0.000644993	0.63714	0.0301732
																	0.0996027	0.0998013	2.39684	0.417217	0.637462		8.23126e-06	0.000645006	0.637785	0.0301732
																	0.10006	0.100257	2.39679	0.417225	0.638107		8.20291e-06	0.000645019	0.63843	0.0300687
																	0.100516	0.100712	2.39674	0.417233	0.638752		8.11474e-06	0.000645001	0.639075	0.0297463
																	0.100973	0.101167	2.3967	0.417241	0.639397		8.1149e-06	0.000645014	0.63972	0.0297463
																	0.10143	0.101623	2.39665	0.417249	0.640042		8.11506e-06	0.000645027	0.640365	0.0297463
																	0.101887	0.102078	2.3966	0.417257	0.640687		8.11522e-06	0.000645039	0.64101	0.0297463
																	0.102344	0.102533	2.39656	0.417266	0.641332		8.11538e-06	0.000645052	0.641655	0.0297463
																	0.102801	0.102989	2.39651	0.417274	0.641977		8.53192e-06	0.000645064	0.6423	0.0312726
																	0.103257	0.103444	2.39646	0.417282	0.642622		8.68136e-06	0.000645076	0.642945	0.0318197
																	0.103714	0.1039	2.39641	0.417291	0.643267		8.68152e-06	0.000645088	0.64359	0.0318197
																	0.104171	0.104355	2.39636	0.4173	0.643913		8.68168e-06	0.0006451	0.644235	0.0318197
																	0.104628	0.104811	2.39631	0.417308	0.644558		8.68184e-06	0.000645111	0.64488	0.0318197
																	0.105085	0.105266	2.39626	0.417317	0.645203		8.65291e-06	0.000645122	0.645525	0.0317131
																	0.105542	0.105722	2.39621	0.417326	0.645848		8.55418e-06	0.000645106	0.64617	0.0313521
																	0.105998	0.106177	2.39616	0.417334	0.646493		8.55433e-06	0.000645118	0.646816	0.0313521
																	0.106455	0.106633	2.39611	0.417343	0.647138		8.55448e-06	0.000645129	0.647461	0.0313521
																	0.106912	0.107088	2.39606	0.417351	0.647783		8.55463e-06	0.00064514	0.648106	0.0313521
																	0.107369	0.107544	2.39601	0.41736	0.648428		8.55477e-06	0.000645151	0.648751	0.0313521
																	0.107826	0.107999	2.39596	0.417368	0.649073		8.96857e-06	0.000645161	0.649396	0.0328681
																	0.108282	0.108455	2.39591	0.417377	0.649719		9.12957e-06	0.000645172	0.650041	0.0334576
																	0.108739	0.10891	2.39586	0.417386	0.650364		9.12972e-06	0.000645182	0.650686	0.0334576
																	0.109196	0.109366	2.39581	0.417396	0.651009		9.12986e-06	0.000645192	0.651332	0.0334576
																	0.109653	0.109822	2.39576	0.417405	0.651654		9.13001e-06	0.000645202	0.651977	0.0334576
																	0.11011	0.110277	2.3957	0.417414	0.652299		9.10048e-06	0.000645212	0.652622	0.0333489
																	0.110567	0.110733	2.39565	0.417423	0.652945		8.99043e-06	0.000645198	0.653267	0.0329463
																	0.111023	0.111189	2.3956	0.417432	0.65359		8.99057e-06	0.000645208	0.653912	0.0329463
																	0.11148	0.111644	2.39555	0.417441	0.654235		8.99071e-06	0.000645218	0.654558	0.0329463
																	0.111937	0.1121	2.3955	0.41745	0.65488		8.99084e-06	0.000645228	0.655203	0.0329463
																	0.112394	0.112555	2.39545	0.417459	0.655525		8.99097e-06	0.000645237	0.655848	0.0329463
																	0.112851	0.113011	2.39539	0.417468	0.656171		9.40189e-06	0.000645246	0.656493	0.0344516
																	0.113308	0.113467	2.39534	0.417477	0.656816		9.57352e-06	0.000645255	0.657139	0.03508
																	0.113764	0.113922	2.39528	0.417487	0.657461		9.57365e-06	0.000645265	0.657784	0.03508
																	0.114221	0.114378	2.39523	0.417496	0.658106		9.57379e-06	0.000645273	0.658429	0.03508
																	0.114678	0.114834	2.39517	0.417506	0.658752		9.57392e-06	0.000645282	0.659074	0.03508
																	0.115135	0.11529	2.39512	0.417516	0.659397		9.54378e-06	0.000645291	0.65972	0.0349691
																	0.115592	0.115745	2.39507	0.417525	0.660042		9.42163e-06	0.000645279	0.660365	0.0345222
																	0.116049	0.116201	2.39501	0.417535	0.660688		9.42176e-06	0.000645288	0.66101	0.0345222
																	0.116505	0.116657	2.39496	0.417544	0.661333		9.42189e-06	0.000645296	0.661656	0.0345222
																	0.116962	0.117113	2.3949	0.417553	0.661978		9.42201e-06	0.000645305	0.662301	0.0345222
																	0.117419	0.117568	2.39485	0.417563	0.662623		9.42213e-06	0.000645313	0.662946	0.0345222
																	0.117876	0.118024	2.3948	0.417572	0.663269		9.82989e-06	0.000645321	0.663591	0.0360157
																	0.118333	0.11848	2.39474	0.417582	0.663914		1.00112e-05	0.000645329	0.664237	0.0366794
																	0.11879	0.118936	2.39468	0.417592	0.664559		1.00113e-05	0.000645337	0.664882	0.0366794
																	0.119246	0.119392	2.39462	0.417602	0.665205		1.00114e-05	0.000645345	0.665527	0.0366794
																	0.119703	0.119847	2.39457	0.417612	0.66585		1.00115e-05	0.000645353	0.666173	0.0366794
																	0.12016	0.120303	2.39451	0.417622	0.666495		9.98078e-06	0.00064536	0.666818	0.0365664
																	0.120617	0.120759	2.39445	0.417632	0.667141		9.84576e-06	0.00064535	0.667464	0.0360722
																	0.121074	0.121215	2.3944	0.417642	0.667786		9.84588e-06	0.000645358	0.668109	0.0360722
																	0.121531	0.121671	2.39434	0.417652	0.668432		9.84599e-06	0.000645365	0.668754	0.0360722
																	0.121987	0.122127	2.39428	0.417662	0.669077		9.8461e-06	0.000645373	0.6694	0.0360722
																	0.122444	0.122583	2.39423	0.417672	0.669722		9.84621e-06	0.00064538	0.670045	0.0360722
																	0.122901	0.123038	2.39417	0.417681	0.670368		1.02504e-05	0.000645387	0.67069	0.0375525
																	0.123358	0.123494	2.39411	0.417692	0.671013		1.04403e-05	0.000645394	0.671336	0.0382479
																	0.123815	0.12395	2.39405	0.417702	0.671658		1.04404e-05	0.000645401	0.671981	0.0382479
																	0.124272	0.124406	2.39399	0.417712	0.672304		1.04405e-05	0.000645408	0.672627	0.0382479
																	0.124728	0.124862	2.39393	0.417723	0.672949		1.04406e-05	0.000645415	0.673272	0.0382479
																	0.125185	0.125318	2.39387	0.417733	0.673595		1.04093e-05	0.000645422	0.673917	0.0381326
																	0.125642	0.125774	2.39381	0.417744	0.67424		1.02606e-05	0.000645413	0.674563	0.0375885
																	0.126099	0.12623	2.39375	0.417754	0.674885		1.02607e-05	0.00064542	0.675208	0.0375885
																	0.126556	0.126686	2.39369	0.417764	0.675531		1.02608e-05	0.000645427	0.675854	0.0375885
																	0.127013	0.127142	2.39364	0.417775	0.676176		1.02609e-05	0.000645433	0.676499	0.0375885
																	0.127469	0.127598	2.39358	0.417785	0.676822		1.0261e-05	0.00064544	0.677144	0.0375885
																	0.127926	0.128054	2.39352	0.417795	0.677467		1.06611e-05	0.000645446	0.67779	0.0390535
																	0.128383	0.12851	2.39346	0.417806	0.678113		1.08586e-05	0.000645452	0.678435	0.0397767
																	0.12884	0.128965	2.39339	0.417817	0.678758		1.08587e-05	0.000645458	0.679081	0.0397767
																	0.129297	0.129421	2.39333	0.417827	0.679404		1.08588e-05	0.000645464	0.679726	0.0397767
																	0.129753	0.129877	2.39327	0.417838	0.680049		1.08589e-05	0.00064547	0.680372	0.0397767
																	0.13021	0.130333	2.39321	0.417849	0.680695		1.08269e-05	0.000645476	0.681017	0.0396592
																	0.130667	0.130789	2.39315	0.41786	0.68134		1.06639e-05	0.00064547	0.681663	0.0390624
																	0.131124	0.131245	2.39308	0.417871	0.681985		1.0664e-05	0.000645476	0.682308	0.0390624
																	0.131581	0.131702	2.39302	0.417881	0.682631		1.06641e-05	0.000645481	0.682954	0.0390624
																	0.132038	0.132158	2.39296	0.417892	0.683276		1.06642e-05	0.000645487	0.683599	0.0390624
																	0.132494	0.132614	2.3929	0.417903	0.683922		1.06643e-05	0.000645493	0.684245	0.0390624
																	0.132951	0.13307	2.39284	0.417913	0.684567		1.10595e-05	0.000645498	0.68489	0.0405096
																	0.133408	0.133526	2.39278	0.417924	0.685213		1.12635e-05	0.000645504	0.685536	0.0412567
																	0.133865	0.133982	2.39271	0.417936	0.685858		1.12636e-05	0.000645509	0.686181	0.0412567
																	0.134322	0.134438	2.39265	0.417947	0.686504		1.12637e-05	0.000645515	0.686827	0.0412567
																	0.134779	0.134894	2.39258	0.417958	0.687149		1.12638e-05	0.00064552	0.687472	0.0412567
																	0.135235	0.13535	2.39252	0.417969	0.687795		1.12312e-05	0.000645525	0.688118	0.0411371
																	0.135692	0.135806	2.39246	0.417981	0.68844		1.10531e-05	0.00064552	0.688763	0.0404849
																	0.136149	0.136262	2.39239	0.417992	0.689086		1.10532e-05	0.000645525	0.689409	0.0404849
																	0.136606	0.136718	2.39233	0.418003	0.689732		1.10533e-05	0.00064553	0.690054	0.0404849
																	0.137063	0.137174	2.39227	0.418014	0.690377		1.10534e-05	0.000645535	0.6907	0.0404849
																	0.13752	0.13763	2.3922	0.418025	0.691023		1.10534e-05	0.00064554	0.691345	0.0404849
																	0.137976	0.138086	2.39214	0.418036	0.691668		1.1443e-05	0.000645545	0.691991	0.0419116
																	0.138433	0.138543	2.39207	0.418047	0.692314		1.16524e-05	0.00064555	0.692636	0.0426782
																	0.13889	0.138999	2.39201	0.418059	0.692959		1.16525e-05	0.000645555	0.693282	0.0426782
																	0.139347	0.139455	2.39194	0.418071	0.693605		1.16526e-05	0.00064556	0.693928	0.0426782
																	0.139804	0.139911	2.39187	0.418082	0.69425		1.16527e-05	0.000645564	0.694573	0.0426782
																	0.140261	0.140367	2.39181	0.418094	0.694896		1.16196e-05	0.000645569	0.695219	0.0425566
																	0.140717	0.140823	2.39174	0.418106	0.695541		1.14257e-05	0.000645565	0.695864	0.0418467
																	0.141174	0.141279	2.39167	0.418117	0.696187		1.14258e-05	0.00064557	0.69651	0.0418467
																	0.141631	0.141735	2.39161	0.418128	0.696833		1.14258e-05	0.000645574	0.697155	0.0418467
																	0.142088	0.142192	2.39154	0.41814	0.697478		1.14259e-05	0.000645579	0.697801	0.0418467
																	0.142545	0.142648	2.39148	0.418151	0.698124		1.1426e-05	0.000645583	0.698447	0.0418467
																	0.143002	0.143104	2.39141	0.418163	0.698769		1.18091e-05	0.000645588	0.699092	0.0432497
																	0.143458	0.14356	2.39135	0.418175	0.699415		1.20227e-05	0.000645592	0.699738	0.0440315
																	0.143915	0.144016	2.39128	0.418187	0.700061		1.20228e-05	0.000645596	0.700383	0.0440315
																	0.144372	0.144472	2.39121	0.418199	0.700706		1.20229e-05	0.0006456	0.701029	0.0440315
																	0.144829	0.144929	2.39114	0.418211	0.701352		1.20229e-05	0.000645604	0.701675	0.0440315
																	0.145286	0.145385	2.39107	0.418223	0.701997		1.19893e-05	0.000645609	0.70232	0.043908
																	0.145743	0.145841	2.391	0.418235	0.702643		1.1779e-05	0.000645606	0.702966	0.0431381
																	0.146199	0.146297	2.39094	0.418246	0.703289		1.17791e-05	0.00064561	0.703611	0.0431381
																	0.146656	0.146753	2.39087	0.418258	0.703934		1.17792e-05	0.000645614	0.704257	0.0431381
																	0.147113	0.14721	2.3908	0.41827	0.70458		1.17792e-05	0.000645618	0.704903	0.0431381
																	0.14757	0.147666	2.39073	0.418282	0.705225		1.17793e-05	0.000645622	0.705548	0.0431381
																	0.148027	0.148122	2.39067	0.418294	0.705871		1.21551e-05	0.000645626	0.706194	0.0445139
																	0.148484	0.148578	2.3906	0.418306	0.706517		1.23715e-05	0.000645629	0.706839	0.0453064
																	0.14894	0.149034	2.39053	0.418318	0.707162		1.23716e-05	0.000645633	0.707485	0.0453064
																	0.149397	0.149491	2.39045	0.41833	0.707808		1.23717e-05	0.000645637	0.708131	0.0453064
																	0.149854	0.149947	2.39038	0.418343	0.708454		1.23717e-05	0.000645641	0.708776	0.0453064
																	0.150311	0.150403	2.39031	0.418355	0.709099		1.23376e-05	0.000645644	0.709422	0.0451811
																	0.150768	0.150859	2.39024	0.418367	0.709745		1.21104e-05	0.000645643	0.710068	0.0443492
																	0.151224	0.151316	2.39017	0.41838	0.71039		1.21105e-05	0.000645646	0.710713	0.0443492
																	0.151681	0.151772	2.3901	0.418392	0.711036		1.21105e-05	0.00064565	0.711359	0.0443492
																	0.152138	0.152228	2.39004	0.418404	0.711682		1.21106e-05	0.000645653	0.712005	0.0443492
																	0.152595	0.152684	2.38997	0.418416	0.712327		1.21107e-05	0.000645657	0.71265	0.0443492
																	0.153052	0.153141	2.3899	0.418428	0.712973		1.2478e-05	0.00064566	0.713296	0.0456943
																	0.153509	0.153597	2.38983	0.418441	0.713619		1.26961e-05	0.000645663	0.713942	0.0464927
																	0.153965	0.154053	2.38975	0.418453	0.714264		1.26962e-05	0.000645667	0.714587	0.0464927
																	0.154422	0.15451	2.38968	0.418466	0.71491		1.26963e-05	0.00064567	0.715233	0.0464927
																	0.154879	0.154966	2.38961	0.418479	0.715556		1.26963e-05	0.000645673	0.715879	0.0464927
																	0.155336	0.155422	2.38954	0.418491	0.716201		1.26617e-05	0.000645677	0.716524	0.0463657
																	0.155793	0.155878	2.38946	0.418504	0.716847		1.24172e-05	0.000645676	0.71717	0.0454703
																	0.15625	0.156335	2.38939	0.418516	0.717493		1.24173e-05	0.000645679	0.717816	0.0454703
																	0.156706	0.156791	2.38932	0.418529	0.718138		1.24173e-05	0.000645682	0.718461	0.0454703
																	0.157163	0.157247	2.38925	0.418541	0.718784		1.24174e-05	0.000645685	0.719107	0.0454703
																	0.15762	0.157704	2.38918	0.418554	0.71943		1.24174e-05	0.000645688	0.719753	0.0454703
																	0.158077	0.15816	2.38911	0.418566	0.720075		1.27754e-05	0.000645691	0.720398	0.0467807
																	0.158534	0.158616	2.38904	0.418579	0.720721		1.29938e-05	0.000645694	0.721044	0.0475804
																	0.158991	0.159073	2.38896	0.418592	0.721367		1.29938e-05	0.000645697	0.72169	0.0475804
																	0.159447	0.159529	2.38889	0.418605	0.722013		1.29939e-05	0.0006457	0.722335	0.0475804
																	0.159904	0.159985	2.38881	0.418618	0.722658		1.2994e-05	0.000645703	0.722981	0.0475804
																	0.160361	0.160442	2.38874	0.418631	0.723304		1.29589e-05	0.000645706	0.723627	0.0474519
																	0.160818	0.160898	2.38867	0.418644	0.72395		1.26967e-05	0.000645706	0.724273	0.0464916
																	0.161275	0.161354	2.38859	0.418656	0.724595		1.26967e-05	0.000645709	0.724918	0.0464916
																	0.161732	0.161811	2.38852	0.418669	0.725241		1.26968e-05	0.000645712	0.725564	0.0464916
																	0.162188	0.162267	2.38845	0.418682	0.725887		1.26969e-05	0.000645714	0.72621	0.0464916
																	0.162645	0.162723	2.38838	0.418695	0.726532		1.26969e-05	0.000645717	0.726855	0.0464916
																	0.163102	0.16318	2.3883	0.418707	0.727178		1.30443e-05	0.00064572	0.727501	0.0477635
																	0.163559	0.163636	2.38823	0.41872	0.727824		1.32617e-05	0.000645722	0.728147	0.0485594
																	0.164016	0.164092	2.38815	0.418734	0.72847		1.32618e-05	0.000645725	0.728793	0.0485594
																	0.164473	0.164549	2.38808	0.418747	0.729115		1.32618e-05	0.000645728	0.729438	0.0485594
																	0.164929	0.165005	2.388	0.41876	0.729761		1.32619e-05	0.00064573	0.730084	0.0485594
																	0.165386	0.165461	2.38793	0.418773	0.730407		1.32265e-05	0.000645733	0.73073	0.0484296
																	0.165843	0.165918	2.38785	0.418787	0.731053		1.29463e-05	0.000645734	0.731375	0.0474037
																	0.1663	0.166374	2.38778	0.4188	0.731698		1.29464e-05	0.000645736	0.732021	0.0474037
																	0.166757	0.166831	2.3877	0.418812	0.732344		1.29464e-05	0.000645739	0.732667	0.0474037
																	0.167214	0.167287	2.38763	0.418825	0.73299		1.29465e-05	0.000645741	0.733313	0.0474037
																	0.16767	0.167743	2.38756	0.418838	0.733636		1.29465e-05	0.000645743	0.733958	0.0474037
																	0.168127	0.1682	2.38748	0.418851	0.734281		1.32823e-05	0.000645746	0.734604	0.048633
																	0.168584	0.168656	2.38741	0.418865	0.734927		1.34974e-05	0.000645748	0.73525	0.0494203
																	0.169041	0.169113	2.38733	0.418878	0.735573		1.34974e-05	0.00064575	0.735896	0.0494203
																	0.169498	0.169569	2.38725	0.418892	0.736219		1.34975e-05	0.000645753	0.736541	0.0494203
																	0.169954	0.170025	2.38718	0.418905	0.736864		1.34975e-05	0.000645755	0.737187	0.0494203
																	0.170411	0.170482	2.3871	0.418919	0.73751		1.34618e-05	0.000645757	0.737833	0.0492894
																	0.170868	0.170938	2.38702	0.418932	0.738156		1.31636e-05	0.000645759	0.738479	0.0481974
																	0.171325	0.171395	2.38695	0.418945	0.738802		1.31636e-05	0.000645761	0.739124	0.0481974
																	0.171782	0.171851	2.38687	0.418958	0.739447		1.31637e-05	0.000645763	0.73977	0.0481974
																	0.172239	0.172307	2.3868	0.418972	0.740093		1.31637e-05	0.000645765	0.740416	0.0481974
																	0.172695	0.172764	2.38672	0.418985	0.740739		1.31638e-05	0.000645767	0.741062	0.0481974
																	0.173152	0.17322	2.38665	0.418998	0.741385		1.34869e-05	0.000645769	0.741707	0.0493803
																	0.173609	0.173677	2.38657	0.419011	0.74203		1.36983e-05	0.000645771	0.742353	0.050154
																	0.174066	0.174133	2.38649	0.419025	0.742676		1.36983e-05	0.000645773	0.742999	0.050154
																	0.174523	0.17459	2.38641	0.419039	0.743322		1.36983e-05	0.000645775	0.743645	0.050154
																	0.17498	0.175046	2.38634	0.419052	0.743968		1.36984e-05	0.000645777	0.744291	0.050154
																	0.175436	0.175502	2.38626	0.419066	0.744613		1.36624e-05	0.000645779	0.744936	0.0500222
																	0.175893	0.175959	2.38618	0.41908	0.745259		1.33462e-05	0.000645782	0.745582	0.0488642
																	0.17635	0.176415	2.3861	0.419093	0.745905		1.33462e-05	0.000645783	0.746228	0.0488642
																	0.176807	0.176872	2.38603	0.419106	0.746551		1.33463e-05	0.000645785	0.746874	0.0488642
																	0.177264	0.177328	2.38595	0.41912	0.747197		1.33463e-05	0.000645787	0.747519	0.0488642
																	0.177721	0.177785	2.38588	0.419133	0.747842		1.33463e-05	0.000645789	0.748165	0.0488642
																	0.178177	0.178241	2.3858	0.419147	0.748488		1.36557e-05	0.000645791	0.748811	0.0499967
																	0.178634	0.178698	2.38572	0.41916	0.749134		1.38621e-05	0.000645793	0.749457	0.0507521
																	0.179091	0.179154	2.38564	0.419174	0.74978		1.38621e-05	0.000645794	0.750103	0.0507521
																	0.179548	0.17961	2.38556	0.419188	0.750426		1.38622e-05	0.000645796	0.750748	0.0507521
																	0.180005	0.180067	2.38549	0.419202	0.751071		1.38622e-05	0.000645798	0.751394	0.0507521
																	0.180462	0.180523	2.38541	0.419216	0.751717		1.38261e-05	0.0006458	0.75204	0.0506197
																	0.180918	0.18098	2.38533	0.419229	0.752363		1.3492e-05	0.000645802	0.752686	0.0493963
																	0.181375	0.181436	2.38525	0.419243	0.753009		1.3492e-05	0.000645804	0.753332	0.0493963
																	0.181832	0.181893	2.38518	0.419256	0.753655		1.3492e-05	0.000645806	0.753977	0.0493963
																	0.182289	0.182349	2.3851	0.41927	0.7543		1.34921e-05	0.000645807	0.754623	0.0493963
																	0.182746	0.182806	2.38502	0.419283	0.754946		1.34921e-05	0.000645809	0.755269	0.0493963
																	0.183203	0.183262	2.38494	0.419297	0.755592		1.37867e-05	0.000645811	0.755915	0.0504748
																	0.183659	0.183719	2.38487	0.419311	0.756238		1.39868e-05	0.000645812	0.756561	0.0512072
																	0.184116	0.184175	2.38479	0.419325	0.756884		1.39868e-05	0.000645814	0.757206	0.0512072
																	0.184573	0.184632	2.38471	0.419339	0.757529		1.39869e-05	0.000645815	0.757852	0.0512072
																	0.18503	0.185088	2.38463	0.419353	0.758175		1.39869e-05	0.000645817	0.758498	0.0512072
																	0.185487	0.185545	2.38455	0.419367	0.758821		1.39507e-05	0.000645818	0.759144	0.0510744
																	0.185944	0.186001	2.38447	0.419381	0.759467		1.3599e-05	0.000645822	0.75979	0.0497869
																	0.1864	0.186458	2.38439	0.419394	0.760113		1.35991e-05	0.000645823	0.760436	0.0497869
																	0.186857	0.186914	2.38431	0.419408	0.760758		1.35991e-05	0.000645824	0.761081	0.0497869
																	0.187314	0.187371	2.38424	0.419421	0.761404		1.35991e-05	0.000645826	0.761727	0.0497869
																	0.187771	0.187827	2.38416	0.419435	0.76205		1.35992e-05	0.000645827	0.762373	0.0497869
																	0.188228	0.188284	2.38408	0.419449	0.762696		1.3878e-05	0.000645829	0.763019	0.0508078
																	0.188685	0.18874	2.384	0.419462	0.763342		1.40706e-05	0.00064583	0.763665	0.0515127
																	0.189141	0.189197	2.38392	0.419477	0.763988		1.40707e-05	0.000645831	0.764311	0.0515127
																	0.189598	0.189653	2.38384	0.419491	0.764633		1.40707e-05	0.000645833	0.764956	0.0515127
																	0.190055	0.19011	2.38376	0.419505	0.765279		1.40707e-05	0.000645834	0.765602	0.0515127
																	0.190512	0.190566	2.38368	0.419519	0.765925		1.40344e-05	0.000645836	0.766248	0.0513798
																	0.190969	0.191023	2.3836	0.419533	0.766571		1.36658e-05	0.000645839	0.766894	0.0500299
																	0.191425	0.191479	2.38353	0.419546	0.767217		1.36658e-05	0.00064584	0.76754	0.0500299
																	0.191882	0.191936	2.38345	0.41956	0.767863		1.36658e-05	0.000645842	0.768186	0.0500299
																	0.192339	0.192392	2.38337	0.419574	0.768508		1.36659e-05	0.000645843	0.768831	0.0500299
																	0.192796	0.192849	2.38329	0.419587	0.769154		1.36659e-05	0.000645844	0.769477	0.0500299
																	0.193253	0.193305	2.38322	0.419601	0.7698		1.39282e-05	0.000645845	0.770123	0.0509901
																	0.19371	0.193762	2.38314	0.419615	0.770446		1.41121e-05	0.000645847	0.770769	0.0516633
																	0.194166	0.194218	2.38306	0.419629	0.771092		1.41122e-05	0.000645848	0.771415	0.0516633
																	0.194623	0.194675	2.38298	0.419643	0.771738		1.41122e-05	0.000645849	0.772061	0.0516633
																	0.19508	0.195132	2.3829	0.419657	0.772384		1.41122e-05	0.00064585	0.772706	0.0516633
																	0.195537	0.195588	2.38282	0.419672	0.773029		1.4076e-05	0.000645851	0.773352	0.0515305
																	0.195994	0.196045	2.38274	0.419686	0.773675		1.36909e-05	0.000645855	0.773998	0.0501206
																	0.196451	0.196501	2.38266	0.419699	0.774321		1.36909e-05	0.000645856	0.774644	0.0501206
																	0.196907	0.196958	2.38258	0.419713	0.774967		1.3691e-05	0.000645857	0.77529	0.0501206
																	0.197364	0.197414	2.3825	0.419727	0.775613		1.3691e-05	0.000645858	0.775936	0.0501206
																	0.197821	0.197871	2.38243	0.41974	0.776259		1.3691e-05	0.000645859	0.776582	0.0501206
																	0.198278	0.198327	2.38235	0.419754	0.776905		1.3936e-05	0.000645861	0.777227	0.0510173
																	0.198735	0.198784	2.38227	0.419768	0.77755		1.41102e-05	0.000645862	0.777873	0.051655
																	0.199192	0.199241	2.38219	0.419782	0.778196		1.41102e-05	0.000645863	0.778519	0.051655
																	0.199648	0.199697	2.38211	0.419796	0.778842		1.41102e-05	0.000645864	0.779165	0.051655
																	0.200105	0.200154	2.38203	0.41981	0.779488		1.41102e-05	0.000645865	0.779811	0.051655
																	0.200562	0.20061	2.38195	0.419824	0.780134		1.40741e-05	0.000645866	0.780457	0.0515226
																	0.201019	0.201067	2.38187	0.419838	0.78078		1.36735e-05	0.00064587	0.781103	0.0500557
																	0.201476	0.201523	2.38179	0.419852	0.781426		1.36735e-05	0.000645871	0.781749	0.0500557
																	0.201933	0.20198	2.38171	0.419866	0.782071		1.36735e-05	0.000645872	0.782394	0.0500557
																	0.202389	0.202436	2.38164	0.41988	0.782717		1.36736e-05	0.000645873	0.78304	0.0500557
																	0.202846	0.202893	2.38156	0.419893	0.783363		1.36736e-05	0.000645874	0.783686	0.0500557
																	0.203303	0.20335	2.38148	0.419907	0.784009		1.39005e-05	0.000645875	0.784332	0.0508865
																	0.20376	0.203806	2.3814	0.419921	0.784655		1.4064e-05	0.000645875	0.784978	0.051485
																	0.204217	0.204263	2.38132	0.419935	0.785301		1.40641e-05	0.000645876	0.785624	0.051485
																	0.204674	0.204719	2.38124	0.419949	0.785947		1.40641e-05	0.000645877	0.78627	0.051485
																	0.20513	0.205176	2.38116	0.419963	0.786593		1.40641e-05	0.000645878	0.786916	0.051485
																	0.205587	0.205632	2.38108	0.419977	0.787238		1.40282e-05	0.000645879	0.787561	0.0513534
																	0.206044	0.206089	2.381	0.419991	0.787884		1.3613e-05	0.000645883	0.788207	0.0498331
																	0.206501	0.206546	2.38093	0.420005	0.78853		1.3613e-05	0.000645884	0.788853	0.0498331
																	0.206958	0.207002	2.38085	0.420018	0.789176		1.3613e-05	0.000645885	0.789499	0.0498331
																	0.207415	0.207459	2.38077	0.420032	0.789822		1.3613e-05	0.000645886	0.790145	0.0498331
																	0.207871	0.207915	2.38069	0.420045	0.790468		1.3613e-05	0.000645887	0.790791	0.0498331
																	0.208328	0.208372	2.38062	0.420059	0.791114		1.38214e-05	0.000645887	0.791437	0.050596
																	0.208785	0.208829	2.38054	0.420073	0.79176		1.39735e-05	0.000645888	0.792083	0.0511523
																	0.209242	0.209285	2.38046	0.420087	0.792406		1.39735e-05	0.000645889	0.792728	0.0511523
																	0.209699	0.209742	2.38038	0.420101	0.793051		1.39735e-05	0.00064589	0.793374	0.0511523
																	0.210155	0.210198	2.3803	0.420115	0.793697		1.39735e-05	0.000645891	0.79402	0.0511523
																	0.210612	0.210655	2.38022	0.420129	0.794343		1.39378e-05	0.000645891	0.794666	0.0510217
																	0.211069	0.211112	2.38014	0.420143	0.794989		1.35092e-05	0.000645896	0.795312	0.0494523
																	0.211526	0.211568	2.38007	0.420156	0.795635		1.35092e-05	0.000645897	0.795958	0.0494523
																	0.211983	0.212025	2.37999	0.42017	0.796281		1.35092e-05	0.000645897	0.796604	0.0494523
																	0.21244	0.212481	2.37991	0.420183	0.796927		1.35092e-05	0.000645898	0.79725	0.0494523
																	0.212896	0.212938	2.37984	0.420197	0.797573		1.35093e-05	0.000645899	0.797896	0.0494523
																	0.213353	0.213395	2.37976	0.42021	0.798219		1.36987e-05	0.000645899	0.798542	0.0501459
																	0.21381	0.213851	2.37968	0.420224	0.798864		1.38385e-05	0.0006459	0.799187	0.0506574
																	0.214267	0.214308	2.3796	0.420238	0.79951		1.38385e-05	0.000645901	0.799833	0.0506574
																	0.214724	0.214764	2.37953	0.420252	0.800156		1.38385e-05	0.000645901	0.800479	0.0506574
																	0.215181	0.215221	2.37945	0.420266	0.800802		1.38386e-05	0.000645902	0.801125	0.0506574
																	0.215637	0.215678	2.37937	0.420279	0.801448		1.38032e-05	0.000645903	0.801771	0.0505281
																	0.216094	0.216134	2.37929	0.420293	0.802094		1.33625e-05	0.000645907	0.802417	0.0489143
																	0.216551	0.216591	2.37922	0.420307	0.80274		1.33625e-05	0.000645908	0.803063	0.0489143
																	0.217008	0.217048	2.37914	0.42032	0.803386		1.33625e-05	0.000645908	0.803709	0.0489143
																	0.217465	0.217504	2.37906	0.420333	0.804032		1.33625e-05	0.000645909	0.804355	0.0489143
																	0.217922	0.217961	2.37899	0.420347	0.804678		1.33625e-05	0.00064591	0.805001	0.0489143
																	0.218378	0.218417	2.37891	0.42036	0.805324		1.35328e-05	0.00064591	0.805646	0.0495378
																	0.218835	0.218874	2.37884	0.420374	0.805969		1.36598e-05	0.000645911	0.806292	0.0500024
																	0.219292	0.219331	2.37876	0.420387	0.806615		1.36598e-05	0.000645911	0.806938	0.0500024
																	0.219749	0.219787	2.37868	0.420401	0.807261		1.36598e-05	0.000645912	0.807584	0.0500024
																	0.220206	0.220244	2.37861	0.420414	0.807907		1.36598e-05	0.000645913	0.80823	0.0500024
																	0.220663	0.220701	2.37853	0.420428	0.808553		1.3625e-05	0.000645913	0.808876	0.0498747
																	0.221119	0.221157	2.37845	0.420442	0.809199		1.31735e-05	0.000645918	0.809522	0.0482217
																	0.221576	0.221614	2.37838	0.420455	0.809845		1.31735e-05	0.000645918	0.810168	0.0482217
																	0.222033	0.22207	2.3783	0.420468	0.810491		1.31735e-05	0.000645919	0.810814	0.0482217
																	0.22249	0.222527	2.37823	0.420481	0.811137		1.31735e-05	0.000645919	0.81146	0.0482217
																	0.222947	0.222984	2.37815	0.420494	0.811783		1.31735e-05	0.00064592	0.812106	0.0482217
																	0.223404	0.22344	2.37808	0.420508	0.812429		1.33246e-05	0.00064592	0.812752	0.0487748
																	0.22386	0.223897	2.378	0.420521	0.813075		1.34384e-05	0.000645921	0.813397	0.0491911
																	0.224317	0.224354	2.37793	0.420534	0.81372		1.34384e-05	0.000645921	0.814043	0.0491911
																	0.224774	0.22481	2.37785	0.420548	0.814366		1.34384e-05	0.000645922	0.814689	0.0491911
																	0.225231	0.225267	2.37777	0.420561	0.815012		1.34384e-05	0.000645922	0.815335	0.0491911
																	0.225688	0.225724	2.3777	0.420575	0.815658		1.3404e-05	0.000645923	0.815981	0.0490652
																	0.226145	0.22618	2.37762	0.420588	0.816304		1.29434e-05	0.000645927	0.816627	0.0473789
																	0.226601	0.226637	2.37755	0.420601	0.81695		1.29434e-05	0.000645928	0.817273	0.0473789
																	0.227058	0.227094	2.37748	0.420614	0.817596		1.29435e-05	0.000645928	0.817919	0.0473789
																	0.227515	0.22755	2.3774	0.420627	0.818242		1.29435e-05	0.000645929	0.818565	0.0473789
																	0.227972	0.228007	2.37733	0.42064	0.818888		1.29435e-05	0.000645929	0.819211	0.0473789
																	0.228429	0.228463	2.37726	0.420653	0.819534		1.30754e-05	0.00064593	0.819857	0.047862
																	0.228886	0.22892	2.37718	0.420666	0.82018		1.31757e-05	0.00064593	0.820503	0.0482288
																	0.229342	0.229377	2.37711	0.420679	0.820826		1.31757e-05	0.00064593	0.821149	0.0482288
																	0.229799	0.229833	2.37703	0.420692	0.821472		1.31757e-05	0.000645931	0.821795	0.0482288
																	0.230256	0.23029	2.37696	0.420705	0.822117		1.31757e-05	0.000645931	0.82244	0.0482288
																	0.230713	0.230747	2.37689	0.420719	0.822763		1.31419e-05	0.000645932	0.823086	0.0481051
																	0.23117	0.231203	2.37681	0.420732	0.823409		1.26739e-05	0.000645936	0.823732	0.0463916
																	0.231626	0.23166	2.37674	0.420744	0.824055		1.26739e-05	0.000645937	0.824378	0.0463916
																	0.232083	0.232117	2.37667	0.420757	0.824701		1.26739e-05	0.000645937	0.825024	0.0463916
																	0.23254	0.232573	2.3766	0.42077	0.825347		1.26739e-05	0.000645937	0.82567	0.0463916
																	0.232997	0.23303	2.37652	0.420782	0.825993		1.26739e-05	0.000645938	0.826316	0.0463916
																	0.233454	0.233487	2.37645	0.420795	0.826639		1.2787e-05	0.000645938	0.826962	0.0468056
																	0.233911	0.233943	2.37638	0.420808	0.827285		1.28736e-05	0.000645938	0.827608	0.0471227
																	0.234367	0.2344	2.37631	0.420821	0.827931		1.28737e-05	0.000645939	0.828254	0.0471227
																	0.234824	0.234857	2.37624	0.420834	0.828577		1.28737e-05	0.000645939	0.8289	0.0471227
																	0.235281	0.235313	2.37616	0.420847	0.829223		1.28737e-05	0.000645939	0.829546	0.0471227
																	0.235738	0.23577	2.37609	0.420859	0.829869		1.28406e-05	0.00064594	0.830192	0.0470014
																	0.236195	0.236227	2.37602	0.420872	0.830515		1.23669e-05	0.000645945	0.830838	0.0452673
																	0.236652	0.236683	2.37595	0.420885	0.831161		1.23669e-05	0.000645945	0.831484	0.0452673
																	0.237108	0.23714	2.37588	0.420897	0.831807		1.23669e-05	0.000645945	0.83213	0.0452673
																	0.237565	0.237597	2.37581	0.420909	0.832453		1.23669e-05	0.000645945	0.832775	0.0452673
																	0.238022	0.238053	2.37574	0.420922	0.833098		1.23669e-05	0.000645946	0.833421	0.0452673
																	0.238479	0.23851	2.37567	0.420934	0.833744		1.24616e-05	0.000645946	0.834067	0.0456138
																	0.238936	0.238967	2.3756	0.420947	0.83439		1.25346e-05	0.000645946	0.834713	0.0458812
																	0.239393	0.239423	2.37553	0.420959	0.835036		1.25346e-05	0.000645946	0.835359	0.0458812
																	0.239849	0.23988	2.37546	0.420972	0.835682		1.25346e-05	0.000645947	0.836005	0.0458812
																	0.240306	0.240337	2.37539	0.420984	0.836328		1.25346e-05	0.000645947	0.836651	0.0458812
																	0.240763	0.240793	2.37532	0.420997	0.836974		1.25023e-05	0.000645947	0.837297	0.0457627
																	0.24122	0.24125	2.37525	0.421009	0.83762		1.20248e-05	0.000645952	0.837943	0.0440147
																	0.241677	0.241707	2.37518	0.421021	0.838266		1.20248e-05	0.000645952	0.838589	0.0440147
																	0.242134	0.242164	2.37511	0.421033	0.838912		1.20248e-05	0.000645953	0.839235	0.0440147
																	0.24259	0.24262	2.37504	0.421045	0.839558		1.20248e-05	0.000645953	0.839881	0.0440147
																	0.243047	0.243077	2.37497	0.421057	0.840204		1.20248e-05	0.000645953	0.840527	0.0440147
																	0.243504	0.243534	2.37491	0.421069	0.84085		1.21016e-05	0.000645953	0.841173	0.0442958
																	0.243961	0.24399	2.37484	0.421081	0.841496		1.21613e-05	0.000645953	0.841819	0.0445143
																	0.244418	0.244447	2.37477	0.421094	0.842142		1.21613e-05	0.000645954	0.842465	0.0445143
																	0.244875	0.244904	2.3747	0.421106	0.842788		1.21613e-05	0.000645954	0.843111	0.0445143
																	0.245331	0.24536	2.37463	0.421118	0.843434		1.21613e-05	0.000645954	0.843757	0.0445143
																	0.245788	0.245817	2.37456	0.42113	0.84408		1.21298e-05	0.000645954	0.844403	0.0443988
																	0.246245	0.246274	2.37449	0.421142	0.844726		1.16505e-05	0.000645959	0.845049	0.042644
																	0.246702	0.24673	2.37443	0.421154	0.845372		1.16505e-05	0.000645959	0.845695	0.042644
																	0.247159	0.247187	2.37436	0.421165	0.846017		1.16505e-05	0.000645959	0.84634	0.042644
																	0.247616	0.247644	2.3743	0.421177	0.846663		1.16505e-05	0.00064596	0.846986	0.042644
																	0.248072	0.2481	2.37423	0.421189	0.847309		1.16505e-05	0.00064596	0.847632	0.042644
																	0.248529	0.248557	2.37417	0.4212	0.847955		1.17101e-05	0.00064596	0.848278	0.0428623
																	0.248986	0.249014	2.3741	0.421212	0.848601		1.17568e-05	0.00064596	0.848924	0.0430333
																	0.249443	0.249471	2.37403	0.421224	0.849247		1.17568e-05	0.00064596	0.84957	0.0430333
																	0.2499	0.249927	2.37397	0.421236	0.849893		1.17568e-05	0.00064596	0.850216	0.0430333
																	0.250357	0.250384	2.3739	0.421247	0.850539		1.17568e-05	0.000645961	0.850862	0.0430333
																	0.250813	0.250841	2.37384	0.421259	0.851185		1.17262e-05	0.000645961	0.851508	0.042921
																	0.25127	0.251297	2.37377	0.421271	0.851831		1.12469e-05	0.000645965	0.852154	0.0411665
																	0.251727	0.251754	2.37371	0.421282	0.852477		1.12469e-05	0.000645966	0.8528	0.0411665
																	0.252184	0.252211	2.37364	0.421293	0.853123		1.12469e-05	0.000645966	0.853446	0.0411665
																	0.252641	0.252667	2.37358	0.421305	0.853769		1.12469e-05	0.000645966	0.854092	0.0411665
																	0.253097	0.253124	2.37352	0.421316	0.854415		1.12469e-05	0.000645966	0.854738	0.0411665
																	0.253554	0.253581	2.37345	0.421327	0.855061		1.12903e-05	0.000645966	0.855384	0.0413253
																	0.254011	0.254038	2.37339	0.421338	0.855707		1.13245e-05	0.000645966	0.85603	0.0414504
																	0.254468	0.254494	2.37333	0.42135	0.856353		1.13245e-05	0.000645966	0.856676	0.0414504
																	0.254925	0.254951	2.37326	0.421361	0.856999		1.13245e-05	0.000645966	0.857322	0.0414504
																	0.255382	0.255408	2.3732	0.421372	0.857645		1.13245e-05	0.000645966	0.857968	0.0414504
																	0.255838	0.255864	2.37313	0.421384	0.858291		1.12948e-05	0.000645967	0.858614	0.0413416
																	0.256295	0.256321	2.37307	0.421395	0.858937		1.08176e-05	0.000645971	0.85926	0.0395945
																	0.256752	0.256778	2.37301	0.421406	0.859583		1.08176e-05	0.000645971	0.859906	0.0395945
																	0.257209	0.257235	2.37295	0.421417	0.860229		1.08176e-05	0.000645972	0.860552	0.0395945
																	0.257666	0.257691	2.37289	0.421427	0.860875		1.08176e-05	0.000645972	0.861198	0.0395945
																	0.258123	0.258148	2.37283	0.421438	0.861521		1.08176e-05	0.000645972	0.861844	0.0395945
																	0.258579	0.258605	2.37277	0.421449	0.862167		1.08457e-05	0.000645972	0.86249	0.0396974
																	0.259036	0.259061	2.3727	0.42146	0.862813		1.0868e-05	0.000645972	0.863136	0.039779
																	0.259493	0.259518	2.37264	0.421471	0.863459		1.0868e-05	0.000645972	0.863782	0.039779
																	0.25995	0.259975	2.37258	0.421482	0.864105		1.0868e-05	0.000645972	0.864428	0.039779
																	0.260407	0.260432	2.37252	0.421493	0.86475		1.0868e-05	0.000645972	0.865073	0.039779
																	0.260864	0.260888	2.37246	0.421503	0.865396		1.08392e-05	0.000645972	0.865719	0.0396738
																	0.26132	0.261345	2.3724	0.421514	0.866042		1.0366e-05	0.000645977	0.866365	0.0379413
																	0.261777	0.261802	2.37234	0.421525	0.866688		1.0366e-05	0.000645977	0.867011	0.0379413
																	0.262234	0.262258	2.37228	0.421535	0.867334		1.0366e-05	0.000645977	0.867657	0.0379413
																	0.262691	0.262715	2.37222	0.421545	0.86798		1.0366e-05	0.000645977	0.868303	0.0379413
																	0.263148	0.263172	2.37217	0.421556	0.868626		1.0366e-05	0.000645977	0.868949	0.0379413
																	0.263605	0.263629	2.37211	0.421566	0.869272		1.03799e-05	0.000645977	0.869595	0.0379923
																	0.264061	0.264085	2.37205	0.421576	0.869918		1.0391e-05	0.000645977	0.870241	0.0380329
																	0.264518	0.264542	2.37199	0.421587	0.870564		1.0391e-05	0.000645977	0.870887	0.0380329
																	0.264975	0.264999	2.37193	0.421597	0.87121		1.0391e-05	0.000645977	0.871533	0.0380329
																	0.265432	0.265455	2.37187	0.421608	0.871856		1.0391e-05	0.000645977	0.872179	0.0380329
																	0.265889	0.265912	2.37182	0.421618	0.872502		1.03633e-05	0.000645977	0.872825	0.0379316
																	0.266346	0.266369	2.37176	0.421628	0.873148		9.89593e-06	0.000645982	0.873471	0.0362206
																	0.266802	0.266826	2.3717	0.421638	0.873794		9.89593e-06	0.000645982	0.874117	0.0362206
																	0.267259	0.267282	2.37165	0.421648	0.87444		9.89593e-06	0.000645982	0.874763	0.0362206
																	0.267716	0.267739	2.37159	0.421658	0.875086		9.89593e-06	0.000645982	0.875409	0.0362206
																	0.268173	0.268196	2.37153	0.421668	0.875732		9.89593e-06	0.000645982	0.876055	0.0362206
																	0.26863	0.268652	2.37148	0.421678	0.876378		9.89685e-06	0.000645982	0.876701	0.036224
																	0.269087	0.269109	2.37142	0.421688	0.877024		9.89759e-06	0.000645982	0.877347	0.0362267
																	0.269543	0.269566	2.37137	0.421698	0.87767		9.89759e-06	0.000645982	0.877993	0.0362267
																	0.27	0.270023	2.37131	0.421708	0.878316		9.89759e-06	0.000645982	0.878639	0.0362267
																	0.270457	0.270479	2.37126	0.421717	0.878962		9.89759e-06	0.000645982	0.879285	0.0362267
																	0.270914	0.270936	2.3712	0.421727	0.879608		9.87101e-06	0.000645982	0.879931	0.0361294
																	0.271371	0.271393	2.37114	0.421737	0.880254		9.4113e-06	0.000645986	0.880577	0.0344465
																	0.271827	0.27185	2.37109	0.421747	0.8809		9.4113e-06	0.000645986	0.881223	0.0344465
																	0.272284	0.272306	2.37104	0.421756	0.881546		9.4113e-06	0.000645986	0.881869	0.0344465
																	0.272741	0.272763	2.37099	0.421765	0.882192		9.4113e-06	0.000645986	0.882515	0.0344465
																	0.273198	0.27322	2.37093	0.421775	0.882838		9.4113e-06	0.000645986	0.883161	0.0344465
																	0.273655	0.273677	2.37088	0.421784	0.883484		9.40046e-06	0.000645986	0.883807	0.0344069
																	0.274112	0.274133	2.37083	0.421794	0.88413		9.39173e-06	0.000645986	0.884453	0.0343749
																	0.274568	0.27459	2.37077	0.421803	0.884776		9.39173e-06	0.000645986	0.885099	0.0343749
																	0.275025	0.275047	2.37072	0.421812	0.885422		9.39173e-06	0.000645986	0.885745	0.0343749
																	0.275482	0.275503	2.37067	0.421822	0.886068		9.39173e-06	0.000645986	0.886391	0.0343749
																	0.275939	0.27596	2.37062	0.421831	0.886714		9.36628e-06	0.000645986	0.887037	0.0342818
																	0.276396	0.276417	2.37056	0.421841	0.88736		8.91601e-06	0.000645991	0.887683	0.0326335
																	0.276853	0.276874	2.37051	0.42185	0.888006		8.91601e-06	0.000645991	0.888329	0.0326335
																	0.277309	0.27733	2.37046	0.421858	0.888652		8.91601e-06	0.000645991	0.888975	0.0326335
																	0.277766	0.277787	2.37041	0.421867	0.889298		8.91601e-06	0.00064599	0.889621	0.0326335
																	0.278223	0.278244	2.37036	0.421876	0.889944		8.916e-06	0.00064599	0.890267	0.0326335
																	0.27868	0.278701	2.37031	0.421885	0.89059		8.89469e-06	0.00064599	0.890913	0.0325555
																	0.279137	0.279157	2.37026	0.421894	0.891236		8.87745e-06	0.00064599	0.891559	0.0324924
																	0.279594	0.279614	2.37021	0.421903	0.891882		8.87745e-06	0.00064599	0.892205	0.0324924
																	0.28005	0.280071	2.37016	0.421912	0.892528		8.87745e-06	0.00064599	0.892851	0.0324924
																	0.280507	0.280528	2.37011	0.421921	0.893174		8.87745e-06	0.00064599	0.893497	0.0324924
																	0.280964	0.280984	2.37006	0.42193	0.89382		8.85316e-06	0.00064599	0.894143	0.0324035
																	0.281421	0.281441	2.37001	0.421938	0.894466		8.41396e-06	0.000645994	0.894789	0.0307957
																	0.281878	0.281898	2.36997	0.421947	0.895112		8.41396e-06	0.000645994	0.895435	0.0307957
																	0.282335	0.282355	2.36992	0.421955	0.895758		8.41395e-06	0.000645994	0.896081	0.0307957
																	0.282791	0.282811	2.36987	0.421964	0.896404		8.41395e-06	0.000645994	0.896727	0.0307957
																	0.283248	0.283268	2.36982	0.421972	0.89705		8.41395e-06	0.000645994	0.897373	0.0307957
																	0.283705	0.283725	2.36978	0.421981	0.897696		8.38347e-06	0.000645994	0.898019	0.0306842
																	0.284162	0.284181	2.36973	0.421989	0.898342		8.35871e-06	0.000645994	0.898665	0.0305936
																	0.284619	0.284638	2.36968	0.421997	0.898988		8.35871e-06	0.000645994	0.899311	0.0305936
																	0.285076	0.285095	2.36964	0.422006	0.899634		8.35871e-06	0.000645994	0.899957	0.0305936
																	0.285532	0.285552	2.36959	0.422014	0.90028		8.35871e-06	0.000645994	0.900603	0.0305936
																	0.285989	0.286008	2.36954	0.422022	0.900926		8.3356e-06	0.000645994	0.901249	0.030509
																	0.286446	0.286465	2.3695	0.422031	0.901572		7.90898e-06	0.000645998	0.901895	0.0289473
																	0.286903	0.286922	2.36945	0.422039	0.902218		7.90898e-06	0.000645998	0.902541	0.0289473
																	0.28736	0.287379	2.36941	0.422047	0.902864		7.90898e-06	0.000645998	0.903187	0.0289473
																	0.287817	0.287835	2.36936	0.422054	0.90351		7.90898e-06	0.000645998	0.903833	0.0289473
																	0.288273	0.288292	2.36932	0.422062	0.904156		7.90898e-06	0.000645998	0.904479	0.0289473
																	0.28873	0.288749	2.36927	0.42207	0.904802		7.87063e-06	0.000645998	0.905125	0.028807
																	0.289187	0.289206	2.36923	0.422078	0.905448		7.83937e-06	0.000645998	0.905771	0.0286926
																	0.289644	0.289662	2.36919	0.422086	0.906094		7.83937e-06	0.000645997	0.906417	0.0286926
																	0.290101	0.290119	2.36914	0.422094	0.90674		7.83937e-06	0.000645997	0.907063	0.0286926
																	0.290558	0.290576	2.3691	0.422102	0.907386		7.83937e-06	0.000645997	0.907709	0.0286926
																	0.291014	0.291033	2.36905	0.422109	0.908032		7.81747e-06	0.000645997	0.908355	0.0286124
																	0.291471	0.291489	2.36901	0.422117	0.908678		7.40479e-06	0.000646001	0.909001	0.0271018
																	0.291928	0.291946	2.36897	0.422125	0.909324		7.40479e-06	0.000646001	0.909647	0.0271018
																	0.292385	0.292403	2.36893	0.422132	0.90997		7.40479e-06	0.000646001	0.910293	0.0271018
																	0.292842	0.29286	2.36889	0.422139	0.910616		7.40479e-06	0.000646001	0.910939	0.0271018
																	0.293298	0.293316	2.36884	0.422147	0.911262		7.40478e-06	0.000646001	0.911585	0.0271018
																	0.293755	0.293773	2.3688	0.422154	0.911908		7.35988e-06	0.000646001	0.912231	0.0269375
																	0.294212	0.29423	2.36876	0.422162	0.912554		7.32313e-06	0.000646001	0.912877	0.026803
																	0.294669	0.294687	2.36872	0.422169	0.9132		7.32313e-06	0.000646001	0.913523	0.026803
																	0.295126	0.295143	2.36868	0.422176	0.913846		7.32313e-06	0.000646001	0.914169	0.026803
																	0.295583	0.2956	2.36864	0.422184	0.914492		7.32313e-06	0.000646	0.914815	0.026803
																	0.296039	0.296057	2.3686	0.422191	0.915138		7.30243e-06	0.000646	0.915461	0.0267272
																	0.296496	0.296514	2.36856	0.422198	0.915784		6.90491e-06	0.000646004	0.916107	0.0252721
																	0.296953	0.29697	2.36852	0.422205	0.91643		6.90491e-06	0.000646004	0.916753	0.0252721
																	0.29741	0.297427	2.36848	0.422212	0.917076		6.90491e-06	0.000646004	0.917399	0.0252721
																	0.297867	0.297884	2.36844	0.422219	0.917722		6.90491e-06	0.000646004	0.918045	0.0252721
																	0.298324	0.298341	2.3684	0.422226	0.918368		6.9049e-06	0.000646004	0.918691	0.0252721
																	0.29878	0.298798	2.36836	0.422233	0.919014		6.85469e-06	0.000646004	0.919337	0.0250884
																	0.299237	0.299254	2.36832	0.42224	0.91966		6.81345e-06	0.000646004	0.919983	0.0249374
																	0.299694	0.299711	2.36829	0.422246	0.920306		6.81345e-06	0.000646004	0.920629	0.0249374
																	0.300151	0.300168	2.36825	0.422253	0.920952		6.81345e-06	0.000646003	0.921275	0.0249374
																	0.300608	0.300625	2.36821	0.42226	0.921598		6.81345e-06	0.000646003	0.921921	0.0249374
																	0.301065	0.301081	2.36817	0.422267	0.922244		6.79396e-06	0.000646003	0.922567	0.0248661
																	0.301521	0.301538	2.36813	0.422274	0.92289		6.41264e-06	0.000646007	0.923213	0.0234703
																	0.301978	0.301995	2.3681	0.42228	0.923536		6.41264e-06	0.000646007	0.923859	0.0234703
																	0.302435	0.302452	2.36806	0.422287	0.924182		6.41264e-06	0.000646007	0.924505	0.0234703
																	0.302892	0.302908	2.36802	0.422293	0.924828		6.41264e-06	0.000646007	0.925151	0.0234703
																	0.303349	0.303365	2.36799	0.422299	0.925474		6.41264e-06	0.000646007	0.925797	0.0234703
																	0.303806	0.303822	2.36795	0.422306	0.92612		6.35832e-06	0.000646006	0.926443	0.0232715
																	0.304262	0.304279	2.36792	0.422312	0.926766		6.31356e-06	0.000646006	0.927089	0.0231077
																	0.304719	0.304735	2.36788	0.422318	0.927412		6.31356e-06	0.000646006	0.927735	0.0231077
																	0.305176	0.305192	2.36785	0.422325	0.928058		6.31356e-06	0.000646006	0.928381	0.0231077
																	0.305633	0.305649	2.36781	0.422331	0.928704		6.31356e-06	0.000646006	0.929027	0.0231077
																	0.30609	0.306106	2.36778	0.422337	0.92935		6.29527e-06	0.000646006	0.929673	0.0230408
																	0.306547	0.306562	2.36774	0.422344	0.929996		5.93103e-06	0.00064601	0.930319	0.0217075
																	0.307003	0.307019	2.36771	0.42235	0.930642		5.93103e-06	0.00064601	0.930965	0.0217075
																	0.30746	0.307476	2.36767	0.422356	0.931288		5.93103e-06	0.000646009	0.931611	0.0217075
																	0.307917	0.307933	2.36764	0.422361	0.931934		5.93103e-06	0.000646009	0.932257	0.0217075
																	0.308374	0.30839	2.36761	0.422367	0.93258		5.93103e-06	0.000646009	0.932903	0.0217075
																	0.308831	0.308846	2.36757	0.422373	0.933226		5.87375e-06	0.000646009	0.933549	0.0214979
																	0.309288	0.309303	2.36754	0.422379	0.933872		5.82639e-06	0.000646009	0.934195	0.0213246
																	0.309744	0.30976	2.36751	0.422385	0.934518		5.82639e-06	0.000646009	0.934841	0.0213246
																	0.310201	0.310217	2.36748	0.422391	0.935164		5.82639e-06	0.000646009	0.935487	0.0213246
																	0.310658	0.310673	2.36744	0.422397	0.93581		5.82638e-06	0.000646008	0.936133	0.0213246
																	0.311115	0.31113	2.36741	0.422402	0.936456		5.80929e-06	0.000646008	0.936779	0.021262
																	0.311572	0.311587	2.36738	0.422408	0.937102		5.46282e-06	0.000646012	0.937425	0.0199938
																	0.312028	0.312044	2.36735	0.422414	0.937748		5.46282e-06	0.000646012	0.938071	0.0199938
																	0.312485	0.3125	2.36732	0.422419	0.938394		5.46282e-06	0.000646012	0.938717	0.0199938
																	0.312942	0.312957	2.36729	0.422425	0.93904		5.46282e-06	0.000646012	0.939363	0.0199938
																	0.313399	0.313414	2.36726	0.42243	0.939686		5.46282e-06	0.000646011	0.940009	0.0199938
																	0.313856	0.313871	2.36722	0.422436	0.940332		5.40363e-06	0.000646011	0.940655	0.0197772
																	0.314313	0.314327	2.36719	0.422441	0.940978		5.35454e-06	0.000646011	0.941301	0.0195975
																	0.314769	0.314784	2.36716	0.422446	0.941624		5.35454e-06	0.000646011	0.941947	0.0195975
																	0.315226	0.315241	2.36713	0.422452	0.94227		5.35454e-06	0.000646011	0.942593	0.0195975
																	0.315683	0.315698	2.3671	0.422457	0.942916		5.35453e-06	0.000646011	0.943239	0.0195975
																	0.31614	0.316155	2.36707	0.422462	0.943562		5.33861e-06	0.00064601	0.943885	0.0195392
																	0.316597	0.316611	2.36704	0.422468	0.944208		5.01044e-06	0.000646014	0.944531	0.018338
																	0.317054	0.317068	2.36702	0.422473	0.944854		5.01044e-06	0.000646014	0.945177	0.018338
																	0.31751	0.317525	2.36699	0.422478	0.9455		5.01043e-06	0.000646014	0.945823	0.018338
																	0.317967	0.317982	2.36696	0.422483	0.946146		5.01043e-06	0.000646014	0.946469	0.018338
																	0.318424	0.318438	2.36693	0.422488	0.946792		5.01043e-06	0.000646014	0.947115	0.018338
																	0.318881	0.318895	2.3669	0.422493	0.947438		4.9503e-06	0.000646013	0.947761	0.018118
																	0.319338	0.319352	2.36688	0.422498	0.948084		4.90028e-06	0.000646013	0.948407	0.0179349
																	0.319795	0.319809	2.36685	0.422503	0.94873		4.90028e-06	0.000646013	0.949053	0.0179349
																	0.320251	0.320265	2.36682	0.422508	0.949376		4.90028e-06	0.000646013	0.949699	0.0179349
																	0.320708	0.320722	2.36679	0.422512	0.950022		4.90028e-06	0.000646013	0.950345	0.0179349
																	0.321165	0.321179	2.36677	0.422517	0.950668		4.8855e-06	0.000646013	0.950991	0.0178808
																	0.321622	0.321636	2.36674	0.422522	0.951314		4.57597e-06	0.000646016	0.951637	0.0167478
																	0.322079	0.322093	2.36671	0.422527	0.95196		4.57597e-06	0.000646016	0.952283	0.0167478
																	0.322536	0.322549	2.36669	0.422531	0.952606		4.57596e-06	0.000646016	0.952929	0.0167478
																	0.322992	0.323006	2.36666	0.422536	0.953252		4.57596e-06	0.000646016	0.953575	0.0167478
																	0.323449	0.323463	2.36664	0.422541	0.953898		4.57596e-06	0.000646015	0.954221	0.0167478
																	0.323906	0.32392	2.36661	0.422545	0.954544		4.51576e-06	0.000646015	0.954867	0.0165275
																	0.324363	0.324376	2.36659	0.42255	0.95519		4.46555e-06	0.000646015	0.955513	0.0163437
																	0.32482	0.324833	2.36656	0.422554	0.955836		4.46555e-06	0.000646015	0.956159	0.0163437
																	0.325277	0.32529	2.36654	0.422559	0.956482		4.46554e-06	0.000646015	0.956805	0.0163437
																	0.325733	0.325747	2.36651	0.422563	0.957128		4.46554e-06	0.000646015	0.957451	0.0163437
																	0.32619	0.326204	2.36649	0.422568	0.957774		4.45187e-06	0.000646014	0.958097	0.0162937
																	0.326647	0.32666	2.36646	0.422572	0.95842		4.16116e-06	0.000646018	0.958743	0.0152296
																	0.327104	0.327117	2.36644	0.422576	0.959066		4.16116e-06	0.000646018	0.959389	0.0152296
																	0.327561	0.327574	2.36641	0.42258	0.959712		4.16116e-06	0.000646018	0.960035	0.0152296
																	0.328018	0.328031	2.36639	0.422584	0.960358		4.16115e-06	0.000646017	0.960681	0.0152296
																	0.328474	0.328487	2.36637	0.422589	0.961004		4.16115e-06	0.000646017	0.961327	0.0152296
																	0.328931	0.328944	2.36634	0.422593	0.96165		4.10165e-06	0.000646017	0.961973	0.0150118
																	0.329388	0.329401	2.36632	0.422597	0.962296		4.05189e-06	0.000646017	0.962619	0.0148297
																	0.329845	0.329858	2.3663	0.422601	0.962942		4.05189e-06	0.000646017	0.963265	0.0148297
																	0.330302	0.330315	2.36628	0.422605	0.963588		4.05189e-06	0.000646016	0.963911	0.0148297
																	0.330759	0.330771	2.36625	0.422609	0.964234		4.05189e-06	0.000646016	0.964557	0.0148297
																	0.331215	0.331228	2.36623	0.422613	0.96488		4.03929e-06	0.000646016	0.965203	0.0147836
																	0.331672	0.331685	2.36621	0.422617	0.965526		3.76741e-06	0.00064602	0.965849	0.0137885
																	0.332129	0.332142	2.36619	0.422621	0.966173		3.76741e-06	0.000646019	0.966496	0.0137885
																	0.332586	0.332598	2.36617	0.422625	0.966819		3.76741e-06	0.000646019	0.967142	0.0137885
																	0.333043	0.333055	2.36614	0.422628	0.967465		3.76741e-06	0.000646019	0.967788	0.0137885
																	0.333499	0.333512	2.36612	0.422632	0.968111		3.7674e-06	0.000646019	0.968434	0.0137885
																	0.333956	0.333969	2.3661	0.422636	0.968757		3.70927e-06	0.000646019	0.96908	0.0135757
																	0.334413	0.334426	2.36608	0.42264	0.969403		3.66054e-06	0.000646018	0.969726	0.0133974
																	0.33487	0.334882	2.36606	0.422643	0.970049		3.66054e-06	0.000646018	0.970372	0.0133974
																	0.335327	0.335339	2.36604	0.422647	0.970695		3.66054e-06	0.000646018	0.971018	0.0133974
																	0.335784	0.335796	2.36602	0.422651	0.971341		3.66054e-06	0.000646018	0.971664	0.0133974
																	0.33624	0.336253	2.366	0.422654	0.971987		3.64898e-06	0.000646018	0.97231	0.0133551
																	0.336697	0.336709	2.36598	0.422658	0.972633		3.39578e-06	0.000646021	0.972956	0.0124283
																	0.337154	0.337166	2.36596	0.422661	0.973279		3.39578e-06	0.000646021	0.973602	0.0124283
																	0.337611	0.337623	2.36594	0.422665	0.973925		3.39578e-06	0.000646021	0.974248	0.0124283
																	0.338068	0.33808	2.36592	0.422668	0.974571		3.39577e-06	0.00064602	0.974894	0.0124283
																	0.338525	0.338537	2.3659	0.422672	0.975217		3.39577e-06	0.00064602	0.97554	0.0124283
																	0.338981	0.338993	2.36588	0.422675	0.975863		3.33958e-06	0.00064602	0.976186	0.0122227
																	0.339438	0.33945	2.36587	0.422678	0.976509		3.29236e-06	0.00064602	0.976832	0.0120498
																	0.339895	0.339907	2.36585	0.422682	0.977155		3.29236e-06	0.00064602	0.977478	0.0120498
																	0.340352	0.340364	2.36583	0.422685	0.977801		3.29236e-06	0.00064602	0.978124	0.0120498
																	0.340809	0.34082	2.36581	0.422688	0.978447		3.29236e-06	0.000646019	0.97877	0.0120498
																	0.341266	0.341277	2.36579	0.422691	0.979093		3.28179e-06	0.000646019	0.979416	0.0120111
																	0.341722	0.341734	2.36577	0.422695	0.979739		3.047e-06	0.000646022	0.980062	0.0111518
																	0.342179	0.342191	2.36576	0.422698	0.980385		3.047e-06	0.000646022	0.980708	0.0111518
																	0.342636	0.342648	2.36574	0.422701	0.981031		3.04699e-06	0.000646022	0.981354	0.0111518
																	0.343093	0.343104	2.36572	0.422704	0.981677		3.04699e-06	0.000646022	0.982	0.0111518
																	0.34355	0.343561	2.36571	0.422707	0.982323		3.04699e-06	0.000646022	0.982646	0.0111518
																	0.344007	0.344018	2.36569	0.42271	0.982969		2.99321e-06	0.000646021	0.983292	0.0109549
																	0.344463	0.344475	2.36567	0.422713	0.983615		2.94791e-06	0.000646021	0.983938	0.0107891
																	0.34492	0.344931	2.36565	0.422716	0.984261		2.94791e-06	0.000646021	0.984584	0.0107891
																	0.345377	0.345388	2.36564	0.422719	0.984907		2.9479e-06	0.000646021	0.98523	0.0107891
																	0.345834	0.345845	2.36562	0.422722	0.985553		2.9479e-06	0.000646021	0.985876	0.0107891
																	0.346291	0.346302	2.36561	0.422725	0.986199		2.93828e-06	0.00064602	0.986522	0.0107539
																	0.346748	0.346759	2.36559	0.422728	0.986845		2.72148e-06	0.000646024	0.987168	0.00996038
																	0.347204	0.347215	2.36557	0.42273	0.987491		2.72148e-06	0.000646023	0.987814	0.00996038
																	0.347661	0.347672	2.36556	0.422733	0.988137		2.72148e-06	0.000646023	0.98846	0.00996038
																	0.348118	0.348129	2.36554	0.422736	0.988783		2.72148e-06	0.000646023	0.989106	0.00996038
																	0.348575	0.348586	2.36553	0.422739	0.989429		2.72148e-06	0.000646023	0.989752	0.00996038
																	0.349032	0.349043	2.36551	0.422741	0.990075		2.67048e-06	0.000646023	0.990398	0.00977373
																	0.349489	0.349499	2.3655	0.422744	0.990721		2.62742e-06	0.000646022	0.991044	0.00961615
																	0.349945	0.349956	2.36548	0.422747	0.991367		2.62742e-06	0.000646022	0.99169	0.00961615
																	0.350402	0.350413	2.36547	0.422749	0.992013		2.62742e-06	0.000646022	0.992336	0.00961615
																	0.350859	0.35087	2.36545	0.422752	0.992659		2.62742e-06	0.000646022	0.992982	0.00961615
																	0.351316	0.351326	2.36544	0.422754	0.993305		2.61869e-06	0.000646022	0.993628	0.0095842
																	0.351773	0.351783	2.36542	0.422757	0.993951		2.41936e-06	0.000646025	0.994274	0.00885462
																	0.35223	0.35224	2.36541	0.42276	0.994597		2.41935e-06	0.000646025	0.99492	0.00885462
																	0.352686	0.352697	2.3654	0.422762	0.995243		2.41935e-06	0.000646024	0.995566	0.00885462
																	0.353143	0.353154	2.36538	0.422764	0.995889		2.41935e-06	0.000646024	0.996212	0.00885462
																	0.3536	0.35361	2.36537	0.422767	0.996535		2.41935e-06	0.000646024	0.996859	0.00885462
																	0.354057	0.354067	2.36536	0.422769	0.997182		2.37142e-06	0.000646024	0.997505	0.00867919
																	0.354514	0.354524	2.36534	0.422772	0.997828		2.33087e-06	0.000646024	0.998151	0.00853077
																	0.35497	0.354981	2.36533	0.422774	0.998474		2.33087e-06	0.000646023	0.998797	0.00853077
																	0.355427	0.355438	2.36532	0.422776	0.99912		2.33087e-06	0.000646023	0.999443	0.00853077
																	0.355884	0.355894	2.3653	0.422779	0.999766		2.33086e-06	0.000646023	1.00009	0.00853077
																	0.356341	0.356351	2.36529	0.422781	1.00041		2.32298e-06	0.000646023	1.00073	0.0085019
																	0.356798	0.356808	2.36528	0.422783	1.00106		2.14048e-06	0.000646026	1.00138	0.00783395
																	0.357255	0.357265	2.36527	0.422785	1.0017		2.14048e-06	0.000646025	1.00203	0.00783395
																	0.357711	0.357721	2.36525	0.422787	1.00235		2.14048e-06	0.000646025	1.00267	0.00783395
																	0.358168	0.358178	2.36524	0.42279	1.003		2.14048e-06	0.000646025	1.00332	0.00783395
																	0.358625	0.358635	2.36523	0.422792	1.00364		2.14048e-06	0.000646025	1.00396	0.00783395
																	0.359082	0.359092	2.36522	0.422794	1.00429		2.09582e-06	0.000646025	1.00461	0.00767049
																	0.359539	0.359549	2.36521	0.422796	1.00493		2.05795e-06	0.000646024	1.00526	0.00753191
																	0.359996	0.360005	2.3652	0.422798	1.00558		2.05795e-06	0.000646024	1.0059	0.00753191
																	0.360452	0.360462	2.36518	0.4228	1.00623		2.05795e-06	0.000646024	1.00655	0.00753191
																	0.360909	0.360919	2.36517	0.422802	1.00687		2.05795e-06	0.000646024	1.00719	0.00753191
																	0.361366	0.361376	2.36516	0.422804	1.00752		2.05085e-06	0.000646024	1.00784	0.00750593
																	0.361823	0.361833	2.36515	0.422806	1.00816		1.88447e-06	0.000646027	1.00849	0.00689697
																	0.36228	0.362289	2.36514	0.422808	1.00881		1.88447e-06	0.000646026	1.00913	0.00689697
																	0.362737	0.362746	2.36513	0.42281	1.00946		1.88447e-06	0.000646026	1.00978	0.00689697
																	0.363193	0.363203	2.36512	0.422812	1.0101		1.88447e-06	0.000646026	1.01043	0.00689697
																	0.36365	0.36366	2.36511	0.422814	1.01075		1.88447e-06	0.000646026	1.01107	0.00689697
																	0.364107	0.364116	2.3651	0.422816	1.01139		1.84321e-06	0.000646026	1.01172	0.00674596
																	0.364564	0.364573	2.36509	0.422818	1.01204		1.80816e-06	0.000646025	1.01236	0.00661768
																	0.365021	0.36503	2.36508	0.422819	1.01269		1.80816e-06	0.000646025	1.01301	0.00661768
																	0.365478	0.365487	2.36507	0.422821	1.01333		1.80815e-06	0.000646025	1.01366	0.00661768
																	0.365934	0.365944	2.36506	0.422823	1.01398		1.80815e-06	0.000646025	1.0143	0.00661768
																	0.366391	0.3664	2.36505	0.422825	1.01462		1.80179e-06	0.000646024	1.01495	0.00659439
																	0.366848	0.366857	2.36504	0.422827	1.01527		1.65073e-06	0.000646027	1.01559	0.0060415
																	0.367305	0.367314	2.36503	0.422828	1.01592		1.65073e-06	0.000646027	1.01624	0.0060415
																	0.367762	0.367771	2.36502	0.42283	1.01656		1.65073e-06	0.000646027	1.01689	0.0060415
																	0.368219	0.368228	2.36501	0.422832	1.01721		1.65073e-06	0.000646027	1.01753	0.0060415
																	0.368675	0.368684	2.365	0.422833	1.01785		1.65073e-06	0.000646026	1.01818	0.0060415
																	0.369132	0.369141	2.36499	0.422835	1.0185		1.61294e-06	0.000646026	1.01882	0.00590318
																	0.369589	0.369598	2.36498	0.422836	1.01915		1.58076e-06	0.000646026	1.01947	0.00578544
																	0.370046	0.370055	2.36497	0.422838	1.01979		1.58076e-06	0.000646026	1.02012	0.00578544
																	0.370503	0.370512	2.36496	0.42284	1.02044		1.58076e-06	0.000646026	1.02076	0.00578544
																	0.37096	0.370968	2.36495	0.422841	1.02108		1.58076e-06	0.000646025	1.02141	0.00578544
																	0.371416	0.371425	2.36495	0.422843	1.02173		1.57508e-06	0.000646025	1.02205	0.00576464
																	0.371873	0.371882	2.36494	0.422844	1.02238		1.43848e-06	0.000646028	1.0227	0.00526468
																	0.37233	0.372339	2.36493	0.422846	1.02302		1.43848e-06	0.000646028	1.02335	0.00526468
																	0.372787	0.372795	2.36492	0.422847	1.02367		1.43848e-06	0.000646027	1.02399	0.00526468
																	0.373244	0.373252	2.36491	0.422849	1.02431		1.43848e-06	0.000646027	1.02464	0.00526468
																	0.3737	0.373709	2.3649	0.42285	1.02496		1.43848e-06	0.000646027	1.02528	0.00526468
																	0.374157	0.374166	2.3649	0.422852	1.02561		1.40416e-06	0.000646027	1.02593	0.00513909
																	0.374614	0.374623	2.36489	0.422853	1.02625		1.3749e-06	0.000646027	1.02658	0.00503198
																	0.375071	0.375079	2.36488	0.422854	1.0269		1.3749e-06	0.000646026	1.02722	0.00503198
																	0.375528	0.375536	2.36487	0.422856	1.02754		1.3749e-06	0.000646026	1.02787	0.00503198
																	0.375985	0.375993	2.36487	0.422857	1.02819		1.3749e-06	0.000646026	1.02851	0.00503198
																	0.376441	0.37645	2.36486	0.422858	1.02884		1.36984e-06	0.000646026	1.02916	0.00501347
																	0.376898	0.376907	2.36485	0.42286	1.02948		1.24677e-06	0.000646028	1.02981	0.00456303
																	0.377355	0.377363	2.36484	0.422861	1.03013		1.24677e-06	0.000646028	1.03045	0.00456303
																	0.377812	0.37782	2.36484	0.422862	1.03077		1.24677e-06	0.000646028	1.0311	0.00456303
																	0.378269	0.378277	2.36483	0.422864	1.03142		1.24677e-06	0.000646028	1.03174	0.00456303
																	0.378726	0.378734	2.36482	0.422865	1.03207		1.24677e-06	0.000646027	1.03239	0.00456303
																	0.379182	0.379191	2.36481	0.422866	1.03271		1.2159e-06	0.000646027	1.03304	0.00445007
																	0.379639	0.379647	2.36481	0.422867	1.03336		1.18953e-06	0.000646027	1.03368	0.00435355
																	0.380096	0.380104	2.3648	0.422868	1.034		1.18953e-06	0.000646027	1.03433	0.00435355
																	0.380553	0.380561	2.36479	0.42287	1.03465		1.18953e-06	0.000646026	1.03497	0.00435355
																	0.38101	0.381018	2.36479	0.422871	1.0353		1.18953e-06	0.000646026	1.03562	0.00435355
																	0.381467	0.381475	2.36478	0.422872	1.03594		1.18504e-06	0.000646026	1.03627	0.00433713
																	0.381923	0.381931	2.36477	0.422873	1.03659		1.0745e-06	0.000646029	1.03691	0.00393256
																	0.38238	0.382388	2.36477	0.422874	1.03724		1.0745e-06	0.000646028	1.03756	0.00393256
																	0.382837	0.382845	2.36476	0.422875	1.03788		1.0745e-06	0.000646028	1.0382	0.00393256
																	0.383294	0.383302	2.36476	0.422876	1.03853		1.0745e-06	0.000646028	1.03885	0.00393256
																	0.383751	0.383758	2.36475	0.422878	1.03917		1.0745e-06	0.000646028	1.0395	0.00393256
																	0.384208	0.384215	2.36474	0.422879	1.03982		1.04703e-06	0.000646027	1.04014	0.00383202
																	0.384664	0.384672	2.36474	0.42288	1.04047		1.02351e-06	0.000646027	1.04079	0.00374595
																	0.385121	0.385129	2.36473	0.422881	1.04111		1.02351e-06	0.000646027	1.04143	0.00374595
																	0.385578	0.385586	2.36473	0.422882	1.04176		1.02351e-06	0.000646027	1.04208	0.00374595
																	0.386035	0.386042	2.36472	0.422883	1.0424		1.02351e-06	0.000646026	1.04273	0.00374595
																	0.386492	0.386499	2.36472	0.422884	1.04305		1.01954e-06	0.000646026	1.04337	0.00373141
																	0.386949	0.386956	2.36471	0.422885	1.0437		9.20409e-07	0.000646028	1.04402	0.00336859
																	0.387405	0.387413	2.36471	0.422886	1.04434		9.20408e-07	0.000646028	1.04466	0.00336859
																	0.387862	0.38787	2.3647	0.422887	1.04499		9.20408e-07	0.000646028	1.04531	0.00336859
																	0.388319	0.388326	2.3647	0.422888	1.04563		9.20408e-07	0.000646028	1.04596	0.00336859
																	0.388776	0.388783	2.36469	0.422888	1.04628		9.20407e-07	0.000646027	1.0466	0.00336859
																	0.389233	0.38924	2.36468	0.422889	1.04693		8.96274e-07	0.000646027	1.04725	0.00328027
																	0.38969	0.389697	2.36468	0.42289	1.04757		8.75576e-07	0.000646027	1.04789	0.00320452
																	0.390146	0.390154	2.36467	0.422891	1.04822		8.75576e-07	0.000646027	1.04854	0.00320452
																	0.390603	0.39061	2.36467	0.422892	1.04886		8.75575e-07	0.000646026	1.04919	0.00320452
																	0.39106	0.391067	2.36467	0.422893	1.04951		8.75575e-07	0.000646026	1.04983	0.00320452
																	0.391517	0.391524	2.36466	0.422894	1.05016		8.72045e-07	0.000646026	1.05048	0.0031916
																	0.391974	0.391981	2.36466	0.422895	1.0508		7.82846e-07	0.000646026	1.05112	0.00286514
																	0.392431	0.392437	2.36465	0.422895	1.05145		7.82846e-07	0.000646026	1.05177	0.00286514
																	0.392887	0.392894	2.36465	0.422896	1.05209		7.82846e-07	0.000646026	1.05242	0.00286514
																	0.393344	0.393351	2.36464	0.422897	1.05274		7.82845e-07	0.000646026	1.05306	0.00286514
																	0.393801	0.393808	2.36464	0.422898	1.05339		7.82845e-07	0.000646025	1.05371	0.00286514
																	0.394258	0.394265	2.36463	0.422899	1.05403		7.62045e-07	0.000646025	1.05435	0.00278901
																	0.394715	0.394721	2.36463	0.422899	1.05468		7.4417e-07	0.000646025	1.055	0.00272359
																	0.395171	0.395178	2.36462	0.4229	1.05532		7.4417e-07	0.000646025	1.05565	0.00272359
																	0.395628	0.395635	2.36462	0.422901	1.05597		7.44169e-07	0.000646024	1.05629	0.00272359
																	0.396085	0.396092	2.36462	0.422902	1.05662		7.44169e-07	0.000646024	1.05694	0.00272359
																	0.396542	0.396549	2.36461	0.422902	1.05726		7.40924e-07	0.000646024	1.05758	0.00271172
																	0.396999	0.397005	2.36461	0.422903	1.05791		6.57411e-07	0.000645652	1.05823	0.00240745
																	0.397456	0.397462	2.3646	0.422904	1.05855		6.57407e-07	0.000645648	1.05888	0.00240745
																	0.397912	0.397918	2.3646	0.422904	1.0592		6.57403e-07	0.000645645	1.05952	0.00240745
																	0.398369	0.398374	2.3646	0.422905	1.05984		6.57399e-07	0.000645641	1.06017	0.00240745
																	0.398826	0.39883	2.36459	0.422906	1.06049		6.57395e-07	0.000645637	1.06081	0.00240745
																	0.399283	0.399287	2.36459	0.422906	1.06114		6.40232e-07	0.000645633	1.06146	0.00234461
																	0.39974	0.399743	2.36459	0.422907	1.06178		6.25259e-07	0.000645629	1.0621	0.00228979
																	0.400197	0.400199	2.36458	0.422908	1.06243		6.25255e-07	0.000645625	1.06275	0.00228979
																	0.400653	0.400655	2.36458	0.422908	1.06307		6.2525e-07	0.00064562	1.0634	0.00228979
																	0.40111	0.401112	2.36458	0.422909	1.06372		6.25246e-07	0.000645615	1.06404	0.00228979
																	0.401567	0.401568	2.36457	0.422909	1.06436		6.06241e-07	0.000645609	1.06469	0.00222021
																	0.402024	0.402024	2.36457	0.42291	1.06501		0	1.96181e-05	1.06502	0
																	0.40201	0.40201	2.36457	0.42291	1.06503
[truncated: 36 more columns]

## Sheet: Cond_matrix
																				0.42291	0.422907	0.422903	0.422898	0.422893	0.422888	0.422882	0.422875	0.422867	0.422858	0.422848	0.422838	0.422825	0.422812	0.422797	0.42278	0.422762	0.422741	0.422718	0.422693	0.422664	0.422633	0.422598	0.42256	0.422518	0.422471	0.42242	0.422363	0.4223	0.422231
																				0.422907	0.422903	0.422899	0.422894	0.422889	0.422883	0.422877	0.42287	0.422862	0.422853	0.422843	0.422832	0.42282	0.422807	0.422792	0.422775	0.422757	0.422736	0.422714	0.422689	0.422661	0.422631	0.422597	0.42256	0.422519	0.422474	0.422425	0.42237	0.42231	0.422244
																				0.422903	0.422899	0.422895	0.42289	0.422884	0.422878	0.422872	0.422864	0.422856	0.422847	0.422837	0.422826	0.422814	0.4228	0.422785	0.422768	0.422749	0.422729	0.422707	0.422682	0.422654	0.422624	0.422591	0.422554	0.422514	0.42247	0.422421	0.422368	0.42231	0.422245
																				0.422898	0.422894	0.42289	0.422885	0.422879	0.422873	0.422866	0.422858	0.42285	0.42284	0.42283	0.422819	0.422806	0.422792	0.422777	0.42276	0.422741	0.42272	0.422698	0.422673	0.422645	0.422615	0.422582	0.422546	0.422506	0.422462	0.422414	0.422362	0.422304	0.422241
																				0.422893	0.422889	0.422884	0.422879	0.422873	0.422867	0.422859	0.422851	0.422843	0.422833	0.422822	0.42281	0.422797	0.422783	0.422767	0.42275	0.422731	0.42271	0.422687	0.422662	0.422635	0.422605	0.422571	0.422535	0.422495	0.422452	0.422405	0.422353	0.422296	0.422234
																				0.422888	0.422883	0.422878	0.422873	0.422867	0.42286	0.422852	0.422844	0.422835	0.422825	0.422814	0.422801	0.422788	0.422773	0.422757	0.42274	0.42272	0.422699	0.422676	0.422651	0.422623	0.422592	0.422559	0.422523	0.422483	0.42244	0.422393	0.422341	0.422285	0.422223
																				0.422882	0.422877	0.422872	0.422866	0.422859	0.422852	0.422844	0.422836	0.422826	0.422816	0.422804	0.422792	0.422778	0.422763	0.422746	0.422728	0.422708	0.422687	0.422663	0.422638	0.42261	0.422579	0.422545	0.422509	0.422469	0.422426	0.422379	0.422327	0.422271	0.422211
																				0.422875	0.42287	0.422864	0.422858	0.422851	0.422844	0.422836	0.422827	0.422817	0.422806	0.422794	0.422781	0.422767	0.422751	0.422734	0.422716	0.422695	0.422674	0.42265	0.422623	0.422595	0.422564	0.42253	0.422494	0.422454	0.42241	0.422363	0.422312	0.422256	0.422196
																				0.422867	0.422862	0.422856	0.42285	0.422843	0.422835	0.422826	0.422817	0.422806	0.422795	0.422783	0.422769	0.422754	0.422738	0.422721	0.422702	0.422681	0.422659	0.422635	0.422608	0.422579	0.422548	0.422514	0.422477	0.422437	0.422393	0.422346	0.422295	0.422239	0.422179
																				0.422858	0.422853	0.422847	0.42284	0.422833	0.422825	0.422816	0.422806	0.422795	0.422783	0.42277	0.422756	0.422741	0.422725	0.422707	0.422687	0.422666	0.422643	0.422618	0.422591	0.422562	0.42253	0.422496	0.422459	0.422418	0.422375	0.422327	0.422276	0.422221	0.422161
																				0.422848	0.422843	0.422837	0.42283	0.422822	0.422814	0.422804	0.422794	0.422783	0.42277	0.422757	0.422743	0.422727	0.42271	0.422691	0.422671	0.42265	0.422626	0.422601	0.422573	0.422544	0.422511	0.422477	0.422439	0.422398	0.422354	0.422307	0.422256	0.4222	0.42214
																				0.422838	0.422832	0.422826	0.422819	0.42281	0.422801	0.422792	0.422781	0.422769	0.422756	0.422743	0.422728	0.422711	0.422694	0.422675	0.422654	0.422632	0.422608	0.422582	0.422554	0.422524	0.422491	0.422456	0.422418	0.422377	0.422333	0.422285	0.422233	0.422178	0.422118
																				0.422825	0.42282	0.422814	0.422806	0.422797	0.422788	0.422778	0.422767	0.422754	0.422741	0.422727	0.422711	0.422695	0.422676	0.422657	0.422636	0.422613	0.422588	0.422562	0.422533	0.422503	0.422469	0.422434	0.422395	0.422354	0.422309	0.422261	0.42221	0.422154	0.422095
																				0.422812	0.422807	0.4228	0.422792	0.422783	0.422773	0.422763	0.422751	0.422738	0.422725	0.42271	0.422694	0.422676	0.422658	0.422638	0.422616	0.422593	0.422567	0.42254	0.422511	0.42248	0.422446	0.42241	0.422371	0.422329	0.422284	0.422236	0.422184	0.422129	0.422069
																				0.422797	0.422792	0.422785	0.422777	0.422767	0.422757	0.422746	0.422734	0.422721	0.422707	0.422691	0.422675	0.422657	0.422638	0.422617	0.422595	0.422571	0.422545	0.422517	0.422488	0.422456	0.422422	0.422385	0.422345	0.422303	0.422258	0.422209	0.422157	0.422102	0.422042
																				0.42278	0.422775	0.422768	0.42276	0.42275	0.42274	0.422728	0.422716	0.422702	0.422687	0.422671	0.422654	0.422636	0.422616	0.422595	0.422572	0.422547	0.422521	0.422493	0.422462	0.42243	0.422395	0.422358	0.422318	0.422275	0.42223	0.422181	0.422129	0.422073	0.422013
																				0.422762	0.422757	0.422749	0.422741	0.422731	0.42272	0.422708	0.422695	0.422681	0.422666	0.42265	0.422632	0.422613	0.422593	0.422571	0.422547	0.422522	0.422495	0.422466	0.422435	0.422402	0.422367	0.422329	0.422289	0.422246	0.4222	0.422151	0.422098	0.422042	0.421982
																				0.422741	0.422736	0.422729	0.42272	0.42271	0.422699	0.422687	0.422674	0.422659	0.422643	0.422626	0.422608	0.422588	0.422567	0.422545	0.422521	0.422495	0.422468	0.422438	0.422407	0.422373	0.422337	0.422299	0.422258	0.422214	0.422168	0.422119	0.422066	0.422009	0.42195
																				0.422718	0.422714	0.422707	0.422698	0.422687	0.422676	0.422663	0.42265	0.422635	0.422618	0.422601	0.422582	0.422562	0.42254	0.422517	0.422493	0.422466	0.422438	0.422408	0.422376	0.422342	0.422305	0.422267	0.422225	0.422181	0.422134	0.422085	0.422032	0.421975	0.421915
																				0.422693	0.422689	0.422682	0.422673	0.422662	0.422651	0.422638	0.422623	0.422608	0.422591	0.422573	0.422554	0.422533	0.422511	0.422488	0.422462	0.422435	0.422407	0.422376	0.422343	0.422309	0.422272	0.422232	0.422191	0.422146	0.422099	0.422049	0.421995	0.421939	0.421879
																				0.422664	0.422661	0.422654	0.422645	0.422635	0.422623	0.42261	0.422595	0.422579	0.422562	0.422544	0.422524	0.422503	0.42248	0.422456	0.42243	0.422402	0.422373	0.422342	0.422309	0.422273	0.422236	0.422196	0.422154	0.422109	0.422061	0.422011	0.421957	0.421901	0.42184
																				0.422633	0.422631	0.422624	0.422615	0.422605	0.422592	0.422579	0.422564	0.422548	0.42253	0.422511	0.422491	0.422469	0.422446	0.422422	0.422395	0.422367	0.422337	0.422305	0.422272	0.422236	0.422198	0.422158	0.422115	0.42207	0.422022	0.421971	0.421917	0.42186	0.4218
																				0.422598	0.422597	0.422591	0.422582	0.422571	0.422559	0.422545	0.42253	0.422514	0.422496	0.422477	0.422456	0.422434	0.42241	0.422385	0.422358	0.422329	0.422299	0.422267	0.422232	0.422196	0.422158	0.422117	0.422074	0.422028	0.42198	0.421929	0.421875	0.421818	0.421758
																				0.42256	0.42256	0.422554	0.422546	0.422535	0.422523	0.422509	0.422494	0.422477	0.422459	0.422439	0.422418	0.422395	0.422371	0.422345	0.422318	0.422289	0.422258	0.422225	0.422191	0.422154	0.422115	0.422074	0.42203	0.421984	0.421936	0.421884	0.42183	0.421773	0.421713
																				0.422518	0.422519	0.422514	0.422506	0.422495	0.422483	0.422469	0.422454	0.422437	0.422418	0.422398	0.422377	0.422354	0.422329	0.422303	0.422275	0.422246	0.422214	0.422181	0.422146	0.422109	0.42207	0.422028	0.421984	0.421938	0.421889	0.421838	0.421783	0.421726	0.421666
																				0.422471	0.422474	0.42247	0.422462	0.422452	0.42244	0.422426	0.42241	0.422393	0.422375	0.422354	0.422333	0.422309	0.422284	0.422258	0.42223	0.4222	0.422168	0.422134	0.422099	0.422061	0.422022	0.42198	0.421936	0.421889	0.42184	0.421788	0.421734	0.421677	0.421617
																				0.42242	0.422425	0.422421	0.422414	0.422405	0.422393	0.422379	0.422363	0.422346	0.422327	0.422307	0.422285	0.422261	0.422236	0.422209	0.422181	0.422151	0.422119	0.422085	0.422049	0.422011	0.421971	0.421929	0.421884	0.421838	0.421788	0.421737	0.421682	0.421625	0.421565
																				0.422363	0.42237	0.422368	0.422362	0.422353	0.422341	0.422327	0.422312	0.422295	0.422276	0.422256	0.422233	0.42221	0.422184	0.422157	0.422129	0.422098	0.422066	0.422032	0.421995	0.421957	0.421917	0.421875	0.42183	0.421783	0.421734	0.421682	0.421628	0.421571	0.421511
																				0.4223	0.42231	0.42231	0.422304	0.422296	0.422285	0.422271	0.422256	0.422239	0.422221	0.4222	0.422178	0.422154	0.422129	0.422102	0.422073	0.422042	0.422009	0.421975	0.421939	0.421901	0.42186	0.421818	0.421773	0.421726	0.421677	0.421625	0.421571	0.421514	0.421454
																				0.422231	0.422244	0.422245	0.422241	0.422234	0.422223	0.422211	0.422196	0.422179	0.422161	0.42214	0.422118	0.422095	0.422069	0.422042	0.422013	0.421982	0.42195	0.421915	0.421879	0.42184	0.4218	0.421758	0.421713	0.421666	0.421617	0.421565	0.421511	0.421454	0.421394
																				0.422155	0.422172	0.422175	0.422172	0.422166	0.422156	0.422144	0.42213	0.422114	0.422096	0.422076	0.422054	0.42203	0.422005	0.421978	0.421949	0.421918	0.421886	0.421851	0.421815	0.421777	0.421736	0.421694	0.421649	0.421602	0.421553	0.421502	0.421448	0.421391	0.421332
																				0.422072	0.422092	0.422098	0.422097	0.422092	0.422084	0.422072	0.422059	0.422043	0.422026	0.422006	0.421985	0.421962	0.421936	0.42191	0.421881	0.42185	0.421818	0.421784	0.421747	0.421709	0.421669	0.421627	0.421582	0.421536	0.421487	0.421435	0.421382	0.421326	0.421267
																				0.421979	0.422005	0.422013	0.422015	0.422011	0.422004	0.421994	0.421982	0.421967	0.42195	0.421931	0.42191	0.421887	0.421863	0.421836	0.421808	0.421778	0.421746	0.421712	0.421676	0.421638	0.421598	0.421556	0.421512	0.421465	0.421417	0.421366	0.421313	0.421257	0.421199
																				0.421878	0.421908	0.42192	0.421924	0.421923	0.421918	0.421909	0.421898	0.421884	0.421868	0.42185	0.42183	0.421808	0.421784	0.421758	0.42173	0.4217	0.421669	0.421635	0.4216	0.421562	0.421523	0.421481	0.421437	0.421391	0.421343	0.421293	0.42124	0.421185	0.421127
																				0.421766	0.421803	0.421819	0.421826	0.421827	0.421824	0.421817	0.421807	0.421795	0.42178	0.421763	0.421744	0.421723	0.421699	0.421674	0.421647	0.421618	0.421587	0.421554	0.421519	0.421482	0.421443	0.421402	0.421359	0.421314	0.421266	0.421216	0.421164	0.42111	0.421053
																				0.421642	0.421687	0.421707	0.421718	0.421722	0.421721	0.421716	0.421709	0.421698	0.421685	0.421669	0.421651	0.421631	0.421609	0.421585	0.421559	0.42153	0.4215	0.421468	0.421434	0.421397	0.421359	0.421319	0.421276	0.421232	0.421185	0.421136	0.421085	0.421031	0.420975
																				0.421507	0.42156	0.421585	0.4216	0.421607	0.421609	0.421607	0.421602	0.421593	0.421582	0.421568	0.421552	0.421533	0.421512	0.421489	0.421464	0.421437	0.421408	0.421377	0.421343	0.421308	0.421271	0.421231	0.42119	0.421146	0.4211	0.421052	0.421002	0.420949	0.420894
																				0.421357	0.42142	0.421452	0.421471	0.421483	0.421488	0.421489	0.421486	0.42148	0.421471	0.421459	0.421445	0.421428	0.421409	0.421387	0.421363	0.421338	0.42131	0.42128	0.421248	0.421214	0.421177	0.421139	0.421098	0.421056	0.421011	0.420964	0.420915	0.420863	0.42081
																				0.421193	0.421266	0.421305	0.42133	0.421346	0.421356	0.421361	0.421361	0.421358	0.421351	0.421342	0.42133	0.421315	0.421298	0.421278	0.421256	0.421232	0.421206	0.421177	0.421147	0.421114	0.421079	0.421042	0.421003	0.420961	0.420918	0.420872	0.420824	0.420774	0.420721
																				0.421012	0.421097	0.421145	0.421176	0.421198	0.421212	0.421221	0.421225	0.421226	0.421222	0.421216	0.421206	0.421194	0.421179	0.421162	0.421142	0.42112	0.421095	0.421069	0.42104	0.421009	0.420975	0.42094	0.420902	0.420862	0.42082	0.420776	0.420729	0.420681	0.42063
																				0.420812	0.420912	0.420969	0.421008	0.421036	0.421056	0.42107	0.421079	0.421083	0.421083	0.42108	0.421074	0.421065	0.421053	0.421038	0.42102	0.421001	0.420978	0.420954	0.420927	0.420898	0.420866	0.420832	0.420796	0.420758	0.420718	0.420675	0.42063	0.420583	0.420534
																				0.420592	0.420708	0.420776	0.420824	0.42086	0.420886	0.420906	0.42092	0.420929	0.420934	0.420934	0.420932	0.420926	0.420917	0.420906	0.420891	0.420874	0.420854	0.420832	0.420808	0.420781	0.420751	0.42072	0.420686	0.42065	0.420611	0.42057	0.420527	0.420482	0.420435
																				0.420349	0.420484	0.420565	0.420623	0.420667	0.420701	0.420728	0.420748	0.420762	0.420772	0.420778	0.42078	0.420778	0.420773	0.420765	0.420754	0.42074	0.420723	0.420704	0.420682	0.420657	0.42063	0.420601	0.42057	0.420536	0.420499	0.420461	0.42042	0.420377	0.420331
																				0.420081	0.420238	0.420333	0.420403	0.420457	0.4205	0.420534	0.420562	0.420583	0.420599	0.42061	0.420617	0.42062	0.420619	0.420615	0.420608	0.420597	0.420584	0.420568	0.420549	0.420528	0.420504	0.420477	0.420448	0.420417	0.420383	0.420347	0.420308	0.420267	0.420224
																				0.419785	0.419966	0.420079	0.420163	0.420228	0.420282	0.420325	0.42036	0.420389	0.420412	0.420429	0.420442	0.42045	0.420455	0.420455	0.420452	0.420446	0.420437	0.420425	0.420409	0.420391	0.42037	0.420347	0.420321	0.420292	0.420261	0.420228	0.420192	0.420153	0.420112
																				0.419458	0.419668	0.4198	0.4199	0.419979	0.420044	0.420098	0.420143	0.42018	0.420211	0.420235	0.420255	0.420269	0.42028	0.420286	0.420288	0.420287	0.420282	0.420274	0.420262	0.420248	0.420231	0.420211	0.420188	0.420162	0.420134	0.420104	0.420071	0.420035	0.419997
																				0.419097	0.419339	0.419494	0.419612	0.419707	0.419785	0.419852	0.419907	0.419955	0.419994	0.420028	0.420055	0.420077	0.420093	0.420106	0.420114	0.420118	0.420118	0.420114	0.420108	0.420098	0.420084	0.420068	0.420049	0.420027	0.420002	0.419975	0.419945	0.419912	0.419877
																				0.418697	0.418977	0.419158	0.419297	0.41941	0.419504	0.419585	0.419653	0.419712	0.419762	0.419805	0.419841	0.419871	0.419895	0.419914	0.419929	0.419939	0.419945	0.419947	0.419945	0.41994	0.419931	0.419919	0.419904	0.419886	0.419865	0.419841	0.419815	0.419785	0.419754
																				0.418253	0.418577	0.418788	0.418952	0.419086	0.419199	0.419295	0.419378	0.41945	0.419513	0.419566	0.419612	0.419652	0.419685	0.419712	0.419734	0.41975	0.419763	0.419771	0.419775	0.419774	0.419771	0.419764	0.419753	0.419739	0.419722	0.419702	0.41968	0.419654	0.419626
																				0.417762	0.418135	0.418382	0.418574	0.418732	0.418867	0.418982	0.419082	0.419169	0.419245	0.419311	0.419369	0.419418	0.419461	0.419497	0.419527	0.419552	0.419571	0.419586	0.419596	0.419602	0.419603	0.419601	0.419596	0.419587	0.419574	0.419558	0.41954	0.419518	0.419493
																				0.417215	0.417647	0.417935	0.41816	0.418347	0.418505	0.418642	0.418762	0.418866	0.418958	0.419038	0.419108	0.41917	0.419223	0.419269	0.419309	0.419342	0.419369	0.419391	0.419408	0.419421	0.419429	0.419432	0.419432	0.419428	0.41942	0.419409	0.419395	0.419378	0.419357
																				0.416608	0.417107	0.417442	0.417707	0.417926	0.418113	0.418275	0.418416	0.41854	0.41865	0.418746	0.418831	0.418906	0.418972	0.419029	0.419079	0.419121	0.419158	0.419188	0.419212	0.419232	0.419246	0.419256	0.419262	0.419264	0.419261	0.419255	0.419246	0.419233	0.419217
																				0.415931	0.416509	0.4169	0.417209	0.417467	0.417686	0.417877	0.418044	0.41819	0.41832	0.418435	0.418536	0.418626	0.418705	0.418775	0.418836	0.41889	0.418936	0.418975	0.419008	0.419035	0.419057	0.419074	0.419086	0.419093	0.419097	0.419096	0.419092	0.419084	0.419072
																				0.415176	0.415847	0.416303	0.416664	0.416965	0.417223	0.417446	0.417642	0.417815	0.417967	0.418103	0.418223	0.418329	0.418424	0.418508	0.418582	0.418646	0.418703	0.418752	0.418794	0.41883	0.41886	0.418884	0.418903	0.418917	0.418927	0.418932	0.418933	0.41893	0.418924
																				0.414332	0.415111	0.415644	0.416066	0.416419	0.41672	0.416981	0.41721	0.417412	0.41759	0.417749	0.41789	0.418015	0.418127	0.418226	0.418314	0.418392	0.41846	0.41852	0.418572	0.418617	0.418656	0.418688	0.418714	0.418735	0.418752	0.418763	0.41877	0.418772	0.418771
																				0.413387	0.414294	0.414916	0.41541	0.415822	0.416173	0.416478	0.416745	0.41698	0.417188	0.417373	0.417537	0.417683	0.417814	0.41793	0.418033	0.418125	0.418206	0.418278	0.418341	0.418396	0.418444	0.418485	0.418519	0.418548	0.418571	0.418589	0.418602	0.418611	0.418615
																				0.412326	0.413384	0.414112	0.41469	0.415171	0.415581	0.415935	0.416245	0.416518	0.416759	0.416973	0.417163	0.417333	0.417484	0.417619	0.417739	0.417847	0.417942	0.418027	0.418102	0.418167	0.418225	0.418275	0.418318	0.418355	0.418386	0.418411	0.41843	0.418445	0.418455
																				0.411133	0.412371	0.413224	0.4139	0.414461	0.414938	0.41535	0.415709	0.416024	0.416303	0.416549	0.416769	0.416964	0.417138	0.417294	0.417433	0.417557	0.417667	0.417766	0.417853	0.417931	0.417999	0.418059	0.418111	0.418157	0.418195	0.418228	0.418254	0.418276	0.418292
																				0.409788	0.411239	0.412241	0.413032	0.413687	0.414242	0.41472	0.415135	0.415498	0.415818	0.416101	0.416353	0.416576	0.416776	0.416954	0.417113	0.417255	0.417382	0.417495	0.417597	0.417687	0.417766	0.417837	0.417899	0.417953	0.418	0.418041	0.418075	0.418103	0.418126
[truncated: 102 more rows]
[truncated: 131 more columns]
