# Supplementary material for: Trajectories and Forces in Four-Electrode Chambers Operated in Object-Shift, Dielectrophoresis and Field-Cage Modes – Considerations from the System’s Point of View
Source: Preprints.org preprint supplement (doi:10.20944/preprints202309.2147.v1), 2023-09-30
Supplement: Supplementary file 5 [file Tab. S4_+++- 0,1-in-1.xls]

## Sheet: Four Side Pointed +-+-__Obj_0
Basic Resistance	Basic Conductance	Mean Resistance	Mean Conductance	k		a_X	a_y	a_Resistance in Route	a_Conductance along trajectory	a_Trajectory length		a_Delta Cond	a_Step width along trajectory	a_Mid-distance	a_norm. Force (Delta Cond./basic/diSTep)		b_X	b_Y	b_Resistance in Routh	b_Conductance along trajectory	b_Trajectory length		b-Delta Cond	b_Step width along trajectory	b_Mid-distance	b_norm. Force (Delta Cond./basic/diSTep)		c_X	c_Y	c_Resistance in Routh	c_Conductance along trajectory	c_Trajectory length		c_Delta Cond	c_Step width along trajectory	c_Mid-distance	c_norm. Force (Delta Cond./basic/diSTep)		d_X	d_Y	d_Resistance in Routh	d_Conductance along trajectory	d_Trajectory length		d_Delta Cond	d_Step width along trajectory	d_Mid-distance	d_norm. Force (Delta Cond./basic/diSTep)
3.05447	0.327389	3.11978	0.321371	0.327389		0.40201	0	17.1097	0.0584465	0		0.0107369	0.00045683	0.000228415	71.7896		-0.40201	0	4.62	0.21645	0		0.00746901	0.00045683	0.000228415	49.9395		0	0.40201	4.6385	0.215587	0		0.00741587	0.000456834	0.000228417	49.5837		0.120603	0.40201	3.17405	0.315055	0		0.000123483	0.000484849	0.000242425	0.777924
						0.401553	0	14.4543	0.0691834	0.00045683		0.0107369	0.00045683	0.000685244	71.7896		-0.401553	0	4.4659	0.223919	0.00045683		0.00746901	0.00045683	0.000685244	49.9395		-2.0082e-06	0.401553	4.48425	0.223003	0.000456834		0.00741587	0.000456835	0.000685251	49.5836		0.120765	0.401553	3.17281	0.315179	0.000484849		0.000123454	0.000484705	0.000727202	0.777972
						0.401096	0	12.5125	0.0799203	0.000913659		0.0107369	0.00045683	0.00114207	71.7896		-0.401096	0	4.32174	0.231388	0.000913659		0.00746901	0.00045683	0.00114207	49.9395		-4.1711e-06	0.401096	4.33993	0.230418	0.000913669		0.00741589	0.000456836	0.00114209	49.5837		0.120927	0.401096	3.17156	0.315302	0.000969554		0.000123425	0.000484561	0.00121183	0.778019
						0.40064	0	11.0306	0.0906573	0.00137049		0.0107369	0.00045683	0.0015989	71.7896		-0.40064	0	4.1866	0.238857	0.00137049		0.00746901	0.00045683	0.0015989	49.9395		-6.50197e-06	0.40064	4.20461	0.237834	0.0013705		0.00741592	0.000456837	0.00159892	49.5838		0.121089	0.40064	3.17032	0.315425	0.00145412		0.000123395	0.000484415	0.00169632	0.778067
						0.400183	0	9.8625	0.101394	0.00182732		0.0107369	0.00045683	0.00205573	71.7896		-0.400183	0	4.05966	0.246326	0.00182732		0.00746901	0.00045683	0.00205573	49.9395		-9.01586e-06	0.400183	4.07747	0.24525	0.00182734		0.00741595	0.000456838	0.00205576	49.5838		0.12125	0.400183	3.16908	0.315549	0.00193853		0.000123365	0.000484267	0.00218066	0.778115
						0.399726	0	8.91813	0.112131	0.00228415		0.0107369	0.00045683	0.00251256	71.7896		-0.399726	0	3.94019	0.253795	0.00228415		0.00746901	0.00045683	0.00251256	49.9395		-1.173e-05	0.399726	3.95779	0.252666	0.00228418		0.00741598	0.000456839	0.0025126	49.5839		0.121411	0.399726	3.16784	0.315672	0.0024228		0.000123335	0.000484119	0.00266486	0.778162
						0.399269	0	8.13881	0.122868	0.00274098		0.0107369	0.00045683	0.00296939	71.7896		-0.399269	0	3.82754	0.261264	0.00274098		0.00746901	0.00045683	0.00296939	49.9395		-1.4664e-05	0.399269	3.84494	0.260082	0.00274102		0.00741602	0.000456841	0.00296944	49.584		0.121571	0.399269	3.16661	0.315795	0.00290692		0.000123304	0.000483969	0.0031489	0.77821
						0.398812	0	7.48475	0.133605	0.00319781		0.0107369	0.00045683	0.00342622	71.7896		-0.398812	0	3.72116	0.268733	0.00319781		0.00746901	0.00045683	0.00342622	49.9395		-1.78406e-05	0.398812	3.73834	0.267498	0.00319786		0.00741606	0.000456843	0.00342628	49.584		0.121731	0.398812	3.16537	0.315919	0.00339088		0.000123273	0.000483817	0.00363279	0.778258
						0.398355	0	6.92799	0.144342	0.00365464		0.0107369	0.00045683	0.00388305	71.7896		-0.398355	0	3.62054	0.276202	0.00365464		0.00746901	0.00045683	0.00388305	49.9395		-2.12865e-05	0.398355	3.6375	0.274914	0.0036547		0.0074161	0.000456845	0.00388312	49.5841		0.12189	0.398355	3.16414	0.316042	0.0038747		0.000123242	0.000483664	0.00411653	0.778305
						0.397899	0	6.44833	0.155079	0.00411147		0.0107369	0.00045683	0.00433988	71.7896		-0.397899	0	3.52521	0.283671	0.00411147		0.00746901	0.00045683	0.00433988	49.9395		-2.50326e-05	0.397899	3.54195	0.28233	0.00411155		0.00741615	0.000456848	0.00433997	49.5841		0.122049	0.397899	3.1629	0.316165	0.00435837		0.00012321	0.000483509	0.00460012	0.778353
						0.397442	0	6.03079	0.165816	0.0045683		0.0107369	0.00045683	0.00479671	71.7896		-0.397442	0	3.43477	0.29114	0.0045683		0.00746901	0.00045683	0.00479671	49.9395		-2.91158e-05	0.397442	3.45129	0.289747	0.00456839		0.00741584	0.000456851	0.00479682	49.5816		0.122207	0.397442	3.16167	0.316289	0.00484188		0.000123178	0.000483352	0.00508355	0.778401
						0.396985	0	5.66403	0.176553	0.00502513		0.00351487	0.00045683	0.00525354	23.5012		-0.396985	0	3.34886	0.298609	0.00502513		0.000946356	0.00045683	0.00525354	6.32755		-3.35801e-05	0.396985	3.36516	0.297162	0.00502524		0.000946399	0.000456856	0.00525367	6.32747		0.122365	0.396985	3.16044	0.316412	0.00532523		7.84699e-05	0.000483194	0.00556682	0.49604
						0.396528	0	5.55347	0.180068	0.00548196		0.00351487	0.00045683	0.00571037	23.5012		-0.396528	0	3.33828	0.299555	0.00548196		0.000946356	0.00045683	0.00571037	6.32755		-3.84788e-05	0.396528	3.35448	0.298109	0.0054821		0.000946443	0.00045686	0.00571053	6.32772		0.122523	0.396528	3.15966	0.31649	0.00580842		7.86053e-05	0.00048385	0.00605035	0.496222
						0.396071	0	5.44714	0.183582	0.00593878		0.00351487	0.00045683	0.0061672	23.5012		-0.396071	0	3.32777	0.300502	0.00593878		0.000946356	0.00045683	0.0061672	6.32755		-4.37089e-05	0.396071	3.34386	0.299055	0.00593896		0.000946496	0.000456864	0.00616739	6.32801		0.122682	0.396071	3.15887	0.316569	0.00629227		7.87492e-05	0.000484556	0.00653455	0.496407
						0.395614	0	5.34481	0.187097	0.00639561		0.00351487	0.00045683	0.00662403	23.5012		-0.395614	0	3.31732	0.301448	0.00639561		0.000946356	0.00045683	0.00662403	6.32755		-4.93299e-05	0.395614	3.33331	0.300002	0.00639582		0.000946559	0.00045687	0.00662426	6.32835		0.122844	0.395614	3.15809	0.316648	0.00677683		7.89023e-05	0.000485316	0.00701949	0.496593
						0.395158	0	5.24625	0.190612	0.00685244		0.00351487	0.00045683	0.00708086	23.5012		-0.395158	0	3.30694	0.302395	0.00685244		0.000946356	0.00045683	0.00708086	6.32755		-5.54186e-05	0.395158	3.32283	0.300948	0.00685269		0.000946637	0.000456878	0.00708113	6.32875		0.123008	0.395158	3.1573	0.316726	0.00726214		7.90656e-05	0.000486137	0.00750521	0.496781
						0.394701	0	5.15126	0.194127	0.00730927		0.00351487	0.00045683	0.00753769	23.5012		-0.394701	0	3.29662	0.303341	0.00730927		0.000946356	0.00045683	0.00753769	6.32755		-6.20771e-05	0.394701	3.31241	0.301895	0.00730957		0.000946733	0.000456889	0.00753802	6.32924		0.123174	0.394701	3.15651	0.316805	0.00774828		7.92551e-05	0.000487025	0.00799179	0.497062
						0.394244	0	5.05965	0.197642	0.0077661		0.00351487	0.00045683	0.00799452	23.5012		-0.394244	0	3.28637	0.304287	0.0077661		0.000946356	0.00045683	0.00799452	6.32755		-6.94452e-05	0.394244	3.30206	0.302842	0.00776646		0.000946855	0.000456905	0.00799491	6.32985		0.123343	0.394244	3.15572	0.316885	0.00823531		8.26952e-05	0.00048799	0.0084793	0.517612
						0.393787	0	4.97125	0.201157	0.00822293		0.00351487	0.00045683	0.00845135	23.5012		-0.393787	0	3.27618	0.305234	0.00822293		0.000946356	0.00045683	0.00845135	6.32755		-7.77214e-05	0.393787	3.29176	0.303789	0.00822337		0.000947018	0.000456928	0.00845183	6.33061		0.123514	0.393787	3.1549	0.316967	0.0087233		8.28615e-05	0.00048904	0.00896782	0.51754
						0.39333	0	4.88587	0.204672	0.00867976		0.00351487	0.00045683	0.00890818	23.5012		-0.39333	0	3.26605	0.30618	0.00867976		0.000946356	0.00045683	0.00890818	6.32755		-8.72008e-05	0.39333	3.28153	0.304736	0.00868029		0.000947244	0.000456966	0.00890878	6.3316		0.123689	0.39333	3.15407	0.31705	0.00921234		8.30404e-05	0.000490186	0.00945743	0.517444
						0.392873	0	4.80338	0.208187	0.00913659		0.00351487	0.00045683	0.00936501	23.5012		-0.392873	0	3.25599	0.307126	0.00913659		0.000946356	0.00045683	0.00936501	6.32755		-9.83513e-05	0.392873	3.27137	0.305683	0.00913726		0.000947579	0.000457033	0.00936578	6.33291		0.123867	0.392873	3.15325	0.317133	0.00970252		8.32332e-05	0.000491442	0.00994824	0.517321
						0.392417	0	4.72363	0.211701	0.00959342		0.00351487	0.00045683	0.00982184	23.5012		-0.392417	0	3.24599	0.308073	0.00959342		0.000946356	0.00045683	0.00982184	6.32755		-0.000111979	0.392417	3.26126	0.30663	0.00959429		0.000943788	0.000457172	0.00982288	6.30566		0.124048	0.392417	3.15242	0.317217	0.010194		8.34415e-05	0.000492822	0.0104404	0.517163
						0.39196	0	4.64649	0.215216	0.0100503		0.0019921	0.00045683	0.0102787	13.3196		-0.39196	0	3.23605	0.309019	0.0100503		0.000418667	0.00045683	0.0102787	2.79931		-0.000129658	0.39196	3.25125	0.307574	0.0100515		0.000423409	0.000457541	0.0102802	2.8266		0.124233	0.39196	3.15159	0.3173	0.0106868		6.30542e-05	0.000494345	0.010934	0.3896
						0.391503	0	4.60387	0.217208	0.0105071		0.0019921	0.00045683	0.0107355	13.3196		-0.391503	0	3.23167	0.309438	0.0105071		0.000418667	0.00045683	0.0107355	2.79931		-0.000155167	0.391503	3.24678	0.307998	0.010509		0.000423509	0.000457597	0.0107378	2.82693		0.124421	0.391503	3.15097	0.317363	0.0111811		6.31132e-05	0.000494748	0.0114285	0.389647
						0.391046	0	4.56203	0.219201	0.0109639		0.0019921	0.00045683	0.0111923	13.3196		-0.391046	0	3.2273	0.309856	0.0109639		0.000418667	0.00045683	0.0111923	2.79931		-0.000181655	0.391046	3.24232	0.308421	0.0109666		0.000423618	0.000457661	0.0111954	2.82727		0.124611	0.391046	3.15034	0.317426	0.0116759		6.31749e-05	0.00049517	0.0119235	0.389695
						0.390589	0	4.52095	0.221193	0.0114207		0.0019921	0.00045683	0.0116492	13.3196		-0.390589	0	3.22295	0.310275	0.0114207		0.000418667	0.00045683	0.0116492	2.79931		-0.000209221	0.390589	3.23787	0.308845	0.0114243		0.00042374	0.000457734	0.0116531	2.82762		0.124802	0.390589	3.14971	0.317489	0.012171		6.32395e-05	0.000495616	0.0124189	0.389743
						0.390132	0	4.48059	0.223185	0.0118776		0.0019921	0.00045683	0.012106	13.3196		-0.390132	0	3.2186	0.310694	0.0118776		0.000418667	0.00045683	0.012106	2.79931		-0.000237979	0.390132	3.23344	0.309268	0.011882		0.000423875	0.000457819	0.0121109	2.828		0.124995	0.390132	3.14908	0.317553	0.0126667		6.33072e-05	0.000496085	0.0129147	0.389792
						0.389676	0	4.44095	0.225177	0.0123344		0.0019921	0.00045683	0.0125628	13.3196		-0.389676	0	3.21427	0.311112	0.0123344		0.000418667	0.00045683	0.0125628	2.79931		-0.000268063	0.389676	3.22901	0.309692	0.0123398		0.000424026	0.000457919	0.0125688	2.82839		0.125188	0.389676	3.14846	0.317616	0.0131627		6.33782e-05	0.000496579	0.013411	0.38984
						0.389219	0	4.40201	0.227169	0.0127912		0.0019921	0.00045683	0.0130196	13.3196		-0.389219	0	3.20995	0.311531	0.0127912		0.000418667	0.00045683	0.0130196	2.79931		-0.000299631	0.389219	3.2246	0.310116	0.0127977		0.000424196	0.000458037	0.0130268	2.82879		0.125383	0.389219	3.14783	0.317679	0.0136593		6.34527e-05	0.000497101	0.0139079	0.389889
						0.388762	0	4.36374	0.229161	0.0132481		0.0019921	0.00045683	0.0134765	13.3196		-0.388762	0	3.20565	0.31195	0.0132481		0.000418667	0.00045683	0.0134765	2.79931		-0.000332871	0.388762	3.22019	0.310541	0.0132558		0.000424389	0.000458179	0.0134849	2.8292		0.125579	0.388762	3.1472	0.317743	0.0141564		6.19617e-05	0.000497653	0.0144053	0.380305
						0.388305	0	4.32614	0.231153	0.0137049		0.0019921	0.00045683	0.0139333	13.3196		-0.388305	0	3.20135	0.312368	0.0137049		0.000418667	0.00045683	0.0139333	2.79931		-0.00036801	0.388305	3.2158	0.310965	0.013714		0.000424611	0.000458351	0.0139431	2.82962		0.125776	0.388305	3.14659	0.317805	0.0146541		6.15041e-05	0.000498227	0.0149032	0.377062
						0.387848	0	4.28917	0.233145	0.0141617		0.0019921	0.00045683	0.0143901	13.3196		-0.387848	0	3.19706	0.312787	0.0141617		0.000418667	0.00045683	0.0143901	2.79931		-0.000405328	0.387848	3.21141	0.31139	0.0141723		0.000424868	0.000458564	0.0144016	2.83002		0.125975	0.387848	3.14598	0.317866	0.0151523		6.15727e-05	0.00049883	0.0154017	0.377026
						0.387392	0	4.25283	0.235137	0.0146185		0.0019921	0.00045683	0.014847	13.3196		-0.387392	0	3.19279	0.313206	0.0146185		0.000418667	0.00045683	0.014847	2.79931		-0.000445168	0.387392	3.20704	0.311814	0.0146309		0.000416301	0.00045883	0.0148603	2.77134		0.126175	0.387392	3.14537	0.317928	0.0156511		6.1645e-05	0.00049947	0.0159009	0.376985
						0.386935	0	4.21711	0.237129	0.0150754		0.00133218	0.00045683	0.0153038	8.90724		-0.386935	0	3.18853	0.313624	0.0150754		0.000244443	0.00045683	0.0153038	1.6344		-0.000487965	0.386935	3.20276	0.312231	0.0150897		0.000250746	0.000459171	0.0153193	1.66799		0.126377	0.386935	3.14476	0.317989	0.0161506		4.93536e-05	0.000500149	0.0164007	0.301408
						0.386478	0	4.19355	0.238462	0.0155322		0.00133218	0.00045683	0.0157606	8.90724		-0.386478	0	3.18604	0.313869	0.0155322		0.000244443	0.00045683	0.0157606	1.6344		-0.00053428	0.386478	3.20019	0.312481	0.0155489		0.000250855	0.000459305	0.0157785	1.66823		0.126581	0.386478	3.14427	0.318039	0.0166508		4.9382e-05	0.000500402	0.016901	0.301428
						0.386021	0	4.17025	0.239794	0.015989		0.00133218	0.00045683	0.0162175	8.90724		-0.386021	0	3.18357	0.314113	0.015989		0.000244443	0.00045683	0.0162175	1.6344		-0.000581897	0.386021	3.19762	0.312732	0.0160082		0.000250971	0.000459451	0.0162379	1.66848		0.126785	0.386021	3.14378	0.318088	0.0171512		4.94687e-05	0.000500667	0.0174015	0.301799
						0.385564	0	4.14721	0.241126	0.0164459		0.00133218	0.00045683	0.0166743	8.90724		-0.385564	0	3.18109	0.314358	0.0164459		0.000244443	0.00045683	0.0166743	1.6344		-0.000630911	0.385564	3.19506	0.312983	0.0164676		0.000251097	0.000459614	0.0166974	1.66872		0.12699	0.385564	3.14329	0.318138	0.0176518		5.11117e-05	0.000500943	0.0179023	0.31165
						0.385107	0	4.12442	0.242458	0.0169027		0.00133218	0.00045683	0.0171311	8.90724		-0.385107	0	3.17862	0.314602	0.0169027		0.000244443	0.00045683	0.0171311	1.6344		-0.000681425	0.385107	3.1925	0.313234	0.0169272		0.000251232	0.000459794	0.0171571	1.66896		0.127196	0.385107	3.14279	0.318189	0.0181528		5.11389e-05	0.000501231	0.0184034	0.311637
						0.384651	0	4.10189	0.24379	0.0173595		0.00133218	0.00045683	0.0175879	8.90724		-0.384651	0	3.17615	0.314847	0.0173595		0.000244443	0.00045683	0.0175879	1.6344		-0.000733556	0.384651	3.18994	0.313486	0.017387		0.000251378	0.000459996	0.017617	1.6692		0.127402	0.384651	3.14228	0.31824	0.018654		5.11673e-05	0.000501532	0.0189048	0.311623
						0.384194	0	4.07959	0.245122	0.0178164		0.00133218	0.00045683	0.0180448	8.90724		-0.384194	0	3.17369	0.315091	0.0178164		0.000244443	0.00045683	0.0180448	1.6344		-0.000787435	0.384194	3.18738	0.313737	0.017847		0.000251537	0.000460222	0.0180771	1.66943		0.127609	0.384194	3.14178	0.318291	0.0191555		5.11969e-05	0.000501846	0.0194065	0.311608
						0.383737	0	4.05754	0.246455	0.0182732		0.00133218	0.00045683	0.0185016	8.90724		-0.383737	0	3.17123	0.315335	0.0182732		0.000244443	0.00045683	0.0185016	1.6344		-0.00084321	0.383737	3.18483	0.313988	0.0183072		0.000251709	0.000460477	0.0185375	1.66966		0.127817	0.383737	3.14127	0.318342	0.0196574		5.12278e-05	0.000502175	0.0199085	0.311591
						0.38328	0	4.03573	0.247787	0.01873		0.00133218	0.00045683	0.0189584	8.90724		-0.38328	0	3.16877	0.31558	0.01873		0.000244443	0.00045683	0.0189584	1.6344		-0.000901049	0.38328	3.18228	0.31424	0.0187677		0.000251331	0.000460766	0.0189981	1.6661		0.128025	0.38328	3.14077	0.318393	0.0201596		5.126e-05	0.00050252	0.0204108	0.311574
						0.382823	0	4.01415	0.249119	0.0191868		0.00133218	0.00045683	0.0194153	8.90724		-0.382823	0	3.16632	0.315824	0.0191868		0.000244443	0.00045683	0.0194153	1.6344		-0.000961148	0.382823	3.17974	0.314492	0.0192285		0.000245901	0.000461096	0.019459	1.62893		0.128234	0.382823	3.14026	0.318445	0.0206621		5.12936e-05	0.00050288	0.0209135	0.311554
						0.382366	0	3.99279	0.250451	0.0196437		0.00133218	0.00045683	0.0198721	8.90724		-0.382366	0	3.16387	0.316069	0.0196437		0.000244443	0.00045683	0.0198721	1.6344		-0.00102373	0.382366	3.17725	0.314737	0.0196896		0.000246097	0.000461476	0.0199203	1.62889		0.128445	0.382366	3.13976	0.318496	0.021165		5.13287e-05	0.000503259	0.0214166	0.311533
						0.38191	0	3.97167	0.251783	0.0201005		0.0009668	0.00045683	0.0203289	6.46424		-0.38191	0	3.16142	0.316313	0.0201005		0.000162183	0.00045683	0.0203289	1.08439		-0.00108905	0.38191	3.17477	0.314984	0.0201511		0.000169357	0.000461916	0.020382	1.11989		0.128656	0.38191	3.13925	0.318547	0.0216682		4.2288e-05	0.000503655	0.02192	0.256459
						0.381453	0	3.95648	0.25275	0.0205573		0.0009668	0.00045683	0.0207857	6.46424		-0.381453	0	3.1598	0.316475	0.0205573		0.000162183	0.00045683	0.0207857	1.08439		-0.00115741	0.381453	3.17306	0.315153	0.020613		0.000169468	0.000462148	0.0208441	1.12006		0.128868	0.381453	3.13883	0.31859	0.0221719		4.23042e-05	0.000503832	0.0224238	0.256468
						0.380996	0	3.9414	0.253717	0.0210142		0.0009668	0.00045683	0.0212426	6.46424		-0.380996	0	3.15818	0.316638	0.0210142		0.000162183	0.00045683	0.0212426	1.08439		-0.00122732	0.380996	3.17136	0.315322	0.0210751		0.000169586	0.000462399	0.0213063	1.12023		0.12908	0.380996	3.13842	0.318632	0.0226757		4.23211e-05	0.000504015	0.0229277	0.256477
						0.380539	0	3.92644	0.254684	0.021471		0.0009668	0.00045683	0.0216994	6.46424		-0.380539	0	3.15657	0.3168	0.021471		0.000162183	0.00045683	0.0216994	1.08439		-0.00129887	0.380539	3.16965	0.315492	0.0215375		0.00016971	0.000462671	0.0217689	1.12039		0.129293	0.380539	3.138	0.318674	0.0231797		4.23387e-05	0.000504206	0.0234318	0.256487
						0.380082	0	3.91159	0.255651	0.0219278		0.0009668	0.00045683	0.0221562	6.46424		-0.380082	0	3.15495	0.316962	0.0219278		0.000162183	0.00045683	0.0221562	1.08439		-0.00137216	0.380082	3.16795	0.315662	0.0220002		0.000169841	0.000462965	0.0222317	1.12055		0.129507	0.380082	3.13758	0.318717	0.0236839		4.23568e-05	0.000504404	0.0239361	0.256496
						0.379625	0	3.89685	0.256617	0.0223847		0.0009668	0.00045683	0.0226131	6.46424		-0.379625	0	3.15334	0.317124	0.0223847		0.000162183	0.00045683	0.0226131	1.08439		-0.00144728	0.379625	3.16625	0.315831	0.0224632		0.000169981	0.000463286	0.0226948	1.1207		0.12972	0.379625	3.13717	0.318759	0.0241883		4.23757e-05	0.000504609	0.0244406	0.256506
						0.379169	0	3.88223	0.257584	0.0228415		0.0009668	0.00045683	0.0230699	6.46424		-0.379169	0	3.15173	0.317286	0.0228415		0.000162183	0.00045683	0.0230699	1.08439		-0.00152435	0.379169	3.16454	0.316001	0.0229264		0.00017013	0.000463635	0.0231583	1.12083		0.129935	0.379169	3.13675	0.318801	0.0246929		4.23953e-05	0.000504823	0.0249453	0.256515
						0.378712	0	3.86771	0.258551	0.0232983		0.0009668	0.00045683	0.0235267	6.46424		-0.378712	0	3.15012	0.317449	0.0232983		0.000162183	0.00045683	0.0235267	1.08439		-0.0016035	0.378712	3.16284	0.316172	0.0233901		0.000167565	0.000464019	0.0236221	1.10302		0.13015	0.378712	3.13633	0.318844	0.0251978		4.24156e-05	0.000505046	0.0254503	0.256525
						0.378255	0	3.8533	0.259518	0.0237551		0.0009668	0.00045683	0.0239836	6.46424		-0.378255	0	3.14851	0.317611	0.0237551		0.000162183	0.00045683	0.0239836	1.08439		-0.00168486	0.378255	3.16116	0.316339	0.0238541		0.000165775	0.00046444	0.0240863	1.09025		0.130365	0.378255	3.13592	0.318886	0.0257028		4.24367e-05	0.000505278	0.0259554	0.256535
						0.377798	0	3.839	0.260485	0.024212		0.0009668	0.00045683	0.0244404	6.46424		-0.377798	0	3.1469	0.317773	0.024212		0.000162183	0.00045683	0.0244404	1.08439		-0.0017686	0.377798	3.15951	0.316505	0.0243185		0.000165935	0.000464904	0.024551	1.09021		0.130581	0.377798	3.1355	0.318929	0.0262081		4.15667e-05	0.000505519	0.0264608	0.251156
						0.377341	0	3.8248	0.261451	0.0246688		0.0009668	0.00045683	0.0248972	6.46424		-0.377341	0	3.1453	0.317935	0.0246688		0.000162183	0.00045683	0.0248972	1.08439		-0.00185487	0.377341	3.15785	0.316671	0.0247834		0.000166107	0.000465419	0.0250162	1.09014		0.130797	0.377341	3.13509	0.31897	0.0267136		4.11369e-05	0.000505756	0.0269665	0.248442
						0.376884	0	3.81071	0.262418	0.0251256		0.000737644	0.00045683	0.025354	4.93205		-0.376884	0	3.14369	0.318097	0.0251256		0.000115939	0.00045683	0.025354	0.775196		-0.00194387	0.376884	3.1562	0.316837	0.0252489		0.00012376	0.000465991	0.0254819	0.811221		0.131014	0.376884	3.13469	0.319011	0.0272194		3.45692e-05	0.000505996	0.0274724	0.208679
						0.376428	0	3.80003	0.263156	0.0255825		0.000737644	0.00045683	0.0258109	4.93205		-0.376428	0	3.14255	0.318213	0.0255825		0.000115939	0.00045683	0.0258109	0.775196		-0.00203582	0.376428	3.15496	0.316961	0.0257149		0.000123872	0.000466344	0.025948	0.811339		0.131232	0.376428	3.13435	0.319046	0.0277254		3.51e-05	0.00050611	0.0279784	0.211835
						0.375971	0	3.78941	0.263893	0.0260393		0.000737644	0.00045683	0.0262677	4.93205		-0.375971	0	3.1414	0.318329	0.0260393		0.000115939	0.00045683	0.0262677	0.775196		-0.00212954	0.375971	3.15373	0.317085	0.0261812		0.000123989	0.000466721	0.0264146	0.811449		0.13145	0.375971	3.134	0.319081	0.0282315		3.5651e-05	0.000506228	0.0284846	0.21511
						0.375514	0	3.77885	0.264631	0.0264961		0.000737644	0.00045683	0.0267245	4.93205		-0.375514	0	3.14026	0.318445	0.0264961		0.000115939	0.00045683	0.0267245	0.775196		-0.00222511	0.375514	3.1525	0.317209	0.0266479		0.000124111	0.000467122	0.0268815	0.811552		0.131668	0.375514	3.13365	0.319117	0.0287377		3.5659e-05	0.000506351	0.0289909	0.215106
						0.375057	0	3.76834	0.265369	0.0269529		0.000737644	0.00045683	0.0271814	4.93205		-0.375057	0	3.13912	0.318561	0.0269529		0.000115939	0.00045683	0.0271814	0.775196		-0.00232263	0.375057	3.15127	0.317333	0.027115		0.00012424	0.000467552	0.0273488	0.811645		0.131886	0.375057	3.1333	0.319152	0.029244		3.56673e-05	0.000506478	0.0294973	0.215102
						0.3746	0	3.7579	0.266106	0.0274098		0.000737644	0.00045683	0.0276382	4.93205		-0.3746	0	3.13797	0.318677	0.0274098		0.000115939	0.00045683	0.0276382	0.775196		-0.00242219	0.3746	3.15003	0.317457	0.0275826		0.000122784	0.000468012	0.0278166	0.801344		0.132105	0.3746	3.13295	0.319188	0.0297505		3.56759e-05	0.00050661	0.0300038	0.215098
						0.374143	0	3.74751	0.266844	0.0278666		0.000737644	0.00045683	0.028095	4.93205		-0.374143	0	3.13683	0.318793	0.0278666		0.000115939	0.00045683	0.028095	0.775196		-0.00252388	0.374143	3.14882	0.31758	0.0280506		0.000120795	0.000468506	0.0282849	0.787535		0.132324	0.374143	3.1326	0.319224	0.0302571		3.56848e-05	0.000506746	0.0305105	0.215094
						0.373687	0	3.73718	0.267582	0.0283234		0.000737644	0.00045683	0.0285519	4.93205		-0.373687	0	3.13569	0.318909	0.0283234		0.000115939	0.00045683	0.0285519	0.775196		-0.00262783	0.373687	3.14762	0.317701	0.0285191		0.000120929	0.000469038	0.0287536	0.787513		0.132543	0.373687	3.13225	0.319259	0.0307639		3.5694e-05	0.000506887	0.0310173	0.21509
						0.37323	0	3.7269	0.268319	0.0287803		0.000737644	0.00045683	0.0290087	4.93205		-0.37323	0	3.13455	0.319025	0.0287803		0.000115939	0.00045683	0.0290087	0.775196		-0.00273415	0.37323	3.14642	0.317821	0.0289882		0.00012107	0.000469611	0.029223	0.787469		0.132763	0.37323	3.1319	0.319295	0.0312708		3.57036e-05	0.000507034	0.0315243	0.215085
						0.372773	0	3.71668	0.269057	0.0292371		0.000737644	0.00045683	0.0294655	4.93205		-0.372773	0	3.13341	0.319141	0.0292371		0.000115939	0.00045683	0.0294655	0.775196		-0.00284297	0.372773	3.14522	0.317943	0.0294578		0.000121219	0.000470232	0.0296929	0.787399		0.132983	0.372773	3.13155	0.319331	0.0317778		3.57135e-05	0.000507186	0.0320314	0.21508
						0.372316	0	3.70652	0.269795	0.0296939		0.000737644	0.00045683	0.0299223	4.93205		-0.372316	0	3.13228	0.319257	0.0296939		0.000115939	0.00045683	0.0299223	0.775196		-0.00295443	0.372316	3.14402	0.318064	0.029928		0.000121377	0.000470904	0.0301634	0.7873		0.133203	0.372316	3.1312	0.319366	0.032285		3.57237e-05	0.000507344	0.0325387	0.215075
						0.371859	0	3.69642	0.270532	0.0301508		0.000582655	0.00045683	0.0303792	3.89576		-0.371859	0	3.13114	0.319373	0.0301508		8.70889e-05	0.00045683	0.0303792	0.582296		-0.0030687	0.371859	3.14282	0.318185	0.0303989		9.54744e-05	0.000471635	0.0306347	0.618325		0.133424	0.371859	3.13085	0.319402	0.0327923		3.03595e-05	0.000507507	0.0330461	0.18272
						0.371402	0	3.68847	0.271115	0.0306076		0.000582655	0.00045683	0.030836	3.89576		-0.371402	0	3.13029	0.31946	0.0306076		8.70889e-05	0.00045683	0.030836	0.582296		-0.00318594	0.371402	3.14188	0.318281	0.0308705		9.55865e-05	0.000472133	0.0311066	0.618397		0.133645	0.371402	3.13055	0.319432	0.0332998		3.03654e-05	0.0005076	0.0335536	0.182723
						0.370946	0	3.68056	0.271698	0.0310644		0.000582655	0.00045683	0.0312928	3.89576		-0.370946	0	3.12943	0.319547	0.0310644		8.70889e-05	0.00045683	0.0312928	0.582296		-0.00330517	0.370946	3.14094	0.318376	0.0313427		9.5703e-05	0.000472659	0.031579	0.618462		0.133866	0.370946	3.13025	0.319463	0.0338074		3.03716e-05	0.000507695	0.0340613	0.182726
						0.370489	0	3.67269	0.27228	0.0315212		0.000582655	0.00045683	0.0317497	3.89576		-0.370489	0	3.12858	0.319634	0.0315212		8.70889e-05	0.00045683	0.0317497	0.582296		-0.00342647	0.370489	3.13999	0.318472	0.0318153		9.39692e-05	0.000473215	0.0320519	0.606544		0.134088	0.370489	3.12996	0.319493	0.0343151		3.03779e-05	0.000507793	0.034569	0.182729
						0.370032	0	3.66484	0.272863	0.0319781		0.000582655	0.00045683	0.0322065	3.89576		-0.370032	0	3.12773	0.319721	0.0319781		8.70889e-05	0.00045683	0.0322065	0.582296		-0.00354992	0.370032	3.13907	0.318566	0.0322885		9.28816e-05	0.000473804	0.0325254	0.598778		0.13431	0.370032	3.12966	0.319524	0.0348229		3.03845e-05	0.000507894	0.0350769	0.182732
						0.369575	0	3.65704	0.273446	0.0324349		0.000582655	0.00045683	0.0326633	3.89576		-0.369575	0	3.12688	0.319808	0.0324349		8.70889e-05	0.00045683	0.0326633	0.582296		-0.00367561	0.369575	3.13815	0.318659	0.0327623		9.30009e-05	0.000474429	0.0329996	0.598758		0.134531	0.369575	3.12936	0.319554	0.0353308		3.03912e-05	0.000507998	0.0355848	0.182735
						0.369118	0	3.64926	0.274028	0.0328917		0.000582655	0.00045683	0.0331201	3.89576		-0.369118	0	3.12602	0.319895	0.0328917		8.70889e-05	0.00045683	0.0331201	0.582296		-0.00380363	0.369118	3.13724	0.318752	0.0332368		9.31254e-05	0.000475092	0.0334743	0.598723		0.134754	0.369118	3.12906	0.319584	0.0358388		3.03981e-05	0.000508105	0.0360929	0.182738
						0.368661	0	3.64152	0.274611	0.0333486		0.000582655	0.00045683	0.033577	3.89576		-0.368661	0	3.12517	0.319982	0.0333486		8.70889e-05	0.00045683	0.033577	0.582296		-0.00393409	0.368661	3.13632	0.318845	0.0337119		9.32555e-05	0.000475797	0.0339498	0.59867		0.134976	0.368661	3.12877	0.319615	0.0363469		3.04052e-05	0.000508216	0.036601	0.182741
						0.368205	0	3.63381	0.275193	0.0338054		0.000582655	0.00045683	0.0340338	3.89576		-0.368205	0	3.12432	0.320069	0.0338054		8.70889e-05	0.00045683	0.0340338	0.582296		-0.00406709	0.368205	3.1354	0.318938	0.0341877		9.33916e-05	0.000476549	0.0344259	0.598599		0.135199	0.368205	3.12847	0.319645	0.0368551		3.04126e-05	0.00050833	0.0371093	0.182744
						0.367748	0	3.62613	0.275776	0.0342622		0.000582655	0.00045683	0.0344906	3.89576		-0.367748	0	3.12347	0.320156	0.0342622		8.70889e-05	0.00045683	0.0344906	0.582296		-0.00420275	0.367748	3.13449	0.319032	0.0346642		9.35341e-05	0.00047735	0.0349029	0.598506		0.135422	0.367748	3.12817	0.319676	0.0373635		3.04202e-05	0.000508447	0.0376177	0.182747
						0.367291	0	3.61848	0.276359	0.034719		0.000582655	0.00045683	0.0349475	3.89576		-0.367291	0	3.12262	0.320243	0.034719		8.70889e-05	0.00045683	0.0349475	0.582296		-0.00434121	0.367291	3.13357	0.319125	0.0351416		9.36838e-05	0.000478208	0.0353807	0.598388		0.135645	0.367291	3.12787	0.319706	0.0378719		2.96789e-05	0.000508569	0.0381262	0.178252
						0.366834	0	3.61087	0.276941	0.0351759		0.000472268	0.00045683	0.0354043	3.15769		-0.366834	0	3.12178	0.320331	0.0351759		6.77812e-05	0.00045683	0.0354043	0.4532		-0.00448259	0.366834	3.13265	0.319219	0.0356198		7.64552e-05	0.000479126	0.0358593	0.487408		0.135868	0.366834	3.12758	0.319736	0.0383805		2.54832e-05	0.000508672	0.0386348	0.153021
						0.366377	0	3.60472	0.277414	0.0356327		0.000472268	0.00045683	0.0358611	3.15769		-0.366377	0	3.12111	0.320398	0.0356327		6.77812e-05	0.00045683	0.0358611	0.4532		-0.00462705	0.366377	3.1319	0.319295	0.0360989		7.42284e-05	0.000479799	0.0363388	0.472548		0.136092	0.366377	3.12733	0.319761	0.0388891		2.60999e-05	0.000508732	0.0391435	0.156706
						0.365921	0	3.5986	0.277886	0.0360895		0.000472268	0.00045683	0.036318	3.15769		-0.365921	0	3.12045	0.320466	0.0360895		6.77812e-05	0.00045683	0.036318	0.4532		-0.00477373	0.365921	3.13117	0.319369	0.0365787		7.43356e-05	0.000480504	0.0368189	0.472536		0.136316	0.365921	3.12708	0.319787	0.0393979		2.61029e-05	0.000508794	0.0396523	0.156705
						0.365464	0	3.59249	0.278358	0.0365464		0.000472268	0.00045683	0.0367748	3.15769		-0.365464	0	3.11979	0.320534	0.0365464		6.77812e-05	0.00045683	0.0367748	0.4532		-0.00492269	0.365464	3.13044	0.319444	0.0370592		7.49464e-05	0.000481245	0.0372998	0.475686		0.13654	0.365464	3.12682	0.319813	0.0399067		2.61059e-05	0.000508857	0.0401611	0.156703
						0.365007	0	3.58641	0.278831	0.0370032		0.000472268	0.00045683	0.0372316	3.15769		-0.365007	0	3.11914	0.320602	0.0370032		6.77812e-05	0.00045683	0.0372316	0.4532		-0.00507403	0.365007	3.12971	0.319519	0.0375404		7.61333e-05	0.000482024	0.0377815	0.482438		0.136764	0.365007	3.12657	0.319839	0.0404155		2.6109e-05	0.000508922	0.04067	0.156702
						0.36455	0	3.58034	0.279303	0.03746		0.000472268	0.00045683	0.0376884	3.15769		-0.36455	0	3.11848	0.320669	0.03746		6.77812e-05	0.00045683	0.0376884	0.4532		-0.00522783	0.36455	3.12896	0.319595	0.0380225		7.62788e-05	0.000482844	0.0382639	0.482539		0.136988	0.36455	3.12631	0.319866	0.0409245		2.61122e-05	0.000508988	0.0411789	0.156701
						0.364093	0	3.5743	0.279775	0.0379169		0.000472268	0.00045683	0.0381453	3.15769		-0.364093	0	3.11782	0.320737	0.0379169		6.77812e-05	0.00045683	0.0381453	0.4532		-0.00538418	0.364093	3.12822	0.319671	0.0385053		7.643e-05	0.000483709	0.0387472	0.482631		0.137213	0.364093	3.12606	0.319892	0.0414334		2.61154e-05	0.000509057	0.041688	0.156699
						0.363636	0	3.56828	0.280247	0.0383737		0.000472268	0.00045683	0.0386021	3.15769		-0.363636	0	3.11716	0.320805	0.0383737		6.77812e-05	0.00045683	0.0386021	0.4532		-0.00554318	0.363636	3.12747	0.319748	0.038989		7.6587e-05	0.000484621	0.0392313	0.482712		0.137438	0.363636	3.1258	0.319918	0.0419425		2.61188e-05	0.000509127	0.0421971	0.156698
						0.36318	0	3.56227	0.28072	0.0388305		0.000472268	0.00045683	0.0390589	3.15769		-0.36318	0	3.1165	0.320873	0.0388305		6.77812e-05	0.00045683	0.0390589	0.4532		-0.00570493	0.36318	3.12672	0.319824	0.0394736		7.67503e-05	0.000485584	0.0397164	0.482781		0.137662	0.36318	3.12555	0.319944	0.0424516		2.61222e-05	0.000509199	0.0427062	0.156696
						0.362723	0	3.55629	0.281192	0.0392873		0.000472268	0.00045683	0.0395158	3.15769		-0.362723	0	3.11584	0.320941	0.0392873		6.77812e-05	0.00045683	0.0395158	0.4532		-0.00586955	0.362723	3.12597	0.319901	0.0399592		7.37593e-05	0.000486603	0.0402025	0.462996		0.137887	0.362723	3.12529	0.31997	0.0429608		2.61258e-05	0.000509273	0.0432155	0.156694
						0.362266	0	3.55033	0.281664	0.0397442		0.000472268	0.00045683	0.0399726	3.15769		-0.362266	0	3.11518	0.321008	0.0397442		6.77812e-05	0.00045683	0.0399726	0.4532		-0.00603715	0.362266	3.12525	0.319975	0.0404458		7.35246e-05	0.000487682	0.0406897	0.460501		0.138112	0.362266	3.12504	0.319996	0.0434701		2.61294e-05	0.000509349	0.0437248	0.156693
						0.361809	0	3.54438	0.282136	0.040201		0.00039058	0.00045683	0.0404294	2.61151		-0.361809	0	3.11453	0.321076	0.040201		5.41829e-05	0.00045683	0.0404294	0.362279		-0.00620786	0.361809	3.12453	0.320048	0.0409335		6.28146e-05	0.000488827	0.0411779	0.392501		0.138338	0.361809	3.12478	0.320022	0.0439794		2.25223e-05	0.000509427	0.0442342	0.135041
						0.361352	0	3.53948	0.282527	0.0406578		0.00039058	0.00045683	0.0408862	2.61151		-0.361352	0	3.114	0.32113	0.0406578		5.41829e-05	0.00045683	0.0408862	0.362279		-0.00638181	0.361352	3.12392	0.320111	0.0414223		6.29415e-05	0.000489712	0.0416672	0.392583		0.138563	0.361352	3.12456	0.320045	0.0444889		2.25251e-05	0.000509487	0.0447436	0.135042
						0.360895	0	3.5346	0.282918	0.0411147		0.00039058	0.00045683	0.0413431	2.61151		-0.360895	0	3.11348	0.321185	0.0411147		5.41829e-05	0.00045683	0.0413431	0.362279		-0.00655823	0.360895	3.1233	0.320174	0.041912		6.30724e-05	0.000490637	0.0421574	0.392658		0.138789	0.360895	3.12434	0.320067	0.0449984		2.2528e-05	0.000509547	0.0452531	0.135044
						0.360439	0	3.52973	0.283308	0.0415715		0.00039058	0.00045683	0.0417999	2.61151		-0.360439	0	3.11295	0.321239	0.0415715		5.41829e-05	0.00045683	0.0417999	0.362279		-0.0067372	0.360439	3.12269	0.320237	0.0424027		6.32075e-05	0.000491603	0.0426485	0.392726		0.139014	0.360439	3.12412	0.32009	0.0455079		2.25309e-05	0.000509609	0.0457627	0.135045
						0.359982	0	3.52487	0.283699	0.0420283		0.00039058	0.00045683	0.0422567	2.61151		-0.359982	0	3.11242	0.321293	0.0420283		5.41829e-05	0.00045683	0.0422567	0.362279		-0.00691881	0.359982	3.12207	0.3203	0.0428943		6.3347e-05	0.000492614	0.0431406	0.392785		0.13924	0.359982	3.1239	0.320112	0.0460175		2.25339e-05	0.000509672	0.0462724	0.135046
						0.359525	0	3.52002	0.284089	0.0424852		0.00039058	0.00045683	0.0427136	2.61151		-0.359525	0	3.1119	0.321347	0.0424852		5.41829e-05	0.00045683	0.0427136	0.362279		-0.00710313	0.359525	3.12145	0.320364	0.0433869		6.34912e-05	0.000493672	0.0436337	0.392836		0.139466	0.359525	3.12368	0.320135	0.0465272		2.2537e-05	0.000509735	0.0467821	0.135047
						0.359068	0	3.51519	0.28448	0.042942		0.00039058	0.00045683	0.0431704	2.61151		-0.359068	0	3.11138	0.321401	0.042942		5.41829e-05	0.00045683	0.0431704	0.362279		-0.00729026	0.359068	3.12084	0.320427	0.0438806		6.07727e-05	0.00049478	0.044128	0.375173		0.139692	0.359068	3.12346	0.320158	0.0470369		2.25401e-05	0.000509801	0.0472918	0.135049
						0.358611	0	3.51037	0.28487	0.0433988		0.00039058	0.00045683	0.0436272	2.61151		-0.358611	0	3.11085	0.321455	0.0433988		5.41829e-05	0.00045683	0.0436272	0.362279		-0.0074803	0.358611	3.12024	0.320488	0.0443754		6.08265e-05	0.000495943	0.0446233	0.374625		0.139919	0.358611	3.12324	0.32018	0.0475467		2.25432e-05	0.000509867	0.0478017	0.13505
						0.358154	0	3.50556	0.285261	0.0438556		0.00039058	0.00045683	0.0440841	2.61151		-0.358154	0	3.11033	0.32151	0.0438556		5.41829e-05	0.00045683	0.0440841	0.362279		-0.00767334	0.358154	3.11965	0.320549	0.0448713		6.09721e-05	0.000497163	0.0451199	0.3746		0.140145	0.358154	3.12302	0.320203	0.0480566		2.25464e-05	0.000509934	0.0483116	0.135051
						0.357698	0	3.50077	0.285652	0.0443125		0.00039058	0.00045683	0.0445409	2.61151		-0.357698	0	3.1098	0.321564	0.0443125		5.41829e-05	0.00045683	0.0445409	0.362279		-0.0078695	0.357698	3.11906	0.32061	0.0453685		6.1123e-05	0.000498445	0.0456177	0.374561		0.140372	0.357698	3.1228	0.320225	0.0485665		2.25497e-05	0.000510003	0.0488215	0.135052
						0.357241	0	3.49599	0.286042	0.0447693		0.00039058	0.00045683	0.0449977	2.61151		-0.357241	0	3.10928	0.321618	0.0447693		5.41829e-05	0.00045683	0.0449977	0.362279		-0.00806888	0.357241	3.11846	0.320671	0.0458669		6.12796e-05	0.000499794	0.0461168	0.374507		0.140598	0.357241	3.12258	0.320248	0.0490765		2.22297e-05	0.000510073	0.0493316	0.133118
						0.356784	0	3.49122	0.286433	0.0452261		0.000328303	0.00045683	0.0454545	2.19511		-0.356784	0	3.10876	0.321672	0.0452261		4.4224e-05	0.00045683	0.0454545	0.295692		-0.00827162	0.356784	3.11787	0.320732	0.0463667		5.3637e-05	0.000501214	0.0466173	0.326871		0.140825	0.356784	3.12237	0.32027	0.0495866		1.92604e-05	0.00051013	0.0498417	0.115324
						0.356327	0	3.48722	0.286761	0.045683		0.000328303	0.00045683	0.0459114	2.19511		-0.356327	0	3.10833	0.321716	0.045683		4.4224e-05	0.00045683	0.0459114	0.295692		-0.00847783	0.356327	3.11735	0.320786	0.0468679		5.37667e-05	0.000502362	0.0471191	0.326913		0.141052	0.356327	3.12218	0.320289	0.0500967		1.95625e-05	0.000510169	0.0503518	0.117124
						0.35587	0	3.48324	0.287089	0.0461398		0.000328303	0.00045683	0.0463682	2.19511		-0.35587	0	3.1079	0.321761	0.0461398		4.4224e-05	0.00045683	0.0463682	0.295692		-0.00868681	0.35587	3.11682	0.320839	0.0473703		5.30792e-05	0.000503557	0.0476221	0.321967		0.141279	0.35587	3.12199	0.320309	0.0506069		1.95639e-05	0.000510208	0.050862	0.117123
						0.355413	0	3.47926	0.287418	0.0465966		0.000328303	0.00045683	0.046825	2.19511		-0.355413	0	3.10747	0.321805	0.0465966		4.4224e-05	0.00045683	0.046825	0.295692		-0.00889865	0.355413	3.11631	0.320892	0.0478738		5.15186e-05	0.000504801	0.0481262	0.311731		0.141507	0.355413	3.1218	0.320328	0.0511171		1.95653e-05	0.000510248	0.0513722	0.117123
						0.354957	0	3.47529	0.287746	0.0470534		0.000328303	0.00045683	0.0472819	2.19511		-0.354957	0	3.10705	0.321849	0.0470534		4.4224e-05	0.00045683	0.0472819	0.295692		-0.00911343	0.354957	3.11581	0.320944	0.0483786		5.16489e-05	0.000506097	0.0486317	0.311719		0.141734	0.354957	3.12161	0.320348	0.0516274		1.95668e-05	0.000510288	0.0518825	0.117122
						0.3545	0	3.47133	0.288074	0.0475103		0.000328303	0.00045683	0.0477387	2.19511		-0.3545	0	3.10662	0.321893	0.0475103		4.4224e-05	0.00045683	0.0477387	0.295692		-0.00933124	0.3545	3.11531	0.320996	0.0488847		5.17832e-05	0.000507448	0.0491385	0.311697		0.141961	0.3545	3.12142	0.320367	0.0521376		1.95682e-05	0.000510328	0.0523928	0.117122
						0.354043	0	3.46738	0.288403	0.0479671		0.000328303	0.00045683	0.0481955	2.19511		-0.354043	0	3.10619	0.321938	0.0479671		4.4224e-05	0.00045683	0.0481955	0.295692		-0.00955217	0.354043	3.1148	0.321047	0.0493922		5.19216e-05	0.000508858	0.0496466	0.311664		0.142189	0.354043	3.12123	0.320387	0.052648		1.95697e-05	0.000510369	0.0529032	0.117121
						0.353586	0	3.46343	0.288731	0.0484239		0.000328303	0.00045683	0.0486524	2.19511		-0.353586	0	3.10577	0.321982	0.0484239		4.4224e-05	0.00045683	0.0486524	0.295692		-0.00977632	0.353586	3.1143	0.321099	0.049901		5.20646e-05	0.00051033	0.0501562	0.311621		0.142416	0.353586	3.12103	0.320407	0.0531583		1.95711e-05	0.00051041	0.0534135	0.11712
						0.353129	0	3.4595	0.289059	0.0488808		0.000328303	0.00045683	0.0491092	2.19511		-0.353129	0	3.10534	0.322026	0.0488808		4.4224e-05	0.00045683	0.0491092	0.295692		-0.0100038	0.353129	3.1138	0.321151	0.0504114		5.34792e-05	0.000511869	0.0506673	0.319125		0.142644	0.353129	3.12084	0.320426	0.0536688		1.95726e-05	0.000510451	0.053924	0.11712
						0.352672	0	3.45557	0.289388	0.0493376		0.000328303	0.00045683	0.049566	2.19511		-0.352672	0	3.10491	0.32207	0.0493376		4.4224e-05	0.00045683	0.049566	0.295692		-0.0102347	0.352672	3.11328	0.321205	0.0509232		5.39744e-05	0.000513471	0.05118	0.321076		0.142872	0.352672	3.12065	0.320446	0.0541792		1.95741e-05	0.000510493	0.0544345	0.117119
						0.352216	0	3.45166	0.289716	0.0497944		0.000328303	0.00045683	0.0500228	2.19511		-0.352216	0	3.10449	0.322114	0.0497944		4.4224e-05	0.00045683	0.0500228	0.295692		-0.0104691	0.352216	3.11275	0.321259	0.0514367		5.12675e-05	0.000515146	0.0516943	0.303982		0.143099	0.352216	3.12046	0.320465	0.0546897		1.95756e-05	0.000510535	0.054945	0.117118
						0.351759	0	3.44775	0.290044	0.0502513		0.000279671	0.00045683	0.0504797	1.86994		-0.351759	0	3.10406	0.322159	0.0502513		3.67009e-05	0.00045683	0.0504797	0.245391		-0.0107072	0.351759	3.11226	0.32131	0.0519519		4.60722e-05	0.000516902	0.0522103	0.272249		0.143327	0.351759	3.12027	0.320485	0.0552002		1.69602e-05	0.000510578	0.0554555	0.101462
						0.351302	0	3.44443	0.290324	0.0507081		0.000279671	0.00045683	0.0509365	1.86994		-0.351302	0	3.10371	0.322195	0.0507081		3.67009e-05	0.00045683	0.0509365	0.245391		-0.0109491	0.351302	3.11181	0.321356	0.0524688		4.62143e-05	0.000518371	0.0527279	0.272315		0.143555	0.351302	3.12011	0.320502	0.0557108		1.69619e-05	0.000510625	0.0559661	0.101463
						0.350845	0	3.44112	0.290603	0.0511649		0.000279671	0.00045683	0.0513933	1.86994		-0.350845	0	3.10335	0.322232	0.0511649		3.67009e-05	0.00045683	0.0513933	0.245391		-0.011194	0.350845	3.11136	0.321402	0.0529871		4.63603e-05	0.000519896	0.0532471	0.272374		0.143784	0.350845	3.11994	0.320519	0.0562214		1.69635e-05	0.000510672	0.0564768	0.101463
						0.350388	0	3.43781	0.290883	0.0516217		0.000279671	0.00045683	0.0518502	1.86994		-0.350388	0	3.103	0.322269	0.0516217		3.67009e-05	0.00045683	0.0518502	0.245391		-0.0114422	0.350388	3.11092	0.321449	0.053507		4.65105e-05	0.000521481	0.0537678	0.272426		0.144012	0.350388	3.11978	0.320536	0.0567321		1.69652e-05	0.000510719	0.0569875	0.101464
						0.349931	0	3.4345	0.291163	0.0520786		0.000279671	0.00045683	0.052307	1.86994		-0.349931	0	3.10265	0.322305	0.0520786		3.67009e-05	0.00045683	0.052307	0.245391		-0.0116937	0.349931	3.11047	0.321495	0.0540285		4.66651e-05	0.000523128	0.0542901	0.272471		0.14424	0.349931	3.11961	0.320553	0.0572428		1.69669e-05	0.000510767	0.0574982	0.101465
						0.349475	0	3.43121	0.291442	0.0525354		0.000279671	0.00045683	0.0527638	1.86994		-0.349475	0	3.10229	0.322342	0.0525354		3.67009e-05	0.00045683	0.0527638	0.245391		-0.0119486	0.349475	3.11001	0.321542	0.0545516		4.68241e-05	0.000524841	0.054814	0.272507		0.144469	0.349475	3.11945	0.32057	0.0577536		1.69686e-05	0.000510814	0.058009	0.101466
						0.349018	0	3.42792	0.291722	0.0529922		0.000279671	0.00045683	0.0532206	1.86994		-0.349018	0	3.10194	0.322379	0.0529922		3.67009e-05	0.00045683	0.0532206	0.245391		-0.012207	0.349018	3.10956	0.321589	0.0550765		4.48454e-05	0.000526623	0.0553398	0.260108		0.144697	0.349018	3.11928	0.320587	0.0582644		1.69703e-05	0.000510862	0.0585198	0.101466
						0.348561	0	3.42464	0.292002	0.0534491		0.000279671	0.00045683	0.0536775	1.86994		-0.348561	0	3.10159	0.322416	0.0534491		3.67009e-05	0.00045683	0.0536775	0.245391		-0.012469	0.348561	3.10913	0.321634	0.0556031		4.45393e-05	0.000528479	0.0558673	0.257425		0.144926	0.348561	3.11912	0.320604	0.0587753		1.6972e-05	0.000510909	0.0590307	0.101467
						0.348104	0	3.42136	0.292281	0.0539059		0.000279671	0.00045683	0.0541343	1.86994		-0.348104	0	3.10123	0.322452	0.0539059		3.67009e-05	0.00045683	0.0541343	0.245391		-0.0127347	0.348104	3.1087	0.321678	0.0561316		4.46994e-05	0.000530413	0.0563968	0.257409		0.145155	0.348104	3.11895	0.320621	0.0592862		1.69737e-05	0.000510957	0.0595417	0.101468
						0.347647	0	3.41809	0.292561	0.0543627		0.000279671	0.00045683	0.0545911	1.86994		-0.347647	0	3.10088	0.322489	0.0543627		3.67009e-05	0.00045683	0.0545911	0.245391		-0.0130042	0.347647	3.10827	0.321723	0.056662		4.48646e-05	0.00053243	0.0569282	0.257382		0.145383	0.347647	3.11879	0.320638	0.0597971		1.69754e-05	0.000511005	0.0600526	0.101468
						0.34719	0	3.41482	0.292841	0.0548196		0.000279671	0.00045683	0.055048	1.86994		-0.34719	0	3.10053	0.322526	0.0548196		3.67009e-05	0.00045683	0.055048	0.245391		-0.0132777	0.34719	3.10783	0.321768	0.0571944		4.50352e-05	0.000534533	0.0574617	0.257343		0.145612	0.34719	3.11862	0.320655	0.0603081		1.67651e-05	0.000511053	0.0605637	0.100202
						0.346734	0	3.41157	0.29312	0.0552764		0.000240938	0.00045683	0.0555048	1.61096		-0.346734	0	3.10018	0.322562	0.0552764		3.08724e-05	0.00045683	0.0555048	0.20642		-0.0135552	0.346734	3.1074	0.321813	0.0577289		4.12682e-05	0.00053673	0.0579973	0.234852		0.145841	0.346734	3.11846	0.320671	0.0608192		1.45588e-05	0.000511086	0.0610747	0.0870093
						0.346277	0	3.40876	0.293361	0.0557332		0.000240938	0.00045683	0.0559616	1.61096		-0.346277	0	3.09988	0.322593	0.0557332		3.08724e-05	0.00045683	0.0559616	0.20642		-0.013837	0.346277	3.107	0.321854	0.0582657		4.14187e-05	0.000538626	0.058535	0.234879		0.146071	0.346277	3.11832	0.320686	0.0613303		1.47827e-05	0.000511116	0.0615858	0.0883424
						0.34582	0	3.40597	0.293602	0.05619		0.000240938	0.00045683	0.0564185	1.61096		-0.34582	0	3.09958	0.322624	0.05619		3.08724e-05	0.00045683	0.0564185	0.20642		-0.0141223	0.34582	3.1066	0.321895	0.0588043		3.94264e-05	0.000540591	0.0590746	0.222768		0.1463	0.34582	3.11817	0.320701	0.0618414		1.47835e-05	0.000511146	0.062097	0.088342
						0.345363	0	3.40317	0.293843	0.0566469		0.000240938	0.00045683	0.0568753	1.61096		-0.345363	0	3.09929	0.322655	0.0566469		3.08724e-05	0.00045683	0.0568753	0.20642		-0.0144114	0.345363	3.10622	0.321935	0.0593449		3.9454e-05	0.000542629	0.0596162	0.222087		0.146529	0.345363	3.11803	0.320715	0.0623525		1.47843e-05	0.000511175	0.0626081	0.0883417
						0.344906	0	3.40039	0.294084	0.0571037		0.000240938	0.00045683	0.0573321	1.61096		-0.344906	0	3.09899	0.322686	0.0571037		3.08724e-05	0.00045683	0.0573321	0.20642		-0.0147042	0.344906	3.10584	0.321974	0.0598875		3.96054e-05	0.000544743	0.0601599	0.222074		0.146759	0.344906	3.11789	0.32073	0.0628637		1.4785e-05	0.000511203	0.0631193	0.0883413
						0.34445	0	3.3976	0.294325	0.0575605		0.000240938	0.00045683	0.0577889	1.61096		-0.34445	0	3.09869	0.322717	0.0575605		3.08724e-05	0.00045683	0.0577889	0.20642		-0.015001	0.34445	3.10546	0.322014	0.0604323		4.08235e-05	0.000546937	0.0607057	0.227986		0.146988	0.34445	3.11774	0.320745	0.0633749		1.47858e-05	0.000511232	0.0636305	0.088341
						0.343993	0	3.39482	0.294566	0.0580174		0.000240938	0.00045683	0.0582458	1.61096		-0.343993	0	3.0984	0.322748	0.0580174		3.08724e-05	0.00045683	0.0582458	0.20642		-0.0153017	0.343993	3.10506	0.322055	0.0609792		4.13508e-05	0.000549196	0.0612538	0.229981		0.147217	0.343993	3.1176	0.32076	0.0638862		1.47865e-05	0.000511259	0.0641418	0.0883407
						0.343536	0	3.39205	0.294807	0.0584742		0.000240938	0.00045683	0.0587026	1.61096		-0.343536	0	3.0981	0.322778	0.0584742		3.08724e-05	0.00045683	0.0587026	0.20642		-0.0156065	0.343536	3.10466	0.322096	0.0615284		4.15335e-05	0.000551537	0.0618042	0.230017		0.147447	0.343536	3.11745	0.320775	0.0643974		1.47873e-05	0.000511286	0.0646531	0.0883403
						0.343079	0	3.38928	0.295048	0.058931		0.000240938	0.00045683	0.0591594	1.61096		-0.343079	0	3.0978	0.322809	0.058931		3.08724e-05	0.00045683	0.0591594	0.20642		-0.0159156	0.343079	3.10426	0.322138	0.0620799		4.09181e-05	0.000553972	0.0623569	0.225612		0.147677	0.343079	3.11731	0.320789	0.0649087		1.4788e-05	0.000511312	0.0651644	0.08834
						0.342622	0	3.38651	0.295289	0.0593878		0.000240938	0.00045683	0.0596163	1.61096		-0.342622	0	3.09751	0.32284	0.0593878		3.08724e-05	0.00045683	0.0596163	0.20642		-0.0162289	0.342622	3.10387	0.322179	0.0626339		3.93207e-05	0.000556507	0.0629122	0.215817		0.147906	0.342622	3.11717	0.320804	0.06542		1.47887e-05	0.000511338	0.0656757	0.0883397
						0.342165	0	3.38375	0.29553	0.0598447		0.000240938	0.00045683	0.0600731	1.61096		-0.342165	0	3.09721	0.322871	0.0598447		3.08724e-05	0.00045683	0.0600731	0.20642		-0.0165467	0.342165	3.10349	0.322218	0.0631904		3.95054e-05	0.000559146	0.06347	0.215808		0.148136	0.342165	3.11702	0.320819	0.0659313		1.47893e-05	0.000511363	0.066187	0.0883394
						0.341709	0	3.381	0.295771	0.0603015		0.000209573	0.00045683	0.0605299	1.40125		-0.341709	0	3.09692	0.322902	0.0603015		2.6261e-05	0.00045683	0.0605299	0.175587		-0.0168692	0.341709	3.10311	0.322257	0.0637496		3.69947e-05	0.000561895	0.0640305	0.201103		0.148366	0.341709	3.11688	0.320834	0.0664427		1.27885e-05	0.000511387	0.0666984	0.0763844
						0.341252	0	3.3786	0.29598	0.0607583		0.000209573	0.00045683	0.0609868	1.40125		-0.341252	0	3.09666	0.322928	0.0607583		2.6261e-05	0.00045683	0.0609868	0.175587		-0.0171963	0.341252	3.10275	0.322294	0.0643115		3.71619e-05	0.000564329	0.0645936	0.201141		0.148596	0.341252	3.11676	0.320847	0.0669541		1.27896e-05	0.000511427	0.0672098	0.0763848
						0.340795	0	3.37621	0.29619	0.0612152		0.000209573	0.00045683	0.0614436	1.40125		-0.340795	0	3.09641	0.322954	0.0612152		2.6261e-05	0.00045683	0.0614436	0.175587		-0.0175276	0.340795	3.1024	0.322332	0.0648758		3.73337e-05	0.000566851	0.0651592	0.201172		0.148826	0.340795	3.11663	0.320859	0.0674655		1.27906e-05	0.000511467	0.0677213	0.0763853
						0.340338	0	3.37382	0.2964	0.061672		0.000209573	0.00045683	0.0619004	1.40125		-0.340338	0	3.09616	0.322981	0.061672		2.6261e-05	0.00045683	0.0619004	0.175587		-0.0178632	0.340338	3.10204	0.322369	0.0654426		3.75103e-05	0.000569465	0.0657274	0.201196		0.149056	0.340338	3.11651	0.320872	0.067977		1.27917e-05	0.000511505	0.0682327	0.0763857
						0.339881	0	3.37144	0.296609	0.0621288		0.000209573	0.00045683	0.0623572	1.40125		-0.339881	0	3.09591	0.323007	0.0621288		2.6261e-05	0.00045683	0.0623572	0.175587		-0.0182032	0.339881	3.10168	0.322406	0.0660121		3.56216e-05	0.000572174	0.0662982	0.190161		0.149286	0.339881	3.11638	0.320885	0.0684885		1.27927e-05	0.000511543	0.0687443	0.0763861
						0.339424	0	3.36906	0.296819	0.0625857		0.000209573	0.00045683	0.0628141	1.40125		-0.339424	0	3.09566	0.323033	0.0625857		2.6261e-05	0.00045683	0.0628141	0.175587		-0.0185477	0.339424	3.10133	0.322442	0.0665843		3.55971e-05	0.000574985	0.0668718	0.189101		0.149516	0.339424	3.11626	0.320898	0.069		1.27937e-05	0.000511581	0.0692558	0.0763865
						0.338968	0	3.36668	0.297028	0.0630425		0.000209573	0.00045683	0.0632709	1.40125		-0.338968	0	3.09541	0.32306	0.0630425		2.6261e-05	0.00045683	0.0632709	0.175587		-0.0188969	0.338968	3.10099	0.322478	0.0671593		3.57757e-05	0.000577902	0.0674482	0.18909		0.149746	0.338968	3.11613	0.32091	0.0695116		1.27947e-05	0.000511617	0.0697674	0.0763869
						0.338511	0	3.36431	0.297238	0.0634993		0.000209573	0.00045683	0.0637277	1.40125		-0.338511	0	3.09515	0.323086	0.0634993		2.6261e-05	0.00045683	0.0637277	0.175587		-0.0192508	0.338511	3.10065	0.322513	0.0677372		3.59596e-05	0.000580931	0.0680276	0.189071		0.149976	0.338511	3.11601	0.320923	0.0700232		1.27956e-05	0.000511653	0.0702791	0.0763873
						0.338054	0	3.36194	0.297447	0.0639561		0.000209573	0.00045683	0.0641846	1.40125		-0.338054	0	3.0949	0.323112	0.0639561		2.6261e-05	0.00045683	0.0641846	0.175587		-0.0196097	0.338054	3.1003	0.322549	0.0683181		3.61489e-05	0.000584078	0.0686101	0.189043		0.150207	0.338054	3.11589	0.320936	0.0705349		1.27965e-05	0.000511687	0.0707907	0.0763877
						0.337597	0	3.35957	0.297657	0.064413		0.000209573	0.00045683	0.0646414	1.40125		-0.337597	0	3.09465	0.323138	0.064413		2.6261e-05	0.00045683	0.0646414	0.175587		-0.0199737	0.337597	3.09995	0.322586	0.0689022		3.72826e-05	0.000587348	0.0691958	0.193886		0.150437	0.337597	3.11576	0.320949	0.0710466		1.27975e-05	0.000511721	0.0713024	0.0763881
						0.33714	0	3.35721	0.297867	0.0648698		0.000209573	0.00045683	0.0650982	1.40125		-0.33714	0	3.0944	0.323165	0.0648698		2.6261e-05	0.00045683	0.0650982	0.175587		-0.0203428	0.33714	3.0996	0.322623	0.0694895		3.61284e-05	0.000590715	0.0697849	0.186813		0.150668	0.33714	3.11564	0.320962	0.0715583		1.25973e-05	0.000511754	0.0718142	0.0751886
						0.336683	0	3.35485	0.298076	0.0653266		0.000183814	0.00045683	0.065555	1.22902		-0.336683	0	3.09415	0.323191	0.0653266		2.25471e-05	0.00045683	0.065555	0.150755		-0.0207173	0.336683	3.09925	0.322659	0.0700802		3.38393e-05	0.000594201	0.0703773	0.17395		0.150899	0.336683	3.11551	0.320974	0.0720701		1.08725e-05	0.000511767	0.0723259	0.0648923
						0.336227	0	3.35278	0.29826	0.0657835		0.000183814	0.00045683	0.0660119	1.22902		-0.336227	0	3.09393	0.323213	0.0657835		2.25471e-05	0.00045683	0.0660119	0.150755		-0.0210973	0.336227	3.09892	0.322693	0.0706744		3.40272e-05	0.000597359	0.0709731	0.173991		0.151129	0.336227	3.11541	0.320985	0.0725818		1.11107e-05	0.000511788	0.0728377	0.0663111
						0.33577	0	3.35072	0.298444	0.0662403		0.000183814	0.00045683	0.0664687	1.22902		-0.33577	0	3.09372	0.323236	0.0662403		2.25471e-05	0.00045683	0.0664687	0.150755		-0.0214822	0.33577	3.0986	0.322727	0.0712718		3.42204e-05	0.000600631	0.0715721	0.174025		0.15136	0.33577	3.1153	0.320996	0.0730936		1.11111e-05	0.000511807	0.0733495	0.066311
						0.335313	0	3.34865	0.298628	0.0666971		0.000183814	0.00045683	0.0669255	1.22902		-0.335313	0	3.0935	0.323258	0.0666971		2.25471e-05	0.00045683	0.0669255	0.150755		-0.0218722	0.335313	3.09827	0.322761	0.0718724		3.44191e-05	0.000604023	0.0721744	0.174053		0.151591	0.335313	3.11519	0.321007	0.0736054		1.11114e-05	0.000511825	0.0738613	0.0663108
						0.334856	0	3.34659	0.298811	0.067154		0.000183814	0.00045683	0.0673824	1.22902		-0.334856	0	3.09328	0.323281	0.067154		2.25471e-05	0.00045683	0.0673824	0.150755		-0.0222673	0.334856	3.09794	0.322795	0.0724764		3.46237e-05	0.000607541	0.0727802	0.174074		0.151822	0.334856	3.11509	0.321018	0.0741172		1.11118e-05	0.000511842	0.0743732	0.0663106
						0.334399	0	3.34454	0.298995	0.0676108		0.000183814	0.00045683	0.0678392	1.22902		-0.334399	0	3.09307	0.323304	0.0676108		2.25471e-05	0.00045683	0.0678392	0.150755		-0.0226678	0.334399	3.09761	0.32283	0.073084		3.30575e-05	0.000611191	0.0733896	0.165207		0.152052	0.334399	3.11498	0.32103	0.0746291		1.11121e-05	0.000511857	0.074885	0.0663105
						0.333942	0	3.34248	0.299179	0.0680676		0.000183814	0.00045683	0.068296	1.22902		-0.333942	0	3.09285	0.323326	0.0680676		2.25471e-05	0.00045683	0.068296	0.150755		-0.0230739	0.333942	3.09729	0.322863	0.0736952		3.28122e-05	0.000614981	0.0740027	0.162971		0.152283	0.333942	3.11487	0.321041	0.0751409		1.11124e-05	0.00051187	0.0753969	0.0663103
						0.333486	0	3.34043	0.299363	0.0685244		0.000183814	0.00045683	0.0687529	1.22902		-0.333486	0	3.09264	0.323349	0.0685244		2.25471e-05	0.00045683	0.0687529	0.150755		-0.0234856	0.333486	3.09697	0.322896	0.0743102		3.30208e-05	0.000618917	0.0746196	0.162963		0.152514	0.333486	3.11476	0.321052	0.0756528		1.11126e-05	0.000511882	0.0759088	0.0663102
						0.333029	0	3.33838	0.299547	0.0689813		0.000183814	0.00045683	0.0692097	1.22902		-0.333029	0	3.09242	0.323371	0.0689813		2.25471e-05	0.00045683	0.0692097	0.150755		-0.0239031	0.333029	3.09666	0.322929	0.0749291		3.32358e-05	0.000623008	0.0752406	0.162948		0.152745	0.333029	3.11465	0.321063	0.0761647		1.11128e-05	0.000511893	0.0764206	0.0663101
						0.332572	0	3.33633	0.29973	0.0694381		0.000183814	0.00045683	0.0696665	1.22902		-0.332572	0	3.09221	0.323394	0.0694381		2.25471e-05	0.00045683	0.0696665	0.150755		-0.0243268	0.332572	3.09634	0.322962	0.0755521		3.34577e-05	0.000627262	0.0758657	0.162923		0.152976	0.332572	3.11455	0.321074	0.0766766		1.1113e-05	0.000511901	0.0769325	0.06631
						0.332115	0	3.33429	0.299914	0.0698949		0.000183814	0.00045683	0.0701233	1.22902		-0.332115	0	3.09199	0.323416	0.0698949		2.25471e-05	0.00045683	0.0701233	0.150755		-0.0247566	0.332115	3.09602	0.322996	0.0761793		3.37185e-05	0.000631687	0.0764952	0.163043		0.153207	0.332115	3.11444	0.321085	0.0771885		1.11131e-05	0.000511908	0.0774444	0.06631
						0.331658	0	3.33224	0.300098	0.0703518		0.000162402	0.00045683	0.0705802	1.08585		-0.331658	0	3.09177	0.323439	0.0703518		1.951e-05	0.00045683	0.0705802	0.130448		-0.0251929	0.331658	3.09569	0.323029	0.076811		3.16431e-05	0.000636279	0.0771292	0.151903		0.153438	0.331658	3.11433	0.321096	0.0777004		9.51657e-06	0.000511913	0.0779563	0.0567832
						0.331201	0	3.33044	0.30026	0.0708086		0.000162402	0.00045683	0.071037	1.08585		-0.331201	0	3.09159	0.323458	0.0708086		1.951e-05	0.00045683	0.071037	0.130448		-0.0256358	0.331201	3.09539	0.323061	0.0774473		3.18591e-05	0.00064046	0.0777675	0.151942		0.153669	0.331201	3.11424	0.321106	0.0782123		9.51709e-06	0.000511939	0.0784683	0.0567834
						0.330745	0	3.32864	0.300423	0.0712654		0.000162402	0.00045683	0.0714938	1.08585		-0.330745	0	3.0914	0.323478	0.0712654		1.951e-05	0.00045683	0.0714938	0.130448		-0.0260847	0.330745	3.09509	0.323093	0.0780878		3.20816e-05	0.000644797	0.0784102	0.151974		0.1539	0.330745	3.11415	0.321115	0.0787242		9.51757e-06	0.000511963	0.0789802	0.0567836
						0.330288	0	3.32684	0.300585	0.0717222		0.000162402	0.00045683	0.0719507	1.08585		-0.330288	0	3.09122	0.323497	0.0717222		1.951e-05	0.00045683	0.0719507	0.130448		-0.0265397	0.330288	3.09478	0.323125	0.0787326		3.19904e-05	0.000642857	0.079054	0.151999		0.154131	0.330288	3.11405	0.321125	0.0792362		9.51802e-06	0.000511985	0.0794922	0.0567838
						0.329831	0	3.32505	0.300748	0.0721791		0.000162402	0.00045683	0.0724075	1.08585		-0.329831	0	3.09103	0.323517	0.0721791		1.951e-05	0.00045683	0.0724075	0.130448		-0.0269965	0.329836	3.09447	0.323157	0.0793754		3.17752e-05	0.000638457	0.0796947	0.152017		0.154362	0.329831	3.11396	0.321134	0.0797482		9.51844e-06	0.000512006	0.0800042	0.056784
						0.329374	0	3.32325	0.30091	0.0726359		0.000162402	0.00045683	0.0728643	1.08585		-0.329374	0	3.09084	0.323536	0.0726359		1.951e-05	0.00045683	0.0728643	0.130448		-0.0274534	0.329389	3.09417	0.323189	0.0800139		3.04784e-05	0.000634135	0.080331	0.146807		0.154594	0.329374	3.11387	0.321144	0.0802602		9.51881e-06	0.000512025	0.0805162	0.0567842
						0.328917	0	3.32146	0.301072	0.0730927		0.000162402	0.00045683	0.0733212	1.08585		-0.328917	0	3.09066	0.323556	0.0730927		1.951e-05	0.00045683	0.0733212	0.130448		-0.0279102	0.32895	3.09388	0.323219	0.080648		2.92896e-05	0.000629891	0.080963	0.142031		0.154825	0.328917	3.11378	0.321153	0.0807722		9.51915e-06	0.000512041	0.0810282	0.0567843
						0.32846	0	3.31967	0.301235	0.0735496		0.000162402	0.00045683	0.073778	1.08585		-0.32846	0	3.09047	0.323575	0.0735496		1.951e-05	0.00045683	0.073778	0.130448		-0.028367	0.328516	3.0936	0.323248	0.0812779		2.90954e-05	0.000625725	0.0815908	0.142029		0.155056	0.32846	3.11368	0.321163	0.0812843		9.51944e-06	0.000512056	0.0815403	0.0567844
						0.328004	0	3.31788	0.301397	0.0740064		0.000162402	0.00045683	0.0742348	1.08585		-0.328004	0	3.09028	0.323595	0.0740064		1.951e-05	0.00045683	0.0742348	0.130448		-0.0288238	0.328088	3.09332	0.323278	0.0819036		2.89034e-05	0.000621636	0.0822145	0.142019		0.155287	0.328004	3.11359	0.321172	0.0817963		9.51968e-06	0.000512068	0.0820524	0.0567845
						0.327547	0	3.31609	0.30156	0.0744632		0.000162402	0.00045683	0.0746916	1.08585		-0.327547	0	3.0901	0.323614	0.0744632		1.951e-05	0.00045683	0.0746916	0.130448		-0.0292807	0.327667	3.09304	0.323306	0.0825253		2.87134e-05	0.000617622	0.0828341	0.142003		0.155519	0.327547	3.1135	0.321182	0.0823084		9.51988e-06	0.000512078	0.0825644	0.0567846
						0.32709	0	3.31431	0.301722	0.0749201		0.000162402	0.00045683	0.0751485	1.08585		-0.32709	0	3.08991	0.323634	0.0749201		1.951e-05	0.00045683	0.0751485	0.130448		-0.0297375	0.327251	3.09277	0.323335	0.0831429		2.86374e-05	0.000613684	0.0834497	0.142536		0.15575	0.32709	3.11341	0.321191	0.0828205		9.30227e-06	0.000512085	0.0830765	0.0554858
						0.326633	0	3.31253	0.301884	0.0753769		0.000144413	0.00045683	0.0756053	0.965575		-0.326633	0	3.08972	0.323653	0.0753769		1.69932e-05	0.00045683	0.0756053	0.11362		-0.0301943	0.326841	3.09249	0.323364	0.0837566		2.74951e-05	0.000609829	0.0840615	0.137715		0.155982	0.326633	3.11332	0.321201	0.0833326		7.88469e-06	0.000512062	0.0835886	0.0470324
						0.326176	0	3.31094	0.302029	0.0758337		0.000144413	0.00045683	0.0760621	0.965575		-0.326176	0	3.08956	0.32367	0.0758337		1.69932e-05	0.00045683	0.0760621	0.11362		-0.0306512	0.326437	3.09223	0.323391	0.0843664		2.65691e-05	0.000606292	0.0846696	0.133854		0.156213	0.326176	3.11324	0.321209	0.0838446		8.17027e-06	0.000512058	0.0841006	0.0487363
						0.32572	0	3.30936	0.302173	0.0762905		0.000144413	0.00045683	0.076519	0.965575		-0.32572	0	3.0894	0.323687	0.0762905		1.69932e-05	0.00045683	0.076519	0.11362		-0.031108	0.326039	3.09197	0.323418	0.0849727		2.64292e-05	0.000602986	0.0852742	0.133879		0.156444	0.32572	3.11316	0.321217	0.0843567		8.17016e-06	0.000512051	0.0846127	0.0487364
						0.325263	0	3.30778	0.302318	0.0767474		0.000144413	0.00045683	0.0769758	0.965575		-0.325263	0	3.08924	0.323704	0.0767474		1.69932e-05	0.00045683	0.0769758	0.11362		-0.0315648	0.325645	3.09172	0.323444	0.0855757		2.62904e-05	0.000599734	0.0858756	0.133898		0.156675	0.325263	3.11308	0.321225	0.0848687		8.17002e-06	0.00051204	0.0851247	0.0487365
						0.324806	0	3.3062	0.302462	0.0772042		0.000144413	0.00045683	0.0774326	0.965575		-0.324806	0	3.08908	0.323721	0.0772042		1.69932e-05	0.00045683	0.0774326	0.11362		-0.0320217	0.325257	3.09147	0.323471	0.0861754		2.6153e-05	0.000596535	0.0864737	0.133912		0.156907	0.324806	3.113	0.321233	0.0853808		8.16982e-06	0.000512027	0.0856368	0.0487366
						0.324349	0	3.30462	0.302607	0.077661		0.000144413	0.00045683	0.0778894	0.965575		-0.324349	0	3.08891	0.323738	0.077661		1.69932e-05	0.00045683	0.0778894	0.11362		-0.0324785	0.324873	3.09122	0.323497	0.086772		2.60167e-05	0.000593388	0.0870686	0.133921		0.157138	0.324349	3.11292	0.321241	0.0858928		8.16958e-06	0.00051201	0.0861488	0.0487367
						0.323892	0	3.30304	0.302751	0.0781179		0.000144413	0.00045683	0.0783463	0.965575		-0.323892	0	3.08875	0.323755	0.0781179		1.69932e-05	0.00045683	0.0783463	0.11362		-0.0329353	0.324494	3.09097	0.323523	0.0873653		2.43787e-05	0.000590293	0.0876605	0.126147		0.157369	0.323892	3.11285	0.321249	0.0864048		8.16929e-06	0.00051199	0.0866608	0.0487369
						0.323435	0	3.30147	0.302895	0.0785747		0.000144413	0.00045683	0.0788031	0.965575		-0.323435	0	3.08859	0.323772	0.0785747		1.69932e-05	0.00045683	0.0788031	0.11362		-0.0333921	0.324121	3.09074	0.323547	0.0879556		2.4045e-05	0.00058725	0.0882493	0.125065		0.1576	0.323435	3.11277	0.321258	0.0869168		8.16895e-06	0.000511967	0.0871728	0.0487371
						0.322979	0	3.2999	0.30304	0.0790315		0.000144413	0.00045683	0.0792599	0.965575		-0.322979	0	3.08843	0.323789	0.0790315		1.69932e-05	0.00045683	0.0792599	0.11362		-0.033849	0.323751	3.09051	0.323571	0.0885429		2.39223e-05	0.000584259	0.088835	0.125064		0.157832	0.322979	3.11269	0.321266	0.0874288		8.16855e-06	0.000511939	0.0876847	0.0487373
						0.322522	0	3.29832	0.303184	0.0794884		0.000144413	0.00045683	0.0797168	0.965575		-0.322522	0	3.08827	0.323806	0.0794884		1.69932e-05	0.00045683	0.0797168	0.11362		-0.0343058	0.323387	3.09028	0.323595	0.0891271		2.38007e-05	0.000581318	0.0894178	0.125058		0.158063	0.322522	3.11261	0.321274	0.0879407		8.16809e-06	0.000511908	0.0881966	0.0487376
						0.322065	0	3.29675	0.303329	0.0799452		0.000144413	0.00045683	0.0801736	0.965575		-0.322065	0	3.0881	0.323823	0.0799452		1.69932e-05	0.00045683	0.0801736	0.11362		-0.0347626	0.323028	3.09005	0.323619	0.0897085		2.37701e-05	0.000578427	0.0899977	0.125521		0.158294	0.322065	3.11253	0.321282	0.0884526		8.16757e-06	0.000511872	0.0887085	0.0487379
						0.321608	0	3.29519	0.303473	0.080402		0.000129159	0.00045683	0.0806304	0.863583		-0.321608	0	3.08794	0.32384	0.080402		1.4883e-05	0.00045683	0.0806304	0.099511		-0.0352195	0.322673	3.08983	0.323643	0.0902869		2.45035e-05	0.000575595	0.0905747	0.130031		0.158525	0.321608	3.11245	0.32129	0.0889645		6.84776e-06	0.000511832	0.0892204	0.0408654
						0.321151	0	3.29378	0.303602	0.0808588		0.000129159	0.00045683	0.0810873	0.863583		-0.321151	0	3.0878	0.323855	0.0808588		1.4883e-05	0.00045683	0.0810873	0.099511		-0.0356763	0.322323	3.08959	0.323667	0.0908625		2.31613e-05	0.000572882	0.0911489	0.123491		0.158755	0.321151	3.11238	0.321297	0.0894763		6.84751e-06	0.000511816	0.0897322	0.0408653
						0.320694	0	3.29238	0.303731	0.0813157		0.000129159	0.00045683	0.0815441	0.863583		-0.320694	0	3.08766	0.32387	0.0813157		1.4883e-05	0.00045683	0.0815441	0.099511		-0.0361331	0.321977	3.08937	0.32369	0.0914354		2.26094e-05	0.000570213	0.0917205	0.121112		0.158986	0.320694	3.11232	0.321304	0.0899881		6.84721e-06	0.000511795	0.090244	0.0408651
						0.320238	0	3.29098	0.30386	0.0817725		0.000129159	0.00045683	0.0820009	0.863583		-0.320238	0	3.08752	0.323885	0.0817725		1.4883e-05	0.00045683	0.0820009	0.099511		-0.03659	0.321636	3.08916	0.323713	0.0920056		2.21283e-05	0.000567588	0.0922894	0.119083		0.159217	0.320238	3.11225	0.321311	0.0904999		6.84684e-06	0.000511769	0.0907558	0.040865
						0.319781	0	3.28959	0.30399	0.0822293		0.000129159	0.00045683	0.0824577	0.863583		-0.319781	0	3.08737	0.3239	0.0822293		1.4883e-05	0.00045683	0.0824577	0.099511		-0.0370468	0.321299	3.08895	0.323735	0.0925732		2.20034e-05	0.000565185	0.0928558	0.118914		0.159448	0.319781	3.11218	0.321318	0.0910117		6.84641e-06	0.00051174	0.0912676	0.0408647
						0.319324	0	3.28819	0.304119	0.0826862		0.000129159	0.00045683	0.0829146	0.863583		-0.319324	0	3.08723	0.323915	0.0826862		1.4883e-05	0.00045683	0.0829146	0.099511		-0.0375036	0.320966	3.08874	0.323757	0.0931384		2.19137e-05	0.000562833	0.0934198	0.118924		0.159678	0.319324	3.11212	0.321325	0.0915234		6.8459e-06	0.000511705	0.0917793	0.0408645
						0.318867	0	3.28679	0.304248	0.083143		0.000129159	0.00045683	0.0833714	0.863583		-0.318867	0	3.08709	0.32393	0.083143		1.4883e-05	0.00045683	0.0833714	0.099511		-0.0379604	0.320637	3.08853	0.323779	0.0937012		2.18246e-05	0.000560517	0.0939814	0.11893		0.159909	0.318867	3.11205	0.321331	0.0920351		6.84533e-06	0.000511666	0.092291	0.0408642
						0.31841	0	3.2854	0.304377	0.0835998		0.000129159	0.00045683	0.0838282	0.863583		-0.31841	0	3.08695	0.323945	0.0835998		1.4883e-05	0.00045683	0.0838282	0.099511		-0.0384173	0.320313	3.08832	0.323801	0.0942617		2.12082e-05	0.000558237	0.0945408	0.116043		0.160139	0.31841	3.11199	0.321338	0.0925468		6.84467e-06	0.000511621	0.0928026	0.0408639
						0.317953	0	3.284	0.304506	0.0840566		0.000129159	0.00045683	0.0842851	0.863583		-0.317953	0	3.08681	0.323959	0.0840566		1.4883e-05	0.00045683	0.0842851	0.099511		-0.0388741	0.319992	3.08812	0.323822	0.0948199		2.02361e-05	0.000555992	0.0950979	0.111172		0.16037	0.317953	3.11192	0.321345	0.0930584		6.84394e-06	0.00051157	0.0933142	0.0408635
						0.317497	0	3.28261	0.304635	0.0845135		0.000129159	0.00045683	0.0847419	0.863583		-0.317497	0	3.08666	0.323974	0.0845135		1.4883e-05	0.00045683	0.0847419	0.099511		-0.0393309	0.319675	3.08792	0.323842	0.0953759		2.01561e-05	0.000553781	0.0956528	0.111174		0.1606	0.317497	3.11185	0.321352	0.09357		6.8205e-06	0.000511514	0.0938257	0.0407281
						0.31704	0	3.28122	0.304765	0.0849703		0.000129159	0.00045683	0.0851987	0.863583		-0.31704	0	3.08652	0.323989	0.0849703		1.4883e-05	0.00045683	0.0851987	0.099511		-0.0397878	0.319362	3.08773	0.323862	0.0959297		2.01484e-05	0.000551606	0.0962055	0.11157		0.16083	0.31704	3.11179	0.321359	0.0940815		6.64084e-06	0.000511448	0.0943372	0.0396604
						0.316583	0	3.27983	0.304894	0.0854271		0.000116117	0.00045683	0.0856556	0.776383		-0.316583	0	3.08638	0.324004	0.0854271		1.30952e-05	0.00045683	0.0856556	0.0875575		-0.0402446	0.319053	3.08754	0.323883	0.0964813		2.07496e-05	0.000549471	0.0967561	0.115346		0.16106	0.316583	3.11172	0.321365	0.094593		5.44443e-06	0.000511344	0.0948486	0.0325218
						0.316126	0	3.27858	0.30501	0.085884		0.000116117	0.00045683	0.0861124	0.776383		-0.316126	0	3.08626	0.324017	0.085884		1.30952e-05	0.00045683	0.0861124	0.0875575		-0.0407014	0.318747	3.08734	0.323903	0.0970308		2.0674e-05	0.000547433	0.0973045	0.115353		0.16129	0.316126	3.11167	0.321371	0.0951043		5.69113e-06	0.000511264	0.0953599	0.0340008
						0.315669	0	3.27733	0.305126	0.0863408		0.000116117	0.00045683	0.0865692	0.776383		-0.315669	0	3.08613	0.32403	0.0863408		1.30952e-05	0.00045683	0.0865692	0.0875575		-0.0411582	0.318446	3.08714	0.323924	0.0975782		2.05988e-05	0.000545425	0.0978509	0.115356		0.161519	0.315669	3.11161	0.321377	0.0956156		5.72609e-06	0.000511176	0.0958711	0.0342155
						0.315212	0	3.27609	0.305242	0.0867976		0.000116117	0.00045683	0.087026	0.776383		-0.315212	0	3.08601	0.324043	0.0867976		1.30952e-05	0.00045683	0.087026	0.0875575		-0.0416151	0.318148	3.08695	0.323945	0.0981236		1.94277e-05	0.000543448	0.0983954	0.109194		0.161748	0.315212	3.11156	0.321382	0.0961267		5.72514e-06	0.00051108	0.0963823	0.0342162
						0.314756	0	3.27484	0.305358	0.0872545		0.000116117	0.00045683	0.0874829	0.776383		-0.314756	0	3.08588	0.324056	0.0872545		1.30952e-05	0.00045683	0.0874829	0.0875575		-0.0420719	0.317853	3.08676	0.323964	0.0986671		1.90847e-05	0.0005415	0.0989378	0.107652		0.161978	0.314756	3.1115	0.321388	0.0966378		5.72412e-06	0.000510977	0.0968933	0.034217
						0.314299	0	3.2736	0.305474	0.0877113		0.000116117	0.00045683	0.0879397	0.776383		-0.314299	0	3.08576	0.32407	0.0877113		1.30952e-05	0.00045683	0.0879397	0.0875575		-0.0425287	0.317563	3.08658	0.323983	0.0992086		1.90175e-05	0.000539581	0.0994784	0.107654		0.162207	0.314299	3.11145	0.321394	0.0971488		5.72301e-06	0.000510866	0.0974042	0.0342179
						0.313842	0	3.27235	0.30559	0.0881681		0.000116117	0.00045683	0.0883965	0.776383		-0.313842	0	3.08563	0.324083	0.0881681		1.30952e-05	0.00045683	0.0883965	0.0875575		-0.0429856	0.317276	3.0864	0.324002	0.0997482		1.89508e-05	0.000537693	0.100017	0.107653		0.162435	0.313842	3.11139	0.321399	0.0976597		5.72182e-06	0.000510746	0.097915	0.0342188
						0.313385	0	3.27111	0.305707	0.0886249		0.000116117	0.00045683	0.0888534	0.776383		-0.313385	0	3.08551	0.324096	0.0886249		1.30952e-05	0.00045683	0.0888534	0.0875575		-0.0434424	0.316992	3.08622	0.324021	0.100286		1.88845e-05	0.000535834	0.100554	0.107649		0.162664	0.313385	3.11134	0.321405	0.0981704		5.72053e-06	0.000510616	0.0984257	0.0342198
						0.312928	0	3.26987	0.305823	0.0890818		0.000116117	0.00045683	0.0893102	0.776383		-0.312928	0	3.08538	0.324109	0.0890818		1.30952e-05	0.00045683	0.0893102	0.0875575		-0.0438992	0.316712	3.08604	0.32404	0.100822		1.87043e-05	0.000534004	0.101089	0.106988		0.162892	0.312928	3.11128	0.321411	0.098681		5.71914e-06	0.000510477	0.0989363	0.0342208
						0.312471	0	3.26863	0.305939	0.0895386		0.000116117	0.00045683	0.089767	0.776383		-0.312471	0	3.08526	0.324122	0.0895386		1.30952e-05	0.00045683	0.089767	0.0875575		-0.0443561	0.316435	3.08586	0.324059	0.101356		1.85317e-05	0.000532259	0.101622	0.106348		0.16312	0.312471	3.11123	0.321417	0.0991915		5.71764e-06	0.000510327	0.0994467	0.0342219
						0.312015	0	3.26739	0.306055	0.0899954		0.000116117	0.00045683	0.0902238	0.776383		-0.312015	0	3.08513	0.324135	0.0899954		1.30952e-05	0.00045683	0.0902238	0.0875575		-0.0448129	0.316162	3.08568	0.324077	0.101888		1.73718e-05	0.000530589	0.102153	0.100005		0.163347	0.312015	3.11117	0.321422	0.0997018		5.71604e-06	0.000510166	0.0999569	0.0342231
						0.311558	0	3.26615	0.306171	0.0904523		0.000104884	0.00045683	0.0906807	0.70128		-0.311558	0	3.08501	0.324148	0.0904523		1.15663e-05	0.00045683	0.0906807	0.0773351		-0.0452697	0.315892	3.08552	0.324095	0.102419		1.78556e-05	0.000528948	0.102683	0.103109		0.163574	0.311558	3.11112	0.321428	0.100212		4.59039e-06	0.000509993	0.100467	0.0274929
						0.311101	0	3.26503	0.306276	0.0909091		0.000104884	0.00045683	0.0911375	0.70128		-0.311101	0	3.0849	0.32416	0.0909091		1.15663e-05	0.00045683	0.0911375	0.0773351		-0.0457265	0.315626	3.08535	0.324112	0.102948		1.78048e-05	0.000527387	0.103211	0.10312		0.163801	0.311101	3.11107	0.321433	0.100722		4.58886e-06	0.00050984	0.100977	0.027492
						0.310644	0	3.26391	0.306381	0.0913659		0.000104884	0.00045683	0.0915943	0.70128		-0.310644	0	3.08479	0.324171	0.0913659		1.15663e-05	0.00045683	0.0915943	0.0773351		-0.0461834	0.315362	3.08518	0.32413	0.103475		1.77542e-05	0.000525848	0.103738	0.103128		0.164027	0.310644	3.11103	0.321437	0.101232		4.58721e-06	0.000509676	0.101487	0.027491
						0.310187	0	3.26279	0.306486	0.0918228		0.000104884	0.00045683	0.0920512	0.70128		-0.310187	0	3.08468	0.324183	0.0918228		1.15663e-05	0.00045683	0.0920512	0.0773351		-0.0466402	0.315102	3.08501	0.324148	0.104001		1.77039e-05	0.000524329	0.104263	0.103134		0.164253	0.310187	3.11098	0.321442	0.101741		4.58544e-06	0.000509499	0.101996	0.0274899
						0.30973	0	3.26168	0.306591	0.0922796		0.000104884	0.00045683	0.092508	0.70128		-0.30973	0	3.08457	0.324194	0.0922796		1.15663e-05	0.00045683	0.092508	0.0773351		-0.047097	0.314844	3.08484	0.324166	0.104525		1.76538e-05	0.000522831	0.104786	0.103137		0.164479	0.30973	3.11094	0.321446	0.102251		4.58353e-06	0.000509309	0.102506	0.0274887
						0.309274	0	3.26056	0.306695	0.0927364		0.000104884	0.00045683	0.0929648	0.70128		-0.309274	0	3.08446	0.324206	0.0927364		1.15663e-05	0.00045683	0.0929648	0.0773351		-0.0475539	0.31459	3.08467	0.324183	0.105048		1.75986e-05	0.000521354	0.105309	0.103105		0.164704	0.309274	3.11089	0.321451	0.10276		4.58147e-06	0.000509104	0.103015	0.0274874
						0.308817	0	3.25945	0.3068	0.0931932		0.000104884	0.00045683	0.0934217	0.70128		-0.308817	0	3.08435	0.324218	0.0931932		1.15663e-05	0.00045683	0.0934217	0.0773351		-0.0480107	0.314339	3.08451	0.324201	0.105569		1.64298e-05	0.000519898	0.105829	0.0965273		0.164929	0.308817	3.11085	0.321456	0.103269		4.57925e-06	0.000508885	0.103524	0.0274859
						0.30836	0	3.25833	0.306905	0.0936501		0.000104884	0.00045683	0.0938785	0.70128		-0.30836	0	3.08424	0.324229	0.0936501		1.15663e-05	0.00045683	0.0938785	0.0773351		-0.0484675	0.314091	3.08435	0.324217	0.106089		1.63853e-05	0.000518462	0.106348	0.0965322		0.165153	0.30836	3.11081	0.32146	0.103778		4.57687e-06	0.000508649	0.104033	0.0274844
						0.307903	0	3.25722	0.30701	0.0941069		0.000104884	0.00045683	0.0943353	0.70128		-0.307903	0	3.08413	0.324241	0.0941069		1.15663e-05	0.00045683	0.0943353	0.0773351		-0.0489244	0.313846	3.08419	0.324234	0.106608		1.6341e-05	0.000517047	0.106866	0.0965346		0.165377	0.307903	3.11076	0.321465	0.104287		4.57431e-06	0.000508397	0.104541	0.0274826
						0.307446	0	3.25611	0.307115	0.0945637		0.000104884	0.00045683	0.0947921	0.70128		-0.307446	0	3.08402	0.324252	0.0945637		1.15663e-05	0.00045683	0.0947921	0.0773351		-0.0493812	0.313603	3.08404	0.32425	0.107125		1.62969e-05	0.000515653	0.107382	0.0965344		0.1656	0.307446	3.11072	0.321469	0.104795		4.57156e-06	0.000508126	0.105049	0.0274808
						0.306989	0	3.255	0.30722	0.0950206		0.000104884	0.00045683	0.095249	0.70128		-0.306989	0	3.08391	0.324264	0.0950206		1.15663e-05	0.00045683	0.095249	0.0773351		-0.049838	0.313364	3.08388	0.324266	0.10764		1.63037e-05	0.000514279	0.107897	0.0968327		0.165822	0.306989	3.11067	0.321474	0.105303		4.40674e-06	0.000507835	0.105557	0.0265051
						0.306533	0	3.25389	0.307325	0.0954774		9.51459e-05	0.00045683	0.0957058	0.636167		-0.306533	0	3.0838	0.324275	0.0954774		1.02478e-05	0.00045683	0.0957058	0.0685188		-0.0502948	0.313128	3.08373	0.324283	0.108155		1.67407e-05	0.00051293	0.108411	0.0996899		0.166044	0.306533	3.11063	0.321478	0.105811		3.38602e-06	0.000507488	0.106065	0.0203797
						0.306076	0	3.25288	0.30742	0.0959342		9.51459e-05	0.00045683	0.0961626	0.636167		-0.306076	0	3.0837	0.324286	0.0959342		1.02478e-05	0.00045683	0.0961626	0.0685188		-0.0507517	0.312895	3.08357	0.324299	0.108668		1.66991e-05	0.000511651	0.108923	0.0996904		0.166265	0.306076	3.1106	0.321482	0.106319		3.62792e-06	0.000507153	0.106572	0.0218501
						0.305619	0	3.25187	0.307515	0.096391		9.51459e-05	0.00045683	0.0966195	0.636167		-0.305619	0	3.0836	0.324296	0.096391		1.02478e-05	0.00045683	0.0966195	0.0685188		-0.0512085	0.312664	3.08341	0.324316	0.109179		1.58196e-05	0.00051039	0.109434	0.0946734		0.166485	0.305619	3.11056	0.321485	0.106826		3.62581e-06	0.000506796	0.107079	0.0218528
						0.305162	0	3.25087	0.30761	0.0968479		9.51459e-05	0.00045683	0.0970763	0.636167		-0.305162	0	3.08351	0.324306	0.0968479		1.02478e-05	0.00045683	0.0970763	0.0685188		-0.0516653	0.312437	3.08326	0.324332	0.10969		1.55487e-05	0.000509145	0.109944	0.0932799		0.166705	0.305162	3.11053	0.321489	0.107333		3.62355e-06	0.000506414	0.107586	0.0218557
						0.304705	0	3.24986	0.307705	0.0973047		9.51459e-05	0.00045683	0.0975331	0.636167		-0.304705	0	3.08341	0.324316	0.0973047		1.02478e-05	0.00045683	0.0975331	0.0685188		-0.0521222	0.312212	3.08311	0.324348	0.110199		1.55119e-05	0.000507919	0.110453	0.093284		0.166923	0.304705	3.11049	0.321493	0.107839		3.62113e-06	0.000506006	0.108092	0.0218587
						0.304249	0	3.24886	0.307801	0.0977615		9.51459e-05	0.00045683	0.0979899	0.636167		-0.304249	0	3.08331	0.324327	0.0977615		1.02478e-05	0.00045683	0.0979899	0.0685188		-0.052579	0.31199	3.08297	0.324363	0.110707		1.54753e-05	0.00050671	0.11096	0.0932858		0.167141	0.304249	3.11046	0.321496	0.108345		3.61853e-06	0.000505571	0.108598	0.0218618
						0.303792	0	3.24785	0.307896	0.0982184		9.51459e-05	0.00045683	0.0984468	0.636167		-0.303792	0	3.08321	0.324337	0.0982184		1.02478e-05	0.00045683	0.0984468	0.0685188		-0.0530358	0.311771	3.08282	0.324379	0.111213		1.54377e-05	0.000505518	0.111466	0.0932787		0.167357	0.303792	3.11042	0.3215	0.108851		3.61575e-06	0.000505106	0.109103	0.0218651
						0.303335	0	3.24685	0.307991	0.0986752		9.51459e-05	0.00045683	0.0989036	0.636167		-0.303335	0	3.08312	0.324347	0.0986752		1.02478e-05	0.00045683	0.0989036	0.0685188		-0.0534926	0.311554	3.08267	0.324394	0.111719		1.53359e-05	0.000504345	0.111971	0.0928792		0.167573	0.303335	3.11039	0.321503	0.109356		3.61276e-06	0.000504609	0.109608	0.0218685
						0.302878	0	3.24585	0.308086	0.099132		9.51459e-05	0.00045683	0.0993604	0.636167		-0.302878	0	3.08302	0.324357	0.099132		1.02478e-05	0.00045683	0.0993604	0.0685188		-0.0539495	0.311341	3.08253	0.324409	0.112223		1.53022e-05	0.000503237	0.112475	0.0928785		0.167787	0.302878	3.11035	0.321507	0.10986		3.60956e-06	0.000504079	0.110112	0.0218721
						0.302421	0	3.24485	0.308181	0.0995889		9.51459e-05	0.00045683	0.0998173	0.636167		-0.302421	0	3.08292	0.324368	0.0995889		1.02478e-05	0.00045683	0.0998173	0.0685188		-0.0544063	0.311129	3.08238	0.324425	0.112726		1.49574e-05	0.000502145	0.112978	0.0909838		0.168	0.302421	3.11032	0.321511	0.110365		3.60612e-06	0.000503512	0.110616	0.0218759
						0.301964	0	3.24384	0.308276	0.100046		9.51459e-05	0.00045683	0.100274	0.636167		-0.301964	0	3.08282	0.324378	0.100046		1.02478e-05	0.00045683	0.100274	0.0685188		-0.0548631	0.310921	3.08224	0.32444	0.113229		1.43515e-05	0.000501067	0.113479	0.0874858		0.168212	0.301964	3.11028	0.321514	0.110868		3.60242e-06	0.000502906	0.111119	0.0218798
						0.301508	0	3.24284	0.308371	0.100503		8.66523e-05	0.00045683	0.100731	0.579377		-0.301508	0	3.08273	0.324388	0.100503		9.10167e-06	0.00045683	0.100731	0.0608559		-0.05532	0.310715	3.0821	0.324454	0.11373		1.46896e-05	0.000500009	0.11398	0.089736		0.168422	0.301508	3.11025	0.321518	0.111371		2.6143e-06	0.000502257	0.111622	0.0158988
						0.301051	0	3.24193	0.308458	0.100959		8.66523e-05	0.00045683	0.101188	0.579377		-0.301051	0	3.08264	0.324397	0.100959		9.10167e-06	0.00045683	0.101188	0.0608559		-0.0557768	0.310512	3.08196	0.324469	0.11423		1.46612e-05	0.000499008	0.114479	0.0897422		0.168631	0.301051	3.11022	0.32152	0.111873		2.61028e-06	0.000501607	0.112124	0.015895
						0.300594	0	3.24102	0.308545	0.101416		8.66523e-05	0.00045683	0.101645	0.579377		-0.300594	0	3.08255	0.324406	0.101416		9.10167e-06	0.00045683	0.101645	0.0608559		-0.0562336	0.310311	3.08182	0.324483	0.114729		1.46329e-05	0.000498021	0.114978	0.0897466		0.168838	0.300594	3.1102	0.321523	0.112375		2.60596e-06	0.000500912	0.112625	0.0158907
						0.300137	0	3.24011	0.308631	0.101873		8.66523e-05	0.00045683	0.102101	0.579377		-0.300137	0	3.08247	0.324415	0.101873		9.10167e-06	0.00045683	0.102101	0.0608559		-0.0566905	0.310113	3.08168	0.324498	0.115227		1.46047e-05	0.000497046	0.115475	0.0897491		0.169044	0.300137	3.11017	0.321526	0.112876		2.6013e-06	0.000500168	0.113126	0.0158858
						0.29968	0	3.2392	0.308718	0.10233		8.66523e-05	0.00045683	0.102558	0.579377		-0.29968	0	3.08238	0.324424	0.10233		9.10167e-06	0.00045683	0.102558	0.0608559		-0.0571473	0.309917	3.08155	0.324512	0.115724		1.45765e-05	0.000496084	0.115972	0.0897498		0.169247	0.29968	3.11015	0.321528	0.113376		2.59628e-06	0.000499372	0.113626	0.0158804
						0.299223	0	3.23829	0.308805	0.102787		8.66523e-05	0.00045683	0.103015	0.579377		-0.299223	0	3.08229	0.324434	0.102787		9.10167e-06	0.00045683	0.103015	0.0608559		-0.0576041	0.309724	3.08141	0.324527	0.11622		1.45484e-05	0.000495134	0.116467	0.0897486		0.169449	0.299223	3.11012	0.321531	0.113875		2.59086e-06	0.000498521	0.114125	0.0158743
						0.298767	0	3.23738	0.308891	0.103243		8.66523e-05	0.00045683	0.103472	0.579377		-0.298767	0	3.08221	0.324443	0.103243		9.10167e-06	0.00045683	0.103472	0.0608559		-0.0580609	0.309533	3.08127	0.324542	0.116715		1.39372e-05	0.000494197	0.116962	0.0861409		0.169649	0.298767	3.1101	0.321533	0.114374		2.585e-06	0.000497609	0.114623	0.0158675
						0.29831	0	3.23648	0.308978	0.1037		8.66523e-05	0.00045683	0.103929	0.579377		-0.29831	0	3.08212	0.324452	0.1037		9.10167e-06	0.00045683	0.103929	0.0608559		-0.0585178	0.309344	3.08114	0.324556	0.117209		1.36204e-05	0.000493273	0.117456	0.0843408		0.169846	0.29831	3.11007	0.321536	0.114871		2.57867e-06	0.000496634	0.11512	0.0158597
						0.297853	0	3.23557	0.309065	0.104157		8.66523e-05	0.00045683	0.104386	0.579377		-0.297853	0	3.08204	0.324461	0.104157		9.10167e-06	0.00045683	0.104386	0.0608559		-0.0589746	0.309158	3.08101	0.324569	0.117702		1.35958e-05	0.000492362	0.117949	0.0843445		0.170041	0.297853	3.11005	0.321539	0.115368		2.57182e-06	0.000495589	0.115616	0.0158509
						0.297396	0	3.23466	0.309151	0.104614		8.66523e-05	0.00045683	0.104842	0.579377		-0.297396	0	3.08195	0.32447	0.104614		9.10167e-06	0.00045683	0.104842	0.0608559		-0.0594314	0.308974	3.08088	0.324583	0.118195		1.35713e-05	0.000491463	0.118441	0.0843464		0.170233	0.297396	3.11002	0.321541	0.115864		2.56438e-06	0.000494471	0.116111	0.0158408
						0.296939	0	3.23376	0.309238	0.105071		8.66523e-05	0.00045683	0.105299	0.579377		-0.296939	0	3.08186	0.324479	0.105071		9.10167e-06	0.00045683	0.105299	0.0608559		-0.0598883	0.308793	3.08075	0.324596	0.118686		1.35802e-05	0.000490576	0.118932	0.0845543		0.170422	0.296939	3.11	0.321544	0.116358		2.82509e-06	0.000493273	0.116605	0.0174936
						0.296482	0	3.23285	0.309325	0.105528		7.92042e-05	0.00045683	0.105756	0.529577		-0.296482	0	3.08178	0.324488	0.105528		8.09839e-06	0.00045683	0.105756	0.0541476		-0.0603451	0.308614	3.08062	0.32461	0.119177		1.38724e-05	0.000489707	0.119422	0.0865266		0.170608	0.296482	3.10997	0.321547	0.116851		1.9097e-06	0.000491992	0.117097	0.0118561
						0.296026	0	3.23202	0.309404	0.105984		7.92042e-05	0.00045683	0.106213	0.529577		-0.296026	0	3.0817	0.324496	0.105984		8.09839e-06	0.00045683	0.106213	0.0541476		-0.0608019	0.308438	3.08049	0.324624	0.119667		1.38492e-05	0.000488888	0.119911	0.086527		0.170791	0.296026	3.10995	0.321548	0.117343		1.82881e-06	0.000490675	0.117589	0.0113844
						0.295569	0	3.2312	0.309483	0.106441		7.92042e-05	0.00045683	0.10667	0.529577		-0.295569	0	3.08162	0.324504	0.106441		8.09839e-06	0.00045683	0.10667	0.0541476		-0.0612587	0.308264	3.08036	0.324638	0.120155		1.38261e-05	0.000488079	0.120399	0.0865258		0.17097	0.295569	3.10993	0.32155	0.117834		1.78407e-06	0.000489247	0.118079	0.0111383
						0.295112	0	3.23037	0.309562	0.106898		7.92042e-05	0.00045683	0.107127	0.529577		-0.295112	0	3.08155	0.324512	0.106898		8.09839e-06	0.00045683	0.107127	0.0541476		-0.0617156	0.308092	3.08023	0.324651	0.120643		1.3172e-05	0.000487282	0.120887	0.0825669		0.171145	0.295112	3.10992	0.321552	0.118323		1.78055e-06	0.000487711	0.118567	0.0111513
						0.294655	0	3.22954	0.309641	0.107355		7.92042e-05	0.00045683	0.107583	0.529577		-0.294655	0	3.08147	0.324521	0.107355		8.09839e-06	0.00045683	0.107583	0.0541476		-0.0621724	0.307922	3.0801	0.324665	0.121131		1.29615e-05	0.000486495	0.121374	0.0813788		0.171316	0.294655	3.1099	0.321554	0.118811		1.7767e-06	0.000486076	0.119054	0.0111647
						0.294198	0	3.22872	0.309721	0.107812		7.92042e-05	0.00045683	0.10804	0.529577		-0.294198	0	3.08139	0.324529	0.107812		8.09839e-06	0.00045683	0.10804	0.0541476		-0.0626292	0.307755	3.07998	0.324678	0.121617		1.29415e-05	0.000485719	0.12186	0.0813831		0.171482	0.294198	3.10988	0.321556	0.119297		1.77251e-06	0.000484338	0.119539	0.0111783
						0.293741	0	3.22789	0.3098	0.108269		7.92042e-05	0.00045683	0.108497	0.529577		-0.293741	0	3.08131	0.324537	0.108269		8.09839e-06	0.00045683	0.108497	0.0541476		-0.0630861	0.30759	3.07986	0.324691	0.122103		1.29215e-05	0.000484953	0.122345	0.0813859		0.171643	0.293741	3.10986	0.321557	0.119781		1.76792e-06	0.000482494	0.120023	0.011192
						0.293285	0	3.22707	0.309879	0.108725		7.92042e-05	0.00045683	0.108954	0.529577		-0.293285	0	3.08124	0.324545	0.108725		8.09839e-06	0.00045683	0.108954	0.0541476		-0.0635429	0.307427	3.07973	0.324703	0.122588		1.29016e-05	0.000484199	0.12283	0.0813871		0.171798	0.293285	3.10985	0.321559	0.120264		1.7629e-06	0.000480543	0.120504	0.0112055
						0.292828	0	3.22624	0.309958	0.109182		7.92042e-05	0.00045683	0.109411	0.529577		-0.292828	0	3.08116	0.324553	0.109182		8.09839e-06	0.00045683	0.109411	0.0541476		-0.0639997	0.307267	3.07961	0.324716	0.123072		1.28817e-05	0.000483455	0.123314	0.0813867		0.171947	0.292828	3.10983	0.321561	0.120744		1.75739e-06	0.000478486	0.120984	0.0112185
						0.292371	0	3.22542	0.310037	0.109639		7.92042e-05	0.00045683	0.109868	0.529577		-0.292371	0	3.08108	0.324561	0.109639		8.09839e-06	0.00045683	0.109868	0.0541476		-0.0644566	0.307109	3.07949	0.324729	0.123556		1.28619e-05	0.000482722	0.123797	0.0813847		0.172089	0.292371	3.10981	0.321563	0.121223		1.75135e-06	0.000476327	0.121461	0.0112306
						0.291914	0	3.22459	0.310117	0.110096		7.92042e-05	0.00045683	0.110324	0.529577		-0.291914	0	3.08101	0.324569	0.110096		8.09839e-06	0.00045683	0.110324	0.0541476		-0.0649134	0.306953	3.07937	0.324742	0.124038		1.287e-05	0.000481999	0.124279	0.0815584		0.172224	0.291914	3.1098	0.321564	0.121699		1.74469e-06	0.000474076	0.121936	0.011241
						0.291457	0	3.22377	0.310196	0.110553		7.26403e-05	0.00045683	0.110781	0.485689		-0.291457	0	3.08093	0.324577	0.110553		7.21424e-06	0.00045683	0.110781	0.0482361		-0.0653702	0.306799	3.07924	0.324755	0.12452		1.26302e-05	0.000481291	0.124761	0.0801566		0.172351	0.291457	3.10978	0.321566	0.122173		8.53858e-07	0.000471747	0.122409	0.00552856
						0.291	0	3.22302	0.310268	0.11101		7.26403e-05	0.00045683	0.111238	0.485689		-0.291	0	3.08086	0.324584	0.11101		7.21424e-06	0.00045683	0.111238	0.0482361		-0.065827	0.306647	3.07912	0.324768	0.125002		1.23357e-05	0.000480627	0.125242	0.0783954		0.172469	0.291	3.10977	0.321567	0.122645		8.46017e-07	0.000469434	0.12288	0.00550477
						0.290544	0	3.22226	0.310341	0.111466		7.26403e-05	0.00045683	0.111695	0.485689		-0.290544	0	3.08079	0.324592	0.111466		7.21424e-06	0.00045683	0.111695	0.0482361		-0.0662839	0.306498	3.07901	0.32478	0.125482		1.23256e-05	0.000479976	0.125722	0.0784378		0.172577	0.290544	3.10976	0.321568	0.123115		8.37383e-07	0.000467105	0.123348	0.00547576
						0.290087	0	3.22151	0.310414	0.111923		7.26403e-05	0.00045683	0.112152	0.485689		-0.290087	0	3.08073	0.324599	0.111923		7.21424e-06	0.00045683	0.112152	0.0482361		-0.0667407	0.306351	3.07889	0.324792	0.125962		1.231e-05	0.000479348	0.126202	0.0784409		0.172674	0.290087	3.10976	0.321569	0.123582		8.27864e-07	0.000464805	0.123814	0.00544031
						0.28963	0	3.22075	0.310486	0.11238		7.26403e-05	0.00045683	0.112608	0.485689		-0.28963	0	3.08066	0.324606	0.11238		7.21424e-06	0.00045683	0.112608	0.0482361		-0.0671975	0.306206	3.07877	0.324805	0.126442		1.22943e-05	0.000478727	0.126681	0.0784426		0.17276	0.28963	3.10975	0.32157	0.124046		1.13165e-06	0.000462597	0.124278	0.00747214
						0.289173	0	3.22	0.310559	0.112837		7.26403e-05	0.00045683	0.113065	0.485689		-0.289173	0	3.08059	0.324613	0.112837		7.21424e-06	0.00045683	0.113065	0.0482361		-0.0676544	0.306063	3.07866	0.324817	0.12692		1.22787e-05	0.000478116	0.127159	0.078443		0.172833	0.289173	3.10974	0.321571	0.124509		1.21528e-06	0.000460569	0.124739	0.00805966
						0.288716	0	3.21925	0.310632	0.113294		7.26403e-05	0.00045683	0.113522	0.485689		-0.288716	0	3.08052	0.324621	0.113294		7.21424e-06	0.00045683	0.113522	0.0482361		-0.0681112	0.305921	3.07854	0.324829	0.127398		1.2263e-05	0.000477512	0.127637	0.0784421		0.172891	0.288716	3.10972	0.321572	0.12497		1.21866e-06	0.000458834	0.125199	0.00811264
						0.288259	0	3.21849	0.310704	0.113751		7.26403e-05	0.00045683	0.113979	0.485689		-0.288259	0	3.08045	0.324628	0.113751		7.21424e-06	0.00045683	0.113979	0.0482361		-0.068568	0.305782	3.07843	0.324841	0.127876		1.22474e-05	0.000476917	0.128114	0.0784398		0.172934	0.288259	3.10971	0.321573	0.125428		1.22239e-06	0.00045754	0.125657	0.00816049
						0.287803	0	3.21774	0.310777	0.114207		7.26403e-05	0.00045683	0.114436	0.485689		-0.287803	0	3.08038	0.324635	0.114207		7.21424e-06	0.00045683	0.114436	0.0482361		-0.0690249	0.305645	3.07831	0.324854	0.128353		1.206e-05	0.00047633	0.128591	0.077335		0.17296	0.287803	3.1097	0.321574	0.125886		1.2265e-06	0.000456874	0.126114	0.00819989
						0.287346	0	3.21699	0.31085	0.114664		7.26403e-05	0.00045683	0.114893	0.485689		-0.287346	0	3.08031	0.324642	0.114664		7.21424e-06	0.00045683	0.114893	0.0482361		-0.0694817	0.305511	3.07819	0.324866	0.128829		1.15499e-05	0.000475751	0.129067	0.074154		0.172966	0.287346	3.10969	0.321576	0.126343		1.23103e-06	0.000457066	0.126571	0.00822669
						0.286889	0	3.21624	0.310922	0.115121		7.26403e-05	0.00045683	0.115349	0.485689		-0.286889	0	3.08025	0.324649	0.115121		7.21424e-06	0.00045683	0.115349	0.0482361		-0.0699385	0.305378	3.07809	0.324877	0.129305		1.15563e-05	0.00047518	0.129543	0.0742838		0.172951	0.286889	3.10968	0.321577	0.1268		1.236e-06	0.000458393	0.127029	0.00823601
						0.286432	0	3.21549	0.310995	0.115578		6.68294e-05	0.00045683	0.115806	0.446836		-0.286432	0	3.08018	0.324657	0.115578		6.43025e-06	0.00045683	0.115806	0.0429941		-0.0703953	0.305247	3.07798	0.324889	0.12978		1.17295e-05	0.000474621	0.130017	0.075486		0.172914	0.286432	3.10967	0.321578	0.127258		3.93115e-07	0.000461171	0.127489	0.00260371
						0.285975	0	3.2148	0.311062	0.116035		6.68294e-05	0.00045683	0.116263	0.446836		-0.285975	0	3.08012	0.324663	0.116035		6.43025e-06	0.00045683	0.116263	0.0429941		-0.0708522	0.305118	3.07786	0.324901	0.130255		1.17169e-05	0.000474099	0.130492	0.0754884		0.17285	0.285975	3.10966	0.321578	0.127719		3.98855e-07	0.000465579	0.127952	0.00261672
						0.285519	0	3.21411	0.311129	0.116492		6.68294e-05	0.00045683	0.11672	0.446836		-0.285519	0	3.08006	0.324669	0.116492		6.43025e-06	0.00045683	0.11672	0.0429941		-0.071309	0.304991	3.07775	0.324912	0.130729		1.17044e-05	0.000473584	0.130966	0.0754896		0.172761	0.285519	3.10966	0.321579	0.128185		4.05045e-07	0.00047198	0.128421	0.00262128
						0.285062	0	3.21342	0.311195	0.116948		6.68294e-05	0.00045683	0.117177	0.446836		-0.285062	0	3.07999	0.324676	0.116948		6.43025e-06	0.00045683	0.117177	0.0429941		-0.0717658	0.304867	3.07764	0.324924	0.131202		1.16919e-05	0.000473077	0.131439	0.0754896		0.172642	0.285062	3.10965	0.321579	0.128657		6.00889e-07	0.000480654	0.128897	0.00381854
						0.284605	0	3.21273	0.311262	0.117405		6.68294e-05	0.00045683	0.117634	0.446836		-0.284605	0	3.07993	0.324682	0.117405		6.43025e-06	0.00045683	0.117634	0.0429941		-0.0722227	0.304744	3.07753	0.324936	0.131675		1.16793e-05	0.000472576	0.131912	0.0754885		0.172492	0.284605	3.10965	0.32158	0.129138		1.05803e-06	0.00049181	0.129384	0.00657104
						0.284148	0	3.21204	0.311329	0.117862		6.68294e-05	0.00045683	0.11809	0.446836		-0.284148	0	3.07987	0.324689	0.117862		6.43025e-06	0.00045683	0.11809	0.0429941		-0.0726795	0.304623	3.07742	0.324947	0.132148		1.16667e-05	0.000472083	0.132384	0.0754861		0.17231	0.284148	3.10964	0.321581	0.129629		1.09982e-06	0.000505557	0.129882	0.00664489
						0.283691	0	3.21135	0.311396	0.118319		6.68294e-05	0.00045683	0.118547	0.446836		-0.283691	0	3.07981	0.324695	0.118319		6.43025e-06	0.00045683	0.118547	0.0429941		-0.0731363	0.304504	3.07731	0.324959	0.13262		1.12634e-05	0.000471596	0.132856	0.0729512		0.172094	0.283691	3.10963	0.321582	0.130135		1.14327e-06	0.000521869	0.130396	0.00669149
						0.283234	0	3.21066	0.311463	0.118776		6.68294e-05	0.00045683	0.119004	0.446836		-0.283234	0	3.07975	0.324702	0.118776		6.43025e-06	0.00045683	0.119004	0.0429941		-0.0735931	0.304387	3.0772	0.32497	0.133092		1.10247e-05	0.000471118	0.133327	0.0714779		0.171841	0.283234	3.10962	0.321583	0.130657		1.18788e-06	0.000540567	0.130927	0.00671209
						0.282778	0	3.20997	0.311529	0.119233		6.68294e-05	0.00045683	0.119461	0.446836		-0.282778	0	3.07969	0.324708	0.119233		6.43025e-06	0.00045683	0.119461	0.0429941		-0.07405	0.304271	3.0771	0.324981	0.133563		1.10142e-05	0.000470646	0.133798	0.0714815		0.171552	0.282778	3.1096	0.321584	0.131197		1.23308e-06	0.00056133	0.131478	0.00670979
						0.282321	0	3.20928	0.311596	0.119689		6.68294e-05	0.00045683	0.119918	0.446836		-0.282321	0	3.07963	0.324715	0.119689		6.43025e-06	0.00045683	0.119918	0.0429941		-0.0745068	0.304158	3.077	0.324992	0.134033		1.10037e-05	0.000470181	0.134269	0.071484		0.171226	0.282321	3.10959	0.321586	0.131759		1.27825e-06	0.000583711	0.132051	0.0066889
						0.281864	0	3.20859	0.311663	0.120146		6.68294e-05	0.00045683	0.120375	0.446836		-0.281864	0	3.07957	0.324721	0.120146		6.43025e-06	0.00045683	0.120375	0.0429941		-0.0749636	0.304047	3.07689	0.325003	0.134504		1.10083e-05	0.000469724	0.134739	0.0715837		0.170863	0.281864	3.10958	0.321587	0.132343		1.47051e-06	0.000607186	0.132646	0.00739745
						0.281407	0	3.2079	0.31173	0.120603		6.16635e-05	0.00045683	0.120831	0.412296		-0.281407	0	3.07951	0.324727	0.120603		5.731e-06	0.00045683	0.120831	0.0383187		-0.0754205	0.303938	3.07679	0.325014	0.134973		1.11414e-05	0.000469277	0.135208	0.072518		0.170463	0.281407	3.10957	0.321588	0.13295		1.16124e-06	0.00063177	0.133266	0.00561435
						0.28095	0	3.20727	0.311792	0.12106		6.16635e-05	0.00045683	0.121288	0.412296		-0.28095	0	3.07945	0.324733	0.12106		5.731e-06	0.00045683	0.121288	0.0383187		-0.0758773	0.30383	3.07668	0.325025	0.135443		1.11316e-05	0.000468862	0.135677	0.072518		0.170027	0.28095	3.10955	0.321589	0.133581		1.18123e-06	0.000637405	0.1339	0.0056605
						0.280493	0	3.20664	0.311853	0.121517		6.16635e-05	0.00045683	0.121745	0.412296		-0.280493	0	3.0794	0.324739	0.121517		5.731e-06	0.00045683	0.121745	0.0383187		-0.0763341	0.303725	3.07658	0.325037	0.135912		1.11217e-05	0.000468453	0.136146	0.072517		0.16957	0.280506	3.10954	0.321591	0.134219		1.15361e-06	0.000618831	0.134528	0.00569408
						0.280037	0	3.206	0.311915	0.121974		6.16635e-05	0.00045683	0.122202	0.412296		-0.280037	0	3.07934	0.324745	0.121974		5.731e-06	0.00045683	0.122202	0.0383187		-0.076791	0.303621	3.07647	0.325048	0.13638		1.11118e-05	0.00046805	0.136614	0.0725149		0.169113	0.280088	3.10953	0.321592	0.134838		1.13193e-06	0.000604699	0.13514	0.00571764
						0.27958	0	3.20537	0.311977	0.12243		6.16635e-05	0.00045683	0.122659	0.412296		-0.27958	0	3.07929	0.32475	0.12243		5.731e-06	0.00045683	0.122659	0.0383187		-0.0772478	0.303519	3.07637	0.325059	0.136848		1.06763e-05	0.000467654	0.137082	0.0697322		0.168656	0.279692	3.10952	0.321593	0.135442		1.11447e-06	0.000593628	0.135739	0.00573444
						0.279123	0	3.20473	0.312038	0.122887		6.16635e-05	0.00045683	0.123116	0.412296		-0.279123	0	3.07923	0.324756	0.122887		5.731e-06	0.00045683	0.123116	0.0383187		-0.0777046	0.303419	3.07627	0.32507	0.137316		1.05243e-05	0.000467264	0.137549	0.0687968		0.168199	0.279313	3.10951	0.321594	0.136036		1.62471e-06	0.000584751	0.136328	0.00848671
						0.278666	0	3.2041	0.3121	0.123344		6.16635e-05	0.00045683	0.123572	0.412296		-0.278666	0	3.07918	0.324762	0.123344		5.731e-06	0.00045683	0.123572	0.0383187		-0.0781614	0.303321	3.07617	0.32508	0.137783		1.05163e-05	0.00046688	0.138016	0.0688008		0.167742	0.278948	3.10949	0.321596	0.136621		1.86673e-06	0.000577496	0.13691	0.00987345
						0.278209	0	3.20347	0.312162	0.123801		6.16635e-05	0.00045683	0.124029	0.412296		-0.278209	0	3.07913	0.324767	0.123801		5.731e-06	0.00045683	0.124029	0.0383187		-0.0786183	0.303225	3.07607	0.325091	0.13825		1.05083e-05	0.000466503	0.138483	0.0688037		0.167286	0.278595	3.10948	0.321598	0.137198		1.84704e-06	0.00057147	0.137484	0.00987231
						0.277752	0	3.20284	0.312223	0.124258		6.16635e-05	0.00045683	0.124486	0.412296		-0.277752	0	3.07907	0.324773	0.124258		5.731e-06	0.00045683	0.124486	0.0383187		-0.0790751	0.30313	3.07597	0.325101	0.138716		1.05002e-05	0.000466132	0.138949	0.0688055		0.166829	0.278251	3.10946	0.321599	0.13777		1.83018e-06	0.000566398	0.138053	0.00986979
						0.277296	0	3.2022	0.312285	0.124714		6.16635e-05	0.00045683	0.124943	0.412296		-0.277296	0	3.07902	0.324779	0.124714		5.731e-06	0.00045683	0.124943	0.0383187		-0.0795319	0.303037	3.07587	0.325112	0.139182		1.04921e-05	0.000465768	0.139415	0.0688064		0.166372	0.277917	3.10944	0.321601	0.138336		1.8156e-06	0.000562078	0.138617	0.00986639
						0.276839	0	3.20157	0.312347	0.125171		6.16635e-05	0.00045683	0.1254	0.412296		-0.276839	0	3.07896	0.324785	0.125171		5.731e-06	0.00045683	0.1254	0.0383187		-0.0799888	0.302947	3.07577	0.325122	0.139648		1.04948e-05	0.00046541	0.139881	0.0688771		0.165915	0.277589	3.10942	0.321603	0.138898		1.59462e-06	0.00055836	0.139177	0.00872327
						0.276382	0	3.20094	0.312408	0.125628		5.70533e-05	0.00045683	0.125857	0.381471		-0.276382	0	3.07891	0.32479	0.125628		5.10386e-06	0.00045683	0.125857	0.0341256		-0.0804456	0.302858	3.07567	0.325133	0.140114		1.05892e-05	0.000465061	0.140346	0.0695486		0.165458	0.277268	3.10941	0.321605	0.139457		1.77691e-06	0.0005549	0.139734	0.00978107
						0.275925	0	3.20036	0.312465	0.126085		5.70533e-05	0.00045683	0.126313	0.381471		-0.275925	0	3.07886	0.324796	0.126085		5.10386e-06	0.00045683	0.126313	0.0341256		-0.0809024	0.302771	3.07557	0.325143	0.140579		1.05816e-05	0.000464739	0.140811	0.069547		0.165001	0.276953	3.10939	0.321606	0.140011		2.24782e-06	0.000551827	0.140287	0.0124421
						0.275468	0	3.19977	0.312522	0.126542		5.70533e-05	0.00045683	0.12677	0.381471		-0.275468	0	3.07881	0.324801	0.126542		5.10386e-06	0.00045683	0.12677	0.0341256		-0.0813593	0.302685	3.07547	0.325154	0.141043		1.02657e-05	0.000464422	0.141276	0.0675167		0.164545	0.276643	3.10937	0.321609	0.140563		2.15859e-06	0.000549122	0.140838	0.0120071
						0.275011	0	3.19919	0.312579	0.126999		5.70533e-05	0.00045683	0.127227	0.381471		-0.275011	0	3.07876	0.324806	0.126999		5.10386e-06	0.00045683	0.127227	0.0341256		-0.0818161	0.302602	3.07537	0.325164	0.141508		1.00474e-05	0.000464111	0.14174	0.0661254		0.164088	0.276339	3.10935	0.321611	0.141112		1.69894e-06	0.000546771	0.141386	0.00949089
						0.274555	0	3.1986	0.312636	0.127455		5.70533e-05	0.00045683	0.127684	0.381471		-0.274555	0	3.07872	0.324811	0.127455		5.10386e-06	0.00045683	0.127684	0.0341256		-0.0822729	0.30252	3.07528	0.325174	0.141972		1.00415e-05	0.000463806	0.142204	0.0661297		0.163631	0.276038	3.10933	0.321612	0.141659		1.69496e-06	0.000544939	0.141932	0.0095005
						0.274098	0	3.19802	0.312694	0.127912		5.70533e-05	0.00045683	0.128141	0.381471		-0.274098	0	3.07867	0.324816	0.127912		5.10386e-06	0.00045683	0.128141	0.0341256		-0.0827297	0.30244	3.07518	0.325184	0.142436		1.00355e-05	0.000463507	0.142668	0.0661332		0.163174	0.275741	3.10932	0.321614	0.142204		1.69136e-06	0.000543292	0.142476	0.00950905
						0.273641	0	3.19744	0.312751	0.128369		5.70533e-05	0.00045683	0.128598	0.381471		-0.273641	0	3.07862	0.324821	0.128369		5.10386e-06	0.00045683	0.128598	0.0341256		-0.0831866	0.302361	3.07509	0.325194	0.142899		1.00296e-05	0.000463213	0.143131	0.0661357		0.162717	0.275447	3.1093	0.321616	0.142747		1.68808e-06	0.000541803	0.143018	0.0095167
						0.273184	0	3.19685	0.312808	0.128826		5.70533e-05	0.00045683	0.129054	0.381471		-0.273184	0	3.07857	0.324826	0.128826		5.10386e-06	0.00045683	0.129054	0.0341256		-0.0836434	0.302285	3.07499	0.325204	0.143363		1.00236e-05	0.000462925	0.143594	0.0661374		0.16226	0.275156	3.10928	0.321618	0.143289		2.15839e-06	0.00054045	0.143559	0.0121986
						0.272727	0	3.19627	0.312865	0.129283		5.70533e-05	0.00045683	0.129511	0.381471		-0.272727	0	3.07852	0.324831	0.129283		5.10386e-06	0.00045683	0.129511	0.0341256		-0.0841002	0.30221	3.0749	0.325214	0.143825		1.00176e-05	0.000462643	0.144057	0.066138		0.161804	0.274867	3.10926	0.32162	0.14383		2.36511e-06	0.000539218	0.144099	0.0133975
						0.27227	0	3.19569	0.312922	0.12974		5.70533e-05	0.00045683	0.129968	0.381471		-0.27227	0	3.07847	0.324836	0.12974		5.10386e-06	0.00045683	0.129968	0.0341256		-0.0845571	0.302137	3.0748	0.325224	0.144288		1.00116e-05	0.000462367	0.144519	0.0661378		0.161347	0.274581	3.10924	0.321622	0.144369		2.36062e-06	0.000538089	0.144638	0.0134001
						0.271814	0	3.1951	0.312979	0.130196		5.70533e-05	0.00045683	0.130425	0.381471		-0.271814	0	3.07842	0.324841	0.130196		5.10386e-06	0.00045683	0.130425	0.0341256		-0.0850139	0.302065	3.07471	0.325234	0.14475		1.00122e-05	0.000462097	0.144981	0.0661809		0.16089	0.274296	3.10922	0.321624	0.144907		2.16583e-06	0.000537053	0.145176	0.012318
						0.271357	0	3.19452	0.313036	0.130653		5.29242e-05	0.00045683	0.130882	0.353863		-0.271357	0	3.07838	0.324847	0.130653		4.53845e-06	0.00045683	0.130882	0.0303451		-0.0854707	0.301996	3.07461	0.325244	0.145213		9.99754e-06	0.000461835	0.145443	0.0661214		0.160433	0.274014	3.1092	0.321627	0.145444		2.11718e-06	0.00053594	0.145712	0.0120664
						0.2709	0	3.19398	0.313089	0.13111		5.29242e-05	0.00045683	0.131339	0.353863		-0.2709	0	3.07833	0.324851	0.13111		4.53845e-06	0.00045683	0.131339	0.0303451		-0.0859275	0.301928	3.07452	0.325254	0.145674		9.59267e-06	0.000461594	0.145905	0.0634767		0.159976	0.273734	3.10917	0.321629	0.14598		2.11289e-06	0.000534878	0.146247	0.0120658
						0.270443	0	3.19344	0.313142	0.131567		5.29242e-05	0.00045683	0.131795	0.353863		-0.270443	0	3.07829	0.324856	0.131567		4.53845e-06	0.00045683	0.131795	0.0303451		-0.0863844	0.301862	3.07443	0.325264	0.146136		9.58851e-06	0.000461359	0.146367	0.0634815		0.159519	0.273455	3.10915	0.321631	0.146515		2.1089e-06	0.000533895	0.146782	0.0120652
						0.269986	0	3.1929	0.313195	0.132024		5.29242e-05	0.00045683	0.132252	0.353863		-0.269986	0	3.07825	0.32486	0.132024		4.53845e-06	0.00045683	0.132252	0.0303451		-0.0868412	0.301797	3.07434	0.325273	0.146597		9.58435e-06	0.000461129	0.146828	0.0634856		0.159063	0.273179	3.10913	0.321633	0.147049		2.6899e-06	0.000532983	0.147315	0.0154155
						0.269529	0	3.19236	0.313248	0.132481		5.29242e-05	0.00045683	0.132709	0.353863		-0.269529	0	3.0782	0.324865	0.132481		4.53845e-06	0.00045683	0.132709	0.0303451		-0.087298	0.301734	3.07425	0.325283	0.147058		9.58017e-06	0.000460904	0.147289	0.0634889		0.158606	0.272905	3.10911	0.321636	0.147582		2.7577e-06	0.000532134	0.147848	0.0158293
						0.269073	0	3.19182	0.3133	0.132937		5.29242e-05	0.00045683	0.133166	0.353863		-0.269073	0	3.07816	0.324869	0.132937		4.53845e-06	0.00045683	0.133166	0.0303451		-0.0877549	0.301673	3.07416	0.325293	0.147519		9.57597e-06	0.000460685	0.14775	0.0634913		0.158149	0.272632	3.10908	0.321638	0.148114		2.75305e-06	0.000531342	0.14838	0.0158261
						0.268616	0	3.19128	0.313353	0.133394		5.29242e-05	0.00045683	0.133623	0.353863		-0.268616	0	3.07812	0.324874	0.133394		4.53845e-06	0.00045683	0.133623	0.0303451		-0.0882117	0.301614	3.07407	0.325302	0.14798		9.57177e-06	0.000460471	0.14821	0.0634929		0.157692	0.27236	3.10905	0.321641	0.148645		2.74868e-06	0.000530601	0.148911	0.0158231
						0.268159	0	3.19075	0.313406	0.133851		5.29242e-05	0.00045683	0.134079	0.353863		-0.268159	0	3.07808	0.324878	0.133851		4.53845e-06	0.00045683	0.134079	0.0303451		-0.0886685	0.301556	3.07398	0.325312	0.148441		9.56939e-06	0.000460262	0.148671	0.063506		0.157235	0.27209	3.10903	0.321644	0.149176		2.74456e-06	0.000529905	0.149441	0.0158201
						0.267702	0	3.19021	0.313459	0.134308		5.29242e-05	0.00045683	0.134536	0.353863		-0.267702	0	3.07803	0.324883	0.134308		4.53845e-06	0.00045683	0.134536	0.0303451		-0.0891254	0.3015	3.07388	0.325321	0.148901		9.57629e-06	0.000460059	0.149131	0.0635797		0.156778	0.271822	3.109	0.321647	0.149706		2.74067e-06	0.000529251	0.14997	0.0158172
						0.267245	0	3.18967	0.313512	0.134765		5.29242e-05	0.00045683	0.134993	0.353863		-0.267245	0	3.07799	0.324887	0.134765		4.53845e-06	0.00045683	0.134993	0.0303451		-0.0895822	0.301445	3.07379	0.325331	0.149361		9.57167e-06	0.000459863	0.149591	0.0635762		0.156322	0.271555	3.10898	0.321649	0.150235		2.62296e-06	0.000528635	0.150499	0.0151555
						0.266788	0	3.18913	0.313565	0.135222		5.29242e-05	0.00045683	0.13545	0.353863		-0.266788	0	3.07795	0.324892	0.135222		4.53845e-06	0.00045683	0.13545	0.0303451		-0.090039	0.301393	3.0737	0.32534	0.149821		9.3973e-06	0.000459672	0.150051	0.062444		0.155865	0.271289	3.10895	0.321652	0.150764		2.73138e-06	0.000528096	0.151028	0.0157981
						0.266332	0	3.18859	0.313618	0.135678		4.92136e-05	0.00045683	0.135907	0.329053		-0.266332	0	3.0779	0.324896	0.135678		4.02612e-06	0.00045683	0.135907	0.0269195		-0.0904958	0.301342	3.07361	0.32535	0.15028		9.16911e-06	0.000459488	0.15051	0.060952		0.155408	0.271024	3.10892	0.321655	0.151292		2.70438e-06	0.000527585	0.151555	0.0156571
						0.265875	0	3.18809	0.313667	0.136135		4.92136e-05	0.00045683	0.136364	0.329053		-0.265875	0	3.07787	0.3249	0.136135		4.02612e-06	0.00045683	0.136364	0.0269195		-0.0909527	0.301292	3.07353	0.325359	0.15074		9.16608e-06	0.000459321	0.15097	0.060954		0.154951	0.27076	3.1089	0.321657	0.151819		2.70212e-06	0.000527072	0.152083	0.0156592
						0.265418	0	3.18759	0.313716	0.136592		4.92136e-05	0.00045683	0.13682	0.329053		-0.265418	0	3.07783	0.324905	0.136592		4.02612e-06	0.00045683	0.13682	0.0269195		-0.0914095	0.301244	3.07344	0.325368	0.151199		9.16304e-06	0.000459159	0.151429	0.0609553		0.154494	0.270497	3.10887	0.32166	0.152346		2.69996e-06	0.000526585	0.15261	0.0156612
						0.264961	0	3.18709	0.313766	0.137049		4.92136e-05	0.00045683	0.137277	0.329053		-0.264961	0	3.07779	0.324909	0.137049		4.02612e-06	0.00045683	0.137277	0.0269195		-0.0918663	0.301198	3.07336	0.325377	0.151658		9.15999e-06	0.000459002	0.151888	0.0609559		0.154038	0.270235	3.10885	0.321663	0.152873		2.69791e-06	0.000526123	0.153136	0.015663
						0.264504	0	3.18659	0.313815	0.137506		4.92136e-05	0.00045683	0.137734	0.329053		-0.264504	0	3.07775	0.324913	0.137506		4.02612e-06	0.00045683	0.137734	0.0269195		-0.0923232	0.301154	3.07327	0.325386	0.152117		9.15693e-06	0.00045885	0.152347	0.0609558		0.153581	0.269974	3.10882	0.321666	0.153399		2.69595e-06	0.000525683	0.153662	0.0156647
						0.264048	0	3.18609	0.313864	0.137963		4.92136e-05	0.00045683	0.138191	0.329053		-0.264048	0	3.07771	0.324917	0.137963		4.02612e-06	0.00045683	0.138191	0.0269195		-0.09278	0.301111	3.07318	0.325396	0.152576		9.15385e-06	0.000458702	0.152806	0.0609549		0.153124	0.269714	3.10879	0.321668	0.153925		2.69408e-06	0.000525264	0.154187	0.0156664
						0.263591	0	3.18559	0.313913	0.138419		4.92136e-05	0.00045683	0.138648	0.329053		-0.263591	0	3.07767	0.324921	0.138419		4.02612e-06	0.00045683	0.138648	0.0269195		-0.0932368	0.301069	3.0731	0.325405	0.153035		9.15076e-06	0.000458559	0.153264	0.0609532		0.152667	0.269455	3.10877	0.321671	0.15445		3.29127e-06	0.000524863	0.154712	0.0191537
						0.263134	0	3.18509	0.313963	0.138876		4.92136e-05	0.00045683	0.139105	0.329053		-0.263134	0	3.07764	0.324925	0.138876		4.02612e-06	0.00045683	0.139105	0.0269195		-0.0936937	0.301029	3.07301	0.325414	0.153493		9.14766e-06	0.000458422	0.153723	0.0609509		0.15221	0.269196	3.10874	0.321674	0.154975		3.29836e-06	0.00052448	0.155237	0.019209
						0.262677	0	3.18459	0.314012	0.139333		4.92136e-05	0.00045683	0.139561	0.329053		-0.262677	0	3.0776	0.324929	0.139333		4.02612e-06	0.00045683	0.139561	0.0269195		-0.0941505	0.300991	3.07292	0.325423	0.153952		9.14454e-06	0.000458289	0.154181	0.0609477		0.151753	0.268939	3.1087	0.321678	0.155499		3.29608e-06	0.000524113	0.155761	0.0192091
						0.26222	0	3.1841	0.314061	0.13979		4.92136e-05	0.00045683	0.140018	0.329053		-0.26222	0	3.07756	0.324933	0.13979		4.02612e-06	0.00045683	0.140018	0.0269195		-0.0946073	0.300955	3.07284	0.325432	0.15441		9.008e-06	0.000458162	0.154639	0.0600543		0.151297	0.268682	3.10867	0.321681	0.156023		3.29388e-06	0.000523761	0.156285	0.0192092
						0.261763	0	3.1836	0.31411	0.140247		4.92136e-05	0.00045683	0.140475	0.329053		-0.261763	0	3.07752	0.324937	0.140247		4.02612e-06	0.00045683	0.140475	0.0269195		-0.0950641	0.30092	3.07275	0.325441	0.154868		8.7624e-06	0.00045804	0.155097	0.0584325		0.15084	0.268425	3.10864	0.321684	0.156547		3.13358e-06	0.000523423	0.156809	0.0182862
						0.261307	0	3.1831	0.314159	0.140704		4.58687e-05	0.00045683	0.140932	0.306689		-0.261307	0	3.07748	0.324941	0.140704		3.55965e-06	0.00045683	0.140932	0.0238006		-0.095521	0.300887	3.07267	0.32545	0.155326		8.75011e-06	0.000457924	0.155555	0.0583653		0.150383	0.26817	3.10861	0.321687	0.157071		3.09423e-06	0.000522993	0.157332	0.0180714
						0.26085	0	3.18263	0.314205	0.14116		4.58687e-05	0.00045683	0.141389	0.306689		-0.26085	0	3.07745	0.324944	0.14116		3.55965e-06	0.00045683	0.141389	0.0238006		-0.0959778	0.300855	3.07259	0.325459	0.155784		8.74835e-06	0.000457821	0.156013	0.0583667		0.149926	0.267915	3.10858	0.32169	0.157594		3.09149e-06	0.000522557	0.157855	0.0180705
						0.260393	0	3.18217	0.314251	0.141617		4.58687e-05	0.00045683	0.141846	0.306689		-0.260393	0	3.07742	0.324948	0.141617		3.55965e-06	0.00045683	0.141846	0.0238006		-0.0964346	0.300825	3.0725	0.325467	0.156242		8.74658e-06	0.000457723	0.156471	0.0583674		0.149469	0.267662	3.10855	0.321693	0.158116		3.63782e-06	0.000522138	0.158377	0.021281
						0.259936	0	3.1817	0.314297	0.142074		4.58687e-05	0.00045683	0.142302	0.306689		-0.259936	0	3.07738	0.324951	0.142074		3.55965e-06	0.00045683	0.142302	0.0238006		-0.0968915	0.300796	3.07242	0.325476	0.1567		8.7448e-06	0.000457629	0.156929	0.0583675		0.149012	0.267409	3.10851	0.321697	0.158638		3.67215e-06	0.000521735	0.158899	0.0214983
						0.259479	0	3.18124	0.314343	0.142531		4.58687e-05	0.00045683	0.142759	0.306689		-0.259479	0	3.07735	0.324955	0.142531		3.55965e-06	0.00045683	0.142759	0.0238006		-0.0973483	0.300769	3.07234	0.325485	0.157157		8.74301e-06	0.00045754	0.157386	0.0583669		0.148556	0.267157	3.10848	0.321701	0.15916		3.66903e-06	0.000521348	0.159421	0.0214961
						0.259022	0	3.18078	0.314389	0.142988		4.58687e-05	0.00045683	0.143216	0.306689		-0.259022	0	3.07732	0.324959	0.142988		3.55965e-06	0.00045683	0.143216	0.0238006		-0.0978051	0.300744	3.07226	0.325494	0.157615		8.74122e-06	0.000457456	0.157844	0.0583657		0.148099	0.266906	3.10844	0.321704	0.159681		3.66603e-06	0.000520976	0.159942	0.0214938
						0.258566	0	3.18031	0.314435	0.143444		4.58687e-05	0.00045683	0.143673	0.306689		-0.258566	0	3.07728	0.324962	0.143444		3.55965e-06	0.00045683	0.143673	0.0238006		-0.0982619	0.30072	3.07217	0.325502	0.158072		8.73941e-06	0.000457377	0.158301	0.0583637		0.147642	0.266655	3.10841	0.321708	0.160202		3.66312e-06	0.000520617	0.160463	0.0214916
						0.258109	0	3.17985	0.31448	0.143901		4.58687e-05	0.00045683	0.14413	0.306689		-0.258109	0	3.07725	0.324966	0.143901		3.55965e-06	0.00045683	0.14413	0.0238006		-0.0987188	0.300697	3.07209	0.325511	0.15853		8.7376e-06	0.000457303	0.158758	0.0583611		0.147185	0.266405	3.10837	0.321712	0.160723		3.37892e-06	0.00052027	0.160983	0.0198374
						0.257652	0	3.17938	0.314526	0.144358		4.58687e-05	0.00045683	0.144587	0.306689		-0.257652	0	3.07721	0.324969	0.144358		3.55965e-06	0.00045683	0.144587	0.0238006		-0.0991756	0.300677	3.07201	0.32552	0.158987		8.73577e-06	0.000457234	0.159216	0.0583577		0.146728	0.266156	3.10834	0.321715	0.161243		3.25925e-06	0.000520014	0.161503	0.0191442
						0.257195	0	3.17892	0.314572	0.144815		4.58687e-05	0.00045683	0.145043	0.306689		-0.257195	0	3.07718	0.324973	0.144815		3.55965e-06	0.00045683	0.145043	0.0238006		-0.0996324	0.300657	3.07193	0.325529	0.159444		8.41178e-06	0.00045717	0.159673	0.0562013		0.146271	0.265908	3.10831	0.321718	0.161763		3.7272e-06	0.0005198	0.162023	0.0219019
						0.256738	0	3.17846	0.314618	0.145272		4.58687e-05	0.00045683	0.1455	0.306689		-0.256738	0	3.07715	0.324976	0.145272		3.55965e-06	0.00045683	0.1455	0.0238006		-0.100089	0.30064	3.07185	0.325537	0.159902		8.39299e-06	0.000457111	0.16013	0.0560829		0.145815	0.26566	3.10827	0.321722	0.162283		3.67922e-06	0.000519591	0.162543	0.0216286
						0.256281	0	3.17799	0.314664	0.145729		4.28448e-05	0.00045683	0.145957	0.28647		-0.256281	0	3.07711	0.32498	0.145729		3.13295e-06	0.00045683	0.145957	0.0209476		-0.100546	0.300624	3.07177	0.325545	0.160359		8.3543e-06	0.000457058	0.160587	0.0558309		0.145358	0.265412	3.10824	0.321726	0.162803		3.64441e-06	0.000519297	0.163062	0.0214362
						0.255825	0	3.17756	0.314707	0.146185		4.28448e-05	0.00045683	0.146414	0.28647		-0.255825	0	3.07708	0.324983	0.146185		3.13295e-06	0.00045683	0.146414	0.0209476		-0.101003	0.300609	3.07169	0.325554	0.160816		8.35364e-06	0.000457013	0.161044	0.0558319		0.144901	0.265166	3.1082	0.321729	0.163322		3.64243e-06	0.000518991	0.163581	0.0214371
						0.255368	0	3.17713	0.31475	0.146642		4.28448e-05	0.00045683	0.146871	0.28647		-0.255368	0	3.07705	0.324986	0.146642		3.13295e-06	0.00045683	0.146871	0.0209476		-0.10146	0.300596	3.07161	0.325562	0.161273		8.35298e-06	0.000456973	0.161501	0.0558323		0.144444	0.264919	3.10817	0.321733	0.163841		3.6405e-06	0.000518694	0.1641	0.0214381
						0.254911	0	3.1767	0.314792	0.147099		4.28448e-05	0.00045683	0.147328	0.28647		-0.254911	0	3.07702	0.324989	0.147099		3.13295e-06	0.00045683	0.147328	0.0209476		-0.101917	0.300585	3.07153	0.325571	0.16173		8.35231e-06	0.000456938	0.161958	0.0558322		0.143987	0.264674	3.10813	0.321737	0.16436		3.63864e-06	0.000518408	0.164619	0.0214389
						0.254454	0	3.17626	0.314835	0.147556		4.28448e-05	0.00045683	0.147784	0.28647		-0.254454	0	3.07699	0.324992	0.147556		3.13295e-06	0.00045683	0.147784	0.0209476		-0.102373	0.300575	3.07145	0.325579	0.162187		8.35164e-06	0.000456908	0.162415	0.0558314		0.14353	0.264429	3.1081	0.32174	0.164878		3.63683e-06	0.00051813	0.165137	0.0214397
						0.253997	0	3.17583	0.314878	0.148013		4.28448e-05	0.00045683	0.148241	0.28647		-0.253997	0	3.07696	0.324996	0.148013		3.13295e-06	0.00045683	0.148241	0.0209476		-0.10283	0.300566	3.07137	0.325587	0.162644		8.35096e-06	0.000456882	0.162872	0.05583		0.143074	0.264184	3.10806	0.321744	0.165396		4.00505e-06	0.00051786	0.165655	0.0236228
						0.25354	0	3.1754	0.314921	0.14847		4.28448e-05	0.00045683	0.148698	0.28647		-0.25354	0	3.07694	0.324999	0.14847		3.13295e-06	0.00045683	0.148698	0.0209476		-0.103287	0.300559	3.07129	0.325596	0.1631		8.35028e-06	0.000456862	0.163329	0.055828		0.142617	0.26394	3.10802	0.321748	0.165914		4.17503e-06	0.000517598	0.166173	0.0246378
						0.253084	0	3.17497	0.314964	0.148926		4.28448e-05	0.00045683	0.149155	0.28647		-0.253084	0	3.07691	0.325002	0.148926		3.13295e-06	0.00045683	0.149155	0.0209476		-0.103744	0.300554	3.07122	0.325604	0.163557		8.3496e-06	0.000456846	0.163786	0.0558253		0.14216	0.263697	3.10798	0.321752	0.166432		4.17294e-06	0.000517343	0.16669	0.0246376
						0.252627	0	3.17454	0.315007	0.149383		4.28448e-05	0.00045683	0.149612	0.28647		-0.252627	0	3.07688	0.325005	0.149383		3.13295e-06	0.00045683	0.149612	0.0209476		-0.104201	0.30055	3.07114	0.325612	0.164014		8.29042e-06	0.000456836	0.164243	0.0554309		0.141703	0.263454	3.10794	0.321756	0.166949		4.17091e-06	0.000517096	0.167208	0.0246374
						0.25217	0	3.1741	0.31505	0.14984		4.28448e-05	0.00045683	0.150069	0.28647		-0.25217	0	3.07685	0.325008	0.14984		3.13295e-06	0.00045683	0.150069	0.0209476		-0.104658	0.300548	3.07106	0.325621	0.164471		8.04948e-06	0.00045683	0.164699	0.0538206		0.141246	0.263212	3.1079	0.321761	0.167466		4.16893e-06	0.000516855	0.167725	0.0246372
						0.251713	0	3.17367	0.315092	0.150297		4.28448e-05	0.00045683	0.150525	0.28647		-0.251713	0	3.07682	0.325011	0.150297		3.13295e-06	0.00045683	0.150525	0.0209476		-0.105114	0.300547	3.07098	0.325629	0.164928		8.04317e-06	0.00045683	0.165156	0.0537784		0.140789	0.26297	3.10786	0.321765	0.167983		4.04149e-06	0.000516621	0.168241	0.0238949
						0.251256	0	3.17324	0.315135	0.150754		4.01035e-05	0.00045683	0.150982	0.268141		-0.251256	0	3.07679	0.325014	0.150754		2.74088e-06	0.00045683	0.150982	0.0183261		-0.105571	0.300548	3.07091	0.325637	0.165385		7.98059e-06	0.000456836	0.165613	0.0533594		0.140333	0.262729	3.10782	0.321769	0.1685		4.00984e-06	0.00051631	0.168758	0.0237221
						0.250799	0	3.17284	0.315175	0.151211		4.01035e-05	0.00045683	0.151439	0.268141		-0.250799	0	3.07676	0.325017	0.151211		2.74088e-06	0.00045683	0.151439	0.0183261		-0.106028	0.30055	3.07083	0.325645	0.165841		7.9809e-06	0.000456845	0.16607	0.0533602		0.139876	0.262488	3.10778	0.321773	0.169016		4.26267e-06	0.000515989	0.169274	0.0252334
						0.250343	0	3.17243	0.315215	0.151667		4.01035e-05	0.00045683	0.151896	0.268141		-0.250343	0	3.07674	0.32502	0.151667		2.74088e-06	0.00045683	0.151896	0.0183261		-0.106485	0.300554	3.07076	0.325653	0.166298		7.9812e-06	0.00045686	0.166527	0.0533606		0.139419	0.262248	3.10774	0.321777	0.169532		4.5233e-06	0.000515678	0.16979	0.0267925
						0.249886	0	3.17203	0.315256	0.152124		4.01035e-05	0.00045683	0.152353	0.268141		-0.249886	0	3.07671	0.325023	0.152124		2.74088e-06	0.00045683	0.152353	0.0183261		-0.106942	0.300559	3.07068	0.325661	0.166755		7.9815e-06	0.000456879	0.166984	0.0533603		0.138962	0.262009	3.1077	0.321782	0.170048		4.5203e-06	0.000515375	0.170305	0.0267904
						0.249429	0	3.17163	0.315296	0.152581		4.01035e-05	0.00045683	0.15281	0.268141		-0.249429	0	3.07668	0.325025	0.152581		2.74088e-06	0.00045683	0.15281	0.0183261		-0.107399	0.300566	3.07061	0.325669	0.167212		7.98181e-06	0.000456903	0.167441	0.0533596		0.138505	0.26177	3.10766	0.321786	0.170563		4.51738e-06	0.000515081	0.17082	0.0267884
						0.248972	0	3.17122	0.315336	0.153038		4.01035e-05	0.00045683	0.153266	0.268141		-0.248972	0	3.07666	0.325028	0.153038		2.74088e-06	0.00045683	0.153266	0.0183261		-0.107855	0.300574	3.07053	0.325677	0.167669		7.98212e-06	0.000456932	0.167897	0.0533582		0.138048	0.261533	3.10761	0.321791	0.171078		4.4972e-06	0.000514794	0.171335	0.0266836
						0.248515	0	3.17082	0.315376	0.153495		4.01035e-05	0.00045683	0.153723	0.268141		-0.248515	0	3.07663	0.325031	0.153495		2.74088e-06	0.00045683	0.153723	0.0183261		-0.108312	0.300584	3.07046	0.325685	0.168126		7.98243e-06	0.000456967	0.168354	0.0533563		0.137592	0.261295	3.10757	0.321795	0.171593		4.15033e-06	0.00051452	0.17185	0.0246386
						0.248058	0	3.17042	0.315416	0.153952		4.01035e-05	0.00045683	0.15418	0.268141		-0.248058	0	3.07661	0.325034	0.153952		2.74088e-06	0.00045683	0.15418	0.0183261		-0.108769	0.300595	3.07038	0.325693	0.168583		7.98274e-06	0.000457006	0.168811	0.0533538		0.137135	0.261058	3.10753	0.321799	0.172107		4.14907e-06	0.000514331	0.172365	0.0246402
						0.247602	0	3.17001	0.315456	0.154408		4.01035e-05	0.00045683	0.154637	0.268141		-0.247602	0	3.07658	0.325036	0.154408		2.74088e-06	0.00045683	0.154637	0.0183261		-0.109226	0.300608	3.07031	0.325701	0.16904		7.97382e-06	0.000457051	0.169268	0.053289		0.136678	0.260822	3.10749	0.321803	0.172622		4.27567e-06	0.000514147	0.172879	0.0254011
						0.247145	0	3.16961	0.315496	0.154865		4.01035e-05	0.00045683	0.155094	0.268141		-0.247145	0	3.07655	0.325039	0.154865		2.74088e-06	0.00045683	0.155094	0.0183261		-0.109683	0.300622	3.07023	0.325708	0.169497		7.7197e-06	0.000457101	0.169725	0.051585		0.136221	0.260586	3.10745	0.321808	0.173136		4.64518e-06	0.000513967	0.173393	0.0276059
						0.246688	0	3.16921	0.315536	0.155322		4.01035e-05	0.00045683	0.15555	0.268141		-0.246688	0	3.07653	0.325042	0.155322		2.74088e-06	0.00045683	0.15555	0.0183261		-0.11014	0.300638	3.07016	0.325716	0.169954		7.71196e-06	0.000457156	0.170183	0.051527		0.135764	0.260351	3.1074	0.321812	0.17365		4.53324e-06	0.000513791	0.173907	0.0269499
						0.246231	0	3.16881	0.315576	0.155779		3.7612e-05	0.00045683	0.156007	0.251482		-0.246231	0	3.0765	0.325045	0.155779		2.37907e-06	0.00045683	0.156007	0.015907		-0.110596	0.300655	3.07008	0.325724	0.170411		7.62802e-06	0.000457217	0.17064	0.0509595		0.135307	0.260116	3.10736	0.321817	0.174164		4.5056e-06	0.000513544	0.17442	0.0267985
						0.245774	0	3.16843	0.315614	0.156236		3.7612e-05	0.00045683	0.156464	0.251482		-0.245774	0	3.07648	0.325047	0.156236		2.37907e-06	0.00045683	0.156464	0.015907		-0.111053	0.300674	3.07001	0.325732	0.170868		7.62917e-06	0.000457277	0.171097	0.0509604		0.134851	0.259881	3.10731	0.321821	0.174677		4.50346e-06	0.000513287	0.174934	0.0267992
						0.245317	0	3.16805	0.315652	0.156693		3.7612e-05	0.00045683	0.156921	0.251482		-0.245317	0	3.07646	0.325049	0.156693		2.37907e-06	0.00045683	0.156921	0.015907		-0.11151	0.300694	3.06994	0.325739	0.171326		7.63032e-06	0.000457343	0.171554	0.0509608		0.134394	0.259647	3.10727	0.321826	0.17519		4.50138e-06	0.000513036	0.175447	0.0267999
						0.244861	0	3.16767	0.315689	0.157149		3.7612e-05	0.00045683	0.157378	0.251482		-0.244861	0	3.07643	0.325052	0.157149		2.37907e-06	0.00045683	0.157378	0.015907		-0.111967	0.300716	3.06987	0.325747	0.171783		7.63148e-06	0.000457414	0.172012	0.0509607		0.133937	0.259413	3.10723	0.32183	0.175703		4.49934e-06	0.000512792	0.17596	0.0268005
						0.244404	0	3.1673	0.315727	0.157606		3.7612e-05	0.00045683	0.157835	0.251482		-0.244404	0	3.07641	0.325054	0.157606		2.37907e-06	0.00045683	0.157835	0.015907		-0.112424	0.300739	3.0698	0.325754	0.17224		7.63265e-06	0.000457489	0.172469	0.0509601		0.13348	0.259181	3.10718	0.321835	0.176216		4.49734e-06	0.000512553	0.176473	0.0268011
						0.243947	0	3.16692	0.315764	0.158063		3.7612e-05	0.00045683	0.158291	0.251482		-0.243947	0	3.07639	0.325056	0.158063		2.37907e-06	0.00045683	0.158291	0.015907		-0.11288	0.300763	3.06972	0.325762	0.172698		7.63383e-06	0.00045757	0.172927	0.0509589		0.133023	0.258948	3.10714	0.321839	0.176729		4.96208e-06	0.00051232	0.176985	0.0295841
						0.24349	0	3.16654	0.315802	0.15852		3.7612e-05	0.00045683	0.158748	0.251482		-0.24349	0	3.07637	0.325059	0.15852		2.37907e-06	0.00045683	0.158748	0.015907		-0.113337	0.300789	3.06965	0.32577	0.173155		7.63502e-06	0.000457656	0.173384	0.0509572		0.132567	0.258716	3.10709	0.321844	0.177241		4.96788e-06	0.000512092	0.177497	0.0296318
						0.243033	0	3.16616	0.31584	0.158977		3.7612e-05	0.00045683	0.159205	0.251482		-0.243033	0	3.07634	0.325061	0.158977		2.37907e-06	0.00045683	0.159205	0.015907		-0.113794	0.300817	3.06958	0.325777	0.173613		7.63622e-06	0.000457748	0.173842	0.050955		0.13211	0.258485	3.10704	0.321849	0.177753		4.96568e-06	0.00051187	0.178009	0.0296315
						0.242577	0	3.16579	0.315877	0.159434		3.7612e-05	0.00045683	0.159662	0.251482		-0.242577	0	3.07632	0.325064	0.159434		2.37907e-06	0.00045683	0.159662	0.015907		-0.114251	0.300846	3.06951	0.325785	0.174071		7.63742e-06	0.000457845	0.1743	0.0509522		0.131653	0.258254	3.107	0.321854	0.178265		4.96352e-06	0.000511653	0.178521	0.0296312
						0.24212	0	3.16541	0.315915	0.15989		3.7612e-05	0.00045683	0.160119	0.251482		-0.24212	0	3.0763	0.325066	0.15989		2.37907e-06	0.00045683	0.160119	0.015907		-0.114708	0.300876	3.06944	0.325793	0.174529		7.53748e-06	0.000457948	0.174758	0.0502742		0.131196	0.258024	3.10695	0.321859	0.178777		4.9614e-06	0.00051144	0.179032	0.0296309
						0.241663	0	3.16503	0.315952	0.160347		3.7612e-05	0.00045683	0.160576	0.251482		-0.241663	0	3.07628	0.325068	0.160347		2.37907e-06	0.00045683	0.160576	0.015907		-0.115165	0.300908	3.06937	0.3258	0.174987		7.39849e-06	0.000458057	0.175216	0.0493355		0.130739	0.257794	3.1069	0.321864	0.179288		4.8657e-06	0.000511232	0.179544	0.0290712
						0.241206	0	3.16466	0.31599	0.160804		3.53421e-05	0.00045683	0.161032	0.236305		-0.241206	0	3.07625	0.325071	0.160804		2.04376e-06	0.00045683	0.161032	0.013665		-0.115621	0.300942	3.0693	0.325808	0.175445		7.29576e-06	0.00045817	0.175674	0.0486384		0.130282	0.257564	3.10685	0.321869	0.179799		4.8413e-06	0.000510961	0.180055	0.0289407
						0.240749	0	3.1643	0.316025	0.161261		3.53421e-05	0.00045683	0.161489	0.236305		-0.240749	0	3.07623	0.325073	0.161261		2.04376e-06	0.00045683	0.161489	0.013665		-0.116078	0.300977	3.06923	0.325815	0.175903		7.29765e-06	0.000458279	0.176132	0.0486394		0.129826	0.257335	3.10681	0.321874	0.18031		5.14015e-06	0.00051068	0.180566	0.0307441
						0.240292	0	3.16395	0.316061	0.161718		3.53421e-05	0.00045683	0.161946	0.236305		-0.240292	0	3.07622	0.325075	0.161718		2.04376e-06	0.00045683	0.161946	0.013665		-0.116535	0.301013	3.06916	0.325822	0.176361		7.29955e-06	0.000458394	0.17659	0.0486399		0.129369	0.257107	3.10676	0.321879	0.180821		5.28555e-06	0.000510406	0.181076	0.0316308
						0.239836	0	3.16359	0.316096	0.162175		3.53421e-05	0.00045683	0.162403	0.236305		-0.239836	0	3.0762	0.325077	0.162175		2.04376e-06	0.00045683	0.162403	0.013665		-0.116992	0.301051	3.06909	0.325829	0.17682		7.30147e-06	0.000458513	0.177049	0.0486401		0.128912	0.256879	3.10671	0.321884	0.181331		5.28247e-06	0.000510138	0.181587	0.0316289
						0.239379	0	3.16324	0.316131	0.162631		3.53421e-05	0.00045683	0.16286	0.236305		-0.239379	0	3.07618	0.325079	0.162631		2.04376e-06	0.00045683	0.16286	0.013665		-0.117449	0.30109	3.06902	0.325837	0.177278		7.30341e-06	0.000458638	0.177507	0.0486397		0.128455	0.256652	3.10666	0.32189	0.181842		5.27945e-06	0.000509877	0.182097	0.031627
						0.238922	0	3.16289	0.316167	0.163088		3.53421e-05	0.00045683	0.163317	0.236305		-0.238922	0	3.07616	0.325081	0.163088		2.04376e-06	0.00045683	0.163317	0.013665		-0.117906	0.301131	3.06895	0.325844	0.177737		7.30536e-06	0.000458769	0.177966	0.0486388		0.127998	0.256426	3.1066	0.321895	0.182351		5.15939e-06	0.000509621	0.182606	0.0309234
						0.238465	0	3.16253	0.316202	0.163545		3.53421e-05	0.00045683	0.163773	0.236305		-0.238465	0	3.07614	0.325083	0.163545		2.04376e-06	0.00045683	0.163773	0.013665		-0.118362	0.301173	3.06888	0.325851	0.178195		7.30733e-06	0.000458905	0.178425	0.0486375		0.127541	0.2562	3.10655	0.3219	0.182861		4.95005e-06	0.000509394	0.183116	0.0296818
						0.238008	0	3.16218	0.316237	0.164002		3.53421e-05	0.00045683	0.16423	0.236305		-0.238008	0	3.07612	0.325085	0.164002		2.04376e-06	0.00045683	0.16423	0.013665		-0.118819	0.301217	3.06882	0.325859	0.178654		7.30931e-06	0.000459047	0.178884	0.0486357		0.127085	0.255975	3.10651	0.321905	0.18337		4.94853e-06	0.000509213	0.183625	0.0296833
						0.237551	0	3.16183	0.316273	0.164459		3.53421e-05	0.00045683	0.164687	0.236305		-0.237551	0	3.0761	0.325087	0.164459		2.04376e-06	0.00045683	0.164687	0.013665		-0.119276	0.301262	3.06875	0.325866	0.179113		7.31131e-06	0.000459194	0.179343	0.0486333		0.126628	0.25575	3.10646	0.32191	0.18388		5.08241e-06	0.000509036	0.184134	0.0304969
						0.237095	0	3.16147	0.316308	0.164915		3.53421e-05	0.00045683	0.165144	0.236305		-0.237095	0	3.07608	0.325089	0.164915		2.04376e-06	0.00045683	0.165144	0.013665		-0.119733	0.301308	3.06868	0.325873	0.179573		7.31332e-06	0.000459348	0.179802	0.0486304		0.126171	0.255525	3.10641	0.321915	0.184389		5.37713e-06	0.000508863	0.184643	0.0322764
						0.236638	0	3.16112	0.316344	0.165372		3.53421e-05	0.00045683	0.165601	0.236305		-0.236638	0	3.07606	0.325091	0.165372		2.04376e-06	0.00045683	0.165601	0.013665		-0.12019	0.301356	3.06861	0.325881	0.180032		7.23109e-06	0.000459508	0.180262	0.0480669		0.125714	0.255301	3.10636	0.32192	0.184898		5.29514e-06	0.000508692	0.185152	0.0317949
						0.236181	0	3.16077	0.316379	0.165829		3.32693e-05	0.00045683	0.166058	0.222446		-0.236181	0	3.07604	0.325093	0.165829		1.73174e-06	0.00045683	0.166058	0.0115788		-0.120647	0.301406	3.06854	0.325888	0.180491		6.98304e-06	0.000459673	0.180721	0.0464014		0.125257	0.255077	3.10631	0.321926	0.185406		5.27428e-06	0.000508464	0.185661	0.0316839
						0.235724	0	3.16044	0.316412	0.166286		3.32693e-05	0.00045683	0.166514	0.222446		-0.235724	0	3.07602	0.325095	0.166286		1.73174e-06	0.00045683	0.166514	0.0115788		-0.121103	0.301457	3.06847	0.325895	0.180951		6.98604e-06	0.000459829	0.181181	0.0464056		0.1248	0.254854	3.10626	0.321931	0.185915		5.27192e-06	0.000508225	0.186169	0.0316846
						0.235267	0	3.1601	0.316445	0.166743		3.32693e-05	0.00045683	0.166971	0.222446		-0.235267	0	3.07601	0.325097	0.166743		1.73174e-06	0.00045683	0.166971	0.0115788		-0.12156	0.301509	3.06841	0.325902	0.181411		7.00054e-06	0.00045999	0.181641	0.0464856		0.124344	0.254631	3.10621	0.321936	0.186423		5.26962e-06	0.000507992	0.186677	0.0316852
						0.23481	0	3.15977	0.316479	0.1672		3.32693e-05	0.00045683	0.167428	0.222446		-0.23481	0	3.07599	0.325098	0.1672		1.73174e-06	0.00045683	0.167428	0.0115788		-0.122017	0.301563	3.06834	0.325909	0.181871		7.00344e-06	0.000460156	0.182101	0.046488		0.123887	0.254409	3.10615	0.321941	0.186931		5.26736e-06	0.000507764	0.187185	0.0316859
						0.234354	0	3.15944	0.316512	0.167656		3.32693e-05	0.00045683	0.167885	0.222446		-0.234354	0	3.07598	0.3251	0.167656		1.73174e-06	0.00045683	0.167885	0.0115788		-0.122474	0.301619	3.06828	0.325916	0.182331		7.00637e-06	0.000460328	0.182561	0.0464901		0.12343	0.254187	3.1061	0.321947	0.187439		5.26514e-06	0.000507541	0.187692	0.0316865
						0.233897	0	3.15911	0.316545	0.168113		3.32693e-05	0.00045683	0.168342	0.222446		-0.233897	0	3.07596	0.325102	0.168113		1.73174e-06	0.00045683	0.168342	0.0115788		-0.122931	0.301675	3.06821	0.325923	0.182791		7.00933e-06	0.000460506	0.183022	0.0464918		0.122973	0.253966	3.10605	0.321952	0.187946		5.63644e-06	0.000507323	0.1882	0.0339356
						0.23344	0	3.15877	0.316578	0.16857		3.32693e-05	0.00045683	0.168799	0.222446		-0.23344	0	3.07594	0.325104	0.16857		1.73174e-06	0.00045683	0.168799	0.0115788		-0.123388	0.301733	3.06815	0.32593	0.183252		7.01231e-06	0.00046069	0.183482	0.046493		0.122516	0.253746	3.106	0.321958	0.188454		5.6669e-06	0.000507109	0.188707	0.0341334
						0.232983	0	3.15844	0.316612	0.169027		3.32693e-05	0.00045683	0.169255	0.222446		-0.232983	0	3.07593	0.325105	0.169027		1.73174e-06	0.00045683	0.169255	0.0115788		-0.123844	0.301793	3.06808	0.325937	0.183713		7.01531e-06	0.000460879	0.183943	0.0464938		0.122059	0.253525	3.10594	0.321963	0.188961		5.66452e-06	0.000506899	0.189214	0.0341332
						0.232526	0	3.15811	0.316645	0.169484		3.32693e-05	0.00045683	0.169712	0.222446		-0.232526	0	3.07591	0.325107	0.169484		1.73174e-06	0.00045683	0.169712	0.0115788		-0.124301	0.301854	3.06801	0.325944	0.184174		7.01835e-06	0.000461076	0.184404	0.0464941		0.121603	0.253306	3.10589	0.321969	0.189468		5.66218e-06	0.000506693	0.189721	0.0341329
						0.232069	0	3.15778	0.316678	0.169941		3.32693e-05	0.00045683	0.170169	0.222446		-0.232069	0	3.07589	0.325109	0.169941		1.73174e-06	0.00045683	0.170169	0.0115788		-0.124758	0.301916	3.06795	0.325951	0.184635		7.02141e-06	0.000461278	0.184865	0.046494		0.121146	0.253087	3.10583	0.321975	0.189974		5.65987e-06	0.000506492	0.190228	0.0341326
						0.231613	0	3.15745	0.316712	0.170397		3.32693e-05	0.00045683	0.170626	0.222446		-0.231613	0	3.07588	0.32511	0.170397		1.73174e-06	0.00045683	0.170626	0.0115788		-0.125215	0.30198	3.06788	0.325958	0.185096		7.0093e-06	0.000461487	0.185327	0.0463928		0.120689	0.252868	3.10578	0.32198	0.190481		5.59408e-06	0.000506294	0.190734	0.033749
						0.231156	0	3.15712	0.316745	0.170854		3.13724e-05	0.00045683	0.171083	0.209763		-0.231156	0	3.07586	0.325112	0.170854		1.44023e-06	0.00045683	0.171083	0.00962974		-0.125672	0.302045	3.06781	0.325965	0.185557		6.86828e-06	0.000461701	0.185788	0.0454384		0.120232	0.25265	3.10573	0.321986	0.190987		5.57648e-06	0.000506043	0.19124	0.0336595
						0.230699	0	3.1568	0.316776	0.171311		3.13724e-05	0.00045683	0.17154	0.209763		-0.230699	0	3.07585	0.325114	0.171311		1.44023e-06	0.00045683	0.17154	0.00962974		-0.126129	0.302112	3.06775	0.325972	0.186019		6.75078e-06	0.000461901	0.18625	0.0446416		0.119775	0.252432	3.10567	0.321991	0.191493		5.75766e-06	0.000505784	0.191746	0.034771
						0.230242	0	3.15649	0.316808	0.171768		3.13724e-05	0.00045683	0.171996	0.209763		-0.230242	0	3.07583	0.325115	0.171768		1.44023e-06	0.00045683	0.171996	0.00962974		-0.126585	0.302181	3.06769	0.325979	0.186481		6.71e-06	0.000462107	0.186712	0.0443522		0.119318	0.252215	3.10562	0.321997	0.191999		5.95086e-06	0.00050553	0.192252	0.0359557
						0.229785	0	3.15618	0.316839	0.172225		3.13724e-05	0.00045683	0.172453	0.209763		-0.229785	0	3.07582	0.325117	0.172225		1.44023e-06	0.00045683	0.172453	0.00962974		-0.127042	0.30225	3.06762	0.325985	0.186943		6.71348e-06	0.000462319	0.187174	0.0443548		0.118862	0.251998	3.10556	0.322003	0.192504		5.94766e-06	0.000505281	0.192757	0.0359541
						0.229328	0	3.15587	0.31687	0.172682		3.13724e-05	0.00045683	0.17291	0.209763		-0.229328	0	3.07581	0.325118	0.172682		1.44023e-06	0.00045683	0.17291	0.00962974		-0.127499	0.302321	3.06756	0.325992	0.187405		6.71699e-06	0.000462537	0.187637	0.0443571		0.118405	0.251782	3.1055	0.322009	0.19301		5.94453e-06	0.000505038	0.193262	0.0359525
						0.228872	0	3.15555	0.316902	0.173138		3.13724e-05	0.00045683	0.173367	0.209763		-0.228872	0	3.07579	0.325119	0.173138		1.44023e-06	0.00045683	0.173367	0.00962974		-0.127956	0.302394	3.0675	0.325999	0.187868		6.72053e-06	0.000462762	0.188099	0.044359		0.117948	0.251567	3.10544	0.322015	0.193515		5.94144e-06	0.000504799	0.193767	0.0359508
						0.228415	0	3.15524	0.316933	0.173595		3.13724e-05	0.00045683	0.173824	0.209763		-0.228415	0	3.07578	0.325121	0.173595		1.44023e-06	0.00045683	0.173824	0.00962974		-0.128413	0.302468	3.06743	0.326005	0.188331		6.72411e-06	0.000462993	0.188562	0.0443604		0.117491	0.251352	3.10539	0.322021	0.19402		5.78034e-06	0.000504565	0.194272	0.0349922
						0.227958	0	3.15493	0.316964	0.174052		3.13724e-05	0.00045683	0.17428	0.209763		-0.227958	0	3.07577	0.325122	0.174052		1.44023e-06	0.00045683	0.17428	0.00962974		-0.12887	0.302543	3.06737	0.326012	0.188794		6.72772e-06	0.00046323	0.189025	0.0443615		0.117034	0.251138	3.10533	0.322027	0.194524		5.65008e-06	0.000504364	0.194776	0.0342173
						0.227501	0	3.15462	0.316996	0.174509		3.13724e-05	0.00045683	0.174737	0.209763		-0.227501	0	3.07575	0.325124	0.174509		1.44023e-06	0.00045683	0.174737	0.00962974		-0.129326	0.30262	3.06731	0.326019	0.189257		6.73136e-06	0.000463475	0.189489	0.0443621		0.116577	0.250924	3.10528	0.322032	0.195028		5.64976e-06	0.000504188	0.195281	0.0342273
						0.227044	0	3.1543	0.317027	0.174966		3.13724e-05	0.00045683	0.175194	0.209763		-0.227044	0	3.07574	0.325125	0.174966		1.44023e-06	0.00045683	0.175194	0.00962974		-0.129783	0.302698	3.06724	0.326026	0.18972		6.73504e-06	0.000463726	0.189952	0.0443623		0.116121	0.250711	3.10522	0.322038	0.195533		6.01085e-06	0.000504017	0.195785	0.0364273
						0.226587	0	3.15399	0.317059	0.175423		3.13724e-05	0.00045683	0.175651	0.209763		-0.226587	0	3.07572	0.325127	0.175423		1.44023e-06	0.00045683	0.175651	0.00962974		-0.13024	0.302778	3.06718	0.326032	0.190184		6.72219e-06	0.000463984	0.190416	0.044253		0.115664	0.250498	3.10516	0.322044	0.196037		5.95657e-06	0.000503848	0.196289	0.0361104
						0.226131	0	3.15368	0.31709	0.175879		2.96328e-05	0.00045683	0.176108	0.198132		-0.226131	0	3.07571	0.325128	0.175879		1.16684e-06	0.00045683	0.176108	0.00780172		-0.130697	0.302859	3.06712	0.326039	0.190648		6.56882e-06	0.000464247	0.19088	0.0432189		0.115207	0.250285	3.10511	0.32205	0.196541		5.94199e-06	0.00050363	0.196792	0.0360376
						0.225674	0	3.15338	0.31712	0.176336		2.96328e-05	0.00045683	0.176565	0.198132		-0.225674	0	3.0757	0.325129	0.176336		1.16684e-06	0.00045683	0.176565	0.00780172		-0.131154	0.302941	3.06706	0.326046	0.191112		6.57223e-06	0.000464492	0.191345	0.0432185		0.11475	0.250073	3.10505	0.322056	0.197044		5.93946e-06	0.000503403	0.197296	0.0360385
						0.225217	0	3.15309	0.317149	0.176793		2.96328e-05	0.00045683	0.177021	0.198132		-0.225217	0	3.07569	0.32513	0.176793		1.16684e-06	0.00045683	0.177021	0.00780172		-0.131611	0.303025	3.06699	0.326052	0.191577		6.57566e-06	0.000464743	0.191809	0.0432177		0.114293	0.249862	3.10499	0.322062	0.197548		5.93697e-06	0.000503182	0.197799	0.0360392
						0.22476	0	3.1528	0.317179	0.17725		2.96328e-05	0.00045683	0.177478	0.198132		-0.22476	0	3.07568	0.325132	0.17725		1.16684e-06	0.00045683	0.177478	0.00780172		-0.132067	0.303111	3.06693	0.326059	0.192042		6.51146e-06	0.000465001	0.192274	0.042772		0.113837	0.249651	3.10494	0.322068	0.198051		5.93453e-06	0.000502964	0.198302	0.03604
						0.224303	0	3.1525	0.317208	0.177707		2.96328e-05	0.00045683	0.177935	0.198132		-0.224303	0	3.07567	0.325133	0.177707		1.16684e-06	0.00045683	0.177935	0.00780172		-0.132524	0.303198	3.06687	0.326065	0.192507		6.44472e-06	0.000465265	0.192739	0.0423096		0.11338	0.249441	3.10488	0.322074	0.198554		5.93213e-06	0.000502751	0.198805	0.0360407
						0.223847	0	3.15221	0.317238	0.178164		2.96328e-05	0.00045683	0.178392	0.198132		-0.223847	0	3.07566	0.325134	0.178164		1.16684e-06	0.00045683	0.178392	0.00780172		-0.132981	0.303286	3.06681	0.326072	0.192972		6.4488e-06	0.000465536	0.193205	0.0423117		0.112923	0.249231	3.10482	0.32208	0.199056		6.0931e-06	0.000502542	0.199308	0.0370341
						0.22339	0	3.15191	0.317268	0.17862		2.96328e-05	0.00045683	0.178849	0.198132		-0.22339	0	3.07564	0.325135	0.17862		1.16684e-06	0.00045683	0.178849	0.00780172		-0.133438	0.303375	3.06675	0.326078	0.193437		6.45291e-06	0.000465814	0.19367	0.0423134		0.112466	0.249021	3.10476	0.322086	0.199559		6.26541e-06	0.000502336	0.19981	0.038097
						0.222933	0	3.15162	0.317297	0.179077		2.96328e-05	0.00045683	0.179306	0.198132		-0.222933	0	3.07563	0.325136	0.179077		1.16684e-06	0.00045683	0.179306	0.00780172		-0.133895	0.303466	3.06669	0.326085	0.193903		6.45706e-06	0.0004661	0.194136	0.0423147		0.112009	0.248812	3.1047	0.322092	0.200061		6.26288e-06	0.000502135	0.200312	0.0380969
						0.222476	0	3.15132	0.317327	0.179534		2.96328e-05	0.00045683	0.179762	0.198132		-0.222476	0	3.07562	0.325137	0.179534		1.16684e-06	0.00045683	0.179762	0.00780172		-0.134351	0.303559	3.06663	0.326091	0.194369		6.46126e-06	0.000466392	0.194603	0.0423157		0.111552	0.248604	3.10464	0.322098	0.200563		6.2604e-06	0.000501937	0.200814	0.0380968
						0.222019	0	3.15103	0.317357	0.179991		2.96328e-05	0.00045683	0.180219	0.198132		-0.222019	0	3.07561	0.325139	0.179991		1.16684e-06	0.00045683	0.180219	0.00780172		-0.134808	0.303653	3.06657	0.326098	0.194836		6.4655e-06	0.000466692	0.195069	0.0423162		0.111096	0.248396	3.10458	0.322105	0.201065		6.25795e-06	0.000501742	0.201316	0.0380966
						0.221562	0	3.15074	0.317386	0.180448		2.96328e-05	0.00045683	0.180676	0.198132		-0.221562	0	3.0756	0.32514	0.180448		1.16684e-06	0.00045683	0.180676	0.00780172		-0.135265	0.303748	3.06651	0.326104	0.195302		6.45211e-06	0.000467	0.195536	0.0422008		0.110639	0.248188	3.10452	0.322111	0.201567		6.2194e-06	0.000501552	0.201818	0.0378763
						0.221106	0	3.15044	0.317416	0.180905		2.80345e-05	0.00045683	0.181133	0.187445		-0.221106	0	3.07559	0.325141	0.180905		9.09446e-07	0.00045683	0.181133	0.00608076		-0.135722	0.303845	3.06645	0.32611	0.195769		6.28881e-06	0.000467312	0.196003	0.0411052		0.110182	0.247981	3.10446	0.322117	0.202069		6.20803e-06	0.000501315	0.202319	0.037825
						0.220649	0	3.15016	0.317444	0.181361		2.80345e-05	0.00045683	0.18159	0.187445		-0.220649	0	3.07558	0.325142	0.181361		9.09446e-07	0.00045683	0.18159	0.00608076		-0.136179	0.303944	3.06639	0.326117	0.196237		6.29273e-06	0.000467602	0.196471	0.0411054		0.109725	0.247775	3.1044	0.322123	0.20257		6.20496e-06	0.000501072	0.202821	0.0378245
						0.220192	0	3.14988	0.317472	0.181818		2.80345e-05	0.00045683	0.182047	0.187445		-0.220192	0	3.07557	0.325143	0.181818		9.09446e-07	0.00045683	0.182047	0.00608076		-0.136636	0.304043	3.06633	0.326123	0.196704		6.29669e-06	0.000467898	0.196938	0.0411052		0.109268	0.247569	3.10434	0.322129	0.203071		6.48833e-06	0.000500834	0.203322	0.0395708
						0.219735	0	3.14961	0.3175	0.182275		2.80345e-05	0.00045683	0.182503	0.187445		-0.219735	0	3.07556	0.325144	0.182275		9.09446e-07	0.00045683	0.182503	0.00608076		-0.137092	0.304145	3.06627	0.326129	0.197172		6.30068e-06	0.000468201	0.197406	0.0411046		0.108811	0.247364	3.10428	0.322136	0.203572		6.51022e-06	0.0005006	0.203822	0.0397228
						0.219278	0	3.14933	0.317528	0.182732		2.80345e-05	0.00045683	0.18296	0.187445		-0.219278	0	3.07556	0.325145	0.182732		9.09446e-07	0.00045683	0.18296	0.00608076		-0.137549	0.304247	3.06621	0.326136	0.19764		6.30472e-06	0.000468512	0.197875	0.0411037		0.108355	0.247159	3.10422	0.322142	0.204073		6.50702e-06	0.00050037	0.204323	0.0397215
						0.218821	0	3.14905	0.317556	0.183189		2.80345e-05	0.00045683	0.183417	0.187445		-0.218821	0	3.07555	0.325145	0.183189		9.09446e-07	0.00045683	0.183417	0.00608076		-0.138006	0.304351	3.06615	0.326142	0.198109		6.30881e-06	0.000468829	0.198343	0.0411024		0.107898	0.246955	3.10415	0.322149	0.204573		6.50387e-06	0.000500145	0.204823	0.0397202
						0.218365	0	3.14877	0.317584	0.183646		2.80345e-05	0.00045683	0.183874	0.187445		-0.218365	0	3.07554	0.325146	0.183646		9.09446e-07	0.00045683	0.183874	0.00608076		-0.138463	0.304457	3.06609	0.326148	0.198578		6.25207e-06	0.000469155	0.198812	0.0407045		0.107441	0.246751	3.10409	0.322156	0.205073		6.50078e-06	0.000499923	0.205323	0.0397189
						0.217908	0	3.14849	0.317612	0.184102		2.80345e-05	0.00045683	0.184331	0.187445		-0.217908	0	3.07553	0.325147	0.184102		9.09446e-07	0.00045683	0.184331	0.00608076		-0.13892	0.304563	3.06603	0.326154	0.199047		6.20278e-06	0.000469488	0.199282	0.040355		0.106984	0.246548	3.10403	0.322162	0.205573		6.49773e-06	0.000499705	0.205823	0.0397176
						0.217451	0	3.14822	0.31764	0.184559		2.80345e-05	0.00045683	0.184788	0.187445		-0.217451	0	3.07552	0.325148	0.184559		9.09446e-07	0.00045683	0.184788	0.00608076		-0.139377	0.304672	3.06597	0.326161	0.199516		6.20748e-06	0.000469829	0.199751	0.0403563		0.106527	0.246346	3.10397	0.322169	0.206073		6.38748e-06	0.000499492	0.206322	0.0390604
						0.216994	0	3.14794	0.317668	0.185016		2.80345e-05	0.00045683	0.185244	0.187445		-0.216994	0	3.07551	0.325149	0.185016		9.09446e-07	0.00045683	0.185244	0.00608076		-0.139833	0.304781	3.06592	0.326167	0.199986		6.21223e-06	0.000470178	0.200221	0.0403571		0.10607	0.246144	3.1039	0.322175	0.206572		6.33636e-06	0.000499299	0.206822	0.0387627
						0.216537	0	3.14766	0.317696	0.185473		2.80345e-05	0.00045683	0.185701	0.187445		-0.216537	0	3.0755	0.32515	0.185473		9.09446e-07	0.00045683	0.185701	0.00608076		-0.14029	0.304893	3.06586	0.326173	0.200456		6.1985e-06	0.000470536	0.200692	0.0402373		0.105614	0.245942	3.10384	0.322181	0.207071		6.51295e-06	0.000499132	0.207321	0.0398564
						0.21608	0	3.14738	0.317724	0.18593		2.65632e-05	0.00045683	0.186158	0.177607		-0.21608	0	3.0755	0.325151	0.18593		6.66239e-07	0.00045683	0.186158	0.00445463		-0.140747	0.305005	3.0658	0.326179	0.200927		6.02752e-06	0.000470898	0.201162	0.0390973		0.105157	0.245741	3.10378	0.322188	0.207571		6.50402e-06	0.000498923	0.20782	0.0398184
						0.215624	0	3.14712	0.317751	0.186386		2.65632e-05	0.00045683	0.186615	0.177607		-0.215624	0	3.07549	0.325152	0.186386		6.66239e-07	0.00045683	0.186615	0.00445463		-0.141204	0.30512	3.06574	0.326185	0.201398		6.0319e-06	0.000471233	0.201633	0.039098		0.1047	0.245541	3.10372	0.322194	0.20807		6.50138e-06	0.000498707	0.208319	0.0398195
						0.215167	0	3.14686	0.317777	0.186843		2.65632e-05	0.00045683	0.187072	0.177607		-0.215167	0	3.07548	0.325152	0.186843		6.66239e-07	0.00045683	0.187072	0.00445463		-0.141661	0.305235	3.06569	0.326191	0.201869		6.03633e-06	0.000471574	0.202105	0.0390983		0.104243	0.245341	3.10366	0.322201	0.208568		6.49879e-06	0.000498495	0.208817	0.0398205
						0.21471	0	3.14659	0.317804	0.1873		2.65632e-05	0.00045683	0.187529	0.177607		-0.21471	0	3.07548	0.325153	0.1873		6.66239e-07	0.00045683	0.187529	0.00445463		-0.142118	0.305352	3.06563	0.326197	0.202341		6.0408e-06	0.000471924	0.202577	0.0390983		0.103786	0.245141	3.10359	0.322207	0.209067		6.49623e-06	0.000498287	0.209316	0.0398215
						0.214253	0	3.14633	0.317831	0.187757		2.65632e-05	0.00045683	0.187985	0.177607		-0.214253	0	3.07547	0.325154	0.187757		6.66239e-07	0.00045683	0.187985	0.00445463		-0.142574	0.305471	3.06557	0.326203	0.202813		6.04533e-06	0.000472281	0.203049	0.039098		0.103329	0.244942	3.10353	0.322214	0.209565		6.49372e-06	0.000498083	0.209814	0.0398224
						0.213796	0	3.14607	0.317857	0.188214		2.65632e-05	0.00045683	0.188442	0.177607		-0.213796	0	3.07546	0.325154	0.188214		6.66239e-07	0.00045683	0.188442	0.00445463		-0.143031	0.30559	3.06551	0.326209	0.203285		6.0499e-06	0.000472646	0.203521	0.0390974		0.102873	0.244744	3.10347	0.32222	0.210063		6.49124e-06	0.000497882	0.210312	0.0398233
						0.213339	0	3.14581	0.317884	0.188671		2.65632e-05	0.00045683	0.188899	0.177607		-0.213339	0	3.07546	0.325155	0.188671		6.66239e-07	0.00045683	0.188899	0.00445463		-0.143488	0.305712	3.06546	0.326216	0.203758		6.05453e-06	0.000473019	0.203994	0.0390964		0.102416	0.244546	3.1034	0.322227	0.210561		6.6659e-06	0.000497685	0.21081	0.040911
						0.212883	0	3.14554	0.31791	0.189127		2.65632e-05	0.00045683	0.189356	0.177607		-0.212883	0	3.07545	0.325156	0.189127		6.66239e-07	0.00045683	0.189356	0.00445463		-0.143945	0.305834	3.0654	0.326222	0.204231		6.05921e-06	0.000473401	0.204467	0.0390951		0.101959	0.244348	3.10334	0.322233	0.211059		6.75786e-06	0.000497491	0.211307	0.0414915
						0.212426	0	3.14528	0.317937	0.189584		2.65632e-05	0.00045683	0.189813	0.177607		-0.212426	0	3.07544	0.325156	0.189584		6.66239e-07	0.00045683	0.189813	0.00445463		-0.144402	0.305959	3.06534	0.326228	0.204704		6.06394e-06	0.000473791	0.204941	0.0390934		0.101502	0.244151	3.10328	0.32224	0.211556		6.75529e-06	0.0004973	0.211805	0.0414917
						0.211969	0	3.14502	0.317963	0.190041		2.65632e-05	0.00045683	0.19027	0.177607		-0.211969	0	3.07544	0.325157	0.190041		6.66239e-07	0.00045683	0.19027	0.00445463		-0.144859	0.306084	3.06529	0.326234	0.205178		6.06873e-06	0.000474191	0.205415	0.0390913		0.101045	0.243955	3.10321	0.322247	0.212053		6.75277e-06	0.000497113	0.212302	0.0414918
						0.211512	0	3.14475	0.31799	0.190498		2.65632e-05	0.00045683	0.190726	0.177607		-0.211512	0	3.07543	0.325158	0.190498		6.66239e-07	0.00045683	0.190726	0.00445463		-0.145315	0.306211	3.06523	0.32624	0.205652		5.98702e-06	0.000474599	0.205889	0.0385318		0.100588	0.243759	3.10315	0.322254	0.212551		6.73807e-06	0.000496929	0.212799	0.0414168
						0.211055	0	3.14449	0.318016	0.190955		2.52063e-05	0.00045683	0.191183	0.168535		-0.211055	0	3.07543	0.325158	0.190955		4.35611e-07	0.00045683	0.191183	0.00291259		-0.145772	0.30634	3.06517	0.326246	0.206127		5.78422e-06	0.000475013	0.206364	0.0371942		0.100132	0.243563	3.10308	0.32226	0.213047		6.73222e-06	0.000496706	0.213296	0.0413995
						0.210598	0	3.14424	0.318042	0.191412		2.52063e-05	0.00045683	0.19164	0.168535		-0.210598	0	3.07542	0.325159	0.191412		4.35611e-07	0.00045683	0.19164	0.00291259		-0.146229	0.30647	3.06512	0.326252	0.206602		5.79792e-06	0.000475392	0.206839	0.0372525		0.0996748	0.243368	3.10302	0.322267	0.213544		6.72912e-06	0.000496477	0.213792	0.0413994
						0.210142	0	3.14399	0.318067	0.191868		2.52063e-05	0.00045683	0.192097	0.168535		-0.210142	0	3.07542	0.325159	0.191868		4.35611e-07	0.00045683	0.192097	0.00291259		-0.146686	0.306602	3.06507	0.326257	0.207077		5.81098e-06	0.000475778	0.207315	0.0373061		0.099218	0.243174	3.10295	0.322274	0.214041		6.72606e-06	0.000496252	0.214289	0.0413994
						0.209685	0	3.14374	0.318092	0.192325		2.52063e-05	0.00045683	0.192554	0.168535		-0.209685	0	3.07541	0.32516	0.192325		4.35611e-07	0.00045683	0.192554	0.00291259		-0.147143	0.306735	3.06501	0.326263	0.207553		5.81604e-06	0.000476171	0.207791	0.0373078		0.0987611	0.24298	3.10289	0.322281	0.214537		6.95588e-06	0.000496032	0.214785	0.042833
						0.209228	0	3.14349	0.318117	0.192782		2.52063e-05	0.00045683	0.193011	0.168535		-0.209228	0	3.07541	0.32516	0.192782		4.35611e-07	0.00045683	0.193011	0.00291259		-0.1476	0.306869	3.06496	0.326269	0.208029		5.82115e-06	0.000476573	0.208267	0.0373091		0.0983043	0.242787	3.10282	0.322288	0.215033		6.96494e-06	0.000495814	0.215281	0.0429075
						0.208771	0	3.14325	0.318142	0.193239		2.52063e-05	0.00045683	0.193467	0.168535		-0.208771	0	3.07541	0.32516	0.193239		4.35611e-07	0.00045683	0.193467	0.00291259		-0.148056	0.307005	3.0649	0.326275	0.208505		5.82632e-06	0.000476983	0.208744	0.0373102		0.0978475	0.242594	3.10275	0.322295	0.215529		6.9618e-06	0.000495601	0.215777	0.0429067
						0.208314	0	3.143	0.318168	0.193696		2.52063e-05	0.00045683	0.193924	0.168535		-0.208314	0	3.0754	0.325161	0.193696		4.35611e-07	0.00045683	0.193924	0.00291259		-0.148513	0.307142	3.06485	0.326281	0.208982		5.83156e-06	0.000477402	0.209221	0.0373109		0.0973906	0.242402	3.10269	0.322301	0.216024		6.95871e-06	0.000495391	0.216272	0.0429058
						0.207857	0	3.14275	0.318193	0.194153		2.52063e-05	0.00045683	0.194381	0.168535		-0.207857	0	3.0754	0.325161	0.194153		4.35611e-07	0.00045683	0.194381	0.00291259		-0.14897	0.307281	3.06479	0.326286	0.20946		5.83686e-06	0.00047783	0.209699	0.0373114		0.0969338	0.24221	3.10262	0.322308	0.21652		6.95567e-06	0.000495185	0.216767	0.0429049
						0.207401	0	3.1425	0.318218	0.194609		2.52063e-05	0.00045683	0.194838	0.168535		-0.207401	0	3.07539	0.325162	0.194609		4.35611e-07	0.00045683	0.194838	0.00291259		-0.149427	0.307421	3.06474	0.326292	0.209938		5.84222e-06	0.000478268	0.210177	0.0373115		0.096477	0.242019	3.10255	0.322315	0.217015		6.95267e-06	0.000494982	0.217262	0.042904
						0.206944	0	3.14225	0.318243	0.195066		2.52063e-05	0.00045683	0.195295	0.168535		-0.206944	0	3.07539	0.325162	0.195066		4.35611e-07	0.00045683	0.195295	0.00291259		-0.149884	0.307562	3.06468	0.326298	0.210416		5.84765e-06	0.000478715	0.210655	0.0373112		0.0960202	0.241828	3.10248	0.322322	0.21751		6.94971e-06	0.000494782	0.217757	0.042903
						0.206487	0	3.142	0.318269	0.195523		2.52063e-05	0.00045683	0.195751	0.168535		-0.206487	0	3.07538	0.325163	0.195523		4.35611e-07	0.00045683	0.195751	0.00291259		-0.150341	0.307705	3.06463	0.326304	0.210895		5.83243e-06	0.000479172	0.211134	0.0371786		0.0955633	0.241638	3.10242	0.322329	0.218005		6.9929e-06	0.000494586	0.218252	0.0431868
						0.20603	0	3.14175	0.318294	0.19598		2.39527e-05	0.00045683	0.196208	0.160153		-0.20603	0	3.07538	0.325163	0.19598		2.16151e-07	0.00045683	0.196208	0.00144524		-0.150797	0.30785	3.06457	0.32631	0.211374		5.64144e-06	0.000479635	0.211614	0.0359265		0.0951065	0.241449	3.10235	0.322336	0.218499		7.16512e-06	0.000494354	0.218746	0.0442711
						0.205573	0	3.14152	0.318318	0.196437		2.39527e-05	0.00045683	0.196665	0.160153		-0.205573	0	3.07538	0.325163	0.196437		2.16151e-07	0.00045683	0.196665	0.00144524		-0.151254	0.307996	3.06452	0.326315	0.211853		5.64643e-06	0.000480058	0.212093	0.0359266		0.0946497	0.24126	3.10228	0.322343	0.218994		7.01505e-06	0.000494117	0.219241	0.0433647
						0.205116	0	3.14128	0.318342	0.196894		2.39527e-05	0.00045683	0.197122	0.160153		-0.205116	0	3.07538	0.325163	0.196894		2.16151e-07	0.00045683	0.197122	0.00144524		-0.151711	0.308144	3.06447	0.326321	0.212333		5.65148e-06	0.000480489	0.212574	0.0359264		0.0941928	0.241072	3.10221	0.32235	0.219488		6.95363e-06	0.000493907	0.219735	0.0430033
						0.20466	0	3.14104	0.318366	0.19735		2.39527e-05	0.00045683	0.197579	0.160153		-0.20466	0	3.07537	0.325164	0.19735		2.16151e-07	0.00045683	0.197579	0.00144524		-0.152168	0.308292	3.06441	0.326327	0.212814		5.65659e-06	0.00048093	0.213054	0.035926		0.093736	0.240884	3.10215	0.322357	0.219982		6.95104e-06	0.000493708	0.220229	0.0430046
						0.204203	0	3.14081	0.31839	0.197807		2.39527e-05	0.00045683	0.198036	0.160153		-0.204203	0	3.07537	0.325164	0.197807		2.16151e-07	0.00045683	0.198036	0.00144524		-0.152625	0.308443	3.06436	0.326332	0.213295		5.60319e-06	0.00048138	0.213536	0.0355535		0.0932792	0.240697	3.10208	0.322364	0.220475		6.94849e-06	0.000493513	0.220722	0.0430058
						0.203746	0	3.14057	0.318413	0.198264		2.39527e-05	0.00045683	0.198492	0.160153		-0.203746	0	3.07537	0.325164	0.198264		2.16151e-07	0.00045683	0.198492	0.00144524		-0.153081	0.308595	3.06431	0.326338	0.213776		5.60009e-06	0.000481839	0.214017	0.0355		0.0928223	0.24051	3.10201	0.322371	0.220969		6.94598e-06	0.000493321	0.221216	0.043007
						0.203289	0	3.14033	0.318437	0.198721		2.39527e-05	0.00045683	0.198949	0.160153		-0.203289	0	3.07537	0.325164	0.198721		2.16151e-07	0.00045683	0.198949	0.00144524		-0.153538	0.308748	3.06425	0.326344	0.214258		5.60572e-06	0.000482308	0.214499	0.0355011		0.0923655	0.240324	3.10195	0.322378	0.221462		6.9435e-06	0.000493132	0.221709	0.0430081
						0.202832	0	3.1401	0.318461	0.199178		2.39527e-05	0.00045683	0.199406	0.160153		-0.202832	0	3.07537	0.325165	0.199178		2.16151e-07	0.00045683	0.199406	0.00144524		-0.153995	0.308903	3.0642	0.326349	0.21474		5.61142e-06	0.000482788	0.214982	0.0355019		0.0919087	0.240138	3.10188	0.322385	0.221955		7.02344e-06	0.000492947	0.222202	0.0435197
						0.202376	0	3.13986	0.318485	0.199635		2.39527e-05	0.00045683	0.199863	0.160153		-0.202376	0	3.07536	0.325165	0.199635		2.16151e-07	0.00045683	0.199863	0.00144524		-0.154452	0.309059	3.06415	0.326355	0.215223		5.61719e-06	0.000483277	0.215465	0.0355025		0.0914519	0.239953	3.10181	0.322392	0.222448		7.14705e-06	0.000492764	0.222695	0.044302
						0.201919	0	3.13963	0.318509	0.200091		2.39527e-05	0.00045683	0.20032	0.160153		-0.201919	0	3.07536	0.325165	0.200091		2.16151e-07	0.00045683	0.20032	0.00144524		-0.154909	0.309216	3.0641	0.32636	0.215707		5.62304e-06	0.000483777	0.215948	0.0355027		0.090995	0.239768	3.10174	0.322399	0.222941		7.14451e-06	0.000492584	0.223187	0.0443025
						0.201462	0	3.13939	0.318533	0.200548		2.39527e-05	0.00045683	0.200777	0.160153		-0.201462	0	3.07536	0.325165	0.200548		2.16151e-07	0.00045683	0.200777	0.00144524		-0.155366	0.309376	3.06404	0.326366	0.21619		5.608e-06	0.000484288	0.216432	0.0353703		0.0905382	0.239584	3.10167	0.322407	0.223434		7.14973e-06	0.000492406	0.22368	0.0443508
						0.201005	0	3.13915	0.318557	0.201005		2.27928e-05	0.00045683	0.201233	0.152398		-0.201005	0	3.07536	0.325165	0.201005		6.61674e-09	0.00045683	0.201233	4.4241e-05		-0.155822	0.309536	3.06399	0.326372	0.216675		5.41513e-06	0.000484804	0.216917	0.0341175		0.0900814	0.2394	3.10161	0.322414	0.223926		7.14855e-06	0.000492197	0.224172	0.0443624
						0.200548	0	3.13893	0.31858	0.201462		2.27928e-05	0.00045683	0.20169	0.152398		-0.200548	0	3.07536	0.325165	0.201462		6.61674e-09	0.00045683	0.20169	4.4241e-05		-0.156279	0.309699	3.06394	0.326377	0.217159		5.42049e-06	0.000485275	0.217402	0.0341182		0.0896245	0.239217	3.10154	0.322421	0.224418		7.14551e-06	0.000491982	0.224664	0.0443628
						0.200091	0	3.1387	0.318603	0.201919		2.27928e-05	0.00045683	0.202147	0.152398		-0.200091	0	3.07536	0.325165	0.201919		6.61674e-09	0.00045683	0.202147	4.4241e-05		-0.156736	0.309862	3.06389	0.326383	0.217645		5.42592e-06	0.000485755	0.217888	0.0341187		0.0891677	0.239034	3.10147	0.322428	0.22491		7.1425e-06	0.000491771	0.225156	0.0443632
						0.199635	0	3.13848	0.318626	0.202376		2.27928e-05	0.00045683	0.202604	0.152398		-0.199635	0	3.07536	0.325165	0.202376		6.61674e-09	0.00045683	0.202604	4.4241e-05		-0.157193	0.310027	3.06384	0.326388	0.21813		5.43142e-06	0.000486245	0.218374	0.0341188		0.0887109	0.238852	3.1014	0.322435	0.225402		7.13954e-06	0.000491563	0.225648	0.0443636
						0.199178	0	3.13826	0.318648	0.202832		2.27928e-05	0.00045683	0.203061	0.152398		-0.199178	0	3.07536	0.325165	0.202832		6.61674e-09	0.00045683	0.203061	4.4241e-05		-0.15765	0.310194	3.06379	0.326393	0.218617		5.43699e-06	0.000486744	0.21886	0.0341187		0.088254	0.238671	3.10133	0.322442	0.225894		7.2358e-06	0.000491358	0.226139	0.0449805
						0.198721	0	3.13803	0.318671	0.203289		2.27928e-05	0.00045683	0.203518	0.152398		-0.198721	0	3.07536	0.325165	0.203289		6.61674e-09	0.00045683	0.203518	4.4241e-05		-0.158107	0.310362	3.06374	0.326399	0.219103		5.44264e-06	0.000487255	0.219347	0.0341184		0.0877972	0.23849	3.10126	0.322449	0.226385		7.3163e-06	0.000491157	0.22663	0.0454995
						0.198264	0	3.13781	0.318694	0.203746		2.27928e-05	0.00045683	0.203974	0.152398		-0.198264	0	3.07536	0.325165	0.203746		3.30837e-08	0.00228415	0.204888	4.4241e-05		-0.158563	0.310531	3.06369	0.326404	0.219591		5.44835e-06	0.000487775	0.219835	0.0341177		0.0873404	0.238309	3.10119	0.322457	0.226876		7.3133e-06	0.000490959	0.227122	0.0454992
						0.197807	0	3.13758	0.318717	0.204203		2.27928e-05	0.00045683	0.204431	0.152398		-0.19598	0	3.07536	0.325165	0.20603							-0.15902	0.310702	3.06363	0.32641	0.220078		5.45414e-06	0.000488307	0.220323	0.0341168		0.0868836	0.23813	3.10112	0.322464	0.227367		7.31033e-06	0.000490764	0.227612	0.0454988
						0.19735	0	3.13736	0.31874	0.20466		2.27928e-05	0.00045683	0.204888	0.152398													-0.159477	0.310875	3.06358	0.326415	0.220567		5.46001e-06	0.00048885	0.220811	0.0341156		0.0864267	0.23795	3.10105	0.322471	0.227858		7.30741e-06	0.000490571	0.228103	0.0454984
						0.196894	0	3.13713	0.318762	0.205116		2.27928e-05	0.00045683	0.205345	0.152398													-0.159934	0.311049	3.06353	0.326421	0.221056		5.46595e-06	0.000489405	0.2213	0.034114		0.0859699	0.237771	3.10098	0.322479	0.228348		7.30452e-06	0.000490382	0.228594	0.045498
						0.196437	0	3.13691	0.318785	0.205573		2.27928e-05	0.00045683	0.205802	0.152398													-0.160391	0.311225	3.06348	0.326426	0.221545		5.41408e-06	0.000489971	0.22179	0.0337512		0.0855131	0.237593	3.10091	0.322486	0.228839		7.32298e-06	0.000490196	0.229084	0.0456303
						0.19598	0	3.13668	0.318808	0.20603		2.17177e-05	0.00045683	0.206259	0.14521													-0.160848	0.311402	3.06343	0.326431	0.222035		5.20748e-06	0.000490543	0.22228	0.0324254		0.0850562	0.237415	3.10084	0.322493	0.229329		7.3246e-06	0.00048998	0.229574	0.0456605
						0.195523	0	3.13647	0.31883	0.206487		2.17177e-05	0.00045683	0.206715	0.14521													-0.161304	0.31158	3.06338	0.326437	0.222525		5.22233e-06	0.000491062	0.222771	0.0324835		0.0845994	0.237238	3.10077	0.322501	0.229819		7.42129e-06	0.000489759	0.230064	0.0462841
						0.195066	0	3.13626	0.318851	0.206944		2.17177e-05	0.00045683	0.207172	0.14521													-0.161761	0.311761	3.06333	0.326442	0.223017		5.22815e-06	0.000491588	0.223262	0.032485		0.0841426	0.237062	3.1007	0.322508	0.230309		7.4747e-06	0.000489543	0.230553	0.0466378
						0.194609	0	3.13604	0.318873	0.207401		2.17177e-05	0.00045683	0.207629	0.14521													-0.162218	0.311942	3.06328	0.326447	0.223508		5.23405e-06	0.000492125	0.223754	0.0324861		0.0836858	0.236886	3.10063	0.322516	0.230798		7.47124e-06	0.000489329	0.231043	0.0466366
						0.194153	0	3.13583	0.318895	0.207857		2.17177e-05	0.00045683	0.208086	0.14521													-0.162675	0.312125	3.06323	0.326452	0.224		5.24003e-06	0.000492672	0.224247	0.0324871		0.0832289	0.23671	3.10055	0.322523	0.231288		7.46783e-06	0.000489119	0.231532	0.0466354
						0.193696	0	3.13562	0.318917	0.208314		2.17177e-05	0.00045683	0.208543	0.14521													-0.163132	0.31231	3.06318	0.326458	0.224493		5.2461e-06	0.000493232	0.22474	0.0324878		0.0827721	0.236536	3.10048	0.322531	0.231777		7.46446e-06	0.000488912	0.232021	0.0466341
						0.193239	0	3.1354	0.318938	0.208771		2.17177e-05	0.00045683	0.209	0.14521													-0.163589	0.312496	3.06314	0.326463	0.224986		5.25224e-06	0.000493802	0.225233	0.0324883		0.0823153	0.236361	3.10041	0.322538	0.232266		7.46113e-06	0.000488708	0.23251	0.0466327
						0.192782	0	3.13519	0.31896	0.209228		2.17177e-05	0.00045683	0.209456	0.14521													-0.164045	0.312683	3.06309	0.326468	0.22548		5.25847e-06	0.000494385	0.225727	0.0324885		0.0818584	0.236188	3.10034	0.322545	0.232754		7.29727e-06	0.000488507	0.232999	0.0456273
						0.192325	0	3.13498	0.318982	0.209685		2.17177e-05	0.00045683	0.209913	0.14521													-0.164502	0.312872	3.06304	0.326473	0.225974		5.26479e-06	0.00049498	0.226222	0.0324884		0.0814016	0.236015	3.10027	0.322553	0.233243		7.28824e-06	0.000488332	0.233487	0.0455872
						0.191868	0	3.13476	0.319003	0.210142		2.17177e-05	0.00045683	0.21037	0.14521													-0.164959	0.313063	3.06299	0.326479	0.226469		5.27119e-06	0.000495587	0.226717	0.0324881		0.0809448	0.235842	3.1002	0.32256	0.233731		7.38735e-06	0.00048816	0.233975	0.0462234
						0.191412	0	3.13455	0.319025	0.210598		2.17177e-05	0.00045683	0.210827	0.14521													-0.165416	0.313255	3.06294	0.326484	0.226965		5.25566e-06	0.000496208	0.227213	0.0323518		0.0804879	0.23567	3.10013	0.322567	0.234219		7.45694e-06	0.00048799	0.234463	0.0466751
						0.190955	0	3.13434	0.319047	0.211055		2.07198e-05	0.00045683	0.211284	0.138537													-0.165873	0.313448	3.06289	0.326489	0.227461		5.05328e-06	0.000496834	0.22771	0.0310668		0.0800311	0.235499	3.10006	0.322575	0.234707		7.4595e-06	0.000487794	0.234951	0.0467099
						0.190498	0	3.13413	0.319068	0.211512		2.07198e-05	0.00045683	0.211741	0.138537													-0.16633	0.313644	3.06284	0.326494	0.227958		5.05913e-06	0.000497401	0.228207	0.0310674		0.0795743	0.235327	3.09998	0.322582	0.235195		7.45658e-06	0.000487593	0.235439	0.0467109
						0.190041	0	3.13393	0.319088	0.211969		2.07198e-05	0.00045683	0.212197	0.138537													-0.166786	0.313841	3.06279	0.326499	0.228455		5.06507e-06	0.000497979	0.228704	0.0310677		0.0791175	0.235157	3.09991	0.32259	0.235683		7.4537e-06	0.000487395	0.235926	0.0467118
						0.189584	0	3.13373	0.319109	0.212426		2.07198e-05	0.00045683	0.212654	0.138537													-0.167243	0.314039	3.06275	0.326504	0.228953		5.07109e-06	0.000498569	0.229203	0.0310679		0.0786606	0.234987	3.09984	0.322597	0.23617		7.45086e-06	0.0004872	0.236414	0.0467126
						0.189127	0	3.13352	0.31913	0.212883		2.07198e-05	0.00045683	0.213111	0.138537													-0.1677	0.314238	3.0627	0.326509	0.229452		5.0772e-06	0.000499171	0.229702	0.0310677		0.0782038	0.234818	3.09977	0.322605	0.236657		7.44805e-06	0.000487008	0.236901	0.0467134
						0.188671	0	3.13332	0.31915	0.213339		2.07198e-05	0.00045683	0.213568	0.138537													-0.168157	0.31444	3.06265	0.326514	0.229951		5.08339e-06	0.000499786	0.230201	0.0310674		0.077747	0.234649	3.0997	0.322612	0.237144		7.44527e-06	0.000486819	0.237388	0.0467142
						0.188214	0	3.13312	0.319171	0.213796		2.07198e-05	0.00045683	0.214025	0.138537													-0.168614	0.314642	3.0626	0.32652	0.230451		5.08966e-06	0.000500412	0.230701	0.0310668		0.0772901	0.234481	3.09963	0.32262	0.237631		7.52534e-06	0.000486632	0.237874	0.0472346
						0.187757	0	3.13291	0.319192	0.214253		2.07198e-05	0.00045683	0.214481	0.138537													-0.169071	0.314847	3.06256	0.326525	0.230951		5.07005e-06	0.000501052	0.231202	0.0309075		0.0768333	0.234313	3.09955	0.322627	0.238118		7.56544e-06	0.000486449	0.238361	0.0475042
						0.1873	0	3.13271	0.319213	0.21471		2.07198e-05	0.00045683	0.214938	0.138537													-0.169527	0.315052	3.06251	0.32653	0.231452		5.07066e-06	0.000501705	0.231703	0.030871		0.0763765	0.234146	3.09948	0.322635	0.238604		7.56265e-06	0.000486268	0.238847	0.0475044
						0.186843	0	3.13251	0.319233	0.215167		2.07198e-05	0.00045683	0.215395	0.138537													-0.169984	0.31526	3.06246	0.326535	0.231954		5.07741e-06	0.000502372	0.232205	0.0308711		0.0759196	0.233979	3.09941	0.322642	0.23909		7.5599e-06	0.000486089	0.239333	0.0475046
						0.186386	0	3.1323	0.319254	0.215624		2.07198e-05	0.00045683	0.215852	0.138537													-0.170441	0.315469	3.06241	0.32654	0.232456		5.0625e-06	0.000503053	0.232708	0.0307388		0.0754628	0.233813	3.09934	0.32265	0.239577		7.5924e-06	0.000485913	0.239819	0.0477261
						0.18593	0	3.1321	0.319275	0.21608		1.9792e-05	0.00045683	0.216309	0.132334													-0.170898	0.315679	3.06237	0.326545	0.232959		4.86295e-06	0.00050374	0.233211	0.0294869		0.075006	0.233648	3.09926	0.322657	0.240062		7.59745e-06	0.000485712	0.240305	0.0477776
						0.185473	0	3.1319	0.319295	0.216537		1.9792e-05	0.00045683	0.216766	0.132334													-0.171355	0.315892	3.06232	0.32655	0.233463		4.86912e-06	0.000504361	0.233715	0.029488		0.0745492	0.233483	3.09919	0.322665	0.240548		7.59426e-06	0.000485508	0.240791	0.0477776
						0.185016	0	3.13171	0.319314	0.216994		1.9792e-05	0.00045683	0.217222	0.132334													-0.171812	0.316105	3.06227	0.326555	0.233968		4.87537e-06	0.000504993	0.23422	0.0294888		0.0740923	0.233318	3.09912	0.322673	0.241034		7.59112e-06	0.000485307	0.241276	0.0477777
						0.184559	0	3.13152	0.319334	0.217451		1.9792e-05	0.00045683	0.217679	0.132334													-0.172268	0.316321	3.06223	0.32656	0.234473		4.88172e-06	0.000505638	0.234725	0.0294895		0.0736355	0.233155	3.09904	0.32268	0.241519		7.64744e-06	0.000485108	0.241762	0.0481518
						0.184102	0	3.13132	0.319354	0.217908		1.9792e-05	0.00045683	0.218136	0.132334													-0.172725	0.316537	3.06218	0.326564	0.234978		4.89012e-06	0.000506296	0.235231	0.0295019		0.0731787	0.232991	3.09897	0.322688	0.242004		7.68643e-06	0.000484912	0.242247	0.0484169
						0.183646	0	3.13113	0.319374	0.218365		1.9792e-05	0.00045683	0.218593	0.132334													-0.173182	0.316756	3.06214	0.326569	0.235485		4.89716e-06	0.000506965	0.235738	0.0295054		0.0727218	0.232829	3.0989	0.322696	0.242489		7.6833e-06	0.00048472	0.242731	0.0484164
						0.183189	0	3.13093	0.319393	0.218821		1.9792e-05	0.00045683	0.21905	0.132334													-0.173639	0.316976	3.06209	0.326574	0.235991		4.90376e-06	0.000507647	0.236245	0.0295055		0.072265	0.232667	3.09882	0.322703	0.242974		7.6802e-06	0.00048453	0.243216	0.0484158
						0.182732	0	3.13074	0.319413	0.219278		1.9792e-05	0.00045683	0.219507	0.132334													-0.174096	0.317197	3.06205	0.326579	0.236499		4.91046e-06	0.000508343	0.236753	0.0295054		0.0718082	0.232505	3.09875	0.322711	0.243458		7.67713e-06	0.000484342	0.2437	0.0484152
						0.182275	0	3.13055	0.319433	0.219735		1.9792e-05	0.00045683	0.219963	0.132334													-0.174552	0.31742	3.062	0.326584	0.237007		4.91727e-06	0.000509053	0.237262	0.029505		0.0713514	0.232344	3.09868	0.322719	0.243943		7.6741e-06	0.000484157	0.244185	0.0484146
						0.181818	0	3.13035	0.319453	0.220192		1.9792e-05	0.00045683	0.22042	0.132334													-0.175009	0.317644	3.06195	0.326589	0.237517		4.92418e-06	0.000509779	0.237771	0.0295044		0.0708945	0.232184	3.0986	0.322726	0.244427		7.6711e-06	0.000483975	0.244669	0.0484139
						0.181361	0	3.13016	0.319473	0.220649		1.9792e-05	0.00045683	0.220877	0.132334													-0.175466	0.317871	3.06191	0.326594	0.238026		4.9088e-06	0.00051052	0.238282	0.0293696		0.0704377	0.232024	3.09853	0.322734	0.244911		7.71462e-06	0.000483796	0.245153	0.0487066
						0.180905	0	3.12996	0.319492	0.221106		1.89282e-05	0.00045683	0.221334	0.126558													-0.175923	0.318099	3.06186	0.326599	0.238537		4.70346e-06	0.000511268	0.238792	0.0280998		0.0699809	0.231865	3.09845	0.322742	0.245395		7.75714e-06	0.000483593	0.245636	0.0489955
						0.180448	0	3.12978	0.319511	0.221562		1.89282e-05	0.00045683	0.221791	0.126558													-0.17638	0.318328	3.06182	0.326603	0.239048		4.70975e-06	0.000511941	0.239304	0.0281005		0.069524	0.231706	3.09838	0.322749	0.245878		7.79643e-06	0.000483388	0.24612	0.0492646
						0.179991	0	3.12959	0.31953	0.222019		1.89282e-05	0.00045683	0.222248	0.126558													-0.176837	0.318559	3.06177	0.326608	0.23956		4.71614e-06	0.000512627	0.239816	0.0281009		0.0690672	0.231548	3.0983	0.322757	0.246361		7.79298e-06	0.000483186	0.246603	0.0492634
						0.179534	0	3.12941	0.319549	0.222476		1.89282e-05	0.00045683	0.222704	0.126558													-0.177293	0.318792	3.06173	0.326613	0.240073		4.72263e-06	0.000513328	0.240329	0.0281012		0.0686104	0.231391	3.09823	0.322765	0.246845		7.78956e-06	0.000482986	0.247086	0.0492621
						0.179077	0	3.12922	0.319568	0.222933		1.89282e-05	0.00045683	0.223161	0.126558													-0.17775	0.319026	3.06168	0.326618	0.240586		4.72921e-06	0.000514042	0.240843	0.0281012		0.0681535	0.231234	3.09816	0.322773	0.247328		7.72293e-06	0.00048279	0.247569	0.0488607
						0.17862	0	3.12904	0.319587	0.22339		1.89282e-05	0.00045683	0.223618	0.126558													-0.178207	0.319262	3.06164	0.326622	0.2411		4.73589e-06	0.000514771	0.241357	0.0281011		0.0676967	0.231078	3.09808	0.32278	0.24781		7.65683e-06	0.000482604	0.248052	0.0484611
						0.178164	0	3.12885	0.319606	0.223847		1.89282e-05	0.00045683	0.224075	0.126558													-0.178664	0.319499	3.0616	0.326627	0.241615		4.73604e-06	0.000515515	0.241873	0.0280614		0.0672399	0.230922	3.09801	0.322788	0.248293		7.65425e-06	0.00048243	0.248534	0.0484623
						0.177707	0	3.12867	0.319625	0.224303		1.89282e-05	0.00045683	0.224532	0.126558													-0.179121	0.319738	3.06155	0.326632	0.24213		4.73297e-06	0.000516275	0.242388	0.028002		0.0667831	0.230767	3.09793	0.322796	0.248775		7.65169e-06	0.000482258	0.249017	0.0484634
						0.17725	0	3.12848	0.319644	0.22476		1.89282e-05	0.00045683	0.224989	0.126558													-0.179578	0.319978	3.06151	0.326637	0.242647		4.74009e-06	0.00051705	0.242905	0.028002		0.0663262	0.230613	3.09786	0.322803	0.249258		7.66819e-06	0.000482088	0.249499	0.048585
						0.176793	0	3.1283	0.319663	0.225217		1.89282e-05	0.00045683	0.225445	0.126558													-0.180034	0.32022	3.06146	0.326641	0.243164		4.74733e-06	0.000517842	0.243423	0.0280019		0.0658694	0.230459	3.09779	0.322811	0.24974		7.72184e-06	0.000481921	0.249981	0.0489418
						0.176336	0	3.12811	0.319682	0.225674		1.89282e-05	0.00045683	0.225902	0.126558													-0.180491	0.320464	3.06142	0.326646	0.243681		4.73281e-06	0.000518651	0.243941	0.0278728		0.0654126	0.230305	3.09771	0.322819	0.250222		7.76385e-06	0.000481755	0.250463	0.049225
						0.175879	0	3.12793	0.319701	0.226131		1.81228e-05	0.00045683	0.226359	0.121173													-0.180948	0.32071	3.06137	0.326651	0.2442		4.53293e-06	0.000519466	0.24446	0.0266537		0.0649557	0.230152	3.09764	0.322827	0.250704		7.77131e-06	0.00048157	0.250944	0.0492913
						0.175423	0	3.12775	0.319719	0.226587		1.81228e-05	0.00045683	0.226816	0.121173													-0.181405	0.320957	3.06133	0.326655	0.24472		4.53951e-06	0.000520198	0.24498	0.0266548		0.0644989	0.23	3.09756	0.322834	0.251185		7.76839e-06	0.000481381	0.251426	0.0492921
						0.174966	0	3.12757	0.319737	0.227044		1.81228e-05	0.00045683	0.227273	0.121173													-0.181862	0.321206	3.06129	0.32666	0.24524		4.54619e-06	0.000520945	0.2455	0.0266558		0.0640421	0.229848	3.09749	0.322842	0.251666		7.7655e-06	0.000481195	0.251907	0.0492929
						0.174509	0	3.12739	0.319755	0.227501		1.81228e-05	0.00045683	0.22773	0.121173													-0.182319	0.321456	3.06125	0.326664	0.245761		4.5496e-06	0.000521706	0.246022	0.0266368		0.0635853	0.229697	3.09741	0.32285	0.252148		7.76264e-06	0.000481011	0.252388	0.0492935
						0.174052	0	3.12722	0.319773	0.227958		1.81228e-05	0.00045683	0.228186	0.121173													-0.182775	0.321708	3.0612	0.326669	0.246282		4.55133e-06	0.000522482	0.246544	0.0266074		0.0631284	0.229546	3.09734	0.322858	0.252629		7.75981e-06	0.00048083	0.252869	0.0492941
						0.173595	0	3.12704	0.319791	0.228415		1.81228e-05	0.00045683	0.228643	0.121173													-0.183232	0.321962	3.06116	0.326674	0.246805		4.55824e-06	0.000523272	0.247067	0.0266076		0.0626716	0.229396	3.09727	0.322865	0.253109		7.75701e-06	0.000480651	0.25335	0.0492946
						0.173138	0	3.12686	0.319809	0.228872		1.81228e-05	0.00045683	0.2291	0.121173													-0.183689	0.322217	3.06112	0.326678	0.247328		4.56526e-06	0.000524079	0.24759	0.0266075		0.0622148	0.229247	3.09719	0.322873	0.25359		7.807e-06	0.000480475	0.25383	0.0496305
						0.172682	0	3.12669	0.319828	0.229328		1.81228e-05	0.00045683	0.229557	0.121173													-0.184146	0.322474	3.06107	0.326683	0.247852		4.5724e-06	0.000524903	0.248115	0.0266073		0.0617579	0.229098	3.09712	0.322881	0.254071		7.80458e-06	0.000480301	0.254311	0.0496331
						0.172225	0	3.12651	0.319846	0.229785		1.81228e-05	0.00045683	0.230014	0.121173													-0.184603	0.322732	3.06103	0.326687	0.248377		4.57965e-06	0.000525744	0.24864	0.0266069		0.0613011	0.22895	3.09704	0.322889	0.254551		7.80181e-06	0.000480129	0.254791	0.0496332
						0.171768	0	3.12633	0.319864	0.230242		1.81228e-05	0.00045683	0.230471	0.121173													-0.18506	0.322993	3.06099	0.326692	0.248903		4.58703e-06	0.000526603	0.249166	0.0266062		0.0608443	0.228802	3.09697	0.322897	0.255031		7.79906e-06	0.00047996	0.255271	0.0496333
						0.171311	0	3.12615	0.319882	0.230699		1.81228e-05	0.00045683	0.230927	0.121173													-0.185516	0.323255	3.06095	0.326696	0.24943		4.57239e-06	0.000527482	0.249693	0.0264771		0.0603874	0.228655	3.09689	0.322904	0.255511		7.85024e-06	0.000479793	0.255751	0.0499764
						0.170854	0	3.12598	0.3199	0.231156		1.73708e-05	0.00045683	0.231384	0.116145													-0.185973	0.323518	3.0609	0.326701	0.249957		4.37002e-06	0.000528367	0.250221	0.0252629		0.0599306	0.228508	3.09682	0.322912	0.255991		7.8597e-06	0.000479607	0.256231	0.050056
						0.170397	0	3.12581	0.319917	0.231613		1.73708e-05	0.00045683	0.231841	0.116145													-0.18643	0.323784	3.06086	0.326705	0.250485		4.37672e-06	0.00052916	0.25075	0.0252637		0.0594738	0.228362	3.09674	0.32292	0.25647		7.85662e-06	0.000479419	0.25671	0.050056
						0.169941	0	3.12564	0.319935	0.232069		1.73708e-05	0.00045683	0.232298	0.116145													-0.186887	0.324051	3.06082	0.32671	0.251015		4.38352e-06	0.000529968	0.25128	0.0252644		0.059017	0.228217	3.09667	0.322928	0.25695		7.85358e-06	0.000479233	0.257189	0.050056
						0.169484	0	3.12547	0.319952	0.232526		1.73708e-05	0.00045683	0.232755	0.116145													-0.187344	0.32432	3.06078	0.326714	0.251544		4.39043e-06	0.000530793	0.25181	0.0252649		0.0585601	0.228072	3.09659	0.322936	0.257429		7.87174e-06	0.00047905	0.257669	0.0501909
						0.169027	0	3.1253	0.319969	0.232983		1.73708e-05	0.00045683	0.233212	0.116145													-0.187801	0.32459	3.06074	0.326718	0.252075		4.39745e-06	0.000531635	0.252341	0.0252652		0.0581033	0.227927	3.09652	0.322944	0.257908		7.87925e-06	0.000478869	0.258148	0.0502578
						0.16857	0	3.12513	0.319987	0.23344		1.73708e-05	0.00045683	0.233668	0.116145													-0.188257	0.324862	3.0607	0.326723	0.252607		4.40458e-06	0.000532494	0.252873	0.0252654		0.0576465	0.227784	3.09644	0.322952	0.258387		7.87625e-06	0.00047869	0.258626	0.0502574
						0.168113	0	3.12496	0.320004	0.233897		1.73708e-05	0.00045683	0.234125	0.116145													-0.188714	0.325135	3.06066	0.326727	0.253139		4.41183e-06	0.000533371	0.253406	0.0252653		0.0571896	0.227641	3.09636	0.322959	0.258866		7.87329e-06	0.000478514	0.259105	0.050257
						0.167656	0	3.12479	0.320022	0.234354		1.73708e-05	0.00045683	0.234582	0.116145													-0.189171	0.325411	3.06062	0.326732	0.253673		4.4192e-06	0.000534267	0.25394	0.0252651		0.0567328	0.227498	3.09629	0.322967	0.259344		7.87035e-06	0.00047834	0.259583	0.0502565
						0.1672	0	3.12462	0.320039	0.23481		1.73708e-05	0.00045683	0.235039	0.116145													-0.189628	0.325688	3.06057	0.326736	0.254207		4.42669e-06	0.000535181	0.254475	0.0252647		0.056276	0.227357	3.09621	0.322975	0.259823		7.86743e-06	0.000478169	0.260062	0.0502559
						0.166743	0	3.12445	0.320056	0.235267		1.73708e-05	0.00045683	0.235496	0.116145													-0.190085	0.325966	3.06053	0.326741	0.254742		4.43431e-06	0.000536116	0.25501	0.025264		0.0558191	0.227215	3.09614	0.322983	0.260301		7.86455e-06	0.000477999	0.26054	0.0502553
						0.166286	0	3.12428	0.320074	0.235724		1.73708e-05	0.00045683	0.235952	0.116145													-0.190542	0.326247	3.06049	0.326745	0.255278		4.41581e-06	0.00053707	0.255547	0.0251139		0.0553623	0.227075	3.09606	0.322991	0.260779		7.92414e-06	0.000477832	0.261018	0.0506538
						0.165829	0	3.12411	0.320091	0.236181		1.66676e-05	0.00045683	0.236409	0.111444													-0.190998	0.326529	3.06045	0.326749	0.255815		4.20657e-06	0.000538033	0.256084	0.0238811		0.0549055	0.226935	3.09599	0.322999	0.261257		7.93846e-06	0.000477648	0.261495	0.0507649
						0.165372	0	3.12395	0.320108	0.236638		1.66676e-05	0.00045683	0.236866	0.111444													-0.191455	0.326814	3.06041	0.326754	0.256353		4.20565e-06	0.000538891	0.256623	0.0238379		0.0544487	0.226795	3.09591	0.323007	0.261734		7.94323e-06	0.000477463	0.261973	0.0508151
						0.164915	0	3.12379	0.320124	0.237095		1.66676e-05	0.00045683	0.237323	0.111444													-0.191912	0.327099	3.06037	0.326758	0.256892		4.2126e-06	0.000539767	0.257162	0.0238385		0.0539918	0.226656	3.09583	0.323015	0.262212		7.94004e-06	0.000477279	0.26245	0.0508143
						0.164459	0	3.12362	0.320141	0.237551		1.66676e-05	0.00045683	0.23778	0.111444													-0.192369	0.327387	3.06033	0.326762	0.257432		4.21965e-06	0.00054066	0.257702	0.023839		0.053535	0.226518	3.09576	0.323023	0.262689		7.93689e-06	0.000477098	0.262927	0.0508133
						0.164002	0	3.12346	0.320158	0.238008		1.66676e-05	0.00045683	0.238237	0.111444													-0.192826	0.327676	3.06029	0.326766	0.257973		4.22683e-06	0.000541573	0.258244	0.0238393		0.0530782	0.22638	3.09568	0.323031	0.263166		7.93376e-06	0.00047692	0.263404	0.0508123
						0.163545	0	3.1233	0.320174	0.238465		1.66676e-05	0.00045683	0.238693	0.111444													-0.193283	0.327967	3.06025	0.32677	0.258514		4.23412e-06	0.000542504	0.258786	0.0238394		0.0526213	0.226244	3.09561	0.323039	0.263643		7.91531e-06	0.000476743	0.263881	0.0507129
						0.163088	0	3.12314	0.320191	0.238922		1.66676e-05	0.00045683	0.23915	0.111444													-0.193739	0.32826	3.06021	0.326775	0.259057		4.24154e-06	0.000543456	0.259329	0.0238394		0.0521645	0.226107	3.09553	0.323046	0.26412		7.83893e-06	0.000476571	0.264358	0.0502417
						0.162631	0	3.12297	0.320208	0.239379		1.66676e-05	0.00045683	0.239607	0.111444													-0.194196	0.328554	3.06017	0.326779	0.2596		4.24909e-06	0.000544428	0.259873	0.0238391		0.0517077	0.225971	3.09546	0.323054	0.264596		7.83645e-06	0.000476411	0.264834	0.0502427
						0.162175	0	3.12281	0.320224	0.239836		1.66676e-05	0.00045683	0.240064	0.111444													-0.194653	0.32885	3.06013	0.326783	0.260145		4.25677e-06	0.000545421	0.260417	0.0238387		0.0512509	0.225836	3.09538	0.323062	0.265073		7.834e-06	0.000476252	0.265311	0.0502437
						0.161718	0	3.12265	0.320241	0.240292		1.66676e-05	0.00045683	0.240521	0.111444													-0.19511	0.329148	3.06009	0.326787	0.26069		4.26458e-06	0.000546436	0.260963	0.0238381		0.050794	0.225702	3.0953	0.32307	0.265549		7.84141e-06	0.000476096	0.265787	0.0503078
						0.161261	0	3.12248	0.320258	0.240749		1.66676e-05	0.00045683	0.240978	0.111444													-0.195567	0.329448	3.06005	0.326792	0.261237		4.25119e-06	0.000547473	0.26151	0.0237183		0.0503372	0.225568	3.09523	0.323078	0.266025		7.89824e-06	0.000475941	0.266263	0.0506888
						0.160804	0	3.12232	0.320274	0.241206		1.60093e-05	0.00045683	0.241434	0.107042													-0.196023	0.32975	3.06001	0.326796	0.261784		4.05684e-06	0.000548519	0.262058	0.0225908		0.0498804	0.225434	3.09515	0.323086	0.266501		7.90875e-06	0.000475771	0.266739	0.0507744
						0.160347	0	3.12217	0.32029	0.241663		1.60093e-05	0.00045683	0.241891	0.107042													-0.19648	0.330053	3.05998	0.3268	0.262333		4.06391e-06	0.00054945	0.262607	0.0225918		0.0494235	0.225301	3.09508	0.323094	0.266977		7.90603e-06	0.0004756	0.267215	0.0507753
						0.15989	0	3.12201	0.320306	0.24212		1.60093e-05	0.00045683	0.242348	0.107042													-0.196937	0.330359	3.05994	0.326804	0.262882		4.0711e-06	0.000550399	0.263157	0.0225928		0.0489667	0.225169	3.095	0.323101	0.267452		7.90334e-06	0.00047543	0.26769	0.0507761
						0.159434	0	3.12185	0.320322	0.242577		1.60093e-05	0.00045683	0.242805	0.107042													-0.197394	0.330666	3.0599	0.326808	0.263432		4.07841e-06	0.000551369	0.263708	0.0225935		0.0485099	0.225037	3.09493	0.323109	0.267928		7.90068e-06	0.000475263	0.268165	0.0507768
						0.158977	0	3.1217	0.320338	0.243033		1.60093e-05	0.00045683	0.243262	0.107042													-0.197851	0.330974	3.05986	0.326812	0.263984		4.08585e-06	0.000552359	0.26426	0.0225942		0.048053	0.224906	3.09485	0.323117	0.268403		7.89803e-06	0.000475098	0.268641	0.0507774
						0.15852	0	3.12154	0.320354	0.24349		1.60093e-05	0.00045683	0.243719	0.107042													-0.198308	0.331285	3.05982	0.326816	0.264536		4.09341e-06	0.000553369	0.264813	0.0225946		0.0475962	0.224776	3.09478	0.323125	0.268878		7.8954e-06	0.000474935	0.269116	0.050778
						0.158063	0	3.12139	0.32037	0.243947		1.60093e-05	0.00045683	0.244175	0.107042													-0.198764	0.331597	3.05978	0.32682	0.26509		4.07726e-06	0.000554401	0.265367	0.0224636		0.0471394	0.224646	3.0947	0.323133	0.269353		7.89102e-06	0.000474774	0.26959	0.050767
						0.157606	0	3.12123	0.320386	0.244404		1.60093e-05	0.00045683	0.244632	0.107042													-0.199221	0.331911	3.05975	0.326824	0.265644		4.07915e-06	0.000555457	0.265922	0.0224313		0.0466826	0.224516	3.09462	0.323141	0.269828		7.88361e-06	0.000474615	0.270065	0.0507364
						0.157149	0	3.12107	0.320402	0.244861		1.60093e-05	0.00045683	0.245089	0.107042													-0.199678	0.332227	3.05971	0.326829	0.266199		4.08695e-06	0.000556537	0.266478	0.0224306		0.0462257	0.224388	3.09455	0.323149	0.270302		7.88105e-06	0.000474457	0.27054	0.0507367
						0.156693	0	3.12092	0.320419	0.245317		1.60093e-05	0.00045683	0.245546	0.107042													-0.200135	0.332545	3.05967	0.326833	0.266756		4.0949e-06	0.000557641	0.267035	0.0224297		0.0457689	0.22426	3.09447	0.323157	0.270777		7.87852e-06	0.000474302	0.271014	0.050737
						0.156236	0	3.12076	0.320435	0.245774		1.60093e-05	0.00045683	0.246003	0.107042													-0.200592	0.332865	3.05963	0.326837	0.267314		4.08187e-06	0.000558769	0.267593	0.0223132		0.0453121	0.224132	3.0944	0.323165	0.271251		7.93948e-06	0.000474149	0.271488	0.0511462
						0.155779	0	3.12061	0.320451	0.246231		1.5392e-05	0.00045683	0.24646	0.102915													-0.201049	0.333187	3.05959	0.326841	0.267872		3.88968e-06	0.000559908	0.268152	0.0212194		0.0448552	0.224005	3.09432	0.323173	0.271725		7.95145e-06	0.000473982	0.271962	0.0512412
						0.155322	0	3.12046	0.320466	0.246688		1.5392e-05	0.00045683	0.246916	0.102915													-0.201505	0.33351	3.05956	0.326845	0.268432		3.89687e-06	0.000560919	0.268713	0.0212203		0.0443984	0.223879	3.09425	0.323181	0.272199		7.94866e-06	0.000473814	0.272436	0.0512415
						0.154865	0	3.12031	0.320481	0.247145		1.5392e-05	0.00045683	0.247373	0.102915													-0.201962	0.333836	3.05952	0.326849	0.268993		3.90418e-06	0.00056195	0.269274	0.0212211		0.0439416	0.223753	3.09417	0.323188	0.272673		7.9459e-06	0.000473648	0.27291	0.0512417
						0.154408	0	3.12016	0.320497	0.247602		1.5392e-05	0.00045683	0.24783	0.102915													-0.202419	0.334163	3.05948	0.326853	0.269555		3.91162e-06	0.000563004	0.269837	0.0212217		0.0434847	0.223628	3.09409	0.323196	0.273147		7.94316e-06	0.000473483	0.273384	0.0512417
						0.153952	0	3.12001	0.320512	0.248058		1.5392e-05	0.00045683	0.248287	0.102915													-0.202876	0.334492	3.05945	0.326856	0.270118		3.91919e-06	0.00056408	0.2704	0.0212222		0.0430279	0.223503	3.09402	0.323204	0.27362		7.92433e-06	0.000473321	0.273857	0.0511378
						0.153495	0	3.11986	0.320527	0.248515		1.5392e-05	0.00045683	0.248744	0.102915													-0.203333	0.334823	3.05941	0.32686	0.270682		3.9269e-06	0.000565179	0.270965	0.0212226		0.0425711	0.22338	3.09394	0.323212	0.274094		7.91321e-06	0.000473161	0.27433	0.0510833
						0.153038	0	3.11971	0.320543	0.248972		1.5392e-05	0.00045683	0.249201	0.102915													-0.20379	0.335156	3.05937	0.326864	0.271247		3.93474e-06	0.000566303	0.271531	0.0212228		0.0421143	0.223256	3.09387	0.32322	0.274567		7.91056e-06	0.000473003	0.274803	0.0510833
						0.152581	0	3.11956	0.320558	0.249429		1.5392e-05	0.00045683	0.249657	0.102915													-0.204246	0.33549	3.05934	0.326868	0.271814		3.94273e-06	0.000567451	0.272097	0.0212229		0.0416574	0.223134	3.09379	0.323228	0.27504		7.90793e-06	0.000472847	0.275276	0.0510831
						0.152124	0	3.11941	0.320574	0.249886		1.5392e-05	0.00045683	0.250114	0.102915													-0.204703	0.335827	3.0593	0.326872	0.272381		3.95087e-06	0.000568624	0.272665	0.0212228		0.0412006	0.223012	3.09371	0.323236	0.275513		7.90532e-06	0.000472692	0.275749	0.0510829
						0.151667	0	3.11926	0.320589	0.250343		1.5392e-05	0.00045683	0.250571	0.102915													-0.20516	0.336166	3.05926	0.326876	0.27295		3.95916e-06	0.000569824	0.273235	0.0212225		0.0407438	0.22289	3.09364	0.323244	0.275985		7.90272e-06	0.00047254	0.276222	0.0510827
						0.151211	0	3.11911	0.320604	0.250799		1.5392e-05	0.00045683	0.251028	0.102915													-0.205617	0.336506	3.05923	0.32688	0.27352		3.92822e-06	0.000571052	0.273805	0.0210114		0.0402869	0.222769	3.09356	0.323252	0.276458		7.96935e-06	0.000472389	0.276694	0.0515298
						0.150754	0	3.11896	0.32062	0.251256		1.48125e-05	0.00045683	0.251485	0.0990397													-0.206074	0.336849	3.05919	0.326884	0.274091		3.7198e-06	0.000572292	0.274377	0.0198535		0.0398301	0.222649	3.09349	0.32326	0.27693		7.98259e-06	0.000472227	0.277166	0.0516332
						0.150297	0	3.11881	0.320635	0.251713		1.48125e-05	0.00045683	0.251942	0.0990397													-0.206531	0.337194	3.05915	0.326888	0.274663		3.73046e-06	0.000573392	0.27495	0.0198722		0.0393733	0.22253	3.09341	0.323268	0.277402		7.97977e-06	0.000472063	0.277638	0.0516328
						0.14984	0	3.11867	0.320649	0.25217		1.48125e-05	0.00045683	0.252398	0.0990397													-0.206987	0.33754	3.05912	0.326891	0.275236		3.73817e-06	0.000574516	0.275524	0.0198743		0.0389165	0.222411	3.09333	0.323276	0.277875		7.93689e-06	0.000471902	0.27811	0.0513729
						0.149383	0	3.11853	0.320664	0.252627		1.48125e-05	0.00045683	0.252855	0.0990397													-0.207444	0.337889	3.05908	0.326895	0.275811		3.74568e-06	0.000575664	0.276099	0.0198745		0.0384596	0.222292	3.09326	0.323284	0.278346		7.93267e-06	0.000471742	0.278582	0.051363
						0.148926	0	3.11838	0.320679	0.253084		1.48125e-05	0.00045683	0.253312	0.0990397													-0.207901	0.338239	3.05905	0.326899	0.276386		3.75333e-06	0.000576838	0.276675	0.0198746		0.0380028	0.222175	3.09318	0.323292	0.278818		7.92996e-06	0.000471584	0.279054	0.0513626
						0.14847	0	3.11824	0.320694	0.25354		1.48125e-05	0.00045683	0.253769	0.0990397													-0.208358	0.338591	3.05901	0.326903	0.276963		3.76112e-06	0.000578037	0.277252	0.0198745		0.037546	0.222058	3.09311	0.3233	0.27929		7.92726e-06	0.000471429	0.279525	0.0513621
						0.148013	0	3.11809	0.320709	0.253997		1.48125e-05	0.00045683	0.254226	0.0990397													-0.208815	0.338945	3.05898	0.326906	0.277541		3.76906e-06	0.000579263	0.277831	0.0198743		0.0370891	0.221941	3.09303	0.323307	0.279761		7.92458e-06	0.000471275	0.279997	0.0513615
						0.147556	0	3.11795	0.320724	0.254454		1.48125e-05	0.00045683	0.254683	0.0990397													-0.209272	0.339301	3.05894	0.32691	0.278121		3.77715e-06	0.000580517	0.278411	0.019874		0.0366323	0.221825	3.09296	0.323315	0.280232		7.92193e-06	0.000471123	0.280468	0.0513608
						0.147099	0	3.11781	0.320738	0.254911		1.48125e-05	0.00045683	0.255139	0.0990397													-0.209728	0.33966	3.05891	0.326914	0.278701		3.7854e-06	0.0005818	0.278992	0.0198735		0.0361755	0.22171	3.09288	0.323323	0.280704		7.91929e-06	0.000470972	0.280939	0.0513601
						0.146642	0	3.11766	0.320753	0.255368		1.48125e-05	0.00045683	0.255596	0.0990397													-0.210185	0.34002	3.05887	0.326918	0.279283		3.7938e-06	0.000583112	0.279574	0.0198728		0.0357186	0.221596	3.0928	0.323331	0.281175		7.91666e-06	0.000470824	0.28141	0.0513593
						0.146185	0	3.11752	0.320768	0.255825		1.48125e-05	0.00045683	0.256053	0.0990397													-0.210642	0.340382	3.05884	0.326922	0.279866		3.78271e-06	0.000584454	0.280158	0.0197691		0.0352618	0.221482	3.09273	0.323339	0.281645		7.97718e-06	0.000470677	0.281881	0.051768
						0.145729	0	3.11737	0.320783	0.256281		1.42677e-05	0.00045683	0.25651	0.0953969													-0.211099	0.340747	3.0588	0.326925	0.280451		3.60486e-06	0.000585809	0.280743	0.0187961		0.034805	0.221368	3.09265	0.323347	0.282116		7.94489e-06	0.00047052	0.282351	0.0515756
						0.145272	0	3.11724	0.320797	0.256738		1.42677e-05	0.00045683	0.256967	0.0953969													-0.211556	0.341113	3.05877	0.326929	0.281036		3.61244e-06	0.000587005	0.28133	0.0187972		0.0343482	0.221256	3.09258	0.323355	0.282587		7.94212e-06	0.000470363	0.282822	0.051575
						0.144815	0	3.1171	0.320811	0.257195		1.42677e-05	0.00045683	0.257423	0.0953969													-0.212013	0.341482	3.05873	0.326933	0.281623		3.5997e-06	0.000588227	0.281917	0.018692		0.0338913	0.221144	3.0925	0.323363	0.283057		7.90536e-06	0.000470207	0.283292	0.0513533
						0.144358	0	3.11696	0.320826	0.257652		1.42677e-05	0.00045683	0.25788	0.0953969													-0.212469	0.341853	3.0587	0.326936	0.282212		3.57515e-06	0.000589478	0.282506	0.0185252		0.0334345	0.221032	3.09242	0.323371	0.283527		7.88528e-06	0.000470057	0.283762	0.0512391
						0.143901	0	3.11682	0.32084	0.258109		1.42677e-05	0.00045683	0.258337	0.0953969													-0.212926	0.342225	3.05867	0.32694	0.282801		3.58293e-06	0.000590763	0.283096	0.0185251		0.0329777	0.220922	3.09235	0.323379	0.283997		7.88298e-06	0.000469912	0.284232	0.05124
						0.143444	0	3.11668	0.320854	0.258566		1.42677e-05	0.00045683	0.258794	0.0953969													-0.213383	0.3426	3.05863	0.326943	0.283392		3.59086e-06	0.000592077	0.283688	0.0185249		0.0325208	0.220811	3.09227	0.323387	0.284467		7.88069e-06	0.000469768	0.284702	0.0512408
						0.142988	0	3.11654	0.320868	0.259022		1.42677e-05	0.00045683	0.259251	0.0953969													-0.21384	0.342976	3.0586	0.326947	0.283984		3.59894e-06	0.000593421	0.284281	0.0185245		0.032064	0.220702	3.0922	0.323395	0.284937		7.87842e-06	0.000469626	0.285172	0.0512415
						0.142531	0	3.1164	0.320883	0.259479		1.42677e-05	0.00045683	0.259708	0.0953969													-0.214297	0.343355	3.05857	0.326951	0.284577		3.60718e-06	0.000594796	0.284875	0.018524		0.0316072	0.220593	3.09212	0.323402	0.285406		7.87616e-06	0.000469485	0.285641	0.0512422
						0.142074	0	3.11627	0.320897	0.259936		1.42677e-05	0.00045683	0.260164	0.0953969													-0.214753	0.343736	3.05853	0.326954	0.285172		3.61559e-06	0.000596203	0.28547	0.0185234		0.0311503	0.220485	3.09205	0.32341	0.285876		7.85675e-06	0.000469347	0.286111	0.0511311
						0.141617	0	3.11613	0.320911	0.260393		1.42677e-05	0.00045683	0.260621	0.0953969													-0.21521	0.344119	3.0585	0.326958	0.285768		3.62417e-06	0.000597644	0.286067	0.0185226		0.0306935	0.220377	3.09197	0.323418	0.286345		7.81955e-06	0.000469209	0.28658	0.0509038
						0.14116	0	3.11599	0.320925	0.26085		1.42677e-05	0.00045683	0.261078	0.0953969													-0.215667	0.344505	3.05847	0.326961	0.286366		3.61385e-06	0.000599119	0.286665	0.0184243		0.0302367	0.22027	3.0919	0.323426	0.286815		7.88195e-06	0.000469073	0.287049	0.0513249
						0.140704	0	3.11585	0.32094	0.261307		1.37548e-05	0.00045683	0.261535	0.0919676													-0.216124	0.344892	3.05843	0.326965	0.286965		3.44179e-06	0.000600608	0.287265	0.0175037		0.0297799	0.220164	3.09182	0.323434	0.287284		7.8946e-06	0.000468929	0.287518	0.0514231
						0.140247	0	3.11572	0.320953	0.261763		1.37548e-05	0.00045683	0.261992	0.0919676													-0.216581	0.345282	3.0584	0.326968	0.287566		3.44953e-06	0.000601921	0.287867	0.0175047		0.029323	0.220058	3.09175	0.323442	0.287753		7.89225e-06	0.000468783	0.287987	0.0514238
						0.13979	0	3.11558	0.320967	0.26222		1.37548e-05	0.00045683	0.262449	0.0919676													-0.217038	0.345674	3.05837	0.326972	0.288168		3.45741e-06	0.000603262	0.288469	0.0175057		0.0288662	0.219953	3.09167	0.32345	0.288221		7.88992e-06	0.00046864	0.288456	0.0514244
						0.139333	0	3.11545	0.320981	0.262677		1.37548e-05	0.00045683	0.262905	0.0919676													-0.217494	0.346068	3.05833	0.326975	0.288771		3.46545e-06	0.000604634	0.289073	0.0175066		0.0284094	0.219848	3.0916	0.323458	0.28869		7.88761e-06	0.000468498	0.288924	0.0514249
						0.138876	0	3.11532	0.320995	0.263134		1.37548e-05	0.00045683	0.263362	0.0919676													-0.217951	0.346464	3.0583	0.326979	0.289375		3.45369e-06	0.000606036	0.289678	0.0174068		0.0279525	0.219744	3.09152	0.323465	0.289158		7.88531e-06	0.000468357	0.289393	0.0514253
						0.138419	0	3.11518	0.321008	0.263591		1.37548e-05	0.00045683	0.263819	0.0919676													-0.218408	0.346862	3.05827	0.326982	0.289982		3.41992e-06	0.000607474	0.290285	0.0171958		0.0274957	0.219641	3.09144	0.323473	0.289627		7.88302e-06	0.000468219	0.289861	0.0514256
						0.137963	0	3.11505	0.321022	0.264048		1.37548e-05	0.00045683	0.264276	0.0919676													-0.218865	0.347263	3.05824	0.326986	0.290589		3.42817e-06	0.000608955	0.290893	0.0171954		0.0270389	0.219538	3.09137	0.323481	0.290095		7.85552e-06	0.000468081	0.290329	0.0512612
						0.137506	0	3.11492	0.321036	0.264504		1.37548e-05	0.00045683	0.264733	0.0919676													-0.219322	0.347665	3.05821	0.326989	0.291198		3.43659e-06	0.000610471	0.291503	0.0171948		0.0265821	0.219436	3.09129	0.323489	0.290563		7.81234e-06	0.000467946	0.290797	0.0509942
						0.137049	0	3.11478	0.32105	0.264961		1.37548e-05	0.00045683	0.26519	0.0919676													-0.219779	0.34807	3.05817	0.326993	0.291808		3.44518e-06	0.000612024	0.292114	0.0171941		0.0261252	0.219335	3.09122	0.323497	0.291031		7.81016e-06	0.000467812	0.291265	0.0509946
						0.136592	0	3.11465	0.321064	0.265418		1.37548e-05	0.00045683	0.265646	0.0919676													-0.220235	0.348478	3.05814	0.326996	0.29242		3.45396e-06	0.000613615	0.292727	0.0171932		0.0256684	0.219234	3.09115	0.323505	0.291499		7.808e-06	0.000467679	0.291733	0.0509949
						0.136135	0	3.11452	0.321077	0.265875		1.37548e-05	0.00045683	0.266103	0.0919676													-0.220692	0.348887	3.05811	0.326999	0.293034		3.44456e-06	0.000615245	0.293342	0.017101		0.0252116	0.219134	3.09107	0.323513	0.291967		7.87342e-06	0.000467548	0.2922	0.0514366
						0.135678	0	3.11438	0.321091	0.266332		1.32713e-05	0.00045683	0.26656	0.0887349													-0.221149	0.349299	3.05808	0.327003	0.293649		3.27948e-06	0.000616891	0.293958	0.016238		0.0247547	0.219034	3.091	0.32352	0.292434		7.88679e-06	0.00046741	0.292668	0.0515392
						0.135222	0	3.11425	0.321104	0.266788		1.32713e-05	0.00045683	0.267017	0.0887349													-0.221606	0.349714	3.05805	0.327006	0.294266		3.2874e-06	0.00061834	0.294575	0.016239		0.0242979	0.218935	3.09092	0.323528	0.292902		7.88447e-06	0.000467271	0.293135	0.0515394
						0.134765	0	3.11412	0.321118	0.267245		1.32713e-05	0.00045683	0.267474	0.0887349													-0.222063	0.350131	3.05802	0.327009	0.294885		3.29547e-06	0.000619822	0.295194	0.01624		0.0238411	0.218837	3.09084	0.323536	0.293369		7.88217e-06	0.000467133	0.293602	0.0515395
						0.134308	0	3.114	0.321131	0.267702		1.32713e-05	0.00045683	0.267931	0.0887349													-0.22252	0.35055	3.05798	0.327013	0.295504		3.30371e-06	0.000621338	0.295815	0.0162409		0.0233842	0.21874	3.09077	0.323544	0.293836		7.87989e-06	0.000466998	0.294069	0.0515395
						0.133851	0	3.11387	0.321144	0.268159		1.32713e-05	0.00045683	0.268387	0.0887349													-0.222976	0.350971	3.05795	0.327016	0.296126		3.31211e-06	0.00062289	0.296437	0.0162416		0.0229274	0.218643	3.09069	0.323552	0.294303		7.85056e-06	0.000466863	0.294536	0.0513625
						0.133394	0	3.11374	0.321157	0.268616		1.32713e-05	0.00045683	0.268844	0.0887349													-0.223433	0.351394	3.05792	0.327019	0.296749		3.31052e-06	0.000624478	0.297061	0.0161926		0.0224706	0.218546	3.09062	0.32356	0.29477		7.79625e-06	0.000466731	0.295003	0.0510217
						0.132937	0	3.11361	0.321171	0.269073		1.32713e-05	0.00045683	0.269301	0.0887349													-0.22389	0.35182	3.05789	0.327023	0.297373		3.25829e-06	0.000626106	0.297686	0.0158956		0.0220138	0.218451	3.09054	0.323568	0.295236		7.79409e-06	0.0004666	0.29547	0.0510219
						0.132481	0	3.11348	0.321184	0.269529		1.32713e-05	0.00045683	0.269758	0.0887349													-0.224347	0.352248	3.05786	0.327026	0.297999		3.26692e-06	0.000627789	0.298313	0.015895		0.0215569	0.218356	3.09047	0.323575	0.295703		7.79194e-06	0.00046647	0.295936	0.051022
						0.132024	0	3.11335	0.321197	0.269986		1.32713e-05	0.00045683	0.270215	0.0887349													-0.224804	0.352679	3.05783	0.327029	0.298627		3.27573e-06	0.000629513	0.298942	0.0158942		0.0211001	0.218262	3.0904	0.323583	0.29617		7.7898e-06	0.000466342	0.296403	0.051022
						0.131567	0	3.11322	0.32121	0.270443		1.32713e-05	0.00045683	0.270672	0.0887349													-0.225261	0.353112	3.0578	0.327032	0.299256		3.28474e-06	0.000631282	0.299572	0.0158933		0.0206433	0.218168	3.09032	0.323591	0.296636		7.78768e-06	0.000466215	0.296869	0.0510219
						0.13111	0	3.11309	0.321224	0.2709		1.32713e-05	0.00045683	0.271128	0.0887349													-0.225717	0.353548	3.05777	0.327036	0.299888		3.27641e-06	0.000633096	0.300204	0.0158075		0.0201864	0.218075	3.09025	0.323599	0.297102		7.85529e-06	0.00046609	0.297335	0.0514787
						0.130653	0	3.11297	0.321237	0.271357		1.28149e-05	0.00045683	0.271585	0.0856834													-0.226174	0.353986	3.05774	0.327039	0.300521		3.11933e-06	0.000634929	0.300838	0.0150062		0.0197296	0.217982	3.09017	0.323607	0.297568		7.86921e-06	0.000465959	0.297801	0.0515844
						0.130196	0	3.11284	0.32125	0.271814		1.28149e-05	0.00045683	0.272042	0.0856834													-0.226631	0.354427	3.05771	0.327042	0.301156		3.12747e-06	0.000636541	0.301474	0.0150073		0.0192728	0.217891	3.0901	0.323614	0.298034		7.86695e-06	0.000465827	0.298267	0.0515842
						0.12974	0	3.11272	0.321263	0.27227		1.28149e-05	0.00045683	0.272499	0.0856834													-0.227088	0.35487	3.05768	0.327045	0.301792		3.13578e-06	0.000638191	0.302111	0.0150082		0.0188159	0.217799	3.09002	0.323622	0.2985		7.84592e-06	0.000465697	0.298733	0.0514607
						0.129283	0	3.11259	0.321275	0.272727		1.28149e-05	0.00045683	0.272956	0.0856834													-0.227545	0.355316	3.05765	0.327048	0.302431		3.14426e-06	0.00063988	0.30275	0.0150091		0.0183591	0.217709	3.08995	0.32363	0.298966		7.7715e-06	0.000465568	0.299198	0.0509867
						0.128826	0	3.11247	0.321288	0.273184		1.28149e-05	0.00045683	0.273413	0.0856834													-0.228002	0.355764	3.05762	0.327052	0.30307		3.15292e-06	0.00064161	0.303391	0.0150099		0.0179023	0.217619	3.08987	0.323638	0.299431		7.76938e-06	0.000465441	0.299664	0.0509867
						0.128369	0	3.11235	0.321301	0.273641		1.28149e-05	0.00045683	0.273869	0.0856834													-0.228458	0.356214	3.05759	0.327055	0.303712		3.16177e-06	0.000643382	0.304034	0.0150105		0.0174455	0.21753	3.0898	0.323646	0.299897		7.76727e-06	0.000465315	0.300129	0.0509867
						0.127912	0	3.11222	0.321314	0.274098		1.28149e-05	0.00045683	0.274326	0.0856834													-0.228915	0.356667	3.05756	0.327058	0.304355		3.11135e-06	0.000645198	0.304678	0.0147296		0.0169886	0.217442	3.08972	0.323653	0.300362		7.76518e-06	0.000465191	0.300595	0.0509865
						0.127455	0	3.1121	0.321327	0.274555		1.28149e-05	0.00045683	0.274783	0.0856834													-0.229372	0.357123	3.05753	0.327061	0.305001		3.09e-06	0.000645038	0.305323	0.0146322		0.0165318	0.217354	3.08965	0.323661	0.300827		7.76309e-06	0.000465069	0.30106	0.0509862
						0.126999	0	3.11197	0.32134	0.275011		1.28149e-05	0.00045683	0.27524	0.0856834													-0.229827	0.35758	3.05751	0.327064	0.305646		3.08077e-06	0.000643147	0.305967	0.0146314		0.016075	0.217267	3.08958	0.323669	0.301292		7.76102e-06	0.000464947	0.301525	0.0509859
						0.126542	0	3.11185	0.321352	0.275468		1.28149e-05	0.00045683	0.275697	0.0856834													-0.23028	0.358037	3.05748	0.327067	0.306289		3.0715e-06	0.000641251	0.306609	0.0146304		0.0156181	0.21718	3.0895	0.323677	0.301757		7.75895e-06	0.000464828	0.30199	0.0509855
						0.126085	0	3.11173	0.321365	0.275925		1.28149e-05	0.00045683	0.276153	0.0856834													-0.23073	0.358493	3.05745	0.32707	0.30693		3.0539e-06	0.000639352	0.30725	0.0145898		0.0151613	0.217094	3.08943	0.323685	0.302222		7.82793e-06	0.000464709	0.302454	0.0514518
						0.125628	0	3.1116	0.321378	0.276382		1.23835e-05	0.00045683	0.27661	0.082799													-0.231177	0.35895	3.05742	0.327073	0.307569		2.88309e-06	0.000637464	0.307888	0.0138146		0.0147045	0.217009	3.08935	0.323692	0.302687		7.84223e-06	0.000464586	0.302919	0.0515595
						0.125171	0	3.11148	0.32139	0.276839		1.23835e-05	0.00045683	0.277067	0.082799													-0.231622	0.359407	3.05739	0.327076	0.308207		2.87602e-06	0.000635854	0.308525	0.0138156		0.0142477	0.216925	3.08928	0.3237	0.303151		7.74141e-06	0.000464462	0.303384	0.0509102
						0.124714	0	3.11136	0.321403	0.277296		1.23835e-05	0.00045683	0.277524	0.082799													-0.232064	0.359864	3.05737	0.327079	0.308843		2.86892e-06	0.000634241	0.30916	0.0138165		0.0137908	0.216841	3.0892	0.323708	0.303616		7.73628e-06	0.00046434	0.303848	0.0508899
						0.124258	0	3.11124	0.321415	0.277752		1.23835e-05	0.00045683	0.277981	0.082799													-0.232504	0.360321	3.05734	0.327082	0.309477		2.86178e-06	0.000632624	0.309793	0.0138174		0.013334	0.216757	3.08913	0.323716	0.30408		7.73425e-06	0.000464219	0.304312	0.0508897
						0.123801	0	3.11112	0.321428	0.278209		1.23835e-05	0.00045683	0.278438	0.082799													-0.232942	0.360778	3.05731	0.327085	0.31011		2.85461e-06	0.000631003	0.310425	0.0138182		0.0128772	0.216675	3.08906	0.323723	0.304544		7.73222e-06	0.0004641	0.304776	0.0508895
						0.123344	0	3.111	0.32144	0.278666		1.23835e-05	0.00045683	0.278894	0.082799													-0.233377	0.361234	3.05728	0.327088	0.310741		2.8474e-06	0.000629379	0.311055	0.0138189		0.0124203	0.216593	3.08898	0.323731	0.305008		7.7302e-06	0.000463982	0.30524	0.0508891
						0.122887	0	3.11088	0.321452	0.279123		1.23835e-05	0.00045683	0.279351	0.082799													-0.23381	0.361691	3.05726	0.32709	0.31137		2.77825e-06	0.000627751	0.311684	0.0135182		0.0119635	0.216512	3.08891	0.323739	0.305472		7.72819e-06	0.000463866	0.305704	0.0508886
						0.12243	0	3.11076	0.321465	0.27958		1.23835e-05	0.00045683	0.279808	0.082799													-0.234241	0.362148	3.05723	0.327093	0.311998		2.74938e-06	0.000626102	0.312311	0.0134129		0.0115067	0.216432	3.08884	0.323747	0.305936		7.72619e-06	0.000463751	0.306168	0.050888
						0.121974	0	3.11064	0.321477	0.280037		1.23835e-05	0.00045683	0.280265	0.082799													-0.234669	0.362605	3.05721	0.327096	0.312624		2.74195e-06	0.000624445	0.312936	0.0134122		0.0110498	0.216352	3.08876	0.323754	0.3064		7.7242e-06	0.000463638	0.306632	0.0508874
						0.121517	0	3.11052	0.321489	0.280493		1.23835e-05	0.00045683	0.280722	0.082799													-0.235095	0.363062	3.05718	0.327099	0.313248		2.73449e-06	0.000622783	0.31356	0.0134114		0.010593	0.216273	3.08869	0.323762	0.306864		7.72222e-06	0.000463526	0.307095	0.0508866
						0.12106	0	3.1104	0.321502	0.28095		1.23835e-05	0.00045683	0.281179	0.082799													-0.235518	0.363519	3.05716	0.327101	0.313871		2.72699e-06	0.000621118	0.314182	0.0134105		0.0101362	0.216194	3.08861	0.32377	0.307327		7.72197e-06	0.000463415	0.307559	0.0508972
						0.120603	0	3.11028	0.321514	0.281407		1.19752e-05	0.00045683	0.281635	0.0800688													-0.235939	0.363975	3.05713	0.327104	0.314492		2.65609e-06	0.000619449	0.314802	0.013097		0.00967936	0.216116	3.08854	0.323777	0.307791		7.68442e-06	0.0004633	0.308022	0.0506622
						0.120146	0	3.11017	0.321526	0.281864		1.19752e-05	0.00045683	0.282092	0.0800688													-0.236357	0.364432	3.05711	0.327107	0.315112		2.5627e-06	0.000617887	0.315421	0.0126684		0.00922253	0.216039	3.08847	0.323785	0.308254		7.67348e-06	0.000463187	0.308486	0.0506025
						0.119689	0	3.11005	0.321538	0.282321		1.19752e-05	0.00045683	0.282549	0.0800688													-0.236773	0.364889	3.05708	0.327109	0.315729		2.55702e-06	0.000616473	0.316038	0.0126694		0.0087657	0.215963	3.08839	0.323793	0.308717		7.67177e-06	0.000463076	0.308949	0.0506033
						0.119233	0	3.10994	0.32155	0.282778		1.19752e-05	0.00045683	0.283006	0.0800688													-0.237187	0.365346	3.05706	0.327112	0.316346		2.55132e-06	0.000615056	0.316653	0.0126703		0.00830887	0.215887	3.08832	0.323801	0.30918		7.67006e-06	0.000462967	0.309412	0.050604
						0.118776	0	3.10982	0.321562	0.283234		1.19752e-05	0.00045683	0.283463	0.0800688													-0.237599	0.365803	3.05703	0.327115	0.316961		2.54559e-06	0.000613635	0.317268	0.0126711		0.00785204	0.215812	3.08825	0.323808	0.309643		7.66836e-06	0.000462859	0.309875	0.0506045
						0.118319	0	3.1097	0.321574	0.283691		1.19752e-05	0.00045683	0.28392	0.0800688													-0.238009	0.36626	3.05701	0.327117	0.317575		2.53983e-06	0.000612211	0.317881	0.0126718		0.00739521	0.215737	3.08817	0.323816	0.310106		7.66667e-06	0.000462752	0.310337	0.050605
						0.117862	0	3.10959	0.321586	0.284148		1.19752e-05	0.00045683	0.284376	0.0800688													-0.238416	0.366716	3.05699	0.32712	0.318187		2.47027e-06	0.000610783	0.318492	0.0123536		0.00693838	0.215663	3.0881	0.323824	0.310569		7.66498e-06	0.000462647	0.3108	0.0506054
						0.117405	0	3.10947	0.321598	0.284605		1.19752e-05	0.00045683	0.284833	0.0800688													-0.238822	0.367173	3.05696	0.327122	0.318798		2.44222e-06	0.000609336	0.319102	0.0122423		0.00648155	0.21559	3.08803	0.323831	0.311031		7.66329e-06	0.000462542	0.311263	0.0506057
						0.116948	0	3.10936	0.32161	0.285062		1.19752e-05	0.00045683	0.28529	0.0800688													-0.239225	0.36763	3.05694	0.327125	0.319407		2.43627e-06	0.00060788	0.319711	0.0122417		0.00602472	0.215518	3.08796	0.323839	0.311494		7.64385e-06	0.00046244	0.311725	0.0504885
						0.116492	0	3.10924	0.321622	0.285519		1.19752e-05	0.00045683	0.285747	0.0800688													-0.239626	0.368087	3.05692	0.327127	0.320015		2.4303e-06	0.000606421	0.320318	0.0122411		0.00556789	0.215446	3.08788	0.323846	0.311956		7.55766e-06	0.000462338	0.312188	0.0499301
						0.116035	0	3.10912	0.321634	0.285975		1.19752e-05	0.00045683	0.286204	0.0800688													-0.240025	0.368544	3.05689	0.327129	0.320621		2.42429e-06	0.000604958	0.320924	0.0122404		0.00511106	0.215375	3.08781	0.323854	0.312419		7.61509e-06	0.000462238	0.31265	0.0503205
						0.115578	0	3.10901	0.321646	0.286432		1.15881e-05	0.00045683	0.286661	0.0774809													-0.240421	0.369001	3.05687	0.327132	0.321226		2.41824e-06	0.000603492	0.321528	0.0122395		0.00465423	0.215304	3.08774	0.323862	0.312881		7.62715e-06	0.000462134	0.313112	0.0504115
						0.115121	0	3.1089	0.321658	0.286889		1.15881e-05	0.00045683	0.287117	0.0774809													-0.240816	0.369457	3.05685	0.327134	0.32183		2.41163e-06	0.000602022	0.322131	0.0122358		0.0041974	0.215234	3.08767	0.323869	0.313343		7.62553e-06	0.000462031	0.313574	0.0504121
						0.114664	0	3.10878	0.321669	0.287346		1.15881e-05	0.00045683	0.287574	0.0774809													-0.241208	0.369914	3.05683	0.327137	0.322432		2.27485e-06	0.00060055	0.322732	0.0115702		0.00374057	0.215165	3.08759	0.323877	0.313805		7.62392e-06	0.000461929	0.314036	0.0504125
						0.114207	0	3.10867	0.321681	0.287803		1.15881e-05	0.00045683	0.288031	0.0774809													-0.241597	0.370371	3.05681	0.327139	0.323032		2.27032e-06	0.000599306	0.323332	0.0115711		0.00328374	0.215097	3.08752	0.323885	0.314267		7.62231e-06	0.000461828	0.314498	0.0504129
						0.113751	0	3.10856	0.321692	0.288259		1.15881e-05	0.00045683	0.288488	0.0774809													-0.241985	0.370828	3.05678	0.327141	0.323632		2.26576e-06	0.000598058	0.323931	0.0115719		0.00282691	0.215029	3.08745	0.323892	0.314729		7.62071e-06	0.000461728	0.31496	0.0504132
						0.113294	0	3.10845	0.321704	0.288716		1.15881e-05	0.00045683	0.288945	0.0774809													-0.242371	0.371285	3.05676	0.327143	0.32423		2.26118e-06	0.000596807	0.324528	0.0115727		0.00237008	0.214962	3.08737	0.3239	0.315191		7.61911e-06	0.00046163	0.315421	0.0504133
						0.112837	0	3.10834	0.321715	0.289173		1.15881e-05	0.00045683	0.289402	0.0774809													-0.242755	0.371741	3.05674	0.327146	0.324826		2.19142e-06	0.000595553	0.325124	0.0112393		0.00191325	0.214896	3.0873	0.323907	0.315652		7.61751e-06	0.000461533	0.315883	0.0504134
						0.11238	0	3.10822	0.321727	0.28963		1.15881e-05	0.00045683	0.289858	0.0774809													-0.243137	0.372198	3.05672	0.327148	0.325422		2.16409e-06	0.000594282	0.325719	0.0111229		0.00145642	0.21483	3.08723	0.323915	0.316114		7.54922e-06	0.000461437	0.316345	0.0499717
						0.111923	0	3.10811	0.321739	0.290087		1.15881e-05	0.00045683	0.290315	0.0774809													-0.243518	0.372655	3.0567	0.32715	0.326016		2.15936e-06	0.000593002	0.326313	0.0111226		0.000999595	0.214765	3.08716	0.323923	0.316575		7.5043e-06	0.000461343	0.316806	0.0496846
						0.111466	0	3.108	0.32175	0.290544		1.15881e-05	0.00045683	0.290772	0.0774809													-0.243896	0.373112	3.05668	0.327152	0.326609		2.1546e-06	0.000591719	0.326905	0.0111221		0.000542765	0.2147	3.08709	0.32393	0.317037		7.50286e-06	0.00046125	0.317267	0.0496851
						0.11101	0	3.10789	0.321762	0.291		1.15881e-05	0.00045683	0.291229	0.0774809													-0.244272	0.373569	3.05666	0.327154	0.327201		2.14982e-06	0.000590433	0.327496	0.0111216		8.59358e-05	0.214637	3.08701	0.323938	0.317498		7.55954e-06	0.000461158	0.317728	0.0500704
						0.110553	0	3.10778	0.321773	0.291457		1.12208e-05	0.00045683	0.291686	0.0750246													-0.244646	0.374026	3.05664	0.327157	0.327791		2.14501e-06	0.000589144	0.328086	0.011121		-0.000370894	0.214574	3.08694	0.323945	0.317959		7.57152e-06	0.000461063	0.31819	0.05016
						0.110096	0	3.10767	0.321785	0.291914		1.12208e-05	0.00045683	0.292143	0.0750246													-0.245018	0.374482	3.05662	0.327159	0.328381		2.14017e-06	0.000587852	0.328675	0.0111203		-0.000827723	0.214511	3.08687	0.323953	0.31842		7.57002e-06	0.000460969	0.318651	0.0501603
						0.109639	0	3.10756	0.321796	0.292371		1.12208e-05	0.00045683	0.292599	0.0750246													-0.245388	0.374939	3.0566	0.327161	0.328968		2.1353e-06	0.000586557	0.329262	0.0111195		-0.00128455	0.21445	3.0868	0.32396	0.318881		7.56853e-06	0.000460877	0.319111	0.0501605
						0.109182	0	3.10745	0.321807	0.292828		1.12208e-05	0.00045683	0.293056	0.0750246													-0.245756	0.375396	3.05658	0.327163	0.329555		2.13041e-06	0.000585259	0.329848	0.0111186		-0.00174138	0.214389	3.08673	0.323968	0.319342		7.56704e-06	0.000460785	0.319572	0.0501606
						0.108725	0	3.10734	0.321818	0.293285		1.12208e-05	0.00045683	0.293513	0.0750246													-0.246122	0.375853	3.05656	0.327165	0.33014		2.04598e-06	0.000583958	0.330432	0.0107017		-0.00219821	0.214329	3.08665	0.323975	0.319803		7.56556e-06	0.000460695	0.320033	0.0501606
						0.108269	0	3.10724	0.321829	0.293741		1.12208e-05	0.00045683	0.29397	0.0750246													-0.246485	0.37631	3.05654	0.327167	0.330724		2.00786e-06	0.000582797	0.331016	0.0105233		-0.00265504	0.214269	3.08658	0.323983	0.320263		7.56407e-06	0.000460606	0.320494	0.0501605
						0.107812	0	3.10713	0.321841	0.294198		1.12208e-05	0.00045683	0.294427	0.0750246													-0.246847	0.376767	3.05652	0.327169	0.331307		1.93795e-06	0.000581695	0.331598	0.0101761		-0.00311187	0.21421	3.08651	0.323991	0.320724		7.4555e-06	0.000460518	0.320954	0.0494499
						0.107355	0	3.10702	0.321852	0.294655		1.12208e-05	0.00045683	0.294884	0.0750246													-0.247207	0.377223	3.0565	0.327171	0.331889		1.91122e-06	0.000580578	0.332179	0.0100551		-0.0035687	0.214152	3.08644	0.323998	0.321185		7.44442e-06	0.000460432	0.321415	0.0493857
						0.106898	0	3.10691	0.321863	0.295112		1.12208e-05	0.00045683	0.29534	0.0750246													-0.247566	0.37768	3.05649	0.327173	0.332469		1.90748e-06	0.000579454	0.332759	0.0100549		-0.00402553	0.214095	3.08637	0.324005	0.321645		7.44311e-06	0.000460346	0.321875	0.0493861
						0.106441	0	3.1068	0.321874	0.295569		1.12208e-05	0.00045683	0.295797	0.0750246													-0.247922	0.378137	3.05647	0.327175	0.333049		1.90373e-06	0.000578328	0.333338	0.0100546		-0.00448236	0.214038	3.0863	0.324013	0.322105		7.4418e-06	0.000460262	0.322335	0.0493864
						0.105984	0	3.10669	0.321886	0.296026		1.12208e-05	0.00045683	0.296254	0.0750246													-0.248277	0.378594	3.05645	0.327177	0.333627		1.89995e-06	0.000577199	0.333916	0.0100543		-0.00493919	0.213982	3.08623	0.32402	0.322566		7.49704e-06	0.000460179	0.322796	0.049762
						0.105528	0	3.10659	0.321897	0.296482		1.08716e-05	0.00045683	0.296711	0.0726898													-0.248629	0.379051	3.05643	0.327179	0.334204		1.89615e-06	0.000576067	0.334492	0.0100539		-0.00539602	0.213926	3.08615	0.324028	0.323026		7.50879e-06	0.000460095	0.323256	0.0498492
						0.105071	0	3.10648	0.321908	0.296939		1.08716e-05	0.00045683	0.297168	0.0726898													-0.24898	0.379508	3.05642	0.327181	0.33478		1.89233e-06	0.000574933	0.335068	0.0100535		-0.00585285	0.213871	3.08608	0.324035	0.323486		7.50743e-06	0.000460011	0.323716	0.0498493
						0.104614	0	3.10638	0.321919	0.297396		1.08716e-05	0.00045683	0.297624	0.0726898													-0.249329	0.379964	3.0564	0.327182	0.335355		1.89659e-06	0.000573797	0.335642	0.010096		-0.00630968	0.213817	3.08601	0.324043	0.323946		7.50608e-06	0.000459928	0.324176	0.0498492
						0.104157	0	3.10627	0.321929	0.297853		1.08716e-05	0.00045683	0.298081	0.0726898													-0.249677	0.380421	3.05638	0.327184	0.335929		1.89452e-06	0.000572657	0.336215	0.0101051		-0.00676651	0.213764	3.08594	0.32405	0.324406		7.50472e-06	0.000459847	0.324636	0.049849
						0.1037	0	3.10617	0.32194	0.29831		1.08716e-05	0.00045683	0.298538	0.0726898													-0.250022	0.380878	3.05636	0.327186	0.336502		1.8908e-06	0.000571516	0.336787	0.0101054		-0.00722334	0.213712	3.08587	0.324058	0.324866		7.49117e-06	0.000459766	0.325095	0.0497677
						0.103243	0	3.10606	0.321951	0.298767		1.08716e-05	0.00045683	0.298995	0.0726898													-0.250365	0.381335	3.05635	0.327188	0.337073		1.88707e-06	0.000570371	0.337358	0.0101057		-0.00768017	0.21366	3.0858	0.324065	0.325325		7.37959e-06	0.000459687	0.325555	0.0490349
						0.102787	0	3.10596	0.321962	0.299223		1.08716e-05	0.00045683	0.299452	0.0726898													-0.250707	0.381792	3.05633	0.32719	0.337644		1.81634e-06	0.000569224	0.337928	0.00974648		-0.008137	0.213609	3.08573	0.324073	0.325785		7.37841e-06	0.00045961	0.326015	0.0490353
						0.10233	0	3.10585	0.321973	0.29968		1.08716e-05	0.00045683	0.299909	0.0726898													-0.251047	0.382249	3.05631	0.327192	0.338213		1.75206e-06	0.000568068	0.338497	0.00942075		-0.00859383	0.213558	3.08566	0.32408	0.326245		7.37724e-06	0.000459533	0.326474	0.0490357
						0.101873	0	3.10575	0.321984	0.300137		1.08716e-05	0.00045683	0.300365	0.0726898													-0.251384	0.382705	3.05629	0.327194	0.338781		1.688e-06	0.000566975	0.339064	0.00909379		-0.00905066	0.213508	3.08559	0.324087	0.326704		7.37607e-06	0.000459458	0.326934	0.049036
						0.101416	0	3.10564	0.321995	0.300594		1.08716e-05	0.00045683	0.300822	0.0726898													-0.25172	0.383162	3.05628	0.327195	0.339348		1.68523e-06	0.000565992	0.339631	0.00909461		-0.00950749	0.213459	3.08552	0.324095	0.327164		7.3749e-06	0.000459384	0.327393	0.0490361
						0.100959	0	3.10554	0.322006	0.301051		1.08716e-05	0.00045683	0.301279	0.0726898													-0.252054	0.383619	3.05626	0.327197	0.339914		1.68245e-06	0.000565008	0.340196	0.00909539		-0.00996432	0.213411	3.08545	0.324102	0.327623		7.42806e-06	0.000459311	0.327853	0.0493974
						0.100503	0	3.10543	0.322016	0.301508		1.05392e-05	0.00045683	0.301736	0.0704674													-0.252387	0.384076	3.05625	0.327199	0.340479		1.67964e-06	0.000564022	0.340761	0.00909613		-0.0104211	0.213363	3.08538	0.32411	0.328082		7.43945e-06	0.000459237	0.328312	0.0494811
						0.100046	0	3.10533	0.322027	0.301964		1.05392e-05	0.00045683	0.302193	0.0704674													-0.252717	0.384533	3.05623	0.3272	0.341043		1.67683e-06	0.000563034	0.341324	0.00909681		-0.010878	0.213316	3.0853	0.324117	0.328542		7.43824e-06	0.000459163	0.328771	0.049481
						0.0995889	0	3.10523	0.322037	0.302421		1.05392e-05	0.00045683	0.30265	0.0704674													-0.253047	0.38499	3.05622	0.327202	0.341606		1.674e-06	0.000562045	0.341887	0.00909745		-0.0113348	0.21327	3.08523	0.324125	0.329001		7.43704e-06	0.000459091	0.32923	0.0494807
						0.099132	0	3.10513	0.322048	0.302878		1.05392e-05	0.00045683	0.303106	0.0704674													-0.253374	0.385446	3.0562	0.327204	0.342168		1.67115e-06	0.000561053	0.342448	0.00909804		-0.0117916	0.213224	3.08516	0.324132	0.32946		7.41712e-06	0.000459021	0.329689	0.0493558
						0.0986752	0	3.10503	0.322059	0.303335		1.05392e-05	0.00045683	0.303563	0.0704674													-0.2537	0.385903	3.05618	0.327205	0.342729		1.66829e-06	0.000560059	0.343009	0.00909858		-0.0122485	0.21318	3.08509	0.324139	0.329919		7.3077e-06	0.000458951	0.330148	0.0486351
						0.0982184	0	3.10492	0.322069	0.303792		1.05392e-05	0.00045683	0.30402	0.0704674													-0.254024	0.38636	3.05617	0.327207	0.343289		1.66541e-06	0.000559063	0.343569	0.00909906		-0.0127053	0.213136	3.08502	0.324147	0.330378		7.30668e-06	0.000458883	0.330607	0.0486355
						0.0977615	0	3.10482	0.32208	0.304249		1.05392e-05	0.00045683	0.304477	0.0704674													-0.254346	0.386817	3.05615	0.327209	0.343848		1.59328e-06	0.000558065	0.344127	0.00872053		-0.0131621	0.213092	3.08495	0.324154	0.330837		7.30567e-06	0.000458816	0.331066	0.0486359
						0.0973047	0	3.10472	0.32209	0.304705		1.05392e-05	0.00045683	0.304934	0.0704674													-0.254666	0.387274	3.05614	0.32721	0.344406		1.56634e-06	0.000557076	0.344685	0.00858829		-0.013619	0.21305	3.08488	0.324161	0.331296		7.30465e-06	0.00045875	0.331525	0.0486361
						0.0968479	0	3.10462	0.322101	0.305162		1.05392e-05	0.00045683	0.305391	0.0704674													-0.254985	0.387731	3.05612	0.327212	0.344963		1.56345e-06	0.000556088	0.345241	0.0085877		-0.0140758	0.213008	3.08481	0.324169	0.331754		7.30364e-06	0.000458685	0.331984	0.0486362
						0.096391	0	3.10452	0.322111	0.305619		1.05392e-05	0.00045683	0.305847	0.0704674													-0.255302	0.388187	3.05611	0.327213	0.345519		1.56056e-06	0.000555099	0.345797	0.00858705		-0.0145326	0.212966	3.08474	0.324176	0.332213		7.30263e-06	0.000458622	0.332442	0.0486362
						0.0959342	0	3.10442	0.322122	0.306076		1.05392e-05	0.00045683	0.306304	0.0704674													-0.255618	0.388644	3.05609	0.327215	0.346074		1.55764e-06	0.000554109	0.346352	0.00858633		-0.0149894	0.212926	3.08468	0.324183	0.332672		7.35309e-06	0.000458559	0.332901	0.048979
						0.0954774	0	3.10431	0.322132	0.306533		1.02223e-05	0.00045683	0.306761	0.0683489													-0.255931	0.389101	3.05608	0.327217	0.346629		1.55471e-06	0.000553116	0.346905	0.00858554		-0.0154463	0.212886	3.08461	0.324191	0.33313		7.36398e-06	0.000458497	0.333359	0.0490582
						0.0950206	0	3.10422	0.322143	0.306989		1.02223e-05	0.00045683	0.307218	0.0683489													-0.256243	0.389558	3.05607	0.327218	0.347182		1.47898e-06	0.000552122	0.347458	0.00818204		-0.0159031	0.212847	3.08454	0.324198	0.333589		7.36294e-06	0.000458435	0.333818	0.0490579
						0.0945637	0	3.10412	0.322153	0.307446		1.02223e-05	0.00045683	0.307675	0.0683489													-0.256553	0.390015	3.05605	0.32722	0.347734		1.4666e-06	0.000551269	0.348009	0.0081261		-0.0163599	0.212809	3.08447	0.324205	0.334047		7.35516e-06	0.000458374	0.334276	0.0490126
						0.0941069	0	3.10402	0.322163	0.307903		1.02223e-05	0.00045683	0.308132	0.0683489													-0.256862	0.390471	3.05604	0.327221	0.348285		1.4645e-06	0.000550435	0.34856	0.00812681		-0.0168168	0.212771	3.0844	0.324213	0.334505		7.23048e-06	0.000458315	0.334735	0.048188
						0.0936501	0	3.10392	0.322173	0.30836		1.02223e-05	0.00045683	0.308588	0.0683489													-0.257169	0.390928	3.05602	0.327223	0.348836		1.4624e-06	0.0005496	0.34911	0.00812748		-0.0172736	0.212734	3.08433	0.32422	0.334964		7.22964e-06	0.000458256	0.335193	0.0481885
						0.0931932	0	3.10382	0.322183	0.308817		1.02223e-05	0.00045683	0.309045	0.0683489													-0.257474	0.391385	3.05601	0.327224	0.349385		1.46029e-06	0.000548764	0.34966	0.00812812		-0.0177304	0.212698	3.08426	0.324227	0.335422		7.2288e-06	0.0004582	0.335651	0.0481889
						0.0927364	0	3.10372	0.322194	0.309274		1.02223e-05	0.00045683	0.309502	0.0683489													-0.257778	0.391842	3.056	0.327225	0.349934		1.38318e-06	0.000547926	0.350208	0.00771068		-0.0181872	0.212663	3.08419	0.324234	0.33588		7.22796e-06	0.000458144	0.336109	0.0481891
						0.0922796	0	3.10362	0.322204	0.30973		1.02223e-05	0.00045683	0.309959	0.0683489													-0.258081	0.392299	3.05598	0.327227	0.350482		1.3553e-06	0.000547208	0.350755	0.00756515		-0.0186441	0.212628	3.08412	0.324242	0.336338		7.22712e-06	0.000458089	0.336567	0.0481893
						0.0918228	0	3.10353	0.322214	0.310187		1.02223e-05	0.00045683	0.310416	0.0683489													-0.258382	0.392756	3.05597	0.327228	0.351029		1.35358e-06	0.000546533	0.351302	0.00756488		-0.0191009	0.212594	3.08405	0.324249	0.336796		7.22628e-06	0.000458036	0.337025	0.0481893
						0.0913659	0	3.10343	0.322224	0.310644		1.02223e-05	0.00045683	0.310873	0.0683489													-0.258682	0.393212	3.05596	0.32723	0.351576		1.35186e-06	0.00054586	0.351848	0.00756458		-0.0195577	0.212561	3.08398	0.324256	0.337254		7.22544e-06	0.000457984	0.337483	0.0481891
						0.0909091	0	3.10333	0.322235	0.311101		1.02223e-05	0.00045683	0.311329	0.0683489													-0.258981	0.393669	3.05595	0.327231	0.352121		1.35014e-06	0.000545189	0.352394	0.00756426		-0.0200146	0.212528	3.08391	0.324263	0.337712		7.27264e-06	0.000457933	0.337941	0.0485093
						0.0904523	0	3.10323	0.322245	0.311558		9.91986e-06	0.00045683	0.311786	0.0663264													-0.259279	0.394126	3.05593	0.327232	0.352667		1.34842e-06	0.00054452	0.352939	0.0075639		-0.0204714	0.212497	3.08384	0.324271	0.33817		7.28291e-06	0.000457882	0.338399	0.0485833
						0.0899954	0	3.10314	0.322255	0.312015		9.91986e-06	0.00045683	0.312243	0.0663264													-0.259575	0.394583	3.05592	0.327234	0.353211		1.3467e-06	0.000543853	0.353483	0.00756352		-0.0209282	0.212466	3.08378	0.324278	0.338628		7.28205e-06	0.000457832	0.338857	0.0485828
						0.0895386	0	3.10304	0.322265	0.312471		9.91986e-06	0.00045683	0.3127	0.0663264													-0.25987	0.39504	3.05591	0.327235	0.353755		1.34498e-06	0.000543187	0.354027	0.00756311		-0.0213851	0.212435	3.08371	0.324285	0.339086		7.17445e-06	0.000457784	0.339315	0.04787
						0.0890818	0	3.10294	0.322275	0.312928		9.91986e-06	0.00045683	0.313157	0.0663264													-0.260164	0.395497	3.0559	0.327236	0.354298		1.34325e-06	0.000542523	0.354569	0.00756268		-0.0218419	0.212406	3.08364	0.324292	0.339544		7.14772e-06	0.000457736	0.339773	0.0476966
						0.0886249	0	3.10285	0.322284	0.313385		9.91986e-06	0.00045683	0.313614	0.0663264													-0.260456	0.395953	3.05588	0.327238	0.354841		1.34153e-06	0.00054186	0.355112	0.00756221		-0.0222987	0.212377	3.08357	0.324299	0.340002		7.14707e-06	0.00045769	0.34023	0.0476971
						0.0881681	0	3.10275	0.322294	0.313842		9.91986e-06	0.00045683	0.31407	0.0663264													-0.260748	0.39641	3.05587	0.327239	0.355383		1.35448e-06	0.000541198	0.355653	0.00764452		-0.0227555	0.212349	3.0835	0.324307	0.340459		7.14641e-06	0.000457645	0.340688	0.0476974
						0.0877113	0	3.10266	0.322304	0.314299		9.91986e-06	0.00045683	0.314527	0.0663264													-0.261038	0.396867	3.05586	0.32724	0.355924		1.25294e-06	0.000540538	0.356194	0.00708009		-0.0232124	0.212322	3.08343	0.324314	0.340917		7.14576e-06	0.000457602	0.341146	0.0476976
						0.0872545	0	3.10256	0.322314	0.314756		9.91986e-06	0.00045683	0.314984	0.0663264													-0.261327	0.397324	3.05585	0.327242	0.356464		1.16786e-06	0.000550185	0.356739	0.00648362		-0.0236692	0.212295	3.08337	0.324321	0.341375		7.14511e-06	0.000457559	0.341603	0.0476976
						0.0867976	0	3.10247	0.322324	0.315212		9.91986e-06	0.00045683	0.315441	0.0663264													-0.261634	0.397781	3.05584	0.327243	0.357014		1.19811e-06	0.000566867	0.357298	0.00645579		-0.024126	0.212269	3.0833	0.324328	0.341832		7.14445e-06	0.000457518	0.342061	0.0476976
						0.0863408	0	3.10237	0.322334	0.315669		9.91986e-06	0.00045683	0.315898	0.0663264													-0.261969	0.398238	3.05582	0.327244	0.357581		1.23551e-06	0.00058882	0.357876	0.00640911		-0.0245829	0.212244	3.08323	0.324335	0.34229		7.1438e-06	0.000457478	0.342518	0.0476974
						0.085884	0	3.10228	0.322344	0.316126		9.91986e-06	0.00045683	0.316354	0.0663264													-0.262341	0.398694	3.05581	0.327245	0.35817		1.28297e-06	0.00061856	0.358479	0.00633536		-0.0250397	0.21222	3.08316	0.324342	0.342747		7.18722e-06	0.000457439	0.342976	0.0479914
						0.0854271	0	3.10218	0.322354	0.316583		9.63068e-06	0.00045683	0.316811	0.0643929													-0.262758	0.399151	3.0558	0.327246	0.358789		1.28893e-06	0.000632673	0.359105	0.0062228		-0.0254965	0.212196	3.08309	0.324349	0.343205		7.19677e-06	0.000457401	0.343433	0.0480591
						0.0849703	0	3.10209	0.322364	0.31704		9.63068e-06	0.00045683	0.317268	0.0643929													-0.263215	0.399589	3.05579	0.327248	0.359421		1.17479e-06	0.000591813	0.359717	0.00606334		-0.0259534	0.212173	3.08303	0.324357	0.343662		7.14323e-06	0.000457364	0.343891	0.0477055
						0.0845135	0	3.102	0.322373	0.317497		9.63068e-06	0.00045683	0.317725	0.0643929													-0.263671	0.399965	3.05578	0.327249	0.360013		1.07453e-06	0.000559041	0.360293	0.00587096		-0.0264102	0.212151	3.08296	0.324364	0.344119		7.06138e-06	0.000457328	0.344348	0.0471625
						0.0840566	0	3.1019	0.322383	0.317953		9.63068e-06	0.00045683	0.318182	0.0643929													-0.264128	0.400287	3.05577	0.32725	0.360572		9.8693e-07	0.000533244	0.360839	0.00565322		-0.026867	0.21213	3.08289	0.324371	0.344577		7.06092e-06	0.000457293	0.344805	0.0471631
						0.0835998	0	3.10181	0.322392	0.31841		9.63068e-06	0.00045683	0.318639	0.0643929													-0.264585	0.400562	3.05576	0.327251	0.361105		9.10776e-07	0.000513293	0.361362	0.00541978		-0.0273238	0.212109	3.08282	0.324378	0.345034		7.06047e-06	0.00045726	0.345263	0.0471635
						0.083143	0	3.10172	0.322402	0.318867		9.63068e-06	0.00045683	0.319095	0.0643929													-0.265042	0.400797	3.05575	0.327252	0.361619		8.65022e-07	0.000498112	0.361868	0.00530438		-0.0277807	0.212089	3.08276	0.324385	0.345491		7.06001e-06	0.000457228	0.34572	0.0471638
						0.0826862	0	3.10162	0.322412	0.319324		9.63068e-06	0.00045683	0.319552	0.0643929													-0.265499	0.400995	3.05574	0.327253	0.362117		8.20049e-07	0.000486731	0.36236	0.0051462		-0.0282375	0.21207	3.08269	0.324392	0.345948		7.05956e-06	0.000457197	0.346177	0.0471639
						0.0822293	0	3.10153	0.322421	0.319781		9.63068e-06	0.00045683	0.320009	0.0643929													-0.265956	0.401163	3.05573	0.327254	0.362604		7.54992e-07	0.000478306	0.362843	0.00482138		-0.0286943	0.212052	3.08262	0.324399	0.346406		7.05911e-06	0.000457167	0.346634	0.0471639
						0.0817725	0	3.10144	0.322431	0.320238		9.63068e-06	0.00045683	0.320466	0.0643929													-0.266412	0.401305	3.05573	0.327254	0.363082		6.2624e-07	0.000472132	0.363318	0.00405147		-0.0291512	0.212035	3.08256	0.324406	0.346863		7.05865e-06	0.000457139	0.347091	0.0471638
						0.0813157	0	3.10135	0.322441	0.320694		9.63068e-06	0.00045683	0.320923	0.0643929													-0.266869	0.401424	3.05572	0.327255	0.363554		5.92528e-07	0.00046763	0.363788	0.00387027		-0.029608	0.212018	3.08249	0.324413	0.34732		7.0582e-06	0.000457112	0.347548	0.0471636
						0.0808588	0	3.10125	0.32245	0.321151		9.63068e-06	0.00045683	0.32138	0.0643929													-0.267326	0.401524	3.05572	0.327256	0.364022		5.63978e-07	0.000464411	0.364254	0.00370933		-0.0300648	0.212002	3.08242	0.32442	0.347777		7.09738e-06	0.000457086	0.348006	0.0474281
						0.080402	0	3.10116	0.32246	0.321608		9.35379e-06	0.00045683	0.321836	0.0625416													-0.267783	0.401607	3.05571	0.327256	0.364486		5.39864e-07	0.000462125	0.364717	0.00356829		-0.0305216	0.211986	3.08235	0.324427	0.348234		7.1061e-06	0.000457061	0.348463	0.047489
						0.0799452	0	3.10107	0.322469	0.322065		9.35379e-06	0.00045683	0.322293	0.0625416													-0.26824	0.401677	3.05571	0.327257	0.364948		5.19547e-07	0.000460513	0.365178	0.00344602		-0.0309785	0.211972	3.08229	0.324434	0.348691		6.99646e-06	0.000457037	0.34892	0.0467587
						0.0794884	0	3.10098	0.322479	0.322522		9.35379e-06	0.00045683	0.32275	0.0625416													-0.268697	0.401735	3.0557	0.327257	0.365409		5.02468e-07	0.000459381	0.365638	0.00334096		-0.0314353	0.211958	3.08222	0.324441	0.349148		6.97082e-06	0.000457014	0.349377	0.0465896
						0.0790315	0	3.10089	0.322488	0.322979		9.35379e-06	0.00045683	0.323207	0.0625416													-0.269153	0.401784	3.0557	0.327258	0.365868		4.88141e-07	0.00045859	0.366097	0.00325129		-0.0318921	0.211945	3.08215	0.324448	0.349605		6.97057e-06	0.000456993	0.349834	0.0465901
						0.0785747	0	3.1008	0.322497	0.323435		9.35379e-06	0.00045683	0.323664	0.0625416													-0.26961	0.401824	3.05569	0.327258	0.366327		4.76147e-07	0.00045804	0.366556	0.00317521		-0.032349	0.211933	3.08209	0.324455	0.350062		6.97033e-06	0.000456973	0.350291	0.0465906
						0.0781179	0	3.10071	0.322507	0.323892		9.35379e-06	0.00045683	0.324121	0.0625416													-0.270067	0.401857	3.05569	0.327259	0.366785		4.66125e-07	0.000457659	0.367014	0.00311097		-0.0328058	0.211921	3.08202	0.324462	0.350519		6.97009e-06	0.000456955	0.350748	0.0465908
						0.077661	0	3.10062	0.322516	0.324349		9.35379e-06	0.00045683	0.324577	0.0625416													-0.270524	0.401885	3.05568	0.327259	0.367242		4.57766e-07	0.000457396	0.367471	0.00305694		-0.0332626	0.211911	3.08195	0.324469	0.350976		6.96985e-06	0.000456937	0.351205	0.046591
						0.0772042	0	3.10053	0.322525	0.324806		9.35379e-06	0.00045683	0.325034	0.0625416													-0.270981	0.401907	3.05568	0.32726	0.3677		4.51182e-07	0.000457215	0.367928	0.00301416		-0.0337195	0.211901	3.08189	0.324476	0.351433		6.9696e-06	0.000456921	0.351662	0.046591
						0.0767474	0	3.10044	0.322535	0.325263		9.35379e-06	0.00045683	0.325491	0.0625416													-0.271438	0.401926	3.05567	0.32726	0.368157		3.94018e-07	0.000457091	0.368386	0.00263299		-0.0341763	0.211892	3.08182	0.324483	0.35189		6.96936e-06	0.000456906	0.352118	0.0465909
						0.0762905	0	3.10035	0.322544	0.32572		9.35379e-06	0.00045683	0.325948	0.0625416													-0.271894	0.401942	3.05567	0.32726	0.368614		3.89482e-07	0.000457005	0.368843	0.00260316		-0.0346331	0.211883	3.08176	0.32449	0.352347		6.96912e-06	0.000456893	0.352575	0.0465906
						0.0758337	0	3.10026	0.322553	0.326176		9.35379e-06	0.00045683	0.326405	0.0625416													-0.272351	0.401954	3.05567	0.327261	0.369071		3.85738e-07	0.000456948	0.3693	0.00257846		-0.0350899	0.211876	3.08169	0.324497	0.352804		7.00365e-06	0.000456881	0.353032	0.0468227
						0.0753769	0	3.10017	0.322563	0.326633		9.08829e-06	0.00045683	0.326862	0.0607664													-0.272808	0.401965	3.05566	0.327261	0.369528		3.82651e-07	0.000456909	0.369757	0.00255805		-0.0355468	0.211869	3.08162	0.324504	0.353261		7.00559e-06	0.00045687	0.353489	0.0468368
						0.0749201	0	3.10008	0.322572	0.32709		9.08829e-06	0.00045683	0.327318	0.0607664													-0.273265	0.401973	3.05566	0.327262	0.369985		3.80109e-07	0.000456882	0.370213	0.0025412		-0.0360036	0.211863	3.08156	0.324511	0.353718		6.87721e-06	0.00045686	0.353946	0.0459795
						0.0744632	0	3.1	0.322581	0.327547		9.08829e-06	0.00045683	0.327775	0.0607664													-0.273722	0.40198	3.05566	0.327262	0.370442		3.78019e-07	0.000456865	0.37067	0.00252733		-0.0364604	0.211857	3.08149	0.324518	0.354174		6.87719e-06	0.000456852	0.354403	0.0459802
						0.0740064	0	3.09991	0.32259	0.328004		9.08829e-06	0.00045683	0.328232	0.0607664													-0.274179	0.401986	3.05565	0.327262	0.370899		3.76303e-07	0.000456853	0.371127	0.00251592		-0.0369173	0.211853	3.08143	0.324525	0.354631		6.87717e-06	0.000456845	0.35486	0.0459808
						0.0735496	0	3.09982	0.322599	0.32846		9.08829e-06	0.00045683	0.328689	0.0607664													-0.274635	0.40199	3.05565	0.327263	0.371356		3.74895e-07	0.000456845	0.371584	0.00250655		-0.0373741	0.211849	3.08136	0.324532	0.355088		6.87715e-06	0.000456839	0.355317	0.0459812
						0.0730927	0	3.09974	0.322608	0.328917		9.08829e-06	0.00045683	0.329146	0.0607664													-0.275092	0.401994	3.05565	0.327263	0.371812		3.73742e-07	0.00045684	0.372041	0.00249887		-0.0378309	0.211846	3.0813	0.324539	0.355545		6.87713e-06	0.000456835	0.355773	0.0459816
						0.0726359	0	3.09965	0.322617	0.329374		9.08829e-06	0.00045683	0.329603	0.0607664													-0.275549	0.401997	3.05564	0.327263	0.372269		3.72799e-07	0.000456836	0.372498	0.00249258		-0.0382878	0.211844	3.08123	0.324546	0.356002		6.87711e-06	0.000456832	0.35623	0.0459817
						0.0721791	0	3.09956	0.322626	0.329831		9.08829e-06	0.00045683	0.330059	0.0607664													-0.276006	0.402	3.05564	0.327264	0.372726		3.65557e-07	0.000456834	0.372955	0.00244417		-0.0387446	0.211843	3.08117	0.324553	0.356459		6.87709e-06	0.00045683	0.356687	0.0459818
						0.0717222	0	3.09947	0.322635	0.330288		9.08829e-06	0.00045683	0.330516	0.0607664													-0.276463	0.402002	3.05564	0.327264	0.373183		3.29682e-07	0.000456833	0.373411	0.00220431		-0.0392014	0.211842	3.0811	0.324559	0.356915		6.87707e-06	0.00045683	0.357144	0.0459817
						0.0712654	0	3.09939	0.322645	0.330745		9.08829e-06	0.00045683	0.330973	0.0607664													-0.27692	0.402003	3.05563	0.327265	0.37364		3.29199e-07	0.000456832	0.373868	0.00220109		-0.0396582	0.211842	3.08103	0.324566	0.357372		6.87705e-06	0.000456831	0.357601	0.0459814
						0.0708086	0	3.0993	0.322654	0.331201		9.08829e-06	0.00045683	0.33143	0.0607664													-0.277376	0.402005	3.05563	0.327265	0.374097		3.28808e-07	0.000456831	0.374325	0.00219848		-0.0401151	0.211843	3.08097	0.324573	0.357829		6.90659e-06	0.000456833	0.358058	0.0461787
						0.0703518	0	3.09921	0.322663	0.331658		8.83333e-06	0.00045683	0.331887	0.0590616													-0.277833	0.402006	3.05563	0.327265	0.374553		3.28491e-07	0.00045683	0.374782	0.00219636		-0.0405719	0.211845	3.0809	0.32458	0.358286		6.90311e-06	0.000456837	0.358514	0.046155
						0.0698949	0	3.09913	0.322672	0.332115		8.83333e-06	0.00045683	0.332344	0.0590616													-0.27829	0.402007	3.05562	0.327265	0.37501		3.28234e-07	0.00045683	0.375239	0.00219465		-0.0410287	0.211848	3.08084	0.324587	0.358743		6.7808e-06	0.000456842	0.358971	0.0453367
						0.0694381	0	3.09904	0.32268	0.332572		8.83333e-06	0.00045683	0.3328	0.0590616													-0.278747	0.402007	3.05562	0.327266	0.375467		3.28027e-07	0.00045683	0.375695	0.00219326		-0.0414856	0.211851	3.08077	0.324594	0.3592		6.78101e-06	0.000456849	0.359428	0.0453375
						0.0689813	0	3.09896	0.322689	0.333029		8.83333e-06	0.00045683	0.333257	0.0590616													-0.279204	0.402008	3.05562	0.327266	0.375924		3.2786e-07	0.00045683	0.376152	0.00219214		-0.0419424	0.211855	3.08071	0.324601	0.359656		6.78122e-06	0.000456856	0.359885	0.0453381
						0.0685244	0	3.09887	0.322698	0.333486		8.83333e-06	0.00045683	0.333714	0.0590616													-0.27966	0.402008	3.05561	0.327266	0.376381		3.27725e-07	0.00045683	0.376609	0.00219124		-0.0423992	0.21186	3.08065	0.324607	0.360113		6.78144e-06	0.000456866	0.360342	0.0453386
						0.0680676	0	3.09879	0.322707	0.333942		8.83333e-06	0.00045683	0.334171	0.0590616													-0.280117	0.402009	3.05561	0.327267	0.376838		3.27616e-07	0.00045683	0.377066	0.00219052		-0.042856	0.211866	3.08058	0.324614	0.36057		6.78165e-06	0.000456877	0.360799	0.045339
						0.0676108	0	3.0987	0.322716	0.334399		8.83333e-06	0.00045683	0.334628	0.0590616													-0.280574	0.402009	3.05561	0.327267	0.377294		3.27529e-07	0.00045683	0.377523	0.00218993		-0.0433129	0.211873	3.08052	0.324621	0.361027		6.78186e-06	0.000456889	0.361256	0.0453392
						0.067154	0	3.09862	0.322725	0.334856		8.83333e-06	0.00045683	0.335085	0.0590616													-0.281031	0.402009	3.0556	0.327267	0.377751		3.21393e-07	0.00045683	0.37798	0.00214891		-0.0437697	0.21188	3.08045	0.324628	0.361484		6.78208e-06	0.000456902	0.361712	0.0453393
						0.0666971	0	3.09853	0.322733	0.335313		8.83333e-06	0.00045683	0.335541	0.0590616													-0.281488	0.402009	3.0556	0.327268	0.378208		2.92681e-07	0.00045683	0.378436	0.00195693		-0.0442265	0.211888	3.08039	0.324634	0.361941		6.78229e-06	0.000456917	0.362169	0.0453392
						0.0662403	0	3.09845	0.322742	0.33577		8.83333e-06	0.00045683	0.335998	0.0590616													-0.281945	0.40201	3.0556	0.327268	0.378665		2.92639e-07	0.00045683	0.378893	0.00195665		-0.0446834	0.211897	3.08032	0.324641	0.362398		6.78251e-06	0.000456934	0.362626	0.045339
						0.0657835	0	3.09836	0.322751	0.336227		8.83333e-06	0.00045683	0.336455	0.0590616													-0.282401	0.40201	3.0556	0.327268	0.379122		2.92605e-07	0.00045683	0.37935	0.00195642		-0.0451402	0.211907	3.08026	0.324648	0.362855		6.80676e-06	0.000456952	0.363083	0.0454994
						0.0653266	0	3.09828	0.32276	0.336683		8.58811e-06	0.00045683	0.336912	0.0574221													-0.282858	0.40201	3.05559	0.327269	0.379579		2.92578e-07	0.00045683	0.379807	0.00195624		-0.045597	0.211917	3.08019	0.324655	0.363312		6.81255e-06	0.000456971	0.36354	0.0455361
						0.0648698	0	3.0982	0.322768	0.33714		8.58811e-06	0.00045683	0.337369	0.0574221													-0.283315	0.40201	3.05559	0.327269	0.380035		2.92556e-07	0.00045683	0.380264	0.0019561		-0.0460539	0.211929	3.08013	0.324662	0.363769		6.69571e-06	0.000456992	0.363997	0.0447532
						0.064413	0	3.09811	0.322777	0.337597		8.58811e-06	0.00045683	0.337825	0.0574221													-0.283772	0.40201	3.05559	0.327269	0.380492		2.92539e-07	0.00045683	0.380721	0.00195598		-0.0465107	0.211941	3.08007	0.324668	0.364226		6.68278e-06	0.000457014	0.364454	0.0446646
						0.0639561	0	3.09803	0.322786	0.338054		8.58811e-06	0.00045683	0.338282	0.0574221													-0.284229	0.40201	3.05559	0.32727	0.380949		2.92525e-07	0.00045683	0.381177	0.00195589		-0.0469675	0.211954	3.08	0.324675	0.364683		6.68324e-06	0.000457038	0.364911	0.0446653
						0.0634993	0	3.09795	0.322794	0.338511		8.58811e-06	0.00045683	0.338739	0.0574221													-0.284686	0.40201	3.05558	0.32727	0.381406		2.92515e-07	0.00045683	0.381634	0.00195582		-0.0474243	0.211968	3.07994	0.324682	0.36514		6.68369e-06	0.000457063	0.365368	0.0446659
						0.0630425	0	3.09787	0.322803	0.338968		8.58811e-06	0.00045683	0.339196	0.0574221													-0.285142	0.40201	3.05558	0.32727	0.381863		2.92506e-07	0.00045683	0.382091	0.00195576		-0.0478812	0.211982	3.07988	0.324688	0.365597		6.68415e-06	0.00045709	0.365825	0.0446663
						0.0625857	0	3.09778	0.322811	0.339424		8.58811e-06	0.00045683	0.339653	0.0574221													-0.285599	0.40201	3.05558	0.32727	0.38232		2.92499e-07	0.00045683	0.382548	0.00195572		-0.048338	0.211998	3.07981	0.324695	0.366054		6.68461e-06	0.000457118	0.366282	0.0446666
						0.0621288	0	3.0977	0.32282	0.339881		8.58811e-06	0.00045683	0.34011	0.0574221													-0.286056	0.40201	3.05557	0.327271	0.382776		2.87424e-07	0.00045683	0.383005	0.00192178		-0.0487948	0.212014	3.07975	0.324702	0.366511		6.68506e-06	0.000457148	0.36674	0.0446667
						0.061672	0	3.09762	0.322829	0.340338		8.58811e-06	0.00045683	0.340566	0.0574221													-0.286513	0.40201	3.05557	0.327271	0.383233		2.63784e-07	0.00045683	0.383462	0.00176372		-0.0492517	0.212031	3.07969	0.324708	0.366968		6.68552e-06	0.000457179	0.367197	0.0446668
						0.0612152	0	3.09754	0.322837	0.340795		8.58811e-06	0.00045683	0.341023	0.0574221													-0.28697	0.40201	3.05557	0.327271	0.38369		2.63781e-07	0.00045683	0.383918	0.0017637		-0.0497085	0.212049	3.07962	0.324715	0.367425		6.68598e-06	0.000457212	0.367654	0.0446666
						0.0607583	0	3.09745	0.322846	0.341252		8.58811e-06	0.00045683	0.34148	0.0574221													-0.287427	0.40201	3.05557	0.327272	0.384147		2.63779e-07	0.00045683	0.384375	0.00176368		-0.0501653	0.212067	3.07956	0.324722	0.367883		6.70473e-06	0.000457246	0.368111	0.0447885
						0.0603015	0	3.09737	0.322854	0.341709		8.35192e-06	0.00045683	0.341937	0.0558428													-0.287883	0.40201	3.05556	0.327272	0.384604		2.63777e-07	0.00045683	0.384832	0.00176367		-0.0506222	0.212087	3.0795	0.324728	0.36834		6.70943e-06	0.000457282	0.368568	0.0448164
						0.0598447	0	3.09729	0.322863	0.342165		8.35192e-06	0.00045683	0.342394	0.0558428													-0.28834	0.40201	3.05556	0.327272	0.385061		2.63775e-07	0.00045683	0.385289	0.00176366		-0.051079	0.212107	3.07943	0.324735	0.368797		6.64799e-06	0.000457319	0.369026	0.0444024
						0.0593878	0	3.09721	0.322871	0.342622		8.35192e-06	0.00045683	0.342851	0.0558428													-0.288797	0.40201	3.05556	0.327272	0.385517		2.63774e-07	0.00045683	0.385746	0.00176365		-0.0515358	0.212128	3.07937	0.324742	0.369254		6.58302e-06	0.000457358	0.369483	0.0439647
						0.058931	0	3.09713	0.322879	0.343079		8.35192e-06	0.00045683	0.343307	0.0558428													-0.289254	0.40201	3.05556	0.327273	0.385974		2.63773e-07	0.00045683	0.386203	0.00176365		-0.0519926	0.21215	3.07931	0.324748	0.369712		6.58372e-06	0.000457399	0.36994	0.0439655
						0.0584742	0	3.09705	0.322888	0.343536		8.35192e-06	0.00045683	0.343764	0.0558428													-0.289711	0.40201	3.05555	0.327273	0.386431		2.63772e-07	0.00045683	0.386659	0.00176364		-0.0524495	0.212173	3.07924	0.324755	0.370169		6.58443e-06	0.000457441	0.370398	0.0439662
						0.0580174	0	3.09697	0.322896	0.343993		8.35192e-06	0.00045683	0.344221	0.0558428													-0.290168	0.40201	3.05555	0.327273	0.386888		2.63772e-07	0.00045683	0.387116	0.00176364		-0.0529063	0.212197	3.07918	0.324762	0.370627		6.58514e-06	0.000457484	0.370855	0.0439667
						0.0575605	0	3.09689	0.322904	0.34445		8.35192e-06	0.00045683	0.344678	0.0558428													-0.290624	0.40201	3.05555	0.327273	0.387345		2.63771e-07	0.00045683	0.387573	0.00176363		-0.0533631	0.212221	3.07912	0.324768	0.371084		6.58585e-06	0.00045753	0.371313	0.0439671
						0.0571037	0	3.09681	0.322913	0.344906		8.35192e-06	0.00045683	0.345135	0.0558428													-0.291081	0.40201	3.05555	0.327274	0.387801		2.59625e-07	0.00045683	0.38803	0.00173591		-0.05382	0.212247	3.07906	0.324775	0.371542		6.58656e-06	0.000457577	0.37177	0.0439673
						0.0566469	0	3.09673	0.322921	0.345363		8.35192e-06	0.00045683	0.345592	0.0558428													-0.291538	0.40201	3.05554	0.327274	0.388258		2.4032e-07	0.00045683	0.388487	0.00160683		-0.0542768	0.212273	3.07899	0.324781	0.371999		6.58727e-06	0.000457625	0.372228	0.0439674
						0.05619	0	3.09665	0.322929	0.34582		8.35192e-06	0.00045683	0.346048	0.0558428													-0.291995	0.40201	3.05554	0.327274	0.388715		2.4032e-07	0.00045683	0.388944	0.00160683		-0.0547336	0.2123	3.07893	0.324788	0.372457		6.58799e-06	0.000457675	0.372686	0.0439674
						0.0557332	0	3.09657	0.322938	0.346277		8.35192e-06	0.00045683	0.346505	0.0558428													-0.292452	0.40201	3.05554	0.327274	0.389172		2.4032e-07	0.00045683	0.3894	0.00160683		-0.0551904	0.212328	3.07887	0.324795	0.372914		6.60107e-06	0.000457727	0.373143	0.0440497
						0.0552764	0	3.09649	0.322946	0.346734		8.12407e-06	0.00045683	0.346962	0.0543193													-0.292909	0.40201	3.05554	0.327275	0.389629		2.4032e-07	0.00045683	0.389857	0.00160683		-0.0556473	0.212356	3.07881	0.324801	0.373372		6.60464e-06	0.00045778	0.373601	0.0440684
						0.0548196	0	3.09641	0.322954	0.34719		8.12407e-06	0.00045683	0.347419	0.0543193													-0.293365	0.40201	3.05554	0.327275	0.390086		2.40319e-07	0.00045683	0.390314	0.00160683		-0.0561041	0.212386	3.07874	0.324808	0.37383		6.60536e-06	0.000457835	0.374059	0.0440679
						0.0543627	0	3.09634	0.322962	0.347647		8.12407e-06	0.00045683	0.347876	0.0543193													-0.293822	0.40201	3.05553	0.327275	0.390542		2.40319e-07	0.00045683	0.390771	0.00160683		-0.0565609	0.212416	3.07868	0.324814	0.374288		6.5044e-06	0.000457892	0.374517	0.043389
						0.0539059	0	3.09626	0.322971	0.348104		8.12407e-06	0.00045683	0.348333	0.0543193													-0.294279	0.40201	3.05553	0.327275	0.390999		2.40319e-07	0.00045683	0.391228	0.00160683		-0.0570178	0.212447	3.07862	0.324821	0.374746		6.48319e-06	0.00045795	0.374975	0.043242
						0.0534491	0	3.09618	0.322979	0.348561		8.12407e-06	0.00045683	0.348789	0.0543193													-0.294736	0.40201	3.05553	0.327276	0.391456		2.40319e-07	0.00045683	0.391685	0.00160683		-0.0574746	0.212479	3.07856	0.324827	0.375204		6.48416e-06	0.00045801	0.375433	0.0432428
						0.0529922	0	3.0961	0.322987	0.349018		8.12407e-06	0.00045683	0.349246	0.0543193													-0.295193	0.40201	3.05553	0.327276	0.391913		2.40319e-07	0.00045683	0.392141	0.00160683		-0.0579314	0.212512	3.0785	0.324834	0.375662		6.48513e-06	0.000458072	0.375891	0.0432435
						0.0525354	0	3.09602	0.322995	0.349475		8.12407e-06	0.00045683	0.349703	0.0543193													-0.29565	0.40201	3.05552	0.327276	0.39237		2.40319e-07	0.00045683	0.392598	0.00160683		-0.0583883	0.212546	3.07844	0.32484	0.37612		6.4861e-06	0.000458135	0.376349	0.043244
						0.0520786	0	3.09595	0.323003	0.349931		8.12407e-06	0.00045683	0.35016	0.0543193													-0.296106	0.40201	3.05552	0.327276	0.392827		2.36984e-07	0.00045683	0.393055	0.00158453		-0.0588451	0.21258	3.07837	0.324847	0.376578		6.48708e-06	0.0004582	0.376807	0.0432443
						0.0516217	0	3.09587	0.323011	0.350388		8.12407e-06	0.00045683	0.350617	0.0543193													-0.296563	0.40201	3.05552	0.327277	0.393283		2.21453e-07	0.00045683	0.393512	0.00148068		-0.0593019	0.212616	3.07831	0.324853	0.377036		6.48806e-06	0.000458267	0.377265	0.0432445
						0.0511649	0	3.09579	0.323019	0.350845		8.12407e-06	0.00045683	0.351074	0.0543193													-0.29702	0.40201	3.05552	0.327277	0.39374		2.21453e-07	0.00045683	0.393969	0.00148068		-0.0597587	0.212652	3.07825	0.32486	0.377494		6.48904e-06	0.000458336	0.377723	0.0432446
						0.0507081	0	3.09571	0.323027	0.351302		8.12407e-06	0.00045683	0.35153	0.0543193													-0.297477	0.40201	3.05552	0.327277	0.394197		2.21453e-07	0.00045683	0.394426	0.00148068		-0.0602156	0.212689	3.07819	0.324866	0.377953		6.49634e-06	0.000458406	0.378182	0.0432866
						0.0502513	0	3.09563	0.323036	0.351759		7.90394e-06	0.00045683	0.351987	0.0528475													-0.297934	0.40201	3.05551	0.327277	0.394654		2.21453e-07	0.00045683	0.394882	0.00148068		-0.0606724	0.212727	3.07813	0.324873	0.378411		6.49878e-06	0.000458478	0.37864	0.0432961
						0.0497944	0	3.09556	0.323043	0.352216		7.90394e-06	0.00045683	0.352444	0.0528475													-0.29839	0.40201	3.05551	0.327277	0.395111		2.21453e-07	0.00045683	0.395339	0.00148068		-0.0611292	0.212766	3.07807	0.324879	0.37887		6.49977e-06	0.000458551	0.379099	0.0432957
						0.0493376	0	3.09548	0.323051	0.352672		7.90394e-06	0.00045683	0.352901	0.0528475													-0.298847	0.40201	3.05551	0.327278	0.395568		2.21453e-07	0.00045683	0.395796	0.00148068		-0.0615861	0.212806	3.07801	0.324886	0.379328		6.50075e-06	0.000458627	0.379557	0.0432952
						0.0488808	0	3.09541	0.323059	0.353129		7.90394e-06	0.00045683	0.353358	0.0528475													-0.299304	0.40201	3.05551	0.327278	0.396024		2.21453e-07	0.00045683	0.396253	0.00148068		-0.0620429	0.212846	3.07794	0.324892	0.379787		6.39642e-06	0.000458704	0.380016	0.0425932
						0.0484239	0	3.09533	0.323067	0.353586		7.90394e-06	0.00045683	0.353815	0.0528475													-0.299761	0.40201	3.05551	0.327278	0.396481		2.21453e-07	0.00045683	0.39671	0.00148068		-0.0624997	0.212888	3.07788	0.324899	0.380245		6.38339e-06	0.000458783	0.380475	0.0424991
						0.0479671	0	3.09526	0.323075	0.354043		7.90394e-06	0.00045683	0.354271	0.0528475													-0.300218	0.40201	3.0555	0.327278	0.396938		2.21453e-07	0.00045683	0.397166	0.00148068		-0.0629565	0.21293	3.07782	0.324905	0.380704		6.38463e-06	0.000458863	0.380934	0.0424999
						0.0475103	0	3.09518	0.323083	0.3545		7.90394e-06	0.00045683	0.354728	0.0528475													-0.300675	0.40201	3.0555	0.327279	0.397395		2.21453e-07	0.00045683	0.397623	0.00148068		-0.0634134	0.212973	3.07776	0.324911	0.381163		6.38588e-06	0.000458946	0.381393	0.0425005
						0.0470534	0	3.0951	0.323091	0.354957		7.90394e-06	0.00045683	0.355185	0.0528475													-0.301131	0.40201	3.0555	0.327279	0.397852		2.18821e-07	0.00045683	0.39808	0.00146309		-0.0638702	0.213017	3.0777	0.324918	0.381622		6.38712e-06	0.00045903	0.381852	0.042501
						0.0465966	0	3.09503	0.323099	0.355413		7.90394e-06	0.00045683	0.355642	0.0528475													-0.301588	0.40201	3.0555	0.327279	0.398309		2.0657e-07	0.00045683	0.398537	0.00138117		-0.064327	0.213062	3.07764	0.324924	0.382081		6.38838e-06	0.000459117	0.382311	0.0425013
						0.0461398	0	3.09495	0.323107	0.35587		7.90394e-06	0.00045683	0.356099	0.0528475													-0.302045	0.40201	3.0555	0.327279	0.398765		2.0657e-07	0.00045683	0.398994	0.00138117		-0.0647839	0.213108	3.07758	0.324931	0.38254		6.38963e-06	0.000459205	0.38277	0.0425015
						0.045683	0	3.09488	0.323115	0.356327		7.90394e-06	0.00045683	0.356556	0.0528475													-0.302502	0.40201	3.05549	0.327279	0.399222		2.0657e-07	0.00045683	0.399451	0.00138117		-0.0652407	0.213154	3.07752	0.324937	0.382999		6.39112e-06	0.000459295	0.383229	0.0425031
						0.0452261	0	3.0948	0.323123	0.356784		7.69096e-06	0.00045683	0.357012	0.0514235													-0.302959	0.40201	3.05549	0.32728	0.399679		2.0657e-07	0.00045683	0.399907	0.00138117		-0.0656975	0.213202	3.07746	0.324943	0.383459		6.39243e-06	0.000459387	0.383688	0.0425033
						0.0447693	0	3.09473	0.32313	0.357241		7.69096e-06	0.00045683	0.357469	0.0514235													-0.303416	0.40201	3.05549	0.32728	0.400136		2.0657e-07	0.00045683	0.400364	0.00138117		-0.0661544	0.21325	3.0774	0.32495	0.383918		6.39368e-06	0.00045948	0.384148	0.042503
						0.0443125	0	3.09465	0.323138	0.357698		7.69096e-06	0.00045683	0.357926	0.0514235													-0.303872	0.40201	3.05549	0.32728	0.400593		2.0657e-07	0.00045683	0.400821	0.00138117		-0.0666112	0.2133	3.07734	0.324956	0.384378		6.39494e-06	0.000459575	0.384607	0.0425026
						0.0438556	0	3.09458	0.323146	0.358154		7.69096e-06	0.00045683	0.358383	0.0514235													-0.304329	0.40201	3.05549	0.32728	0.40105		2.0657e-07	0.00045683	0.401278	0.00138117		-0.067068	0.21335	3.07728	0.324963	0.384837		6.3962e-06	0.000459672	0.385067	0.042502
						0.0433988	0	3.09451	0.323153	0.358611		7.69096e-06	0.00045683	0.35884	0.0514235													-0.304786	0.40201	3.05548	0.32728	0.401506		2.0657e-07	0.00045683	0.401735	0.00138117		-0.0675248	0.213401	3.07722	0.324969	0.385297		6.32442e-06	0.000459771	0.385527	0.042016
						0.042942	0	3.09443	0.323161	0.359068		7.69096e-06	0.00045683	0.359296	0.0514235													-0.305243	0.40201	3.05548	0.327281	0.401963		2.0657e-07	0.00045683	0.402192	0.00138117		-0.0679817	0.213453	3.07716	0.324975	0.385757		6.28415e-06	0.000459872	0.385986	0.0417392
						0.0424852	0	3.09436	0.323169	0.359525		7.69096e-06	0.00045683	0.359753	0.0514235													-0.3057	0.40201	3.05548	0.327281	0.40242		2.0657e-07	0.00045683	0.402648	0.00138117		-0.0684385	0.213506	3.0771	0.324982	0.386216		6.28567e-06	0.000459975	0.386446	0.04174
						0.0420283	0	3.09429	0.323176	0.359982		7.69096e-06	0.00045683	0.36021	0.0514235													-0.306157	0.40201	3.05548	0.327281	0.402877		2.04547e-07	0.00045683	0.403105	0.00136765		-0.0688953	0.213559	3.07704	0.324988	0.386676		6.28721e-06	0.00046008	0.386906	0.0417407
						0.0415715	0	3.09421	0.323184	0.360439		7.69096e-06	0.00045683	0.360667	0.0514235													-0.306613	0.40201	3.05548	0.327281	0.403334		1.95131e-07	0.00045683	0.403562	0.00130469		-0.0693522	0.213614	3.07698	0.324994	0.387136		6.28874e-06	0.000460187	0.387367	0.0417412
						0.0411147	0	3.09414	0.323192	0.360895		7.69096e-06	0.00045683	0.361124	0.0514235													-0.30707	0.40201	3.05547	0.327281	0.403791		1.95131e-07	0.00045683	0.404019	0.00130469		-0.069809	0.213669	3.07692	0.325	0.387597		6.29029e-06	0.000460297	0.387827	0.0417415
						0.0406578	0	3.09406	0.323199	0.361352		7.69096e-06	0.00045683	0.361581	0.0514235													-0.307527	0.40201	3.05547	0.327282	0.404247		1.95131e-07	0.00045683	0.404476	0.00130469		-0.0702658	0.213726	3.07686	0.325007	0.388057		6.28597e-06	0.000460408	0.388287	0.0417028
						0.040201	0	3.09399	0.323207	0.361809		7.48459e-06	0.00045683	0.362037	0.0500436													-0.307984	0.40201	3.05547	0.327282	0.404704		1.95131e-07	0.00045683	0.404933	0.00130469		-0.0707227	0.213783	3.0768	0.325013	0.388517		6.28615e-06	0.00046052	0.388748	0.0416938
						0.0397442	0	3.09392	0.323215	0.362266		7.48459e-06	0.00045683	0.362494	0.0500436													-0.308441	0.40201	3.05547	0.327282	0.405161		1.95131e-07	0.00045683	0.405389	0.00130469		-0.0711795	0.213841	3.07674	0.325019	0.388978		6.28769e-06	0.000460634	0.389208	0.0416936
						0.0392873	0	3.09385	0.323222	0.362723		7.48459e-06	0.00045683	0.362951	0.0500436													-0.308898	0.40201	3.05547	0.327282	0.405618		1.95131e-07	0.00045683	0.405846	0.00130469		-0.0716363	0.2139	3.07668	0.325026	0.389439		6.28923e-06	0.00046075	0.389669	0.0416934
						0.0388305	0	3.09378	0.32323	0.36318		7.48459e-06	0.00045683	0.363408	0.0500436													-0.309354	0.40201	3.05547	0.327282	0.406075		1.95131e-07	0.00045683	0.406303	0.00130469		-0.0720931	0.21396	3.07662	0.325032	0.389899		6.29078e-06	0.000460869	0.39013	0.0416929
						0.0383737	0	3.0937	0.323237	0.363636		7.48459e-06	0.00045683	0.363865	0.0500436													-0.309811	0.40201	3.05546	0.327283	0.406531		1.95131e-07	0.00045683	0.40676	0.00130469		-0.07255	0.214021	3.07656	0.325038	0.39036		6.29233e-06	0.000460989	0.390591	0.0416923
						0.0379169	0	3.09363	0.323245	0.364093		7.48459e-06	0.00045683	0.364322	0.0500436													-0.310268	0.40201	3.05546	0.327283	0.406988		1.95131e-07	0.00045683	0.407217	0.00130469		-0.0730068	0.214083	3.0765	0.325044	0.390821		6.28791e-06	0.000461112	0.391052	0.0416519
						0.03746	0	3.09356	0.323252	0.36455		7.48459e-06	0.00045683	0.364778	0.0500436													-0.310725	0.40201	3.05546	0.327283	0.407445		1.95131e-07	0.00045683	0.407674	0.00130469		-0.0734636	0.214146	3.07644	0.325051	0.391282		6.186e-06	0.000461237	0.391513	0.0409658
						0.0370032	0	3.09349	0.32326	0.365007		7.48459e-06	0.00045683	0.365235	0.0500436													-0.311182	0.40201	3.05546	0.327283	0.407902		1.93632e-07	0.00045683	0.40813	0.00129467		-0.0739205	0.214209	3.07638	0.325057	0.391743		6.18782e-06	0.000461364	0.391974	0.0409666
						0.0365464	0	3.09342	0.323267	0.365464		7.48459e-06	0.00045683	0.365692	0.0500436													-0.311639	0.40201	3.05546	0.327283	0.408359		1.86651e-07	0.00045683	0.408587	0.00124799		-0.0743773	0.214274	3.07633	0.325063	0.392205		6.18966e-06	0.000461493	0.392436	0.0409672
						0.0360895	0	3.09335	0.323274	0.365921		7.48459e-06	0.00045683	0.366149	0.0500436													-0.312095	0.40201	3.05545	0.327284	0.408816		1.86651e-07	0.00045683	0.409044	0.00124799		-0.0748341	0.214339	3.07627	0.325069	0.392666		6.19149e-06	0.000461625	0.392897	0.0409677
						0.0356327	0	3.09328	0.323282	0.366377		7.48459e-06	0.00045683	0.366606	0.0500436													-0.312552	0.40201	3.05545	0.327284	0.409272		1.86651e-07	0.00045683	0.409501	0.00124799		-0.0752909	0.214406	3.07621	0.325075	0.393128		6.18145e-06	0.000461759	0.393359	0.0408894
						0.0351759	0	3.0932	0.323289	0.366834		7.28432e-06	0.00045683	0.367063	0.0487046													-0.313009	0.40201	3.05545	0.327284	0.409729		1.86651e-07	0.00045683	0.409958	0.00124799		-0.0757478	0.214473	3.07615	0.325082	0.39359		6.18052e-06	0.000461893	0.393821	0.0408713
						0.034719	0	3.09313	0.323297	0.367291		7.28432e-06	0.00045683	0.367519	0.0487046													-0.313466	0.40201	3.05545	0.327284	0.410186		1.86651e-07	0.00045683	0.410415	0.00124799		-0.0762046	0.214541	3.07609	0.325088	0.394052		6.18234e-06	0.000462029	0.394283	0.0408714
						0.0342622	0	3.09306	0.323304	0.367748		7.28432e-06	0.00045683	0.367976	0.0487046													-0.313923	0.40201	3.05545	0.327284	0.410643		1.86651e-07	0.00045683	0.410871	0.00124799		-0.0766614	0.21461	3.07603	0.325094	0.394514		6.18418e-06	0.000462168	0.394745	0.0408712
						0.0338054	0	3.09299	0.323311	0.368205		7.28432e-06	0.00045683	0.368433	0.0487046													-0.31438	0.40201	3.05545	0.327285	0.4111		1.86651e-07	0.00045683	0.411328	0.00124799		-0.0771183	0.21468	3.07597	0.3251	0.394976		6.18602e-06	0.000462308	0.395207	0.040871
						0.0333486	0	3.09292	0.323319	0.368661		7.28432e-06	0.00045683	0.36889	0.0487046													-0.314836	0.40201	3.05544	0.327285	0.411557		1.86651e-07	0.00045683	0.411785	0.00124799		-0.0775751	0.214751	3.07592	0.325106	0.395438		6.18787e-06	0.000462452	0.395669	0.0408705
						0.0328917	0	3.09285	0.323326	0.369118		7.28432e-06	0.00045683	0.369347	0.0487046													-0.315293	0.40201	3.05544	0.327285	0.412013		1.86651e-07	0.00045683	0.412242	0.00124799		-0.0780319	0.214823	3.07586	0.325113	0.395901		6.18973e-06	0.000462597	0.396132	0.0408699
						0.0324349	0	3.09279	0.323333	0.369575		7.28432e-06	0.00045683	0.369804	0.0487046													-0.31575	0.40201	3.05544	0.327285	0.41247		1.86651e-07	0.00045683	0.412699	0.00124799		-0.0784888	0.214896	3.0758	0.325119	0.396363		6.19159e-06	0.000462745	0.396595	0.0408691
						0.0319781	0	3.09272	0.32334	0.370032		7.28432e-06	0.00045683	0.37026	0.0487046													-0.316207	0.40201	3.05544	0.327285	0.412927		1.85597e-07	0.00045683	0.413156	0.00124095		-0.0789456	0.21497	3.07574	0.325125	0.396826		6.18354e-06	0.000462896	0.397057	0.0408028
						0.0315212	0	3.09265	0.323348	0.370489		7.28432e-06	0.00045683	0.370717	0.0487046													-0.316664	0.40201	3.05544	0.327285	0.413384		1.80691e-07	0.00045683	0.413612	0.00120814		-0.0794024	0.215044	3.07568	0.325131	0.397289		6.09161e-06	0.000463049	0.39752	0.0401828
						0.0310644	0	3.09258	0.323355	0.370946		7.28432e-06	0.00045683	0.371174	0.0487046													-0.317121	0.40201	3.05544	0.327286	0.413841		1.80691e-07	0.00045683	0.414069	0.00120814		-0.0798592	0.21512	3.07562	0.325137	0.397752		6.09375e-06	0.000463204	0.397983	0.0401835
						0.0306076	0	3.09251	0.323362	0.371402		7.28432e-06	0.00045683	0.371631	0.0487046													-0.317577	0.40201	3.05543	0.327286	0.414298		1.80691e-07	0.00045683	0.414526	0.00120814		-0.0803161	0.215197	3.07557	0.325143	0.398215		6.07809e-06	0.000463362	0.398447	0.0400666
						0.0301508	0	3.09244	0.32337	0.371859		7.0897e-06	0.00045683	0.372088	0.0474034													-0.318034	0.40201	3.05543	0.327286	0.414754		1.80691e-07	0.00045683	0.414983	0.00120814		-0.0807729	0.215274	3.07551	0.325149	0.398678		6.07609e-06	0.00046352	0.39891	0.0400397
						0.0296939	0	3.09237	0.323377	0.372316		7.0897e-06	0.00045683	0.372545	0.0474034													-0.318491	0.40201	3.05543	0.327286	0.415211		1.80691e-07	0.00045683	0.41544	0.00120814		-0.0812297	0.215353	3.07545	0.325155	0.399142		6.07821e-06	0.00046368	0.399374	0.0400399
						0.0292371	0	3.0923	0.323384	0.372773		7.0897e-06	0.00045683	0.373001	0.0474034													-0.318948	0.40201	3.05543	0.327286	0.415668		1.80691e-07	0.00045683	0.415897	0.00120814		-0.0816866	0.215432	3.07539	0.325162	0.399606		6.08035e-06	0.000463842	0.399838	0.04004
						0.0287803	0	3.09223	0.323391	0.37323		7.0897e-06	0.00045683	0.373458	0.0474034													-0.319405	0.40201	3.05543	0.327287	0.416125		1.80691e-07	0.00045683	0.416353	0.00120814		-0.0821434	0.215512	3.07534	0.325168	0.400069		6.08249e-06	0.000464007	0.400301	0.0400399
						0.0283234	0	3.09217	0.323398	0.373687		7.0897e-06	0.00045683	0.373915	0.0474034													-0.319861	0.40201	3.05543	0.327287	0.416582		1.80691e-07	0.00045683	0.41681	0.00120814		-0.0826002	0.215594	3.07528	0.325174	0.400533		6.08465e-06	0.000464174	0.400766	0.0400396
						0.0278666	0	3.0921	0.323405	0.374143		7.0897e-06	0.00045683	0.374372	0.0474034													-0.320318	0.40201	3.05542	0.327287	0.417039		1.80691e-07	0.00045683	0.417267	0.00120814		-0.0830571	0.215676	3.07522	0.32518	0.400998		6.08681e-06	0.000464344	0.40123	0.0400392
						0.0274098	0	3.09203	0.323412	0.3746		7.0897e-06	0.00045683	0.374829	0.0474034													-0.320775	0.40201	3.05542	0.327287	0.417495		1.80691e-07	0.00045683	0.417724	0.00120814		-0.0835139	0.215759	3.07516	0.325186	0.401462		6.08898e-06	0.000464517	0.401694	0.0400386
						0.0269529	0	3.09196	0.323419	0.375057		7.0897e-06	0.00045683	0.375286	0.0474034													-0.321232	0.40201	3.05542	0.327287	0.417952		1.80013e-07	0.00045683	0.418181	0.00120361		-0.0839707	0.215843	3.07511	0.325192	0.401926		6.09116e-06	0.000464692	0.402159	0.0400378
						0.0264961	0	3.09189	0.323426	0.375514		7.0897e-06	0.00045683	0.375742	0.0474034													-0.321689	0.40201	3.05542	0.327287	0.418409		1.76854e-07	0.00045683	0.418637	0.00118249		-0.0844275	0.215928	3.07505	0.325198	0.402391		6.09335e-06	0.00046487	0.402624	0.0400368
						0.0260393	0	3.09183	0.323433	0.375971		7.0897e-06	0.00045683	0.376199	0.0474034													-0.322146	0.40201	3.05542	0.327288	0.418866		1.76854e-07	0.00045683	0.419094	0.00118249		-0.0848844	0.216014	3.07499	0.325204	0.402856		6.09827e-06	0.000465051	0.403089	0.0400536
						0.0255825	0	3.09176	0.32344	0.376428		7.0897e-06	0.00045683	0.376656	0.0474034													-0.322602	0.40201	3.05542	0.327288	0.419323		1.76854e-07	0.00045683	0.419551	0.00118249		-0.0853412	0.216102	3.07493	0.32521	0.403321		6.0167e-06	0.000465234	0.403554	0.0395022
						0.0251256	0	3.09169	0.323448	0.376884		6.90031e-06	0.00045683	0.377113	0.046137													-0.323059	0.40201	3.05541	0.327288	0.41978		1.76854e-07	0.00045683	0.420008	0.00118249		-0.085798	0.21619	3.07488	0.325216	0.403786		5.98528e-06	0.000465415	0.404019	0.0392807
						0.0246688	0	3.09163	0.323454	0.377341		6.90031e-06	0.00045683	0.37757	0.046137													-0.323516	0.40201	3.05541	0.327288	0.420236		1.76854e-07	0.00045683	0.420465	0.00118249		-0.0862549	0.216279	3.07482	0.325222	0.404252		5.98781e-06	0.000465598	0.404485	0.0392819
						0.024212	0	3.09156	0.323461	0.377798		6.90031e-06	0.00045683	0.378026	0.046137													-0.323973	0.40201	3.05541	0.327288	0.420693		1.76854e-07	0.00045683	0.420922	0.00118249		-0.0867117	0.216368	3.07476	0.325228	0.404717		5.99036e-06	0.000465784	0.40495	0.039283
						0.0237551	0	3.09149	0.323468	0.378255		6.90031e-06	0.00045683	0.378483	0.046137													-0.32443	0.40201	3.05541	0.327288	0.42115		1.76854e-07	0.00045683	0.421378	0.00118249		-0.0871685	0.216459	3.07471	0.325234	0.405183		5.99292e-06	0.000465972	0.405416	0.0392839
						0.0232983	0	3.09143	0.323475	0.378712		6.90031e-06	0.00045683	0.37894	0.046137													-0.324887	0.40201	3.05541	0.327289	0.421607		1.76854e-07	0.00045683	0.421835	0.00118249		-0.0876253	0.216551	3.07465	0.32524	0.405649		5.99549e-06	0.000466163	0.405882	0.0392846
						0.0228415	0	3.09136	0.323482	0.379169		6.90031e-06	0.00045683	0.379397	0.046137													-0.325343	0.40201	3.05541	0.327289	0.422064		1.76854e-07	0.00045683	0.422292	0.00118249		-0.0880822	0.216644	3.07459	0.325246	0.406115		5.99807e-06	0.000466357	0.406348	0.0392852
						0.0223847	0	3.0913	0.323489	0.379625		6.90031e-06	0.00045683	0.379854	0.046137													-0.3258	0.40201	3.0554	0.327289	0.422521		1.76854e-07	0.00045683	0.422749	0.00118249		-0.088539	0.216738	3.07454	0.325252	0.406582		6.00067e-06	0.000466554	0.406815	0.0392856
						0.0219278	0	3.09123	0.323496	0.380082		6.90031e-06	0.00045683	0.380311	0.046137													-0.326257	0.40201	3.0554	0.327289	0.422977		1.76487e-07	0.00045683	0.423206	0.00118004		-0.0889958	0.216833	3.07448	0.325258	0.407048		6.00327e-06	0.000466753	0.407282	0.0392858
						0.021471	0	3.09116	0.323503	0.380539		6.90031e-06	0.00045683	0.380767	0.046137													-0.326714	0.40201	3.0554	0.327289	0.423434		1.7478e-07	0.00045683	0.423663	0.00116862		-0.0894527	0.216928	3.07442	0.325264	0.407515		6.00589e-06	0.000466956	0.407748	0.0392859
						0.0210142	0	3.0911	0.32351	0.380996		6.90031e-06	0.00045683	0.381224	0.046137													-0.327171	0.40201	3.0554	0.32729	0.423891		1.7478e-07	0.00045683	0.424119	0.00116862		-0.0899095	0.217025	3.07437	0.32527	0.407982		6.00852e-06	0.000467161	0.408215	0.0392859
						0.0205573	0	3.09103	0.323517	0.381453		6.90031e-06	0.00045683	0.381681	0.046137													-0.327628	0.40201	3.0554	0.32729	0.424348		1.7478e-07	0.00045683	0.424576	0.00116862		-0.0903663	0.217123	3.07431	0.325276	0.408449		5.98342e-06	0.00046737	0.408683	0.0391043
						0.0201005	0	3.09097	0.323523	0.38191		6.71573e-06	0.00045683	0.382138	0.0449029													-0.328084	0.40201	3.0554	0.32729	0.424805		1.7478e-07	0.00045683	0.425033	0.00116862		-0.0908232	0.217221	3.07425	0.325282	0.408916		5.9796e-06	0.000467577	0.40915	0.039062
						0.0196437	0	3.0909	0.32353	0.382366		6.71573e-06	0.00045683	0.382595	0.0449029													-0.328541	0.40201	3.05539	0.32729	0.425262		1.7478e-07	0.00045683	0.42549	0.00116862		-0.09128	0.217321	3.0742	0.325288	0.409384		5.9822e-06	0.000467786	0.409618	0.0390615
						0.0191868	0	3.09084	0.323537	0.382823		6.71573e-06	0.00045683	0.383052	0.0449029													-0.328998	0.40201	3.05539	0.32729	0.425718		1.7478e-07	0.00045683	0.425947	0.00116862		-0.0917368	0.217422	3.07414	0.325294	0.409852		5.9069e-06	0.000467997	0.410086	0.0385524
						0.01873	0	3.09077	0.323544	0.38328		6.71573e-06	0.00045683	0.383508	0.0449029													-0.329455	0.40201	3.05539	0.32729	0.426175		1.7478e-07	0.00045683	0.426404	0.00116862		-0.0921936	0.217523	3.07408	0.3253	0.41032		5.89495e-06	0.000468212	0.410554	0.0384568
						0.0182732	0	3.09071	0.32355	0.383737		6.71573e-06	0.00045683	0.383965	0.0449029													-0.329912	0.40201	3.05539	0.327291	0.426632		1.7478e-07	0.00045683	0.42686	0.00116862		-0.0926505	0.217626	3.07403	0.325306	0.410788		5.89785e-06	0.00046843	0.411022	0.0384578
						0.0178164	0	3.09065	0.323557	0.384194		6.71573e-06	0.00045683	0.384422	0.0449029													-0.330369	0.40201	3.05539	0.327291	0.427089		1.7478e-07	0.00045683	0.427317	0.00116862		-0.0931073	0.21773	3.07397	0.325312	0.411256		5.90076e-06	0.000468651	0.411491	0.0384586
						0.0173595	0	3.09058	0.323564	0.384651		6.71573e-06	0.00045683	0.384879	0.0449029													-0.330825	0.40201	3.05539	0.327291	0.427546		1.7478e-07	0.00045683	0.427774	0.00116862		-0.0935641	0.217834	3.07392	0.325318	0.411725		5.90369e-06	0.000468875	0.41196	0.0384593
						0.0169027	0	3.09052	0.32357	0.385107		6.71573e-06	0.00045683	0.385336	0.0449029													-0.331282	0.40201	3.05538	0.327291	0.428002		1.74666e-07	0.00045683	0.428231	0.00116786		-0.094021	0.21794	3.07386	0.325324	0.412194		5.90662e-06	0.000469103	0.412429	0.0384598
						0.0164459	0	3.09045	0.323577	0.385564		6.71573e-06	0.00045683	0.385793	0.0449029													-0.331739	0.40201	3.05538	0.327291	0.428459		1.74136e-07	0.00045683	0.428688	0.00116431		-0.0944778	0.218046	3.07381	0.32533	0.412663		5.90958e-06	0.000469333	0.412898	0.0384601
						0.015989	0	3.09039	0.323584	0.386021		6.71573e-06	0.00045683	0.386249	0.0449029													-0.332196	0.40201	3.05538	0.327291	0.428916		1.74136e-07	0.00045683	0.429145	0.00116431		-0.0949346	0.218154	3.07375	0.325336	0.413132		5.91255e-06	0.000469567	0.413367	0.0384603
						0.0155322	0	3.09032	0.323591	0.386478		6.71573e-06	0.00045683	0.386706	0.0449029													-0.332653	0.40201	3.05538	0.327292	0.429373		1.74136e-07	0.00045683	0.429601	0.00116431		-0.0953915	0.218263	3.07369	0.325341	0.413602		5.88191e-06	0.000469804	0.413837	0.0382417
						0.0150754	0	3.09026	0.323597	0.386935		6.53561e-06	0.00045683	0.387163	0.0436986													-0.33311	0.40201	3.05538	0.327292	0.42983		1.74136e-07	0.00045683	0.430058	0.00116431		-0.0958483	0.218372	3.07364	0.325347	0.414072		5.87705e-06	0.000470039	0.414307	0.038191
						0.0146185	0	3.0902	0.323604	0.387392		6.53561e-06	0.00045683	0.38762	0.0436986													-0.333566	0.40201	3.05538	0.327292	0.430287		1.74136e-07	0.00045683	0.430515	0.00116431		-0.0963051	0.218483	3.07358	0.325353	0.414542		5.87998e-06	0.000470275	0.414777	0.0381908
						0.0141617	0	3.09014	0.32361	0.387848		6.53561e-06	0.00045683	0.388077	0.0436986													-0.334023	0.40201	3.05537	0.327292	0.430743		1.74136e-07	0.00045683	0.430972	0.00116431		-0.0967619	0.218595	3.07353	0.325359	0.415012		5.88292e-06	0.000470515	0.415247	0.0381905
						0.0137049	0	3.09007	0.323617	0.388305		6.53561e-06	0.00045683	0.388534	0.0436986													-0.33448	0.40201	3.05537	0.327292	0.4312		1.74136e-07	0.00045683	0.431429	0.00116431		-0.0972188	0.218707	3.07347	0.325365	0.415483		5.88588e-06	0.000470758	0.415718	0.0381899
						0.0132481	0	3.09001	0.323623	0.388762		6.53561e-06	0.00045683	0.38899	0.0436986													-0.334937	0.40201	3.05537	0.327293	0.431657		1.74136e-07	0.00045683	0.431886	0.00116431		-0.0976756	0.218821	3.07342	0.325371	0.415953		5.88886e-06	0.000471005	0.416189	0.0381892
						0.0127912	0	3.08995	0.32363	0.389219		6.53561e-06	0.00045683	0.389447	0.0436986													-0.335394	0.40201	3.05537	0.327293	0.432114		1.74136e-07	0.00045683	0.432342	0.00116431		-0.0981324	0.218936	3.07336	0.325377	0.416424		5.85642e-06	0.000471255	0.41666	0.0379588
						0.0123344	0	3.08989	0.323637	0.389676		6.53561e-06	0.00045683	0.389904	0.0436986													-0.335851	0.40201	3.05537	0.327293	0.432571		1.74136e-07	0.00045683	0.432799	0.00116431		-0.0985893	0.219051	3.07331	0.325383	0.416896		5.8094e-06	0.000471508	0.417131	0.0376338
						0.0118776	0	3.08982	0.323643	0.390132		6.53561e-06	0.00045683	0.390361	0.0436986													-0.336307	0.40201	3.05537	0.327293	0.433028		1.74222e-07	0.00045683	0.433256	0.00116488		-0.0990461	0.219168	3.07325	0.325388	0.417367		5.81268e-06	0.000471765	0.417603	0.0376346
						0.0114207	0	3.08976	0.32365	0.390589		6.53561e-06	0.00045683	0.390818	0.0436986													-0.336764	0.40201	3.05536	0.327293	0.433484		1.74619e-07	0.00045683	0.433713	0.00116754		-0.0995029	0.219286	3.0732	0.325394	0.417839		5.81598e-06	0.000472025	0.418075	0.0376351
						0.0109639	0	3.0897	0.323656	0.391046		6.53561e-06	0.00045683	0.391275	0.0436986													-0.337221	0.40201	3.05536	0.327293	0.433941		1.74619e-07	0.00045683	0.43417	0.00116754		-0.0999597	0.219405	3.07314	0.3254	0.418311		5.8193e-06	0.000472288	0.418547	0.0376356
						0.0105071	0	3.08964	0.323663	0.391503		6.53561e-06	0.00045683	0.391731	0.0436986													-0.337678	0.40201	3.05536	0.327294	0.434398		1.74619e-07	0.00045683	0.434627	0.00116754		-0.100417	0.219524	3.07309	0.325406	0.418783		5.78344e-06	0.000472556	0.419019	0.0373825
						0.0100503	0	3.08957	0.323669	0.39196		6.35959e-06	0.00045683	0.392188	0.0425217													-0.338135	0.40201	3.05536	0.327294	0.434855		1.74619e-07	0.00045683	0.435083	0.00116754		-0.100873	0.219645	3.07303	0.325412	0.419256		5.77762e-06	0.00047282	0.419492	0.0373241
						0.00959342	0	3.08951	0.323676	0.392417		6.35959e-06	0.00045683	0.392645	0.0425217													-0.338592	0.40201	3.05536	0.327294	0.435312		1.74619e-07	0.00045683	0.43554	0.00116754		-0.10133	0.219767	3.07298	0.325417	0.419729		5.78089e-06	0.000473086	0.419965	0.0373242
						0.00913659	0	3.08945	0.323682	0.392873		6.35959e-06	0.00045683	0.393102	0.0425217													-0.339048	0.40201	3.05536	0.327294	0.435769		1.74619e-07	0.00045683	0.435997	0.00116754		-0.101787	0.21989	3.07292	0.325423	0.420202		5.78417e-06	0.000473355	0.420438	0.0373241
						0.00867976	0	3.08939	0.323688	0.39333		6.35959e-06	0.00045683	0.393559	0.0425217													-0.339505	0.40201	3.05535	0.327294	0.436225		1.74619e-07	0.00045683	0.436454	0.00116754		-0.102244	0.220014	3.07287	0.325429	0.420675		5.78747e-06	0.000473629	0.420912	0.0373238
						0.00822293	0	3.08933	0.323695	0.393787		6.35959e-06	0.00045683	0.394016	0.0425217													-0.339962	0.40201	3.05535	0.327294	0.436682		1.74619e-07	0.00045683	0.436911	0.00116754		-0.102701	0.220139	3.07281	0.325435	0.421149		5.79079e-06	0.000473905	0.421386	0.0373234
						0.0077661	0	3.08927	0.323701	0.394244		6.35959e-06	0.00045683	0.394472	0.0425217													-0.340419	0.40201	3.05535	0.327295	0.437139		1.74619e-07	0.00045683	0.437367	0.00116754		-0.103158	0.220265	3.07276	0.325441	0.421623		5.79413e-06	0.000474186	0.42186	0.0373229
						0.00730927	0	3.08921	0.323707	0.394701		6.35959e-06	0.00045683	0.394929	0.0425217													-0.340876	0.40201	3.05535	0.327295	0.437596		1.74619e-07	0.00045683	0.437824	0.00116754		-0.103614	0.220392	3.0727	0.325446	0.422097		5.79748e-06	0.00047447	0.422334	0.0373221
						0.00685244	0	3.08915	0.323714	0.395158		6.35959e-06	0.00045683	0.395386	0.0425217													-0.341332	0.40201	3.05535	0.327295	0.438053		1.74853e-07	0.00045683	0.438281	0.0011691		-0.104071	0.220521	3.07265	0.325452	0.422571		5.80085e-06	0.000474758	0.422809	0.0373212
						0.00639561	0	3.08909	0.32372	0.395614		6.35959e-06	0.00045683	0.395843	0.0425217													-0.341789	0.40201	3.05535	0.327295	0.43851		1.75941e-07	0.00045683	0.438738	0.00117638		-0.104528	0.22065	3.07259	0.325458	0.423046		5.80425e-06	0.000475049	0.423283	0.0373201
						0.00593878	0	3.08903	0.323726	0.396071		6.35959e-06	0.00045683	0.3963	0.0425217													-0.342246	0.40201	3.05534	0.327295	0.438966		1.75941e-07	0.00045683	0.439195	0.00117638		-0.104985	0.22078	3.07254	0.325464	0.423521		5.7816e-06	0.000475345	0.423759	0.0371513
						0.00548196	0	3.08897	0.323733	0.396528		6.35959e-06	0.00045683	0.396757	0.0425217													-0.342703	0.40201	3.05534	0.327295	0.439423		1.75941e-07	0.00045683	0.439652	0.00117638		-0.105442	0.220911	3.07248	0.32547	0.423996		5.68848e-06	0.000475644	0.424234	0.0365299
						0.00502513	0	3.08891	0.323739	0.396985		6.18736e-06	0.00045683	0.397213	0.0413701													-0.34316	0.40201	3.05534	0.327296	0.43988		1.75941e-07	0.00045683	0.440108	0.00117638		-0.105899	0.221044	3.07243	0.325475	0.424472		5.69189e-06	0.00047594	0.42471	0.0365292
						0.0045683	0	3.08885	0.323745	0.397442		6.18736e-06	0.00045683	0.39767	0.0413701													-0.343617	0.40201	3.05534	0.327296	0.440337		1.75941e-07	0.00045683	0.440565	0.00117638		-0.106355	0.221177	3.07238	0.325481	0.424948		5.70427e-06	0.000476235	0.425186	0.036586
						0.00411147	0	3.08879	0.323752	0.397899		6.18736e-06	0.00045683	0.398127	0.0413701													-0.344073	0.40201	3.05534	0.327296	0.440794		1.75941e-07	0.00045683	0.441022	0.00117638		-0.106812	0.221312	3.07232	0.325487	0.425424		5.708e-06	0.000476532	0.425662	0.0365871
						0.00365464	0	3.08873	0.323758	0.398355		6.18736e-06	0.00045683	0.398584	0.0413701													-0.34453	0.40201	3.05534	0.327296	0.441251		1.75941e-07	0.00045683	0.441479	0.00117638		-0.107269	0.221448	3.07227	0.325492	0.425901		5.71176e-06	0.000476833	0.426139	0.036588
						0.00319781	0	3.08867	0.323764	0.398812		6.18736e-06	0.00045683	0.399041	0.0413701													-0.344987	0.40201	3.05533	0.327296	0.441707		1.75941e-07	0.00045683	0.441936	0.00117638		-0.107726	0.221584	3.07222	0.325498	0.426378		5.71553e-06	0.000477138	0.426616	0.0365888
						0.00274098	0	3.08861	0.32377	0.399269		6.18736e-06	0.00045683	0.399497	0.0413701													-0.345444	0.40201	3.05533	0.327297	0.442164		1.75941e-07	0.00045683	0.442393	0.00117638		-0.108183	0.221722	3.07216	0.325504	0.426855		5.71932e-06	0.000477446	0.427093	0.0365894
						0.00228415	0	3.08855	0.323776	0.399726		6.18736e-06	0.00045683	0.399954	0.0413701													-0.345901	0.40201	3.05533	0.327297	0.442621		1.75941e-07	0.00045683	0.442849	0.00117638		-0.10864	0.221861	3.07211	0.325509	0.427332		5.72314e-06	0.000477759	0.427571	0.0365898
						0.00182732	0	3.08849	0.323782	0.400183		6.18736e-06	0.00045683	0.400411	0.0413701													-0.346358	0.40201	3.05533	0.327297	0.443078		1.76275e-07	0.00045683	0.443306	0.00117861		-0.109096	0.222001	3.07205	0.325515	0.42781		5.72698e-06	0.000478076	0.428049	0.0365901
						0.00137049	0	3.08843	0.323789	0.40064		6.18736e-06	0.00045683	0.400868	0.0413701													-0.346814	0.40201	3.05533	0.327297	0.443535		1.77829e-07	0.00045683	0.443763	0.00118901		-0.109553	0.222142	3.072	0.325521	0.428288		5.73084e-06	0.000478397	0.428527	0.0365902
						0.000913659	0	3.08838	0.323795	0.401096		6.18736e-06	0.00045683	0.401325	0.0413701													-0.347271	0.40201	3.05533	0.327297	0.443992		1.77829e-07	0.00045683	0.44422	0.00118901		-0.11001	0.222284	3.07195	0.325527	0.428766		5.73472e-06	0.000478722	0.429006	0.0365901
						0.00045683	0	3.08832	0.323801	0.401553		6.18736e-06	0.00045683	0.401782	0.0413701													-0.347728	0.40201	3.05533	0.327297	0.444448		1.77829e-07	0.00045683	0.444677	0.00118901		-0.110467	0.222427	3.07189	0.325532	0.429245		5.68859e-06	0.000479052	0.429485	0.0362708
						-1.14258e-14	0	3.08826	0.323807	0.40201		6.01863e-06	0.00045683	0.402238	0.0402419													-0.348185	0.40201	3.05532	0.327298	0.444905		1.77829e-07	0.00045683	0.445134	0.00118901		-0.110924	0.222571	3.07184	0.325538	0.429724		5.68081e-06	0.000479376	0.429964	0.0361968
						-0.00045683	0	3.0882	0.323813	0.402467		6.01863e-06	0.00045683	0.402695	0.0402419													-0.348642	0.40201	3.05532	0.327298	0.445362		1.77829e-07	0.00045683	0.44559	0.00118901		-0.11138	0.222716	3.07178	0.325544	0.430204		5.68463e-06	0.000479701	0.430443	0.0361965
						-0.000913659	0	3.08814	0.323819	0.402924		6.01863e-06	0.00045683	0.403152	0.0402419													-0.349099	0.40201	3.05532	0.327298	0.445819		1.77829e-07	0.00045683	0.446047	0.00118901		-0.111837	0.222863	3.07173	0.325549	0.430683		5.68846e-06	0.000480031	0.430923	0.036196
						-0.00137049	0	3.08808	0.323825	0.403381		6.01863e-06	0.00045683	0.403609	0.0402419													-0.349555	0.40201	3.05532	0.327298	0.446276		1.77829e-07	0.00045683	0.446504	0.00118901		-0.112294	0.22301	3.07168	0.325555	0.431163		5.65913e-06	0.000480365	0.431403	0.0359843
						-0.00182732	0	3.08803	0.323831	0.403837		6.01863e-06	0.00045683	0.404066	0.0402419													-0.350012	0.40201	3.05532	0.327298	0.446732		1.77829e-07	0.00045683	0.446961	0.00118901		-0.112751	0.223159	3.07162	0.325561	0.431644		5.62599e-06	0.000480703	0.431884	0.0357484
						-0.00228415	0	3.08797	0.323837	0.404294		6.01863e-06	0.00045683	0.404523	0.0402419													-0.350469	0.40201	3.05532	0.327298	0.447189		1.77829e-07	0.00045683	0.447418	0.00118901		-0.113208	0.223308	3.07157	0.325566	0.432124		5.63014e-06	0.000481046	0.432365	0.0357494
						-0.00274098	0	3.08791	0.323843	0.404751		6.01863e-06	0.00045683	0.404979	0.0402419													-0.350926	0.40201	3.05531	0.327299	0.447646		1.77829e-07	0.00045683	0.447875	0.00118901		-0.113665	0.223459	3.07152	0.325572	0.432605		5.63432e-06	0.000481393	0.432846	0.0357501
						-0.00319781	0	3.08786	0.323849	0.405208		6.01863e-06	0.00045683	0.405436	0.0402419													-0.351383	0.40201	3.05531	0.327299	0.448103		1.78216e-07	0.00045683	0.448331	0.00119159		-0.114121	0.223611	3.07146	0.325578	0.433087		5.63853e-06	0.000481744	0.433328	0.0357507
						-0.00365464	0	3.0878	0.323855	0.405665		6.01863e-06	0.00045683	0.405893	0.0402419													-0.35184	0.40201	3.05531	0.327299	0.44856		1.80014e-07	0.00045683	0.448788	0.00120361		-0.114578	0.223764	3.07141	0.325583	0.433568		5.64276e-06	0.0004821	0.43381	0.0357511
						-0.00411147	0	3.08774	0.323861	0.406122		6.01863e-06	0.00045683	0.40635	0.0402419													-0.352296	0.40201	3.05531	0.327299	0.449017		1.80014e-07	0.00045683	0.449245	0.00120361		-0.115035	0.223918	3.07136	0.325589	0.434051		5.64702e-06	0.00048246	0.434292	0.0357514
						-0.0045683	0	3.08768	0.323867	0.406578		6.01863e-06	0.00045683	0.406807	0.0402419													-0.352753	0.40201	3.05531	0.327299	0.449473		1.80014e-07	0.00045683	0.449702	0.00120361		-0.115492	0.224073	3.0713	0.325595	0.434533		5.59634e-06	0.000482825	0.434774	0.0354038
						-0.00502513	0	3.08763	0.323873	0.407035		5.8531e-06	0.00045683	0.407264	0.0391352													-0.35321	0.40201	3.05531	0.3273	0.44993		1.80014e-07	0.00045683	0.450159	0.00120361		-0.115949	0.224229	3.07125	0.3256	0.435016		5.58778e-06	0.000483183	0.435257	0.0353234
						-0.00548196	0	3.08757	0.323879	0.407492		5.8531e-06	0.00045683	0.40772	0.0391352													-0.353667	0.40201	3.0553	0.3273	0.450387		1.80014e-07	0.00045683	0.450616	0.00120361		-0.116406	0.224386	3.0712	0.325606	0.435499		5.59195e-06	0.000483543	0.435741	0.0353235
						-0.00593878	0	3.08751	0.323885	0.407949		5.8531e-06	0.00045683	0.408177	0.0391352													-0.354124	0.40201	3.0553	0.3273	0.450844		1.80014e-07	0.00045683	0.451072	0.00120361		-0.116862	0.224545	3.07115	0.325611	0.435983		5.59614e-06	0.000483907	0.436225	0.0353234
						-0.00639561	0	3.08746	0.323891	0.408406		5.8531e-06	0.00045683	0.408634	0.0391352													-0.354581	0.40201	3.0553	0.3273	0.451301		1.80014e-07	0.00045683	0.451529	0.00120361		-0.117319	0.224705	3.07109	0.325617	0.436467		5.60036e-06	0.000484276	0.436709	0.0353231
						-0.00685244	0	3.0874	0.323897	0.408862		5.8531e-06	0.00045683	0.409091	0.0391352													-0.355037	0.40201	3.0553	0.3273	0.451758		1.80014e-07	0.00045683	0.451986	0.00120361		-0.117776	0.224865	3.07104	0.325623	0.436951		5.60461e-06	0.000484649	0.437193	0.0353227
						-0.00730927	0	3.08735	0.323903	0.409319		5.8531e-06	0.00045683	0.409548	0.0391352													-0.355494	0.40201	3.0553	0.3273	0.452214		1.80014e-07	0.00045683	0.452443	0.00120361		-0.118233	0.225027	3.07099	0.325628	0.437435		5.60888e-06	0.000485027	0.437678	0.035322
						-0.0077661	0	3.08729	0.323909	0.409776		5.8531e-06	0.00045683	0.410005	0.0391352													-0.355951	0.40201	3.05529	0.327301	0.452671		1.80014e-07	0.00045683	0.4529	0.00120361		-0.11869	0.22519	3.07093	0.325634	0.43792		5.61318e-06	0.00048541	0.438163	0.0353213
						-0.00822293	0	3.08724	0.323914	0.410233		5.8531e-06	0.00045683	0.410461	0.0391352													-0.356408	0.40201	3.05529	0.327301	0.453128		1.80403e-07	0.00045683	0.453357	0.00120622		-0.119147	0.225354	3.07088	0.325639	0.438406		5.61751e-06	0.000485797	0.438649	0.0353203
						-0.00867976	0	3.08718	0.32392	0.41069		5.8531e-06	0.00045683	0.410918	0.0391352													-0.356865	0.40201	3.05529	0.327301	0.453585		1.82216e-07	0.00045683	0.453813	0.00121834		-0.119603	0.225519	3.07083	0.325645	0.438892		5.62187e-06	0.000486189	0.439135	0.0353192
						-0.00913659	0	3.08712	0.323926	0.411147		5.8531e-06	0.00045683	0.411375	0.0391352													-0.357322	0.40201	3.05529	0.327301	0.454042		1.82216e-07	0.00045683	0.45427	0.00121834		-0.12006	0.225686	3.07078	0.325651	0.439378		5.58478e-06	0.000486587	0.439621	0.0350575
						-0.00959342	0	3.08707	0.323932	0.411603		5.8531e-06	0.00045683	0.411832	0.0391352													-0.357778	0.40201	3.05529	0.327301	0.454499		1.82216e-07	0.00045683	0.454727	0.00121834		-0.120517	0.225853	3.07072	0.325656	0.439864		5.50879e-06	0.000486989	0.440108	0.0345519
						-0.0100503	0	3.08701	0.323938	0.41206		5.69053e-06	0.00045683	0.412289	0.0380482													-0.358235	0.40201	3.05529	0.327302	0.454955		1.82216e-07	0.00045683	0.455184	0.00121834		-0.120974	0.226022	3.07067	0.325662	0.440351		5.50756e-06	0.000487383	0.440595	0.0345163
						-0.0105071	0	3.08696	0.323944	0.412517		5.69053e-06	0.00045683	0.412746	0.0380482													-0.358692	0.40201	3.05528	0.327302	0.455412		1.82216e-07	0.00045683	0.455641	0.00121834		-0.121431	0.226192	3.07062	0.325667	0.440839		5.52641e-06	0.000487776	0.441083	0.0346065
						-0.0109639	0	3.0869	0.323949	0.412974		5.69053e-06	0.00045683	0.413202	0.0380482													-0.359149	0.40201	3.05528	0.327302	0.455869		1.82216e-07	0.00045683	0.456098	0.00121834		-0.121888	0.226363	3.07057	0.325673	0.441327		5.53106e-06	0.000488171	0.441571	0.0346076
						-0.0114207	0	3.08685	0.323955	0.413431		5.69053e-06	0.00045683	0.413659	0.0380482													-0.359606	0.40201	3.05528	0.327302	0.456326		1.82216e-07	0.00045683	0.456554	0.00121834		-0.122344	0.226535	3.07051	0.325678	0.441815		5.53574e-06	0.000488571	0.442059	0.0346085
						-0.0118776	0	3.0868	0.323961	0.413888		5.69053e-06	0.00045683	0.414116	0.0380482													-0.360062	0.40201	3.05528	0.327302	0.456783		1.82216e-07	0.00045683	0.457011	0.00121834		-0.122801	0.226708	3.07046	0.325684	0.442303		5.54045e-06	0.000488976	0.442548	0.0346092
						-0.0123344	0	3.08674	0.323966	0.414344		5.69053e-06	0.00045683	0.414573	0.0380482													-0.360519	0.40201	3.05528	0.327302	0.45724		1.82216e-07	0.00045683	0.457468	0.00121834		-0.123258	0.226883	3.07041	0.325689	0.442792		5.54518e-06	0.000489386	0.443037	0.0346098
						-0.0127912	0	3.08669	0.323972	0.414801		5.69053e-06	0.00045683	0.41503	0.0380482													-0.360976	0.40201	3.05528	0.327303	0.457696		1.82216e-07	0.00045683	0.457925	0.00121834		-0.123715	0.227058	3.07036	0.325695	0.443282		5.54996e-06	0.000489801	0.443527	0.0346103
						-0.0132481	0	3.08663	0.323978	0.415258		5.69053e-06	0.00045683	0.415487	0.0380482													-0.361433	0.40201	3.05527	0.327303	0.458153		1.82554e-07	0.00045683	0.458382	0.0012206		-0.124172	0.227235	3.07031	0.3257	0.443771		5.55476e-06	0.000490222	0.444017	0.0346105
						-0.0137049	0	3.08658	0.323983	0.415715		5.69053e-06	0.00045683	0.415943	0.0380482													-0.36189	0.40201	3.05527	0.327303	0.45861		1.84128e-07	0.00045683	0.458838	0.00123112		-0.124629	0.227413	3.07025	0.325706	0.444262		5.5596e-06	0.000490647	0.444507	0.0346106
						-0.0141617	0	3.08652	0.323989	0.416172		5.69053e-06	0.00045683	0.4164	0.0380482													-0.362347	0.40201	3.05527	0.327303	0.459067		1.84128e-07	0.00045683	0.459295	0.00123112		-0.125085	0.227592	3.0702	0.325712	0.444752		5.56446e-06	0.000491078	0.444998	0.0346105
						-0.0146185	0	3.08647	0.323995	0.416629		5.69053e-06	0.00045683	0.416857	0.0380482													-0.362803	0.40201	3.05527	0.327303	0.459524		1.84128e-07	0.00045683	0.459752	0.00123112		-0.125542	0.227772	3.07015	0.325717	0.445243		5.50377e-06	0.000491514	0.445489	0.0342026
						-0.0150754	0	3.08642	0.324	0.417085		5.53067e-06	0.00045683	0.417314	0.0369793													-0.36326	0.40201	3.05527	0.327304	0.459981		1.84128e-07	0.00045683	0.460209	0.00123112		-0.125999	0.227953	3.0701	0.325723	0.445735		5.49333e-06	0.00049194	0.445981	0.0341082
						-0.0155322	0	3.08636	0.324006	0.417542		5.53067e-06	0.00045683	0.417771	0.0369793													-0.363717	0.40201	3.05527	0.327304	0.460437		1.84128e-07	0.00045683	0.460666	0.00123112		-0.126456	0.228136	3.07004	0.325728	0.446227		5.49808e-06	0.000492367	0.446473	0.0341081
						-0.015989	0	3.08631	0.324011	0.417999		5.53067e-06	0.00045683	0.418228	0.0369793													-0.364174	0.40201	3.05526	0.327304	0.460894		1.84128e-07	0.00045683	0.461123	0.00123112		-0.126913	0.228319	3.06999	0.325734	0.446719		5.50286e-06	0.0004928	0.446966	0.0341078
						-0.0164459	0	3.08626	0.324017	0.418456		5.53067e-06	0.00045683	0.418684	0.0369793													-0.364631	0.40201	3.05526	0.327304	0.461351		1.84128e-07	0.00045683	0.461579	0.00123112		-0.12737	0.228504	3.06994	0.325739	0.447212		5.50767e-06	0.000493237	0.447459	0.0341073
						-0.0169027	0	3.0862	0.324023	0.418913		5.53067e-06	0.00045683	0.419141	0.0369793													-0.365088	0.40201	3.05526	0.327304	0.461808		1.84128e-07	0.00045683	0.462036	0.00123112		-0.127826	0.22869	3.06989	0.325745	0.447705		5.51252e-06	0.00049368	0.447952	0.0341067
						-0.0173595	0	3.08615	0.324028	0.41937		5.53067e-06	0.00045683	0.419598	0.0369793													-0.365544	0.40201	3.05526	0.327304	0.462265		1.84128e-07	0.00045683	0.462493	0.00123112		-0.128283	0.228877	3.06984	0.32575	0.448199		5.48216e-06	0.000494129	0.448446	0.0338881
						-0.0178164	0	3.0861	0.324034	0.419826		5.53067e-06	0.00045683	0.420055	0.0369793													-0.366001	0.40201	3.05526	0.327305	0.462722		1.84128e-07	0.00045683	0.46295	0.00123112		-0.12874	0.229066	3.06979	0.325756	0.448693		5.46907e-06	0.000494583	0.44894	0.0337761
						-0.0182732	0	3.08605	0.324039	0.420283		5.53067e-06	0.00045683	0.420512	0.0369793													-0.366458	0.40201	3.05526	0.327305	0.463178		1.8435e-07	0.00045683	0.463407	0.0012326		-0.129197	0.229255	3.06973	0.325761	0.449188		5.47426e-06	0.000495043	0.449435	0.0337768
						-0.01873	0	3.08599	0.324045	0.42074		5.53067e-06	0.00045683	0.420968	0.0369793													-0.366915	0.40201	3.05525	0.327305	0.463635		1.8538e-07	0.00045683	0.463864	0.00123949		-0.129654	0.229446	3.06968	0.325767	0.449683		5.47948e-06	0.000495508	0.44993	0.0337772
						-0.0191868	0	3.08594	0.32405	0.421197		5.53067e-06	0.00045683	0.421425	0.0369793													-0.367372	0.40201	3.05525	0.327305	0.464092		1.8538e-07	0.00045683	0.46432	0.00123949		-0.130111	0.229638	3.06963	0.325772	0.450178		5.48474e-06	0.000495979	0.450426	0.0337775
						-0.0196437	0	3.08589	0.324056	0.421654		5.53067e-06	0.00045683	0.421882	0.0369793													-0.367829	0.40201	3.05525	0.327305	0.464549		1.8538e-07	0.00045683	0.464777	0.00123949		-0.130567	0.229831	3.06958	0.325778	0.450674		5.42053e-06	0.000496456	0.450922	0.0333501
						-0.0201005	0	3.08584	0.324061	0.422111		5.3733e-06	0.00045683	0.422339	0.0359271													-0.368285	0.40201	3.05525	0.327306	0.465006		1.8538e-07	0.00045683	0.465234	0.00123949		-0.131024	0.230025	3.06953	0.325783	0.451171		5.40956e-06	0.000496921	0.451419	0.0332514
						-0.0205573	0	3.08579	0.324067	0.422567		5.3733e-06	0.00045683	0.422796	0.0359271													-0.368742	0.40201	3.05525	0.327306	0.465463		1.8538e-07	0.00045683	0.465691	0.00123949		-0.131481	0.230221	3.06948	0.325788	0.451668		5.41468e-06	0.000497386	0.451916	0.0332517
						-0.0210142	0	3.08573	0.324072	0.423024		5.3733e-06	0.00045683	0.423253	0.0359271													-0.369199	0.40201	3.05525	0.327306	0.465919		1.8538e-07	0.00045683	0.466148	0.00123949		-0.131938	0.230418	3.06943	0.325794	0.452165		5.41983e-06	0.000497858	0.452414	0.0332518
						-0.021471	0	3.08568	0.324077	0.423481		5.3733e-06	0.00045683	0.423709	0.0359271													-0.369656	0.40201	3.05524	0.327306	0.466376		1.8538e-07	0.00045683	0.466605	0.00123949		-0.132395	0.230615	3.06938	0.325799	0.452663		5.42502e-06	0.000498335	0.452912	0.0332518
						-0.0219278	0	3.08563	0.324083	0.423938		5.3733e-06	0.00045683	0.424166	0.0359271													-0.370113	0.40201	3.05524	0.327306	0.466833		1.8538e-07	0.00045683	0.467061	0.00123949		-0.132851	0.230815	3.06932	0.325805	0.453161		5.43024e-06	0.000498818	0.453411	0.0332516
						-0.0223847	0	3.08558	0.324088	0.424395		5.3733e-06	0.00045683	0.424623	0.0359271													-0.37057	0.40201	3.05524	0.327307	0.46729		1.8538e-07	0.00045683	0.467518	0.00123949		-0.133308	0.231015	3.06927	0.32581	0.45366		5.44263e-06	0.000499306	0.45391	0.0332949
						-0.0228415	0	3.08553	0.324094	0.424852		5.3733e-06	0.00045683	0.42508	0.0359271													-0.371026	0.40201	3.05524	0.327307	0.467747		1.8538e-07	0.00045683	0.467975	0.00123949		-0.133765	0.231216	3.06922	0.325816	0.454159		5.46463e-06	0.000499799	0.454409	0.0333965
						-0.0232983	0	3.08548	0.324099	0.425308		5.3733e-06	0.00045683	0.425537	0.0359271													-0.371483	0.40201	3.05524	0.327307	0.468203		1.85396e-07	0.00045683	0.468432	0.0012396		-0.134222	0.231419	3.06917	0.325821	0.454659		5.47005e-06	0.000500294	0.454909	0.0333965
						-0.0237551	0	3.08543	0.324104	0.425765		5.3733e-06	0.00045683	0.425994	0.0359271													-0.37194	0.40201	3.05523	0.327307	0.46866		1.85471e-07	0.00045683	0.468889	0.0012401		-0.134679	0.231623	3.06912	0.325826	0.455159		5.4755e-06	0.000500794	0.45541	0.0333964
						-0.024212	0	3.08538	0.32411	0.426222		5.3733e-06	0.00045683	0.42645	0.0359271													-0.372397	0.40201	3.05523	0.327307	0.469117		1.85471e-07	0.00045683	0.469346	0.0012401		-0.135136	0.231828	3.06907	0.325832	0.45566		5.481e-06	0.000501301	0.455911	0.0333961
						-0.0246688	0	3.08532	0.324115	0.426679		5.3733e-06	0.00045683	0.426907	0.0359271													-0.372854	0.40201	3.05523	0.327307	0.469574		1.85471e-07	0.00045683	0.469802	0.0012401		-0.135592	0.232035	3.06902	0.325837	0.456161		5.41068e-06	0.000501815	0.456412	0.0329339
						-0.0251256	0	3.08527	0.32412	0.427136		5.2182e-06	0.00045683	0.427364	0.0348901													-0.373311	0.40201	3.05523	0.327308	0.470031		1.85471e-07	0.00045683	0.470259	0.0012401		-0.136049	0.232242	3.06896	0.325843	0.456663		5.39846e-06	0.000502313	0.456914	0.0328269
						-0.0255825	0	3.08522	0.324126	0.427593		5.2182e-06	0.00045683	0.427821	0.0348901													-0.373767	0.40201	3.05523	0.327308	0.470488		1.85471e-07	0.00045683	0.470716	0.0012401		-0.136506	0.232451	3.06891	0.325848	0.457166		5.40379e-06	0.000502813	0.457417	0.0328267
						-0.0260393	0	3.08517	0.324131	0.428049		5.2182e-06	0.00045683	0.428278	0.0348901													-0.374224	0.40201	3.05523	0.327308	0.470944		1.85471e-07	0.00045683	0.471173	0.0012401		-0.136963	0.232661	3.06886	0.325854	0.457668		5.40477e-06	0.000503318	0.45792	0.0327997
						-0.0264961	0	3.08512	0.324136	0.428506		5.2182e-06	0.00045683	0.428735	0.0348901													-0.374681	0.40201	3.05522	0.327308	0.471401		1.85471e-07	0.00045683	0.47163	0.0012401		-0.13742	0.232873	3.06881	0.325859	0.458172		5.37093e-06	0.00050383	0.458424	0.0325612
						-0.0269529	0	3.08507	0.324141	0.428963		5.2182e-06	0.00045683	0.429191	0.0348901													-0.375138	0.40201	3.05522	0.327308	0.471858		1.85471e-07	0.00045683	0.472087	0.0012401		-0.137877	0.233085	3.06876	0.325864	0.458676		5.3766e-06	0.000504348	0.458928	0.0325621
						-0.0274098	0	3.08503	0.324146	0.42942		5.2182e-06	0.00045683	0.429648	0.0348901													-0.375595	0.40201	3.05522	0.327309	0.472315		1.85471e-07	0.00045683	0.472543	0.0012401		-0.138333	0.233299	3.06871	0.32587	0.45918		5.38232e-06	0.000504872	0.459432	0.0325629
						-0.0278666	0	3.08498	0.324152	0.429877		5.2182e-06	0.00045683	0.430105	0.0348901													-0.376052	0.40201	3.05522	0.327309	0.472772		1.85471e-07	0.00045683	0.473	0.0012401		-0.13879	0.233514	3.06866	0.325875	0.459685		5.38807e-06	0.000505403	0.459937	0.0325635
						-0.0283234	0	3.08493	0.324157	0.430333		5.2182e-06	0.00045683	0.430562	0.0348901													-0.376508	0.40201	3.05522	0.327309	0.473229		1.85147e-07	0.00045683	0.473457	0.00123794		-0.139247	0.23373	3.06861	0.325881	0.46019		5.39387e-06	0.00050594	0.460443	0.0325639
						-0.0287803	0	3.08488	0.324162	0.43079		5.2182e-06	0.00045683	0.431019	0.0348901													-0.376965	0.40201	3.05522	0.327309	0.473685		1.8364e-07	0.00045683	0.473914	0.00122786		-0.139704	0.233947	3.06856	0.325886	0.460696		5.39972e-06	0.000506484	0.460949	0.0325642
						-0.0292371	0	3.08483	0.324167	0.431247		5.2182e-06	0.00045683	0.431476	0.0348901													-0.377422	0.40201	3.05521	0.327309	0.474142		1.8364e-07	0.00045683	0.474371	0.00122786		-0.140161	0.234166	3.06851	0.325891	0.461203		5.4056e-06	0.000507034	0.461456	0.0325643
						-0.0296939	0	3.08478	0.324173	0.431704		5.2182e-06	0.00045683	0.431932	0.0348901													-0.377879	0.40201	3.05521	0.327309	0.474599		1.8364e-07	0.00045683	0.474828	0.00122786		-0.140618	0.234386	3.06846	0.325897	0.46171		5.33254e-06	0.000507591	0.461963	0.0320889
						-0.0301508	0	3.08473	0.324178	0.432161		5.06518e-06	0.00045683	0.432389	0.0338669													-0.378336	0.40201	3.05521	0.32731	0.475056		1.8364e-07	0.00045683	0.475284	0.00122786		-0.141074	0.234607	3.06841	0.325902	0.462217		5.31995e-06	0.000508131	0.462471	0.0319792
						-0.0306076	0	3.08468	0.324183	0.432618		5.06518e-06	0.00045683	0.432846	0.0338669													-0.378793	0.40201	3.05521	0.32731	0.475513		1.8364e-07	0.00045683	0.475741	0.00122786		-0.141531	0.23483	3.06836	0.325907	0.462725		5.32566e-06	0.000508672	0.46298	0.0319794
						-0.0310644	0	3.08463	0.324188	0.433074		5.06518e-06	0.00045683	0.433303	0.0338669													-0.379249	0.40201	3.05521	0.32731	0.47597		1.8364e-07	0.00045683	0.476198	0.00122786		-0.141988	0.235054	3.06831	0.325913	0.463234		5.3314e-06	0.000509219	0.463489	0.0319796
						-0.0315212	0	3.08458	0.324193	0.433531		5.06518e-06	0.00045683	0.43376	0.0338669													-0.379706	0.40201	3.05521	0.32731	0.476426		1.8364e-07	0.00045683	0.476655	0.00122786		-0.142445	0.235278	3.06826	0.325918	0.463743		5.33719e-06	0.000509772	0.463998	0.0319795
						-0.0319781	0	3.08453	0.324198	0.433988		5.06518e-06	0.00045683	0.434217	0.0338669													-0.380163	0.40201	3.0552	0.32731	0.476883		1.8364e-07	0.00045683	0.477112	0.00122786		-0.142902	0.235505	3.06821	0.325923	0.464253		5.34302e-06	0.000510333	0.464508	0.0319793
						-0.0324349	0	3.08449	0.324203	0.434445		5.06518e-06	0.00045683	0.434673	0.0338669													-0.38062	0.40201	3.0552	0.327311	0.47734		1.8364e-07	0.00045683	0.477568	0.00122786		-0.143359	0.235732	3.06816	0.325929	0.464763		5.3489e-06	0.000510899	0.465019	0.031979
						-0.0328917	0	3.08444	0.324208	0.434902		5.06518e-06	0.00045683	0.43513	0.0338669													-0.381077	0.40201	3.0552	0.327311	0.477797		1.8364e-07	0.00045683	0.478025	0.00122786		-0.143815	0.235961	3.06811	0.325934	0.465274		5.35582e-06	0.000511473	0.46553	0.0319844
						-0.0333486	0	3.08439	0.324213	0.435359		5.06518e-06	0.00045683	0.435587	0.0338669													-0.381533	0.40201	3.0552	0.327311	0.478254		1.82739e-07	0.00045683	0.478482	0.00122183		-0.144272	0.236191	3.06805	0.325939	0.465786		5.38383e-06	0.000512054	0.466042	0.0321152
						-0.0338054	0	3.08434	0.324218	0.435815		5.06518e-06	0.00045683	0.436044	0.0338669													-0.38199	0.40201	3.0552	0.327311	0.478711		1.7854e-07	0.00045683	0.478939	0.00119376		-0.144729	0.236422	3.068	0.325945	0.466298		5.3899e-06	0.000512635	0.466554	0.032115
						-0.0342622	0	3.08429	0.324223	0.436272		5.06518e-06	0.00045683	0.436501	0.0338669													-0.382447	0.40201	3.0552	0.327311	0.479167		1.7854e-07	0.00045683	0.479396	0.00119376		-0.145186	0.236655	3.06795	0.32595	0.46681		5.39602e-06	0.000513224	0.467067	0.0321146
						-0.034719	0	3.08425	0.324228	0.436729		5.06518e-06	0.00045683	0.436958	0.0338669													-0.382904	0.40201	3.05519	0.327311	0.479624		1.7854e-07	0.00045683	0.479853	0.00119376		-0.145643	0.236889	3.0679	0.325956	0.467324		5.31692e-06	0.00051382	0.467581	0.0316071
						-0.0351759	0	3.0842	0.324233	0.437186		4.91403e-06	0.00045683	0.437414	0.0328563													-0.383361	0.40201	3.05519	0.327312	0.480081		1.7854e-07	0.00045683	0.480309	0.00119376		-0.1461	0.237124	3.06785	0.325961	0.467837		5.3031e-06	0.000514396	0.468095	0.0314897
						-0.0356327	0	3.08415	0.324238	0.437643		4.91403e-06	0.00045683	0.437871	0.0328563													-0.383818	0.40201	3.05519	0.327312	0.480538		1.7854e-07	0.00045683	0.480766	0.00119376		-0.146556	0.23736	3.0678	0.325966	0.468352		5.30902e-06	0.000514972	0.468609	0.0314895
						-0.0360895	0	3.0841	0.324243	0.4381		4.91403e-06	0.00045683	0.438328	0.0328563													-0.384274	0.40201	3.05519	0.327312	0.480995		1.7854e-07	0.00045683	0.481223	0.00119376		-0.147013	0.237598	3.06775	0.325972	0.468867		5.30169e-06	0.000515555	0.469125	0.0314105
						-0.0365464	0	3.08406	0.324248	0.438556		4.91403e-06	0.00045683	0.438785	0.0328563													-0.384731	0.40201	3.05519	0.327312	0.481452		1.7854e-07	0.00045683	0.48168	0.00119376		-0.14747	0.237837	3.0677	0.325977	0.469382		5.28721e-06	0.000516145	0.46964	0.0312889
						-0.0370032	0	3.08401	0.324253	0.439013		4.91403e-06	0.00045683	0.439242	0.0328563													-0.385188	0.40201	3.05519	0.327312	0.481908		1.7854e-07	0.00045683	0.482137	0.00119376		-0.147927	0.238077	3.06765	0.325982	0.469899		5.29347e-06	0.000516743	0.470157	0.0312897
						-0.03746	0	3.08396	0.324258	0.43947		4.91403e-06	0.00045683	0.439698	0.0328563													-0.385645	0.40201	3.05518	0.327313	0.482365		1.7854e-07	0.00045683	0.482594	0.00119376		-0.148384	0.238319	3.0676	0.325987	0.470415		5.29978e-06	0.000517347	0.470674	0.0312904
						-0.0379169	0	3.08392	0.324263	0.439927		4.91403e-06	0.00045683	0.440155	0.0328563													-0.386102	0.40201	3.05518	0.327313	0.482822		1.7854e-07	0.00045683	0.48305	0.00119376		-0.148841	0.238562	3.06755	0.325993	0.470933		5.30613e-06	0.000517959	0.471192	0.0312909
						-0.0383737	0	3.08387	0.324268	0.440384		4.91403e-06	0.00045683	0.440612	0.0328563													-0.386559	0.40201	3.05518	0.327313	0.483279		1.76557e-07	0.00045683	0.483507	0.0011805		-0.149297	0.238806	3.0675	0.325998	0.471451		5.31254e-06	0.000518579	0.47171	0.0312913
						-0.0388305	0	3.08382	0.324273	0.440841		4.91403e-06	0.00045683	0.441069	0.0328563													-0.387015	0.40201	3.05518	0.327313	0.483736		1.67327e-07	0.00045683	0.483964	0.00111878		-0.149754	0.239051	3.06745	0.326003	0.471969		5.319e-06	0.000519205	0.472229	0.0312915
						-0.0392873	0	3.08378	0.324278	0.441297		4.91403e-06	0.00045683	0.441526	0.0328563													-0.387472	0.40201	3.05518	0.327313	0.484193		1.67327e-07	0.00045683	0.484421	0.00111878		-0.150211	0.239298	3.0674	0.326009	0.472488		5.32551e-06	0.00051984	0.472748	0.0312915
						-0.0397442	0	3.08373	0.324283	0.441754		4.91403e-06	0.00045683	0.441983	0.0328563													-0.387929	0.40201	3.05518	0.327313	0.484649		1.67327e-07	0.00045683	0.484878	0.00111878		-0.150668	0.239546	3.06735	0.326014	0.473008		5.24453e-06	0.000520483	0.473268	0.0307777
						-0.040201	0	3.08368	0.324288	0.442211		4.76459e-06	0.00045683	0.442439	0.0318572													-0.388386	0.40201	3.05517	0.327314	0.485106		1.67327e-07	0.00045683	0.485335	0.00111878		-0.151125	0.239795	3.0673	0.326019	0.473529		5.23055e-06	0.000521102	0.473789	0.0306592
						-0.0406578	0	3.08364	0.324292	0.442668		4.76459e-06	0.00045683	0.442896	0.0318572													-0.388843	0.40201	3.05517	0.327314	0.485563		1.67327e-07	0.00045683	0.485791	0.00111878		-0.151581	0.240046	3.06725	0.326024	0.47405		5.23683e-06	0.000521721	0.474311	0.0306595
						-0.0411147	0	3.08359	0.324297	0.443125		4.76459e-06	0.00045683	0.443353	0.0318572													-0.3893	0.40201	3.05517	0.327314	0.48602		1.67327e-07	0.00045683	0.486248	0.00111878		-0.152038	0.240298	3.06721	0.32603	0.474572		5.24315e-06	0.000522348	0.474833	0.0306597
						-0.0415715	0	3.08355	0.324302	0.443582		4.76459e-06	0.00045683	0.44381	0.0318572													-0.389756	0.40201	3.05517	0.327314	0.486477		1.67327e-07	0.00045683	0.486705	0.00111878		-0.152495	0.240551	3.06716	0.326035	0.475094		5.24953e-06	0.000522982	0.475355	0.0306598
						-0.0420283	0	3.0835	0.324307	0.444038		4.76459e-06	0.00045683	0.444267	0.0318572													-0.390213	0.40201	3.05517	0.327314	0.486934		1.67327e-07	0.00045683	0.487162	0.00111878		-0.152952	0.240806	3.06711	0.32604	0.475617		5.25596e-06	0.000523623	0.475879	0.0306597
						-0.0424852	0	3.08346	0.324311	0.444495		4.76459e-06	0.00045683	0.444724	0.0318572													-0.39067	0.40201	3.05517	0.327314	0.48739		1.67327e-07	0.00045683	0.487619	0.00111878		-0.153409	0.241062	3.06706	0.326045	0.47614		5.27117e-06	0.000524273	0.476403	0.0307104
						-0.042942	0	3.08341	0.324316	0.444952		4.76459e-06	0.00045683	0.44518	0.0318572													-0.391127	0.40201	3.05516	0.327315	0.487847		1.67327e-07	0.00045683	0.488076	0.00111878		-0.153866	0.241319	3.06701	0.326051	0.476665		5.28891e-06	0.000524927	0.476927	0.0307753
						-0.0433988	0	3.08337	0.324321	0.445409		4.76459e-06	0.00045683	0.445637	0.0318572													-0.391584	0.40201	3.05516	0.327315	0.488304		1.62883e-07	0.00045683	0.488532	0.00108907		-0.154322	0.241578	3.06696	0.326056	0.47719		5.29554e-06	0.000525586	0.477452	0.0307753
						-0.0438556	0	3.08332	0.324326	0.445866		4.76459e-06	0.00045683	0.446094	0.0318572													-0.392041	0.40201	3.05516	0.327315	0.488761		1.42191e-07	0.00045683	0.488989	0.00095072		-0.154779	0.241838	3.06691	0.326061	0.477715		5.30222e-06	0.000526253	0.477978	0.030775
						-0.0443125	0	3.08328	0.32433	0.446323		4.76459e-06	0.00045683	0.446551	0.0318572													-0.392497	0.40201	3.05516	0.327315	0.489218		1.42191e-07	0.00045683	0.489446	0.00095072		-0.155236	0.242099	3.06686	0.326067	0.478242		5.30896e-06	0.000526928	0.478505	0.0307747
						-0.0447693	0	3.08323	0.324335	0.446779		4.76459e-06	0.00045683	0.447008	0.0318572													-0.392954	0.40201	3.05516	0.327315	0.489674		1.42191e-07	0.00045683	0.489903	0.00095072		-0.155693	0.242361	3.06681	0.326072	0.478768		5.22229e-06	0.000527612	0.479032	0.030233
						-0.0452261	0	3.08318	0.32434	0.447236		4.61669e-06	0.00045683	0.447465	0.0308682													-0.393411	0.40201	3.05516	0.327315	0.490131		1.42191e-07	0.00045683	0.49036	0.00095072		-0.15615	0.242625	3.06676	0.326077	0.479296		5.20714e-06	0.000528269	0.47956	0.0301078
						-0.045683	0	3.08314	0.324345	0.447693		4.61669e-06	0.00045683	0.447921	0.0308682													-0.393868	0.40201	3.05516	0.327315	0.490588		1.42191e-07	0.00045683	0.490817	0.00095072		-0.156607	0.242891	3.06671	0.326082	0.479824		5.21362e-06	0.000528926	0.480089	0.0301078
						-0.0461398	0	3.0831	0.324349	0.44815		4.61669e-06	0.00045683	0.448378	0.0308682													-0.394325	0.40201	3.05515	0.327316	0.491045		1.42191e-07	0.00045683	0.491273	0.00095072		-0.157063	0.243157	3.06666	0.326088	0.480353		5.22015e-06	0.000529591	0.480618	0.0301077
						-0.0465966	0	3.08305	0.324354	0.448607		4.61669e-06	0.00045683	0.448835	0.0308682													-0.394782	0.40201	3.05515	0.327316	0.491502		1.42191e-07	0.00045683	0.49173	0.00095072		-0.15752	0.243425	3.06661	0.326093	0.480883		5.22674e-06	0.000530263	0.481148	0.0301075
						-0.0470534	0	3.08301	0.324358	0.449063		4.61669e-06	0.00045683	0.449292	0.0308682													-0.395238	0.40201	3.05515	0.327316	0.491959		1.42191e-07	0.00045683	0.492187	0.00095072		-0.157977	0.243694	3.06656	0.326098	0.481413		5.23338e-06	0.000530944	0.481679	0.0301071
						-0.0475103	0	3.08297	0.324363	0.44952		4.61669e-06	0.00045683	0.449749	0.0308682													-0.395695	0.40201	3.05515	0.327316	0.492415		1.42191e-07	0.00045683	0.492644	0.00095072		-0.158434	0.243965	3.06651	0.326103	0.481944		5.22939e-06	0.000531633	0.48221	0.0300451
						-0.0479671	0	3.08292	0.324368	0.449977		4.61669e-06	0.00045683	0.450206	0.0308682													-0.396152	0.40201	3.05515	0.327316	0.492872		1.42191e-07	0.00045683	0.493101	0.00095072		-0.158891	0.244237	3.06646	0.326108	0.482476		5.22262e-06	0.00053233	0.482742	0.0299669
						-0.0484239	0	3.08288	0.324372	0.450434		4.61669e-06	0.00045683	0.450662	0.0308682													-0.396609	0.40201	3.05515	0.327316	0.493329		1.28376e-07	0.00045683	0.493558	0.000858348		-0.159348	0.24451	3.06642	0.326114	0.483008		5.22961e-06	0.000533036	0.483275	0.0299673
						-0.0488808	0	3.08283	0.324377	0.450891		4.61669e-06	0.00045683	0.451119	0.0308682													-0.397066	0.40201	3.05515	0.327316	0.493786		6.40495e-08	0.00045683	0.494014	0.000428249		-0.159804	0.244785	3.06637	0.326119	0.483541		5.23666e-06	0.00053375	0.483808	0.0299676
						-0.0493376	0	3.08279	0.324382	0.451348		4.61669e-06	0.00045683	0.451576	0.0308682													-0.397523	0.40201	3.05515	0.327317	0.494243		6.40495e-08	0.00045683	0.494471	0.000428249		-0.160261	0.245061	3.06632	0.326124	0.484075		5.24377e-06	0.000534473	0.484342	0.0299677
						-0.0497944	0	3.08275	0.324386	0.451804		4.61669e-06	0.00045683	0.452033	0.0308682													-0.397979	0.40201	3.05515	0.327317	0.4947		6.40495e-08	0.00045683	0.494928	0.000428249		-0.160718	0.245338	3.06627	0.326129	0.484609		5.15617e-06	0.000535206	0.484877	0.0294267
						-0.0502513	0	3.0827	0.324391	0.452261		4.47015e-06	0.00045683	0.45249	0.0298884													-0.398436	0.40201	3.05515	0.327317	0.495156		6.40495e-08	0.00045683	0.495385	0.000428249		-0.161175	0.245617	3.06622	0.326135	0.485144		5.14106e-06	0.000535907	0.485412	0.0293021
						-0.0507081	0	3.08266	0.324395	0.452718		4.47015e-06	0.00045683	0.452947	0.0298884													-0.398893	0.40201	3.05514	0.327317	0.495613		6.40495e-08	0.00045683	0.495842	0.000428249		-0.161632	0.245897	3.06617	0.32614	0.48568		5.14788e-06	0.000536608	0.485949	0.0293026
						-0.0511649	0	3.08262	0.3244	0.453175		4.47015e-06	0.00045683	0.453403	0.0298884													-0.39935	0.40201	3.05514	0.327317	0.49607		6.40495e-08	0.00045683	0.496299	0.000428249		-0.162089	0.246179	3.06612	0.326145	0.486217		5.1666e-06	0.000537317	0.486486	0.0293704
						-0.0516217	0	3.08257	0.324404	0.453632		4.47015e-06	0.00045683	0.45386	0.0298884													-0.399807	0.40201	3.05514	0.327317	0.496527		6.40495e-08	0.00045683	0.496755	0.000428249		-0.162545	0.246462	3.06607	0.32615	0.486754		5.17625e-06	0.00053803	0.487023	0.0293862
						-0.0520786	0	3.08253	0.324409	0.454089		4.47015e-06	0.00045683	0.454317	0.0298884													-0.400263	0.40201	3.05514	0.327317	0.496984		6.40495e-08	0.00045683	0.497212	0.000428249		-0.163002	0.246746	3.06603	0.326155	0.487292		5.18326e-06	0.00053875	0.487562	0.0293867
						-0.0525354	0	3.08249	0.324413	0.454545		4.47015e-06	0.00045683	0.454774	0.0298884													-0.40072	0.40201	3.05514	0.327317	0.497441		6.40495e-08	0.00045683	0.497669	0.000428249		-0.163459	0.247032	3.06598	0.32616	0.487831		5.19033e-06	0.00053948	0.488101	0.029387
						-0.0529922	0	3.08245	0.324418	0.455002		4.47015e-06	0.00045683	0.455231	0.0298884													-0.401177	0.40201	3.05514	0.327317	0.497897		6.40495e-08	0.00045683	0.498126	0.000428249		-0.163916	0.247318	3.06593	0.326166	0.488371		5.19746e-06	0.000540219	0.488641	0.0293871
						-0.0534491	0	3.0824	0.324422	0.455459		4.47015e-06	0.00045683	0.455688	0.0298884													-0.401634	0.40201	3.05514	0.327317	0.498354		5.27257e-08	0.00045683	0.498583	0.000352536		-0.164373	0.247607	3.06588	0.326171	0.488911		5.20466e-06	0.000540966	0.489181	0.0293871
						-0.0539059	0	3.08236	0.324426	0.455916		4.47015e-06	0.00045683	0.456144	0.0298884													-0.402091	0.40201	3.05514	0.327317	0.498811		0	8.07664e-05	0.498851	0		-0.16483	0.247897	3.06583	0.326176	0.489452		5.21192e-06	0.000541723	0.489723	0.029387
						-0.0543627	0	3.08232	0.324431	0.456373		4.47015e-06	0.00045683	0.456601	0.0298884													-0.40201	0.40201	3.05514	0.327317	0.498892							-0.165286	0.248188	3.06578	0.326181	0.489993		5.21924e-06	0.00054249	0.490265	0.0293867
						-0.0548196	0	3.08228	0.324435	0.45683		4.47015e-06	0.00045683	0.457058	0.0298884																								-0.165743	0.24848	3.06573	0.326186	0.490536		5.12653e-06	0.000543266	0.490808	0.0288235
						-0.0552764	0	3.08223	0.32444	0.457286		4.32482e-06	0.00045683	0.457515	0.0289167																								-0.1662	0.248774	3.06568	0.326192	0.491079		5.11037e-06	0.000544007	0.491351	0.0286935
						-0.0557332	0	3.08219	0.324444	0.457743		4.32482e-06	0.00045683	0.457972	0.0289167																								-0.166657	0.24907	3.06564	0.326197	0.491623		5.11737e-06	0.000544747	0.491896	0.0286938
						-0.05619	0	3.08215	0.324449	0.4582		4.32482e-06	0.00045683	0.458429	0.0289167																								-0.167114	0.249366	3.06559	0.326202	0.492168		5.12443e-06	0.000545496	0.492441	0.0286939
						-0.0566469	0	3.08211	0.324453	0.458657		4.32482e-06	0.00045683	0.458885	0.0289167																								-0.167571	0.249665	3.06554	0.326207	0.492713		5.13156e-06	0.000546253	0.492987	0.028694
						-0.0571037	0	3.08207	0.324457	0.459114		4.32482e-06	0.00045683	0.459342	0.0289167																								-0.168027	0.249964	3.06549	0.326212	0.49326		5.13874e-06	0.00054702	0.493533	0.0286939
						-0.0575605	0	3.08203	0.324462	0.459571		4.32482e-06	0.00045683	0.459799	0.0289167																								-0.168484	0.250265	3.06544	0.326217	0.493807		5.14599e-06	0.000547796	0.494081	0.0286936
						-0.0580174	0	3.08199	0.324466	0.460027		4.32482e-06	0.00045683	0.460256	0.0289167																								-0.168941	0.250567	3.06539	0.326222	0.494355		5.1533e-06	0.000548581	0.494629	0.0286933
						-0.0584742	0	3.08195	0.32447	0.460484		4.32482e-06	0.00045683	0.460713	0.0289167																								-0.169398	0.250871	3.06535	0.326227	0.494903		5.16067e-06	0.000549376	0.495178	0.0286928
						-0.058931	0	3.08191	0.324475	0.460941		4.32482e-06	0.00045683	0.461169	0.0289167																								-0.169855	0.251176	3.0653	0.326233	0.495453		5.17625e-06	0.00055018	0.495728	0.0287373
						-0.0593878	0	3.08187	0.324479	0.461398		4.32482e-06	0.00045683	0.461626	0.0289167																								-0.170312	0.251483	3.06525	0.326238	0.496003		5.18667e-06	0.000550992	0.496278	0.0287527
						-0.0598447	0	3.08182	0.324483	0.461855		4.32482e-06	0.00045683	0.462083	0.0289167																								-0.170768	0.251791	3.0652	0.326243	0.496554		5.08908e-06	0.000551814	0.49683	0.0281697
						-0.0603015	0	3.08178	0.324487	0.462312		4.18055e-06	0.00045683	0.46254	0.0279521																								-0.171225	0.2521	3.06515	0.326248	0.497105		5.07193e-06	0.000552596	0.497382	0.028035
						-0.0607583	0	3.08174	0.324492	0.462768		4.18055e-06	0.00045683	0.462997	0.0279521																								-0.171682	0.252411	3.0651	0.326253	0.497658		5.0791e-06	0.000553377	0.497935	0.0280351
						-0.0612152	0	3.0817	0.324496	0.463225		4.18055e-06	0.00045683	0.463454	0.0279521																								-0.172139	0.252724	3.06506	0.326258	0.498211		5.08634e-06	0.000554166	0.498489	0.028035
						-0.061672	0	3.08166	0.3245	0.463682		4.18055e-06	0.00045683	0.46391	0.0279521																								-0.172596	0.253037	3.06501	0.326263	0.498766		5.08399e-06	0.000554966	0.499043	0.0279817
						-0.0621288	0	3.08162	0.324504	0.464139		4.18055e-06	0.00045683	0.464367	0.0279521																								-0.173052	0.253352	3.06496	0.326268	0.499321		5.08776e-06	0.000555775	0.499598	0.0279617
						-0.0625857	0	3.08158	0.324508	0.464596		4.18055e-06	0.00045683	0.464824	0.0279521																								-0.173509	0.253669	3.06491	0.326273	0.499876		5.09534e-06	0.000556593	0.500155	0.0279621
						-0.0630425	0	3.08154	0.324513	0.465053		4.18055e-06	0.00045683	0.465281	0.0279521																								-0.173966	0.253987	3.06487	0.326279	0.500433		5.10298e-06	0.000557422	0.500712	0.0279624
						-0.0634993	0	3.08151	0.324517	0.465509		4.18055e-06	0.00045683	0.465738	0.0279521																								-0.174423	0.254306	3.06482	0.326284	0.50099		5.11069e-06	0.000558261	0.50127	0.0279626
						-0.0639561	0	3.08147	0.324521	0.465966		4.18055e-06	0.00045683	0.466195	0.0279521																								-0.17488	0.254627	3.06477	0.326289	0.501549		5.11848e-06	0.000559111	0.501828	0.0279627
						-0.064413	0	3.08143	0.324525	0.466423		4.18055e-06	0.00045683	0.466651	0.0279521																								-0.175337	0.254949	3.06472	0.326294	0.502108		5.12634e-06	0.000559971	0.502388	0.0279626
						-0.0648698	0	3.08139	0.324529	0.46688		4.18055e-06	0.00045683	0.467108	0.0279521																								-0.175793	0.255273	3.06467	0.326299	0.502668		5.02931e-06	0.000560842	0.502948	0.0273907
						-0.0653266	0	3.08135	0.324533	0.467337		4.03718e-06	0.00045683	0.467565	0.0269935																								-0.17625	0.255599	3.06463	0.326304	0.503229		5.0125e-06	0.000561669	0.503509	0.027259
						-0.0657835	0	3.08131	0.324538	0.467794		4.03718e-06	0.00045683	0.468022	0.0269935																								-0.176707	0.255925	3.06458	0.326309	0.50379		5.01996e-06	0.000562492	0.504071	0.0272596
						-0.0662403	0	3.08127	0.324542	0.46825		4.03718e-06	0.00045683	0.468479	0.0269935																								-0.177164	0.256254	3.06453	0.326314	0.504353		5.02939e-06	0.000563325	0.504634	0.0272704
						-0.0666971	0	3.08123	0.324546	0.468707		4.03718e-06	0.00045683	0.468936	0.0269935																								-0.177621	0.256583	3.06449	0.326319	0.504916		5.03716e-06	0.000564168	0.505198	0.0272717
						-0.067154	0	3.08119	0.32455	0.469164		4.03718e-06	0.00045683	0.469392	0.0269935																								-0.178078	0.256914	3.06444	0.326324	0.50548		5.04483e-06	0.000565021	0.505763	0.027272
						-0.0676108	0	3.08115	0.324554	0.469621		4.03718e-06	0.00045683	0.469849	0.0269935																								-0.178534	0.257247	3.06439	0.326329	0.506045		5.05257e-06	0.000565884	0.506328	0.0272722
						-0.0680676	0	3.08112	0.324558	0.470078		4.03718e-06	0.00045683	0.470306	0.0269935																								-0.178991	0.257581	3.06434	0.326334	0.506611		5.06038e-06	0.000566758	0.506895	0.0272722
						-0.0685244	0	3.08108	0.324562	0.470534		4.03718e-06	0.00045683	0.470763	0.0269935																								-0.179448	0.257916	3.0643	0.326339	0.507178		5.06827e-06	0.000567644	0.507462	0.0272722
						-0.0689813	0	3.08104	0.324566	0.470991		4.03718e-06	0.00045683	0.47122	0.0269935																								-0.179905	0.258253	3.06425	0.326344	0.507746		5.07624e-06	0.00056854	0.50803	0.027272
						-0.0694381	0	3.081	0.32457	0.471448		4.03718e-06	0.00045683	0.471677	0.0269935																								-0.180362	0.258592	3.0642	0.326349	0.508314		5.08428e-06	0.000569448	0.508599	0.0272716
						-0.0698949	0	3.08096	0.324574	0.471905		4.03718e-06	0.00045683	0.472133	0.0269935																								-0.180819	0.258932	3.06415	0.326355	0.508884		4.98327e-06	0.000570367	0.509169	0.0266867
						-0.0703518	0	3.08092	0.324578	0.472362		3.89456e-06	0.00045683	0.47259	0.0260399																								-0.181275	0.259273	3.06411	0.32636	0.509454		4.96565e-06	0.000571237	0.50974	0.0265519
						-0.0708086	0	3.08089	0.324582	0.472819		3.89456e-06	0.00045683	0.473047	0.0260399																								-0.181732	0.259616	3.06406	0.326364	0.510025		4.97326e-06	0.000572103	0.510311	0.0265523
						-0.0712654	0	3.08085	0.324586	0.473275		3.89456e-06	0.00045683	0.473504	0.0260399																								-0.182189	0.25996	3.06401	0.326369	0.510597		4.98094e-06	0.000572979	0.510884	0.0265526
						-0.0717222	0	3.08081	0.32459	0.473732		3.89456e-06	0.00045683	0.473961	0.0260399																								-0.182646	0.260306	3.06397	0.326374	0.51117		4.98869e-06	0.000573865	0.511457	0.0265529
						-0.0721791	0	3.08078	0.324593	0.474189		3.89456e-06	0.00045683	0.474418	0.0260399																								-0.183103	0.260654	3.06392	0.326379	0.511744		4.99651e-06	0.000574762	0.512031	0.026553
						-0.0726359	0	3.08074	0.324597	0.474646		3.89456e-06	0.00045683	0.474874	0.0260399																								-0.18356	0.261002	3.06387	0.326384	0.512319		5.0039e-06	0.000575671	0.512607	0.0265503
						-0.0730927	0	3.0807	0.324601	0.475103		3.89456e-06	0.00045683	0.475331	0.0260399																								-0.184016	0.261353	3.06382	0.326389	0.512895		5.00855e-06	0.00057659	0.513183	0.0265326
						-0.0735496	0	3.08067	0.324605	0.47556		3.89456e-06	0.00045683	0.475788	0.0260399																								-0.184473	0.261704	3.06378	0.326394	0.513471		5.0166e-06	0.000577524	0.51376	0.0265323
						-0.0740064	0	3.08063	0.324609	0.476016		3.89456e-06	0.00045683	0.476245	0.0260399																								-0.18493	0.262058	3.06373	0.326399	0.514049		5.02474e-06	0.000578469	0.514338	0.0265319
						-0.0744632	0	3.08059	0.324613	0.476473		3.89456e-06	0.00045683	0.476702	0.0260399																								-0.185387	0.262413	3.06368	0.326404	0.514627		5.03296e-06	0.000579427	0.514917	0.0265314
						-0.0749201	0	3.08056	0.324617	0.47693		3.89456e-06	0.00045683	0.477159	0.0260399																								-0.185844	0.262769	3.06364	0.326409	0.515207		4.92843e-06	0.000580397	0.515497	0.0259369
						-0.0753769	0	3.08052	0.324621	0.477387		3.75256e-06	0.00045683	0.477615	0.0250904																								-0.186301	0.263127	3.06359	0.326414	0.515787		4.9101e-06	0.000581312	0.516078	0.0257998
						-0.0758337	0	3.08048	0.324624	0.477844		3.75256e-06	0.00045683	0.478072	0.0250904																								-0.186757	0.263487	3.06354	0.326419	0.516368		4.91785e-06	0.000582222	0.516659	0.0258001
						-0.0762905	0	3.08045	0.324628	0.478301		3.75256e-06	0.00045683	0.478529	0.0250904																								-0.187214	0.263848	3.0635	0.326424	0.51695		4.92567e-06	0.000583143	0.517242	0.0258003
						-0.0767474	0	3.08041	0.324632	0.478757		3.75256e-06	0.00045683	0.478986	0.0250904																								-0.187671	0.26421	3.06345	0.326429	0.517534		4.93356e-06	0.000584075	0.517826	0.0258005
						-0.0772042	0	3.08038	0.324636	0.479214		3.75256e-06	0.00045683	0.479443	0.0250904																								-0.188128	0.264574	3.06341	0.326434	0.518118		4.94153e-06	0.000585018	0.51841	0.0258005
						-0.077661	0	3.08034	0.324639	0.479671		3.75256e-06	0.00045683	0.479899	0.0250904																								-0.188585	0.264939	3.06336	0.326439	0.518703		4.94958e-06	0.000585973	0.518996	0.0258004
						-0.0781179	0	3.0803	0.324643	0.480128		3.75256e-06	0.00045683	0.480356	0.0250904																								-0.189042	0.265306	3.06331	0.326444	0.519289		4.95771e-06	0.00058694	0.519582	0.0258002
						-0.0785747	0	3.08027	0.324647	0.480585		3.75256e-06	0.00045683	0.480813	0.0250904																								-0.189498	0.265675	3.06327	0.326449	0.519876		4.96592e-06	0.000587919	0.52017	0.0257999
						-0.0790315	0	3.08023	0.324651	0.481042		3.75256e-06	0.00045683	0.48127	0.0250904																								-0.189955	0.266045	3.06322	0.326454	0.520464		4.97181e-06	0.000588911	0.520758	0.025787
						-0.0794884	0	3.0802	0.324654	0.481498		3.75256e-06	0.00045683	0.481727	0.0250904																								-0.190412	0.266417	3.06317	0.326459	0.521052		4.97203e-06	0.000589916	0.521347	0.0257442
						-0.0799452	0	3.08016	0.324658	0.481955		3.75256e-06	0.00045683	0.482184	0.0250904																								-0.190869	0.26679	3.06313	0.326464	0.521642		4.86453e-06	0.00059094	0.521938	0.0251439
						-0.080402	0	3.08013	0.324662	0.482412		3.61101e-06	0.00045683	0.48264	0.024144																								-0.191326	0.267165	3.06308	0.326469	0.522233		4.8456e-06	0.000591902	0.522529	0.0250054
						-0.0808588	0	3.08009	0.324666	0.482869		3.61101e-06	0.00045683	0.483097	0.024144																								-0.191782	0.267541	3.06303	0.326474	0.522825		4.85348e-06	0.000592858	0.523122	0.0250056
						-0.0813157	0	3.08006	0.324669	0.483326		3.61101e-06	0.00045683	0.483554	0.024144																								-0.192239	0.267919	3.06299	0.326478	0.523418		4.86143e-06	0.000593826	0.523715	0.0250058
						-0.0817725	0	3.08002	0.324673	0.483783		3.61101e-06	0.00045683	0.484011	0.024144																								-0.192696	0.268298	3.06294	0.326483	0.524012		4.86946e-06	0.000594806	0.524309	0.0250058
						-0.0822293	0	3.07999	0.324676	0.484239		3.61101e-06	0.00045683	0.484468	0.024144																								-0.193153	0.268679	3.0629	0.326488	0.524607		4.87758e-06	0.000595798	0.524905	0.0250058
						-0.0826862	0	3.07996	0.32468	0.484696		3.61101e-06	0.00045683	0.484925	0.024144																								-0.19361	0.269062	3.06285	0.326493	0.525202		4.88577e-06	0.000596803	0.525501	0.0250056
						-0.083143	0	3.07992	0.324684	0.485153		3.61101e-06	0.00045683	0.485381	0.024144																								-0.194067	0.269446	3.06281	0.326498	0.525799		4.89104e-06	0.00059782	0.526098	0.02499
						-0.0835998	0	3.07989	0.324687	0.48561		3.61101e-06	0.00045683	0.485838	0.024144																								-0.194523	0.269831	3.06276	0.326503	0.526397		4.89938e-06	0.00059885	0.526697	0.0249895
						-0.0840566	0	3.07985	0.324691	0.486067		3.61101e-06	0.00045683	0.486295	0.024144																								-0.19498	0.270219	3.06271	0.326508	0.526996		4.9079e-06	0.000599894	0.527296	0.0249895
						-0.0845135	0	3.07982	0.324694	0.486524		3.61101e-06	0.00045683	0.486752	0.024144																								-0.195437	0.270607	3.06267	0.326513	0.527596		4.91652e-06	0.000600951	0.527896	0.0249893
						-0.0849703	0	3.07978	0.324698	0.48698		3.61101e-06	0.00045683	0.487209	0.024144																								-0.195894	0.270998	3.06262	0.326518	0.528197		4.80962e-06	0.000602021	0.528498	0.0244025
						-0.0854271	0	3.07975	0.324702	0.487437		3.46977e-06	0.00045683	0.487666	0.0231996																								-0.196351	0.27139	3.06258	0.326522	0.528799		4.77016e-06	0.000603023	0.5291	0.024162
						-0.085884	0	3.07972	0.324705	0.487894		3.46977e-06	0.00045683	0.488122	0.0231996																								-0.196808	0.271784	3.06253	0.326527	0.529402		4.7782e-06	0.000604029	0.529704	0.0241625
						-0.0863408	0	3.07968	0.324709	0.488351		3.46977e-06	0.00045683	0.488579	0.0231996																								-0.197264	0.272179	3.06249	0.326532	0.530006		4.78633e-06	0.000605046	0.530308	0.0241629
						-0.0867976	0	3.07965	0.324712	0.488808		3.46977e-06	0.00045683	0.489036	0.0231996																								-0.197721	0.272575	3.06244	0.326537	0.530611		4.79453e-06	0.000606077	0.530914	0.0241632
						-0.0872545	0	3.07962	0.324716	0.489265		3.46977e-06	0.00045683	0.489493	0.0231996																								-0.198178	0.272974	3.0624	0.326541	0.531217		4.80283e-06	0.000607121	0.531521	0.0241634
						-0.0877113	0	3.07959	0.324719	0.489721		3.46977e-06	0.00045683	0.48995	0.0231996																								-0.198635	0.273374	3.06235	0.326546	0.531824		4.81121e-06	0.000608178	0.532128	0.0241635
						-0.0881681	0	3.07955	0.324723	0.490178		3.46977e-06	0.00045683	0.490407	0.0231996																								-0.199092	0.273775	3.06231	0.326551	0.532432		4.81968e-06	0.000609249	0.532737	0.0241635
						-0.0886249	0	3.07952	0.324726	0.490635		3.46977e-06	0.00045683	0.490863	0.0231996																								-0.199549	0.274178	3.06226	0.326556	0.533042		4.82824e-06	0.000610333	0.533347	0.0241634
						-0.0890818	0	3.07949	0.324729	0.491092		3.46977e-06	0.00045683	0.49132	0.0231996																								-0.200005	0.274583	3.06222	0.326561	0.533652		4.8369e-06	0.000611432	0.533958	0.0241632
						-0.0895386	0	3.07945	0.324733	0.491549		3.46977e-06	0.00045683	0.491777	0.0231996																								-0.200462	0.274989	3.06217	0.326566	0.534263		4.84564e-06	0.000612545	0.53457	0.0241629
						-0.0899954	0	3.07942	0.324736	0.492005		3.46977e-06	0.00045683	0.492234	0.0231996																								-0.200919	0.275397	3.06213	0.32657	0.534876		4.73886e-06	0.000613673	0.535183	0.023587
						-0.0904523	0	3.07939	0.32474	0.492462		3.32868e-06	0.00045683	0.492691	0.0222563																								-0.201376	0.275807	3.06208	0.326575	0.53549		4.72029e-06	0.000614724	0.535797	0.0234544
						-0.0909091	0	3.07936	0.324743	0.492919		3.32868e-06	0.00045683	0.493148	0.0222563																								-0.201833	0.276218	3.06204	0.32658	0.536104		4.70946e-06	0.000615765	0.536412	0.023361
						-0.0913659	0	3.07932	0.324747	0.493376		3.32868e-06	0.00045683	0.493604	0.0222563																								-0.20229	0.276631	3.06199	0.326585	0.53672		4.70521e-06	0.00061683	0.537028	0.0232996
						-0.0918228	0	3.07929	0.32475	0.493833		3.32868e-06	0.00045683	0.494061	0.0222563																								-0.202746	0.277046	3.06195	0.326589	0.537337		4.71352e-06	0.000617915	0.537646	0.0232998
						-0.0922796	0	3.07926	0.324753	0.49429		3.32868e-06	0.00045683	0.494518	0.0222563																								-0.203203	0.277462	3.06191	0.326594	0.537955		4.72192e-06	0.000619014	0.538264	0.0232999
						-0.0927364	0	3.07923	0.324757	0.494746		3.32868e-06	0.00045683	0.494975	0.0222563																								-0.20366	0.27788	3.06186	0.326599	0.538574		4.73041e-06	0.000620127	0.538884	0.0232999
						-0.0931932	0	3.0792	0.32476	0.495203		3.32868e-06	0.00045683	0.495432	0.0222563																								-0.204117	0.278299	3.06182	0.326603	0.539194		4.73899e-06	0.000621255	0.539505	0.0232998
						-0.0936501	0	3.07917	0.324763	0.49566		3.32868e-06	0.00045683	0.495889	0.0222563																								-0.204574	0.27872	3.06177	0.326608	0.539815		4.74767e-06	0.000622397	0.540126	0.0232996
						-0.0941069	0	3.07914	0.324767	0.496117		3.32868e-06	0.00045683	0.496345	0.0222563																								-0.205031	0.279143	3.06173	0.326613	0.540438		4.75645e-06	0.000623555	0.540749	0.0232993
						-0.0945637	0	3.0791	0.32477	0.496574		3.32868e-06	0.00045683	0.496802	0.0222563																								-0.205487	0.279567	3.06168	0.326618	0.541061		4.76532e-06	0.000624729	0.541373	0.0232989
						-0.0950206	0	3.07907	0.324773	0.497031		3.32868e-06	0.00045683	0.497259	0.0222563																								-0.205944	0.279993	3.06164	0.326622	0.541686		4.65735e-06	0.000625918	0.541999	0.0227278
						-0.0954774	0	3.07904	0.324776	0.497487		3.18758e-06	0.00045683	0.497716	0.0213129																								-0.206401	0.280421	3.0616	0.326627	0.542312		4.63857e-06	0.000627022	0.542625	0.0225963
						-0.0959342	0	3.07901	0.32478	0.497944		3.18758e-06	0.00045683	0.498173	0.0213129																								-0.206858	0.280851	3.06155	0.326632	0.542939		4.64678e-06	0.000628114	0.543253	0.0225969
						-0.096391	0	3.07898	0.324783	0.498401		3.18758e-06	0.00045683	0.49863	0.0213129																								-0.207315	0.281282	3.06151	0.326636	0.543567		4.62663e-06	0.00062922	0.543881	0.0224593
						-0.0968479	0	3.07895	0.324786	0.498858		3.18758e-06	0.00045683	0.499086	0.0213129																								-0.207772	0.281714	3.06146	0.326641	0.544196		4.62338e-06	0.000630357	0.544511	0.0224031
						-0.0973047	0	3.07892	0.324789	0.499315		3.18758e-06	0.00045683	0.499543	0.0213129																								-0.208228	0.282149	3.06142	0.326646	0.544826		4.63188e-06	0.000631516	0.545142	0.0224031
						-0.0977615	0	3.07889	0.324792	0.499772		3.18758e-06	0.00045683	0.5	0.0213129																								-0.208685	0.282585	3.06138	0.32665	0.545458		4.64048e-06	0.00063269	0.545774	0.0224031
						-0.0982184	0	3.07886	0.324796	0.500228		3.18758e-06	0.00045683	0.500457	0.0213129																								-0.209142	0.283022	3.06133	0.326655	0.546091		4.64917e-06	0.000633879	0.546408	0.0224029
						-0.0986752	0	3.07883	0.324799	0.500685		3.18758e-06	0.00045683	0.500914	0.0213129																								-0.209599	0.283462	3.06129	0.32666	0.546725		4.65796e-06	0.000635084	0.547042	0.0224026
						-0.099132	0	3.0788	0.324802	0.501142		3.18758e-06	0.00045683	0.50137	0.0213129																								-0.210056	0.283903	3.06125	0.326664	0.54736		4.66685e-06	0.000636306	0.547678	0.0224023
						-0.0995889	0	3.07877	0.324805	0.501599		3.18758e-06	0.00045683	0.501827	0.0213129																								-0.210513	0.284346	3.0612	0.326669	0.547996		4.67584e-06	0.000637545	0.548315	0.0224019
						-0.100046	0	3.07874	0.324808	0.502056		3.18758e-06	0.00045683	0.502284	0.0213129																								-0.210969	0.284791	3.06116	0.326674	0.548633		4.56737e-06	0.0006388	0.548953	0.0218392
						-0.100503	0	3.07871	0.324812	0.502513		3.04632e-06	0.00045683	0.502741	0.0203684																								-0.211426	0.285237	3.06112	0.326678	0.549272		4.54852e-06	0.00063996	0.549592	0.0217096
						-0.100959	0	3.07868	0.324815	0.502969		3.04632e-06	0.00045683	0.503198	0.0203684																								-0.211883	0.285685	3.06107	0.326683	0.549912		4.55681e-06	0.000641108	0.550233	0.0217102
						-0.101416	0	3.07865	0.324818	0.503426		3.04632e-06	0.00045683	0.503655	0.0203684																								-0.21234	0.286135	3.06103	0.326687	0.550553		4.54844e-06	0.000642271	0.550874	0.0216311
						-0.101873	0	3.07862	0.324821	0.503883		3.04632e-06	0.00045683	0.504111	0.0203684																								-0.212797	0.286587	3.06099	0.326692	0.551196		4.52461e-06	0.000643458	0.551517	0.0214781
						-0.10233	0	3.07859	0.324824	0.50434		3.04632e-06	0.00045683	0.504568	0.0203684																								-0.213253	0.28704	3.06095	0.326696	0.551839		4.53321e-06	0.000644681	0.552161	0.0214781
						-0.102787	0	3.07856	0.324827	0.504797		3.04632e-06	0.00045683	0.505025	0.0203684																								-0.21371	0.287495	3.0609	0.326701	0.552484		4.5419e-06	0.00064592	0.552807	0.021478
						-0.103243	0	3.07853	0.32483	0.505254		3.04632e-06	0.00045683	0.505482	0.0203684																								-0.214167	0.287951	3.06086	0.326705	0.55313		4.53495e-06	0.000644938	0.553452	0.0214778
						-0.1037	0	3.07851	0.324833	0.50571		3.04632e-06	0.00045683	0.505939	0.0203684																								-0.214622	0.288408	3.06082	0.32671	0.553775		4.52611e-06	0.00064369	0.554096	0.0214775
						-0.104157	0	3.07848	0.324836	0.506167		3.04632e-06	0.00045683	0.506396	0.0203684																								-0.215076	0.288865	3.06078	0.326714	0.554418		4.51727e-06	0.000642444	0.55474	0.0214771
						-0.104614	0	3.07845	0.324839	0.506624		3.04632e-06	0.00045683	0.506852	0.0203684																								-0.215528	0.289322	3.06073	0.326719	0.555061		4.50843e-06	0.0006412	0.555381	0.0214767
						-0.105071	0	3.07842	0.324842	0.507081		3.04632e-06	0.00045683	0.507309	0.0203684																								-0.215978	0.289779	3.06069	0.326723	0.555702		4.39022e-06	0.000639959	0.556022	0.0209541
						-0.105528	0	3.07839	0.324845	0.507538		2.90471e-06	0.00045683	0.507766	0.0194215																								-0.216426	0.290236	3.06065	0.326728	0.556342		4.35007e-06	0.000638828	0.556661	0.0207993
						-0.105984	0	3.07836	0.324848	0.507995		2.90471e-06	0.00045683	0.508223	0.0194215																								-0.216872	0.290692	3.06061	0.326732	0.556981		4.34274e-06	0.000637732	0.5573	0.0207999
						-0.106441	0	3.07834	0.324851	0.508451		2.90471e-06	0.00045683	0.50868	0.0194215																								-0.217317	0.291149	3.06057	0.326737	0.557618		4.31707e-06	0.000636639	0.557937	0.0207124
						-0.106898	0	3.07831	0.324854	0.508908		2.90471e-06	0.00045683	0.509137	0.0194215																								-0.217761	0.291606	3.06053	0.326741	0.558255		4.27168e-06	0.000635536	0.558573	0.0205302
						-0.107355	0	3.07828	0.324857	0.509365		2.90471e-06	0.00045683	0.509593	0.0194215																								-0.218202	0.292063	3.06049	0.326745	0.558891		4.26411e-06	0.000634413	0.559208	0.0205302
						-0.107812	0	3.07825	0.32486	0.509822		2.90471e-06	0.00045683	0.51005	0.0194215																								-0.218643	0.29252	3.06045	0.326749	0.559525		4.25655e-06	0.000633291	0.559842	0.02053
						-0.108269	0	3.07823	0.324862	0.510279		2.90471e-06	0.00045683	0.510507	0.0194215																								-0.219081	0.292977	3.06041	0.326754	0.560158		4.24898e-06	0.000632171	0.560474	0.0205298
						-0.108725	0	3.0782	0.324865	0.510735		2.90471e-06	0.00045683	0.510964	0.0194215																								-0.219518	0.293433	3.06037	0.326758	0.560791		4.24141e-06	0.000631053	0.561106	0.0205296
						-0.109182	0	3.07817	0.324868	0.511192		2.90471e-06	0.00045683	0.511421	0.0194215																								-0.219954	0.29389	3.06033	0.326762	0.561422		4.23384e-06	0.000629937	0.561737	0.0205292
						-0.109639	0	3.07814	0.324871	0.511649		2.90471e-06	0.00045683	0.511878	0.0194215																								-0.220387	0.294347	3.06029	0.326766	0.562052		4.22627e-06	0.000628823	0.562366	0.0205288
						-0.110096	0	3.07812	0.324874	0.512106		2.90471e-06	0.00045683	0.512334	0.0194215																								-0.220819	0.294804	3.06025	0.326771	0.56268		4.17326e-06	0.000627711	0.562994	0.0203072
						-0.110553	0	3.07809	0.324877	0.512563		2.76257e-06	0.00045683	0.512791	0.0184712																								-0.22125	0.295261	3.06021	0.326775	0.563308		4.07647e-06	0.000626644	0.563621	0.01987
						-0.11101	0	3.07806	0.32488	0.51302		2.76257e-06	0.00045683	0.513248	0.0184712																								-0.221679	0.295717	3.06017	0.326779	0.563935		4.07023e-06	0.000625666	0.564248	0.0198707
						-0.111466	0	3.07804	0.324883	0.513476		2.76257e-06	0.00045683	0.513705	0.0184712																								-0.222106	0.296174	3.06014	0.326783	0.56456		4.04361e-06	0.00062469	0.564873	0.0197715
						-0.111923	0	3.07801	0.324885	0.513933		2.76257e-06	0.00045683	0.514162	0.0184712																								-0.222532	0.296631	3.0601	0.326787	0.565185		3.99506e-06	0.000623704	0.565497	0.019565
						-0.11238	0	3.07798	0.324888	0.51439		2.76257e-06	0.00045683	0.514619	0.0184712																								-0.222957	0.297088	3.06006	0.326791	0.565809		3.98859e-06	0.000622695	0.56612	0.019565
						-0.112837	0	3.07796	0.324891	0.514847		2.76257e-06	0.00045683	0.515075	0.0184712																								-0.22338	0.297545	3.06002	0.326795	0.566431		3.98212e-06	0.000621688	0.566742	0.0195649
						-0.113294	0	3.07793	0.324894	0.515304		2.76257e-06	0.00045683	0.515532	0.0184712																								-0.223802	0.298002	3.05999	0.326799	0.567053		3.97565e-06	0.000620683	0.567363	0.0195647
						-0.113751	0	3.0779	0.324896	0.515761		2.76257e-06	0.00045683	0.515989	0.0184712																								-0.224222	0.298458	3.05995	0.326803	0.567674		3.96918e-06	0.000619679	0.567984	0.0195645
						-0.114207	0	3.07788	0.324899	0.516217		2.76257e-06	0.00045683	0.516446	0.0184712																								-0.224641	0.298915	3.05991	0.326807	0.568293		3.9627e-06	0.000618676	0.568603	0.0195642
						-0.114664	0	3.07785	0.324902	0.516674		2.76257e-06	0.00045683	0.516903	0.0184712																								-0.225058	0.299372	3.05987	0.326811	0.568912		3.95622e-06	0.000617675	0.569221	0.0195639
						-0.115121	0	3.07783	0.324905	0.517131		2.76257e-06	0.00045683	0.51736	0.0184712																								-0.225474	0.299829	3.05984	0.326815	0.56953		3.94973e-06	0.000616675	0.569838	0.0195635
						-0.115578	0	3.0778	0.324907	0.517588		2.61971e-06	0.00045683	0.517816	0.017516																								-0.225888	0.300286	3.0598	0.326819	0.570147		3.89042e-06	0.000615676	0.570454	0.019301
						-0.116035	0	3.07778	0.32491	0.518045		2.61971e-06	0.00045683	0.518273	0.017516																								-0.226301	0.300743	3.05976	0.326823	0.570762		3.80935e-06	0.000614729	0.57107	0.0189279
						-0.116492	0	3.07775	0.324913	0.518502		2.61971e-06	0.00045683	0.51873	0.017516																								-0.226712	0.301199	3.05973	0.326826	0.571377		3.78179e-06	0.000613855	0.571684	0.0188177
						-0.116948	0	3.07773	0.324915	0.518958		2.61971e-06	0.00045683	0.519187	0.017516																								-0.227122	0.301656	3.05969	0.32683	0.571991		3.7303e-06	0.00061297	0.572297	0.0185883
						-0.117405	0	3.0777	0.324918	0.519415		2.61971e-06	0.00045683	0.519644	0.017516																								-0.227531	0.302113	3.05966	0.326834	0.572604		3.72479e-06	0.000612063	0.57291	0.0185883
						-0.117862	0	3.07768	0.324921	0.519872		2.61971e-06	0.00045683	0.520101	0.017516																								-0.227938	0.30257	3.05962	0.326838	0.573216		3.71926e-06	0.000611157	0.573521	0.0185883
						-0.118319	0	3.07765	0.324923	0.520329		2.61971e-06	0.00045683	0.520557	0.017516																								-0.228344	0.303027	3.05959	0.326841	0.573827		3.71374e-06	0.000610252	0.574132	0.0185882
						-0.118776	0	3.07763	0.324926	0.520786		2.61971e-06	0.00045683	0.521014	0.017516																								-0.228749	0.303484	3.05955	0.326845	0.574437		3.70821e-06	0.000609348	0.574742	0.0185881
						-0.119233	0	3.0776	0.324928	0.521243		2.61971e-06	0.00045683	0.521471	0.017516																								-0.229152	0.30394	3.05952	0.326849	0.575047		3.70268e-06	0.000608444	0.575351	0.0185879
						-0.119689	0	3.07758	0.324931	0.521699		2.61971e-06	0.00045683	0.521928	0.017516																								-0.229554	0.304397	3.05948	0.326853	0.575655		3.69714e-06	0.000607542	0.575959	0.0185877
						-0.120146	0	3.07755	0.324934	0.522156		2.61971e-06	0.00045683	0.522385	0.017516																								-0.229954	0.304854	3.05945	0.326856	0.576263		3.6916e-06	0.000606641	0.576566	0.0185874
						-0.120603	0	3.07753	0.324936	0.522613		2.47591e-06	0.00045683	0.522841	0.0165545																								-0.230354	0.305311	3.05941	0.32686	0.576869		3.68605e-06	0.000605741	0.577172	0.018587
						-0.12106	0	3.0775	0.324939	0.52307		2.47591e-06	0.00045683	0.523298	0.0165545																								-0.230751	0.305768	3.05938	0.326864	0.577475		3.6805e-06	0.000604842	0.577777	0.0185866
						-0.121517	0	3.07748	0.324941	0.523527		2.47591e-06	0.00045683	0.523755	0.0165545																								-0.231148	0.306225	3.05935	0.326867	0.57808		3.53313e-06	0.000603944	0.578382	0.0178689
						-0.121974	0	3.07746	0.324944	0.523984		2.47591e-06	0.00045683	0.524212	0.0165545																								-0.231543	0.306681	3.05931	0.326871	0.578684		3.47654e-06	0.000603147	0.578985	0.017606
						-0.12243	0	3.07743	0.324946	0.52444		2.47591e-06	0.00045683	0.524669	0.0165545																								-0.231937	0.307138	3.05928	0.326874	0.579287		3.47184e-06	0.000602328	0.579588	0.0176061
						-0.122887	0	3.07741	0.324949	0.524897		2.47591e-06	0.00045683	0.525126	0.0165545																								-0.232329	0.307595	3.05925	0.326878	0.579889		3.46714e-06	0.000601511	0.58019	0.0176061
						-0.123344	0	3.07739	0.324951	0.525354		2.47591e-06	0.00045683	0.525582	0.0165545																								-0.23272	0.308052	3.05921	0.326881	0.580491		3.46337e-06	0.000600694	0.580791	0.0176109
						-0.123801	0	3.07736	0.324954	0.525811		2.47591e-06	0.00045683	0.526039	0.0165545																								-0.233111	0.308509	3.05918	0.326885	0.581091		3.46073e-06	0.000599878	0.581391	0.0176214
						-0.124258	0	3.07734	0.324956	0.526268		2.47591e-06	0.00045683	0.526496	0.0165545																								-0.233499	0.308966	3.05915	0.326888	0.581691		3.45608e-06	0.000599064	0.581991	0.0176216
						-0.124714	0	3.07732	0.324959	0.526725		2.47591e-06	0.00045683	0.526953	0.0165545																								-0.233887	0.309422	3.05912	0.326892	0.58229		3.45141e-06	0.00059825	0.582589	0.0176218
						-0.125171	0	3.07729	0.324961	0.527181		2.47591e-06	0.00045683	0.52741	0.0165545																								-0.234273	0.309879	3.05909	0.326895	0.582889		3.44675e-06	0.000597436	0.583187	0.0176219
						-0.125628	0	3.07727	0.324963	0.527638		2.33097e-06	0.00045683	0.527867	0.0155854																								-0.234658	0.310336	3.05905	0.326899	0.583486		3.44207e-06	0.000596624	0.583784	0.017622
						-0.126085	0	3.07725	0.324966	0.528095		2.33097e-06	0.00045683	0.528323	0.0155854																								-0.235042	0.310793	3.05902	0.326902	0.584083		3.4374e-06	0.000595812	0.584381	0.017622
						-0.126542	0	3.07722	0.324968	0.528552		2.33097e-06	0.00045683	0.52878	0.0155854																								-0.235424	0.31125	3.05899	0.326905	0.584678		3.40837e-06	0.000595001	0.584976	0.017497
						-0.126999	0	3.0772	0.32497	0.529009		2.33097e-06	0.00045683	0.529237	0.0155854																								-0.235806	0.311707	3.05896	0.326909	0.585273		3.35177e-06	0.000594179	0.585571	0.0172302
						-0.127455	0	3.07718	0.324973	0.529466		2.33097e-06	0.00045683	0.529694	0.0155854																								-0.236186	0.312163	3.05893	0.326912	0.585868		3.23323e-06	0.000593335	0.586164	0.0166446
						-0.127912	0	3.07716	0.324975	0.529922		2.33097e-06	0.00045683	0.530151	0.0155854																								-0.236564	0.31262	3.0589	0.326915	0.586461		3.22929e-06	0.000592596	0.586757	0.016645
						-0.128369	0	3.07714	0.324977	0.530379		2.33097e-06	0.00045683	0.530608	0.0155854																								-0.236942	0.313077	3.05886	0.326919	0.587054		3.22535e-06	0.000591858	0.58735	0.0166454
						-0.128826	0	3.07711	0.32498	0.530836		2.33097e-06	0.00045683	0.531064	0.0155854																								-0.237318	0.313534	3.05883	0.326922	0.587645		3.22141e-06	0.000591121	0.587941	0.0166458
						-0.129283	0	3.07709	0.324982	0.531293		2.33097e-06	0.00045683	0.531521	0.0155854																								-0.237693	0.313991	3.0588	0.326925	0.588237		3.21746e-06	0.000590385	0.588532	0.0166462
						-0.12974	0	3.07707	0.324984	0.53175		2.33097e-06	0.00045683	0.531978	0.0155854																								-0.238067	0.314447	3.05877	0.326928	0.588827		3.21352e-06	0.000589649	0.589122	0.0166465
						-0.130196	0	3.07705	0.324987	0.532206		2.33097e-06	0.00045683	0.532435	0.0155854																								-0.23844	0.314904	3.05874	0.326932	0.589417		3.20956e-06	0.000588914	0.589711	0.0166467
						-0.130653	0	3.07703	0.324989	0.532663		2.18463e-06	0.00045683	0.532892	0.0146069																								-0.238812	0.315361	3.05871	0.326935	0.590006		3.2056e-06	0.00058818	0.5903	0.016647
						-0.13111	0	3.07701	0.324991	0.53312		2.18463e-06	0.00045683	0.533349	0.0146069																								-0.239182	0.315818	3.05868	0.326938	0.590594		3.20164e-06	0.000587446	0.590887	0.0166472
						-0.131567	0	3.07698	0.324993	0.533577		2.18463e-06	0.00045683	0.533805	0.0146069																								-0.239551	0.316275	3.05865	0.326941	0.591181		3.17195e-06	0.000586713	0.591474	0.0165133
						-0.132024	0	3.07696	0.324996	0.534034		2.18463e-06	0.00045683	0.534262	0.0146069																								-0.239919	0.316732	3.05862	0.326944	0.591768		3.11461e-06	0.000585969	0.592061	0.0162354
						-0.132481	0	3.07694	0.324998	0.534491		2.18463e-06	0.00045683	0.534719	0.0146069																								-0.240286	0.317188	3.0586	0.326947	0.592354		3.11044e-06	0.000585202	0.592646	0.016235
						-0.132937	0	3.07692	0.325	0.534947		2.18463e-06	0.00045683	0.535176	0.0146069																								-0.240652	0.317645	3.05857	0.326951	0.592939		3.10626e-06	0.000584435	0.593231	0.0162344
						-0.133394	0	3.0769	0.325002	0.535404		2.18463e-06	0.00045683	0.535633	0.0146069																								-0.241017	0.318102	3.05854	0.326954	0.593523		3.05102e-06	0.000583668	0.593815	0.0159667
						-0.133851	0	3.07688	0.325004	0.535861		2.18463e-06	0.00045683	0.53609	0.0146069																								-0.24138	0.318559	3.05851	0.326957	0.594107		2.99187e-06	0.000582949	0.594399	0.0156765
						-0.134308	0	3.07686	0.325007	0.536318		2.18463e-06	0.00045683	0.536546	0.0146069																								-0.241742	0.319016	3.05848	0.32696	0.59469		2.98854e-06	0.000582283	0.594981	0.0156769
						-0.134765	0	3.07684	0.325009	0.536775		2.18463e-06	0.00045683	0.537003	0.0146069																								-0.242103	0.319473	3.05845	0.326963	0.595272		2.9852e-06	0.000581617	0.595563	0.0156773
						-0.135222	0	3.07682	0.325011	0.537232		2.18463e-06	0.00045683	0.53746	0.0146069																								-0.242463	0.319929	3.05843	0.326966	0.595854		2.98187e-06	0.000580952	0.596144	0.0156777
						-0.135678	0	3.0768	0.325013	0.537688		2.03663e-06	0.00045683	0.537917	0.0136174																								-0.242822	0.320386	3.0584	0.326969	0.596435		2.97852e-06	0.000580288	0.596725	0.0156781
						-0.136135	0	3.07678	0.325015	0.538145		2.03663e-06	0.00045683	0.538374	0.0136174																								-0.24318	0.320843	3.05837	0.326972	0.597015		2.97518e-06	0.000579624	0.597305	0.0156784
						-0.136592	0	3.07676	0.325017	0.538602		2.03663e-06	0.00045683	0.538831	0.0136174																								-0.243537	0.3213	3.05834	0.326975	0.597595		2.94495e-06	0.000578961	0.597884	0.0155369
						-0.137049	0	3.07674	0.325019	0.539059		2.03663e-06	0.00045683	0.539287	0.0136174																								-0.243892	0.321757	3.05831	0.326978	0.598174		2.88585e-06	0.000578287	0.598463	0.0152428
						-0.137506	0	3.07672	0.325021	0.539516		2.03663e-06	0.00045683	0.539744	0.0136174																								-0.244247	0.322214	3.05829	0.32698	0.598752		2.88232e-06	0.00057759	0.599041	0.0152425
						-0.137963	0	3.0767	0.325023	0.539973		2.03663e-06	0.00045683	0.540201	0.0136174																								-0.2446	0.32267	3.05826	0.326983	0.59933		2.87878e-06	0.000576893	0.599618	0.0152422
						-0.138419	0	3.07668	0.325025	0.540429		2.03663e-06	0.00045683	0.540658	0.0136174																								-0.244953	0.323127	3.05823	0.326986	0.599907		2.87523e-06	0.000576197	0.600195	0.0152418
						-0.138876	0	3.07666	0.325027	0.540886		2.03663e-06	0.00045683	0.541115	0.0136174																								-0.245304	0.323584	3.05821	0.326989	0.600483		2.87169e-06	0.000575501	0.600771	0.0152414
						-0.139333	0	3.07664	0.325029	0.541343		2.03663e-06	0.00045683	0.541571	0.0136174																								-0.245654	0.324041	3.05818	0.326992	0.601058		2.86813e-06	0.000574806	0.601346	0.015241
						-0.13979	0	3.07663	0.325031	0.5418		2.03663e-06	0.00045683	0.542028	0.0136174																								-0.246003	0.324498	3.05815	0.326995	0.601633		2.83099e-06	0.000574111	0.60192	0.0150619
						-0.140247	0	3.07661	0.325034	0.542257		2.03663e-06	0.00045683	0.542485	0.0136174																								-0.24635	0.324955	3.05813	0.326998	0.602207		2.76355e-06	0.000573448	0.602494	0.01472
						-0.140704	0	3.07659	0.325036	0.542714		1.8867e-06	0.00045683	0.542942	0.0126149																								-0.246697	0.325411	3.0581	0.327	0.602781		2.76074e-06	0.000572846	0.603067	0.0147205
						-0.14116	0	3.07657	0.325037	0.54317		1.8867e-06	0.00045683	0.543399	0.0126149																								-0.247043	0.325868	3.05807	0.327003	0.603353		2.75792e-06	0.000572245	0.60364	0.0147209
						-0.141617	0	3.07655	0.325039	0.543627		1.8867e-06	0.00045683	0.543856	0.0126149																								-0.247387	0.326325	3.05805	0.327006	0.603926		2.72731e-06	0.000571645	0.604212	0.0145728
						-0.142074	0	3.07653	0.325041	0.544084		1.8867e-06	0.00045683	0.544312	0.0126149																								-0.247731	0.326782	3.05802	0.327009	0.604497		2.66685e-06	0.000571034	0.604783	0.014265
						-0.142531	0	3.07652	0.325043	0.544541		1.8867e-06	0.00045683	0.544769	0.0126149																								-0.248074	0.327239	3.058	0.327011	0.605068		2.66387e-06	0.0005704	0.605354	0.0142649
						-0.142988	0	3.0765	0.325045	0.544998		1.8867e-06	0.00045683	0.545226	0.0126149																								-0.248415	0.327696	3.05797	0.327014	0.605639		2.66088e-06	0.000569767	0.605924	0.0142647
						-0.143444	0	3.07648	0.325047	0.545455		1.8867e-06	0.00045683	0.545683	0.0126149																								-0.248756	0.328152	3.05795	0.327017	0.606209		2.65789e-06	0.000569134	0.606493	0.0142645
						-0.143901	0	3.07646	0.325049	0.545911		1.8867e-06	0.00045683	0.54614	0.0126149																								-0.249095	0.328609	3.05792	0.327019	0.606778		2.6549e-06	0.000568502	0.607062	0.0142643
						-0.144358	0	3.07644	0.325051	0.546368		1.8867e-06	0.00045683	0.546597	0.0126149																								-0.249433	0.329066	3.0579	0.327022	0.607346		2.6519e-06	0.00056787	0.60763	0.014264
						-0.144815	0	3.07643	0.325053	0.546825		1.8867e-06	0.00045683	0.547053	0.0126149																								-0.249771	0.329523	3.05787	0.327025	0.607914		2.64889e-06	0.000567239	0.608198	0.0142637
						-0.145272	0	3.07641	0.325054	0.547282		1.8867e-06	0.00045683	0.54751	0.0126149																								-0.250107	0.32998	3.05785	0.327027	0.608481		2.64588e-06	0.000566608	0.608765	0.0142634
						-0.145729	0	3.07639	0.325056	0.547739		1.73451e-06	0.00045683	0.547967	0.0115974																								-0.250442	0.330437	3.05782	0.32703	0.609048		2.64287e-06	0.000565977	0.609331	0.0142631
						-0.146185	0	3.07637	0.325058	0.548196		1.73451e-06	0.00045683	0.548424	0.0115974																								-0.250776	0.330893	3.0578	0.327033	0.609614		2.63986e-06	0.000565347	0.609897	0.0142627
						-0.146642	0	3.07636	0.32506	0.548652		1.73451e-06	0.00045683	0.548881	0.0115974																								-0.251109	0.33135	3.05778	0.327035	0.610179		2.55867e-06	0.000564717	0.610462	0.0138395
						-0.147099	0	3.07634	0.325061	0.549109		1.73451e-06	0.00045683	0.549338	0.0115974																								-0.251441	0.331807	3.05775	0.327038	0.610744		2.46381e-06	0.000564124	0.611026	0.0133404
						-0.147556	0	3.07632	0.325063	0.549566		1.73451e-06	0.00045683	0.549794	0.0115974																								-0.251772	0.332264	3.05773	0.32704	0.611308		2.46386e-06	0.000563548	0.61159	0.0133543
						-0.148013	0	3.07631	0.325065	0.550023		1.73451e-06	0.00045683	0.550251	0.0115974																								-0.252102	0.332721	3.05771	0.327043	0.611872		2.46142e-06	0.000562972	0.612153	0.0133547
						-0.14847	0	3.07629	0.325067	0.55048		1.73451e-06	0.00045683	0.550708	0.0115974																								-0.252431	0.333178	3.05768	0.327045	0.612435		2.45897e-06	0.000562397	0.612716	0.013355
						-0.148926	0	3.07628	0.325068	0.550937		1.73451e-06	0.00045683	0.551165	0.0115974																								-0.252759	0.333634	3.05766	0.327048	0.612997		2.45652e-06	0.000561822	0.613278	0.0133554
						-0.149383	0	3.07626	0.32507	0.551393		1.73451e-06	0.00045683	0.551622	0.0115974																								-0.253086	0.334091	3.05764	0.32705	0.613559		2.45406e-06	0.000561248	0.613839	0.0133557
						-0.14984	0	3.07624	0.325072	0.55185		1.73451e-06	0.00045683	0.552079	0.0115974																								-0.253412	0.334548	3.05761	0.327052	0.61412		2.4516e-06	0.000560674	0.6144	0.013356
						-0.150297	0	3.07623	0.325074	0.552307		1.73451e-06	0.00045683	0.552535	0.0115974																								-0.253737	0.335005	3.05759	0.327055	0.614681		2.44914e-06	0.0005601	0.614961	0.0133562
						-0.150754	0	3.07621	0.325075	0.552764		1.57974e-06	0.00045683	0.552992	0.0105625																								-0.254062	0.335462	3.05757	0.327057	0.615241		2.44668e-06	0.000559527	0.615521	0.0133564
						-0.151211	0	3.07619	0.325077	0.553221		1.57974e-06	0.00045683	0.553449	0.0105625																								-0.254385	0.335918	3.05754	0.32706	0.6158		2.44421e-06	0.000558955	0.61608	0.0133566
						-0.151667	0	3.07618	0.325079	0.553677		1.57974e-06	0.00045683	0.553906	0.0105625																								-0.254707	0.336375	3.05752	0.327062	0.616359		2.41316e-06	0.000558382	0.616639	0.0132005
						-0.152124	0	3.07616	0.32508	0.554134		1.57974e-06	0.00045683	0.554363	0.0105625																								-0.255028	0.336832	3.0575	0.327065	0.616918		2.35143e-06	0.0005578	0.617197	0.0128762
						-0.152581	0	3.07615	0.325082	0.554591		1.57974e-06	0.00045683	0.55482	0.0105625																								-0.255348	0.337289	3.05748	0.327067	0.617476		2.34881e-06	0.000557197	0.617754	0.0128758
						-0.153038	0	3.07613	0.325083	0.555048		1.57974e-06	0.00045683	0.555276	0.0105625																								-0.255667	0.337746	3.05746	0.327069	0.618033		2.34619e-06	0.000556594	0.618311	0.0128754
						-0.153495	0	3.07612	0.325085	0.555505		1.57974e-06	0.00045683	0.555733	0.0105625																								-0.255985	0.338203	3.05743	0.327072	0.618589		2.33835e-06	0.000555991	0.618867	0.0128463
						-0.153952	0	3.07611	0.325086	0.555962		1.57974e-06	0.00045683	0.55619	0.0105625																								-0.256302	0.338659	3.05741	0.327074	0.619145		2.25989e-06	0.000555393	0.619423	0.0124286
						-0.154408	0	3.07609	0.325088	0.556418		1.57974e-06	0.00045683	0.556647	0.0105625																								-0.256618	0.339116	3.05739	0.327076	0.619701		2.25784e-06	0.000554871	0.619978	0.012429
						-0.154865	0	3.07608	0.32509	0.556875		1.57974e-06	0.00045683	0.557104	0.0105625																								-0.256933	0.339573	3.05737	0.327079	0.620256		2.25579e-06	0.000554348	0.620533	0.0124294
						-0.155322	0	3.07606	0.325091	0.557332		1.57974e-06	0.00045683	0.557561	0.0105625																								-0.257247	0.34003	3.05735	0.327081	0.62081		2.25374e-06	0.000553827	0.621087	0.0124298
						-0.155779	0	3.07605	0.325093	0.557789		1.422e-06	0.00045683	0.558017	0.00950783																								-0.25756	0.340487	3.05733	0.327083	0.621364		2.25168e-06	0.000553306	0.62164	0.0124302
						-0.156236	0	3.07603	0.325094	0.558246		1.422e-06	0.00045683	0.558474	0.00950783																								-0.257872	0.340944	3.05731	0.327085	0.621917		2.24962e-06	0.000552785	0.622193	0.0124305
						-0.156693	0	3.07602	0.325096	0.558703		1.422e-06	0.00045683	0.558931	0.00950783																								-0.258183	0.3414	3.05728	0.327088	0.62247		2.2186e-06	0.000552265	0.622746	0.0122706
						-0.157149	0	3.076	0.325097	0.559159		1.422e-06	0.00045683	0.559388	0.00950783																								-0.258493	0.341857	3.05726	0.32709	0.623022		2.1565e-06	0.000551735	0.623298	0.0119386
						-0.157606	0	3.07599	0.325098	0.559616		1.422e-06	0.00045683	0.559845	0.00950783																								-0.258803	0.342314	3.05724	0.327092	0.623574		2.15431e-06	0.000551185	0.623849	0.0119384
						-0.158063	0	3.07598	0.3251	0.560073		1.422e-06	0.00045683	0.560302	0.00950783																								-0.259111	0.342771	3.05722	0.327094	0.624125		2.15212e-06	0.000550636	0.6244	0.0119382
						-0.15852	0	3.07596	0.325101	0.56053		1.422e-06	0.00045683	0.560758	0.00950783																								-0.259419	0.343228	3.0572	0.327096	0.624676		2.14993e-06	0.000550087	0.624951	0.0119379
						-0.158977	0	3.07595	0.325103	0.560987		1.422e-06	0.00045683	0.561215	0.00950783																								-0.259725	0.343685	3.05718	0.327098	0.625226		2.14773e-06	0.000549538	0.6255	0.0119376
						-0.159434	0	3.07594	0.325104	0.561444		1.422e-06	0.00045683	0.561672	0.00950783																								-0.26003	0.344141	3.05716	0.327101	0.625775		2.14553e-06	0.00054899	0.62605	0.0119373
						-0.15989	0	3.07592	0.325106	0.5619		1.422e-06	0.00045683	0.562129	0.00950783																								-0.260335	0.344598	3.05714	0.327103	0.626324		2.14332e-06	0.000548441	0.626598	0.0119369
						-0.160347	0	3.07591	0.325107	0.562357		1.422e-06	0.00045683	0.562586	0.00950783																								-0.260638	0.345055	3.05712	0.327105	0.626873		2.14111e-06	0.000547894	0.627147	0.0119365
						-0.160804	0	3.0759	0.325108	0.562814		1.26089e-06	0.00045683	0.563042	0.0084306																								-0.260941	0.345512	3.0571	0.327107	0.627421		2.1389e-06	0.000547346	0.627694	0.0119361
						-0.161261	0	3.07589	0.32511	0.563271		1.26089e-06	0.00045683	0.563499	0.0084306																								-0.261242	0.345969	3.05708	0.327109	0.627968		2.0798e-06	0.000546798	0.628241	0.011618
						-0.161718	0	3.07587	0.325111	0.563728		1.26089e-06	0.00045683	0.563956	0.0084306																								-0.261543	0.346426	3.05706	0.327111	0.628515		2.03346e-06	0.000546309	0.628788	0.0113693
						-0.162175	0	3.07586	0.325112	0.564185		1.26089e-06	0.00045683	0.564413	0.0084306																								-0.261842	0.346882	3.05704	0.327113	0.629061		1.97136e-06	0.000545827	0.629334	0.0110318
						-0.162631	0	3.07585	0.325113	0.564641		1.26089e-06	0.00045683	0.56487	0.0084306																								-0.262141	0.347339	3.05703	0.327115	0.629607		1.96954e-06	0.000545325	0.62988	0.0110317
						-0.163088	0	3.07584	0.325115	0.565098		1.26089e-06	0.00045683	0.565327	0.0084306																								-0.262439	0.347796	3.05701	0.327117	0.630152		1.97443e-06	0.000544824	0.630425	0.0110693
						-0.163545	0	3.07583	0.325116	0.565555		1.26089e-06	0.00045683	0.565783	0.0084306																								-0.262736	0.348253	3.05699	0.327119	0.630697		1.9779e-06	0.000544324	0.630969	0.011099
						-0.164002	0	3.07581	0.325117	0.566012		1.26089e-06	0.00045683	0.56624	0.0084306																								-0.263032	0.34871	3.05697	0.327121	0.631241		1.97614e-06	0.000543824	0.631513	0.0110993
						-0.164459	0	3.0758	0.325118	0.566469		1.26089e-06	0.00045683	0.566697	0.0084306																								-0.263327	0.349167	3.05695	0.327123	0.631785		1.97438e-06	0.000543324	0.632057	0.0110996
						-0.164915	0	3.07579	0.32512	0.566926		1.26089e-06	0.00045683	0.567154	0.0084306																								-0.263621	0.349623	3.05693	0.327125	0.632328		1.97261e-06	0.000542825	0.6326	0.0110998
						-0.165372	0	3.07578	0.325121	0.567382		1.26089e-06	0.00045683	0.567611	0.0084306																								-0.263914	0.35008	3.05692	0.327127	0.632871		1.97084e-06	0.000542326	0.633142	0.0111001
						-0.165829	0	3.07577	0.325122	0.567839		1.09595e-06	0.00045683	0.568068	0.00732776																								-0.264206	0.350537	3.0569	0.327129	0.633414		1.96907e-06	0.000541827	0.633685	0.0111003
						-0.166286	0	3.07576	0.325123	0.568296		1.09595e-06	0.00045683	0.568524	0.00732776																								-0.264498	0.350994	3.05688	0.327131	0.633955		1.96729e-06	0.000541329	0.634226	0.0111005
						-0.166743	0	3.07575	0.325124	0.568753		1.09595e-06	0.00045683	0.568981	0.00732776																								-0.264788	0.351451	3.05686	0.327133	0.634497		1.93642e-06	0.000540831	0.634767	0.0109364
						-0.1672	0	3.07573	0.325126	0.56921		1.09595e-06	0.00045683	0.569438	0.00732776																								-0.265078	0.351908	3.05684	0.327135	0.635038		1.87433e-06	0.000540324	0.635308	0.0105956
						-0.167656	0	3.07572	0.325127	0.569667		1.09595e-06	0.00045683	0.569895	0.00732776																								-0.265366	0.352364	3.05683	0.327137	0.635578		1.87245e-06	0.0005398	0.635848	0.0105953
						-0.168113	0	3.07571	0.325128	0.570123		1.09595e-06	0.00045683	0.570352	0.00732776																								-0.265654	0.352821	3.05681	0.327139	0.636118		1.87056e-06	0.000539276	0.636387	0.0105949
						-0.16857	0	3.0757	0.325129	0.57058		1.09595e-06	0.00045683	0.570809	0.00732776																								-0.26594	0.353278	3.05679	0.327141	0.636657		1.86867e-06	0.000538752	0.636926	0.0105945
						-0.169027	0	3.07569	0.32513	0.571037		1.09595e-06	0.00045683	0.571265	0.00732776																								-0.266226	0.353735	3.05677	0.327142	0.637196		1.82664e-06	0.000538229	0.637465	0.0103663
						-0.169484	0	3.07568	0.325131	0.571494		1.09595e-06	0.00045683	0.571722	0.00732776																								-0.266511	0.354192	3.05676	0.327144	0.637734		1.80141e-06	0.000537748	0.638003	0.0102322
						-0.169941	0	3.07567	0.325132	0.571951		1.09595e-06	0.00045683	0.572179	0.00732776																								-0.266794	0.354648	3.05674	0.327146	0.638272		1.79995e-06	0.000537292	0.63854	0.0102326
						-0.170397	0	3.07566	0.325133	0.572407		1.09595e-06	0.00045683	0.572636	0.00732776																								-0.267077	0.355105	3.05672	0.327148	0.638809		1.79849e-06	0.000536837	0.639077	0.0102329
						-0.170854	0	3.07565	0.325134	0.572864		9.26675e-07	0.00045683	0.573093	0.00619596																								-0.267359	0.355562	3.05671	0.32715	0.639346		1.79703e-06	0.000536383	0.639614	0.0102333
						-0.171311	0	3.07564	0.325135	0.573321		9.26675e-07	0.00045683	0.57355	0.00619596																								-0.26764	0.356019	3.05669	0.327151	0.639882		1.79556e-06	0.000535929	0.64015	0.0102336
						-0.171768	0	3.07563	0.325136	0.573778		9.26675e-07	0.00045683	0.574006	0.00619596																								-0.26792	0.356476	3.05667	0.327153	0.640418		1.76505e-06	0.000535475	0.640686	0.0100682
						-0.172225	0	3.07563	0.325137	0.574235		9.26675e-07	0.00045683	0.574463	0.00619596																								-0.2682	0.356933	3.05666	0.327155	0.640954		1.70339e-06	0.000535013	0.641221	0.0097249
						-0.172682	0	3.07562	0.325138	0.574692		9.26675e-07	0.00045683	0.57492	0.00619596																								-0.268478	0.357389	3.05664	0.327157	0.641489		1.70184e-06	0.000534536	0.641756	0.00972472
						-0.173138	0	3.07561	0.325139	0.575148		9.26675e-07	0.00045683	0.575377	0.00619596																								-0.268756	0.357846	3.05662	0.327158	0.642023		1.70028e-06	0.000534058	0.64229	0.00972452
						-0.173595	0	3.0756	0.32514	0.575605		9.26675e-07	0.00045683	0.575834	0.00619596																								-0.269032	0.358303	3.05661	0.32716	0.642557		1.69873e-06	0.000533581	0.642824	0.0097243
						-0.174052	0	3.07559	0.325141	0.576062		9.26675e-07	0.00045683	0.576291	0.00619596																								-0.269308	0.35876	3.05659	0.327162	0.643091		1.69717e-06	0.000533104	0.643357	0.00972405
						-0.174509	0	3.07558	0.325142	0.576519		9.26675e-07	0.00045683	0.576747	0.00619596																								-0.269583	0.359217	3.05658	0.327164	0.643624		1.6956e-06	0.000532628	0.64389	0.00972379
						-0.174966	0	3.07557	0.325143	0.576976		9.26675e-07	0.00045683	0.577204	0.00619596																								-0.269857	0.359674	3.05656	0.327165	0.644157		1.69403e-06	0.000532151	0.644423	0.0097235
						-0.175423	0	3.07556	0.325144	0.577433		9.26675e-07	0.00045683	0.577661	0.00619596																								-0.27013	0.36013	3.05654	0.327167	0.644689		1.69246e-06	0.000531675	0.644955	0.00972318
						-0.175879	0	3.07556	0.325145	0.577889		7.52511e-07	0.00045683	0.578118	0.00503146																								-0.270402	0.360587	3.05653	0.327169	0.64522		1.69089e-06	0.000531199	0.645486	0.00972285
						-0.176336	0	3.07555	0.325145	0.578346		7.52511e-07	0.00045683	0.578575	0.00503146																								-0.270673	0.361044	3.05651	0.32717	0.645752		1.69742e-06	0.000530723	0.646017	0.00976914
						-0.176793	0	3.07554	0.325146	0.578803		7.52511e-07	0.00045683	0.579032	0.00503146																								-0.270943	0.361501	3.0565	0.327172	0.646282		1.67313e-06	0.000530248	0.646547	0.00963796
						-0.17725	0	3.07553	0.325147	0.57926		7.52511e-07	0.00045683	0.579488	0.00503146																								-0.271212	0.361958	3.05648	0.327174	0.646813		1.5861e-06	0.000529765	0.647077	0.00914498
						-0.177707	0	3.07553	0.325148	0.579717		7.52511e-07	0.00045683	0.579945	0.00503146																								-0.27148	0.362415	3.05647	0.327175	0.647342		1.55502e-06	0.000529296	0.647607	0.00897371
						-0.178164	0	3.07552	0.325148	0.580174		7.52511e-07	0.00045683	0.580402	0.00503146																								-0.271748	0.362871	3.05645	0.327177	0.647872		1.55381e-06	0.000528861	0.648136	0.00897409
						-0.17862	0	3.07551	0.325149	0.58063		7.52511e-07	0.00045683	0.580859	0.00503146																								-0.272014	0.363328	3.05644	0.327178	0.648401		1.55259e-06	0.000528426	0.648665	0.00897444
						-0.179077	0	3.07551	0.32515	0.581087		7.52511e-07	0.00045683	0.581316	0.00503146																								-0.27228	0.363785	3.05642	0.32718	0.648929		1.55137e-06	0.000527992	0.649193	0.00897479
						-0.179534	0	3.0755	0.325151	0.581544		7.52511e-07	0.00045683	0.581772	0.00503146																								-0.272544	0.364242	3.05641	0.327181	0.649457		1.55015e-06	0.000527558	0.649721	0.00897511
						-0.179991	0	3.07549	0.325151	0.582001		7.52511e-07	0.00045683	0.582229	0.00503146																								-0.272808	0.364699	3.05639	0.327183	0.649984		1.54893e-06	0.000527124	0.650248	0.00897542
						-0.180448	0	3.07548	0.325152	0.582458		7.52511e-07	0.00045683	0.582686	0.00503146																								-0.273071	0.365156	3.05638	0.327185	0.650512		1.54771e-06	0.000526691	0.650775	0.00897571
						-0.180905	0	3.07548	0.325153	0.582915		5.72835e-07	0.00045683	0.583143	0.0038301																								-0.273333	0.365612	3.05636	0.327186	0.651038		1.54648e-06	0.000526258	0.651301	0.00897598
						-0.181361	0	3.07547	0.325153	0.583371		5.72835e-07	0.00045683	0.5836	0.0038301																								-0.273595	0.366069	3.05635	0.327188	0.651565		1.54525e-06	0.000525825	0.651827	0.00897623
						-0.181818	0	3.07547	0.325154	0.583828		5.72835e-07	0.00045683	0.584057	0.0038301																								-0.273855	0.366526	3.05634	0.327189	0.65209		1.5152e-06	0.000525392	0.652353	0.00880892
						-0.182275	0	3.07546	0.325155	0.584285		5.72835e-07	0.00045683	0.584513	0.0038301																								-0.274115	0.366983	3.05632	0.327191	0.652616		1.45425e-06	0.000524953	0.652878	0.00846162
						-0.182732	0	3.07546	0.325155	0.584742		5.72835e-07	0.00045683	0.58497	0.0038301																								-0.274373	0.36744	3.05631	0.327192	0.653141		1.45296e-06	0.000524502	0.653403	0.00846139
						-0.183189	0	3.07545	0.325156	0.585199		5.72835e-07	0.00045683	0.585427	0.0038301																								-0.274631	0.367897	3.05629	0.327194	0.653665		1.45167e-06	0.000524051	0.653927	0.00846113
						-0.183646	0	3.07544	0.325156	0.585656		5.72835e-07	0.00045683	0.585884	0.0038301																								-0.274888	0.368353	3.05628	0.327195	0.654189		1.45037e-06	0.000523601	0.654451	0.00846085
						-0.184102	0	3.07544	0.325157	0.586112		5.72835e-07	0.00045683	0.586341	0.0038301																								-0.275144	0.36881	3.05627	0.327197	0.654713		1.44907e-06	0.00052315	0.654974	0.00846056
						-0.184559	0	3.07543	0.325157	0.586569		5.72835e-07	0.00045683	0.586798	0.0038301																								-0.275399	0.369267	3.05625	0.327198	0.655236		1.44777e-06	0.0005227	0.655497	0.00846024
						-0.185016	0	3.07543	0.325158	0.587026		5.72835e-07	0.00045683	0.587254	0.0038301																								-0.275653	0.369724	3.05624	0.327199	0.655759		1.44646e-06	0.000522249	0.65602	0.0084599
						-0.185473	0	3.07542	0.325159	0.587483		5.72835e-07	0.00045683	0.587711	0.0038301																								-0.275906	0.370181	3.05623	0.327201	0.656281		1.44516e-06	0.000521799	0.656542	0.00845954
						-0.18593	0	3.07542	0.325159	0.58794		3.86954e-07	0.00045683	0.588168	0.00258726																								-0.276158	0.370638	3.05621	0.327202	0.656803		1.43876e-06	0.000521349	0.657063	0.00842939
						-0.186386	0	3.07541	0.325159	0.588397		3.86954e-07	0.00045683	0.588625	0.00258726																								-0.276409	0.371094	3.0562	0.327204	0.657324		1.39555e-06	0.000520905	0.657585	0.0081832
						-0.186843	0	3.07541	0.32516	0.588853		3.86954e-07	0.00045683	0.589082	0.00258726																								-0.276659	0.371551	3.05619	0.327205	0.657845		1.36591e-06	0.000520511	0.658105	0.00801542
						-0.1873	0	3.07541	0.32516	0.58931		3.86954e-07	0.00045683	0.589539	0.00258726																								-0.276909	0.372008	3.05617	0.327207	0.658366		1.30555e-06	0.000520113	0.658626	0.00766708
						-0.187757	0	3.0754	0.325161	0.589767		3.86954e-07	0.00045683	0.589995	0.00258726																								-0.277157	0.372465	3.05616	0.327208	0.658886		1.30747e-06	0.000519706	0.659146	0.00768439
						-0.188214	0	3.0754	0.325161	0.590224		3.86954e-07	0.00045683	0.590452	0.00258726																								-0.277405	0.372922	3.05615	0.327209	0.659405		1.31936e-06	0.000519299	0.659665	0.00776037
						-0.188671	0	3.0754	0.325161	0.590681		3.86954e-07	0.00045683	0.590909	0.00258726																								-0.277652	0.373379	3.05614	0.32721	0.659925		1.31838e-06	0.000518892	0.660184	0.00776068
						-0.189127	0	3.07539	0.325162	0.591138		3.86954e-07	0.00045683	0.591366	0.00258726																								-0.277898	0.373835	3.05612	0.327212	0.660444		1.3174e-06	0.000518485	0.660703	0.00776099
						-0.189584	0	3.07539	0.325162	0.591594		3.86954e-07	0.00045683	0.591823	0.00258726																								-0.278143	0.374292	3.05611	0.327213	0.660962		1.31642e-06	0.000518079	0.661221	0.00776127
						-0.190041	0	3.07538	0.325163	0.592051		3.86954e-07	0.00045683	0.59228	0.00258726																								-0.278388	0.374749	3.0561	0.327214	0.66148		1.31543e-06	0.000517673	0.661739	0.00776155
						-0.190498	0	3.07538	0.325163	0.592508		3.86954e-07	0.00045683	0.592736	0.00258726																								-0.278631	0.375206	3.05609	0.327216	0.661998		1.31444e-06	0.000517267	0.662256	0.0077618
						-0.190955	0	3.07538	0.325163	0.592965		1.94093e-07	0.00045683	0.593193	0.00129775																								-0.278874	0.375663	3.05608	0.327217	0.662515		1.31345e-06	0.000516861	0.662773	0.00776204
						-0.191412	0	3.07538	0.325164	0.593422		1.94093e-07	0.00045683	0.59365	0.00129775																								-0.279116	0.376119	3.05606	0.327218	0.663032		1.31246e-06	0.000516456	0.66329	0.00776227
						-0.191868	0	3.07537	0.325164	0.593878		1.94093e-07	0.00045683	0.594107	0.00129775																								-0.279357	0.376576	3.05605	0.32722	0.663548		1.28259e-06	0.000516051	0.663806	0.00759155
						-0.192325	0	3.07537	0.325164	0.594335		1.94093e-07	0.00045683	0.594564	0.00129775																								-0.279597	0.377033	3.05604	0.327221	0.664064		1.22176e-06	0.000515643	0.664322	0.00723723
						-0.192782	0	3.07537	0.325164	0.594792		1.94093e-07	0.00045683	0.595021	0.00129775																								-0.279836	0.37749	3.05603	0.327222	0.66458		1.22074e-06	0.00051523	0.664838	0.00723698
						-0.193239	0	3.07537	0.325164	0.595249		1.94093e-07	0.00045683	0.595477	0.00129775																								-0.280074	0.377947	3.05602	0.327223	0.665095		1.21972e-06	0.000514818	0.665353	0.00723672
						-0.193696	0	3.07537	0.325165	0.595706		1.94093e-07	0.00045683	0.595934	0.00129775																								-0.280311	0.378404	3.05601	0.327225	0.66561		1.2187e-06	0.000514405	0.665867	0.00723644
						-0.194153	0	3.07536	0.325165	0.596163		1.94093e-07	0.00045683	0.596391	0.00129775																								-0.280548	0.37886	3.05599	0.327226	0.666125		1.21767e-06	0.000513993	0.666382	0.00723614
						-0.194609	0	3.07536	0.325165	0.596619		1.94093e-07	0.00045683	0.596848	0.00129775																								-0.280783	0.379317	3.05598	0.327227	0.666639		1.21664e-06	0.000513581	0.666895	0.00723583
						-0.195066	0	3.07536	0.325165	0.597076		1.94093e-07	0.00045683	0.597305	0.00129775																								-0.281018	0.379774	3.05597	0.327228	0.667152		1.21561e-06	0.000513169	0.667409	0.00723549
						-0.195523	0	3.07536	0.325165	0.597533		1.21309e-07	0.00045683	0.597762	0.000811098																								-0.281252	0.380231	3.05596	0.327229	0.667665		1.20149e-06	0.000512757	0.667922	0.00715724
						-0.19598	0	3.07536	0.325165	0.59799		0	0.00045683	0.598218	0																								-0.281485	0.380688	3.05595	0.327231	0.668178		1.17454e-06	0.000512362	0.668434	0.00700208
						-0.196437	0	3.07536	0.325165	0.598447		0	0.00045683	0.598675	0																								-0.281717	0.381145	3.05594	0.327232	0.66869		1.17376e-06	0.000512001	0.668946	0.00700237
						-0.196894	0	3.07536	0.325165	0.598904		0	0.00045683	0.599132	0																								-0.281948	0.381601	3.05593	0.327233	0.669202		1.14373e-06	0.000511641	0.669458	0.00682799
						-0.19735	0	3.07536	0.325165	0.59936		0	0.00045683	0.599589	0																								-0.282178	0.382058	3.05592	0.327234	0.669714		1.08235e-06	0.000511283	0.66997	0.00646606
						-0.197807	0	3.07536	0.325165	0.599817		0	0.00045683	0.600046	0																								-0.282408	0.382515	3.05591	0.327235	0.670225		1.08158e-06	0.000510931	0.670481	0.00646594
						-0.198264	0	3.07536	0.325165	0.600274		0	0.00045683	0.600503	0																								-0.282637	0.382972	3.0559	0.327236	0.670736		1.08547e-06	0.000510579	0.670992	0.00649366
						-0.198721	0	3.07536	0.325165	0.600731		0	0.00228415	0.601873	0																								-0.282865	0.383429	3.05589	0.327237	0.671247		1.09744e-06	0.000510227	0.671502	0.00656978
						-0.201005	0	3.07536	0.325165	0.603015																													-0.283092	0.383886	3.05588	0.327238	0.671757		1.09673e-06	0.000509876	0.672012	0.00657005
																																							-0.283318	0.384342	3.05586	0.32724	0.672267		1.09601e-06	0.000509525	0.672522	0.00657031
																																							-0.283544	0.384799	3.05585	0.327241	0.672776		1.0953e-06	0.000509174	0.673031	0.00657056
																																							-0.283769	0.385256	3.05584	0.327242	0.673286		1.09459e-06	0.000508824	0.67354	0.00657079
																																							-0.283993	0.385713	3.05583	0.327243	0.673794		1.09387e-06	0.000508473	0.674049	0.00657102
																																							-0.284216	0.38617	3.05582	0.327244	0.674303		1.09315e-06	0.000508124	0.674557	0.00657123
																																							-0.284439	0.386627	3.05581	0.327245	0.674811		1.06165e-06	0.000507774	0.675065	0.00638623
																																							-0.284661	0.387083	3.0558	0.327246	0.675319		9.97179e-07	0.00050744	0.675573	0.00600238
																																							-0.284881	0.38754	3.05579	0.327247	0.675826		9.96558e-07	0.00050714	0.67608	0.0060022
																																							-0.285102	0.387997	3.05579	0.327248	0.676333		9.95937e-07	0.00050684	0.676587	0.006002
																																							-0.285321	0.388454	3.05578	0.327249	0.67684		9.95315e-07	0.000506541	0.677094	0.00600179
																																							-0.28554	0.388911	3.05577	0.32725	0.677347		9.94694e-07	0.000506243	0.6776	0.00600158
																																							-0.285758	0.389368	3.05576	0.327251	0.677853		9.94073e-07	0.000505946	0.678106	0.00600136
																																							-0.285976	0.389824	3.05575	0.327252	0.678359		9.93451e-07	0.000505649	0.678612	0.00600112
																																							-0.286192	0.390281	3.05574	0.327253	0.678865		9.9283e-07	0.000505353	0.679117	0.00600088
																																							-0.286408	0.390738	3.05573	0.327254	0.67937		9.63438e-07	0.000505058	0.679623	0.00582664
																																							-0.286624	0.391195	3.05572	0.327255	0.679875		9.5944e-07	0.000504807	0.680127	0.00580535
																																							-0.286839	0.391652	3.05571	0.327256	0.68038		9.24103e-07	0.000504561	0.680632	0.00559425
																																							-0.287053	0.392109	3.0557	0.327257	0.680884		8.51517e-07	0.000504405	0.681137	0.00515643
																																							-0.287267	0.392565	3.0557	0.327258	0.681389		8.52679e-07	0.000504437	0.681641	0.00516313
																																							-0.287481	0.393022	3.05569	0.327259	0.681893		8.70923e-07	0.000504478	0.682145	0.00527318
																																							-0.287695	0.393479	3.05568	0.32726	0.682398		8.71002e-07	0.000504528	0.68265	0.00527314
																																							-0.287909	0.393936	3.05567	0.32726	0.682902		8.71095e-07	0.000504587	0.683155	0.00527308
																																							-0.288123	0.394393	3.05566	0.327261	0.683407		8.71203e-07	0.000504656	0.683659	0.00527302
																																							-0.288338	0.39485	3.05565	0.327262	0.683911		8.71328e-07	0.000504735	0.684164	0.00527295
																																							-0.288552	0.395306	3.05565	0.327263	0.684416		8.71469e-07	0.000504825	0.684669	0.00527287
																																							-0.288767	0.395763	3.05564	0.327264	0.684921		8.71628e-07	0.000504926	0.685174	0.00527277
																																							-0.288982	0.39622	3.05563	0.327265	0.685426		8.71806e-07	0.000505039	0.685678	0.00527267
																																							-0.289197	0.396677	3.05562	0.327266	0.685931		8.1972e-07	0.000505164	0.686184	0.00495642
																																							-0.289413	0.397134	3.05561	0.327266	0.686436		7.15289e-07	0.000507663	0.68669	0.00430369
																																							-0.289634	0.39759	3.05561	0.327267	0.686944		7.28327e-07	0.000516449	0.687202	0.00430759
																																							-0.289875	0.398047	3.0556	0.327268	0.68746		7.44345e-07	0.000528026	0.687724	0.00430581
																																							-0.29014	0.398504	3.05559	0.327269	0.687988		7.64502e-07	0.000543739	0.68826	0.00429461
																																							-0.290435	0.398961	3.05559	0.327269	0.688532		7.90646e-07	0.000565855	0.688815	0.00426788
																																							-0.290769	0.399418	3.05558	0.32727	0.689098		8.25923e-07	0.000598443	0.689397	0.00421553
																																							-0.291156	0.399875	3.05557	0.327271	0.689696		8.44861e-07	0.000642745	0.690018	0.00401497
																																							-0.291612	0.400327	3.05556	0.327272	0.690339		6.90141e-07	0.000583147	0.690631	0.00361489
																																							-0.292069	0.400689	3.05556	0.327273	0.690922		5.98052e-07	0.000540165	0.691192	0.0033818
																																							-0.292526	0.400977	3.05555	0.327273	0.691462		5.23157e-07	0.00051052	0.691718	0.00313007
																																							-0.292983	0.401205	3.05555	0.327274	0.691973		4.62839e-07	0.000490755	0.692218	0.00288072
																																							-0.29344	0.401385	3.05554	0.327274	0.692464		4.14659e-07	0.00047794	0.692703	0.00265004
																																							-0.293896	0.401525	3.05554	0.327275	0.692942		3.76435e-07	0.000469811	0.693177	0.00244739
																																							-0.294353	0.401635	3.05554	0.327275	0.693411		3.46281e-07	0.00046474	0.693644	0.0022759
																																							-0.29481	0.40172	3.05553	0.327275	0.693876		3.22602e-07	0.000461616	0.694107	0.00213462
																																							-0.295267	0.401786	3.05553	0.327276	0.694338		3.04079e-07	0.000459709	0.694568	0.0020204
																																							-0.295724	0.401838	3.05553	0.327276	0.694797		2.89635e-07	0.000458555	0.695027	0.00192928
																																							-0.296181	0.401878	3.05552	0.327276	0.695256		2.80895e-07	0.000457859	0.695485	0.00187391
																																							-0.296637	0.401908	3.05552	0.327276	0.695714		2.48739e-07	0.000457441	0.695943	0.0016609
																																							-0.297094	0.401932	3.05552	0.327277	0.696171		2.42441e-07	0.000457192	0.6964	0.00161973
																																							-0.297551	0.40195	3.05552	0.327277	0.696629		2.37584e-07	0.000457044	0.696857	0.0015878
																																							-0.298008	0.401964	3.05551	0.327277	0.697086		2.33842e-07	0.000456956	0.697314	0.00156309
																																							-0.298465	0.401975	3.05551	0.327277	0.697543		2.30962e-07	0.000456904	0.697771	0.00154401
																																							-0.298922	0.401983	3.05551	0.327278	0.697999		2.28748e-07	0.000456873	0.698228	0.00152931
																																							-0.299378	0.401989	3.05551	0.327278	0.698456		2.27045e-07	0.000456855	0.698685	0.00151799
																																							-0.299835	0.401994	3.05551	0.327278	0.698913		2.25738e-07	0.000456845	0.699142	0.00150929
																																							-0.300292	0.401998	3.0555	0.327278	0.69937		2.24735e-07	0.000456838	0.699598	0.0015026
																																							-0.300749	0.402001	3.0555	0.327279	0.699827		2.23965e-07	0.000456835	0.700055	0.00149747
																																							-0.301206	0.402003	3.0555	0.327279	0.700284		2.18766e-07	0.000456833	0.700512	0.00146271
																																							-0.301663	0.402005	3.0555	0.327279	0.700741		2.07935e-07	0.000456831	0.700969	0.0013903
																																							-0.302119	0.402006	3.0555	0.327279	0.701197		2.07612e-07	0.000456831	0.701426	0.00138814
																																							-0.302576	0.402007	3.05549	0.327279	0.701654		2.07366e-07	0.00045683	0.701883	0.00138649
																																							-0.303033	0.402008	3.05549	0.32728	0.702111		2.07178e-07	0.00045683	0.702339	0.00138523
																																							-0.30349	0.402008	3.05549	0.32728	0.702568		2.07034e-07	0.00045683	0.702796	0.00138427
																																							-0.303947	0.402009	3.05549	0.32728	0.703025		2.06924e-07	0.00045683	0.703253	0.00138354
																																							-0.304404	0.402009	3.05549	0.32728	0.703482		2.0684e-07	0.00045683	0.70371	0.00138298
																																							-0.30486	0.402009	3.05548	0.32728	0.703938		2.06776e-07	0.00045683	0.704167	0.00138255
																																							-0.305317	0.402009	3.05548	0.327281	0.704395		2.06727e-07	0.00045683	0.704624	0.00138222
																																							-0.305774	0.40201	3.05548	0.327281	0.704852		2.0669e-07	0.00045683	0.70508	0.00138198
																																							-0.306231	0.40201	3.05548	0.327281	0.705309		2.028e-07	0.00045683	0.705537	0.00135597
																																							-0.306688	0.40201	3.05548	0.327281	0.705766		1.95196e-07	0.00045683	0.705994	0.00130512
																																							-0.307145	0.40201	3.05547	0.327281	0.706222		1.95181e-07	0.00045683	0.706451	0.00130502
																																							-0.307601	0.40201	3.05547	0.327282	0.706679		1.95169e-07	0.00045683	0.706908	0.00130494
																																							-0.308058	0.40201	3.05547	0.327282	0.707136		1.9516e-07	0.00045683	0.707365	0.00130488
																																							-0.308515	0.40201	3.05547	0.327282	0.707593		1.95153e-07	0.00045683	0.707821	0.00130484
																																							-0.308972	0.40201	3.05547	0.327282	0.70805		1.95148e-07	0.00045683	0.708278	0.0013048
																																							-0.309429	0.40201	3.05546	0.327282	0.708507		1.95144e-07	0.00045683	0.708735	0.00130478
																																							-0.309886	0.40201	3.05546	0.327283	0.708963		1.95141e-07	0.00045683	0.709192	0.00130476
																																							-0.310342	0.40201	3.05546	0.327283	0.70942		1.95138e-07	0.00045683	0.709649	0.00130474
																																							-0.310799	0.40201	3.05546	0.327283	0.709877		1.95137e-07	0.00045683	0.710106	0.00130473
																																							-0.311256	0.40201	3.05546	0.327283	0.710334		1.92258e-07	0.00045683	0.710562	0.00128548
																																							-0.311713	0.40201	3.05546	0.327283	0.710791		1.86654e-07	0.00045683	0.711019	0.00124801
																																							-0.31217	0.40201	3.05545	0.327284	0.711248		1.86653e-07	0.00045683	0.711476	0.00124801
																																							-0.312626	0.40201	3.05545	0.327284	0.711704		1.86653e-07	0.00045683	0.711933	0.001248
																																							-0.313083	0.40201	3.05545	0.327284	0.712161		1.86652e-07	0.00045683	0.71239	0.001248
																																							-0.31354	0.40201	3.05545	0.327284	0.712618		1.86652e-07	0.00045683	0.712847	0.001248
																																							-0.313997	0.40201	3.05545	0.327284	0.713075		1.86652e-07	0.00045683	0.713303	0.001248
																																							-0.314454	0.40201	3.05545	0.327285	0.713532		1.86652e-07	0.00045683	0.71376	0.00124799
																																							-0.314911	0.40201	3.05544	0.327285	0.713989		1.86651e-07	0.00045683	0.714217	0.00124799
																																							-0.315367	0.40201	3.05544	0.327285	0.714445		1.86651e-07	0.00045683	0.714674	0.00124799
																																							-0.315824	0.40201	3.05544	0.327285	0.714902		1.86651e-07	0.00045683	0.715131	0.00124799
																																							-0.316281	0.40201	3.05544	0.327285	0.715359		1.84628e-07	0.00045683	0.715587	0.00123447
																																							-0.316738	0.40201	3.05544	0.327285	0.715816		1.80691e-07	0.00045683	0.716044	0.00120814
																																							-0.317195	0.40201	3.05543	0.327286	0.716273		1.80691e-07	0.00045683	0.716501	0.00120814
																																							-0.317652	0.40201	3.05543	0.327286	0.71673		1.80691e-07	0.00045683	0.716958	0.00120814
																																							-0.318108	0.40201	3.05543	0.327286	0.717186		1.80691e-07	0.00045683	0.717415	0.00120814
																																							-0.318565	0.40201	3.05543	0.327286	0.717643		1.80691e-07	0.00045683	0.717872	0.00120814
																																							-0.319022	0.40201	3.05543	0.327286	0.7181		1.80691e-07	0.00045683	0.718328	0.00120814
																																							-0.319479	0.40201	3.05543	0.327287	0.718557		1.80691e-07	0.00045683	0.718785	0.00120814
																																							-0.319936	0.40201	3.05542	0.327287	0.719014		1.80691e-07	0.00045683	0.719242	0.00120814
																																							-0.320393	0.40201	3.05542	0.327287	0.719471		1.80691e-07	0.00045683	0.719699	0.00120814
																																							-0.320849	0.40201	3.05542	0.327287	0.719927		1.80691e-07	0.00045683	0.720156	0.00120814
																																							-0.321306	0.40201	3.05542	0.327287	0.720384		1.79389e-07	0.00045683	0.720613	0.00119943
																																							-0.321763	0.40201	3.05542	0.327287	0.720841		1.76854e-07	0.00045683	0.721069	0.00118249
																																							-0.32222	0.40201	3.05542	0.327288	0.721298		1.76854e-07	0.00045683	0.721526	0.00118249
																																							-0.322677	0.40201	3.05541	0.327288	0.721755		1.76854e-07	0.00045683	0.721983	0.00118249
																																							-0.323134	0.40201	3.05541	0.327288	0.722212		1.76854e-07	0.00045683	0.72244	0.00118249
																																							-0.32359	0.40201	3.05541	0.327288	0.722668		1.76854e-07	0.00045683	0.722897	0.00118249
																																							-0.324047	0.40201	3.05541	0.327288	0.723125		1.76854e-07	0.00045683	0.723354	0.00118249
																																							-0.324504	0.40201	3.05541	0.327289	0.723582		1.76854e-07	0.00045683	0.72381	0.00118249
																																							-0.324961	0.40201	3.05541	0.327289	0.724039		1.76854e-07	0.00045683	0.724267	0.00118249
																																							-0.325418	0.40201	3.0554	0.327289	0.724496		1.76854e-07	0.00045683	0.724724	0.00118249
																																							-0.325875	0.40201	3.0554	0.327289	0.724953		1.76854e-07	0.00045683	0.725181	0.00118249
																																							-0.326331	0.40201	3.0554	0.327289	0.725409		1.7615e-07	0.00045683	0.725638	0.00117778
																																							-0.326788	0.40201	3.0554	0.327289	0.725866		1.7478e-07	0.00045683	0.726095	0.00116862
																																							-0.327245	0.40201	3.0554	0.32729	0.726323		1.7478e-07	0.00045683	0.726551	0.00116862
																																							-0.327702	0.40201	3.0554	0.32729	0.72678		1.7478e-07	0.00045683	0.727008	0.00116862
																																							-0.328159	0.40201	3.0554	0.32729	0.727237		1.7478e-07	0.00045683	0.727465	0.00116862
																																							-0.328616	0.40201	3.05539	0.32729	0.727693		1.7478e-07	0.00045683	0.727922	0.00116862
																																							-0.329072	0.40201	3.05539	0.32729	0.72815		1.7478e-07	0.00045683	0.728379	0.00116862
																																							-0.329529	0.40201	3.05539	0.32729	0.728607		1.7478e-07	0.00045683	0.728836	0.00116862
																																							-0.329986	0.40201	3.05539	0.327291	0.729064		1.7478e-07	0.00045683	0.729292	0.00116862
																																							-0.330443	0.40201	3.05539	0.327291	0.729521		1.7478e-07	0.00045683	0.729749	0.00116862
																																							-0.3309	0.40201	3.05539	0.327291	0.729978		1.7478e-07	0.00045683	0.730206	0.00116862
																																							-0.331357	0.40201	3.05538	0.327291	0.730434		1.74561e-07	0.00045683	0.730663	0.00116716
																																							-0.331813	0.40201	3.05538	0.327291	0.730891		1.74136e-07	0.00045683	0.73112	0.00116431
																																							-0.33227	0.40201	3.05538	0.327291	0.731348		1.74136e-07	0.00045683	0.731577	0.00116431
																																							-0.332727	0.40201	3.05538	0.327292	0.731805		1.74136e-07	0.00045683	0.732033	0.00116431
																																							-0.333184	0.40201	3.05538	0.327292	0.732262		1.74136e-07	0.00045683	0.73249	0.00116431
																																							-0.333641	0.40201	3.05538	0.327292	0.732719		1.74136e-07	0.00045683	0.732947	0.00116431
																																							-0.334097	0.40201	3.05537	0.327292	0.733175		1.74136e-07	0.00045683	0.733404	0.00116431
																																							-0.334554	0.40201	3.05537	0.327292	0.733632		1.74136e-07	0.00045683	0.733861	0.00116431
																																							-0.335011	0.40201	3.05537	0.327293	0.734089		1.74136e-07	0.00045683	0.734318	0.00116431
																																							-0.335468	0.40201	3.05537	0.327293	0.734546		1.74136e-07	0.00045683	0.734774	0.00116431
																																							-0.335925	0.40201	3.05537	0.327293	0.735003		1.74136e-07	0.00045683	0.735231	0.00116431
																																							-0.336382	0.40201	3.05537	0.327293	0.73546		1.743e-07	0.00045683	0.735688	0.00116541
																																							-0.336838	0.40201	3.05536	0.327293	0.735916		1.74619e-07	0.00045683	0.736145	0.00116754
																																							-0.337295	0.40201	3.05536	0.327293	0.736373		1.74619e-07	0.00045683	0.736602	0.00116754
																																							-0.337752	0.40201	3.05536	0.327294	0.73683		1.74619e-07	0.00045683	0.737058	0.00116754
																																							-0.338209	0.40201	3.05536	0.327294	0.737287		1.74619e-07	0.00045683	0.737515	0.00116754
																																							-0.338666	0.40201	3.05536	0.327294	0.737744		1.74619e-07	0.00045683	0.737972	0.00116754
																																							-0.339123	0.40201	3.05536	0.327294	0.738201		1.74619e-07	0.00045683	0.738429	0.00116754
																																							-0.339579	0.40201	3.05535	0.327294	0.738657		1.74619e-07	0.00045683	0.738886	0.00116754
																																							-0.340036	0.40201	3.05535	0.327294	0.739114		1.74619e-07	0.00045683	0.739343	0.00116754
																																							-0.340493	0.40201	3.05535	0.327295	0.739571		1.74619e-07	0.00045683	0.739799	0.00116754
																																							-0.34095	0.40201	3.05535	0.327295	0.740028		1.74619e-07	0.00045683	0.740256	0.00116754
																																							-0.341407	0.40201	3.05535	0.327295	0.740485		1.75068e-07	0.00045683	0.740713	0.00117054
																																							-0.341864	0.40201	3.05535	0.327295	0.740942		1.75941e-07	0.00045683	0.74117	0.00117638
																																							-0.34232	0.40201	3.05534	0.327295	0.741398		1.75941e-07	0.00045683	0.741627	0.00117638
																																							-0.342777	0.40201	3.05534	0.327296	0.741855		1.75941e-07	0.00045683	0.742084	0.00117638
																																							-0.343234	0.40201	3.05534	0.327296	0.742312		1.75941e-07	0.00045683	0.74254	0.00117638
																																							-0.343691	0.40201	3.05534	0.327296	0.742769		1.75941e-07	0.00045683	0.742997	0.00117638
																																							-0.344148	0.40201	3.05534	0.327296	0.743226		1.75941e-07	0.00045683	0.743454	0.00117638
																																							-0.344605	0.40201	3.05534	0.327296	0.743683		1.75941e-07	0.00045683	0.743911	0.00117638
																																							-0.345061	0.40201	3.05533	0.327296	0.744139		1.75941e-07	0.00045683	0.744368	0.00117638
																																							-0.345518	0.40201	3.05533	0.327297	0.744596		1.75941e-07	0.00045683	0.744825	0.00117638
																																							-0.345975	0.40201	3.05533	0.327297	0.745053		1.75941e-07	0.00045683	0.745281	0.00117638
																																							-0.346432	0.40201	3.05533	0.327297	0.74551		1.76582e-07	0.00045683	0.745738	0.00118067
																																							-0.346889	0.40201	3.05533	0.327297	0.745967		1.77829e-07	0.00045683	0.746195	0.00118901
																																							-0.347346	0.40201	3.05533	0.327297	0.746423		1.77829e-07	0.00045683	0.746652	0.00118901
																																							-0.347802	0.40201	3.05532	0.327297	0.74688		1.77829e-07	0.00045683	0.747109	0.00118901
																																							-0.348259	0.40201	3.05532	0.327298	0.747337		1.77829e-07	0.00045683	0.747566	0.00118901
																																							-0.348716	0.40201	3.05532	0.327298	0.747794		1.77829e-07	0.00045683	0.748022	0.00118901
																																							-0.349173	0.40201	3.05532	0.327298	0.748251		1.77829e-07	0.00045683	0.748479	0.00118901
																																							-0.34963	0.40201	3.05532	0.327298	0.748708		1.77829e-07	0.00045683	0.748936	0.00118901
																																							-0.350087	0.40201	3.05532	0.327298	0.749164		1.77829e-07	0.00045683	0.749393	0.00118901
																																							-0.350543	0.40201	3.05531	0.327299	0.749621		1.77829e-07	0.00045683	0.74985	0.00118901
																																							-0.351	0.40201	3.05531	0.327299	0.750078		1.77829e-07	0.00045683	0.750307	0.00118901
																																							-0.351457	0.40201	3.05531	0.327299	0.750535		1.78571e-07	0.00045683	0.750763	0.00119396
																																							-0.351914	0.40201	3.05531	0.327299	0.750992		1.80014e-07	0.00045683	0.75122	0.00120361
																																							-0.352371	0.40201	3.05531	0.327299	0.751449		1.80014e-07	0.00045683	0.751677	0.00120361
																																							-0.352827	0.40201	3.05531	0.327299	0.751905		1.80014e-07	0.00045683	0.752134	0.00120361
																																							-0.353284	0.40201	3.0553	0.3273	0.752362		1.80014e-07	0.00045683	0.752591	0.00120361
																																							-0.353741	0.40201	3.0553	0.3273	0.752819		1.80014e-07	0.00045683	0.753048	0.00120361
																																							-0.354198	0.40201	3.0553	0.3273	0.753276		1.80014e-07	0.00045683	0.753504	0.00120361
																																							-0.354655	0.40201	3.0553	0.3273	0.753733		1.80014e-07	0.00045683	0.753961	0.00120361
																																							-0.355112	0.40201	3.0553	0.3273	0.75419		1.80014e-07	0.00045683	0.754418	0.00120361
																																							-0.355568	0.40201	3.0553	0.3273	0.754646		1.80014e-07	0.00045683	0.754875	0.00120361
																																							-0.356025	0.40201	3.05529	0.327301	0.755103		1.80014e-07	0.00045683	0.755332	0.00120361
																																							-0.356482	0.40201	3.05529	0.327301	0.75556		1.80761e-07	0.00045683	0.755789	0.00120861
																																							-0.356939	0.40201	3.05529	0.327301	0.756017		1.82216e-07	0.00045683	0.756245	0.00121834
																																							-0.357396	0.40201	3.05529	0.327301	0.756474		1.82216e-07	0.00045683	0.756702	0.00121834
																																							-0.357853	0.40201	3.05529	0.327301	0.756931		1.82216e-07	0.00045683	0.757159	0.00121834
																																							-0.358309	0.40201	3.05529	0.327302	0.757387		1.82216e-07	0.00045683	0.757616	0.00121834
																																							-0.358766	0.40201	3.05528	0.327302	0.757844		1.82216e-07	0.00045683	0.758073	0.00121834
																																							-0.359223	0.40201	3.05528	0.327302	0.758301		1.82216e-07	0.00045683	0.758529	0.00121834
																																							-0.35968	0.40201	3.05528	0.327302	0.758758		1.82216e-07	0.00045683	0.758986	0.00121834
																																							-0.360137	0.40201	3.05528	0.327302	0.759215		1.82216e-07	0.00045683	0.759443	0.00121834
																																							-0.360594	0.40201	3.05528	0.327302	0.759672		1.82216e-07	0.00045683	0.7599	0.00121834
																																							-0.36105	0.40201	3.05528	0.327303	0.760128		1.82216e-07	0.00045683	0.760357	0.00121834
																																							-0.361507	0.40201	3.05527	0.327303	0.760585		1.82865e-07	0.00045683	0.760814	0.00122268
																																							-0.361964	0.40201	3.05527	0.327303	0.761042		1.84128e-07	0.00045683	0.76127	0.00123112
																																							-0.362421	0.40201	3.05527	0.327303	0.761499		1.84128e-07	0.00045683	0.761727	0.00123112
																																							-0.362878	0.40201	3.05527	0.327303	0.761956		1.84128e-07	0.00045683	0.762184	0.00123112
																																							-0.363335	0.40201	3.05527	0.327304	0.762413		1.84128e-07	0.00045683	0.762641	0.00123112
																																							-0.363791	0.40201	3.05527	0.327304	0.762869		1.84128e-07	0.00045683	0.763098	0.00123112
																																							-0.364248	0.40201	3.05526	0.327304	0.763326		1.84128e-07	0.00045683	0.763555	0.00123112
																																							-0.364705	0.40201	3.05526	0.327304	0.763783		1.84128e-07	0.00045683	0.764011	0.00123112
																																							-0.365162	0.40201	3.05526	0.327304	0.76424		1.84128e-07	0.00045683	0.764468	0.00123112
																																							-0.365619	0.40201	3.05526	0.327305	0.764697		1.84128e-07	0.00045683	0.764925	0.00123112
																																							-0.366076	0.40201	3.05526	0.327305	0.765154		1.84128e-07	0.00045683	0.765382	0.00123112
																																							-0.366532	0.40201	3.05526	0.327305	0.76561		1.84553e-07	0.00045683	0.765839	0.00123396
																																							-0.366989	0.40201	3.05525	0.327305	0.766067		1.8538e-07	0.00045683	0.766296	0.00123949
																																							-0.367446	0.40201	3.05525	0.327305	0.766524		1.8538e-07	0.00045683	0.766752	0.00123949
[truncated: 77 more rows]
[truncated: 36 more columns]

## Sheet: Cond_matrix
																				0.327317	0.327316	0.327315	0.327313	0.327311	0.327309	0.327307	0.327305	0.327303	0.327301	0.327299	0.327297	0.327295	0.327293	0.327291	0.327289	0.327287	0.327285	0.327283	0.327281	0.327279	0.327276	0.327274	0.327271	0.327268	0.327264	0.32726	0.327255	0.32725	0.327244
[truncated: 160 more rows]
[truncated: 131 more columns]
