# Supplementary material for: Trajectories and Forces in Four-Electrode Chambers Operated in Object-Shift, Dielectrophoresis and Field-Cage Modes – Considerations from the System’s Point of View
Source: Preprints.org preprint supplement (doi:10.20944/preprints202309.2147.v1), 2023-09-30
Supplement: Supplementary file 6 [file Tab. S5_+-+- 1-in-0,1.xls]

## Sheet: Four Side Pointed +-+-__Obj_0
Basic Resistance	Basic Conductance	Mean Resistance	Mean Conductance	k		a_X	a_y	a_Resistance in Route	a_Conductance along trajectory	a_Trajectory length		a_Delta Cond	a_Step width along trajectory	a_Mid-distance	a_norm. Force (Delta Cond./basic/diSTep)		b_X	b_Y	b_Resistance in Routh	b_Conductance along trajectory	b_Trajectory length		b-Delta Cond	b_Step width along trajectory	b_Mid-distance	b_norm. Force (Delta Cond./basic/diSTep)		c_X	c_Y	c_Resistance in Routh	c_Conductance along trajectory	c_Trajectory length		c_Delta Cond	c_Step width along trajectory	c_Mid-distance	c_norm. Force (Delta Cond./basic/diSTep)		d_X	d_Y	d_Resistance in Routh	d_Conductance along trajectory	d_Trajectory length		d_Delta Cond	d_Step width along trajectory	d_Mid-distance	d_norm. Force (Delta Cond./basic/diSTep)
21.4287	0.0466665	21.1874	0.0472079	0.466665		-0.246231	0.246231	21.2578	0.0470416	0		-2.83948e-08	0.000646055	0.000323027	-0.000941812		0	0.0301508	21.4145	0.0466973	0		1.55444e-07	0.00045683	0.000228415	0.00729145		0.246231	-0.246231	21.2578	0.0470416	0		-2.83948e-08	0.000646055	0.000323027	-0.000941812		0.0301508	0.00502513	21.4144	0.0466975	0		1.61317e-07	0.000463047	0.000231524	0.00746534
						-0.246688	0.246688	21.2578	0.0470416	0.000646055		-2.83947e-08	0.000646054	0.000969082	-0.000941812		0	0.0306076	21.4144	0.0466975	0.00045683		1.55444e-07	0.00045683	0.000685244	0.00729145		0.246688	-0.246688	21.2578	0.0470416	0.000646055		-2.83947e-08	0.000646054	0.000969082	-0.000941812		0.0306076	0.00510075	21.4144	0.0466976	0.000463047		1.61315e-07	0.000463043	0.000694569	0.00746532
						-0.247145	0.247145	21.2578	0.0470416	0.00129211		2.83948e-08	0.000646053	0.00161514	0.000941816		0	0.0310644	21.4144	0.0466977	0.000913659		1.55444e-07	0.00045683	0.00114207	0.00729145		0.247145	-0.247145	21.2578	0.0470416	0.00129211		2.83948e-08	0.000646053	0.00161514	0.000941816		0.0310644	0.00517636	21.4143	0.0466978	0.00092609		1.61313e-07	0.000463039	0.00115761	0.00746529
						-0.246688	0.246688	21.2578	0.0470416	0.00193816		-2.83944e-08	0.000646052	0.00226119	-0.000941805		0	0.0315212	21.4143	0.0466978	0.00137049		1.55444e-07	0.00045683	0.0015989	0.00729145		0.246688	-0.246688	21.2578	0.0470416	0.00193816		-2.83944e-08	0.000646052	0.00226119	-0.000941805		0.0315212	0.00525193	21.4142	0.046698	0.00138913		1.61311e-07	0.000463035	0.00162065	0.00746527
						-0.247145	0.247145	21.2578	0.0470416	0.00258421		2.8396e-08	0.000646012	0.00290722	0.000941916		0	0.0319781	21.4142	0.046698	0.00182732		1.55444e-07	0.00045683	0.00205573	0.00729145		0.247145	-0.247145	21.2578	0.0470416	0.00258421		2.8396e-08	0.000646012	0.00290722	0.000941916		0.0319781	0.00532748	21.4141	0.0466981	0.00185216		1.61309e-07	0.000463031	0.00208368	0.00746524
						-0.246688	0.246688	21.2578	0.0470416	0.00323023		-2.8387e-08	0.000645988	0.00355322	-0.000941651		0	0.0324349	21.4141	0.0466981	0.00228415		1.55444e-07	0.00045683	0.00251256	0.00729145		0.246688	-0.246688	21.2578	0.0470416	0.00323023		-2.8387e-08	0.000645988	0.00355322	-0.000941651		0.0324349	0.00540301	21.4141	0.0466983	0.00231519		1.61307e-07	0.000463026	0.00254671	0.00746522
						-0.247145	0.247145	21.2578	0.0470416	0.00387621		2.84236e-08	0.000645068	0.00419875	0.000944211		0	0.0328917	21.4141	0.0466983	0.00274098		1.55444e-07	0.00045683	0.00296939	0.00729145		0.247145	-0.247145	21.2578	0.0470416	0.00387621		2.84236e-08	0.000645068	0.00419875	0.000944211		0.0328917	0.00547851	21.414	0.0466984	0.00277822		1.61305e-07	0.000463022	0.00300973	0.00746519
						-0.246688	0.246689	21.2578	0.0470416	0.00452128		-2.82163e-08	0.000644533	0.00484355	-0.000938103		0	0.0333486	21.414	0.0466984	0.00319781		1.55444e-07	0.00045683	0.00342622	0.00729145		0.246688	-0.246689	21.2578	0.0470416	0.00452128		-2.82163e-08	0.000644533	0.00484355	-0.000938103		0.0333486	0.00555398	21.4139	0.0466986	0.00324124		1.61303e-07	0.000463018	0.00347275	0.00746517
						-0.247143	0.247146	21.2578	0.0470416	0.00516581		2.90395e-08	0.000624396	0.00547801	0.000996608		0	0.0338054	21.4139	0.0466986	0.00365464		1.55444e-07	0.00045683	0.00388305	0.00729145		0.247143	-0.247146	21.2578	0.0470416	0.00516581		2.90395e-08	0.000624396	0.00547801	0.000996608		0.0338054	0.00562943	21.4138	0.0466988	0.00370426		1.61301e-07	0.000463014	0.00393577	0.00746514
						-0.246686	0.246721	21.2578	0.0470416	0.00579021		-2.44517e-08	0.000613319	0.00609687	-0.000854313		0	0.0342622	21.4139	0.0466987	0.00411147		1.55444e-07	0.00045683	0.00433988	0.00729145		0.246686	-0.246721	21.2578	0.0470416	0.00579021		-2.44517e-08	0.000613319	0.00609687	-0.000854313		0.0342622	0.00570486	21.4138	0.0466989	0.00416728		1.61254e-07	0.00046301	0.00439878	0.00746302
						-0.247095	0.247177	21.2578	0.0470416	0.00640353		3.73628e-08	0.000457414	0.00663224	0.00175035		0	0.034719	21.4138	0.0466989	0.0045683		1.55444e-07	0.00045683	0.00479671	0.00729145		0.247095	-0.247177	21.2578	0.0470416	0.00640353		3.73628e-08	0.000457414	0.00663224	0.00175035		0.034719	0.00578025	21.4137	0.0466991	0.00463029		1.61216e-07	0.000463006	0.00486179	0.00746136
						-0.246638	0.247154	21.2578	0.0470416	0.00686094		1.88325e-08	0.000470674	0.00709628	0.000857399		0	0.0351759	21.4137	0.046699	0.00502513		1.79492e-07	0.00045683	0.00525354	0.0084195		0.246638	-0.247154	21.2578	0.0470416	0.00686094		1.88325e-08	0.000470674	0.00709628	0.000857399		0.0351759	0.00585563	21.4136	0.0466992	0.00509329		1.85328e-07	0.000463002	0.00532479	0.00857736
						-0.246525	0.247611	21.2578	0.0470416	0.00733162		3.21366e-08	0.000632889	0.00764806	0.0010881		0	0.0356327	21.4136	0.0466992	0.00548196		1.79492e-07	0.00045683	0.00571037	0.0084195		0.246525	-0.247611	21.2578	0.0470416	0.00733162		3.21366e-08	0.000632889	0.00764806	0.0010881		0.0356327	0.00593097	21.4135	0.0466994	0.00555629		1.85326e-07	0.000462997	0.00578779	0.00857734
						-0.246087	0.248068	21.2578	0.0470417	0.00796451		4.30591e-09	0.000644081	0.00828655	0.000143258		0	0.0360895	21.4135	0.0466994	0.00593878		1.79492e-07	0.00045683	0.0061672	0.0084195		0.246087	-0.248068	21.2578	0.0470417	0.00796451		4.30591e-09	0.000644081	0.00828655	0.000143258		0.0360895	0.00600629	21.4135	0.0466996	0.00601929		1.85323e-07	0.000462992	0.00625079	0.00857732
						-0.245633	0.248525	21.2578	0.0470417	0.00860859		4.27999e-09	0.000645697	0.00893144	0.00014204		0	0.0365464	21.4135	0.0466996	0.00639561		1.79492e-07	0.00045683	0.00662403	0.0084195		0.245633	-0.248525	21.2578	0.0470417	0.00860859		4.27999e-09	0.000645697	0.00893144	0.00014204		0.0365464	0.00608158	21.4134	0.0466998	0.00648228		1.85321e-07	0.000462987	0.00671377	0.0085773
						-0.245176	0.248982	21.2578	0.0470417	0.00925428		4.26884e-09	0.000645869	0.00957722	0.000141632		0	0.0370032	21.4134	0.0466998	0.00685244		1.79492e-07	0.00045683	0.00708086	0.0084195		0.245176	-0.248982	21.2578	0.0470417	0.00925428		4.26884e-09	0.000645869	0.00957722	0.000141632		0.0370032	0.00615683	21.4133	0.0467	0.00694527		1.85318e-07	0.000462982	0.00717676	0.00857729
						-0.24472	0.249438	21.2577	0.0470417	0.00990015		6.71899e-08	0.000645606	0.010223	0.00223013		0	0.03746	21.4133	0.0466999	0.00730927		1.79492e-07	0.00045683	0.00753769	0.0084195		0.24472	-0.249438	21.2577	0.0470417	0.00990015		6.71899e-08	0.000645606	0.010223	0.00223014		0.03746	0.00623206	21.4132	0.0467002	0.00740825		1.85316e-07	0.000462977	0.00763974	0.00857727
						-0.244263	0.249894	21.2577	0.0470417	0.0105458		9.89653e-08	0.00064545	0.0108685	0.00328561		0	0.0379169	21.4132	0.0467001	0.0077661		1.79492e-07	0.00045683	0.00799452	0.0084195		0.244263	-0.249894	21.2577	0.0470417	0.0105458		9.89653e-08	0.00064545	0.0108685	0.00328561		0.0379169	0.00630725	21.4131	0.0467004	0.00787123		1.85314e-07	0.000462972	0.00810271	0.00857725
						-0.243806	0.25035	21.2577	0.0470418	0.0111912		9.89463e-08	0.000645342	0.0115139	0.00328553		0	0.0383737	21.4131	0.0467003	0.00822293		1.79492e-07	0.00045683	0.00845135	0.0084195		0.243806	-0.25035	21.2577	0.0470418	0.0111912		9.89463e-08	0.000645342	0.0115139	0.00328553		0.0383737	0.00638242	21.413	0.0467005	0.0083342		1.853e-07	0.000462967	0.00856568	0.00857672
						-0.243349	0.250806	21.2576	0.0470419	0.0118366		9.83967e-08	0.00064526	0.0121592	0.00326769		0	0.0388305	21.4131	0.0467005	0.00867976		1.79492e-07	0.00045683	0.00890818	0.0084195		0.243349	-0.250806	21.2576	0.0470419	0.0118366		9.83967e-08	0.00064526	0.0121592	0.00326769		0.0388305	0.00645755	21.4129	0.0467007	0.00879717		1.85214e-07	0.000462962	0.00902865	0.00857281
						-0.242892	0.251262	21.2576	0.047042	0.0124818		5.56544e-08	0.000645191	0.0128044	0.00184845		0	0.0392873	21.413	0.0467007	0.00913659		1.79492e-07	0.00045683	0.00936501	0.0084195		0.242892	-0.251262	21.2576	0.047042	0.0124818		5.56544e-08	0.000645191	0.0128044	0.00184845		0.0392873	0.00653266	21.4129	0.0467009	0.00926013		1.85212e-07	0.000462957	0.00949161	0.00857279
						-0.242435	0.251718	21.2576	0.0470421	0.013127		7.05848e-08	0.000644924	0.0134495	0.0023453		0	0.0397442	21.4129	0.0467008	0.00959342		1.79492e-07	0.00045683	0.00982184	0.0084195		0.242435	-0.251718	21.2576	0.0470421	0.013127		7.05849e-08	0.000644924	0.0134495	0.0023453		0.0397442	0.00660773	21.4128	0.0467011	0.00972309		1.85209e-07	0.000462952	0.00995456	0.00857277
						-0.241979	0.252173	21.2575	0.0470422	0.0137719		1.50326e-07	0.000644705	0.0140943	0.00499651		0	0.040201	21.4128	0.046701	0.0100503		2.03605e-07	0.00045683	0.0102787	0.00955057		0.241979	-0.252173	21.2575	0.0470422	0.0137719		1.50326e-07	0.000644705	0.0140943	0.00499651		0.040201	0.00668278	21.4127	0.0467013	0.010186		2.09397e-07	0.000462948	0.0104175	0.00969246
						-0.241522	0.252628	21.2575	0.0470423	0.0144166		1.37071e-07	0.000644518	0.0147389	0.00455728		0	0.0406578	21.4127	0.0467012	0.0105071		2.03605e-07	0.00045683	0.0107355	0.00955057		0.241522	-0.252628	21.2575	0.0470423	0.0144166		1.37071e-07	0.000644518	0.0147389	0.00455728		0.0406578	0.00675779	21.4126	0.0467015	0.010649		2.09394e-07	0.000462942	0.0108805	0.00969245
						-0.241065	0.253082	21.2574	0.0470424	0.0150611		1.07447e-07	0.000644355	0.0153833	0.00357324		0	0.0411147	21.4126	0.0467014	0.0109639		2.03605e-07	0.00045683	0.0111923	0.00955057		0.241065	-0.253082	21.2574	0.0470424	0.0150611		1.07447e-07	0.000644355	0.0153833	0.00357324		0.0411147	0.00683277	21.4125	0.0467017	0.0111119		2.09392e-07	0.000462936	0.0113434	0.00969245
						-0.240608	0.253537	21.2573	0.0470426	0.0157055		1.07421e-07	0.00064422	0.0160276	0.00357314		0	0.0415715	21.4125	0.0467016	0.0114207		2.03605e-07	0.00045683	0.0116492	0.00955057		0.240608	-0.253537	21.2573	0.0470426	0.0157055		1.07421e-07	0.00064422	0.0160276	0.00357314		0.0415715	0.00690772	21.4124	0.0467019	0.0115749		2.09389e-07	0.000462931	0.0118063	0.00969244
						-0.240151	0.253991	21.2573	0.0470427	0.0163497		1.07399e-07	0.000644104	0.0166718	0.00357306		0	0.0420283	21.4124	0.0467018	0.0118776		2.03605e-07	0.00045683	0.012106	0.00955057		0.240151	-0.253991	21.2573	0.0470427	0.0163497		1.07399e-07	0.000644104	0.0166718	0.00357306		0.0420283	0.00698263	21.4123	0.0467021	0.0120378		2.09386e-07	0.000462925	0.0122693	0.00969243
						-0.239694	0.254445	21.2573	0.0470428	0.0169938		1.68582e-07	0.000644002	0.0173158	0.00560943		0	0.0424852	21.4123	0.046702	0.0123344		2.03605e-07	0.00045683	0.0125628	0.00955057		0.239694	-0.254445	21.2573	0.0470428	0.0169938		1.68582e-07	0.000644002	0.0173158	0.00560943		0.0424852	0.0070575	21.4122	0.0467023	0.0125007		2.09383e-07	0.000462919	0.0127322	0.00969242
						-0.239238	0.254899	21.2572	0.0470429	0.0176378		2.02479e-07	0.000643912	0.0179598	0.00673828		0	0.042942	21.4122	0.0467022	0.0127912		2.03605e-07	0.00045683	0.0130196	0.00955057		0.239238	-0.254899	21.2572	0.0470429	0.0176378		2.02479e-07	0.000643912	0.0179598	0.00673828		0.042942	0.00713234	21.4121	0.0467025	0.0129636		2.09307e-07	0.000462913	0.0131951	0.009689
						-0.238781	0.255353	21.2571	0.0470431	0.0182817		2.02452e-07	0.000643831	0.0186037	0.00673821		0	0.0433988	21.4122	0.0467024	0.0132481		2.03605e-07	0.00045683	0.0134765	0.00955057		0.238781	-0.255353	21.2571	0.0470431	0.0182817		2.02452e-07	0.000643831	0.0186037	0.00673821		0.0433988	0.00720714	21.412	0.0467027	0.0134266		2.09267e-07	0.000462908	0.013658	0.00968729
						-0.238324	0.255806	21.257	0.0470433	0.0189256		2.02427e-07	0.000643758	0.0192475	0.00673816		0	0.0438556	21.4121	0.0467027	0.0137049		2.03605e-07	0.00045683	0.0139333	0.00955057		0.238324	-0.255806	21.257	0.0470433	0.0189256		2.02427e-07	0.000643758	0.0192475	0.00673816		0.0438556	0.00728191	21.4119	0.046703	0.0138895		2.09265e-07	0.000462902	0.0141209	0.00968729
						-0.237867	0.25626	21.2569	0.0470435	0.0195693		1.60858e-07	0.00064369	0.0198912	0.00535501		0	0.0443125	21.412	0.0467029	0.0141617		2.03605e-07	0.00045683	0.0143901	0.00955057		0.237867	-0.25626	21.2569	0.0470435	0.0195693		1.60858e-07	0.00064369	0.0198912	0.00535501		0.0443125	0.00735664	21.4118	0.0467032	0.0143524		2.09262e-07	0.000462896	0.0145838	0.00968728
						-0.23741	0.256713	21.2568	0.0470437	0.020213		1.70579e-07	0.000643483	0.0205348	0.00568046		0	0.0447693	21.4119	0.0467031	0.0146185		2.03605e-07	0.00045683	0.014847	0.00955057		0.23741	-0.256713	21.2568	0.0470437	0.020213		1.70579e-07	0.000643483	0.0205348	0.00568046		0.0447693	0.00743134	21.4117	0.0467034	0.0148153		2.09259e-07	0.000462891	0.0150467	0.00968727
						-0.236954	0.257167	21.2568	0.0470439	0.0208565		2.54152e-07	0.000643287	0.0211781	0.00846612		0	0.0452261	21.4118	0.0467033	0.0150754		2.27796e-07	0.00045683	0.0153038	0.0106853		0.236954	-0.257167	21.2568	0.0470439	0.0208565		2.54152e-07	0.000643287	0.0211781	0.00846612		0.0452261	0.00750601	21.4116	0.0467036	0.0152781		2.33538e-07	0.000462885	0.0155096	0.0108113
						-0.236497	0.25762	21.2566	0.0470441	0.0214998		2.4088e-07	0.000643104	0.0218213	0.00802628		0	0.045683	21.4117	0.0467035	0.0155322		2.27796e-07	0.00045683	0.0157606	0.0106853		0.236497	-0.25762	21.2566	0.0470441	0.0214998		2.4088e-07	0.000643104	0.0218213	0.00802628		0.045683	0.00758063	21.4115	0.0467038	0.015741		2.33534e-07	0.000462879	0.0159725	0.0108113
						-0.23604	0.258072	21.2565	0.0470444	0.0221429		2.11255e-07	0.000642948	0.0224644	0.00704087		0	0.0461398	21.4116	0.0467037	0.015989		2.27796e-07	0.00045683	0.0162175	0.0106853		0.23604	-0.258072	21.2565	0.0470444	0.0221429		2.11255e-07	0.000642948	0.0224644	0.00704087		0.0461398	0.00765522	21.4114	0.0467041	0.0162039		2.33531e-07	0.000462872	0.0164353	0.0108113
						-0.235583	0.258525	21.2564	0.0470446	0.0227858		2.11216e-07	0.000642835	0.0231073	0.00704079		0	0.0465966	21.4115	0.0467039	0.0164459		2.27796e-07	0.00045683	0.0166743	0.0106853		0.235583	-0.258525	21.2564	0.0470446	0.0227858		2.11216e-07	0.000642835	0.0231073	0.00704079		0.0465966	0.00772977	21.4113	0.0467043	0.0166668		2.33528e-07	0.000462866	0.0168982	0.0108113
						-0.235126	0.258977	21.2563	0.0470448	0.0234287		2.11179e-07	0.000642732	0.02375	0.00704071		0	0.0470534	21.4114	0.0467042	0.0169027		2.27796e-07	0.00045683	0.0171311	0.0106853		0.235126	-0.258977	21.2563	0.0470448	0.0234287		2.11179e-07	0.000642732	0.02375	0.00704071		0.0470534	0.00780428	21.4112	0.0467045	0.0171297		2.33498e-07	0.000462859	0.0173611	0.0108101
						-0.234669	0.259429	21.2562	0.047045	0.0240714		2.68612e-07	0.000642636	0.0243927	0.00895685		0	0.0475103	21.4113	0.0467044	0.0173595		2.27796e-07	0.00045683	0.0175879	0.0106853		0.234669	-0.259429	21.2562	0.047045	0.0240714		2.68612e-07	0.000642636	0.0243927	0.00895685		0.0475103	0.00787874	21.4111	0.0467048	0.0175925		2.33395e-07	0.000462853	0.0178239	0.0108055
						-0.234213	0.259881	21.2561	0.0470453	0.024714		3.07304e-07	0.000642546	0.0250353	0.0102485		0	0.0479671	21.4112	0.0467046	0.0178164		2.27796e-07	0.00045683	0.0180448	0.0106853		0.234213	-0.259881	21.2561	0.0470453	0.024714		3.07304e-07	0.000642546	0.0250353	0.0102485		0.0479671	0.00795317	21.411	0.046705	0.0180554		2.33392e-07	0.000462846	0.0182868	0.0108055
						-0.233756	0.260333	21.256	0.0470456	0.0253566		3.07262e-07	0.000642462	0.0256778	0.0102484		0	0.0484239	21.411	0.0467049	0.0182732		2.27796e-07	0.00045683	0.0185016	0.0106853		0.233756	-0.260333	21.256	0.0470456	0.0253566		3.07262e-07	0.000642462	0.0256778	0.0102484		0.0484239	0.00802755	21.4109	0.0467052	0.0185182		2.33389e-07	0.00046284	0.0187496	0.0108055
						-0.233299	0.260785	21.2558	0.0470459	0.0259991		3.07223e-07	0.000642383	0.0263202	0.0102484		0	0.0488808	21.4109	0.0467051	0.01873		2.27796e-07	0.00045683	0.0189584	0.0106853		0.233299	-0.260785	21.2558	0.0470459	0.0259991		3.07223e-07	0.000642383	0.0263202	0.0102484		0.0488808	0.0081019	21.4108	0.0467055	0.018981		2.33386e-07	0.000462833	0.0192125	0.0108055
						-0.232842	0.261236	21.2557	0.0470462	0.0266414		2.69922e-07	0.000642309	0.0269626	0.00900511		0	0.0493376	21.4108	0.0467053	0.0191868		2.27796e-07	0.00045683	0.0194153	0.0106853		0.232842	-0.261236	21.2557	0.0470462	0.0266414		2.69922e-07	0.000642309	0.0269626	0.00900511		0.0493376	0.0081762	21.4107	0.0467057	0.0194439		2.33383e-07	0.000462827	0.0196753	0.0108055
						-0.232385	0.261688	21.2556	0.0470465	0.0272837		2.69371e-07	0.000642126	0.0276048	0.0089893		0	0.0497944	21.4107	0.0467055	0.0196437		2.27796e-07	0.00045683	0.0198721	0.0106853		0.232385	-0.261688	21.2556	0.0470465	0.0272837		2.69371e-07	0.000642126	0.0276048	0.0089893		0.0497944	0.00825047	21.4106	0.0467059	0.0199067		2.3338e-07	0.00046282	0.0201381	0.0108055
						-0.231928	0.262139	21.2555	0.0470467	0.0279259		3.59744e-07	0.000641933	0.0282468	0.0120088		0	0.0502513	21.4106	0.0467058	0.0201005		2.5208e-07	0.00045683	0.0203289	0.0118244		0.231928	-0.262139	21.2555	0.0470467	0.0279259		3.59744e-07	0.000641933	0.0282468	0.0120088		0.0502513	0.00832469	21.4105	0.0467062	0.0203695		2.57764e-07	0.000462814	0.0206009	0.0119347
						-0.231472	0.26259	21.2553	0.0470471	0.0285678		3.46401e-07	0.00064175	0.0288887	0.0115667		0	0.0507081	21.4105	0.046706	0.0205573		2.5208e-07	0.00045683	0.0207857	0.0118244		0.231472	-0.26259	21.2553	0.0470471	0.0285678		3.46401e-07	0.00064175	0.0288887	0.0115667		0.0507081	0.00839888	21.4103	0.0467064	0.0208323		2.57761e-07	0.000462806	0.0210637	0.0119347
						-0.231015	0.263041	21.2551	0.0470474	0.0292096		3.1666e-07	0.000641594	0.0295304	0.0105762		0	0.0511649	21.4104	0.0467063	0.0210142		2.5208e-07	0.00045683	0.0212426	0.0118244		0.231015	-0.263041	21.2551	0.0470474	0.0292096		3.1666e-07	0.000641594	0.0295304	0.0105762		0.0511649	0.00847302	21.4102	0.0467067	0.0212951		2.57757e-07	0.000462799	0.0215265	0.0119348
						-0.230558	0.263491	21.255	0.0470478	0.0298511		3.16606e-07	0.000641488	0.0301719	0.0105761		0	0.0516217	21.4103	0.0467065	0.021471		2.5208e-07	0.00045683	0.0216994	0.0118244		0.230558	-0.263491	21.255	0.0470478	0.0298511		3.16606e-07	0.000641488	0.0301719	0.0105761		0.0516217	0.00854711	21.4101	0.0467069	0.0217579		2.57645e-07	0.000462792	0.0219893	0.0119298
						-0.230101	0.263942	21.2549	0.0470481	0.0304926		3.16554e-07	0.000641389	0.0308133	0.010576		0	0.0520786	21.4102	0.0467068	0.0219278		2.5208e-07	0.00045683	0.0221562	0.0118244		0.230101	-0.263942	21.2549	0.0470481	0.0304926		3.16554e-07	0.000641389	0.0308133	0.010576		0.0520786	0.00862116	21.41	0.0467072	0.0222207		2.57606e-07	0.000462784	0.0224521	0.0119281
						-0.229644	0.264392	21.2547	0.0470484	0.031134		3.68189e-07	0.000641294	0.0314547	0.0123029		0	0.0525354	21.4101	0.046707	0.0223847		2.5208e-07	0.00045683	0.0226131	0.0118244		0.229644	-0.264392	21.2547	0.0470484	0.031134		3.68189e-07	0.000641294	0.0314547	0.0123029		0.0525354	0.00869516	21.4099	0.0467074	0.0226835		2.57602e-07	0.000462777	0.0229149	0.0119281
						-0.229187	0.264842	21.2545	0.0470488	0.0317753		4.14389e-07	0.000641204	0.0320959	0.0138486		0	0.0529922	21.4099	0.0467073	0.0228415		2.5208e-07	0.00045683	0.0230699	0.0118244		0.229187	-0.264842	21.2545	0.0470488	0.0317753		4.14389e-07	0.000641204	0.0320959	0.0138486		0.0529922	0.00876911	21.4097	0.0467077	0.0231463		2.57599e-07	0.00046277	0.0233777	0.0119282
						-0.228731	0.265292	21.2544	0.0470492	0.0324165		4.14332e-07	0.000641119	0.0327371	0.0138486		0	0.0534491	21.4098	0.0467075	0.0232983		2.5208e-07	0.00045683	0.0235267	0.0118244		0.228731	-0.265292	21.2544	0.0470492	0.0324165		4.14332e-07	0.000641119	0.0327371	0.0138486		0.0534491	0.00884302	21.4096	0.046708	0.0236091		2.57595e-07	0.000462762	0.0238405	0.0119282
						-0.228274	0.265742	21.2542	0.0470496	0.0330576		4.14277e-07	0.000641037	0.0333782	0.0138485		0	0.0539059	21.4097	0.0467078	0.0237551		2.5208e-07	0.00045683	0.0239836	0.0118244		0.228274	-0.265742	21.2542	0.0470496	0.0330576		4.14277e-07	0.000641037	0.0333782	0.0138485		0.0539059	0.00891688	21.4095	0.0467082	0.0240718		2.57592e-07	0.000462755	0.0243032	0.0119282
						-0.227817	0.266191	21.254	0.04705	0.0336987		3.83368e-07	0.000640959	0.0340192	0.0128168		0	0.0543627	21.4096	0.046708	0.024212		2.5208e-07	0.00045683	0.0244404	0.0118244		0.227817	-0.266191	21.254	0.04705	0.0336987		3.83368e-07	0.000640959	0.0340192	0.0128168		0.0543627	0.0089907	21.4094	0.0467085	0.0245346		2.57588e-07	0.000462748	0.024766	0.0119282
						-0.22736	0.266641	21.2538	0.0470504	0.0343396		3.69281e-07	0.000640799	0.03466	0.012349		0	0.0548196	21.4095	0.0467083	0.0246688		2.5208e-07	0.00045683	0.0248972	0.0118244		0.22736	-0.266641	21.2538	0.0470504	0.0343396		3.69281e-07	0.000640799	0.03466	0.012349		0.0548196	0.00906447	21.4093	0.0467087	0.0249973		2.57585e-07	0.000462741	0.0252287	0.0119283
						-0.226903	0.26709	21.2536	0.0470508	0.0349804		4.66558e-07	0.000640607	0.0353007	0.0156066		0	0.0552764	21.4094	0.0467085	0.0251256		2.76473e-07	0.00045683	0.025354	0.0129686		0.226903	-0.26709	21.2536	0.0470508	0.0349804		4.66558e-07	0.000640607	0.0353007	0.0156066		0.0552764	0.0091382	21.4092	0.046709	0.0254601		2.82094e-07	0.000462733	0.0256914	0.0130635
						-0.226446	0.267539	21.2534	0.0470512	0.035621		4.54617e-07	0.000640422	0.0359413	0.0152116		0	0.0557332	21.4092	0.0467088	0.0255825		2.76473e-07	0.00045683	0.0258109	0.0129686		0.226446	-0.267539	21.2534	0.0470512	0.035621		4.54617e-07	0.000640422	0.0359413	0.0152116		0.0557332	0.00921188	21.409	0.0467093	0.0259228		2.82044e-07	0.000462725	0.0261542	0.0130614
						-0.22599	0.267988	21.2532	0.0470517	0.0362615		4.24642e-07	0.000640266	0.0365816	0.0142121		0	0.05619	21.4091	0.0467091	0.0260393		2.76473e-07	0.00045683	0.0262677	0.0129686		0.22599	-0.267988	21.2532	0.0470517	0.0362615		4.24642e-07	0.000640266	0.0365816	0.0142121		0.05619	0.00928551	21.4089	0.0467096	0.0263855		2.81923e-07	0.000462717	0.0266169	0.013056
						-0.225533	0.268437	21.253	0.0470521	0.0369017		4.24572e-07	0.000640164	0.0372218	0.014212		0	0.0566469	21.409	0.0467094	0.0264961		2.76473e-07	0.00045683	0.0267245	0.0129686		0.225533	-0.268437	21.253	0.0470521	0.0369017		4.24572e-07	0.000640164	0.0372218	0.014212		0.0566469	0.00935909	21.4088	0.0467098	0.0268483		2.81919e-07	0.000462709	0.0270796	0.013056
						-0.225076	0.268885	21.2528	0.0470525	0.0375419		4.24506e-07	0.000640066	0.0378619	0.014212		0	0.0571037	21.4089	0.0467096	0.0269529		2.76473e-07	0.00045683	0.0271814	0.0129686		0.225076	-0.268885	21.2528	0.0470525	0.0375419		4.24506e-07	0.000640066	0.0378619	0.014212		0.0571037	0.00943261	21.4086	0.0467101	0.027311		2.81915e-07	0.0004627	0.0275423	0.0130561
						-0.224619	0.269334	21.2527	0.0470529	0.038182		4.68072e-07	0.000639972	0.038502	0.0156728		0	0.0575605	21.4087	0.0467099	0.0274098		2.76473e-07	0.00045683	0.0276382	0.0129686		0.224619	-0.269334	21.2527	0.0470529	0.038182		4.68072e-07	0.000639972	0.038502	0.0156728		0.0575605	0.00950608	21.4085	0.0467104	0.0277737		2.81911e-07	0.000462692	0.028005	0.0130561
						-0.224162	0.269782	21.2524	0.0470534	0.0388219		5.24748e-07	0.000639882	0.0391419	0.017573		0	0.0580174	21.4086	0.0467102	0.0278666		2.76473e-07	0.00045683	0.028095	0.0129686		0.224162	-0.269782	21.2524	0.0470534	0.0388219		5.24748e-07	0.000639882	0.0391419	0.017573		0.0580174	0.00957951	21.4084	0.0467107	0.0282364		2.81907e-07	0.000462684	0.0284677	0.0130562
						-0.223705	0.27023	21.2522	0.0470539	0.0394618		5.24675e-07	0.000639796	0.0397817	0.0175729		0	0.0584742	21.4085	0.0467105	0.0283234		2.76473e-07	0.00045683	0.0285519	0.0129686		0.223705	-0.27023	21.2522	0.0470539	0.0394618		5.24675e-07	0.000639796	0.0397817	0.0175729		0.0584742	0.00965288	21.4083	0.046711	0.028699		2.81903e-07	0.000462676	0.0289304	0.0130562
						-0.223249	0.270678	21.252	0.0470545	0.0401016		5.24605e-07	0.000639712	0.0404215	0.0175729		0	0.058931	21.4083	0.0467108	0.0287803		2.76473e-07	0.00045683	0.0290087	0.0129686		0.223249	-0.270678	21.252	0.0470545	0.0401016		5.24605e-07	0.000639712	0.0404215	0.0175729		0.058931	0.0097262	21.4081	0.0467112	0.0291617		2.81899e-07	0.000462668	0.029393	0.0130563
						-0.222792	0.271126	21.2517	0.047055	0.0407413		5.02393e-07	0.000639632	0.0410611	0.0168309		0	0.0593878	21.4082	0.046711	0.0292371		2.76473e-07	0.00045683	0.0294655	0.0129686		0.222792	-0.271126	21.2517	0.047055	0.0407413		5.02393e-07	0.000639632	0.0410611	0.0168309		0.0593878	0.00979946	21.408	0.0467115	0.0296244		2.81895e-07	0.000462659	0.0298557	0.0130563
						-0.222335	0.271573	21.2515	0.0470555	0.041381		4.7865e-07	0.000639496	0.0417007	0.0160389		0	0.0598447	21.4081	0.0467113	0.0296939		2.76473e-07	0.00045683	0.0299223	0.0129686		0.222335	-0.271573	21.2515	0.0470555	0.041381		4.7865e-07	0.000639496	0.0417007	0.0160389		0.0598447	0.00987268	21.4079	0.0467118	0.030087		2.81891e-07	0.000462651	0.0303184	0.0130564
						-0.221878	0.272021	21.2513	0.047056	0.0420205		5.67998e-07	0.000639304	0.0423401	0.0190386		0	0.0603015	21.408	0.0467116	0.0301508		3.00997e-07	0.00045683	0.0303792	0.014119		0.221878	-0.272021	21.2513	0.047056	0.0420205		5.67998e-07	0.000639304	0.0423401	0.0190386		0.0603015	0.00994584	21.4077	0.0467121	0.0305497		3.06398e-07	0.000462643	0.030781	0.0141917
						-0.221421	0.272468	21.251	0.0470565	0.0426598		5.66567e-07	0.000639118	0.0429793	0.0189961		0	0.0607583	21.4078	0.0467119	0.0306076		3.00997e-07	0.00045683	0.030836	0.014119		0.221421	-0.272468	21.251	0.0470565	0.0426598		5.66567e-07	0.000639118	0.0429793	0.0189961		0.0607583	0.010019	21.4076	0.0467124	0.0310123		3.08505e-07	0.000462634	0.0312437	0.0142896
						-0.220964	0.272915	21.2508	0.0470571	0.0432989		5.36235e-07	0.000638961	0.0436184	0.0179836		0	0.0612152	21.4077	0.0467122	0.0310644		3.00997e-07	0.00045683	0.0312928	0.014119		0.220964	-0.272915	21.2508	0.0470571	0.0432989		5.36235e-07	0.000638961	0.0436184	0.0179836		0.0612152	0.010092	21.4075	0.0467127	0.031475		3.10107e-07	0.000462625	0.0317063	0.0143641
						-0.220508	0.273362	21.2505	0.0470576	0.0439378		5.36149e-07	0.00063886	0.0442573	0.0179835		0	0.061672	21.4076	0.0467125	0.0315212		3.00997e-07	0.00045683	0.0317497	0.014119		0.220508	-0.273362	21.2505	0.0470576	0.0439378		5.36149e-07	0.00063886	0.0442573	0.0179835		0.061672	0.010165	21.4073	0.046713	0.0319376		3.101e-07	0.000462616	0.0321689	0.014364
						-0.220051	0.273808	21.2503	0.0470582	0.0445767		5.36066e-07	0.000638763	0.0448961	0.0179835		0	0.0621288	21.4074	0.0467128	0.0319781		3.00997e-07	0.00045683	0.0322065	0.014119		0.220051	-0.273808	21.2503	0.0470582	0.0445767		5.36066e-07	0.000638763	0.0448961	0.0179835		0.0621288	0.0102379	21.4072	0.0467133	0.0324002		3.10092e-07	0.000462607	0.0326315	0.014364
						-0.219594	0.274255	21.25	0.0470587	0.0452155		5.68962e-07	0.00063867	0.0455348	0.0190898		0	0.0625857	21.4073	0.0467131	0.0324349		3.00997e-07	0.00045683	0.0326633	0.014119		0.219594	-0.274255	21.25	0.0470587	0.0452155		5.68962e-07	0.00063867	0.0455348	0.0190898		0.0625857	0.0103108	21.407	0.0467136	0.0328628		3.10085e-07	0.000462598	0.0330941	0.0143639
						-0.219137	0.274701	21.2498	0.0470593	0.0458541		6.39461e-07	0.00063858	0.0461734	0.0214582		0	0.0630425	21.4071	0.0467134	0.0328917		3.00997e-07	0.00045683	0.0331201	0.014119		0.219137	-0.274701	21.2498	0.0470593	0.0458541		6.39461e-07	0.00063858	0.0461734	0.0214582		0.0630425	0.0103837	21.4069	0.0467139	0.0333254		3.10078e-07	0.000462589	0.0335567	0.0143638
						-0.21868	0.275147	21.2495	0.0470599	0.0464927		6.39371e-07	0.000638492	0.046812	0.0214582		0	0.0634993	21.407	0.0467137	0.0333486		3.00997e-07	0.00045683	0.033577	0.014119		0.21868	-0.275147	21.2495	0.0470599	0.0464927		6.39371e-07	0.000638492	0.046812	0.0214582		0.0634993	0.0104564	21.4067	0.0467143	0.033788		3.10071e-07	0.00046258	0.0340193	0.0143638
						-0.218223	0.275593	21.2492	0.0470606	0.0471312		6.39285e-07	0.000638408	0.0474504	0.0214581		0	0.0639561	21.4069	0.046714	0.0338054		3.00997e-07	0.00045683	0.0340338	0.014119		0.218223	-0.275593	21.2492	0.0470606	0.0471312		6.39285e-07	0.000638408	0.0474504	0.0214581		0.0639561	0.0105291	21.4066	0.0467146	0.0342506		3.10063e-07	0.000462571	0.0344819	0.0143637
						-0.217767	0.276039	21.2489	0.0470612	0.0477696		6.28327e-07	0.000638326	0.0480888	0.021093		0	0.064413	21.4067	0.0467143	0.0342622		3.00997e-07	0.00045683	0.0344906	0.014119		0.217767	-0.276039	21.2489	0.0470612	0.0477696		6.28327e-07	0.000638326	0.0480888	0.021093		0.064413	0.0106018	21.4065	0.0467149	0.0347132		3.09959e-07	0.000462562	0.0349444	0.0143592
						-0.21731	0.276485	21.2486	0.0470618	0.0484079		5.92154e-07	0.000638219	0.048727	0.019882		0	0.0648698	21.4066	0.0467146	0.034719		3.00997e-07	0.00045683	0.0349475	0.014119		0.21731	-0.276485	21.2486	0.0470618	0.0484079		5.92154e-07	0.000638219	0.048727	0.019882		0.0648698	0.0106744	21.4063	0.0467152	0.0351757		3.09742e-07	0.000462553	0.035407	0.0143494
						-0.216853	0.276931	21.2484	0.0470624	0.0490462		6.71154e-07	0.000638025	0.0493652	0.0225413		0	0.0653266	21.4064	0.0467149	0.0351759		3.25672e-07	0.00045683	0.0354043	0.0152764		0.216853	-0.276931	21.2484	0.0470624	0.0490462		6.71154e-07	0.000638025	0.0493652	0.0225413		0.0653266	0.0107469	21.4062	0.0467155	0.0356383		3.34649e-07	0.000462544	0.0358695	0.0155036
						-0.216396	0.277376	21.2481	0.0470631	0.0496842		6.83364e-07	0.000637837	0.0500031	0.0229582		0	0.0657835	21.4063	0.0467152	0.0356327		3.25672e-07	0.00045683	0.0358611	0.0152764		0.216396	-0.277376	21.2481	0.0470631	0.0496842		6.83364e-07	0.000637837	0.0500031	0.0229582		0.0657835	0.0108194	21.406	0.0467158	0.0361008		3.34641e-07	0.000462534	0.0363321	0.0155036
						-0.215939	0.277821	21.2478	0.0470638	0.050322		6.52546e-07	0.000637678	0.0506409	0.0219283		0	0.0662403	21.4062	0.0467155	0.0360895		3.25672e-07	0.00045683	0.036318	0.0152764		0.215939	-0.277821	21.2478	0.0470638	0.050322		6.52546e-07	0.000637678	0.0506409	0.0219283		0.0662403	0.0108918	21.4059	0.0467162	0.0365633		3.34633e-07	0.000462524	0.0367946	0.0155035
						-0.215483	0.278266	21.2475	0.0470644	0.0509597		6.52442e-07	0.000637579	0.0512785	0.0219282		0	0.0666971	21.406	0.0467159	0.0365464		3.25672e-07	0.00045683	0.0367748	0.0152764		0.215483	-0.278266	21.2475	0.0470644	0.0509597		6.52442e-07	0.000637579	0.0512785	0.0219282		0.0666971	0.0109642	21.4057	0.0467165	0.0370259		3.34625e-07	0.000462514	0.0372571	0.0155035
						-0.215026	0.278711	21.2472	0.0470651	0.0515973		6.52342e-07	0.000637482	0.051916	0.0219282		0	0.067154	21.4059	0.0467162	0.0370032		3.25672e-07	0.00045683	0.0372316	0.0152764		0.215026	-0.278711	21.2472	0.0470651	0.0515973		6.52342e-07	0.000637482	0.051916	0.0219282		0.067154	0.0110365	21.4056	0.0467168	0.0374884		3.34617e-07	0.000462504	0.0377196	0.0155034
						-0.214569	0.279156	21.2469	0.0470657	0.0522348		6.71516e-07	0.000637389	0.0525535	0.022576		0	0.0676108	21.4057	0.0467165	0.03746		3.25672e-07	0.00045683	0.0376884	0.0152764		0.214569	-0.279156	21.2469	0.0470657	0.0522348		6.71516e-07	0.000637389	0.0525535	0.022576		0.0676108	0.0111087	21.4054	0.0467172	0.0379509		3.34609e-07	0.000462494	0.0381821	0.0155034
						-0.214112	0.2796	21.2466	0.0470664	0.0528721		7.59699e-07	0.000637298	0.0531908	0.0255443		0	0.0680676	21.4056	0.0467168	0.0379169		3.25672e-07	0.00045683	0.0381453	0.0152764		0.214112	-0.2796	21.2466	0.0470664	0.0528721		7.59699e-07	0.000637298	0.0531908	0.0255443		0.0680676	0.0111808	21.4053	0.0467175	0.0384134		3.34601e-07	0.000462484	0.0386446	0.0155033
						-0.213655	0.280045	21.2462	0.0470672	0.0535094		7.59592e-07	0.00063721	0.053828	0.0255442		0	0.0685244	21.4054	0.0467172	0.0383737		3.25672e-07	0.00045683	0.0386021	0.0152764		0.213655	-0.280045	21.2462	0.0470672	0.0535094		7.59592e-07	0.00063721	0.053828	0.0255442		0.0685244	0.0112529	21.4051	0.0467178	0.0388759		3.34593e-07	0.000462474	0.0391071	0.0155033
						-0.213198	0.280489	21.2459	0.0470679	0.0541467		7.59488e-07	0.000637124	0.0544652	0.0255442		0	0.0689813	21.4053	0.0467175	0.0388305		3.25672e-07	0.00045683	0.0390589	0.0152764		0.213198	-0.280489	21.2459	0.0470679	0.0541467		7.59488e-07	0.000637124	0.0544652	0.0255442		0.0689813	0.011325	21.4049	0.0467182	0.0393383		3.34303e-07	0.000462464	0.0395696	0.0154902
						-0.212742	0.280933	21.2455	0.0470687	0.0547838		7.59386e-07	0.00063704	0.0551023	0.0255441		0	0.0694381	21.4051	0.0467178	0.0392873		3.25672e-07	0.00045683	0.0395158	0.0152764		0.212742	-0.280933	21.2455	0.0470687	0.0547838		7.59386e-07	0.00063704	0.0551023	0.0255441		0.0694381	0.0113969	21.4048	0.0467185	0.0398008		3.34233e-07	0.000462454	0.040032	0.0154873
						-0.212285	0.281377	21.2452	0.0470694	0.0554208		7.14221e-07	0.000636959	0.0557393	0.0240279		0	0.0698949	21.405	0.0467182	0.0397442		3.25672e-07	0.00045683	0.0399726	0.0152764		0.212285	-0.281377	21.2452	0.0470694	0.0554208		7.14221e-07	0.000636959	0.0557393	0.0240279		0.0698949	0.0114689	21.4046	0.0467188	0.0402633		3.34225e-07	0.000462444	0.0404945	0.0154873
						-0.211828	0.281821	21.2449	0.0470702	0.0560578		7.76695e-07	0.000636772	0.0563762	0.0261374		0	0.0703518	21.4048	0.0467185	0.040201		3.50524e-07	0.00045683	0.0404294	0.0164422		0.211828	-0.281821	21.2449	0.0470702	0.0560578		7.76695e-07	0.000636772	0.0563762	0.0261374		0.0703518	0.0115407	21.4045	0.0467192	0.0407257		3.59338e-07	0.000462434	0.0409569	0.0166513
						-0.211371	0.282264	21.2445	0.0470709	0.0566945		8.06224e-07	0.000636581	0.0570128	0.0271392		0	0.0708086	21.4046	0.0467188	0.0406578		3.50524e-07	0.00045683	0.0408862	0.0164422		0.211371	-0.282264	21.2445	0.0470709	0.0566945		8.06224e-07	0.000636581	0.0570128	0.0271392		0.0708086	0.0116125	21.4043	0.0467195	0.0411881		3.59329e-07	0.000462423	0.0414193	0.0166513
						-0.210914	0.282708	21.2442	0.0470717	0.0573311		7.74778e-07	0.00063642	0.0576493	0.0260873		0	0.0712654	21.4045	0.0467192	0.0411147		3.50524e-07	0.00045683	0.0413431	0.0164422		0.210914	-0.282708	21.2442	0.0470717	0.0573311		7.74778e-07	0.00063642	0.0576493	0.0260873		0.0712654	0.0116842	21.4042	0.0467199	0.0416506		3.5932e-07	0.000462412	0.0418818	0.0166513
						-0.210457	0.283151	21.2438	0.0470725	0.0579675		7.74655e-07	0.000636321	0.0582857	0.0260872		0	0.0717222	21.4043	0.0467195	0.0415715		3.50524e-07	0.00045683	0.0417999	0.0164422		0.210457	-0.283151	21.2438	0.0470725	0.0579675		7.74655e-07	0.000636321	0.0582857	0.0260872		0.0717222	0.0117558	21.404	0.0467203	0.042113		3.59311e-07	0.000462401	0.0423442	0.0166513
						-0.210001	0.283594	21.2435	0.0470733	0.0586039		7.74536e-07	0.000636224	0.058922	0.0260872		0	0.0721791	21.4042	0.0467199	0.0420283		3.50524e-07	0.00045683	0.0422567	0.0164422		0.210001	-0.283594	21.2435	0.0470733	0.0586039		7.74536e-07	0.000636224	0.058922	0.0260872		0.0721791	0.0118274	21.4038	0.0467206	0.0425754		3.59302e-07	0.00046239	0.0428066	0.0166512
						-0.209544	0.284037	21.2431	0.0470741	0.0592401		7.76348e-07	0.00063613	0.0595582	0.026152		0	0.0726359	21.404	0.0467202	0.0424852		3.50524e-07	0.00045683	0.0427136	0.0164422		0.209544	-0.284037	21.2431	0.0470741	0.0592401		7.76348e-07	0.00063613	0.0595582	0.026152		0.0726359	0.0118989	21.4037	0.046721	0.0430378		3.59293e-07	0.000462379	0.043269	0.0166512
						-0.209087	0.284479	21.2428	0.0470748	0.0598762		8.86749e-07	0.000636038	0.0601942	0.0298753		0	0.0730927	21.4038	0.0467206	0.042942		3.50524e-07	0.00045683	0.0431704	0.0164422		0.209087	-0.284479	21.2428	0.0470748	0.0598762		8.86749e-07	0.000636038	0.0601942	0.0298753		0.0730927	0.0119703	21.4035	0.0467213	0.0435001		3.59166e-07	0.000462368	0.0437313	0.0166457
						-0.20863	0.284922	21.2424	0.0470757	0.0605123		8.86622e-07	0.000635949	0.0608302	0.0298753		0	0.0735496	21.4037	0.0467209	0.0433988		3.50524e-07	0.00045683	0.0436272	0.0164422		0.20863	-0.284922	21.2424	0.0470757	0.0605123		8.86622e-07	0.000635949	0.0608302	0.0298753		0.0735496	0.0120417	21.4033	0.0467217	0.0439625		3.58893e-07	0.000462358	0.0441937	0.0166335
						-0.208173	0.285364	21.242	0.0470766	0.0611482		8.86499e-07	0.000635862	0.0614661	0.0298752		0	0.0740064	21.4035	0.0467213	0.0438556		3.50524e-07	0.00045683	0.0440841	0.0164422		0.208173	-0.285364	21.242	0.0470766	0.0611482		8.86499e-07	0.000635862	0.0614661	0.0298752		0.0740064	0.0121129	21.4032	0.046722	0.0444249		3.58885e-07	0.000462347	0.044656	0.0166334
						-0.207716	0.285806	21.2416	0.0470775	0.0617841		8.86379e-07	0.000635777	0.062102	0.0298751		0	0.0744632	21.4034	0.0467216	0.0443125		3.50524e-07	0.00045683	0.0445409	0.0164422		0.207716	-0.285806	21.2416	0.0470775	0.0617841		8.86379e-07	0.000635777	0.062102	0.0298751		0.0744632	0.0121842	21.403	0.0467224	0.0448872		3.58876e-07	0.000462336	0.0451184	0.0166334
						-0.20726	0.286249	21.2412	0.0470784	0.0624198		8.56985e-07	0.000635694	0.0627377	0.0288882		0	0.0749201	21.4032	0.046722	0.0447693		3.50524e-07	0.00045683	0.0449977	0.0164422		0.20726	-0.286249	21.2412	0.0470784	0.0624198		8.56985e-07	0.000635694	0.0627377	0.0288882		0.0749201	0.0122553	21.4028	0.0467228	0.0453495		3.58867e-07	0.000462325	0.0455807	0.0166334
						-0.206803	0.286691	21.2408	0.0470792	0.0630555		8.85253e-07	0.000635545	0.0633733	0.0298481		0	0.0753769	21.403	0.0467223	0.0452261		3.7558e-07	0.00045683	0.0454545	0.0176175		0.206803	-0.286691	21.2408	0.0470792	0.0630555		8.85253e-07	0.000635545	0.0633733	0.0298481		0.0753769	0.0123264	21.4027	0.0467231	0.0458119		3.84215e-07	0.000462314	0.046043	0.0178087
						-0.206346	0.287133	21.2404	0.0470801	0.0636911		9.36489e-07	0.000635351	0.0640088	0.0315852		0	0.0758337	21.4029	0.0467227	0.045683		3.7558e-07	0.00045683	0.0459114	0.0176175		0.206346	-0.287133	21.2404	0.0470801	0.0636911		9.36489e-07	0.000635351	0.0640088	0.0315852		0.0758337	0.0123974	21.4025	0.0467235	0.0462742		3.84205e-07	0.000462302	0.0465053	0.0178087
						-0.205889	0.287574	21.24	0.0470811	0.0643264		9.04263e-07	0.000635188	0.064644	0.0305062		0	0.0762905	21.4027	0.0467231	0.0461398		3.7558e-07	0.00045683	0.0463682	0.0176175		0.205889	-0.287574	21.24	0.0470811	0.0643264		9.04263e-07	0.000635188	0.064644	0.0305062		0.0762905	0.0124683	21.4023	0.0467239	0.0467365		3.84195e-07	0.00046229	0.0469676	0.0178087
						-0.205432	0.288015	21.2396	0.047082	0.0649616		9.04119e-07	0.000635088	0.0652792	0.0305061		0	0.0767474	21.4025	0.0467235	0.0465966		3.7558e-07	0.00045683	0.046825	0.0176175		0.205432	-0.288015	21.2396	0.047082	0.0649616		9.04119e-07	0.000635088	0.0652792	0.0305061		0.0767474	0.0125391	21.4022	0.0467243	0.0471988		3.84186e-07	0.000462278	0.0474299	0.0178087
						-0.204975	0.288457	21.2391	0.0470829	0.0655967		9.03979e-07	0.00063499	0.0659142	0.0305061		0	0.0772042	21.4024	0.0467238	0.0470534		3.7558e-07	0.00045683	0.0472819	0.0176175		0.204975	-0.288457	21.2391	0.0470829	0.0655967		9.03979e-07	0.00063499	0.0659142	0.0305061		0.0772042	0.0126099	21.402	0.0467247	0.0476611		3.84176e-07	0.000462266	0.0478922	0.0178087
						-0.204519	0.288898	21.2387	0.0470838	0.0662317		9.03842e-07	0.000634895	0.0665492	0.030506		0	0.077661	21.4022	0.0467242	0.0475103		3.7558e-07	0.00045683	0.0477387	0.0176175		0.204519	-0.288898	21.2387	0.0470838	0.0662317		9.03842e-07	0.000634895	0.0665492	0.030506		0.077661	0.0126806	21.4018	0.046725	0.0481233		3.83831e-07	0.000462254	0.0483545	0.0177932
						-0.204062	0.289339	21.2383	0.0470847	0.0668666		1.00222e-06	0.000634802	0.067184	0.0338315		0	0.0781179	21.402	0.0467246	0.0479671		3.7558e-07	0.00045683	0.0481955	0.0176175		0.204062	-0.289339	21.2383	0.0470847	0.0668666		1.00222e-06	0.000634802	0.067184	0.0338315		0.0781179	0.0127512	21.4016	0.0467254	0.0485856		3.83732e-07	0.000462242	0.0488167	0.0177891
						-0.203605	0.289779	21.2379	0.0470857	0.0675014		1.0219e-06	0.000634712	0.0678188	0.0345005		0	0.0785747	21.4018	0.046725	0.0484239		3.7558e-07	0.00045683	0.0486524	0.0176175		0.203605	-0.289779	21.2379	0.0470857	0.0675014		1.0219e-06	0.000634712	0.0678188	0.0345005		0.0785747	0.0128217	21.4014	0.0467258	0.0490478		3.83722e-07	0.00046223	0.0492789	0.0177891
						-0.203148	0.29022	21.2374	0.0470867	0.0681361		1.02175e-06	0.000634623	0.0684534	0.0345005		0	0.0790315	21.4017	0.0467253	0.0488808		3.7558e-07	0.00045683	0.0491092	0.0176175		0.203148	-0.29022	21.2374	0.0470867	0.0681361		1.02175e-06	0.000634623	0.0684534	0.0345005		0.0790315	0.0128922	21.4013	0.0467262	0.0495101		3.83713e-07	0.000462219	0.0497412	0.0177891
						-0.202691	0.290661	21.237	0.0470877	0.0687707		1.02161e-06	0.000634537	0.069088	0.0345004		0	0.0794884	21.4015	0.0467257	0.0493376		3.7558e-07	0.00045683	0.049566	0.0176175		0.202691	-0.290661	21.237	0.0470877	0.0687707		1.02161e-06	0.000634537	0.069088	0.0345004		0.0794884	0.0129626	21.4011	0.0467266	0.0499723		3.83703e-07	0.000462207	0.0502034	0.0177891
						-0.202234	0.291101	21.2365	0.0470887	0.0694053		1.01155e-06	0.000634452	0.0697225	0.0341652		0	0.0799452	21.4013	0.0467261	0.0497944		3.7558e-07	0.00045683	0.0500228	0.0176175		0.202234	-0.291101	21.2365	0.0470887	0.0694053		1.01155e-06	0.000634452	0.0697225	0.0341652		0.0799452	0.0130328	21.4009	0.046727	0.0504345		3.83693e-07	0.000462195	0.0506656	0.0177891
						-0.201778	0.291541	21.236	0.0470898	0.0700397		9.9743e-07	0.000634347	0.0703569	0.0336939		0	0.080402	21.4011	0.0467265	0.0502513		4.00872e-07	0.00045683	0.0504797	0.0188038		0.201778	-0.291541	21.236	0.0470898	0.0700397		9.9743e-07	0.000634347	0.0703569	0.0336939		0.080402	0.0131031	21.4007	0.0467273	0.0508967		4.09311e-07	0.000462183	0.0511278	0.0189773
						-0.201321	0.291981	21.2356	0.0470908	0.0706741		1.07567e-06	0.000634149	0.0709911	0.0363481		0	0.0808588	21.401	0.0467269	0.0507081		4.00872e-07	0.00045683	0.0509365	0.0188038		0.201321	-0.291981	21.2356	0.0470908	0.0706741		1.07567e-06	0.000634149	0.0709911	0.0363481		0.0808588	0.0131732	21.4006	0.0467278	0.0513589		4.093e-07	0.00046217	0.0515899	0.0189773
						-0.200864	0.292421	21.2351	0.0470918	0.0713082		1.04249e-06	0.000633982	0.0716252	0.0352362		0	0.0813157	21.4008	0.0467273	0.0511649		4.00872e-07	0.00045683	0.0513933	0.0188038		0.200864	-0.292421	21.2351	0.0470918	0.0713082		1.04249e-06	0.000633982	0.0716252	0.0352362		0.0813157	0.0132433	21.4004	0.0467282	0.051821		4.09289e-07	0.000462157	0.0520521	0.0189774
						-0.200407	0.292861	21.2346	0.0470929	0.0719422		1.04232e-06	0.000633881	0.0722591	0.0352362		0	0.0817725	21.4006	0.0467277	0.0516217		4.00872e-07	0.00045683	0.0518502	0.0188038		0.200407	-0.292861	21.2346	0.0470929	0.0719422		1.04232e-06	0.000633881	0.0722591	0.0352362		0.0817725	0.0133132	21.4002	0.0467286	0.0522832		4.09158e-07	0.000462144	0.0525143	0.0189718
						-0.19995	0.2933	21.2342	0.0470939	0.0725761		1.04216e-06	0.000633782	0.072893	0.0352362		0	0.0822293	21.4004	0.0467281	0.0520786		4.00872e-07	0.00045683	0.052307	0.0188038		0.19995	-0.2933	21.2342	0.0470939	0.0725761		1.04216e-06	0.000633782	0.072893	0.0352362		0.0822293	0.0133831	21.4	0.046729	0.0527453		4.08798e-07	0.000462131	0.0529764	0.0189557
						-0.199493	0.293739	21.2337	0.047095	0.0732099		1.042e-06	0.000633686	0.0735267	0.0352361		0	0.0826862	21.4002	0.0467285	0.0525354		4.00872e-07	0.00045683	0.0527638	0.0188038		0.199493	-0.293739	21.2337	0.047095	0.0732099		1.042e-06	0.000633686	0.0735267	0.0352361		0.0826862	0.0134529	21.3998	0.0467294	0.0532075		4.08788e-07	0.000462118	0.0534385	0.0189557
						-0.199037	0.294179	21.2332	0.047096	0.0738436		1.12027e-06	0.000633591	0.0741603	0.0378885		0	0.083143	21.4	0.0467289	0.0529922		4.00872e-07	0.00045683	0.0532206	0.0188038		0.199037	-0.294179	21.2332	0.047096	0.0738436		1.12027e-06	0.000633591	0.0741603	0.0378885		0.083143	0.0135226	21.3996	0.0467298	0.0536696		4.08777e-07	0.000462105	0.0539006	0.0189558
						-0.19858	0.294618	21.2327	0.0470971	0.0744771		1.16703e-06	0.000633499	0.0747939	0.039476		0	0.0835998	21.3999	0.0467293	0.0534491		4.00872e-07	0.00045683	0.0536775	0.0188038		0.19858	-0.294618	21.2327	0.0470971	0.0744771		1.16703e-06	0.000633499	0.0747939	0.039476		0.0835998	0.0135923	21.3994	0.0467302	0.0541317		4.08767e-07	0.000462092	0.0543627	0.0189558
						-0.198123	0.295057	21.2322	0.0470983	0.0751106		1.16687e-06	0.000633408	0.0754273	0.039476		0	0.0840566	21.3997	0.0467297	0.0539059		4.00872e-07	0.00045683	0.0541343	0.0188038		0.198123	-0.295057	21.2322	0.0470983	0.0751106		1.16687e-06	0.000633408	0.0754273	0.039476		0.0840566	0.0136618	21.3992	0.0467306	0.0545938		4.08756e-07	0.000462079	0.0548248	0.0189558
						-0.197666	0.295495	21.2317	0.0470995	0.0757441		1.1667e-06	0.00063332	0.0760607	0.0394759		0	0.0845135	21.3995	0.0467301	0.0543627		4.00872e-07	0.00045683	0.0545911	0.0188038		0.197666	-0.295495	21.2317	0.0470995	0.0757441		1.1667e-06	0.00063332	0.0760607	0.0394759		0.0845135	0.0137313	21.3991	0.046731	0.0550559		4.08745e-07	0.000462067	0.0552869	0.0189559
						-0.197209	0.295934	21.2311	0.0471006	0.0763774		1.16654e-06	0.000633233	0.076694	0.0394759		0	0.0849703	21.3993	0.0467305	0.0548196		4.00872e-07	0.00045683	0.055048	0.0188038		0.197209	-0.295934	21.2311	0.0471006	0.0763774		1.16654e-06	0.000633233	0.076694	0.0394759		0.0849703	0.0138006	21.3989	0.0467314	0.0555179		4.08735e-07	0.000462054	0.0557489	0.0189559
						-0.196753	0.296372	21.2306	0.0471018	0.0770106		1.1274e-06	0.000633149	0.0773272	0.0381563		0	0.0854271	21.3991	0.0467309	0.0552764		4.26434e-07	0.00045683	0.0555048	0.0200029		0.196753	-0.296372	21.2306	0.0471018	0.0770106		1.1274e-06	0.000633149	0.0773272	0.0381563		0.0854271	0.0138699	21.3987	0.0467318	0.05598		4.34659e-07	0.000462041	0.056211	0.0201587
						-0.196296	0.296811	21.2301	0.0471029	0.0776438		1.22547e-06	0.000632976	0.0779602	0.0414867		0	0.085884	21.3989	0.0467313	0.0557332		4.26434e-07	0.00045683	0.0559616	0.0200029		0.196296	-0.296811	21.2301	0.0471029	0.0776438		1.22547e-06	0.000632976	0.0779602	0.0414867		0.085884	0.0139391	21.3985	0.0467323	0.056442		4.34647e-07	0.000462027	0.056673	0.0201588
						-0.195839	0.297249	21.2296	0.0471041	0.0782767		1.19114e-06	0.000632805	0.0785931	0.0403357		0	0.0863408	21.3987	0.0467317	0.05619		4.26434e-07	0.00045683	0.0564185	0.0200029		0.195839	-0.297249	21.2296	0.0471041	0.0782767		1.19114e-06	0.000632805	0.0785931	0.0403357		0.0863408	0.0140082	21.3983	0.0467327	0.056904		4.34269e-07	0.000462013	0.057135	0.0201419
						-0.195382	0.297687	21.229	0.0471053	0.0789095		1.19095e-06	0.000632702	0.0792259	0.0403357		0	0.0867976	21.3985	0.0467322	0.0566469		4.26434e-07	0.00045683	0.0568753	0.0200029		0.195382	-0.297687	21.229	0.0471053	0.0789095		1.19095e-06	0.000632702	0.0792259	0.0403357		0.0867976	0.0140772	21.3981	0.0467331	0.0573661		4.34106e-07	0.000461999	0.0575971	0.0201349
						-0.194925	0.298125	21.2285	0.0471065	0.0795422		1.19076e-06	0.000632602	0.0798585	0.0403357		0	0.0872545	21.3983	0.0467326	0.0571037		4.26434e-07	0.00045683	0.0573321	0.0200029		0.194925	-0.298125	21.2285	0.0471065	0.0795422		1.19076e-06	0.000632602	0.0798585	0.0403357		0.0872545	0.0141461	21.3979	0.0467336	0.0578281		4.34094e-07	0.000461985	0.058059	0.020135
						-0.194468	0.298562	21.2279	0.0471077	0.0801748		1.19057e-06	0.000632503	0.0804911	0.0403356		0	0.0877113	21.3982	0.046733	0.0575605		4.26434e-07	0.00045683	0.0577889	0.0200029		0.194468	-0.298562	21.2279	0.0471077	0.0801748		1.19057e-06	0.000632503	0.0804911	0.0403356		0.0877113	0.014215	21.3977	0.046734	0.05829		4.34083e-07	0.000461971	0.058521	0.0201351
						-0.194012	0.299	21.2274	0.0471089	0.0808073		1.24342e-06	0.000632406	0.0811235	0.0421323		0	0.0881681	21.398	0.0467334	0.0580174		4.26434e-07	0.00045683	0.0582458	0.0200029		0.194012	-0.299	21.2274	0.0471089	0.0808073		1.24342e-06	0.000632406	0.0811235	0.0421323		0.0881681	0.0142837	21.3975	0.0467345	0.058752		4.34071e-07	0.000461957	0.058983	0.0201351
						-0.193555	0.299437	21.2268	0.0471102	0.0814397		1.32389e-06	0.000632312	0.0817559	0.0448657		0	0.0886249	21.3978	0.0467339	0.0584742		4.26434e-07	0.00045683	0.0587026	0.0200029		0.193555	-0.299437	21.2268	0.0471102	0.0814397		1.32389e-06	0.000632312	0.0817559	0.0448657		0.0886249	0.0143523	21.3973	0.0467349	0.059214		4.3406e-07	0.000461943	0.0594449	0.0201352
						-0.193098	0.299874	21.2263	0.0471115	0.0820721		1.32369e-06	0.000632219	0.0823882	0.0448657		0	0.0890818	21.3976	0.0467343	0.058931		4.26434e-07	0.00045683	0.0591594	0.0200029		0.193098	-0.299874	21.2263	0.0471115	0.0820721		1.32369e-06	0.000632219	0.0823882	0.0448657		0.0890818	0.0144209	21.3971	0.0467353	0.0596759		4.34048e-07	0.000461929	0.0599069	0.0201353
						-0.192641	0.300311	21.2257	0.0471128	0.0827043		1.3235e-06	0.000632129	0.0830203	0.0448656		0	0.0895386	21.3974	0.0467347	0.0593878		4.26434e-07	0.00045683	0.0596163	0.0200029		0.192641	-0.300311	21.2257	0.0471128	0.0827043		1.3235e-06	0.000632129	0.0830203	0.0448656		0.0895386	0.0144893	21.3969	0.0467358	0.0601378		4.34037e-07	0.000461915	0.0603688	0.0201354
						-0.192184	0.300748	21.2251	0.0471141	0.0833364		1.32331e-06	0.00063204	0.0836524	0.0448656		0	0.0899954	21.3972	0.0467351	0.0598447		4.26434e-07	0.00045683	0.0600731	0.0200029		0.192184	-0.300748	21.2251	0.0471141	0.0833364		1.32331e-06	0.00063204	0.0836524	0.0448656		0.0899954	0.0145577	21.3967	0.0467362	0.0605998		4.34025e-07	0.000461901	0.0608307	0.0201354
						-0.191727	0.301185	21.2245	0.0471154	0.0839684		1.30816e-06	0.000631953	0.0842844	0.0443581		0	0.0904523	21.397	0.0467356	0.0603015		4.52304e-07	0.00045683	0.0605299	0.0212164		0.191727	-0.301185	21.2245	0.0471154	0.0839684		1.30816e-06	0.000631953	0.0842844	0.0443581		0.0904523	0.0146259	21.3965	0.0467366	0.0610617		4.60215e-07	0.000461888	0.0612926	0.0213511
						-0.191271	0.301622	21.2239	0.0471168	0.0846004		1.35667e-06	0.000631835	0.0849163	0.0460116		0	0.0909091	21.3968	0.046736	0.0607583		4.52304e-07	0.00045683	0.0609868	0.0212164		0.191271	-0.301622	21.2239	0.0471168	0.0846004		1.35667e-06	0.000631835	0.0849163	0.0460116		0.0909091	0.0146941	21.3963	0.0467371	0.0615235		4.59714e-07	0.000461872	0.0617545	0.0213285
						-0.190814	0.302058	21.2233	0.0471181	0.0852322		1.35217e-06	0.000631659	0.0855481	0.0458715		0	0.0913659	21.3966	0.0467365	0.0612152		4.52304e-07	0.00045683	0.0614436	0.0212164		0.190814	-0.302058	21.2233	0.0471181	0.0852322		1.35217e-06	0.000631659	0.0855481	0.0458715		0.0913659	0.0147622	21.3961	0.0467375	0.0619854		4.59702e-07	0.000461857	0.0622163	0.0213287
						-0.190357	0.302494	21.2227	0.0471195	0.0858639		1.35194e-06	0.000631554	0.0861797	0.0458715		0	0.0918228	21.3964	0.0467369	0.061672		4.52304e-07	0.00045683	0.0619004	0.0212164		0.190357	-0.302494	21.2227	0.0471195	0.0858639		1.35194e-06	0.000631554	0.0861797	0.0458715		0.0918228	0.0148301	21.3959	0.046738	0.0624473		4.59689e-07	0.000461842	0.0626782	0.0213288
						-0.1899	0.30293	21.222	0.0471208	0.0864954		1.35172e-06	0.000631451	0.0868112	0.0458715		0	0.0922796	21.3962	0.0467374	0.0621288		4.52304e-07	0.00045683	0.0623572	0.0212164		0.1899	-0.30293	21.222	0.0471208	0.0864954		1.35172e-06	0.000631451	0.0868112	0.0458715		0.0922796	0.014898	21.3957	0.0467385	0.0629091		4.59677e-07	0.000461827	0.06314	0.0213289
						-0.189443	0.303366	21.2214	0.0471222	0.0871269		1.3515e-06	0.000631349	0.0874426	0.0458715		0	0.0927364	21.3959	0.0467378	0.0625857		4.52304e-07	0.00045683	0.0628141	0.0212164		0.189443	-0.303366	21.2214	0.0471222	0.0871269		1.3515e-06	0.000631349	0.0874426	0.0458715		0.0927364	0.0149657	21.3954	0.0467389	0.0633709		4.59664e-07	0.000461812	0.0636018	0.021329
						-0.188986	0.303802	21.2208	0.0471235	0.0877582		1.37224e-06	0.00063125	0.0880739	0.0465826		0	0.0931932	21.3957	0.0467383	0.0630425		4.52304e-07	0.00045683	0.0632709	0.0212164		0.188986	-0.303802	21.2208	0.0471235	0.0877582		1.37224e-06	0.00063125	0.0880739	0.0465826		0.0931932	0.0150334	21.3952	0.0467394	0.0638328		4.60938e-07	0.000461797	0.0640637	0.0213888
						-0.18853	0.304238	21.2202	0.0471249	0.0883895		1.49459e-06	0.000631153	0.0887051	0.0507438		0	0.0936501	21.3955	0.0467387	0.0634993		4.52304e-07	0.00045683	0.0637277	0.0212164		0.18853	-0.304238	21.2202	0.0471249	0.0883895		1.49459e-06	0.000631153	0.0887051	0.0507438		0.0936501	0.015101	21.395	0.0467398	0.0642945		4.63031e-07	0.000461782	0.0645254	0.0214866
						-0.188073	0.304673	21.2195	0.0471264	0.0890207		1.49436e-06	0.000631057	0.0893362	0.0507437		0	0.0941069	21.3953	0.0467392	0.0639561		4.52304e-07	0.00045683	0.0641846	0.0212164		0.188073	-0.304673	21.2195	0.0471264	0.0890207		1.49436e-06	0.000631057	0.0893362	0.0507437		0.0941069	0.0151684	21.3948	0.0467403	0.0647563		4.63014e-07	0.000461767	0.0649872	0.0214865
						-0.187616	0.305109	21.2189	0.0471279	0.0896517		1.49414e-06	0.000630964	0.0899672	0.0507437		0	0.0945637	21.3951	0.0467396	0.064413		4.52304e-07	0.00045683	0.0646414	0.0212164		0.187616	-0.305109	21.2189	0.0471279	0.0896517		1.49414e-06	0.000630964	0.0899672	0.0507437		0.0945637	0.0152358	21.3946	0.0467408	0.0652181		4.62996e-07	0.000461753	0.065449	0.0214864
						-0.187159	0.305544	21.2182	0.0471294	0.0902827		1.49392e-06	0.000630872	0.0905981	0.0507437		0	0.0950206	21.3949	0.0467401	0.0648698		4.52304e-07	0.00045683	0.0650982	0.0212164		0.187159	-0.305544	21.2182	0.0471294	0.0902827		1.49392e-06	0.000630872	0.0905981	0.0507437		0.0950206	0.015303	21.3944	0.0467412	0.0656799		4.62528e-07	0.000461738	0.0659107	0.0214653
						-0.186702	0.305979	21.2175	0.0471309	0.0909135		1.49371e-06	0.000630782	0.0912289	0.0507437		0	0.0954774	21.3947	0.0467405	0.0653266		4.78527e-07	0.00045683	0.065555	0.0224465		0.186702	-0.305979	21.2175	0.0471309	0.0909135		1.49371e-06	0.000630782	0.0912289	0.0507437		0.0954774	0.0153702	21.3942	0.0467417	0.0661416		4.88991e-07	0.000461723	0.0663725	0.0226942
						-0.186245	0.306414	21.2168	0.0471324	0.0915443		1.50915e-06	0.000630694	0.0918597	0.0512753		0	0.0959342	21.3945	0.046741	0.0657835		4.78527e-07	0.00045683	0.0660119	0.0224465		0.186245	-0.306414	21.2168	0.0471324	0.0915443		1.50915e-06	0.000630694	0.0918597	0.0512753		0.0959342	0.0154372	21.394	0.0467422	0.0666033		4.88972e-07	0.000461707	0.0668342	0.0226941
						-0.185789	0.306849	21.2162	0.0471339	0.092175		1.52781e-06	0.000630547	0.0924903	0.0519215		0	0.096391	21.3943	0.0467415	0.0662403		4.78527e-07	0.00045683	0.0664687	0.0224465		0.185789	-0.306849	21.2162	0.0471339	0.092175		1.52781e-06	0.000630547	0.0924903	0.0519215		0.096391	0.0155041	21.3937	0.0467427	0.067065		4.88953e-07	0.000461691	0.0672959	0.022694
						-0.185332	0.307283	21.2155	0.0471354	0.0928056		1.52755e-06	0.000630438	0.0931208	0.0519215		0	0.0968479	21.394	0.046742	0.0666971		4.78527e-07	0.00045683	0.0669255	0.0224465		0.185332	-0.307283	21.2155	0.0471354	0.0928056		1.52755e-06	0.000630438	0.0931208	0.0519215		0.0968479	0.015571	21.3935	0.0467432	0.0675267		4.88934e-07	0.000461675	0.0677575	0.0226939
						-0.184875	0.307718	21.2148	0.0471369	0.093436		1.52729e-06	0.000630331	0.0937512	0.0519215		0	0.0973047	21.3938	0.0467425	0.067154		4.78527e-07	0.00045683	0.0673824	0.0224465		0.184875	-0.307718	21.2148	0.0471369	0.093436		1.52729e-06	0.000630331	0.0937512	0.0519215		0.0973047	0.0156377	21.3933	0.0467436	0.0679884		4.88915e-07	0.000461659	0.0682192	0.0226938
						-0.184418	0.308152	21.2141	0.0471385	0.0940663		1.52704e-06	0.000630227	0.0943814	0.0519216		0	0.0977615	21.3936	0.0467429	0.0676108		4.78527e-07	0.00045683	0.0678392	0.0224465		0.184418	-0.308152	21.2141	0.0471385	0.0940663		1.52704e-06	0.000630227	0.0943814	0.0519216		0.0977615	0.0157043	21.3931	0.0467441	0.06845		4.88896e-07	0.000461643	0.0686809	0.0226937
						-0.183961	0.308586	21.2134	0.04714	0.0946966		1.52679e-06	0.000630124	0.0950116	0.0519216		0	0.0982184	21.3934	0.0467434	0.0680676		4.78527e-07	0.00045683	0.068296	0.0224465		0.183961	-0.308586	21.2134	0.04714	0.0946966		1.52679e-06	0.000630124	0.0950116	0.0519216		0.0982184	0.0157707	21.3928	0.0467446	0.0689117		4.88877e-07	0.000461627	0.0691425	0.0226936
						-0.183504	0.30902	21.2127	0.0471415	0.0953267		1.66208e-06	0.000630024	0.0956417	0.0565316		0	0.0986752	21.3932	0.0467439	0.0685244		4.78527e-07	0.00045683	0.0687529	0.0224465		0.183504	-0.30902	21.2127	0.0471415	0.0953267		1.66208e-06	0.000630024	0.0956417	0.0565316		0.0986752	0.0158371	21.3926	0.0467451	0.0693733		4.88858e-07	0.000461611	0.0696041	0.0226935
						-0.183048	0.309454	21.212	0.0471432	0.0959567		1.68138e-06	0.000629925	0.0962717	0.057197		0	0.099132	21.393	0.0467444	0.0689813		4.78527e-07	0.00045683	0.0692097	0.0224465		0.183048	-0.309454	21.212	0.0471432	0.0959567		1.68138e-06	0.000629925	0.0962717	0.057197		0.099132	0.0159034	21.3924	0.0467456	0.0698349		4.8884e-07	0.000461595	0.0700657	0.0226934
						-0.182591	0.309888	21.2112	0.0471448	0.0965866		1.68112e-06	0.000629828	0.0969015	0.0571969		0	0.0995889	21.3927	0.0467448	0.0694381		4.78527e-07	0.00045683	0.0696665	0.0224465		0.182591	-0.309888	21.2112	0.0471448	0.0965866		1.68112e-06	0.000629828	0.0969015	0.0571969		0.0995889	0.0159696	21.3922	0.0467461	0.0702965		4.87974e-07	0.000461579	0.0705273	0.022654
						-0.182134	0.310321	21.2105	0.0471465	0.0972165		1.68087e-06	0.000629733	0.0975313	0.0571969		0	0.100046	21.3925	0.0467453	0.0698949		4.78527e-07	0.00045683	0.0701233	0.0224465		0.182134	-0.310321	21.2105	0.0471465	0.0972165		1.68087e-06	0.000629733	0.0975313	0.0571969		0.100046	0.0160356	21.3919	0.0467466	0.0707581		4.87922e-07	0.000461564	0.0709889	0.0226524
						-0.181677	0.310755	21.2097	0.0471482	0.0978462		1.68062e-06	0.000629639	0.098161	0.0571969		0	0.100503	21.3923	0.0467458	0.0703518		5.0515e-07	0.00045683	0.0705802	0.0236953		0.181677	-0.310755	21.2097	0.0471482	0.0978462		1.68062e-06	0.000629639	0.098161	0.0571969		0.100503	0.0161015	21.3917	0.0467471	0.0712197		5.15198e-07	0.000461548	0.0714504	0.0239195
						-0.18122	0.311188	21.209	0.0471499	0.0984758		1.69065e-06	0.000629547	0.0987906	0.0575469		0	0.100959	21.3921	0.0467463	0.0708086		5.0515e-07	0.00045683	0.071037	0.0236953		0.18122	-0.311188	21.209	0.0471499	0.0984758		1.69065e-06	0.000629547	0.0987906	0.0575469		0.100959	0.0161674	21.3915	0.0467476	0.0716812		5.15177e-07	0.000461531	0.071912	0.0239195
						-0.180763	0.311621	21.2082	0.0471516	0.0991054		1.72071e-06	0.000629471	0.0994201	0.058577		0	0.101416	21.3918	0.0467468	0.0712654		5.0515e-07	0.00045683	0.0714938	0.0236953		0.180763	-0.311621	21.2082	0.0471516	0.0991054		1.72071e-06	0.000629471	0.0994201	0.058577		0.101416	0.0162331	21.3912	0.0467481	0.0721427		5.15157e-07	0.000461513	0.0723735	0.0239194
						-0.180307	0.312054	21.2074	0.0471533	0.0997349		1.7204e-06	0.000629358	0.10005	0.058577		0	0.101873	21.3916	0.0467473	0.0717222		5.0515e-07	0.00045683	0.0719507	0.0236953		0.180307	-0.312054	21.2074	0.0471533	0.0997349		1.7204e-06	0.000629358	0.10005	0.058577		0.101873	0.0162987	21.391	0.0467486	0.0726043		5.15136e-07	0.000461496	0.072835	0.0239193
						-0.17985	0.312487	21.2066	0.047155	0.100364		1.7201e-06	0.000629247	0.100679	0.058577		0	0.10233	21.3914	0.0467478	0.0721791		5.0515e-07	0.00045683	0.0724075	0.0236953		0.17985	-0.312487	21.2066	0.047155	0.100364		1.7201e-06	0.000629247	0.100679	0.058577		0.10233	0.0163641	21.3908	0.0467491	0.0730658		5.15116e-07	0.000461479	0.0732965	0.0239193
						-0.179393	0.31292	21.2059	0.0471567	0.100993		1.7198e-06	0.000629138	0.101308	0.0585771		0	0.102787	21.3911	0.0467483	0.0726359		5.0515e-07	0.00045683	0.0728643	0.0236953		0.179393	-0.31292	21.2059	0.0471567	0.100993		1.7198e-06	0.000629138	0.101308	0.0585771		0.102787	0.0164295	21.3905	0.0467496	0.0735272		5.15096e-07	0.000461462	0.073758	0.0239192
						-0.178936	0.313353	21.2051	0.0471585	0.101623		1.71951e-06	0.000629032	0.101937	0.0585771		0	0.103243	21.3909	0.0467488	0.0730927		5.0515e-07	0.00045683	0.0733212	0.0236953		0.178936	-0.313353	21.2051	0.0471585	0.101623		1.71951e-06	0.000629032	0.101937	0.0585771		0.103243	0.0164947	21.3903	0.0467502	0.0739887		5.15075e-07	0.000461445	0.0742194	0.0239192
						-0.178479	0.313785	21.2043	0.0471602	0.102252		1.81726e-06	0.000628927	0.102566	0.0619171		0	0.1037	21.3907	0.0467493	0.0735496		5.0515e-07	0.00045683	0.073778	0.0236953		0.178479	-0.313785	21.2043	0.0471602	0.102252		1.81726e-06	0.000628927	0.102566	0.0619171		0.1037	0.0165598	21.3901	0.0467507	0.0744501		5.14724e-07	0.000461428	0.0746809	0.0239037
						-0.178022	0.314217	21.2035	0.047162	0.102881		1.8877e-06	0.000628824	0.103195	0.0643278		0	0.104157	21.3904	0.0467498	0.0740064		5.0515e-07	0.00045683	0.0742348	0.0236953		0.178022	-0.314217	21.2035	0.047162	0.102881		1.8877e-06	0.000628824	0.103195	0.0643278		0.104157	0.0166248	21.3898	0.0467512	0.0749116		5.1407e-07	0.000461412	0.0751423	0.0238742
						-0.177566	0.314649	21.2027	0.0471639	0.103509		1.88739e-06	0.000628723	0.103824	0.0643278		0	0.104614	21.3902	0.0467503	0.0744632		5.0515e-07	0.00045683	0.0746916	0.0236953		0.177566	-0.314649	21.2027	0.0471639	0.103509		1.88739e-06	0.000628723	0.103824	0.0643278		0.104614	0.0166896	21.3896	0.0467517	0.075373		5.1405e-07	0.000461395	0.0756037	0.0238742
						-0.177109	0.315081	21.2018	0.0471658	0.104138		1.8871e-06	0.000628624	0.104452	0.0643278		0	0.105071	21.39	0.0467509	0.0749201		5.0515e-07	0.00045683	0.0751485	0.0236953		0.177109	-0.315081	21.2018	0.0471658	0.104138		1.8871e-06	0.000628624	0.104452	0.0643278		0.105071	0.0167544	21.3894	0.0467522	0.0758344		5.1403e-07	0.000461378	0.0760651	0.0238741
						-0.176652	0.315513	21.201	0.0471677	0.104767		1.8868e-06	0.000628526	0.105081	0.0643278		0	0.105528	21.3898	0.0467514	0.0753769		5.32226e-07	0.00045683	0.0756053	0.0249653		0.176652	-0.315513	21.201	0.0471677	0.104767		1.8868e-06	0.000628526	0.105081	0.0643278		0.105528	0.016819	21.3891	0.0467527	0.0762958		5.41825e-07	0.000461361	0.0765264	0.0251659
						-0.176195	0.315945	21.2001	0.0471695	0.105395		1.86812e-06	0.00062843	0.105709	0.0637006		0	0.105984	21.3895	0.0467519	0.0758337		5.32226e-07	0.00045683	0.0760621	0.0249653		0.176195	-0.315945	21.2001	0.0471695	0.105395		1.86812e-06	0.00062843	0.105709	0.0637006		0.105984	0.0168835	21.3889	0.0467533	0.0767571		5.41803e-07	0.000461343	0.0769878	0.0251659
						-0.175738	0.316376	21.1993	0.0471714	0.106024		1.95415e-06	0.000628371	0.106338	0.0666405		0	0.106441	21.3893	0.0467524	0.0762905		5.32226e-07	0.00045683	0.076519	0.0249653		0.175738	-0.316376	21.1993	0.0471714	0.106024		1.95415e-06	0.000628371	0.106338	0.0666405		0.106441	0.0169479	21.3886	0.0467538	0.0772185		5.41781e-07	0.000461325	0.0774491	0.0251659
						-0.175282	0.316808	21.1984	0.0471734	0.106652		1.93363e-06	0.000628318	0.106966	0.0659462		0	0.106898	21.389	0.046753	0.0767474		5.32226e-07	0.00045683	0.0769758	0.0249653		0.175282	-0.316808	21.1984	0.0471734	0.106652		1.93363e-06	0.000628318	0.106966	0.0659462		0.106898	0.0170121	21.3884	0.0467544	0.0776798		5.41759e-07	0.000461307	0.0779104	0.0251659
						-0.174825	0.317239	21.1975	0.0471753	0.10728		1.93328e-06	0.000628202	0.107594	0.0659462		0	0.107355	21.3888	0.0467535	0.0772042		5.32226e-07	0.00045683	0.0774326	0.0249653		0.174825	-0.317239	21.1975	0.0471753	0.10728		1.93328e-06	0.000628202	0.107594	0.0659462		0.107355	0.0170762	21.3881	0.0467549	0.0781411		5.41738e-07	0.000461289	0.0783717	0.0251658
						-0.174368	0.31767	21.1967	0.0471772	0.107909		1.93293e-06	0.000628089	0.108223	0.0659463		0	0.107812	21.3885	0.046754	0.077661		5.32226e-07	0.00045683	0.0778894	0.0249653		0.174368	-0.31767	21.1967	0.0471772	0.107909		1.93293e-06	0.000628089	0.108223	0.0659463		0.107812	0.0171402	21.3879	0.0467554	0.0786024		5.41716e-07	0.000461271	0.078833	0.0251658
						-0.173911	0.318102	21.1958	0.0471792	0.108537		1.93259e-06	0.000627977	0.108851	0.0659463		0	0.108269	21.3883	0.0467546	0.0781179		5.32226e-07	0.00045683	0.0783463	0.0249653		0.173911	-0.318102	21.1958	0.0471792	0.108537		1.93259e-06	0.000627977	0.108851	0.0659463		0.108269	0.0172041	21.3876	0.046756	0.0790636		5.40953e-07	0.000461253	0.0792943	0.0251314
						-0.173454	0.318532	21.1949	0.0471811	0.109165		1.98166e-06	0.000627867	0.109479	0.0676328		0	0.108725	21.388	0.0467551	0.0785747		5.32226e-07	0.00045683	0.0788031	0.0249653		0.173454	-0.318532	21.1949	0.0471811	0.109165		1.98166e-06	0.000627867	0.109479	0.0676328		0.108725	0.0172678	21.3874	0.0467565	0.0795249		5.40617e-07	0.000461235	0.0797555	0.0251167
						-0.172997	0.318963	21.194	0.0471831	0.109793		2.11683e-06	0.000627759	0.110106	0.0722584		0	0.109182	21.3878	0.0467556	0.0790315		5.32226e-07	0.00045683	0.0792599	0.0249653		0.172997	-0.318963	21.194	0.0471831	0.109793		2.11683e-06	0.000627759	0.110106	0.0722584		0.109182	0.0173314	21.3871	0.0467571	0.0799861		5.40595e-07	0.000461217	0.0802167	0.0251167
						-0.172541	0.319394	21.1931	0.0471852	0.11042		2.11647e-06	0.000627653	0.110734	0.0722584		0	0.109639	21.3876	0.0467561	0.0794884		5.32226e-07	0.00045683	0.0797168	0.0249653		0.172541	-0.319394	21.1931	0.0471852	0.11042		2.11647e-06	0.000627653	0.110734	0.0722584		0.109639	0.0173949	21.3869	0.0467576	0.0804474		5.40574e-07	0.0004612	0.080678	0.0251166
						-0.172084	0.319824	21.1921	0.0471873	0.111048		2.11612e-06	0.000627549	0.111362	0.0722584		0	0.110096	21.3873	0.0467567	0.0799452		5.32226e-07	0.00045683	0.0801736	0.0249653		0.172084	-0.319824	21.1921	0.0471873	0.111048		2.11612e-06	0.000627549	0.111362	0.0722584		0.110096	0.0174582	21.3866	0.0467581	0.0809086		5.40553e-07	0.000461182	0.0811391	0.0251166
						-0.171627	0.320254	21.1912	0.0471894	0.111675		2.11578e-06	0.000627447	0.111989	0.0722584		0	0.110553	21.3871	0.0467572	0.080402		5.59813e-07	0.00045683	0.0806304	0.0262593		0.171627	-0.320254	21.1912	0.0471894	0.111675		2.11578e-06	0.000627447	0.111989	0.0722584		0.110553	0.0175214	21.3864	0.0467587	0.0813697		5.68931e-07	0.000461164	0.0816003	0.0264362
						-0.17117	0.320684	21.1902	0.0471916	0.112303		2.09587e-06	0.000627346	0.112617	0.0715901		0	0.11101	21.3868	0.0467578	0.0808588		5.59813e-07	0.00045683	0.0810873	0.0262593		0.17117	-0.320684	21.1902	0.0471916	0.112303		2.09587e-06	0.000627346	0.112617	0.0715901		0.11101	0.0175845	21.3861	0.0467593	0.0818309		5.68908e-07	0.000461145	0.0820615	0.0264362
						-0.170713	0.321114	21.1893	0.0471936	0.11293		2.16898e-06	0.000627284	0.113244	0.0740947		0	0.111466	21.3866	0.0467583	0.0813157		5.59813e-07	0.00045683	0.0815441	0.0262593		0.170713	-0.321114	21.1893	0.0471936	0.11293		2.16898e-06	0.000627284	0.113244	0.0740947		0.111466	0.0176474	21.3859	0.0467598	0.082292		5.68884e-07	0.000461126	0.0825226	0.0264362
						-0.170256	0.321544	21.1883	0.0471958	0.113558		2.18209e-06	0.000627303	0.113871	0.0745404		0	0.111923	21.3863	0.0467589	0.0817725		5.59813e-07	0.00045683	0.0820009	0.0262593		0.170256	-0.321544	21.1883	0.0471958	0.113558		2.18209e-06	0.000627303	0.113871	0.0745404		0.111923	0.0177102	21.3856	0.0467604	0.0827532		5.68861e-07	0.000461107	0.0829837	0.0264363
						-0.1698	0.321974	21.1873	0.047198	0.114185		2.17057e-06	0.000627202	0.114498	0.0741586		0	0.11238	21.386	0.0467595	0.0822293		5.59813e-07	0.00045683	0.0824577	0.0262593		0.1698	-0.321974	21.1873	0.047198	0.114185		2.17057e-06	0.000627202	0.114498	0.0741586		0.11238	0.0177729	21.3854	0.046761	0.0832143		5.68796e-07	0.000461088	0.0834448	0.0264343
						-0.169343	0.322404	21.1864	0.0472002	0.114812		2.17016e-06	0.000627082	0.115126	0.0741587		0	0.112837	21.3858	0.04676	0.0826862		5.59813e-07	0.00045683	0.0829146	0.0262593		0.169343	-0.322404	21.1864	0.0472002	0.114812		2.17016e-06	0.000627082	0.115126	0.0741587		0.112837	0.0178354	21.3851	0.0467615	0.0836754		5.6766e-07	0.000461069	0.0839059	0.0263826
						-0.168886	0.322834	21.1854	0.0472023	0.115439		2.16975e-06	0.000626965	0.115753	0.0741588		0	0.113294	21.3855	0.0467606	0.083143		5.59813e-07	0.00045683	0.0833714	0.0262593		0.168886	-0.322834	21.1854	0.0472023	0.115439		2.16975e-06	0.000626965	0.115753	0.0741588		0.113294	0.0178978	21.3848	0.0467621	0.0841364		5.67637e-07	0.00046105	0.084367	0.0263826
						-0.168429	0.323263	21.1844	0.0472045	0.116066		2.16936e-06	0.000626849	0.11638	0.0741589		0	0.113751	21.3853	0.0467611	0.0835998		5.59813e-07	0.00045683	0.0838282	0.0262593		0.168429	-0.323263	21.1844	0.0472045	0.116066		2.16936e-06	0.000626849	0.11638	0.0741589		0.113751	0.01796	21.3846	0.0467627	0.0845975		5.67615e-07	0.000461031	0.084828	0.0263827
						-0.167972	0.323692	21.1834	0.0472067	0.116693		2.35946e-06	0.000626736	0.117006	0.080672		0	0.114207	21.385	0.0467617	0.0840566		5.59813e-07	0.00045683	0.0842851	0.0262593		0.167972	-0.323692	21.1834	0.0472067	0.116693		2.35946e-06	0.000626736	0.117006	0.080672		0.114207	0.0180221	21.3843	0.0467632	0.0850585		5.67592e-07	0.000461013	0.085289	0.0263827
						-0.167515	0.324121	21.1824	0.047209	0.11732		2.37261e-06	0.000626624	0.117633	0.0811361		0	0.114664	21.3848	0.0467623	0.0845135		5.59813e-07	0.00045683	0.0847419	0.0262593		0.167515	-0.324121	21.1824	0.047209	0.11732		2.37261e-06	0.000626624	0.117633	0.0811361		0.114664	0.0180841	21.3841	0.0467638	0.0855195		5.67569e-07	0.000460994	0.08575	0.0263827
						-0.167059	0.32455	21.1813	0.0472114	0.117946		2.37219e-06	0.000626514	0.11826	0.0811361		0	0.115121	21.3845	0.0467628	0.0849703		5.59813e-07	0.00045683	0.0851987	0.0262593		0.167059	-0.32455	21.1813	0.0472114	0.117946		2.37219e-06	0.000626514	0.11826	0.0811361		0.115121	0.0181459	21.3838	0.0467644	0.0859805		5.67547e-07	0.000460975	0.086211	0.0263827
						-0.166602	0.324979	21.1803	0.0472138	0.118573		2.37178e-06	0.000626406	0.118886	0.0811362		0	0.115578	21.3843	0.0467634	0.0854271		5.87975e-07	0.00045683	0.0856556	0.0275803		0.166602	-0.324979	21.1803	0.0472138	0.118573		2.37178e-06	0.000626406	0.118886	0.0811362		0.115578	0.0182076	21.3835	0.0467649	0.0864415		5.96579e-07	0.000460957	0.086672	0.0277334
						-0.166145	0.325408	21.1792	0.0472162	0.119199		2.35043e-06	0.0006263	0.119512	0.0804191		0	0.116035	21.384	0.046764	0.085884		5.87975e-07	0.00045683	0.0861124	0.0275803		0.166145	-0.325408	21.1792	0.0472162	0.119199		2.35043e-06	0.0006263	0.119512	0.0804191		0.116035	0.0182692	21.3833	0.0467655	0.0869025		5.96554e-07	0.000460937	0.0871329	0.0277334
						-0.165688	0.325836	21.1781	0.0472185	0.119826		2.35898e-06	0.000626234	0.120139	0.0807204		0	0.116492	21.3837	0.0467645	0.0863408		5.87975e-07	0.00045683	0.0865692	0.0275803		0.165688	-0.325836	21.1781	0.0472185	0.119826		2.35898e-06	0.000626234	0.120139	0.0807204		0.116492	0.0183306	21.383	0.0467661	0.0873634		5.9653e-07	0.000460917	0.0875938	0.0277335
						-0.165231	0.326264	21.1771	0.0472209	0.120452		2.50729e-06	0.000626254	0.120765	0.0857925		0	0.116948	21.3835	0.0467651	0.0867976		5.87975e-07	0.00045683	0.087026	0.0275803		0.165231	-0.326264	21.1771	0.0472209	0.120452		2.50729e-06	0.000626254	0.120765	0.0857924		0.116948	0.0183918	21.3827	0.0467667	0.0878243		5.96067e-07	0.000460897	0.0880548	0.0277132
						-0.164774	0.326693	21.176	0.0472234	0.121078		2.43651e-06	0.000626254	0.121391	0.0833708		0	0.117405	21.3832	0.0467657	0.0872545		5.87975e-07	0.00045683	0.0874829	0.0275803		0.164774	-0.326693	21.176	0.0472234	0.121078		2.43651e-06	0.000626254	0.121391	0.0833708		0.117405	0.0184529	21.3825	0.0467673	0.0882852		5.9522e-07	0.000460877	0.0885156	0.027675
						-0.164318	0.327121	21.1749	0.0472258	0.121704		2.43603e-06	0.000626127	0.122017	0.0833709		0	0.117862	21.3829	0.0467663	0.0877113		5.87975e-07	0.00045683	0.0879397	0.0275803		0.164318	-0.327121	21.1749	0.0472258	0.121704		2.43603e-06	0.000626127	0.122017	0.0833709		0.117862	0.0185138	21.3822	0.0467679	0.0887461		5.95196e-07	0.000460857	0.0889765	0.0276751
						-0.163861	0.327549	21.1738	0.0472282	0.12233		2.43555e-06	0.000626003	0.122643	0.0833711		0	0.118319	21.3826	0.0467669	0.0881681		5.87975e-07	0.00045683	0.0883965	0.0275803		0.163861	-0.327549	21.1738	0.0472282	0.12233		2.43555e-06	0.000626003	0.122643	0.0833711		0.118319	0.0185746	21.3819	0.0467685	0.0892069		5.95172e-07	0.000460837	0.0894374	0.0276751
						-0.163404	0.327977	21.1727	0.0472307	0.122956		2.43507e-06	0.00062588	0.123269	0.0833712		0	0.118776	21.3824	0.0467675	0.0886249		5.87975e-07	0.00045683	0.0888534	0.0275803		0.163404	-0.327977	21.1727	0.0472307	0.122956		2.43507e-06	0.00062588	0.123269	0.0833712		0.118776	0.0186353	21.3816	0.0467691	0.0896678		5.95148e-07	0.000460818	0.0898982	0.0276752
						-0.162947	0.328405	21.1716	0.0472331	0.123582		2.56626e-06	0.00062576	0.123895	0.0878796		0	0.119233	21.3821	0.0467681	0.0890818		5.87975e-07	0.00045683	0.0893102	0.0275803		0.162947	-0.328405	21.1716	0.0472331	0.123582		2.56626e-06	0.00062576	0.123895	0.0878796		0.119233	0.0186958	21.3814	0.0467697	0.0901286		5.95124e-07	0.000460798	0.090359	0.0276753
						-0.16249	0.328833	21.1704	0.0472357	0.124208		2.66096e-06	0.000625642	0.124521	0.0911398		0	0.119689	21.3818	0.0467687	0.0895386		5.87975e-07	0.00045683	0.089767	0.0275803		0.16249	-0.328833	21.1704	0.0472357	0.124208		2.66096e-06	0.000625642	0.124521	0.0911398		0.119689	0.0187561	21.3811	0.0467703	0.0905894		5.951e-07	0.000460779	0.0908198	0.0276753
						-0.162033	0.32926	21.1692	0.0472383	0.124834		2.66047e-06	0.000625525	0.125146	0.0911399		0	0.120146	21.3816	0.0467693	0.0899954		5.87975e-07	0.00045683	0.0902238	0.0275803		0.162033	-0.32926	21.1692	0.0472383	0.124834		2.66047e-06	0.000625525	0.125146	0.0911399		0.120146	0.0188163	21.3808	0.0467709	0.0910502		5.95076e-07	0.000460759	0.0912805	0.0276754
						-0.161577	0.329687	21.1681	0.047241	0.125459		2.65999e-06	0.000625411	0.125772	0.09114		0	0.120603	21.3813	0.0467698	0.0904523		6.16783e-07	0.00045683	0.0906807	0.0289317		0.161577	-0.329687	21.1681	0.047241	0.125459		2.65999e-06	0.000625411	0.125772	0.09114		0.120603	0.0188764	21.3805	0.0467715	0.0915109		6.24839e-07	0.00046074	0.0917413	0.0290608
						-0.16112	0.330115	21.1669	0.0472437	0.126085		2.6369e-06	0.000625298	0.126397	0.0903652		0	0.12106	21.381	0.0467705	0.0909091		6.16783e-07	0.00045683	0.0911375	0.0289317		0.16112	-0.330115	21.1669	0.0472437	0.126085		2.6369e-06	0.000625298	0.126397	0.0903652		0.12106	0.0189363	21.3803	0.0467721	0.0919717		6.24813e-07	0.000460719	0.092202	0.0290609
						-0.160663	0.330542	21.1657	0.0472463	0.12671		2.58598e-06	0.000625228	0.127023	0.0886301		0	0.121517	21.3807	0.0467711	0.0913659		6.16783e-07	0.00045683	0.0915943	0.0289317		0.160663	-0.330542	21.1657	0.0472463	0.12671		2.58598e-06	0.000625228	0.127023	0.0886301		0.121517	0.018996	21.38	0.0467727	0.0924324		6.2392e-07	0.000460698	0.0926627	0.0290207
						-0.160206	0.330968	21.1645	0.0472489	0.127335		2.80144e-06	0.00062525	0.127648	0.0960113		0	0.121974	21.3805	0.0467717	0.0918228		6.16783e-07	0.00045683	0.0920512	0.0289317		0.160206	-0.330968	21.1645	0.0472489	0.127335		2.80144e-06	0.00062525	0.127648	0.0960113		0.121974	0.0190556	21.3797	0.0467734	0.0928931		6.23387e-07	0.000460677	0.0931234	0.0289972
						-0.159749	0.331395	21.1633	0.0472517	0.12796		2.79186e-06	0.000625271	0.128273	0.0956798		0	0.12243	21.3802	0.0467723	0.0922796		6.16783e-07	0.00045683	0.092508	0.0289317		0.159749	-0.331395	21.1633	0.0472517	0.12796		2.79186e-06	0.000625271	0.128273	0.0956798		0.12243	0.019115	21.3794	0.046774	0.0933538		6.23361e-07	0.000460657	0.0935841	0.0289973
						-0.159292	0.331822	21.162	0.0472545	0.128586		2.73609e-06	0.000625233	0.128898	0.0937743		0	0.122887	21.3799	0.0467729	0.0927364		6.16783e-07	0.00045683	0.0929648	0.0289317		0.159292	-0.331822	21.162	0.0472545	0.128586		2.73609e-06	0.000625233	0.128898	0.0937743		0.122887	0.0191743	21.3791	0.0467746	0.0938144		6.23336e-07	0.000460636	0.0940447	0.0289974
						-0.158836	0.332249	21.1608	0.0472572	0.129211		2.73552e-06	0.000625101	0.129523	0.0937745		0	0.123344	21.3796	0.0467735	0.0931932		6.16783e-07	0.00045683	0.0934217	0.0289317		0.158836	-0.332249	21.1608	0.0472572	0.129211		2.73552e-06	0.000625101	0.129523	0.0937745		0.123344	0.0192334	21.3788	0.0467752	0.0942751		6.23311e-07	0.000460616	0.0945054	0.0289975
						-0.158379	0.332676	21.1596	0.0472599	0.129836		2.73496e-06	0.00062497	0.130148	0.0937748		0	0.123801	21.3793	0.0467742	0.0936501		6.16783e-07	0.00045683	0.0938785	0.0289317		0.158379	-0.332676	21.1596	0.0472599	0.129836		2.73496e-06	0.00062497	0.130148	0.0937748		0.123801	0.0192923	21.3786	0.0467759	0.0947357		6.23286e-07	0.000460595	0.094966	0.0289976
						-0.157922	0.333102	21.1583	0.0472627	0.130461		2.78738e-06	0.000624842	0.130773	0.0955917		0	0.124258	21.379	0.0467748	0.0941069		6.16783e-07	0.00045683	0.0943353	0.0289317		0.157922	-0.333102	21.1583	0.0472627	0.130461		2.78738e-06	0.000624842	0.130773	0.0955917		0.124258	0.0193511	21.3783	0.0467765	0.0951963		6.2326e-07	0.000460575	0.0954266	0.0289978
						-0.157465	0.333529	21.1571	0.0472655	0.131086		2.98792e-06	0.000624716	0.131398	0.10249		0	0.124714	21.3788	0.0467754	0.0945637		6.16783e-07	0.00045683	0.0947921	0.0289317		0.157465	-0.333529	21.1571	0.0472655	0.131086		2.98792e-06	0.000624716	0.131398	0.10249		0.124714	0.0194097	21.378	0.0467771	0.0956568		6.23235e-07	0.000460555	0.0958871	0.0289979
						-0.157008	0.333955	21.1558	0.0472685	0.131711		2.98734e-06	0.000624593	0.132023	0.10249		0	0.125171	21.3785	0.046776	0.0950206		6.16783e-07	0.00045683	0.095249	0.0289317		0.157008	-0.333955	21.1558	0.0472685	0.131711		2.98734e-06	0.000624593	0.132023	0.10249		0.125171	0.0194682	21.3777	0.0467777	0.0961174		6.2321e-07	0.000460535	0.0963477	0.028998
						-0.156552	0.334381	21.1544	0.0472714	0.132335		2.98676e-06	0.000624471	0.132647	0.10249		0	0.125628	21.3782	0.0467766	0.0954774		6.46316e-07	0.00045683	0.0957058	0.030317		0.156552	-0.334381	21.1544	0.0472714	0.132335		2.98676e-06	0.000624471	0.132647	0.10249		0.125628	0.0195265	21.3774	0.0467783	0.0965779		6.53789e-07	0.000460515	0.0968082	0.0304221
						-0.156095	0.334806	21.1531	0.0472744	0.13296		2.9616e-06	0.000624351	0.133272	0.101647		0	0.126085	21.3779	0.0467773	0.0959342		6.46316e-07	0.00045683	0.0961626	0.030317		0.156095	-0.334806	21.1531	0.0472744	0.13296		2.9616e-06	0.000624351	0.133272	0.101647		0.126085	0.0195846	21.3771	0.046779	0.0970384		6.52436e-07	0.000460493	0.0972687	0.0303606
						-0.155638	0.335232	21.1518	0.0472774	0.133584		2.9062e-06	0.000624276	0.133896	0.099757		0	0.126542	21.3776	0.0467779	0.096391		6.46316e-07	0.00045683	0.0966195	0.030317		0.155638	-0.335232	21.1518	0.0472774	0.133584		2.9062e-06	0.000624276	0.133896	0.099757		0.126542	0.0196426	21.3768	0.0467797	0.0974989		6.52237e-07	0.000460471	0.0977292	0.0303528
						-0.155181	0.335658	21.1505	0.0472803	0.134208		3.04553e-06	0.000624299	0.13452	0.104536		0	0.126999	21.3773	0.0467786	0.0968479		6.46316e-07	0.00045683	0.0970763	0.030317		0.155181	-0.335658	21.1505	0.0472803	0.134208		3.04553e-06	0.000624299	0.13452	0.104536		0.126999	0.0197004	21.3765	0.0467803	0.0979594		6.52211e-07	0.00046045	0.0981896	0.030353
						-0.154724	0.336083	21.1491	0.0472833	0.134833		3.1768e-06	0.000624322	0.135145	0.109038		0	0.127455	21.377	0.0467792	0.0973047		6.46316e-07	0.00045683	0.0975331	0.030317		0.154724	-0.336083	21.1491	0.0472833	0.134833		3.1768e-06	0.000624322	0.135145	0.109038		0.127455	0.019758	21.3762	0.046781	0.0984199		6.52184e-07	0.000460428	0.0986501	0.0303531
						-0.154267	0.336509	21.1477	0.0472865	0.135457		3.11801e-06	0.000624345	0.135769	0.107016		0	0.127912	21.3767	0.0467799	0.0977615		6.46316e-07	0.00045683	0.0979899	0.030317		0.154267	-0.336509	21.1477	0.0472865	0.135457		3.11801e-06	0.000624345	0.135769	0.107016		0.127912	0.0198154	21.3759	0.0467816	0.0988803		6.52158e-07	0.000460407	0.0991105	0.0303533
						-0.153811	0.336934	21.1463	0.0472896	0.136081		3.07656e-06	0.000624272	0.136393	0.105606		0	0.128369	21.3764	0.0467805	0.0982184		6.46316e-07	0.00045683	0.0984468	0.030317		0.153811	-0.336934	21.1463	0.0472896	0.136081		3.07656e-06	0.000624272	0.136393	0.105606		0.128369	0.0198727	21.3756	0.0467823	0.0993407		6.52131e-07	0.000460386	0.0995709	0.0303535
						-0.153354	0.33736	21.1449	0.0472927	0.136705		3.07589e-06	0.000624133	0.137018	0.105606		0	0.128826	21.3761	0.0467811	0.0986752		6.46316e-07	0.00045683	0.0989036	0.030317		0.153354	-0.33736	21.1449	0.0472927	0.136705		3.07589e-06	0.000624133	0.137018	0.105606		0.128826	0.0199298	21.3753	0.0467829	0.0998011		6.52105e-07	0.000460365	0.100031	0.0303536
						-0.152897	0.337785	21.1435	0.0472958	0.13733		3.07522e-06	0.000623996	0.137642	0.105606		0	0.129283	21.3758	0.0467818	0.099132		6.46316e-07	0.00045683	0.0993604	0.030317		0.152897	-0.337785	21.1435	0.0472958	0.13733		3.07522e-06	0.000623996	0.137642	0.105606		0.129283	0.0199868	21.375	0.0467836	0.100261		6.52079e-07	0.000460344	0.100492	0.0303538
						-0.15244	0.33821	21.1422	0.0472989	0.137954		3.30949e-06	0.000623862	0.138266	0.113676		0	0.12974	21.3755	0.0467824	0.0995889		6.46316e-07	0.00045683	0.0998173	0.030317		0.15244	-0.33821	21.1422	0.0472989	0.137954		3.30949e-06	0.000623862	0.138266	0.113676		0.12974	0.0200435	21.3747	0.0467842	0.100722		6.52052e-07	0.000460323	0.100952	0.0303539
						-0.151983	0.338635	21.1407	0.0473022	0.138577		3.36076e-06	0.000623729	0.138889	0.115461		0	0.130196	21.3752	0.0467831	0.100046		6.46316e-07	0.00045683	0.100274	0.030317		0.151983	-0.338635	21.1407	0.0473022	0.138577		3.36076e-06	0.000623729	0.138889	0.115461		0.130196	0.0201002	21.3744	0.0467849	0.101182		6.54501e-07	0.000460302	0.101412	0.0304693
						-0.151526	0.339059	21.1392	0.0473055	0.139201		3.36006e-06	0.000623599	0.139513	0.115461		0	0.130653	21.375	0.0467837	0.100503		6.76659e-07	0.00045683	0.100731	0.0317403		0.151526	-0.339059	21.1392	0.0473055	0.139201		3.36006e-06	0.000623599	0.139513	0.115461		0.130653	0.0201566	21.3741	0.0467855	0.101642		6.84546e-07	0.000460281	0.101873	0.0318694
						-0.15107	0.339484	21.1377	0.0473089	0.139825		3.33242e-06	0.000623471	0.140137	0.114535		0	0.13111	21.3746	0.0467844	0.100959		6.76659e-07	0.00045683	0.101188	0.0317403		0.15107	-0.339484	21.1377	0.0473089	0.139825		3.33242e-06	0.000623471	0.140137	0.114535		0.13111	0.0202129	21.3738	0.0467862	0.102103		6.8451e-07	0.000460259	0.102333	0.0318693
						-0.150613	0.339908	21.1362	0.0473122	0.140448		3.27163e-06	0.000623392	0.14076	0.11246		0	0.131567	21.3743	0.0467851	0.101416		6.76659e-07	0.00045683	0.101645	0.0317403		0.150613	-0.339908	21.1362	0.0473122	0.140448		3.27163e-06	0.000623392	0.14076	0.11246		0.131567	0.0202689	21.3735	0.0467869	0.102563		6.84473e-07	0.000460237	0.102793	0.0318691
						-0.150156	0.340332	21.1347	0.0473155	0.141072		3.30754e-06	0.000623416	0.141383	0.11369		0	0.132024	21.374	0.0467858	0.101873		6.76659e-07	0.00045683	0.102101	0.0317403		0.150156	-0.340332	21.1347	0.0473155	0.141072		3.30754e-06	0.000623416	0.141383	0.11369		0.132024	0.0203248	21.3732	0.0467876	0.103023		6.84437e-07	0.000460215	0.103253	0.031869
						-0.149699	0.340757	21.1332	0.0473188	0.141695		3.57855e-06	0.000623441	0.142007	0.123		0	0.132481	21.3737	0.0467864	0.10233		6.76659e-07	0.00045683	0.102558	0.0317403		0.149699	-0.340757	21.1332	0.0473188	0.141695		3.57855e-06	0.000623441	0.142007	0.123		0.132481	0.0203805	21.3729	0.0467883	0.103483		6.844e-07	0.000460193	0.103714	0.0318688
						-0.149242	0.341181	21.1316	0.0473224	0.142318		3.57869e-06	0.000623466	0.14263	0.123001		0	0.132937	21.3734	0.0467871	0.102787		6.76659e-07	0.00045683	0.103015	0.0317403		0.149242	-0.341181	21.1316	0.0473224	0.142318		3.57869e-06	0.000623466	0.14263	0.123001		0.132937	0.0204361	21.3726	0.0467889	0.103944		6.84364e-07	0.000460171	0.104174	0.0318686
						-0.148785	0.341605	21.13	0.047326	0.142942		3.49433e-06	0.000623491	0.143254	0.120096		0	0.133394	21.3731	0.0467878	0.103243		6.76659e-07	0.00045683	0.103472	0.0317403		0.148785	-0.341605	21.13	0.047326	0.142942		3.49433e-06	0.000623491	0.143254	0.120096		0.133394	0.0204914	21.3723	0.0467896	0.104404		6.84328e-07	0.000460149	0.104634	0.0318685
						-0.148329	0.342029	21.1285	0.0473295	0.143565		3.46653e-06	0.000623385	0.143877	0.119161		0	0.133851	21.3728	0.0467885	0.1037		6.76659e-07	0.00045683	0.103929	0.0317403		0.148329	-0.342029	21.1285	0.0473295	0.143565		3.46653e-06	0.000623385	0.143877	0.119161		0.133851	0.0205466	21.3719	0.0467903	0.104864		6.84292e-07	0.000460127	0.105094	0.0318683
						-0.147872	0.342454	21.1269	0.0473329	0.144189		3.46573e-06	0.000623238	0.1445	0.119162		0	0.134308	21.3725	0.0467891	0.104157		6.76659e-07	0.00045683	0.104386	0.0317403		0.147872	-0.342454	21.1269	0.0473329	0.144189		3.46573e-06	0.000623238	0.1445	0.119162		0.134308	0.0206016	21.3716	0.046791	0.105324		6.84256e-07	0.000460106	0.105554	0.0318681
						-0.147415	0.342878	21.1254	0.0473364	0.144812		3.59976e-06	0.000623095	0.145124	0.123799		0	0.134765	21.3722	0.0467898	0.104614		6.76659e-07	0.00045683	0.104842	0.0317403		0.147415	-0.342878	21.1254	0.0473364	0.144812		3.59977e-06	0.000623095	0.145124	0.123799		0.134765	0.0206564	21.3713	0.0467917	0.105784		6.83591e-07	0.000460084	0.106014	0.0318386
						-0.146958	0.343301	21.1238	0.04734	0.145435		3.79082e-06	0.000622953	0.145747	0.130399		0	0.135222	21.3719	0.0467905	0.105071		6.76659e-07	0.00045683	0.105299	0.0317403		0.146958	-0.343301	21.1238	0.04734	0.145435		3.79082e-06	0.000622953	0.145747	0.130399		0.135222	0.020711	21.371	0.0467924	0.106244		6.8209e-07	0.000460063	0.106474	0.0317702
						-0.146501	0.343725	21.1221	0.0473438	0.146058		3.78998e-06	0.000622814	0.14637	0.130399		0	0.135678	21.3716	0.0467912	0.105528		7.07907e-07	0.00045683	0.105756	0.0332061		0.146501	-0.343725	21.1221	0.0473438	0.146058		3.78998e-06	0.000622814	0.14637	0.130399		0.135678	0.0207655	21.3707	0.0467931	0.106704		7.14871e-07	0.000460042	0.106934	0.0332986
						-0.146044	0.344148	21.1204	0.0473476	0.146681		3.75933e-06	0.000622678	0.146992	0.129373		0	0.136135	21.3712	0.0467919	0.105984		7.07907e-07	0.00045683	0.106213	0.0332061		0.146044	-0.344148	21.1204	0.0473476	0.146681		3.75933e-06	0.000622678	0.146992	0.129373		0.136135	0.0208198	21.3704	0.0467938	0.107164		7.14833e-07	0.000460019	0.107394	0.0332985
						-0.145588	0.344571	21.1187	0.0473513	0.147304		3.69204e-06	0.000622593	0.147615	0.127074		0	0.136592	21.3709	0.0467926	0.106441		7.07907e-07	0.00045683	0.10667	0.0332061		0.145588	-0.344571	21.1187	0.0473513	0.147304		3.69204e-06	0.000622593	0.147615	0.127074		0.136592	0.0208738	21.37	0.0467945	0.107624		7.14795e-07	0.000459996	0.107854	0.0332984
						-0.145131	0.344994	21.1171	0.047355	0.147926		3.6922e-06	0.000622619	0.148238	0.127074		0	0.137049	21.3706	0.0467933	0.106898		7.07907e-07	0.00045683	0.107127	0.0332061		0.145131	-0.344994	21.1171	0.047355	0.147926		3.6922e-06	0.000622619	0.148238	0.127074		0.137049	0.0209277	21.3697	0.0467952	0.108084		7.14758e-07	0.000459974	0.108314	0.0332982
						-0.144674	0.345417	21.1154	0.0473587	0.148549		3.9389e-06	0.000622647	0.14886	0.135559		0	0.137506	21.3703	0.046794	0.107355		7.07907e-07	0.00045683	0.107583	0.0332061		0.144674	-0.345417	21.1154	0.0473587	0.148549		3.9389e-06	0.000622647	0.14886	0.135559		0.137506	0.0209814	21.3694	0.0467959	0.108544		7.1472e-07	0.000459951	0.108774	0.0332981
						-0.144217	0.34584	21.1137	0.0473627	0.149171		4.04338e-06	0.000622674	0.149483	0.139149		0	0.137963	21.3699	0.0467947	0.107812		7.07907e-07	0.00045683	0.10804	0.0332061		0.144217	-0.34584	21.1137	0.0473627	0.149171		4.04338e-06	0.000622674	0.149483	0.139149		0.137963	0.0210349	21.3691	0.0467966	0.109004		7.14683e-07	0.000459929	0.109234	0.033298
						-0.14376	0.346264	21.1119	0.0473667	0.149794		4.04357e-06	0.000622702	0.150105	0.139149		0	0.138419	21.3696	0.0467954	0.108269		7.07907e-07	0.00045683	0.108497	0.0332061		0.14376	-0.346264	21.1119	0.0473667	0.149794		4.04357e-06	0.000622702	0.150105	0.139149		0.138419	0.0210882	21.3687	0.0467973	0.109464		7.14645e-07	0.000459907	0.109694	0.0332978
						-0.143303	0.346687	21.1101	0.0473707	0.150417		3.93179e-06	0.000622729	0.150728	0.135296		0	0.138876	21.3693	0.0467961	0.108725		7.07907e-07	0.00045683	0.108954	0.0332061		0.143303	-0.346687	21.1101	0.0473707	0.150417		3.93179e-06	0.000622729	0.150728	0.135296		0.138876	0.0211413	21.3684	0.0467981	0.109924		7.14608e-07	0.000459884	0.110154	0.0332977
						-0.142847	0.34711	21.1083	0.0473747	0.15104		3.91698e-06	0.000622593	0.151351	0.134816		0	0.139333	21.369	0.0467968	0.109182		7.07907e-07	0.00045683	0.109411	0.0332061		0.142847	-0.34711	21.1083	0.0473747	0.15104		3.91698e-06	0.000622593	0.151351	0.134816		0.139333	0.0211942	21.3681	0.0467988	0.110384		7.1353e-07	0.000459863	0.110614	0.0332491
						-0.14239	0.347533	21.1066	0.0473786	0.151662		3.91603e-06	0.00062244	0.151973	0.134817		0	0.13979	21.3686	0.0467975	0.109639		7.07907e-07	0.00045683	0.109868	0.0332061		0.14239	-0.347533	21.1066	0.0473786	0.151662		3.91603e-06	0.00062244	0.151973	0.134817		0.13979	0.021247	21.3678	0.0467995	0.110844		7.12257e-07	0.000459841	0.111074	0.0331913
						-0.141933	0.347956	21.1048	0.0473825	0.152285		4.28733e-06	0.000622288	0.152596	0.147635		0	0.140247	21.3683	0.0467983	0.110096		7.07907e-07	0.00045683	0.110324	0.0332061		0.141933	-0.347956	21.1048	0.0473825	0.152285		4.28733e-06	0.000622288	0.152596	0.147635		0.140247	0.0212995	21.3674	0.0468002	0.111304		7.12221e-07	0.000459819	0.111534	0.0331912
						-0.141476	0.348378	21.1029	0.0473868	0.152907		4.28949e-06	0.00062214	0.153218	0.147745		0	0.140704	21.368	0.046799	0.110553		7.40163e-07	0.00045683	0.110781	0.0347191		0.141476	-0.348378	21.1029	0.0473868	0.152907		4.28949e-06	0.00062214	0.153218	0.147745		0.140704	0.0213518	21.3671	0.0468009	0.111764		7.46153e-07	0.000459797	0.111993	0.0347742
						-0.141019	0.348801	21.101	0.0473911	0.153529		4.25517e-06	0.000621994	0.15384	0.146597		0	0.14116	21.3677	0.0467997	0.11101		7.40163e-07	0.00045683	0.111238	0.0347191		0.141019	-0.348801	21.101	0.0473911	0.153529		4.25517e-06	0.000621994	0.15384	0.146597		0.14116	0.021404	21.3668	0.0468017	0.112223		7.46114e-07	0.000459774	0.112453	0.0347741
						-0.140562	0.349223	21.0991	0.0473953	0.154151		4.17995e-06	0.000621904	0.154462	0.144027		0	0.141617	21.3673	0.0468004	0.111466		7.40163e-07	0.00045683	0.111695	0.0347191		0.140562	-0.349223	21.0991	0.0473953	0.154151		4.17995e-06	0.000621904	0.154462	0.144027		0.141617	0.021456	21.3664	0.0468024	0.112683		7.46075e-07	0.000459751	0.112913	0.034774
						-0.140106	0.349645	21.0973	0.0473995	0.154773		4.18016e-06	0.000621934	0.155084	0.144027		0	0.142074	21.367	0.0468012	0.111923		7.40163e-07	0.00045683	0.112152	0.0347191		0.140106	-0.349645	21.0973	0.0473995	0.154773		4.18016e-06	0.000621934	0.155084	0.144027		0.142074	0.0215077	21.3661	0.0468031	0.113143		7.46036e-07	0.000459728	0.113373	0.0347739
						-0.139649	0.350067	21.0954	0.0474037	0.155395		4.29172e-06	0.000621965	0.155706	0.147863		0	0.142531	21.3666	0.0468019	0.11238		7.40163e-07	0.00045683	0.112608	0.0347191		0.139649	-0.350067	21.0954	0.0474037	0.155395		4.29172e-06	0.000621965	0.155706	0.147863		0.142531	0.0215592	21.3657	0.0468039	0.113603		7.45997e-07	0.000459705	0.113832	0.0347739
						-0.139192	0.350489	21.0935	0.047408	0.156017		4.58581e-06	0.000621996	0.156328	0.157988		0	0.142988	21.3663	0.0468027	0.112837		7.40163e-07	0.00045683	0.113065	0.0347191		0.139192	-0.350489	21.0935	0.047408	0.156017		4.58581e-06	0.000621996	0.156328	0.157988		0.142988	0.0216106	21.3654	0.0468046	0.114062		7.45958e-07	0.000459682	0.114292	0.0347738
						-0.138735	0.350911	21.0914	0.0474126	0.156639		4.58605e-06	0.000622028	0.15695	0.157988		0	0.143444	21.366	0.0468034	0.113294		7.40163e-07	0.00045683	0.113522	0.0347191		0.138735	-0.350911	21.0914	0.0474126	0.156639		4.58605e-06	0.000622028	0.15695	0.157988		0.143444	0.0216617	21.3651	0.0468054	0.114522		7.4592e-07	0.00045966	0.114752	0.0347737
						-0.138278	0.351333	21.0894	0.0474172	0.157261		4.58628e-06	0.000622059	0.157572	0.157988		0	0.143901	21.3656	0.0468041	0.113751		7.40163e-07	0.00045683	0.113979	0.0347191		0.138278	-0.351333	21.0894	0.0474172	0.157261		4.58628e-06	0.000622059	0.157572	0.157988		0.143901	0.0217126	21.3647	0.0468061	0.114982		7.44457e-07	0.000459638	0.115211	0.0347072
						-0.137821	0.351755	21.0874	0.0474218	0.157883		4.44447e-06	0.000622091	0.158194	0.153095		0	0.144358	21.3653	0.0468049	0.114207		7.40163e-07	0.00045683	0.114436	0.0347191		0.137821	-0.351755	21.0874	0.0474218	0.157883		4.44447e-06	0.000622091	0.158194	0.153095		0.144358	0.0217634	21.3644	0.0468069	0.115441		7.43371e-07	0.000459615	0.115671	0.0346582
						-0.137365	0.352178	21.0854	0.0474262	0.158505		4.44215e-06	0.000621929	0.158816	0.153055		0	0.144815	21.365	0.0468056	0.114664		7.40163e-07	0.00045683	0.114893	0.0347191		0.137365	-0.352178	21.0854	0.0474262	0.158505		4.44215e-06	0.000621929	0.158816	0.153055		0.144815	0.0218139	21.364	0.0468076	0.115901		7.43334e-07	0.000459593	0.116131	0.0346581
						-0.136908	0.3526	21.0834	0.0474306	0.159127		4.68401e-06	0.000621768	0.159438	0.16143		0	0.145272	21.3646	0.0468064	0.115121		7.40163e-07	0.00045683	0.115349	0.0347191		0.136908	-0.3526	21.0834	0.0474306	0.159127		4.68401e-06	0.000621768	0.159438	0.16143		0.145272	0.0218642	21.3637	0.0468084	0.11636		7.43296e-07	0.000459571	0.11659	0.0346581
						-0.136451	0.353021	21.0813	0.0474353	0.159749		4.87555e-06	0.00062161	0.16006	0.168074		0	0.145729	21.3643	0.0468071	0.115578		7.73541e-07	0.00045683	0.115806	0.0362848		0.136451	-0.353021	21.0813	0.0474353	0.159749		4.87555e-06	0.00062161	0.16006	0.168074		0.145729	0.0219143	21.3634	0.0468091	0.11682		7.78506e-07	0.00045955	0.11705	0.0363015
						-0.135994	0.353443	21.0792	0.0474402	0.16037		4.83672e-06	0.000621454	0.160681	0.166777		0	0.146185	21.3639	0.0468079	0.116035		7.73541e-07	0.00045683	0.116263	0.0362848		0.135994	-0.353443	21.0792	0.0474402	0.16037		4.83672e-06	0.000621454	0.160681	0.166777		0.146185	0.0219643	21.363	0.0468099	0.11728		7.78465e-07	0.000459526	0.117509	0.0363015
						-0.135537	0.353864	21.077	0.047445	0.160992		4.75176e-06	0.00062136	0.161302	0.163873		0	0.146642	21.3636	0.0468087	0.116492		7.73541e-07	0.00045683	0.11672	0.0362848		0.135537	-0.353864	21.077	0.047445	0.160992		4.75176e-06	0.00062136	0.161302	0.163873		0.146642	0.022014	21.3627	0.0468107	0.117739		7.78425e-07	0.000459503	0.117969	0.0363015
						-0.135081	0.354285	21.0749	0.0474498	0.161613		4.75204e-06	0.000621396	0.161924	0.163873		0	0.147099	21.3632	0.0468094	0.116948		7.73541e-07	0.00045683	0.117177	0.0362848		0.135081	-0.354285	21.0749	0.0474498	0.161613		4.75204e-06	0.000621396	0.161924	0.163873		0.147099	0.0220635	21.3623	0.0468114	0.118199		7.78385e-07	0.00045948	0.118428	0.0363014
						-0.134624	0.354707	21.0728	0.0474545	0.162235		4.75232e-06	0.000621433	0.162545	0.163873		0	0.147556	21.3629	0.0468102	0.117405		7.73541e-07	0.00045683	0.117634	0.0362848		0.134624	-0.354707	21.0728	0.0474545	0.162235		4.75232e-06	0.000621433	0.162545	0.163873		0.147556	0.0221128	21.3619	0.0468122	0.118658		7.78345e-07	0.000459456	0.118888	0.0363014
						-0.134167	0.355128	21.0707	0.0474593	0.162856		5.14772e-06	0.00062147	0.163167	0.177497		0	0.148013	21.3625	0.046811	0.117862		7.73541e-07	0.00045683	0.11809	0.0362848		0.134167	-0.355128	21.0707	0.0474593	0.162856		5.14772e-06	0.00062147	0.163167	0.177497		0.148013	0.0221618	21.3616	0.046813	0.119118		7.78305e-07	0.000459434	0.119347	0.0363013
						-0.13371	0.355549	21.0684	0.0474644	0.163477		5.22583e-06	0.000621507	0.163788	0.180179		0	0.14847	21.3622	0.0468117	0.118319		7.73541e-07	0.00045683	0.118547	0.0362848		0.13371	-0.355549	21.0684	0.0474644	0.163477		5.22583e-06	0.000621507	0.163788	0.180179		0.14847	0.0222107	21.3612	0.0468138	0.119577		7.76506e-07	0.000459411	0.119807	0.0362192
						-0.133253	0.355971	21.0661	0.0474697	0.164099		5.22615e-06	0.000621544	0.16441	0.180179		0	0.148926	21.3618	0.0468125	0.118776		7.73541e-07	0.00045683	0.119004	0.0362848		0.133253	-0.355971	21.0661	0.0474697	0.164099		5.22615e-06	0.000621544	0.16441	0.180179		0.148926	0.0222593	21.3609	0.0468146	0.120036		7.75544e-07	0.000459388	0.120266	0.0361761
						-0.132796	0.356392	21.0638	0.0474749	0.16472		5.21488e-06	0.000621582	0.165031	0.17978		0	0.149383	21.3615	0.0468133	0.119233		7.73541e-07	0.00045683	0.119461	0.0362848		0.132796	-0.356392	21.0638	0.0474749	0.16472		5.21488e-06	0.000621582	0.165031	0.17978		0.149383	0.0223077	21.3605	0.0468153	0.120496		7.75506e-07	0.000459366	0.120725	0.0361761
						-0.13234	0.356814	21.0615	0.0474801	0.165342		5.06225e-06	0.000621606	0.165653	0.174511		0	0.14984	21.3611	0.0468141	0.119689		7.73541e-07	0.00045683	0.119918	0.0362848		0.13234	-0.356814	21.0615	0.0474801	0.165342		5.06225e-06	0.000621606	0.165653	0.174511		0.14984	0.0223559	21.3602	0.0468161	0.120955		7.75467e-07	0.000459344	0.121185	0.036176
						-0.131883	0.357235	21.0592	0.0474852	0.165964		5.1191e-06	0.000621435	0.166274	0.17652		0	0.150297	21.3607	0.0468148	0.120146		7.73541e-07	0.00045683	0.120375	0.0362848		0.131883	-0.357235	21.0592	0.0474852	0.165964		5.1191e-06	0.000621435	0.166274	0.17652		0.150297	0.0224039	21.3598	0.0468169	0.121414		7.75429e-07	0.000459322	0.121644	0.036176
						-0.131426	0.357656	21.0569	0.0474903	0.166585		5.57082e-06	0.000621268	0.166896	0.192148		0	0.150754	21.3604	0.0468156	0.120603		8.08166e-07	0.00045683	0.120831	0.037909		0.131426	-0.357656	21.0569	0.0474903	0.166585		5.57082e-06	0.000621268	0.166896	0.192148		0.150754	0.0224517	21.3595	0.0468177	0.121874		8.12054e-07	0.0004593	0.122103	0.0378864
						-0.130969	0.358078	21.0545	0.0474959	0.167206		5.52639e-06	0.000621104	0.167517	0.190666		0	0.151211	21.36	0.0468164	0.12106		8.08166e-07	0.00045683	0.121288	0.037909		0.130969	-0.358078	21.0545	0.0474959	0.167206		5.52639e-06	0.000621104	0.167517	0.190666		0.151211	0.0224993	21.3591	0.0468185	0.122333		8.12013e-07	0.000459277	0.122563	0.0378864
						-0.130512	0.358498	21.052	0.0475014	0.167827		5.4293e-06	0.000621007	0.168138	0.187345		0	0.151667	21.3597	0.0468172	0.121517		8.08166e-07	0.00045683	0.121745	0.037909		0.130512	-0.358498	21.052	0.0475014	0.167827		5.4293e-06	0.000621007	0.168138	0.187345		0.151667	0.0225466	21.3587	0.0468193	0.122792		8.11972e-07	0.000459253	0.123022	0.0378865
						-0.130055	0.358919	21.0496	0.0475068	0.168448		5.4297e-06	0.000621052	0.168759	0.187345		0	0.152124	21.3593	0.046818	0.121974		8.08166e-07	0.00045683	0.122202	0.037909		0.130055	-0.358919	21.0496	0.0475068	0.168448		5.4297e-06	0.000621052	0.168759	0.187345		0.152124	0.0225937	21.3584	0.0468201	0.123252		8.11931e-07	0.00045923	0.123481	0.0378865
						-0.129599	0.35934	21.0472	0.0475122	0.16907		5.4301e-06	0.000621098	0.16938	0.187346		0	0.152581	21.3589	0.0468188	0.12243		8.08166e-07	0.00045683	0.122659	0.037909		0.129599	-0.35934	21.0472	0.0475122	0.16907		5.4301e-06	0.000621098	0.16938	0.187346		0.152581	0.0226406	21.358	0.0468209	0.123711		8.1189e-07	0.000459207	0.12394	0.0378865
						-0.129142	0.359761	21.0448	0.0475177	0.169691		5.64723e-06	0.000621144	0.170001	0.194822		0	0.153038	21.3586	0.0468197	0.122887		8.08166e-07	0.00045683	0.123116	0.037909		0.129142	-0.359761	21.0448	0.0475177	0.169691		5.64723e-06	0.000621144	0.170001	0.194822		0.153038	0.0226873	21.3576	0.0468217	0.12417		8.0983e-07	0.000459184	0.1244	0.0377922
						-0.128685	0.360181	21.0423	0.0475233	0.170312		5.98927e-06	0.00062119	0.170622	0.206607		0	0.153495	21.3582	0.0468205	0.123344		8.08166e-07	0.00045683	0.123572	0.037909		0.128685	-0.360181	21.0423	0.0475233	0.170312		5.98927e-06	0.00062119	0.170622	0.206607		0.153495	0.0227337	21.3572	0.0468225	0.124629		8.08899e-07	0.000459161	0.124859	0.0377506
						-0.128228	0.360602	21.0396	0.0475293	0.170933		5.98973e-06	0.000621237	0.171244	0.206607		0	0.153952	21.3578	0.0468213	0.123801		8.08166e-07	0.00045683	0.124029	0.037909		0.128228	-0.360602	21.0396	0.0475293	0.170933		5.98973e-06	0.000621237	0.171244	0.206607		0.153952	0.02278	21.3569	0.0468233	0.125088		8.0886e-07	0.000459139	0.125318	0.0377507
						-0.127771	0.361023	21.037	0.0475353	0.171554		5.99019e-06	0.000621285	0.171865	0.206607		0	0.154408	21.3574	0.0468221	0.124258		8.08166e-07	0.00045683	0.124486	0.037909		0.127771	-0.361023	21.037	0.0475353	0.171554		5.99019e-06	0.000621285	0.171865	0.206607		0.154408	0.0228259	21.3565	0.0468241	0.125548		8.08821e-07	0.000459117	0.125777	0.0377507
						-0.127314	0.361444	21.0343	0.0475413	0.172175		5.96511e-06	0.000621332	0.172486	0.205726		0	0.154865	21.3571	0.0468229	0.124714		8.08166e-07	0.00045683	0.124943	0.037909		0.127314	-0.361444	21.0343	0.0475413	0.172175		5.96511e-06	0.000621332	0.172486	0.205726		0.154865	0.0228717	21.3561	0.0468249	0.126007		8.08783e-07	0.000459095	0.126236	0.0377507
						-0.126858	0.361866	21.0317	0.0475473	0.172797		5.80034e-06	0.00062135	0.173108	0.200038		0	0.155322	21.3567	0.0468237	0.125171		8.08166e-07	0.00045683	0.1254	0.037909		0.126858	-0.361866	21.0317	0.0475473	0.172797		5.80034e-06	0.00062135	0.173108	0.200038		0.155322	0.0229173	21.3558	0.0468258	0.126466		8.08744e-07	0.000459073	0.126695	0.0377507
						-0.126401	0.362287	21.0291	0.0475531	0.173418		6.20211e-06	0.000621176	0.173729	0.213954		0	0.155779	21.3563	0.0468245	0.125628		8.44177e-07	0.00045683	0.125857	0.0395981		0.126401	-0.362287	21.0291	0.0475531	0.173418		6.20211e-06	0.000621176	0.173729	0.213954		0.155779	0.0229626	21.3554	0.0468266	0.126925		8.46936e-07	0.000459051	0.127154	0.0395353
						-0.125944	0.362708	21.0264	0.0475593	0.174039		6.35478e-06	0.000621005	0.17435	0.219281		0	0.156236	21.356	0.0468253	0.126085		8.44177e-07	0.00045683	0.126313	0.0395981		0.125944	-0.362708	21.0264	0.0475593	0.174039		6.35478e-06	0.000621005	0.17435	0.219281		0.156236	0.0230077	21.355	0.0468274	0.127384		8.46894e-07	0.000459028	0.127613	0.0395353
						-0.125487	0.363128	21.0236	0.0475656	0.17466		6.24238e-06	0.000620908	0.174971	0.215436		0	0.156693	21.3556	0.0468262	0.126542		8.44177e-07	0.00045683	0.12677	0.0395981		0.125487	-0.363128	21.0236	0.0475656	0.17466		6.24238e-06	0.000620908	0.174971	0.215436		0.156693	0.0230526	21.3546	0.0468283	0.127843		8.46853e-07	0.000459004	0.128072	0.0395354
						-0.12503	0.363549	21.0208	0.0475719	0.175281		6.24299e-06	0.000620967	0.175592	0.215436		0	0.157149	21.3552	0.046827	0.126999		8.44177e-07	0.00045683	0.127227	0.0395981		0.12503	-0.363549	21.0208	0.0475719	0.175281		6.24299e-06	0.000620967	0.175592	0.215436		0.157149	0.0230972	21.3542	0.0468291	0.128302		8.46811e-07	0.000458981	0.128531	0.0395354
						-0.124573	0.363969	21.0181	0.0475781	0.175902		6.24359e-06	0.000621027	0.176213	0.215436		0	0.157606	21.3548	0.0468279	0.127455		8.44177e-07	0.00045683	0.127684	0.0395981		0.124573	-0.363969	21.0181	0.0475781	0.175902		6.24359e-06	0.000621027	0.176213	0.215436		0.157606	0.0231416	21.3539	0.04683	0.128761		8.44601e-07	0.000458959	0.12899	0.0394342
						-0.124117	0.36439	21.0153	0.0475843	0.176523		6.24421e-06	0.000621088	0.176834	0.215436		0	0.158063	21.3544	0.0468287	0.127912		8.44177e-07	0.00045683	0.128141	0.0395981		0.124117	-0.36439	21.0153	0.0475843	0.176523		6.24421e-06	0.000621088	0.176834	0.215436		0.158063	0.0231857	21.3535	0.0468308	0.12922		8.43574e-07	0.000458936	0.129449	0.0393882
						-0.12366	0.364811	21.0126	0.0475906	0.177144		6.87091e-06	0.000621149	0.177455	0.237036		0	0.15852	21.354	0.0468296	0.128369		8.44177e-07	0.00045683	0.128598	0.0395981		0.12366	-0.364811	21.0126	0.0475906	0.177144		6.87091e-06	0.000621149	0.177455	0.237036		0.15852	0.0232297	21.3531	0.0468316	0.129679		8.43534e-07	0.000458914	0.129908	0.0393883
						-0.123203	0.365232	21.0095	0.0475975	0.177765		6.91342e-06	0.000621211	0.178076	0.238478		0	0.158977	21.3536	0.0468304	0.128826		8.44177e-07	0.00045683	0.129054	0.0395981		0.123203	-0.365232	21.0095	0.0475975	0.177765		6.91342e-06	0.000621211	0.178076	0.238478		0.158977	0.0232733	21.3527	0.0468325	0.130138		8.43495e-07	0.000458891	0.130367	0.0393883
						-0.122746	0.365653	21.0065	0.0476044	0.178387		6.91411e-06	0.000621273	0.178697	0.238478		0	0.159434	21.3533	0.0468313	0.129283		8.44177e-07	0.00045683	0.129511	0.0395981		0.122746	-0.365653	21.0065	0.0476044	0.178387		6.91411e-06	0.000621273	0.178697	0.238478		0.159434	0.0233168	21.3523	0.0468333	0.130597		8.43456e-07	0.000458869	0.130826	0.0393884
						-0.122289	0.366074	21.0034	0.0476113	0.179008		6.91481e-06	0.000621336	0.179319	0.238479		0	0.15989	21.3529	0.0468321	0.12974		8.44177e-07	0.00045683	0.129968	0.0395981		0.122289	-0.366074	21.0034	0.0476113	0.179008		6.91481e-06	0.000621336	0.179319	0.238479		0.15989	0.02336	21.3519	0.0468342	0.131055		8.43417e-07	0.000458848	0.131285	0.0393885
						-0.121832	0.366495	21.0004	0.0476182	0.179629		6.87218e-06	0.000621398	0.17994	0.236984		0	0.160347	21.3525	0.0468329	0.130196		8.44177e-07	0.00045683	0.130425	0.0395981		0.121832	-0.366495	21.0004	0.0476182	0.179629		6.87218e-06	0.000621398	0.17994	0.236984		0.160347	0.023403	21.3515	0.046835	0.131514		8.43378e-07	0.000458826	0.131744	0.0393885
						-0.121376	0.366916	20.9973	0.0476251	0.180251		6.8493e-06	0.000621415	0.180561	0.236189		0	0.160804	21.3521	0.0468338	0.130653		8.81723e-07	0.00045683	0.130882	0.0413593		0.121376	-0.366916	20.9973	0.0476251	0.180251		6.8493e-06	0.000621415	0.180561	0.236189		0.160804	0.0234458	21.3512	0.0468359	0.131973		8.83304e-07	0.000458805	0.132203	0.0412551
						-0.120919	0.367337	20.9943	0.0476319	0.180872		7.36476e-06	0.000621241	0.181183	0.254035		0	0.161261	21.3517	0.0468347	0.13111		8.81723e-07	0.00045683	0.131339	0.0413593		0.120919	-0.367337	20.9943	0.0476319	0.180872		7.36476e-06	0.000621241	0.181183	0.254035		0.161261	0.0234883	21.3508	0.0468367	0.132432		8.83262e-07	0.000458781	0.132661	0.0412552
						-0.120462	0.367758	20.9911	0.0476393	0.181493		7.23272e-06	0.000621149	0.181804	0.249518		0	0.161718	21.3513	0.0468356	0.131567		8.81723e-07	0.00045683	0.131795	0.0413593		0.120462	-0.367758	20.9911	0.0476393	0.181493		7.23272e-06	0.000621149	0.181804	0.249518		0.161718	0.0235306	21.3504	0.0468376	0.132891		8.8322e-07	0.000458759	0.13312	0.0412553
						-0.120005	0.368179	20.9879	0.0476465	0.182115		7.23368e-06	0.000621231	0.182425	0.249518		0	0.162175	21.3509	0.0468364	0.132024		8.81723e-07	0.00045683	0.132252	0.0413593		0.120005	-0.368179	20.9879	0.0476465	0.182115		7.23368e-06	0.000621231	0.182425	0.249518		0.162175	0.0235726	21.35	0.0468385	0.13335		8.81009e-07	0.000458736	0.133579	0.0411541
						-0.119548	0.3686	20.9847	0.0476538	0.182736		7.23464e-06	0.000621313	0.183046	0.249518		0	0.162631	21.3505	0.0468373	0.132481		8.81723e-07	0.00045683	0.132709	0.0413593		0.119548	-0.3686	20.9847	0.0476538	0.182736		7.23464e-06	0.000621313	0.183046	0.249518		0.162631	0.0236144	21.3496	0.0468394	0.133808		8.79716e-07	0.000458714	0.134038	0.0410957
						-0.119091	0.369021	20.9815	0.047661	0.183357		7.23562e-06	0.000621397	0.183668	0.249518		0	0.163088	21.3501	0.0468382	0.132937		8.81723e-07	0.00045683	0.133166	0.0413593		0.119091	-0.369021	20.9815	0.047661	0.183357		7.23562e-06	0.000621397	0.183668	0.249518		0.163088	0.0236559	21.3492	0.0468403	0.134267		8.79677e-07	0.000458691	0.134496	0.0410958
						-0.118635	0.369443	20.9783	0.0476682	0.183978		7.6337e-06	0.000621481	0.184289	0.26321		0	0.163545	21.3497	0.0468391	0.133394		8.81723e-07	0.00045683	0.133623	0.0413593		0.118635	-0.369443	20.9783	0.0476682	0.183978		7.6337e-06	0.000621481	0.184289	0.26321		0.163545	0.0236972	21.3488	0.0468411	0.134726		8.79637e-07	0.000458669	0.134955	0.041096
						-0.118178	0.369864	20.975	0.0476759	0.1846		8.04893e-06	0.000621566	0.184911	0.277489		0	0.164002	21.3493	0.04684	0.133851		8.81723e-07	0.00045683	0.134079	0.0413593		0.118178	-0.369864	20.975	0.0476759	0.1846		8.04893e-06	0.000621566	0.184911	0.277489		0.164002	0.0237382	21.3483	0.046842	0.135184		8.79598e-07	0.000458648	0.135414	0.0410961
						-0.117721	0.370285	20.9714	0.0476839	0.185222		8.05004e-06	0.000621651	0.185532	0.27749		0	0.164459	21.3489	0.0468408	0.134308		8.81723e-07	0.00045683	0.134536	0.0413593		0.117721	-0.370285	20.9714	0.0476839	0.185222		8.05004e-06	0.000621651	0.185532	0.27749		0.164459	0.023779	21.3479	0.0468429	0.135643		8.79559e-07	0.000458626	0.135872	0.0410962
						-0.117264	0.370707	20.9679	0.047692	0.185843		8.05116e-06	0.000621737	0.186154	0.27749		0	0.164915	21.3485	0.0468417	0.134765		8.81723e-07	0.00045683	0.134993	0.0413593		0.117264	-0.370707	20.9679	0.047692	0.185843		8.05116e-06	0.000621737	0.186154	0.27749		0.164915	0.0238196	21.3475	0.0468438	0.136102		8.7952e-07	0.000458605	0.136331	0.0410963
						-0.116807	0.371129	20.9644	0.0477	0.186465		8.05228e-06	0.000621823	0.186776	0.27749		0	0.165372	21.3481	0.0468426	0.135222		8.81723e-07	0.00045683	0.13545	0.0413593		0.116807	-0.371129	20.9644	0.0477	0.186465		8.05228e-06	0.000621823	0.186776	0.27749		0.165372	0.0238599	21.3471	0.0468447	0.13656		8.79481e-07	0.000458584	0.136789	0.0410963
						-0.11635	0.371551	20.9608	0.0477081	0.187087		7.98279e-06	0.00062191	0.187398	0.275057		0	0.165829	21.3477	0.0468435	0.135678		9.20973e-07	0.00045683	0.135907	0.0432004		0.11635	-0.371551	20.9608	0.0477081	0.187087		7.98279e-06	0.00062191	0.187398	0.275057		0.165829	0.0239	21.3467	0.0468455	0.137019		9.21325e-07	0.000458563	0.137248	0.0430536
						-0.115894	0.371973	20.9573	0.047716	0.187709		8.41166e-06	0.000621928	0.18802	0.289826		0	0.166286	21.3473	0.0468444	0.136135		9.20973e-07	0.00045683	0.136364	0.0432004		0.115894	-0.371973	20.9573	0.047716	0.187709		8.41166e-06	0.000621928	0.18802	0.289826		0.166286	0.0239398	21.3463	0.0468465	0.137477		9.21283e-07	0.00045854	0.137707	0.0430537
						-0.115437	0.372395	20.9536	0.0477245	0.188331		8.4605e-06	0.000621848	0.188641	0.291546		0	0.166743	21.3468	0.0468453	0.136592		9.20973e-07	0.00045683	0.13682	0.0432004		0.115437	-0.372395	20.9536	0.0477245	0.188331		8.4605e-06	0.000621848	0.188641	0.291546		0.166743	0.0239794	21.3459	0.0468474	0.137936		9.19271e-07	0.000458518	0.138165	0.0429618
						-0.11498	0.372817	20.9499	0.0477329	0.188952		8.46209e-06	0.000621964	0.189263	0.291546		0	0.1672	21.3464	0.0468463	0.137049		9.20973e-07	0.00045683	0.137277	0.0432004		0.11498	-0.372817	20.9499	0.0477329	0.188952		8.46209e-06	0.000621964	0.189263	0.291546		0.1672	0.0240187	21.3455	0.0468483	0.138394		9.17493e-07	0.000458496	0.138624	0.0428807
						-0.114523	0.373239	20.9462	0.0477414	0.189574		8.46369e-06	0.000622082	0.189885	0.291546		0	0.167656	21.346	0.0468472	0.137506		9.20973e-07	0.00045683	0.137734	0.0432004		0.114523	-0.373239	20.9462	0.0477414	0.189574		8.46369e-06	0.000622082	0.189885	0.291546		0.167656	0.0240577	21.3451	0.0468492	0.138853		9.17453e-07	0.000458474	0.139082	0.0428809
						-0.114066	0.373661	20.9425	0.0477498	0.190196		8.4653e-06	0.000622201	0.190508	0.291546		0	0.168113	21.3456	0.0468481	0.137963		9.20973e-07	0.00045683	0.138191	0.0432004		0.114066	-0.373661	20.9425	0.0477498	0.190196		8.4653e-06	0.000622201	0.190508	0.291546		0.168113	0.0240965	21.3447	0.0468501	0.139311		9.17414e-07	0.000458453	0.139541	0.0428811
						-0.11361	0.374083	20.9388	0.0477583	0.190819		8.52023e-06	0.00062232	0.19113	0.293381		0	0.16857	21.3452	0.046849	0.138419		9.20973e-07	0.00045683	0.138648	0.0432004		0.11361	-0.374083	20.9388	0.0477583	0.190819		8.52023e-06	0.00062232	0.19113	0.293381		0.16857	0.0241351	21.3442	0.0468511	0.13977		9.17375e-07	0.000458431	0.139999	0.0428813
						-0.113153	0.374506	20.935	0.0477668	0.191441		9.47217e-06	0.000622441	0.191752	0.326097		0	0.169027	21.3447	0.0468499	0.138876		9.20973e-07	0.00045683	0.139105	0.0432004		0.113153	-0.374506	20.935	0.0477668	0.191441		9.47217e-06	0.000622441	0.191752	0.326097		0.169027	0.0241734	21.3438	0.046852	0.140228		9.17336e-07	0.00045841	0.140457	0.0428814
						-0.112696	0.374929	20.9309	0.0477763	0.192063		9.47403e-06	0.000622562	0.192375	0.326097		0	0.169484	21.3443	0.0468509	0.139333		9.20973e-07	0.00045683	0.139561	0.0432004		0.112696	-0.374929	20.9309	0.0477763	0.192063		9.47403e-06	0.000622562	0.192375	0.326097		0.169484	0.0242114	21.3434	0.0468529	0.140687		9.17297e-07	0.000458389	0.140916	0.0428816
						-0.112239	0.375352	20.9267	0.0477858	0.192686		9.47589e-06	0.000622684	0.192997	0.326097		0	0.169941	21.3439	0.0468518	0.13979		9.20973e-07	0.00045683	0.140018	0.0432004		0.112239	-0.375352	20.9267	0.0477858	0.192686		9.47589e-06	0.000622684	0.192997	0.326097		0.169941	0.0242492	21.343	0.0468538	0.141145		9.17258e-07	0.000458369	0.141374	0.0428817
						-0.111782	0.375775	20.9226	0.0477952	0.193309		9.47776e-06	0.000622806	0.19362	0.326098		0	0.170397	21.3435	0.0468527	0.140247		9.20973e-07	0.00045683	0.140475	0.0432004		0.111782	-0.375775	20.9226	0.0477952	0.193309		9.47776e-06	0.000622806	0.19362	0.326098		0.170397	0.0242867	21.3426	0.0468547	0.141603		9.1722e-07	0.000458348	0.141833	0.0428818
						-0.111325	0.376198	20.9184	0.0478047	0.193931		9.47963e-06	0.000622929	0.194243	0.326098		0	0.170854	21.3431	0.0468536	0.140704		9.6211e-07	0.00045683	0.140932	0.04513		0.111325	-0.376198	20.9184	0.0478047	0.193931		9.47963e-06	0.000622929	0.194243	0.326098		0.170854	0.024324	21.3421	0.0468556	0.142062		9.61185e-07	0.000458328	0.142291	0.0449392
						-0.110869	0.376622	20.9143	0.0478142	0.194554		9.662e-06	0.000623053	0.194866	0.332306		0	0.171311	21.3426	0.0468546	0.14116		9.6211e-07	0.00045683	0.141389	0.04513		0.110869	-0.376622	20.9143	0.0478142	0.194554		9.662e-06	0.000623053	0.194866	0.332306		0.171311	0.024361	21.3417	0.0468566	0.14252		9.5963e-07	0.000458306	0.142749	0.0448687
						-0.110412	0.377045	20.9101	0.0478239	0.195177		1.00157e-05	0.00062317	0.195489	0.344406		0	0.171768	21.3422	0.0468555	0.141617		9.6211e-07	0.00045683	0.141846	0.04513		0.110412	-0.377045	20.9101	0.0478239	0.195177		1.00157e-05	0.00062317	0.195489	0.344406		0.171768	0.0243978	21.3413	0.0468576	0.142978		9.57084e-07	0.000458285	0.143208	0.0447517
						-0.109955	0.377469	20.9057	0.0478339	0.195801		1.00184e-05	0.000623338	0.196112	0.344406		0	0.172225	21.3418	0.0468565	0.142074		9.6211e-07	0.00045683	0.142302	0.04513		0.109955	-0.377469	20.9057	0.0478339	0.195801		1.00184e-05	0.000623338	0.196112	0.344406		0.172225	0.0244343	21.3408	0.0468585	0.143437		9.57045e-07	0.000458264	0.143666	0.044752
						-0.109498	0.377893	20.9013	0.0478439	0.196424		1.00212e-05	0.000623509	0.196736	0.344406		0	0.172682	21.3413	0.0468575	0.142531		9.6211e-07	0.00045683	0.142759	0.04513		0.109498	-0.377893	20.9013	0.0478439	0.196424		1.00212e-05	0.000623509	0.196736	0.344406		0.172682	0.0244705	21.3404	0.0468595	0.143895		9.57006e-07	0.000458243	0.144124	0.0447522
						-0.109041	0.378318	20.8969	0.0478539	0.197047		1.00239e-05	0.000623681	0.197359	0.344406		0	0.173138	21.3409	0.0468584	0.142988		9.6211e-07	0.00045683	0.143216	0.04513		0.109041	-0.378318	20.8969	0.0478539	0.197047		1.00239e-05	0.000623681	0.197359	0.344406		0.173138	0.0245065	21.34	0.0468604	0.144353		9.56968e-07	0.000458222	0.144582	0.0447524
						-0.108584	0.378742	20.8926	0.0478639	0.197671		1.00267e-05	0.000623854	0.197983	0.344405		0	0.173595	21.3404	0.0468594	0.143444		9.6211e-07	0.00045683	0.143673	0.04513		0.108584	-0.378742	20.8926	0.0478639	0.197671		1.00267e-05	0.000623854	0.197983	0.344405		0.173595	0.0245421	21.3395	0.0468614	0.144811		9.56929e-07	0.000458202	0.145041	0.0447526
						-0.108128	0.379167	20.8882	0.047874	0.198295		1.08422e-05	0.000624029	0.198607	0.372313		0	0.174052	21.34	0.0468604	0.143901		9.6211e-07	0.00045683	0.14413	0.04513		0.108128	-0.379167	20.8882	0.047874	0.198295		1.08422e-05	0.000624029	0.198607	0.372313		0.174052	0.0245776	21.3391	0.0468624	0.14527		9.56891e-07	0.000458181	0.145499	0.0447528
						-0.107671	0.379592	20.8834	0.0478848	0.198919		1.13022e-05	0.000624206	0.199231	0.387998		0	0.174509	21.3396	0.0468613	0.144358		9.6211e-07	0.00045683	0.144587	0.04513		0.107671	-0.379592	20.8834	0.0478848	0.198919		1.13022e-05	0.000624206	0.199231	0.387998		0.174509	0.0246128	21.3387	0.0468633	0.145728		9.56853e-07	0.000458161	0.145957	0.044753
						-0.107214	0.380018	20.8785	0.0478961	0.199543		1.13054e-05	0.000624383	0.199855	0.387998		0	0.174966	21.3391	0.0468623	0.144815		9.6211e-07	0.00045683	0.145043	0.04513		0.107214	-0.380018	20.8785	0.0478961	0.199543		1.13054e-05	0.000624383	0.199855	0.387998		0.174966	0.0246477	21.3382	0.0468643	0.146186		9.56815e-07	0.000458142	0.146415	0.0447531
						-0.106757	0.380443	20.8736	0.0479074	0.200168		1.13086e-05	0.000624561	0.20048	0.387998		0	0.175423	21.3387	0.0468632	0.145272		9.6211e-07	0.00045683	0.1455	0.04513		0.106757	-0.380443	20.8736	0.0479074	0.200168		1.13086e-05	0.000624561	0.20048	0.387998		0.175423	0.0246823	21.3378	0.0468652	0.146644		9.56777e-07	0.000458122	0.146873	0.0447533
						-0.1063	0.380869	20.8687	0.0479187	0.200792		1.13118e-05	0.00062474	0.201105	0.387998		0	0.175879	21.3382	0.0468642	0.145729		1.00534e-06	0.00045683	0.145957	0.0471577		0.1063	-0.380869	20.8687	0.0479187	0.200792		1.13118e-05	0.00062474	0.201105	0.387998		0.175879	0.0247167	21.3373	0.0468662	0.147102		1.00236e-06	0.000458103	0.147331	0.0468873
						-0.105843	0.381295	20.8637	0.04793	0.201417		1.12086e-05	0.00062492	0.201729	0.384347		0	0.176336	21.3378	0.0468652	0.146185		1.00534e-06	0.00045683	0.146414	0.0471577		0.105843	-0.381295	20.8637	0.04793	0.201417		1.12086e-05	0.00062492	0.201729	0.384347		0.176336	0.0247508	21.3369	0.0468672	0.14756		9.9869e-07	0.000458082	0.147789	0.0467178
						-0.105387	0.381722	20.8589	0.0479412	0.202042		1.21239e-05	0.000625214	0.202354	0.415535		0	0.176793	21.3373	0.0468662	0.146642		1.00534e-06	0.00045683	0.146871	0.0471577		0.105387	-0.381722	20.8589	0.0479412	0.202042		1.21239e-05	0.000625214	0.202354	0.415535		0.176793	0.0247847	21.3364	0.0468682	0.148018		9.98653e-07	0.000458062	0.148247	0.0467181
						-0.10493	0.382148	20.8536	0.0479534	0.202667		1.20433e-05	0.000625592	0.20298	0.412524		0	0.17725	21.3369	0.0468672	0.147099		1.00534e-06	0.00045683	0.147328	0.0471577		0.10493	-0.382148	20.8536	0.0479534	0.202667		1.20433e-05	0.000625592	0.20298	0.412524		0.17725	0.0248183	21.336	0.0468692	0.148476		9.98615e-07	0.000458042	0.148705	0.0467184
						-0.104473	0.382576	20.8484	0.0479654	0.203293		1.2048e-05	0.00062584	0.203606	0.412523		0	0.177707	21.3364	0.0468682	0.147556		1.00534e-06	0.00045683	0.147784	0.0471577		0.104473	-0.382576	20.8484	0.0479654	0.203293		1.2048e-05	0.00062584	0.203606	0.412523		0.177707	0.0248516	21.3355	0.0468702	0.148935		9.98577e-07	0.000458022	0.149164	0.0467187
						-0.104016	0.383004	20.8431	0.0479775	0.203918		1.20529e-05	0.000626091	0.204232	0.412523		0	0.178164	21.336	0.0468692	0.148013		1.00534e-06	0.00045683	0.148241	0.0471577		0.104016	-0.383004	20.8431	0.0479775	0.203918		1.20529e-05	0.000626091	0.204232	0.412523		0.178164	0.0248846	21.3351	0.0468712	0.149393		9.9854e-07	0.000458002	0.149622	0.046719
						-0.103559	0.383432	20.8379	0.0479895	0.204545		1.20577e-05	0.000626345	0.204858	0.412522		0	0.17862	21.3355	0.0468702	0.14847		1.00534e-06	0.00045683	0.148698	0.0471577		0.103559	-0.383432	20.8379	0.0479895	0.204545		1.20577e-05	0.000626345	0.204858	0.412522		0.17862	0.0249173	21.3346	0.0468722	0.149851		9.98502e-07	0.000457983	0.15008	0.0467192
						-0.103102	0.38386	20.8326	0.0480016	0.205171		1.25037e-05	0.000626602	0.205484	0.427603		0	0.179077	21.335	0.0468712	0.148926		1.00534e-06	0.00045683	0.149155	0.0471577		0.103102	-0.38386	20.8326	0.0480016	0.205171		1.25037e-05	0.000626602	0.205484	0.427603		0.179077	0.0249498	21.3342	0.0468732	0.150309		9.98465e-07	0.000457964	0.150538	0.0467194
						-0.102646	0.384289	20.8272	0.0480141	0.205798		1.372e-05	0.000626862	0.206111	0.469005		0	0.179534	21.3346	0.0468722	0.149383		1.00534e-06	0.00045683	0.149612	0.0471577		0.102646	-0.384289	20.8272	0.0480141	0.205798		1.372e-05	0.000626862	0.206111	0.469005		0.179534	0.024982	21.3337	0.0468742	0.150766		9.98428e-07	0.000457945	0.150995	0.0467196
						-0.102189	0.384718	20.8213	0.0480278	0.206424		1.37257e-05	0.000627123	0.206738	0.469005		0	0.179991	21.3341	0.0468733	0.14984		1.00534e-06	0.00045683	0.150069	0.0471577		0.102189	-0.384718	20.8213	0.0480278	0.206424		1.37257e-05	0.000627123	0.206738	0.469005		0.179991	0.025014	21.3333	0.0468752	0.151224		9.98392e-07	0.000457926	0.151453	0.0467198
						-0.101732	0.385148	20.8153	0.0480415	0.207052		1.37314e-05	0.000627386	0.207365	0.469004		0	0.180448	21.3337	0.0468743	0.150297		1.00534e-06	0.00045683	0.150525	0.0471577		0.101732	-0.385148	20.8153	0.0480415	0.207052		1.37314e-05	0.000627386	0.207365	0.469004		0.180448	0.0250456	21.3328	0.0468762	0.151682		9.98355e-07	0.000457908	0.151911	0.04672
						-0.101275	0.385578	20.8094	0.0480553	0.207679		1.37372e-05	0.000627651	0.207993	0.469004		0	0.180905	21.3332	0.0468753	0.150754		1.05088e-06	0.00045683	0.150982	0.0492938		0.101275	-0.385578	20.8094	0.0480553	0.207679		1.37372e-05	0.000627651	0.207993	0.469004		0.180905	0.025077	21.3323	0.0468772	0.15214		1.043e-06	0.00045789	0.152369	0.0488113
						-0.100818	0.386008	20.8034	0.048069	0.208307		1.3606e-05	0.000627916	0.208621	0.464325		0	0.181361	21.3327	0.0468763	0.151211		1.05088e-06	0.00045683	0.151439	0.0492938		0.100818	-0.386008	20.8034	0.048069	0.208307		1.3606e-05	0.000627916	0.208621	0.464325		0.181361	0.0251082	21.3319	0.0468782	0.152598		1.04303e-06	0.00045787	0.152827	0.0488146
						-0.100361	0.386439	20.7975	0.0480826	0.208934		1.44419e-05	0.000628318	0.209249	0.492539		0	0.181818	21.3323	0.0468774	0.151667		1.05088e-06	0.00045683	0.151896	0.0492938		0.100361	-0.386439	20.7975	0.0480826	0.208934		1.44419e-05	0.000628318	0.209249	0.492539		0.181818	0.025139	21.3314	0.0468793	0.153056		1.04368e-06	0.000457851	0.153285	0.048847
						-0.0999046	0.386871	20.7913	0.048097	0.209563		1.48319e-05	0.000629021	0.209877	0.505274		0	0.182275	21.3318	0.0468784	0.152124		1.05088e-06	0.00045683	0.152353	0.0492938		0.0999046	-0.386871	20.7913	0.048097	0.209563		1.48319e-05	0.000629021	0.209877	0.505274		0.182275	0.0251696	21.3309	0.0468803	0.153514		1.04363e-06	0.000457832	0.153743	0.0488468
						-0.0994478	0.387303	20.7849	0.0481119	0.210192		1.47754e-05	0.000629433	0.210507	0.503021		0	0.182732	21.3313	0.0468795	0.152581		1.05088e-06	0.00045683	0.15281	0.0492938		0.0994478	-0.387303	20.7849	0.0481119	0.210192		1.47754e-05	0.000629433	0.210507	0.503021		0.182732	0.0251999	21.3304	0.0468813	0.153972		1.04358e-06	0.000457813	0.154201	0.0488466
						-0.098991	0.387736	20.7785	0.0481266	0.210821		1.4784e-05	0.000629799	0.211136	0.503019		0	0.183189	21.3308	0.0468805	0.153038		1.05088e-06	0.00045683	0.153266	0.0492938		0.098991	-0.387736	20.7785	0.0481266	0.210821		1.4784e-05	0.000629799	0.211136	0.503019		0.183189	0.0252299	21.33	0.0468824	0.15443		1.04354e-06	0.000457795	0.154658	0.0488463
						-0.0985341	0.38817	20.7721	0.0481414	0.211451		1.47927e-05	0.000630173	0.211766	0.503017		0	0.183646	21.3303	0.0468816	0.153495		1.05088e-06	0.00045683	0.153723	0.0492938		0.0985341	-0.38817	20.7721	0.0481414	0.211451		1.47927e-05	0.000630173	0.211766	0.503017		0.183646	0.0252596	21.3295	0.0468834	0.154887		1.04349e-06	0.000457777	0.155116	0.0488461
						-0.0980773	0.388604	20.7657	0.0481562	0.212081		1.48015e-05	0.000630551	0.212396	0.503015		0	0.184102	21.3299	0.0468826	0.153952		1.05088e-06	0.00045683	0.15418	0.0492938		0.0980773	-0.388604	20.7657	0.0481562	0.212081		1.48015e-05	0.000630551	0.212396	0.503015		0.184102	0.025289	21.329	0.0468845	0.155345		1.04344e-06	0.000457759	0.155574	0.0488458
						-0.0976205	0.389038	20.7594	0.048171	0.212712		1.69425e-05	0.000630935	0.213027	0.575424		0	0.184559	21.3294	0.0468837	0.154408		1.05088e-06	0.00045683	0.154637	0.0492938		0.0976205	-0.389038	20.7594	0.048171	0.212712		1.69425e-05	0.000630935	0.213027	0.575424		0.184559	0.0253182	21.3285	0.0468855	0.155803		1.0434e-06	0.000457742	0.156032	0.0488455
						-0.0971637	0.389473	20.7521	0.048188	0.213343		1.70517e-05	0.000631324	0.213658	0.578775		0	0.185016	21.3289	0.0468847	0.154865		1.05088e-06	0.00045683	0.155094	0.0492938		0.0971637	-0.389473	20.7521	0.048188	0.213343		1.70517e-05	0.000631324	0.213658	0.578775		0.185016	0.025347	21.3281	0.0468866	0.156261		1.04335e-06	0.000457724	0.156489	0.0488452
						-0.0967068	0.389909	20.7447	0.048205	0.213974		1.70622e-05	0.000631716	0.21429	0.578773		0	0.185473	21.3284	0.0468858	0.155322		1.05088e-06	0.00045683	0.15555	0.0492938		0.0967068	-0.389909	20.7447	0.048205	0.213974		1.70622e-05	0.000631716	0.21429	0.578773		0.185473	0.0253756	21.3276	0.0468876	0.156718		1.04002e-06	0.000457707	0.156947	0.048691
						-0.09625	0.390346	20.7374	0.0482221	0.214606		1.70728e-05	0.000632111	0.214922	0.578771		0	0.18593	21.328	0.0468868	0.155779		1.09898e-06	0.00045683	0.156007	0.0515501		0.09625	-0.390346	20.7374	0.0482221	0.214606		1.70728e-05	0.000632111	0.214922	0.578771		0.18593	0.025404	21.3271	0.0468886	0.157176		1.08991e-06	0.00045769	0.157405	0.0510285
						-0.0957932	0.390782	20.73	0.0482392	0.215238		1.68995e-05	0.000632509	0.215554	0.572534		0	0.186386	21.3275	0.0468879	0.156236		1.09898e-06	0.00045683	0.156464	0.0515501		0.0957932	-0.390782	20.73	0.0482392	0.215238		1.68995e-05	0.000632509	0.215554	0.572534		0.186386	0.025432	21.3266	0.0468897	0.157634		1.08986e-06	0.000457672	0.157863	0.0510283
						-0.0953363	0.39122	20.7228	0.0482561	0.21587		1.73584e-05	0.000633075	0.216187	0.587555		0	0.186843	21.327	0.046889	0.156693		1.09898e-06	0.00045683	0.156921	0.0515501		0.0953363	-0.39122	20.7228	0.0482561	0.21587		1.73584e-05	0.000633075	0.216187	0.587555		0.186843	0.0254598	21.3261	0.0468908	0.158091		1.08981e-06	0.000457655	0.15832	0.0510282
						-0.0948795	0.391658	20.7153	0.0482734	0.216503		1.89495e-05	0.000634015	0.21682	0.640462		0	0.1873	21.3265	0.0468901	0.157149		1.09898e-06	0.00045683	0.157378	0.0515501		0.0948795	-0.391658	20.7153	0.0482734	0.216503		1.89495e-05	0.000634015	0.21682	0.640462		0.1873	0.0254873	21.3256	0.0468919	0.158549		1.08977e-06	0.000457637	0.158778	0.051028
						-0.0944227	0.392098	20.7072	0.0482924	0.217137		1.86066e-05	0.000634827	0.217455	0.628068		0	0.187757	21.326	0.0468912	0.157606		1.09898e-06	0.00045683	0.157835	0.0515501		0.0944227	-0.392098	20.7072	0.0482924	0.217137		1.86066e-05	0.000634827	0.217455	0.628068		0.187757	0.0255144	21.3251	0.046893	0.159007		1.08972e-06	0.00045762	0.159235	0.0510278
						-0.0939658	0.392539	20.6992	0.048311	0.217772		1.86223e-05	0.000635366	0.21809	0.628065		0	0.188214	21.3255	0.0468923	0.158063		1.09898e-06	0.00045683	0.158291	0.0515501		0.0939658	-0.392539	20.6992	0.048311	0.217772		1.86223e-05	0.000635366	0.21809	0.628065		0.188214	0.0255413	21.3246	0.0468941	0.159464		1.08968e-06	0.000457603	0.159693	0.0510276
						-0.093509	0.39298	20.6913	0.0483296	0.218408		1.86384e-05	0.000635921	0.218726	0.628061		0	0.188671	21.325	0.0468934	0.15852		1.09898e-06	0.00045683	0.158748	0.0515501		0.093509	-0.39298	20.6913	0.0483296	0.218408		1.86384e-05	0.000635921	0.218726	0.628061		0.188671	0.0255679	21.3242	0.0468952	0.159922		1.08963e-06	0.000457587	0.160151	0.0510273
						-0.0930522	0.393423	20.6833	0.0483482	0.219044		1.86549e-05	0.000636488	0.219362	0.628056		0	0.189127	21.3245	0.0468945	0.158977		1.09898e-06	0.00045683	0.159205	0.0515501		0.0930522	-0.393423	20.6833	0.0483482	0.219044		1.86549e-05	0.000636488	0.219362	0.628056		0.189127	0.0255942	21.3237	0.0468963	0.160379		1.08959e-06	0.00045757	0.160608	0.0510271
						-0.0925954	0.393866	20.6753	0.0483669	0.21968		2.10036e-05	0.000637066	0.219999	0.706488		0	0.189584	21.324	0.0468956	0.159434		1.09898e-06	0.00045683	0.159662	0.0515501		0.0925954	-0.393866	20.6753	0.0483669	0.21968		2.10036e-05	0.000637066	0.219999	0.706489		0.189584	0.0256202	21.3232	0.0468974	0.160837		1.08955e-06	0.000457554	0.161066	0.0510268
						-0.0921385	0.39431	20.6663	0.0483879	0.220317		2.18567e-05	0.000637654	0.220636	0.734504		0	0.190041	21.3235	0.0468967	0.15989		1.09898e-06	0.00045683	0.160119	0.0515501		0.0921385	-0.39431	20.6663	0.0483879	0.220317		2.18567e-05	0.000637654	0.220636	0.734504		0.190041	0.025646	21.3227	0.0468985	0.161295		1.08836e-06	0.000457538	0.161523	0.0509729
						-0.0916817	0.394755	20.657	0.0484097	0.220955		2.1877e-05	0.000638252	0.221274	0.734499		0	0.190498	21.323	0.0468978	0.160347		1.09898e-06	0.00045683	0.160576	0.0515501		0.0916817	-0.394755	20.657	0.0484097	0.220955		2.1877e-05	0.000638252	0.221274	0.734499		0.190498	0.0256714	21.3222	0.0468995	0.161752		1.08325e-06	0.000457523	0.161981	0.0507356
						-0.0912249	0.3952	20.6477	0.0484316	0.221593		2.18976e-05	0.000638857	0.221912	0.734493		0	0.190955	21.3225	0.0468989	0.160804		1.14991e-06	0.00045683	0.161032	0.0539394		0.0912249	-0.3952	20.6477	0.0484316	0.221593		2.18976e-05	0.000638857	0.221912	0.734493		0.190955	0.0256966	21.3217	0.0469006	0.16221		1.1388e-06	0.000457508	0.162438	0.0533388
						-0.090768	0.395647	20.6383	0.0484535	0.222232		2.16566e-05	0.000639469	0.222552	0.725713		0	0.191412	21.3219	0.0469001	0.161261		1.14991e-06	0.00045683	0.161489	0.0539394		0.090768	-0.395647	20.6383	0.0484535	0.222232		2.16566e-05	0.000639469	0.222552	0.725713		0.191412	0.0257215	21.3212	0.0469018	0.162667		1.13875e-06	0.000457491	0.162896	0.0533387
						-0.0903112	0.396094	20.6291	0.0484752	0.222871		2.17429e-05	0.000640301	0.223191	0.727662		0	0.191868	21.3214	0.0469012	0.161718		1.14991e-06	0.00045683	0.161946	0.0539394		0.0903112	-0.396094	20.6291	0.0484752	0.222871		2.17429e-05	0.000640301	0.223191	0.727662		0.191868	0.0257461	21.3206	0.0469029	0.163125		1.13871e-06	0.000457475	0.163353	0.0533386
						-0.0898544	0.396543	20.6199	0.0484969	0.223512		2.48766e-05	0.000641622	0.223832	0.83082		0	0.192325	21.3209	0.0469024	0.162175		1.14991e-06	0.00045683	0.162403	0.0539394		0.0898544	-0.396543	20.6199	0.0484969	0.223512		2.48766e-05	0.000641622	0.223832	0.83082		0.192325	0.0257704	21.3201	0.046904	0.163582		1.13867e-06	0.000457459	0.163811	0.0533384
						-0.0893975	0.396994	20.6093	0.0485218	0.224153		2.42876e-05	0.000642318	0.224474	0.810271		0	0.192782	21.3204	0.0469035	0.162631		1.14991e-06	0.00045683	0.16286	0.0539394		0.0893975	-0.396994	20.6093	0.0485218	0.224153		2.42876e-05	0.000642318	0.224474	0.810271		0.192782	0.0257944	21.3196	0.0469052	0.16404		1.13863e-06	0.000457444	0.164268	0.0533382
						-0.0889407	0.397445	20.599	0.0485461	0.224796		2.31149e-05	0.000611994	0.225102	0.809356		0	0.193239	21.3198	0.0469047	0.163088		1.14991e-06	0.00045683	0.163317	0.0539394		0.0889407	-0.397445	20.599	0.0485461	0.224796		2.31149e-05	0.000611994	0.225102	0.809356		0.193239	0.0258181	21.3191	0.0469063	0.164497		1.13858e-06	0.000457429	0.164726	0.053338
						-0.0884839	0.397852	20.5892	0.0485692	0.225408		2.20796e-05	0.000586703	0.225701	0.806432		0	0.193696	21.3193	0.0469058	0.163545		1.14991e-06	0.00045683	0.163773	0.0539394		0.0884839	-0.397852	20.5892	0.0485692	0.225408		2.20796e-05	0.000586703	0.225701	0.806432		0.193696	0.0258415	21.3186	0.0469075	0.164954		1.13854e-06	0.000457414	0.165183	0.0533378
						-0.0880271	0.398221	20.5798	0.0485913	0.225994		2.11609e-05	0.000565578	0.226277	0.801746		0	0.194153	21.3188	0.046907	0.164002		1.14991e-06	0.00045683	0.16423	0.0539394		0.0880271	-0.398221	20.5798	0.0485913	0.225994		2.11609e-05	0.000565578	0.226277	0.801746		0.194153	0.0258646	21.3181	0.0469086	0.165412		1.1385e-06	0.000457399	0.165641	0.0533376
						-0.0875702	0.398554	20.5709	0.0486124	0.22656		2.13192e-05	0.000547917	0.226834	0.833779		0	0.194609	21.3183	0.0469081	0.164459		1.14991e-06	0.00045683	0.164687	0.0539394		0.0875702	-0.398554	20.5709	0.0486124	0.22656		2.13192e-05	0.000547917	0.226834	0.833779		0.194609	0.0258874	21.3175	0.0469097	0.165869		1.13846e-06	0.000457385	0.166098	0.0533373
						-0.0871134	0.398857	20.5618	0.0486338	0.227108		2.34667e-05	0.000533142	0.227374	0.9432		0	0.195066	21.3178	0.0469093	0.164915		1.14991e-06	0.00045683	0.165144	0.0539394		0.0871134	-0.398857	20.5618	0.0486338	0.227108		2.34667e-05	0.000533142	0.227374	0.9432		0.195066	0.02591	21.317	0.0469109	0.166327		1.13351e-06	0.000457371	0.166555	0.0531069
						-0.0866566	0.399131	20.5519	0.0486572	0.227641		2.26783e-05	0.000520775	0.227901	0.933158		0	0.195523	21.3172	0.0469104	0.165372		1.14991e-06	0.00045683	0.165601	0.0539394		0.0866566	-0.399131	20.5519	0.0486572	0.227641		2.26783e-05	0.000520775	0.227901	0.933158		0.195523	0.0259322	21.3165	0.046912	0.166784		1.13165e-06	0.000457357	0.167013	0.0530217
						-0.0861997	0.399381	20.5424	0.0486799	0.228162		2.19686e-05	0.000510421	0.228417	0.922294		0	0.19598	21.3167	0.0469116	0.165829		1.20399e-06	0.00045683	0.166058	0.0564761		0.0861997	-0.399381	20.5424	0.0486799	0.228162		2.19686e-05	0.000510421	0.228417	0.922294		0.19598	0.0259542	21.316	0.0469131	0.167241		1.19075e-06	0.000457343	0.16747	0.0557922
						-0.0857429	0.399609	20.5331	0.0487019	0.228672		2.09237e-05	0.000501749	0.228923	0.893608		0	0.196437	21.3162	0.0469128	0.166286		1.20399e-06	0.00045683	0.166514	0.0564761		0.0857429	-0.399609	20.5331	0.0487019	0.228672		2.09237e-05	0.000501749	0.228923	0.893608		0.196437	0.0259758	21.3155	0.0469143	0.167699		1.19071e-06	0.000457329	0.167927	0.0557921
						-0.0852861	0.399817	20.5243	0.0487228	0.229174		1.94427e-05	0.00049453	0.229421	0.84248		0	0.196894	21.3156	0.046914	0.166743		1.20399e-06	0.00045683	0.166971	0.0564761		0.0852861	-0.399817	20.5243	0.0487228	0.229174		1.94427e-05	0.00049453	0.229421	0.84248		0.196894	0.0259972	21.3149	0.0469155	0.168156		1.19067e-06	0.000457315	0.168385	0.055792
						-0.0848293	0.400006	20.5161	0.0487422	0.229668		1.89282e-05	0.000488553	0.229913	0.830218		0	0.19735	21.3151	0.0469152	0.1672		1.20399e-06	0.00045683	0.167428	0.0564761		0.0848293	-0.400006	20.5161	0.0487422	0.229668		1.89282e-05	0.000488553	0.229913	0.830218		0.19735	0.0260183	21.3144	0.0469167	0.168613		1.19063e-06	0.000457301	0.168842	0.0557919
						-0.0843724	0.400179	20.5081	0.0487612	0.230157		1.84589e-05	0.000483512	0.230399	0.818079		0	0.197807	21.3145	0.0469164	0.167656		1.20399e-06	0.00045683	0.167885	0.0564761		0.0843724	-0.400179	20.5081	0.0487612	0.230157		1.84589e-05	0.000483512	0.230399	0.818079		0.197807	0.026039	21.3138	0.0469179	0.169071		1.19059e-06	0.000457287	0.169299	0.0557917
						-0.0839156	0.400338	20.5004	0.0487796	0.23064		2.08215e-05	0.000479262	0.23088	0.930966		0	0.198264	21.314	0.0469176	0.168113		1.20399e-06	0.00045683	0.168342	0.0564761		0.0839156	-0.400338	20.5004	0.0487796	0.23064		2.08215e-05	0.000479262	0.23088	0.930966		0.198264	0.0260595	21.3133	0.0469191	0.169528		1.19056e-06	0.000457274	0.169757	0.0557916
						-0.0834588	0.400482	20.4916	0.0488004	0.23112		2.13711e-05	0.00047568	0.231358	0.962735		0	0.198721	21.3134	0.0469188	0.16857		1.20399e-06	0.00045683	0.168799	0.0564761		0.0834588	-0.400482	20.4916	0.0488004	0.23112		2.13711e-05	0.00047568	0.231358	0.962735		0.198721	0.0260796	21.3127	0.0469203	0.169985		1.19052e-06	0.000457261	0.170214	0.0557913
						-0.0830019	0.400615	20.4826	0.0488218	0.231595		2.0942e-05	0.000472663	0.231832	0.949426		0	0.199178	21.3129	0.04692	0.169027		1.20399e-06	0.00045683	0.169255	0.0564761		0.0830019	-0.400615	20.4826	0.0488218	0.231595		2.0942e-05	0.000472663	0.231832	0.949426		0.199178	0.0260995	21.3122	0.0469215	0.170443		1.19048e-06	0.000457248	0.170671	0.0557911
						-0.0825451	0.400736	20.4739	0.0488428	0.232068		2.05494e-05	0.000470123	0.232303	0.936663		0	0.199635	21.3123	0.0469212	0.169484		1.20399e-06	0.00045683	0.169712	0.0564761		0.0825451	-0.400736	20.4739	0.0488428	0.232068		2.05494e-05	0.000470123	0.232303	0.936663		0.199635	0.026119	21.3117	0.0469227	0.1709		1.18892e-06	0.000457235	0.171128	0.0557198
						-0.0820883	0.400847	20.4653	0.0488633	0.232538		2.01901e-05	0.000467985	0.232772	0.92449		0	0.200091	21.3118	0.0469224	0.169941		1.20399e-06	0.00045683	0.170169	0.0564761		0.0820883	-0.400847	20.4653	0.0488633	0.232538		2.01901e-05	0.000467985	0.232772	0.92449		0.200091	0.0261383	21.3111	0.0469238	0.171357		1.18311e-06	0.000457223	0.171586	0.0554487
						-0.0816314	0.400949	20.4568	0.0488835	0.233006		1.98612e-05	0.000466187	0.233239	0.912935		0	0.200548	21.3112	0.0469236	0.170397		1.20399e-06	0.00045683	0.170626	0.0564761		0.0816314	-0.400949	20.4568	0.0488835	0.233006		1.98612e-05	0.000466187	0.233239	0.912935		0.200548	0.0261572	21.3106	0.046925	0.171814		1.18308e-06	0.000457211	0.172043	0.0554486
						-0.0811746	0.401042	20.4485	0.0489034	0.233472		1.95598e-05	0.000464674	0.233705	0.902011		0	0.201005	21.3107	0.0469248	0.170854		1.26155e-06	0.00045683	0.171083	0.059176		0.0811746	-0.401042	20.4485	0.0489034	0.233472		1.95598e-05	0.000464674	0.233705	0.902011		0.201005	0.0261759	21.3101	0.0469262	0.172271		1.2461e-06	0.000457199	0.1725	0.0584041
						-0.0807178	0.401127	20.4403	0.0489229	0.233937		1.8752e-05	0.000463402	0.234169	0.867132		0	0.201462	21.3101	0.0469261	0.171311		1.26155e-06	0.00045683	0.17154	0.059176		0.0807178	-0.401127	20.4403	0.0489229	0.233937		1.8752e-05	0.000463402	0.234169	0.867132		0.201462	0.0261943	21.3095	0.0469275	0.172729		1.24607e-06	0.000457187	0.172957	0.058404
						-0.080261	0.401205	20.4325	0.0489417	0.2344		1.731e-05	0.000462339	0.234632	0.802291		0	0.201919	21.3095	0.0469273	0.171768		1.26155e-06	0.00045683	0.171996	0.059176		0.080261	-0.401205	20.4325	0.0489417	0.2344		1.731e-05	0.000462339	0.234632	0.802291		0.201919	0.0262124	21.3089	0.0469287	0.173186		1.24603e-06	0.000457175	0.173414	0.0584039
						-0.0798041	0.401276	20.4253	0.048959	0.234863		1.99713e-05	0.000461455	0.235093	0.927411		0	0.202376	21.309	0.0469286	0.172225		1.26155e-06	0.00045683	0.172453	0.059176		0.0798041	-0.401276	20.4253	0.048959	0.234863		1.99713e-05	0.000461455	0.235093	0.927412		0.202376	0.0262301	21.3084	0.04693	0.173643		1.246e-06	0.000457163	0.173872	0.0584038
						-0.0793473	0.401341	20.4169	0.048979	0.235324		2.07414e-05	0.000460709	0.235555	0.964733		0	0.202832	21.3084	0.0469298	0.172682		1.26155e-06	0.00045683	0.17291	0.059176		0.0793473	-0.401341	20.4169	0.048979	0.235324		2.07414e-05	0.000460709	0.235555	0.964733		0.202832	0.0262476	21.3078	0.0469312	0.1741		1.24596e-06	0.000457151	0.174329	0.0584037
						-0.0788905	0.401401	20.4083	0.0489997	0.235785		2.05104e-05	0.00046008	0.236015	0.955291		0	0.203289	21.3078	0.0469311	0.173138		1.26155e-06	0.00045683	0.173367	0.059176		0.0788905	-0.401401	20.4083	0.0489997	0.235785		2.05104e-05	0.00046008	0.236015	0.955291		0.203289	0.0262647	21.3072	0.0469324	0.174557		1.24593e-06	0.00045714	0.174786	0.0584035
						-0.0784336	0.401455	20.3998	0.0490202	0.236245		2.0298e-05	0.00045955	0.236475	0.946487		0	0.203746	21.3073	0.0469324	0.173595		1.26155e-06	0.00045683	0.173824	0.059176		0.0784336	-0.401455	20.3998	0.0490202	0.236245		2.0298e-05	0.00045955	0.236475	0.946487		0.203746	0.0262816	21.3067	0.0469337	0.175014		1.24589e-06	0.000457129	0.175243	0.0584033
						-0.0779768	0.401505	20.3913	0.0490405	0.236705		2.01027e-05	0.000459105	0.236934	0.938292		0	0.204203	21.3067	0.0469336	0.174052		1.26155e-06	0.00045683	0.17428	0.059176		0.0779768	-0.401505	20.3913	0.0490405	0.236705		2.01027e-05	0.000459105	0.236934	0.938292		0.204203	0.0262981	21.3061	0.0469349	0.175472		1.24586e-06	0.000457118	0.1757	0.0584031
						-0.07752	0.401551	20.383	0.0490606	0.237164		1.99233e-05	0.00045873	0.237393	0.930679		0	0.20466	21.3061	0.0469349	0.174509		1.26155e-06	0.00045683	0.174737	0.059176		0.07752	-0.401551	20.383	0.0490606	0.237164		1.99233e-05	0.00045873	0.237393	0.930679		0.20466	0.0263144	21.3055	0.0469362	0.175929		1.24095e-06	0.000457108	0.176157	0.0581743
						-0.0770631	0.401593	20.3747	0.0490805	0.237622		1.97586e-05	0.000458415	0.237852	0.923617		0	0.205116	21.3055	0.0469362	0.174966		1.26155e-06	0.00045683	0.175194	0.059176		0.0770631	-0.401593	20.3747	0.0490805	0.237622		1.97586e-05	0.000458415	0.237852	0.923617		0.205116	0.0263303	21.305	0.0469374	0.176386		1.23788e-06	0.000457097	0.176614	0.0580315
						-0.0766063	0.401631	20.3665	0.0491003	0.238081		1.96074e-05	0.000458152	0.23831	0.917076		0	0.205573	21.305	0.0469374	0.175423		1.26155e-06	0.00045683	0.175651	0.059176		0.0766063	-0.401631	20.3665	0.0491003	0.238081		1.96074e-05	0.000458152	0.23831	0.917076		0.205573	0.0263459	21.3044	0.0469387	0.176843		1.23785e-06	0.000457087	0.177071	0.0580315
						-0.0761495	0.401665	20.3583	0.0491199	0.238539		1.94686e-05	0.00045793	0.238768	0.911026		0	0.20603	21.3044	0.0469387	0.175879		1.32297e-06	0.00045683	0.176108	0.0620568		0.0761495	-0.401665	20.3583	0.0491199	0.238539		1.94686e-05	0.00045793	0.238768	0.911026		0.20603	0.0263613	21.3038	0.0469399	0.1773		1.30523e-06	0.000457078	0.177529	0.0611915
						-0.0756927	0.401697	20.3503	0.0491394	0.238997		1.86888e-05	0.000457745	0.239226	0.874886		0	0.206487	21.3038	0.04694	0.176336		1.32297e-06	0.00045683	0.176565	0.0620568		0.0756927	-0.401697	20.3503	0.0491394	0.238997		1.86888e-05	0.000457745	0.239226	0.874886		0.206487	0.0263764	21.3032	0.0469412	0.177757		1.3052e-06	0.000457067	0.177986	0.0611915
						-0.0752358	0.401726	20.3425	0.0491581	0.239455		2.00997e-05	0.000457591	0.239683	0.941253		0	0.206944	21.3032	0.0469413	0.176793		1.32297e-06	0.00045683	0.177021	0.0620568		0.0752358	-0.401726	20.3425	0.0491581	0.239455		2.00997e-05	0.000457591	0.239683	0.941253		0.206944	0.0263911	21.3027	0.0469425	0.178214		1.30517e-06	0.000457057	0.178443	0.0611914
						-0.074779	0.401753	20.3342	0.0491782	0.239912		2.12275e-05	0.000457463	0.240141	0.994346		0	0.207401	21.3026	0.0469426	0.17725		1.32297e-06	0.00045683	0.177478	0.0620568		0.074779	-0.401753	20.3342	0.0491782	0.239912		2.12275e-05	0.000457463	0.240141	0.994346		0.207401	0.0264055	21.3021	0.0469438	0.178671		1.30514e-06	0.000457048	0.1789	0.0611913
						-0.0743222	0.401777	20.3255	0.0491994	0.24037		2.11112e-05	0.000457355	0.240598	0.989133		0	0.207857	21.302	0.046944	0.177707		1.32297e-06	0.00045683	0.177935	0.0620568		0.0743222	-0.401777	20.3255	0.0491994	0.24037		2.11112e-05	0.000457355	0.240598	0.989133		0.207857	0.0264196	21.3015	0.0469451	0.179128		1.30511e-06	0.000457038	0.179357	0.0611912
						-0.0738653	0.401798	20.3167	0.0492205	0.240827		2.10046e-05	0.000457265	0.241056	0.984334		0	0.208314	21.3014	0.0469453	0.178164		1.32297e-06	0.00045683	0.178392	0.0620568		0.0738653	-0.401798	20.3167	0.0492205	0.240827		2.10046e-05	0.000457265	0.241056	0.984334		0.208314	0.0264334	21.3009	0.0469464	0.179585		1.30508e-06	0.000457029	0.179814	0.061191
						-0.0734085	0.401818	20.3081	0.0492415	0.241284		2.0907e-05	0.00045719	0.241513	0.97992		0	0.208771	21.3008	0.0469466	0.17862		1.32297e-06	0.00045683	0.178849	0.0620568		0.0734085	-0.401818	20.3081	0.0492415	0.241284		2.0907e-05	0.00045719	0.241513	0.97992		0.208771	0.0264469	21.3003	0.0469477	0.180042		1.30505e-06	0.00045702	0.180271	0.0611908
						-0.0729517	0.401837	20.2995	0.0492624	0.241742		2.08177e-05	0.000457128	0.24197	0.975866		0	0.209228	21.3002	0.0469479	0.179077		1.32297e-06	0.00045683	0.179306	0.0620568		0.0729517	-0.401837	20.2995	0.0492624	0.241742		2.08177e-05	0.000457128	0.24197	0.975866		0.209228	0.0264601	21.2997	0.046949	0.180499		1.30502e-06	0.000457011	0.180728	0.0611906
						-0.0724949	0.401853	20.2909	0.0492832	0.242199		2.0736e-05	0.000457076	0.242427	0.972146		0	0.209685	21.2996	0.0469493	0.179534		1.32297e-06	0.00045683	0.179762	0.0620568		0.0724949	-0.401853	20.2909	0.0492832	0.242199		2.0736e-05	0.000457076	0.242427	0.972146		0.209685	0.026473	21.2991	0.0469503	0.180956		1.29681e-06	0.000457003	0.181185	0.0608069
						-0.072038	0.401868	20.2823	0.049304	0.242656		2.06613e-05	0.000457033	0.242884	0.968735		0	0.210142	21.299	0.0469506	0.179991		1.32297e-06	0.00045683	0.180219	0.0620568		0.072038	-0.401868	20.2823	0.049304	0.242656		2.06613e-05	0.000457033	0.242884	0.968735		0.210142	0.0264856	21.2985	0.0469516	0.181413		1.29636e-06	0.000456995	0.181642	0.060787
						-0.0715812	0.401882	20.2739	0.0493246	0.243113		2.05931e-05	0.000456997	0.243341	0.965612		0	0.210598	21.2984	0.0469519	0.180448		1.32297e-06	0.00045683	0.180676	0.0620568		0.0715812	-0.401882	20.2739	0.0493246	0.243113		2.05931e-05	0.000456997	0.243341	0.965612		0.210598	0.0264979	21.2979	0.0469529	0.18187		1.29634e-06	0.000456987	0.182099	0.060787
						-0.0711244	0.401894	20.2654	0.0493452	0.24357		2.05308e-05	0.000456968	0.243798	0.962753		0	0.211055	21.2978	0.0469532	0.180905		1.38866e-06	0.00045683	0.181133	0.0651385		0.0711244	-0.401894	20.2654	0.0493452	0.24357		2.05308e-05	0.000456968	0.243798	0.962753		0.211055	0.0265098	21.2973	0.0469542	0.182327		1.36854e-06	0.000456979	0.182556	0.0641737
						-0.0706675	0.401905	20.257	0.0493657	0.244027		2.02277e-05	0.000456943	0.244255	0.94859		0	0.211512	21.2972	0.0469546	0.181361		1.38866e-06	0.00045683	0.18159	0.0651385		0.0706675	-0.401905	20.257	0.0493657	0.244027		2.02277e-05	0.000456943	0.244255	0.94859		0.211512	0.0265215	21.2967	0.0469556	0.182784		1.36852e-06	0.000456971	0.183013	0.0641737
						-0.0702107	0.401916	20.2487	0.049386	0.244484		2.29648e-05	0.000456923	0.244712	1.077		0	0.211969	21.2965	0.046956	0.181818		1.38866e-06	0.00045683	0.182047	0.0651385		0.0702107	-0.401916	20.2487	0.049386	0.244484		2.29648e-05	0.000456923	0.244712	1.077		0.211969	0.0265329	21.2961	0.046957	0.183241		1.36849e-06	0.000456963	0.18347	0.0641736
						-0.0697539	0.401925	20.2393	0.0494089	0.244941		2.29076e-05	0.000456906	0.245169	1.07436		0	0.212426	21.2959	0.0469574	0.182275		1.38866e-06	0.00045683	0.182503	0.0651385		0.0697539	-0.401925	20.2393	0.0494089	0.244941		2.29076e-05	0.000456906	0.245169	1.07436		0.212426	0.026544	21.2955	0.0469583	0.183698		1.36847e-06	0.000456956	0.183927	0.0641735
						-0.069297	0.401933	20.2299	0.0494318	0.245397		2.28557e-05	0.000456892	0.245626	1.07196		0	0.212883	21.2953	0.0469588	0.182732		1.38866e-06	0.00045683	0.18296	0.0651385		0.069297	-0.401933	20.2299	0.0494318	0.245397		2.28557e-05	0.000456892	0.245626	1.07196		0.212883	0.0265547	21.2949	0.0469597	0.184155		1.36844e-06	0.000456949	0.184384	0.0641734
						-0.0688402	0.401941	20.2205	0.0494547	0.245854		2.28086e-05	0.000456881	0.246083	1.06977		0	0.213339	21.2946	0.0469602	0.183189		1.38866e-06	0.00045683	0.183417	0.0651385		0.0688402	-0.401941	20.2205	0.0494547	0.245854		2.28086e-05	0.000456881	0.246083	1.06977		0.213339	0.0265651	21.2942	0.0469611	0.184612		1.36842e-06	0.000456942	0.184841	0.0641732
						-0.0683834	0.401948	20.2112	0.0494775	0.246311		2.27659e-05	0.000456871	0.24654	1.06779		0	0.213796	21.294	0.0469616	0.183646		1.38866e-06	0.00045683	0.183874	0.0651385		0.0683834	-0.401948	20.2112	0.0494775	0.246311		2.27659e-05	0.000456871	0.24654	1.06779		0.213796	0.0265752	21.2936	0.0469624	0.185069		1.3684e-06	0.000456935	0.185298	0.064173
						-0.0679266	0.401954	20.2019	0.0495003	0.246768		2.27272e-05	0.000456864	0.246997	1.06599		0	0.214253	21.2934	0.046963	0.184102		1.38866e-06	0.00045683	0.184331	0.0651385		0.0679266	-0.401954	20.2019	0.0495003	0.246768		2.27272e-05	0.000456864	0.246997	1.06599		0.214253	0.0265851	21.293	0.0469638	0.185526		1.3664e-06	0.000456928	0.185754	0.0640802
						-0.0674697	0.401959	20.1926	0.049523	0.247225		2.26921e-05	0.000456857	0.247453	1.06436		0	0.21471	21.2927	0.0469643	0.184559		1.38866e-06	0.00045683	0.184788	0.0651385		0.0674697	-0.401959	20.1926	0.049523	0.247225		2.26921e-05	0.000456857	0.247453	1.06436		0.21471	0.0265946	21.2924	0.0469652	0.185983		1.359e-06	0.000456922	0.186211	0.063734
						-0.0670129	0.401964	20.1834	0.0495457	0.247682		2.26603e-05	0.000456852	0.24791	1.06288		0	0.215167	21.2921	0.0469657	0.185016		1.38866e-06	0.00045683	0.185244	0.0651385		0.0670129	-0.401964	20.1834	0.0495457	0.247682		2.26603e-05	0.000456852	0.24791	1.06288		0.215167	0.0266038	21.2918	0.0469665	0.18644		1.35898e-06	0.000456916	0.186668	0.063734
						-0.0665561	0.401969	20.1742	0.0495684	0.248139		2.26316e-05	0.000456848	0.248367	1.06154		0	0.215624	21.2915	0.0469671	0.185473		1.38866e-06	0.00045683	0.185701	0.0651385		0.0665561	-0.401969	20.1742	0.0495684	0.248139		2.26316e-05	0.000456848	0.248367	1.06154		0.215624	0.0266127	21.2911	0.0469679	0.186897		1.35896e-06	0.000456911	0.187125	0.063734
						-0.0660992	0.401973	20.165	0.049591	0.248596		2.26055e-05	0.000456845	0.248824	1.06033		0	0.21608	21.2909	0.0469685	0.18593		1.45911e-06	0.00045683	0.186158	0.0684432		0.0660992	-0.401973	20.165	0.049591	0.248596		2.26055e-05	0.000456845	0.248824	1.06033		0.21608	0.0266213	21.2905	0.0469693	0.187354		1.43651e-06	0.000456905	0.187582	0.0673719
						-0.0656424	0.401977	20.1558	0.0496136	0.249052		2.33705e-05	0.000456842	0.249281	1.09622		0	0.216537	21.2902	0.04697	0.186386		1.45911e-06	0.00045683	0.186615	0.0684432		0.0656424	-0.401977	20.1558	0.0496136	0.249052		2.33705e-05	0.000456842	0.249281	1.09622		0.216537	0.0266296	21.2899	0.0469707	0.187811		1.43649e-06	0.000456899	0.188039	0.0673719
						-0.0651856	0.40198	20.1463	0.049637	0.249509		2.65739e-05	0.00045684	0.249738	1.24649		0	0.216994	21.2895	0.0469714	0.186843		1.45911e-06	0.00045683	0.187072	0.0684432		0.0651856	-0.40198	20.1463	0.049637	0.249509		2.65739e-05	0.00045684	0.249738	1.24649		0.216994	0.0266375	21.2892	0.0469721	0.188267		1.43648e-06	0.000456894	0.188496	0.0673718
						-0.0647288	0.401983	20.1355	0.0496635	0.249966		2.65497e-05	0.000456838	0.250194	1.24536		0	0.217451	21.2889	0.0469729	0.1873		1.45911e-06	0.00045683	0.187529	0.0684432		0.0647288	-0.401983	20.1355	0.0496635	0.249966		2.65497e-05	0.000456838	0.250194	1.24536		0.217451	0.0266452	21.2886	0.0469736	0.188724		1.43646e-06	0.000456889	0.188953	0.0673717
						-0.0642719	0.401986	20.1247	0.0496901	0.250423		2.6528e-05	0.000456836	0.250651	1.24434		0	0.217908	21.2882	0.0469743	0.187757		1.45911e-06	0.00045683	0.187985	0.0684432		0.0642719	-0.401986	20.1247	0.0496901	0.250423		2.6528e-05	0.000456836	0.250651	1.24434		0.217908	0.0266526	21.2879	0.046975	0.189181		1.43644e-06	0.000456884	0.18941	0.0673716
						-0.0638151	0.401988	20.114	0.0497166	0.25088		2.65085e-05	0.000456835	0.251108	1.24343		0	0.218365	21.2876	0.0469758	0.188214		1.45911e-06	0.00045683	0.188442	0.0684432		0.0638151	-0.401988	20.114	0.0497166	0.25088		2.65085e-05	0.000456835	0.251108	1.24343		0.218365	0.0266596	21.2873	0.0469764	0.189638		1.43642e-06	0.000456879	0.189867	0.0673715
						-0.0633583	0.40199	20.1033	0.0497431	0.251337		2.6491e-05	0.000456834	0.251565	1.24261		0	0.218821	21.2869	0.0469773	0.188671		1.45911e-06	0.00045683	0.188899	0.0684432		0.0633583	-0.40199	20.1033	0.0497431	0.251337		2.6491e-05	0.000456834	0.251565	1.24261		0.218821	0.0266663	21.2866	0.0469779	0.190095		1.4364e-06	0.000456875	0.190323	0.0673713
						-0.0629014	0.401992	20.0926	0.0497696	0.251793		2.64753e-05	0.000456833	0.252022	1.24188		0	0.219278	21.2862	0.0469787	0.189127		1.45911e-06	0.00045683	0.189356	0.0684432		0.0629014	-0.401992	20.0926	0.0497696	0.251793		2.64753e-05	0.000456833	0.252022	1.24188		0.219278	0.0266727	21.286	0.0469793	0.190552		1.43237e-06	0.00045687	0.19078	0.0671825
						-0.0624446	0.401994	20.0819	0.0497961	0.25225		2.64611e-05	0.000456832	0.252479	1.24121		0	0.219735	21.2856	0.0469802	0.189584		1.45911e-06	0.00045683	0.189813	0.0684432		0.0624446	-0.401994	20.0819	0.0497961	0.25225		2.64611e-05	0.000456832	0.252479	1.24121		0.219735	0.0266788	21.2853	0.0469807	0.191009		1.42619e-06	0.000456866	0.191237	0.0668934
						-0.0619878	0.401996	20.0712	0.0498225	0.252707		2.64484e-05	0.000456832	0.252935	1.24062		0	0.220192	21.2849	0.0469816	0.190041		1.45911e-06	0.00045683	0.19027	0.0684432		0.0619878	-0.401996	20.0712	0.0498225	0.252707		2.64484e-05	0.000456832	0.252935	1.24062		0.220192	0.0266846	21.2847	0.0469822	0.191466		1.42618e-06	0.000456863	0.191694	0.0668934
						-0.0615309	0.401997	20.0606	0.049849	0.253164		2.6437e-05	0.000456831	0.253392	1.24009		0	0.220649	21.2842	0.0469831	0.190498		1.45911e-06	0.00045683	0.190726	0.0684432		0.0615309	-0.401997	20.0606	0.049849	0.253164		2.6437e-05	0.000456831	0.253392	1.24009		0.220649	0.0266901	21.284	0.0469836	0.191923		1.42617e-06	0.000456859	0.192151	0.0668934
						-0.0610741	0.401998	20.05	0.0498754	0.253621		2.64268e-05	0.000456831	0.253849	1.23961		0	0.221106	21.2836	0.0469846	0.190955		1.53485e-06	0.00045683	0.191183	0.0719958		0.0610741	-0.401998	20.05	0.0498754	0.253621		2.64268e-05	0.000456831	0.253849	1.23961		0.221106	0.0266954	21.2834	0.046985	0.192379		1.50966e-06	0.000456856	0.192608	0.0708101
						-0.0606173	0.402	20.0393	0.0499019	0.254078		2.82608e-05	0.000456831	0.254306	1.32564		0	0.221562	21.2829	0.0469861	0.191412		1.53485e-06	0.00045683	0.19164	0.0719958		0.0606173	-0.402	20.0393	0.0499019	0.254078		2.82608e-05	0.000456831	0.254306	1.32564		0.221562	0.0267003	21.2827	0.0469865	0.192836		1.50965e-06	0.000456853	0.193065	0.0708101
						-0.0601605	0.402001	20.028	0.0499301	0.254534		3.31171e-05	0.000456831	0.254763	1.55343		0	0.222019	21.2822	0.0469876	0.191868		1.53485e-06	0.00045683	0.192097	0.0719958		0.0601605	-0.402001	20.028	0.0499301	0.254534		3.31171e-05	0.000456831	0.254763	1.55343		0.222019	0.0267048	21.282	0.046988	0.193293		1.50964e-06	0.00045685	0.193522	0.07081
						-0.0597036	0.402002	20.0147	0.0499632	0.254991		3.31077e-05	0.00045683	0.25522	1.55299		0	0.222476	21.2815	0.0469892	0.192325		1.53485e-06	0.00045683	0.192554	0.0719958		0.0597036	-0.402002	20.0147	0.0499632	0.254991		3.31077e-05	0.00045683	0.25522	1.55299		0.222476	0.0267091	21.2813	0.0469895	0.19375		1.50963e-06	0.000456847	0.193978	0.07081
						-0.0592468	0.402002	20.0015	0.0499963	0.255448		3.30992e-05	0.00045683	0.255676	1.55259		0	0.222933	21.2808	0.0469907	0.192782		1.53485e-06	0.00045683	0.193011	0.0719958		0.0592468	-0.402002	20.0015	0.0499963	0.255448		3.30992e-05	0.00045683	0.255676	1.55259		0.222933	0.0267131	21.2806	0.0469911	0.194207		1.50962e-06	0.000456844	0.194435	0.0708098
						-0.05879	0.402003	19.9882	0.0500294	0.255905		3.30915e-05	0.00045683	0.256133	1.55223		0	0.22339	21.2801	0.0469922	0.193239		1.53485e-06	0.00045683	0.193467	0.0719958		0.05879	-0.402003	19.9882	0.0500294	0.255905		3.30915e-05	0.00045683	0.256133	1.55223		0.22339	0.0267167	21.28	0.0469926	0.194664		1.5096e-06	0.000456842	0.194892	0.0708097
						-0.0583331	0.402004	19.975	0.0500625	0.256362		3.30845e-05	0.00045683	0.25659	1.55191		0	0.223847	21.2794	0.0469938	0.193696		1.53485e-06	0.00045683	0.193924	0.0719958		0.0583331	-0.402004	19.975	0.0500625	0.256362		3.30845e-05	0.00045683	0.25659	1.55191		0.223847	0.02672	21.2793	0.0469941	0.19512		1.50959e-06	0.00045684	0.195349	0.0708095
						-0.0578763	0.402004	19.9618	0.0500956	0.256819		3.30782e-05	0.00045683	0.257047	1.55161		0	0.224303	21.2787	0.0469953	0.194153		1.53485e-06	0.00045683	0.194381	0.0719958		0.0578763	-0.402004	19.9618	0.0500956	0.256819		3.30782e-05	0.00045683	0.257047	1.55161		0.224303	0.0267231	21.2786	0.0469956	0.195577		1.50403e-06	0.000456838	0.195806	0.0705491
						-0.0574195	0.402005	19.9487	0.0501287	0.257275		3.30725e-05	0.00045683	0.257504	1.55134		0	0.22476	21.278	0.0469968	0.194609		1.53485e-06	0.00045683	0.194838	0.0719958		0.0574195	-0.402005	19.9487	0.0501287	0.257275		3.30725e-05	0.00045683	0.257504	1.55134		0.22476	0.0267258	21.2779	0.0469971	0.196034		1.49848e-06	0.000456836	0.196263	0.0702887
						-0.0569626	0.402006	19.9355	0.0501618	0.257732		3.30674e-05	0.00045683	0.257961	1.5511		0	0.225217	21.2773	0.0469984	0.195066		1.53485e-06	0.00045683	0.195295	0.0719958		0.0569626	-0.402006	19.9355	0.0501618	0.257732		3.30674e-05	0.00045683	0.257961	1.5511		0.225217	0.0267282	21.2772	0.0469986	0.196491		1.49847e-06	0.000456834	0.196719	0.0702887
						-0.0565058	0.402006	19.9224	0.0501948	0.258189		3.30627e-05	0.00045683	0.258417	1.55088		0	0.225674	21.2766	0.0469999	0.195523		1.53485e-06	0.00045683	0.195751	0.0719958		0.0565058	-0.402006	19.9224	0.0501948	0.258189		3.30627e-05	0.00045683	0.258417	1.55088		0.225674	0.0267303	21.2766	0.0470001	0.196948		1.49847e-06	0.000456833	0.197176	0.0702888
						-0.056049	0.402006	19.9093	0.0502279	0.258646		3.30585e-05	0.00045683	0.258874	1.55069		0	0.226131	21.2759	0.0470014	0.19598		1.61647e-06	0.00045683	0.196208	0.0758244		0.056049	-0.402006	19.9093	0.0502279	0.258646		3.30585e-05	0.00045683	0.258874	1.55069		0.226131	0.0267321	21.2759	0.0470016	0.197405		1.58857e-06	0.000456832	0.197633	0.0745153
						-0.0555922	0.402007	19.8962	0.050261	0.259103		3.50976e-05	0.00045683	0.259331	1.64634		0	0.226587	21.2752	0.0470031	0.196437		1.61647e-06	0.00045683	0.196665	0.0758244		0.0555922	-0.402007	19.8962	0.050261	0.259103		3.50976e-05	0.00045683	0.259331	1.64634		0.226587	0.0267336	21.2752	0.0470032	0.197861		1.58857e-06	0.000456831	0.19809	0.0745153
						-0.0551353	0.402007	19.8823	0.0502961	0.25956		4.00007e-05	0.00045683	0.259788	1.87633		0	0.227044	21.2745	0.0470047	0.196894		1.61647e-06	0.00045683	0.197122	0.0758244		0.0551353	-0.402007	19.8823	0.0502961	0.25956		4.00007e-05	0.00045683	0.259788	1.87633		0.227044	0.0267348	21.2744	0.0470048	0.198318		1.58856e-06	0.00045683	0.198547	0.0745152
						-0.0546785	0.402007	19.8665	0.0503361	0.260016		3.99972e-05	0.00045683	0.260245	1.87616		0	0.227501	21.2737	0.0470063	0.19735		1.61647e-06	0.00045683	0.197579	0.0758244		0.0546785	-0.402007	19.8665	0.0503361	0.260016		3.99972e-05	0.00045683	0.260245	1.87616		0.227501	0.0267357	21.2737	0.0470064	0.198775		1.58856e-06	0.00045683	0.199004	0.0745151
						-0.0542217	0.402008	19.8507	0.0503761	0.260473		3.99939e-05	0.00045683	0.260702	1.87601		0	0.227958	21.273	0.0470079	0.197807		1.61647e-06	0.00045683	0.198036	0.0758244		0.0542217	-0.402008	19.8507	0.0503761	0.260473		3.99939e-05	0.00045683	0.260702	1.87601		0.227958	0.0267363	21.273	0.0470079	0.199232		1.58856e-06	0.00045683	0.19946	0.074515
						-0.0537648	0.402008	19.835	0.050416	0.26093		3.99907e-05	0.00045683	0.261158	1.87586		0	0.228415	21.2723	0.0470095	0.198264		1.61647e-06	0.00045683	0.198492	0.0758244		0.0537648	-0.402008	19.835	0.050416	0.26093		3.99907e-05	0.00045683	0.261158	1.87586		0.228415	0.0267365	21.2723	0.0470095	0.199689		1.58855e-06	0.00045683	0.199917	0.0745148
						-0.053308	0.402008	19.8192	0.050456	0.261387		3.99879e-05	0.00045683	0.261615	1.87572		0	0.228872	21.2716	0.0470111	0.198721		1.61647e-06	0.00045683	0.198949	0.0758244		0.053308	-0.402008	19.8192	0.050456	0.261387		3.99879e-05	0.00045683	0.261615	1.87572		0.228872	0.0267365	21.2716	0.0470111	0.200146		1.58855e-06	0.00045683	0.200374	0.0745146
						-0.0528512	0.402008	19.8035	0.050496	0.261844		3.99852e-05	0.00045683	0.262072	1.8756		0	0.229328	21.2708	0.0470128	0.199178		1.61647e-06	0.00045683	0.199406	0.0758244		0.0528512	-0.402008	19.8035	0.050496	0.261844		3.99852e-05	0.00045683	0.262072	1.8756		0.229328	0.0267361	21.2708	0.0470127	0.200602		1.58219e-06	0.00045683	0.200831	0.0742163
						-0.0523944	0.402009	19.7879	0.050536	0.262301		3.99827e-05	0.00045683	0.262529	1.87548		0	0.229785	21.2701	0.0470144	0.199635		1.61647e-06	0.00045683	0.199863	0.0758244		0.0523944	-0.402009	19.7879	0.050536	0.262301		3.99827e-05	0.00045683	0.262529	1.87548		0.229785	0.0267354	21.2701	0.0470143	0.201059		1.57643e-06	0.000456831	0.201288	0.0739462
						-0.0519375	0.402009	19.7722	0.050576	0.262757		3.99804e-05	0.00045683	0.262986	1.87537		0	0.230242	21.2694	0.047016	0.200091		1.61647e-06	0.00045683	0.20032	0.0758244		0.0519375	-0.402009	19.7722	0.050576	0.262757		3.99804e-05	0.00045683	0.262986	1.87537		0.230242	0.0267345	21.2694	0.0470159	0.201516		1.57644e-06	0.000456831	0.201745	0.0739463
						-0.0514807	0.402009	19.7566	0.050616	0.263214		3.99783e-05	0.00045683	0.263443	1.87527		0	0.230699	21.2686	0.0470176	0.200548		1.61647e-06	0.00045683	0.200777	0.0758244		0.0514807	-0.402009	19.7566	0.050616	0.263214		3.99783e-05	0.00045683	0.263443	1.87527		0.230699	0.0267332	21.2687	0.0470174	0.201973		1.57644e-06	0.000456832	0.202201	0.0739463
						-0.0510239	0.402009	19.741	0.050656	0.263671		3.99763e-05	0.00045683	0.263899	1.87518		0	0.231156	21.2679	0.0470192	0.201005		1.70465e-06	0.00045683	0.201233	0.0799608		0.0510239	-0.402009	19.741	0.050656	0.263671		3.99763e-05	0.00045683	0.263899	1.87518		0.231156	0.0267316	21.268	0.047019	0.20243		1.6739e-06	0.000456833	0.202658	0.0785177
						-0.050567	0.402009	19.7254	0.0506959	0.264128		3.95514e-05	0.00045683	0.264356	1.85525		0	0.231613	21.2671	0.0470209	0.201462		1.70465e-06	0.00045683	0.20169	0.0799608		0.050567	-0.402009	19.7254	0.0506959	0.264128		3.95514e-05	0.00045683	0.264356	1.85525		0.231613	0.0267298	21.2672	0.0470207	0.202887		1.67391e-06	0.000456835	0.203115	0.0785177
						-0.0501102	0.402009	19.7101	0.0507355	0.264585		3.86772e-05	0.00045683	0.264813	1.81424		0	0.232069	21.2664	0.0470226	0.201919		1.70465e-06	0.00045683	0.202147	0.0799608		0.0501102	-0.402009	19.7101	0.0507355	0.264585		3.86772e-05	0.00045683	0.264813	1.81424		0.232069	0.0267276	21.2665	0.0470224	0.203343		1.67391e-06	0.000456836	0.203572	0.0785176
						-0.0496534	0.402009	19.6951	0.0507742	0.265041		3.86748e-05	0.00045683	0.26527	1.81413		0	0.232526	21.2656	0.0470243	0.202376		1.70465e-06	0.00045683	0.202604	0.0799608		0.0496534	-0.402009	19.6951	0.0507742	0.265041		3.86748e-05	0.00045683	0.26527	1.81413		0.232526	0.0267251	21.2657	0.047024	0.2038		1.67392e-06	0.000456838	0.204029	0.0785175
						-0.0491965	0.402009	19.6801	0.0508128	0.265498		3.86728e-05	0.00045683	0.265727	1.81404		0	0.232983	21.2648	0.047026	0.202832		1.70465e-06	0.00045683	0.203061	0.0799608		0.0491965	-0.402009	19.6801	0.0508128	0.265498		3.86728e-05	0.00045683	0.265727	1.81404		0.232983	0.0267223	21.265	0.0470257	0.204257		1.67392e-06	0.00045684	0.204486	0.0785174
						-0.0487397	0.402009	19.6651	0.0508515	0.265955		3.86712e-05	0.00045683	0.266184	1.81396		0	0.23344	21.264	0.0470277	0.203289		1.70465e-06	0.00045683	0.203518	0.0799608		0.0487397	-0.402009	19.6651	0.0508515	0.265955		3.86712e-05	0.00045683	0.266184	1.81396		0.23344	0.0267192	21.2642	0.0470274	0.204714		1.67393e-06	0.000456842	0.204942	0.0785172
						-0.0482829	0.40201	19.6502	0.0508902	0.266412		3.86699e-05	0.00045683	0.26664	1.8139		0	0.233897	21.2633	0.0470295	0.203746		1.70465e-06	0.00045683	0.203974	0.0799608		0.0482829	-0.40201	19.6502	0.0508902	0.266412		3.86699e-05	0.00045683	0.26664	1.8139		0.233897	0.0267158	21.2634	0.0470291	0.205171		1.67393e-06	0.000456845	0.205399	0.0785171
						-0.0478261	0.40201	19.6352	0.0509288	0.266869		3.86688e-05	0.00045683	0.267097	1.81385		0	0.234354	21.2625	0.0470312	0.204203		1.70465e-06	0.00045683	0.204431	0.0799608		0.0478261	-0.40201	19.6352	0.0509288	0.266869		3.86688e-05	0.00045683	0.267097	1.81385		0.234354	0.0267121	21.2627	0.0470307	0.205628		1.66774e-06	0.000456847	0.205856	0.078226
						-0.0473692	0.40201	19.6203	0.0509675	0.267326		3.86679e-05	0.00045683	0.267554	1.81381		0	0.23481	21.2617	0.0470329	0.20466		1.70465e-06	0.00045683	0.204888	0.0799608		0.0473692	-0.40201	19.6203	0.0509675	0.267326		3.86679e-05	0.00045683	0.267554	1.81381		0.23481	0.026708	21.2619	0.0470324	0.206084		1.6607e-06	0.00045685	0.206313	0.0778957
						-0.0469124	0.40201	19.6055	0.0510062	0.267782		3.86671e-05	0.00045683	0.268011	1.81377		0	0.235267	21.261	0.0470346	0.205116		1.70465e-06	0.00045683	0.205345	0.0799608		0.0469124	-0.40201	19.6055	0.0510062	0.267782		3.86671e-05	0.00045683	0.268011	1.81377		0.235267	0.0267037	21.2612	0.0470341	0.206541		1.66072e-06	0.000456853	0.20677	0.0778958
						-0.0464556	0.40201	19.5906	0.0510449	0.268239		3.86664e-05	0.00045683	0.268468	1.81374		0	0.235724	21.2602	0.0470363	0.205573		1.70465e-06	0.00045683	0.205802	0.0799608		0.0464556	-0.40201	19.5906	0.0510449	0.268239		3.86664e-05	0.00045683	0.268468	1.81374		0.235724	0.0266991	21.2604	0.0470357	0.206998		1.66073e-06	0.000456856	0.207227	0.0778959
						-0.0459987	0.40201	19.5758	0.0510835	0.268696		3.86658e-05	0.00045683	0.268925	1.81371		0	0.236181	21.2594	0.047038	0.20603		1.80016e-06	0.00045683	0.206259	0.0844408		0.0459987	-0.40201	19.5758	0.0510835	0.268696		3.86658e-05	0.00045683	0.268925	1.81371		0.236181	0.0266942	21.2597	0.0470374	0.207455		1.7664e-06	0.000456859	0.207683	0.0828517
						-0.0455419	0.40201	19.561	0.0511222	0.269153		5.5045e-05	0.00045683	0.269381	2.58202		0	0.236638	21.2586	0.0470398	0.206487		1.80016e-06	0.00045683	0.206715	0.0844408		0.0455419	-0.40201	19.561	0.0511222	0.269153		5.5045e-05	0.00045683	0.269381	2.58202		0.236638	0.026689	21.2589	0.0470392	0.207912		1.76641e-06	0.000456863	0.20814	0.0828517
						-0.0450851	0.40201	19.5399	0.0511772	0.26961		9.18241e-05	0.00045683	0.269838	4.30723		0	0.237095	21.2578	0.0470416	0.206944		1.80016e-06	0.00045683	0.207172	0.0844408		0.0450851	-0.40201	19.5399	0.0511772	0.26961		9.18241e-05	0.00045683	0.269838	4.30723		0.237095	0.0266835	21.2581	0.0470409	0.208369		1.76643e-06	0.000456867	0.208597	0.0828517
						-0.0446282	0.40201	19.5049	0.0512691	0.270067		9.1824e-05	0.00045683	0.270295	4.30722		0	0.237551	21.257	0.0470434	0.207401		1.80016e-06	0.00045683	0.207629	0.0844408		0.0446282	-0.40201	19.5049	0.0512691	0.270067		9.1824e-05	0.00045683	0.270295	4.30722		0.237551	0.0266777	21.2573	0.0470427	0.208826		1.76644e-06	0.000456871	0.209054	0.0828516
						-0.0441714	0.40201	19.4701	0.0513609	0.270523		9.18237e-05	0.00045683	0.270752	4.30721		0	0.238008	21.2562	0.0470452	0.207857		1.80016e-06	0.00045683	0.208086	0.0844408		0.0441714	-0.40201	19.4701	0.0513609	0.270523		9.18237e-05	0.00045683	0.270752	4.30721		0.238008	0.0266715	21.2565	0.0470444	0.209283		1.76645e-06	0.000456875	0.209511	0.0828514
						-0.0437146	0.40201	19.4353	0.0514527	0.27098		9.18235e-05	0.00045683	0.271209	4.3072		0	0.238465	21.2554	0.047047	0.208314		1.80016e-06	0.00045683	0.208543	0.0844408		0.0437146	-0.40201	19.4353	0.0514527	0.27098		9.18235e-05	0.00045683	0.271209	4.3072		0.238465	0.0266651	21.2557	0.0470462	0.209739		1.76647e-06	0.000456879	0.209968	0.0828513
						-0.0432578	0.40201	19.4007	0.0515445	0.271437		9.18232e-05	0.00045683	0.271666	4.30718		0	0.238922	21.2545	0.0470488	0.208771		1.80016e-06	0.00045683	0.209	0.0844408		0.0432578	-0.40201	19.4007	0.0515445	0.271437		9.18232e-05	0.00045683	0.271666	4.30718		0.238922	0.0266584	21.2549	0.047048	0.210196		1.76648e-06	0.000456884	0.210425	0.0828511
						-0.0428009	0.40201	19.3662	0.0516363	0.271894		9.18228e-05	0.00045683	0.272122	4.30717		0	0.239379	21.2537	0.0470506	0.209228		1.80016e-06	0.00045683	0.209456	0.0844408		0.0428009	-0.40201	19.3662	0.0516363	0.271894		9.18228e-05	0.00045683	0.272122	4.30717		0.239379	0.0266513	21.2541	0.0470497	0.210653		1.76172e-06	0.000456889	0.210882	0.082627
						-0.0423441	0.40201	19.3318	0.0517282	0.272351		9.18224e-05	0.00045683	0.272579	4.30715		0	0.239836	21.2529	0.0470524	0.209685		1.80016e-06	0.00045683	0.209913	0.0844408		0.0423441	-0.40201	19.3318	0.0517282	0.272351		9.18224e-05	0.00045683	0.272579	4.30715		0.239836	0.026644	21.2533	0.0470515	0.21111		1.75201e-06	0.000456893	0.211338	0.0821707
						-0.0418873	0.40201	19.2976	0.05182	0.272808		9.18221e-05	0.00045683	0.273036	4.30713		0	0.240292	21.2521	0.0470542	0.210142		1.80016e-06	0.00045683	0.21037	0.0844408		0.0418873	-0.40201	19.2976	0.05182	0.272808		9.18221e-05	0.00045683	0.273036	4.30713		0.240292	0.0266364	21.2525	0.0470533	0.211567		1.75203e-06	0.000456898	0.211795	0.0821708
						-0.0414304	0.40201	19.2634	0.0519118	0.273264		9.18217e-05	0.00045683	0.273493	4.30711		0	0.240749	21.2513	0.047056	0.210598		1.80016e-06	0.00045683	0.210827	0.0844408		0.0414304	-0.40201	19.2634	0.0519118	0.273264		9.18217e-05	0.00045683	0.273493	4.30711		0.240749	0.0266284	21.2517	0.047055	0.212024		1.75205e-06	0.000456903	0.212252	0.0821709
						-0.0409736	0.40201	19.2294	0.0520036	0.273721		9.18213e-05	0.00045683	0.27395	4.30709		0	0.241206	21.2505	0.0470578	0.211055		1.90386e-06	0.00045683	0.211284	0.0893053		0.0409736	-0.40201	19.2294	0.0520036	0.273721		9.18213e-05	0.00045683	0.27395	4.30709		0.241206	0.0266202	21.2509	0.0470568	0.212481		1.8669e-06	0.000456909	0.212709	0.0875563
						-0.0405168	0.40201	19.1955	0.0520955	0.274178		6.8654e-05	0.00045683	0.274407	3.22038		0	0.241663	21.2496	0.0470597	0.211512		1.90386e-06	0.00045683	0.211741	0.0893053		0.0405168	-0.40201	19.1955	0.0520955	0.274178		6.8654e-05	0.00045683	0.274407	3.22038		0.241663	0.0266117	21.2501	0.0470586	0.212938		1.86693e-06	0.000456914	0.213166	0.0875563
						-0.04006	0.40201	19.1703	0.0521641	0.274635		1.67884e-05	0.00045683	0.274863	0.787501		0	0.24212	21.2488	0.0470616	0.211969		1.90386e-06	0.00045683	0.212197	0.0893053		0.04006	-0.40201	19.1703	0.0521641	0.274635		1.67884e-05	0.00045683	0.274863	0.787501		0.24212	0.0266029	21.2492	0.0470605	0.213395		1.86695e-06	0.00045692	0.213623	0.0875563
						-0.0396031	0.40201	19.1641	0.0521809	0.275092		1.6788e-05	0.00045683	0.27532	0.787483		0	0.242577	21.2479	0.0470635	0.212426		1.90386e-06	0.00045683	0.212654	0.0893053		0.0396031	-0.40201	19.1641	0.0521809	0.275092		1.6788e-05	0.00045683	0.27532	0.787483		0.242577	0.0265938	21.2484	0.0470624	0.213851		1.86697e-06	0.000456927	0.21408	0.0875562
						-0.0391463	0.40201	19.1579	0.0521977	0.275549		1.67877e-05	0.00045683	0.275777	0.787466		0	0.243033	21.247	0.0470654	0.212883		1.90386e-06	0.00045683	0.213111	0.0893053		0.0391463	-0.40201	19.1579	0.0521977	0.275549		1.67877e-05	0.00045683	0.275777	0.787466		0.243033	0.0265844	21.2476	0.0470642	0.214308		1.867e-06	0.000456933	0.214537	0.087556
						-0.0386895	0.40201	19.1518	0.0522145	0.276005		1.67874e-05	0.00045683	0.276234	0.787451		0	0.24349	21.2462	0.0470673	0.213339		1.90386e-06	0.00045683	0.213568	0.0893053		0.0386895	-0.40201	19.1518	0.0522145	0.276005		1.67874e-05	0.00045683	0.276234	0.787451		0.24349	0.0265747	21.2467	0.0470661	0.214765		1.86702e-06	0.000456939	0.214994	0.0875559
						-0.0382326	0.40201	19.1456	0.0522313	0.276462		1.67871e-05	0.00045683	0.276691	0.787438		0	0.243947	21.2453	0.0470692	0.213796		1.90386e-06	0.00045683	0.214025	0.0893053		0.0382326	-0.40201	19.1456	0.0522313	0.276462		1.67871e-05	0.00045683	0.276691	0.787438		0.243947	0.0265647	21.2459	0.047068	0.215222		1.86704e-06	0.000456946	0.215451	0.0875557
						-0.0377758	0.40201	19.1395	0.052248	0.276919		1.67868e-05	0.00045683	0.277147	0.787427		0	0.244404	21.2445	0.0470711	0.214253		1.90386e-06	0.00045683	0.214481	0.0893053		0.0377758	-0.40201	19.1395	0.052248	0.276919		1.67868e-05	0.00045683	0.277147	0.787427		0.244404	0.0265544	21.245	0.0470698	0.215679		1.86536e-06	0.000456953	0.215908	0.0874757
						-0.037319	0.40201	19.1333	0.0522648	0.277376		1.67866e-05	0.00045683	0.277604	0.787416		0	0.244861	21.2436	0.047073	0.21471		1.90386e-06	0.00045683	0.214938	0.0893053		0.037319	-0.40201	19.1333	0.0522648	0.277376		1.67866e-05	0.00045683	0.277604	0.787416		0.244861	0.0265438	21.2442	0.0470717	0.216136		1.85118e-06	0.000456959	0.216365	0.0868091
						-0.0368621	0.40201	19.1272	0.0522816	0.277833		1.67864e-05	0.00045683	0.278061	0.787408		0	0.245317	21.2427	0.0470749	0.215167		1.90386e-06	0.00045683	0.215395	0.0893053		0.0368621	-0.40201	19.1272	0.0522816	0.277833		1.67864e-05	0.00045683	0.278061	0.787408		0.245317	0.0265329	21.2434	0.0470736	0.216593		1.85121e-06	0.000456966	0.216822	0.0868093
						-0.0364053	0.40201	19.121	0.0522984	0.27829		1.67863e-05	0.00045683	0.278518	0.7874		0	0.245774	21.2419	0.0470768	0.215624		1.90386e-06	0.00045683	0.215852	0.0893053		0.0364053	-0.40201	19.121	0.0522984	0.27829		1.67863e-05	0.00045683	0.278518	0.7874		0.245774	0.0265217	21.2425	0.0470754	0.21705		1.85124e-06	0.000456973	0.217279	0.0868095
						-0.0359485	0.40201	19.1149	0.0523152	0.278746		1.67861e-05	0.00045683	0.278975	0.787393		0	0.246231	21.241	0.0470787	0.21608		2.01676e-06	0.00045683	0.216309	0.0946008		0.0359485	-0.40201	19.1149	0.0523152	0.278746		1.67861e-05	0.00045683	0.278975	0.787393		0.246231	0.0265103	21.2417	0.0470773	0.217507		1.97637e-06	0.00045698	0.217736	0.0926758
						-0.0354917	0.40201	19.1088	0.052332	0.279203		2.58734e-05	0.00045683	0.279432	1.21365		0	0.246688	21.2401	0.0470807	0.216537		2.01676e-06	0.00045683	0.216766	0.0946008		0.0354917	-0.40201	19.1088	0.052332	0.279203		2.58734e-05	0.00045683	0.279432	1.21365		0.246688	0.0264985	21.2408	0.0470792	0.217964		1.9764e-06	0.000456988	0.218193	0.0926757
						-0.0350348	0.40201	19.0993	0.0523579	0.27966		4.62179e-05	0.00045683	0.279888	2.16796		0	0.247145	21.2392	0.0470828	0.216994		2.01676e-06	0.00045683	0.217222	0.0946008		0.0350348	-0.40201	19.0993	0.0523579	0.27966		4.62179e-05	0.00045683	0.279888	2.16796		0.247145	0.0264865	21.2399	0.0470812	0.218421		1.97644e-06	0.000456996	0.21865	0.0926757
						-0.034578	0.40201	19.0825	0.0524041	0.280117		4.62177e-05	0.00045683	0.280345	2.16795		0	0.247602	21.2383	0.0470848	0.217451		2.01676e-06	0.00045683	0.217679	0.0946008		0.034578	-0.40201	19.0825	0.0524041	0.280117		4.62177e-05	0.00045683	0.280345	2.16795		0.247602	0.0264742	21.239	0.0470832	0.218878		1.97647e-06	0.000457004	0.219107	0.0926756
						-0.0341212	0.40201	19.0657	0.0524503	0.280574		4.62177e-05	0.00045683	0.280802	2.16795		0	0.248058	21.2374	0.0470868	0.217908		2.01676e-06	0.00045683	0.218136	0.0946008		0.0341212	-0.40201	19.0657	0.0524503	0.280574		4.62177e-05	0.00045683	0.280802	2.16795		0.248058	0.0264615	21.2381	0.0470852	0.219335		1.9765e-06	0.000457013	0.219564	0.0926755
						-0.0336643	0.40201	19.0489	0.0524965	0.281031		4.62176e-05	0.00045683	0.281259	2.16795		0	0.248515	21.2365	0.0470888	0.218365		2.01676e-06	0.00045683	0.218593	0.0946008		0.0336643	-0.40201	19.0489	0.0524965	0.281031		4.62176e-05	0.00045683	0.281259	2.16795		0.248515	0.0264486	21.2372	0.0470871	0.219792		1.97654e-06	0.000457021	0.220021	0.0926753
						-0.0332075	0.40201	19.0321	0.0525427	0.281487		4.62176e-05	0.00045683	0.281716	2.16795		0	0.248972	21.2356	0.0470908	0.218821		2.01676e-06	0.00045683	0.21905	0.0946008		0.0332075	-0.40201	19.0321	0.0525427	0.281487		4.62176e-05	0.00045683	0.281716	2.16795		0.248972	0.0264354	21.2363	0.0470891	0.220249		1.97657e-06	0.000457029	0.220478	0.0926751
						-0.0327507	0.40201	19.0154	0.0525889	0.281944		4.62176e-05	0.00045683	0.282173	2.16795		0	0.249429	21.2347	0.0470928	0.219278		2.01676e-06	0.00045683	0.219507	0.0946008		0.0327507	-0.40201	19.0154	0.0525889	0.281944		4.62176e-05	0.00045683	0.282173	2.16795		0.249429	0.0264219	21.2354	0.0470911	0.220706		1.9766e-06	0.000457038	0.220935	0.0926749
						-0.0322938	0.40201	18.9987	0.0526352	0.282401		4.62176e-05	0.00045683	0.282629	2.16795		0	0.249886	21.2337	0.0470949	0.219735		2.01676e-06	0.00045683	0.219963	0.0946008		0.0322938	-0.40201	18.9987	0.0526352	0.282401		4.62176e-05	0.00045683	0.282629	2.16795		0.249886	0.0264081	21.2345	0.0470931	0.221163		1.96262e-06	0.000457046	0.221392	0.0920175
						-0.031837	0.40201	18.982	0.0526814	0.282858		4.62176e-05	0.00045683	0.283086	2.16795		0	0.250343	21.2328	0.0470969	0.220192		2.01676e-06	0.00045683	0.22042	0.0946008		0.031837	-0.40201	18.982	0.0526814	0.282858		4.62176e-05	0.00045683	0.283086	2.16795		0.250343	0.026394	21.2337	0.047095	0.22162		1.95918e-06	0.000457055	0.221849	0.0918546
						-0.0313802	0.40201	18.9654	0.0527276	0.283315		4.62176e-05	0.00045683	0.283543	2.16794		0	0.250799	21.2319	0.0470989	0.220649		2.01676e-06	0.00045683	0.220877	0.0946008		0.0313802	-0.40201	18.9654	0.0527276	0.283315		4.62176e-05	0.00045683	0.283543	2.16794		0.250799	0.0263797	21.2328	0.047097	0.222077		1.95922e-06	0.000457064	0.222306	0.0918548
						-0.0309234	0.40201	18.9488	0.0527738	0.283772		4.62176e-05	0.00045683	0.284	2.16794		0	0.251256	21.231	0.0471009	0.221106		2.13998e-06	0.00045683	0.221334	0.100381		0.0309234	-0.40201	18.9488	0.0527738	0.283772		4.62176e-05	0.00045683	0.284	2.16794		0.251256	0.026365	21.2319	0.0470989	0.222534		2.09589e-06	0.000457072	0.222763	0.0982606
						-0.0304665	0.40201	18.9322	0.05282	0.284228		0.000166577	0.00045683	0.284457	7.81368		0	0.251713	21.2301	0.047103	0.221562		2.13998e-06	0.00045683	0.221791	0.100381		0.0304665	-0.40201	18.9322	0.05282	0.284228		0.000166577	0.00045683	0.284457	7.81368		0.251713	0.0263501	21.231	0.047101	0.222991		2.09594e-06	0.000457082	0.22322	0.0982607
						-0.0300097	0.40201	18.8727	0.0529866	0.284685		0.00043603	0.00045683	0.284914	20.453		0	0.25217	21.2291	0.0471052	0.222019		2.13998e-06	0.00045683	0.222248	0.100381		0.0300097	-0.40201	18.8727	0.0529866	0.284685		0.00043603	0.00045683	0.284914	20.453		0.25217	0.0263349	21.23	0.0471031	0.223448		2.09598e-06	0.000457092	0.223677	0.0982606
						-0.0295529	0.40201	18.7187	0.0534226	0.285142		0.00043603	0.00045683	0.28537	20.453		0	0.252627	21.2281	0.0471073	0.222476		2.13998e-06	0.00045683	0.222704	0.100381		0.0295529	-0.40201	18.7187	0.0534226	0.285142		0.00043603	0.00045683	0.28537	20.453		0.252627	0.0263194	21.2291	0.0471052	0.223906		2.09603e-06	0.000457102	0.224134	0.0982605
						-0.029096	0.40201	18.5671	0.0538587	0.285599		0.00043603	0.00045683	0.285827	20.453		0	0.253084	21.2272	0.0471095	0.222933		2.13998e-06	0.00045683	0.223161	0.100381		0.029096	-0.40201	18.5671	0.0538587	0.285599		0.00043603	0.00045683	0.285827	20.453		0.253084	0.0263037	21.2281	0.0471073	0.224363		2.09607e-06	0.000457112	0.224591	0.0982604
						-0.0286392	0.40201	18.418	0.0542947	0.286056		0.00043603	0.00045683	0.286284	20.453		0	0.25354	21.2262	0.0471116	0.22339		2.13998e-06	0.00045683	0.223618	0.100381		0.0286392	-0.40201	18.418	0.0542947	0.286056		0.00043603	0.00045683	0.286284	20.453		0.25354	0.0262876	21.2272	0.0471094	0.22482		2.09612e-06	0.000457122	0.225048	0.0982603
						-0.0281824	0.40201	18.2713	0.0547307	0.286512		0.00043603	0.00045683	0.286741	20.453		0	0.253997	21.2252	0.0471137	0.223847		2.13998e-06	0.00045683	0.224075	0.100381		0.0281824	-0.40201	18.2713	0.0547307	0.286512		0.00043603	0.00045683	0.286741	20.453		0.253997	0.0262712	21.2262	0.0471115	0.225277		2.09616e-06	0.000457132	0.225505	0.0982601
						-0.0277256	0.40201	18.1269	0.0551668	0.286969		0.00043603	0.00045683	0.287198	20.453		0	0.254454	21.2243	0.0471159	0.224303		2.13998e-06	0.00045683	0.224532	0.100381		0.0277256	-0.40201	18.1269	0.0551668	0.286969		0.00043603	0.00045683	0.287198	20.453		0.254454	0.0262546	21.2253	0.0471136	0.225734		2.0962e-06	0.000457142	0.225963	0.0982599
						-0.0272687	0.40201	17.9847	0.0556028	0.287426		0.00043603	0.00045683	0.287655	20.453		0	0.254911	21.2233	0.047118	0.22476		2.13998e-06	0.00045683	0.224989	0.100381		0.0272687	-0.40201	17.9847	0.0556028	0.287426		0.00043603	0.00045683	0.287655	20.453		0.254911	0.0262377	21.2243	0.0471157	0.226191		2.08829e-06	0.000457153	0.22642	0.097887
						-0.0268119	0.40201	17.8448	0.0560388	0.287883		0.00043603	0.00045683	0.288111	20.453		0	0.255368	21.2223	0.0471202	0.225217		2.13998e-06	0.00045683	0.225445	0.100381		0.0268119	-0.40201	17.8448	0.0560388	0.287883		0.00043603	0.00045683	0.288111	20.453		0.255368	0.0262205	21.2234	0.0471178	0.226648		2.07701e-06	0.000457163	0.226877	0.097356
						-0.0263551	0.40201	17.707	0.0564748	0.28834		0.00043603	0.00045683	0.288568	20.453		0	0.255825	21.2214	0.0471223	0.225674		2.13998e-06	0.00045683	0.225902	0.100381		0.0263551	-0.40201	17.707	0.0564748	0.28834		0.00043603	0.00045683	0.288568	20.453		0.255825	0.0262031	21.2225	0.0471199	0.227105		2.07706e-06	0.000457173	0.227334	0.0973563
						-0.0258982	0.40201	17.5713	0.0569109	0.288797		0.00043603	0.00045683	0.289025	20.453		0	0.256281	21.2204	0.0471244	0.226131		2.27483e-06	0.00045683	0.226359	0.106706		0.0258982	-0.40201	17.5713	0.0569109	0.288797		0.00043603	0.00045683	0.289025	20.453		0.256281	0.0261853	21.2215	0.047122	0.227563		2.22673e-06	0.000457183	0.227791	0.104369
						-0.0254414	0.40201	17.4377	0.0573469	0.289253		0.000305062	0.00045683	0.289482	14.3096		0	0.256738	21.2194	0.0471267	0.226587		2.27483e-06	0.00045683	0.226816	0.106706		0.0254414	-0.40201	17.4377	0.0573469	0.289253		0.000305062	0.00045683	0.289482	14.3096		0.256738	0.0261674	21.2205	0.0471242	0.22802		2.22678e-06	0.000457195	0.228248	0.104369
						-0.0249846	0.40201	17.3455	0.057652	0.28971		1.18612e-05	0.00045683	0.289939	0.556376		0	0.257195	21.2184	0.047129	0.227044		2.27483e-06	0.00045683	0.227273	0.106706		0.0249846	-0.40201	17.3455	0.057652	0.28971		1.18612e-05	0.00045683	0.289939	0.556376		0.257195	0.0261491	21.2195	0.0471264	0.228477		2.22684e-06	0.000457206	0.228706	0.104369
						-0.0245277	0.40201	17.3419	0.0576638	0.290167		1.18612e-05	0.00045683	0.290396	0.556376		0	0.257652	21.2173	0.0471313	0.227501		2.27483e-06	0.00045683	0.22773	0.106706		0.0245277	-0.40201	17.3419	0.0576638	0.290167		1.18612e-05	0.00045683	0.290396	0.556376		0.257652	0.0261305	21.2185	0.0471286	0.228934		2.22689e-06	0.000457218	0.229163	0.104369
						-0.0240709	0.40201	17.3383	0.0576757	0.290624		1.18612e-05	0.00045683	0.290852	0.556375		0	0.258109	21.2163	0.0471335	0.227958		2.27483e-06	0.00045683	0.228186	0.106706		0.0240709	-0.40201	17.3383	0.0576757	0.290624		1.18612e-05	0.00045683	0.290852	0.556375		0.258109	0.0261117	21.2175	0.0471309	0.229391		2.22695e-06	0.00045723	0.22962	0.104369
						-0.0236141	0.40201	17.3348	0.0576876	0.291081		1.18611e-05	0.00045683	0.291309	0.556375		0	0.258566	21.2153	0.0471358	0.228415		2.27483e-06	0.00045683	0.228643	0.106706		0.0236141	-0.40201	17.3348	0.0576876	0.291081		1.18611e-05	0.00045683	0.291309	0.556375		0.258566	0.0260926	21.2165	0.0471331	0.229849		2.227e-06	0.000457241	0.230077	0.104369
						-0.0231573	0.40201	17.3312	0.0576994	0.291538		1.18611e-05	0.00045683	0.291766	0.556375		0	0.259022	21.2143	0.0471381	0.228872		2.27483e-06	0.00045683	0.2291	0.106706		0.0231573	-0.40201	17.3312	0.0576994	0.291538		1.18611e-05	0.00045683	0.291766	0.556375		0.259022	0.0260732	21.2155	0.0471353	0.230306		2.22706e-06	0.000457253	0.230535	0.104369
						-0.0227004	0.40201	17.3276	0.0577113	0.291994		1.18611e-05	0.00045683	0.292223	0.556375		0	0.259479	21.2132	0.0471404	0.229328		2.27483e-06	0.00045683	0.229557	0.106706		0.0227004	-0.40201	17.3276	0.0577113	0.291994		1.18611e-05	0.00045683	0.292223	0.556375		0.259479	0.0260535	21.2145	0.0471375	0.230763		2.22711e-06	0.000457264	0.230992	0.104368
						-0.0222436	0.40201	17.3241	0.0577231	0.292451		1.18611e-05	0.00045683	0.29268	0.556375		0	0.259936	21.2122	0.0471426	0.229785		2.27483e-06	0.00045683	0.230014	0.106706		0.0222436	-0.40201	17.3241	0.0577231	0.292451		1.18611e-05	0.00045683	0.29268	0.556375		0.259936	0.0260335	21.2135	0.0471398	0.23122		2.22716e-06	0.000457276	0.231449	0.104368
						-0.0217868	0.40201	17.3205	0.057735	0.292908		1.18611e-05	0.00045683	0.293137	0.556374		0	0.260393	21.2112	0.0471449	0.230242		2.27483e-06	0.00045683	0.230471	0.106706		0.0217868	-0.40201	17.3205	0.057735	0.292908		1.18611e-05	0.00045683	0.293137	0.556374		0.260393	0.0260133	21.2125	0.047142	0.231678		2.20718e-06	0.000457288	0.231906	0.103429
						-0.0213299	0.40201	17.317	0.0577469	0.293365		1.18611e-05	0.00045683	0.293593	0.556374		0	0.26085	21.2102	0.0471472	0.230699		2.27483e-06	0.00045683	0.230927	0.106706		0.0213299	-0.40201	17.317	0.0577469	0.293365		1.18611e-05	0.00045683	0.293593	0.556374		0.26085	0.0259929	21.2115	0.0471442	0.232135		2.20598e-06	0.000457299	0.232364	0.10337
						-0.0208731	0.40201	17.3134	0.0577587	0.293822		1.18611e-05	0.00045683	0.29405	0.556374		0	0.261307	21.2091	0.0471495	0.231156		2.42282e-06	0.00045683	0.231384	0.113648		0.0208731	-0.40201	17.3134	0.0577587	0.293822		1.18611e-05	0.00045683	0.29405	0.556374		0.261307	0.0259722	21.2105	0.0471464	0.232592		2.3703e-06	0.000457311	0.232821	0.111068
						-0.0204163	0.40201	17.3098	0.0577706	0.294279		1.18611e-05	0.00045683	0.294507	0.556374		0	0.261763	21.2081	0.0471519	0.231613		2.42282e-06	0.00045683	0.231841	0.113648		0.0204163	-0.40201	17.3098	0.0577706	0.294279		1.18611e-05	0.00045683	0.294507	0.556374		0.261763	0.0259512	21.2095	0.0471488	0.23305		2.37037e-06	0.000457324	0.233278	0.111068
						-0.0199594	0.40201	17.3063	0.0577824	0.294735		1.18611e-05	0.00045683	0.294964	0.556374		0	0.26222	21.207	0.0471543	0.232069		2.42282e-06	0.00045683	0.232298	0.113648		0.0199594	-0.40201	17.3063	0.0577824	0.294735		1.18611e-05	0.00045683	0.294964	0.556374		0.26222	0.0259299	21.2084	0.0471512	0.233507		2.37044e-06	0.000457337	0.233736	0.111068
						-0.0195026	0.40201	17.3027	0.0577943	0.295192		1.18611e-05	0.00045683	0.295421	0.556374		0	0.262677	21.2059	0.0471567	0.232526		2.42282e-06	0.00045683	0.232755	0.113648		0.0195026	-0.40201	17.3027	0.0577943	0.295192		1.18611e-05	0.00045683	0.295421	0.556374		0.262677	0.0259084	21.2073	0.0471535	0.233964		2.37051e-06	0.00045735	0.234193	0.111068
						-0.0190458	0.40201	17.2992	0.0578062	0.295649		1.18611e-05	0.00045683	0.295877	0.556374		0	0.263134	21.2048	0.0471592	0.232983		2.42282e-06	0.00045683	0.233212	0.113648		0.0190458	-0.40201	17.2992	0.0578062	0.295649		1.18611e-05	0.00045683	0.295877	0.556374		0.263134	0.0258866	21.2063	0.0471559	0.234422		2.37057e-06	0.000457363	0.23465	0.111068
						-0.018589	0.40201	17.2956	0.057818	0.296106		1.18611e-05	0.00045683	0.296334	0.556374		0	0.263591	21.2037	0.0471616	0.23344		2.42282e-06	0.00045683	0.233668	0.113648		0.018589	-0.40201	17.2956	0.057818	0.296106		1.18611e-05	0.00045683	0.296334	0.556374		0.263591	0.0258645	21.2052	0.0471583	0.234879		2.37064e-06	0.000457376	0.235108	0.111068
						-0.0181321	0.40201	17.2921	0.0578299	0.296563		1.18611e-05	0.00045683	0.296791	0.556374		0	0.264048	21.2026	0.047164	0.233897		2.42282e-06	0.00045683	0.234125	0.113648		0.0181321	-0.40201	17.2921	0.0578299	0.296563		1.18611e-05	0.00045683	0.296791	0.556374		0.264048	0.0258422	21.2041	0.0471606	0.235336		2.3707e-06	0.000457389	0.235565	0.111067
						-0.0176753	0.40201	17.2886	0.0578417	0.29702		9.4919e-06	0.00045683	0.297248	0.44524		0	0.264504	21.2015	0.0471664	0.234354		2.42282e-06	0.00045683	0.234582	0.113648		0.0176753	-0.40201	17.2886	0.0578417	0.29702		9.4919e-06	0.00045683	0.297248	0.44524		0.264504	0.0258196	21.2031	0.047163	0.235794		2.37077e-06	0.000457401	0.236022	0.111067
						-0.0172185	0.40201	17.2857	0.0578512	0.297476		0	0.00045683	0.297705	0		0	0.264961	21.2004	0.0471688	0.23481		2.42282e-06	0.00045683	0.235039	0.113648		0.0172185	-0.40201	17.2857	0.0578512	0.297476		0	0.00045683	0.297705	0		0.264961	0.0257967	21.202	0.0471654	0.236251		2.37083e-06	0.000457414	0.23648	0.111067
						-0.0167616	0.40201	17.2857	0.0578512	0.297933		0	0.00045683	0.298162	0		0	0.265418	21.1993	0.0471713	0.235267		2.42282e-06	0.00045683	0.235496	0.113648		0.0167616	-0.40201	17.2857	0.0578512	0.297933		0	0.00045683	0.298162	0		0.265418	0.0257736	21.2009	0.0471677	0.236709		2.36176e-06	0.000457427	0.236937	0.110639
						-0.0163048	0.40201	17.2857	0.0578512	0.29839		0	0.00045683	0.298618	0		0	0.265875	21.1983	0.0471737	0.235724		2.42282e-06	0.00045683	0.235952	0.113648		0.0163048	-0.40201	17.2857	0.0578512	0.29839		0	0.00045683	0.298618	0		0.265875	0.0257502	21.1999	0.0471701	0.237166		2.34736e-06	0.00045744	0.237395	0.109962
						-0.015848	0.40201	17.2857	0.0578512	0.298847		0	0.00045683	0.299075	0		0	0.266332	21.1972	0.0471761	0.236181		2.5857e-06	0.00045683	0.236409	0.121288		0.015848	-0.40201	17.2857	0.0578512	0.298847		0	0.00045683	0.299075	0		0.266332	0.0257266	21.1988	0.0471725	0.237623		2.52829e-06	0.000457452	0.237852	0.118434
						-0.0153912	0.40201	17.2857	0.0578512	0.299304		0	0.00045683	0.299532	0		0	0.266788	21.196	0.0471787	0.236638		2.5857e-06	0.00045683	0.236866	0.121288		0.0153912	-0.40201	17.2857	0.0578512	0.299304		0	0.00045683	0.299532	0		0.266788	0.0257027	21.1977	0.047175	0.238081		2.52837e-06	0.000457467	0.23831	0.118434
						-0.0149343	0.40201	17.2857	0.0578512	0.299761		0	0.00045683	0.299989	0		0	0.267245	21.1948	0.0471813	0.237095		2.5857e-06	0.00045683	0.237323	0.121288		0.0149343	-0.40201	17.2857	0.0578512	0.299761		0	0.00045683	0.299989	0		0.267245	0.0256786	21.1965	0.0471775	0.238538		2.52845e-06	0.000457481	0.238767	0.118434
						-0.0144775	0.40201	17.2857	0.0578512	0.300217		0	0.00045683	0.300446	0		0	0.267702	21.1937	0.0471839	0.237551		2.5857e-06	0.00045683	0.23778	0.121288		0.0144775	-0.40201	17.2857	0.0578512	0.300217		0	0.00045683	0.300446	0		0.267702	0.0256542	21.1954	0.04718	0.238996		2.52853e-06	0.000457495	0.239225	0.118434
						-0.0140207	0.40201	17.2857	0.0578512	0.300674		0	0.00045683	0.300903	0		0	0.268159	21.1925	0.0471865	0.238008		2.5857e-06	0.00045683	0.238237	0.121288		0.0140207	-0.40201	17.2857	0.0578512	0.300674		0	0.00045683	0.300903	0		0.268159	0.0256295	21.1943	0.0471826	0.239453		2.52861e-06	0.000457509	0.239682	0.118434
						-0.0135638	0.40201	17.2857	0.0578512	0.301131		0	0.00045683	0.301359	0		0	0.268616	21.1914	0.047189	0.238465		2.5857e-06	0.00045683	0.238693	0.121288		0.0135638	-0.40201	17.2857	0.0578512	0.301131		0	0.00045683	0.301359	0		0.268616	0.0256046	21.1931	0.0471851	0.239911		2.52868e-06	0.000457523	0.24014	0.118434
						-0.013107	0.40201	17.2857	0.0578512	0.301588		0	0.00045683	0.301816	0		0	0.269073	21.1902	0.0471916	0.238922		2.5857e-06	0.00045683	0.23915	0.121288		0.013107	-0.40201	17.2857	0.0578512	0.301588		0	0.00045683	0.301816	0		0.269073	0.0255794	21.192	0.0471876	0.240368		2.52876e-06	0.000457537	0.240597	0.118434
						-0.0126502	0.40201	17.2857	0.0578512	0.302045		0	0.00045683	0.302273	0		0	0.269529	21.189	0.0471942	0.239379		2.5857e-06	0.00045683	0.239607	0.121288		0.0126502	-0.40201	17.2857	0.0578512	0.302045		0	0.00045683	0.302273	0		0.269529	0.025554	21.1909	0.0471902	0.240826		2.52883e-06	0.000457551	0.241055	0.118434
						-0.0121933	0.40201	17.2857	0.0578512	0.302502		0	0.00045683	0.30273	0		0	0.269986	21.1879	0.0471968	0.239836		2.5857e-06	0.00045683	0.240064	0.121288		0.0121933	-0.40201	17.2857	0.0578512	0.302502		0	0.00045683	0.30273	0		0.269986	0.0255283	21.1897	0.0471927	0.241283		2.5289e-06	0.000457565	0.241512	0.118434
						-0.0117365	0.40201	17.2857	0.0578512	0.302958		0	0.00045683	0.303187	0		0	0.270443	21.1867	0.0471994	0.240292		2.5857e-06	0.00045683	0.240521	0.121288		0.0117365	-0.40201	17.2857	0.0578512	0.302958		0	0.00045683	0.303187	0		0.270443	0.0255024	21.1886	0.0471952	0.241741		2.52898e-06	0.000457578	0.24197	0.118433
						-0.0112797	0.40201	17.2857	0.0578512	0.303415		0	0.00045683	0.303644	0		0	0.2709	21.1856	0.047202	0.240749		2.5857e-06	0.00045683	0.240978	0.121288		0.0112797	-0.40201	17.2857	0.0578512	0.303415		0	0.00045683	0.303644	0		0.2709	0.0254762	21.1875	0.0471977	0.242199		2.50931e-06	0.000457592	0.242427	0.117509
						-0.0108229	0.40201	17.2857	0.0578512	0.303872		0	0.00045683	0.3041	0		0	0.271357	21.1844	0.0472046	0.241206		2.7655e-06	0.00045683	0.241434	0.129722		0.0108229	-0.40201	17.2857	0.0578512	0.303872		0	0.00045683	0.3041	0		0.271357	0.0254498	21.1863	0.0472003	0.242656		2.70261e-06	0.000457605	0.242885	0.126557
						-0.010366	0.40201	17.2857	0.0578512	0.304329		0	0.00045683	0.304557	0		0	0.271814	21.1832	0.0472073	0.241663		2.7655e-06	0.00045683	0.241891	0.129722		0.010366	-0.40201	17.2857	0.0578512	0.304329		0	0.00045683	0.304557	0		0.271814	0.0254232	21.1851	0.047203	0.243114		2.7027e-06	0.000457621	0.243343	0.126557
						-0.0099092	0.40201	17.2857	0.0578512	0.304786		0	0.00045683	0.305014	0		0	0.27227	21.1819	0.0472101	0.24212		2.7655e-06	0.00045683	0.242348	0.129722		0.0099092	-0.40201	17.2857	0.0578512	0.304786		0	0.00045683	0.305014	0		0.27227	0.0253963	21.1839	0.0472057	0.243571		2.70279e-06	0.000457636	0.2438	0.126558
						-0.00945237	0.40201	17.2857	0.0578512	0.305242		0	0.00045683	0.305471	0		0	0.272727	21.1807	0.0472129	0.242577		2.7655e-06	0.00045683	0.242805	0.129722		0.00945237	-0.40201	17.2857	0.0578512	0.305242		0	0.00045683	0.305471	0		0.272727	0.0253691	21.1827	0.0472084	0.244029		2.70289e-06	0.000457651	0.244258	0.126558
						-0.00899554	0.40201	17.2857	0.0578512	0.305699		0	0.00045683	0.305928	0		0	0.273184	21.1794	0.0472156	0.243033		2.7655e-06	0.00045683	0.243262	0.129722		0.00899554	-0.40201	17.2857	0.0578512	0.305699		0	0.00045683	0.305928	0		0.273184	0.0253417	21.1815	0.0472111	0.244487		2.70297e-06	0.000457666	0.244716	0.126558
						-0.00853871	0.40201	17.2857	0.0578512	0.306156		0	0.00045683	0.306385	0		0	0.273641	21.1782	0.0472184	0.24349		2.7655e-06	0.00045683	0.243719	0.129722		0.00853871	-0.40201	17.2857	0.0578512	0.306156		0	0.00045683	0.306385	0		0.273641	0.025314	21.1803	0.0472138	0.244944		2.70306e-06	0.000457681	0.245173	0.126558
						-0.00808188	0.40201	17.2857	0.0578512	0.306613		0	0.00045683	0.306841	0		0	0.274098	21.177	0.0472212	0.243947		2.7655e-06	0.00045683	0.244175	0.129722		0.00808188	-0.40201	17.2857	0.0578512	0.306613		0	0.00045683	0.306841	0		0.274098	0.0252861	21.1791	0.0472165	0.245402		2.70315e-06	0.000457696	0.245631	0.126558
						-0.00762505	0.40201	17.2857	0.0578512	0.30707		0	0.00045683	0.307298	0		0	0.274555	21.1757	0.0472239	0.244404		2.7655e-06	0.00045683	0.244632	0.129722		0.00762505	-0.40201	17.2857	0.0578512	0.30707		0	0.00045683	0.307298	0		0.274555	0.025258	21.1778	0.0472192	0.24586		2.70323e-06	0.00045771	0.246089	0.126558
						-0.00716822	0.40201	17.2857	0.0578512	0.307527		0	0.00045683	0.307755	0		0	0.275011	21.1745	0.0472267	0.244861		2.7655e-06	0.00045683	0.245089	0.129722		0.00716822	-0.40201	17.2857	0.0578512	0.307527		0	0.00045683	0.307755	0		0.275011	0.0252296	21.1766	0.0472219	0.246317		2.70332e-06	0.000457725	0.246546	0.126558
						-0.00671139	0.40201	17.2857	0.0578512	0.307983		0	0.00045683	0.308212	0		0	0.275468	21.1732	0.0472294	0.245317		2.7655e-06	0.00045683	0.245546	0.129722		0.00671139	-0.40201	17.2857	0.0578512	0.307983		0	0.00045683	0.308212	0		0.275468	0.025201	21.1754	0.0472246	0.246775		2.7034e-06	0.000457739	0.247004	0.126557
						-0.00625456	0.40201	17.2857	0.0578512	0.30844		0	0.00045683	0.308669	0		0	0.275925	21.172	0.0472322	0.245774		2.7655e-06	0.00045683	0.246003	0.129722		0.00625456	-0.40201	17.2857	0.0578512	0.30844		0	0.00045683	0.308669	0		0.275925	0.0251722	21.1742	0.0472273	0.247233		2.70229e-06	0.000457753	0.247462	0.126501
						-0.00579773	0.40201	17.2857	0.0578512	0.308897		0	0.00045683	0.309126	0		0	0.276382	21.1708	0.047235	0.246231		2.9646e-06	0.00045683	0.24646	0.139061		0.00579773	-0.40201	17.2857	0.0578512	0.308897		0	0.00045683	0.309126	0		0.276382	0.0251431	21.173	0.04723	0.247691		2.89539e-06	0.000457767	0.24792	0.135537
						-0.0053409	0.40201	17.2857	0.0578512	0.309354		0	0.00045683	0.309582	0		0	0.276839	21.1694	0.0472379	0.246688		2.9646e-06	0.00045683	0.246916	0.139061		0.0053409	-0.40201	17.2857	0.0578512	0.309354		0	0.00045683	0.309582	0		0.276839	0.0251138	21.1717	0.0472329	0.248148		2.89532e-06	0.000457784	0.248377	0.135529
						-0.00488407	0.40201	17.2857	0.0578512	0.309811		0	0.00045683	0.310039	0		0	0.277296	21.1681	0.0472409	0.247145		2.9646e-06	0.00045683	0.247373	0.139061		0.00488407	-0.40201	17.2857	0.0578512	0.309811		0	0.00045683	0.310039	0		0.277296	0.0250843	21.1704	0.0472358	0.248606		2.89542e-06	0.0004578	0.248835	0.135529
						-0.00442724	0.40201	17.2857	0.0578512	0.310268		0	0.00045683	0.310496	0		0	0.277752	21.1668	0.0472439	0.247602		2.9646e-06	0.00045683	0.24783	0.139061		0.00442724	-0.40201	17.2857	0.0578512	0.310268		0	0.00045683	0.310496	0		0.277752	0.0250545	21.1691	0.0472387	0.249064		2.89552e-06	0.000457815	0.249293	0.135529
						-0.00397041	0.40201	17.2857	0.0578512	0.310724		0	0.00045683	0.310953	0		0	0.278209	21.1654	0.0472468	0.248058		2.9646e-06	0.00045683	0.248287	0.139061		0.00397041	-0.40201	17.2857	0.0578512	0.310724		0	0.00045683	0.310953	0		0.278209	0.0250245	21.1678	0.0472416	0.249522		2.89562e-06	0.000457831	0.249751	0.135529
						-0.00351358	0.40201	17.2857	0.0578512	0.311181		0	0.00045683	0.31141	0		0	0.278666	21.1641	0.0472498	0.248515		2.9646e-06	0.00045683	0.248744	0.139061		0.00351358	-0.40201	17.2857	0.0578512	0.311181		0	0.00045683	0.31141	0		0.278666	0.0249942	21.1665	0.0472445	0.24998		2.89571e-06	0.000457846	0.250209	0.135529
						-0.00305675	0.40201	17.2857	0.0578512	0.311638		0	0.00045683	0.311867	0		0	0.279123	21.1628	0.0472528	0.248972		2.9646e-06	0.00045683	0.249201	0.139061		0.00305675	-0.40201	17.2857	0.0578512	0.311638		0	0.00045683	0.311867	0		0.279123	0.0249637	21.1652	0.0472474	0.250438		2.89581e-06	0.000457862	0.250666	0.135529
						-0.00259992	0.40201	17.2857	0.0578512	0.312095		0	0.00045683	0.312323	0		0	0.27958	21.1615	0.0472557	0.249429		2.9646e-06	0.00045683	0.249657	0.139061		0.00259992	-0.40201	17.2857	0.0578512	0.312095		0	0.00045683	0.312323	0		0.27958	0.024933	21.1639	0.0472503	0.250895		2.8959e-06	0.000457877	0.251124	0.135529
						-0.0021431	0.40201	17.2857	0.0578512	0.312552		0	0.00045683	0.31278	0		0	0.280037	21.1601	0.0472587	0.249886		2.9646e-06	0.00045683	0.250114	0.139061		0.0021431	-0.40201	17.2857	0.0578512	0.312552		0	0.00045683	0.31278	0		0.280037	0.024902	21.1626	0.0472532	0.251353		2.896e-06	0.000457892	0.251582	0.135528
						-0.00168627	0.40201	17.2857	0.0578512	0.313009		0	0.00045683	0.313237	0		0	0.280493	21.1588	0.0472617	0.250343		2.9646e-06	0.00045683	0.250571	0.139061		0.00168627	-0.40201	17.2857	0.0578512	0.313009		0	0.00045683	0.313237	0		0.280493	0.0248709	21.1613	0.047256	0.251811		2.89609e-06	0.000457906	0.25204	0.135528
						-0.00122944	0.40201	17.2857	0.0578512	0.313465		0	0.00045683	0.313694	0		0	0.28095	21.1575	0.0472646	0.250799		2.9646e-06	0.00045683	0.251028	0.139061		0.00122944	-0.40201	17.2857	0.0578512	0.313465		0	0.00045683	0.313694	0		0.28095	0.0248395	21.16	0.0472589	0.252269		2.89617e-06	0.000457921	0.252498	0.135528
						-0.000772606	0.40201	17.2857	0.0578512	0.313922		0	0.00045683	0.314151	0		0	0.281407	21.1561	0.0472676	0.251256		3.1858e-06	0.00045683	0.251485	0.149437		0.000772606	-0.40201	17.2857	0.0578512	0.313922		0	0.00045683	0.314151	0		0.281407	0.0248079	21.1587	0.0472618	0.252727		3.132e-06	0.000457935	0.252956	0.146559
						-0.000315777	0.40201	17.2857	0.0578512	0.314379		0	0.00045683	0.314608	0		0	0.281864	21.1547	0.0472708	0.251713		3.1858e-06	0.00045683	0.251942	0.149437		0.000315777	-0.40201	17.2857	0.0578512	0.314379		0	0.00045683	0.314608	0		0.281864	0.0247761	21.1573	0.047265	0.253185		3.10926e-06	0.000457952	0.253414	0.14549
						0.000141053	0.40201	17.2857	0.0578512	0.314836		0	0.000141053	0.314906	0		0	0.282321	21.1533	0.047274	0.25217		3.1858e-06	0.00045683	0.252398	0.149437		-0.000141053	-0.40201	17.2857	0.0578512	0.314836		0	0.000141053	0.314906	0		0.282321	0.024744	21.1559	0.0472681	0.253643		3.10938e-06	0.000457968	0.253872	0.14549
						0	0.40201	17.2857	0.0578512	0.314977							0	0.282778	21.1519	0.0472771	0.252627		3.1858e-06	0.00045683	0.252855	0.149437		0	-0.40201	17.2857	0.0578512	0.314977							0.282778	0.0247118	21.1545	0.0472712	0.254101		3.10949e-06	0.000457984	0.25433	0.14549
																	0	0.283234	21.1504	0.0472803	0.253084		3.1858e-06	0.00045683	0.253312	0.149437													0.283234	0.0246793	21.1531	0.0472743	0.254559		3.1096e-06	0.000458	0.254788	0.14549
																	0	0.283691	21.149	0.0472835	0.25354		3.1858e-06	0.00045683	0.253769	0.149437													0.283691	0.0246465	21.1518	0.0472774	0.255017		3.10971e-06	0.000458016	0.255246	0.14549
																	0	0.284148	21.1476	0.0472867	0.253997		3.1858e-06	0.00045683	0.254226	0.149437													0.284148	0.0246136	21.1504	0.0472805	0.255475		3.10981e-06	0.000458032	0.255704	0.14549
																	0	0.284605	21.1462	0.0472899	0.254454		3.1858e-06	0.00045683	0.254683	0.149437													0.284605	0.0245804	21.149	0.0472836	0.255933		3.10992e-06	0.000458047	0.256162	0.14549
																	0	0.285062	21.1447	0.0472931	0.254911		3.1858e-06	0.00045683	0.255139	0.149437													0.285062	0.0245471	21.1476	0.0472867	0.256391		3.11002e-06	0.000458062	0.25662	0.14549
																	0	0.285519	21.1433	0.0472963	0.255368		3.1858e-06	0.00045683	0.255596	0.149437													0.285519	0.0245135	21.1462	0.0472898	0.256849		3.11012e-06	0.000458077	0.257078	0.14549
																	0	0.285975	21.1419	0.0472994	0.255825		3.1858e-06	0.00045683	0.256053	0.149437													0.285975	0.0244797	21.1448	0.047293	0.257307		3.11021e-06	0.000458092	0.257536	0.14549
																	0	0.286432	21.1405	0.0473026	0.256281		3.43242e-06	0.00045683	0.25651	0.161006													0.286432	0.0244457	21.1434	0.0472961	0.257765		3.38183e-06	0.000458106	0.257994	0.158191
																	0	0.286889	21.1389	0.0473061	0.256738		3.43242e-06	0.00045683	0.256967	0.161006													0.286889	0.0244115	21.1419	0.0472995	0.258223		3.36848e-06	0.000458123	0.258452	0.15756
																	0	0.287346	21.1374	0.0473095	0.257195		3.43242e-06	0.00045683	0.257423	0.161006													0.287346	0.0243771	21.1404	0.0473028	0.258681		3.34763e-06	0.00045814	0.25891	0.15658
																	0	0.287803	21.1359	0.0473129	0.257652		3.43242e-06	0.00045683	0.25788	0.161006													0.287803	0.0243425	21.1389	0.0473062	0.25914		3.34776e-06	0.000458156	0.259369	0.15658
																	0	0.288259	21.1343	0.0473164	0.258109		3.43242e-06	0.00045683	0.258337	0.161006													0.288259	0.0243077	21.1374	0.0473095	0.259598		3.34788e-06	0.000458172	0.259827	0.15658
																	0	0.288716	21.1328	0.0473198	0.258566		3.43242e-06	0.00045683	0.258794	0.161006													0.288716	0.0242726	21.1359	0.0473129	0.260056		3.34799e-06	0.000458188	0.260285	0.15658
																	0	0.289173	21.1313	0.0473232	0.259022		3.43242e-06	0.00045683	0.259251	0.161006													0.289173	0.0242374	21.1344	0.0473162	0.260514		3.34811e-06	0.000458204	0.260743	0.15658
																	0	0.28963	21.1297	0.0473267	0.259479		3.43242e-06	0.00045683	0.259708	0.161006													0.28963	0.0242019	21.1329	0.0473196	0.260972		3.34822e-06	0.000458219	0.261201	0.15658
																	0	0.290087	21.1282	0.0473301	0.259936		3.43242e-06	0.00045683	0.260164	0.161006													0.290087	0.0241662	21.1314	0.0473229	0.26143		3.34833e-06	0.000458234	0.26166	0.15658
																	0	0.290544	21.1267	0.0473335	0.260393		3.43242e-06	0.00045683	0.260621	0.161006													0.290544	0.0241304	21.1299	0.0473263	0.261889		3.34844e-06	0.000458249	0.262118	0.15658
																	0	0.291	21.1251	0.047337	0.26085		3.43242e-06	0.00045683	0.261078	0.161006													0.291	0.0240943	21.1284	0.0473296	0.262347		3.34855e-06	0.000458264	0.262576	0.15658
																	0	0.291457	21.1236	0.0473404	0.261307		3.70841e-06	0.00045683	0.261535	0.173952													0.291457	0.0240581	21.1269	0.047333	0.262805		3.65258e-06	0.000458278	0.263034	0.170791
																	0	0.291914	21.122	0.0473441	0.261763		3.70841e-06	0.00045683	0.261992	0.173952													0.291914	0.0240217	21.1253	0.0473366	0.263263		3.6527e-06	0.000458295	0.263493	0.170791
																	0	0.292371	21.1203	0.0473478	0.26222		3.70841e-06	0.00045683	0.262449	0.173952													0.292371	0.0239851	21.1237	0.0473403	0.263722		3.63491e-06	0.000458312	0.263951	0.169953
																	0	0.292828	21.1186	0.0473515	0.262677		3.70841e-06	0.00045683	0.262905	0.173952													0.292828	0.0239483	21.122	0.0473439	0.26418		3.61401e-06	0.000458328	0.264409	0.168969
																	0	0.293285	21.117	0.0473552	0.263134		3.70841e-06	0.00045683	0.263362	0.173952													0.293285	0.0239112	21.1204	0.0473475	0.264638		3.61414e-06	0.000458344	0.264868	0.16897
																	0	0.293741	21.1153	0.0473589	0.263591		3.70841e-06	0.00045683	0.263819	0.173952													0.293741	0.023874	21.1188	0.0473511	0.265097		3.61427e-06	0.00045836	0.265326	0.16897
																	0	0.294198	21.1137	0.0473626	0.264048		3.70841e-06	0.00045683	0.264276	0.173952													0.294198	0.0238366	21.1172	0.0473547	0.265555		3.61439e-06	0.000458375	0.265784	0.16897
																	0	0.294655	21.112	0.0473664	0.264504		3.70841e-06	0.00045683	0.264733	0.173952													0.294655	0.023799	21.1156	0.0473583	0.266013		3.61452e-06	0.00045839	0.266243	0.16897
																	0	0.295112	21.1104	0.0473701	0.264961		3.70841e-06	0.00045683	0.26519	0.173952													0.295112	0.0237612	21.114	0.047362	0.266472		3.61464e-06	0.000458405	0.266701	0.16897
																	0	0.295569	21.1087	0.0473738	0.265418		3.70841e-06	0.00045683	0.265646	0.173952													0.295569	0.0237232	21.1124	0.0473656	0.26693		3.61475e-06	0.00045842	0.267159	0.16897
																	0	0.296026	21.1071	0.0473775	0.265875		3.70841e-06	0.00045683	0.266103	0.173952													0.296026	0.0236851	21.1108	0.0473692	0.267389		3.61487e-06	0.000458434	0.267618	0.16897
																	0	0.296482	21.1054	0.0473812	0.266332		4.0185e-06	0.00045683	0.26656	0.188497													0.296482	0.0236467	21.1092	0.0473728	0.267847		3.95651e-06	0.000458448	0.268076	0.184934
																	0	0.296939	21.1036	0.0473852	0.266788		4.0185e-06	0.00045683	0.267017	0.188497													0.296939	0.0236082	21.1074	0.0473768	0.268306		3.95665e-06	0.000458465	0.268535	0.184934
																	0	0.297396	21.1018	0.0473892	0.267245		4.0185e-06	0.00045683	0.267474	0.188497													0.297396	0.0235696	21.1056	0.0473807	0.268764		3.95678e-06	0.000458481	0.268993	0.184933
																	0	0.297853	21.1001	0.0473932	0.267702		4.0185e-06	0.00045683	0.267931	0.188497													0.297853	0.0235307	21.1039	0.0473847	0.269223		3.93643e-06	0.000458497	0.269452	0.183976
																	0	0.29831	21.0983	0.0473973	0.268159		4.0185e-06	0.00045683	0.268387	0.188497													0.29831	0.0234916	21.1021	0.0473886	0.269681		3.91281e-06	0.000458513	0.26991	0.182866
																	0	0.298767	21.0965	0.0474013	0.268616		4.0185e-06	0.00045683	0.268844	0.188497													0.298767	0.0234523	21.1004	0.0473925	0.27014		3.91294e-06	0.000458529	0.270369	0.182866
																	0	0.299223	21.0947	0.0474053	0.269073		4.0185e-06	0.00045683	0.269301	0.188497													0.299223	0.0234129	21.0986	0.0473964	0.270598		3.91308e-06	0.000458544	0.270827	0.182866
																	0	0.29968	21.0929	0.0474093	0.269529		4.0185e-06	0.00045683	0.269758	0.188497													0.29968	0.0233733	21.0969	0.0474004	0.271057		3.91321e-06	0.000458558	0.271286	0.182866
																	0	0.300137	21.0911	0.0474133	0.269986		4.0185e-06	0.00045683	0.270215	0.188497													0.300137	0.0233335	21.0951	0.0474043	0.271515		3.91334e-06	0.000458573	0.271744	0.182867
																	0	0.300594	21.0893	0.0474174	0.270443		4.0185e-06	0.00045683	0.270672	0.188497													0.300594	0.0232936	21.0934	0.0474082	0.271974		3.91346e-06	0.000458587	0.272203	0.182867
																	0	0.301051	21.0875	0.0474214	0.2709		4.0185e-06	0.00045683	0.271128	0.188497													0.301051	0.0232535	21.0917	0.0474121	0.272432		3.91358e-06	0.000458601	0.272662	0.182867
																	0	0.301508	21.0858	0.0474254	0.271357		4.36842e-06	0.00045683	0.271585	0.204911													0.301508	0.0232132	21.0899	0.047416	0.272891		4.29913e-06	0.000458614	0.27312	0.200876
																	0	0.301964	21.0838	0.0474298	0.271814		4.36842e-06	0.00045683	0.272042	0.204911													0.301964	0.0231728	21.088	0.0474203	0.27335		4.29927e-06	0.00045863	0.273579	0.200876
																	0	0.302421	21.0819	0.0474341	0.27227		4.36842e-06	0.00045683	0.272499	0.204911													0.302421	0.0231322	21.0861	0.0474246	0.273808		4.29941e-06	0.000458646	0.274038	0.200875
																	0	0.302878	21.0799	0.0474385	0.272727		4.36842e-06	0.00045683	0.272956	0.204911													0.302878	0.0230914	21.0842	0.0474289	0.274267		4.29954e-06	0.000458662	0.274496	0.200874
																	0	0.303335	21.078	0.0474429	0.273184		4.36842e-06	0.00045683	0.273413	0.204911													0.303335	0.0230504	21.0823	0.0474332	0.274725		4.27929e-06	0.000458677	0.274955	0.199922
																	0	0.303792	21.076	0.0474472	0.273641		4.36842e-06	0.00045683	0.273869	0.204911													0.303792	0.0230093	21.0804	0.0474375	0.275184		4.24934e-06	0.000458692	0.275414	0.198516
																	0	0.304249	21.0741	0.0474516	0.274098		4.36842e-06	0.00045683	0.274326	0.204911													0.304249	0.022968	21.0785	0.0474417	0.275643		4.24948e-06	0.000458706	0.275872	0.198516
																	0	0.304705	21.0722	0.047456	0.274555		4.36842e-06	0.00045683	0.274783	0.204911													0.304705	0.0229266	21.0766	0.047446	0.276102		4.24962e-06	0.000458721	0.276331	0.198517
																	0	0.305162	21.0702	0.0474603	0.275011		4.36842e-06	0.00045683	0.27524	0.204911													0.305162	0.022885	21.0747	0.0474502	0.27656		4.24975e-06	0.000458734	0.27679	0.198517
																	0	0.305619	21.0683	0.0474647	0.275468		4.36842e-06	0.00045683	0.275697	0.204911													0.305619	0.0228432	21.0728	0.0474545	0.277019		4.24988e-06	0.000458748	0.277248	0.198517
																	0	0.306076	21.0663	0.0474691	0.275925		4.36842e-06	0.00045683	0.276153	0.204911													0.306076	0.0228013	21.0709	0.0474587	0.277478		4.25001e-06	0.000458761	0.277707	0.198518
																	0	0.306533	21.0644	0.0474734	0.276382		4.76514e-06	0.00045683	0.27661	0.22352													0.306533	0.0227593	21.0691	0.047463	0.277937		4.68709e-06	0.000458773	0.278166	0.218927
																	0	0.306989	21.0623	0.0474782	0.276839		4.76514e-06	0.00045683	0.277067	0.22352													0.306989	0.0227171	21.067	0.0474677	0.278395		4.68724e-06	0.000458789	0.278625	0.218927
																	0	0.307446	21.0602	0.047483	0.277296		4.76514e-06	0.00045683	0.277524	0.22352													0.307446	0.0226747	21.0649	0.0474724	0.278854		4.68739e-06	0.000458805	0.279083	0.218927
																	0	0.307903	21.0581	0.0474877	0.277752		4.76514e-06	0.00045683	0.277981	0.22352													0.307903	0.0226322	21.0628	0.047477	0.279313		4.68753e-06	0.000458819	0.279542	0.218926
																	0	0.30836	21.056	0.0474925	0.278209		4.76514e-06	0.00045683	0.278438	0.22352													0.30836	0.0225895	21.0607	0.0474817	0.279772		4.68767e-06	0.000458834	0.280001	0.218926
																	0	0.308817	21.0538	0.0474973	0.278666		4.76514e-06	0.00045683	0.278894	0.22352													0.308817	0.0225467	21.0587	0.0474864	0.280231		4.67115e-06	0.000458848	0.28046	0.218148
																	0	0.309274	21.0517	0.047502	0.279123		4.76514e-06	0.00045683	0.279351	0.22352													0.309274	0.0225037	21.0566	0.0474911	0.280689		4.63006e-06	0.000458862	0.280919	0.216222
																	0	0.30973	21.0496	0.0475068	0.27958		4.76514e-06	0.00045683	0.279808	0.22352													0.30973	0.0224605	21.0545	0.0474957	0.281148		4.6302e-06	0.000458875	0.281378	0.216222
																	0	0.310187	21.0475	0.0475116	0.280037		4.76514e-06	0.00045683	0.280265	0.22352													0.310187	0.0224173	21.0525	0.0475003	0.281607		4.63034e-06	0.000458888	0.281837	0.216223
																	0	0.310644	21.0454	0.0475163	0.280493		4.76514e-06	0.00045683	0.280722	0.22352													0.310644	0.0223738	21.0504	0.047505	0.282066		4.63048e-06	0.0004589	0.282295	0.216223
																	0	0.311101	21.0433	0.0475211	0.28095		4.76514e-06	0.00045683	0.281179	0.22352													0.311101	0.0223303	21.0484	0.0475096	0.282525		4.63061e-06	0.000458912	0.282754	0.216224
																	0	0.311558	21.0412	0.0475259	0.281407		5.21722e-06	0.00045683	0.281635	0.244726													0.311558	0.0222866	21.0463	0.0475142	0.282984		5.1286e-06	0.000458924	0.283213	0.239471
																	0	0.312015	21.0389	0.0475311	0.281864		5.21722e-06	0.00045683	0.282092	0.244726													0.312015	0.0222428	21.0441	0.0475194	0.283443		5.12876e-06	0.000458939	0.283672	0.239471
																	0	0.312471	21.0366	0.0475363	0.282321		5.21722e-06	0.00045683	0.282549	0.244726													0.312471	0.0221989	21.0418	0.0475245	0.283902		5.12891e-06	0.000458954	0.284131	0.23947
																	0	0.312928	21.0343	0.0475415	0.282778		5.21722e-06	0.00045683	0.283006	0.244726													0.312928	0.0221548	21.0395	0.0475296	0.284361		5.12907e-06	0.000458968	0.28459	0.23947
																	0	0.313385	21.0319	0.0475467	0.283234		5.21722e-06	0.00045683	0.283463	0.244726													0.313385	0.0221105	21.0372	0.0475348	0.28482		5.12921e-06	0.000458981	0.285049	0.23947
																	0	0.313842	21.0296	0.0475519	0.283691		5.21722e-06	0.00045683	0.28392	0.244726													0.313842	0.0220661	21.035	0.0475399	0.285279		5.12935e-06	0.000458994	0.285508	0.239469
																	0	0.314299	21.0273	0.0475572	0.284148		5.21722e-06	0.00045683	0.284376	0.244726													0.314299	0.0220216	21.0327	0.047545	0.285738		5.12153e-06	0.000459007	0.285967	0.239098
																	0	0.314756	21.025	0.0475624	0.284605		5.21722e-06	0.00045683	0.284833	0.244726													0.314756	0.0219769	21.0304	0.0475501	0.286197		5.06288e-06	0.000459019	0.286426	0.236353
																	0	0.315212	21.0227	0.0475676	0.285062		5.21722e-06	0.00045683	0.28529	0.244726													0.315212	0.0219322	21.0282	0.0475552	0.286656		5.06303e-06	0.000459031	0.286885	0.236354
																	0	0.315669	21.0204	0.0475728	0.285519		5.21722e-06	0.00045683	0.285747	0.244726													0.315669	0.0218872	21.026	0.0475603	0.287115		5.06316e-06	0.000459043	0.287344	0.236355
																	0	0.316126	21.0181	0.047578	0.285975		5.21722e-06	0.00045683	0.286204	0.244726													0.316126	0.0218422	21.0237	0.0475653	0.287574		5.0633e-06	0.000459054	0.287803	0.236355
																	0	0.316583	21.0158	0.0475832	0.286432		5.73531e-06	0.00045683	0.286661	0.269028													0.316583	0.0217971	21.0215	0.0475704	0.288033		5.63382e-06	0.000459064	0.288262	0.262981
																	0	0.31704	21.0133	0.047589	0.286889		5.73531e-06	0.00045683	0.287117	0.269028													0.31704	0.0217518	21.019	0.047576	0.288492		5.63399e-06	0.000459078	0.288721	0.262981
																	0	0.317497	21.0107	0.0475947	0.287346		5.73531e-06	0.00045683	0.287574	0.269028													0.317497	0.0217065	21.0165	0.0475817	0.288951		5.63415e-06	0.000459092	0.28918	0.262981
																	0	0.317953	21.0082	0.0476005	0.287803		5.73531e-06	0.00045683	0.288031	0.269028													0.317953	0.0216609	21.014	0.0475873	0.28941		5.63431e-06	0.000459105	0.28964	0.262981
																	0	0.31841	21.0057	0.0476062	0.288259		5.73531e-06	0.00045683	0.288488	0.269028													0.31841	0.0216153	21.0115	0.0475929	0.289869		5.63446e-06	0.000459117	0.290099	0.262981
																	0	0.318867	21.0031	0.0476119	0.288716		5.73531e-06	0.00045683	0.288945	0.269028													0.318867	0.0215695	21.009	0.0475986	0.290328		5.6346e-06	0.000459129	0.290558	0.262981
																	0	0.319324	21.0006	0.0476177	0.289173		5.73531e-06	0.00045683	0.289402	0.269028													0.319324	0.0215236	21.0066	0.0476042	0.290787		5.63474e-06	0.000459141	0.291017	0.26298
																	0	0.319781	20.9981	0.0476234	0.28963		5.73531e-06	0.00045683	0.289858	0.269028													0.319781	0.0214776	21.0041	0.0476098	0.291246		5.63487e-06	0.000459152	0.291476	0.26298
																	0	0.320238	20.9956	0.0476291	0.290087		5.73531e-06	0.00045683	0.290315	0.269028													0.320238	0.0214315	21.0016	0.0476155	0.291706		5.56506e-06	0.000459163	0.291935	0.259716
																	0	0.320694	20.993	0.0476349	0.290544		5.73531e-06	0.00045683	0.290772	0.269028													0.320694	0.0213853	20.9991	0.047621	0.292165		5.55775e-06	0.000459173	0.292394	0.259369
																	0	0.321151	20.9905	0.0476406	0.291		5.73531e-06	0.00045683	0.291229	0.269028													0.321151	0.0213389	20.9967	0.0476266	0.292624		5.55789e-06	0.000459182	0.292854	0.25937
																	0	0.321608	20.988	0.0476463	0.291457		6.33276e-06	0.00045683	0.291686	0.297053													0.321608	0.0212925	20.9942	0.0476321	0.293083		6.21554e-06	0.000459192	0.293313	0.290055
																	0	0.322065	20.9852	0.0476527	0.291914		6.33276e-06	0.00045683	0.292143	0.297053													0.322065	0.021246	20.9915	0.0476384	0.293542		6.21571e-06	0.000459205	0.293772	0.290055
																	0	0.322522	20.9824	0.047659	0.292371		6.33276e-06	0.00045683	0.292599	0.297053													0.322522	0.0211994	20.9887	0.0476446	0.294002		6.21588e-06	0.000459217	0.294231	0.290055
																	0	0.322979	20.9796	0.0476653	0.292828		6.33276e-06	0.00045683	0.293056	0.297053													0.322979	0.0211526	20.986	0.0476508	0.294461		6.21604e-06	0.000459228	0.29469	0.290055
																	0	0.323435	20.9768	0.0476717	0.293285		6.33276e-06	0.00045683	0.293513	0.297053													0.323435	0.0211057	20.9833	0.047657	0.29492		6.21619e-06	0.00045924	0.29515	0.290055
																	0	0.323892	20.974	0.047678	0.293741		6.33276e-06	0.00045683	0.29397	0.297053													0.323892	0.0210587	20.9805	0.0476632	0.295379		6.21633e-06	0.00045925	0.295609	0.290055
																	0	0.324349	20.9712	0.0476843	0.294198		6.33276e-06	0.00045683	0.294427	0.297053													0.324349	0.0210116	20.9778	0.0476694	0.295838		6.21647e-06	0.00045926	0.296068	0.290055
																	0	0.324806	20.9685	0.0476907	0.294655		6.33276e-06	0.00045683	0.294884	0.297053													0.324806	0.0209644	20.9751	0.0476757	0.296298		6.2166e-06	0.00045927	0.296527	0.290055
																	0	0.325263	20.9657	0.047697	0.295112		6.33276e-06	0.00045683	0.29534	0.297053													0.325263	0.0209172	20.9723	0.0476819	0.296757		6.21673e-06	0.000459279	0.296987	0.290055
																	0	0.32572	20.9629	0.0477033	0.295569		6.33276e-06	0.00045683	0.295797	0.297053													0.32572	0.0208698	20.9696	0.0476881	0.297216		6.15839e-06	0.000459288	0.297446	0.287328
																	0	0.326176	20.9601	0.0477097	0.296026		6.33276e-06	0.00045683	0.296254	0.297053													0.326176	0.0208223	20.9669	0.0476942	0.297676		6.12668e-06	0.000459296	0.297905	0.285843
																	0	0.326633	20.9573	0.047716	0.296482		7.02658e-06	0.00045683	0.296711	0.329598													0.326633	0.0207748	20.9642	0.0477004	0.298135		6.89001e-06	0.000459304	0.298365	0.321451
																	0	0.32709	20.9542	0.047723	0.296939		7.02658e-06	0.00045683	0.297168	0.329598													0.32709	0.0207272	20.9612	0.0477073	0.298594		6.89019e-06	0.000459316	0.298824	0.321451
																	0	0.327547	20.9512	0.04773	0.297396		7.02658e-06	0.00045683	0.297624	0.329598													0.327547	0.0206795	20.9581	0.0477142	0.299053		6.89035e-06	0.000459326	0.299283	0.321451
																	0	0.328004	20.9481	0.0477371	0.297853		7.02658e-06	0.00045683	0.298081	0.329598													0.328004	0.0206316	20.9551	0.047721	0.299513		6.89051e-06	0.000459337	0.299742	0.321452
																	0	0.32846	20.945	0.0477441	0.29831		7.02658e-06	0.00045683	0.298538	0.329598													0.32846	0.0205837	20.9521	0.0477279	0.299972		6.89066e-06	0.000459346	0.300202	0.321452
																	0	0.328917	20.9419	0.0477511	0.298767		7.02658e-06	0.00045683	0.298995	0.329598													0.328917	0.0205357	20.9491	0.0477348	0.300432		6.8908e-06	0.000459355	0.300661	0.321452
																	0	0.329374	20.9388	0.0477582	0.299223		7.02658e-06	0.00045683	0.299452	0.329598													0.329374	0.0204876	20.946	0.0477417	0.300891		6.89093e-06	0.000459364	0.301121	0.321452
																	0	0.329831	20.9358	0.0477652	0.29968		7.02658e-06	0.00045683	0.299909	0.329598													0.329831	0.0204394	20.943	0.0477486	0.30135		6.89105e-06	0.000459372	0.30158	0.321452
																	0	0.330288	20.9327	0.0477722	0.300137		7.02658e-06	0.00045683	0.300365	0.329598													0.330288	0.0203911	20.94	0.0477555	0.30181		6.89117e-06	0.00045938	0.302039	0.321452
																	0	0.330745	20.9296	0.0477792	0.300594		7.02658e-06	0.00045683	0.300822	0.329598													0.330745	0.0203428	20.937	0.0477624	0.302269		6.89128e-06	0.000459387	0.302499	0.321452
																	0	0.331201	20.9265	0.0477863	0.301051		7.02658e-06	0.00045683	0.301279	0.329598													0.331201	0.0202944	20.934	0.0477693	0.302728		6.85361e-06	0.000459393	0.302958	0.31969
																	0	0.331658	20.9234	0.0477933	0.301508		7.83869e-06	0.00045683	0.301736	0.367692													0.331658	0.0202459	20.931	0.0477761	0.303188		7.67828e-06	0.0004594	0.303417	0.358153
																	0	0.332115	20.92	0.0478011	0.301964		7.83869e-06	0.00045683	0.302193	0.367692													0.332115	0.0201974	20.9276	0.0477838	0.303647		7.67845e-06	0.000459409	0.303877	0.358153
																	0	0.332572	20.9166	0.047809	0.302421		7.83869e-06	0.00045683	0.30265	0.367692													0.332572	0.0201488	20.9242	0.0477915	0.304107		7.67854e-06	0.000459418	0.304336	0.358151
																	0	0.333029	20.9132	0.0478168	0.302878		7.83869e-06	0.00045683	0.303106	0.367692													0.333029	0.0201001	20.9209	0.0477992	0.304566		7.671e-06	0.000459427	0.304796	0.357792
																	0	0.333486	20.9097	0.0478246	0.303335		7.83869e-06	0.00045683	0.303563	0.367692													0.333486	0.0200513	20.9175	0.0478068	0.305025		7.67112e-06	0.000459434	0.305255	0.357792
																	0	0.333942	20.9063	0.0478325	0.303792		7.83869e-06	0.00045683	0.30402	0.367692													0.333942	0.0200025	20.9142	0.0478145	0.305485		7.67123e-06	0.000459441	0.305715	0.357792
																	0	0.334399	20.9029	0.0478403	0.304249		7.83869e-06	0.00045683	0.304477	0.367692													0.334399	0.0199535	20.9108	0.0478222	0.305944		7.67134e-06	0.000459448	0.306174	0.357792
																	0	0.334856	20.8994	0.0478482	0.304705		7.83869e-06	0.00045683	0.304934	0.367692													0.334856	0.0199046	20.9074	0.0478299	0.306404		7.67143e-06	0.000459454	0.306633	0.357791
																	0	0.335313	20.896	0.047856	0.305162		7.83869e-06	0.00045683	0.305391	0.367692													0.335313	0.0198555	20.9041	0.0478375	0.306863		7.67152e-06	0.000459459	0.307093	0.357791
																	0	0.33577	20.8926	0.0478638	0.305619		7.83869e-06	0.00045683	0.305847	0.367692													0.33577	0.0198064	20.9007	0.0478452	0.307323		7.6716e-06	0.000459464	0.307552	0.357791
																	0	0.336227	20.8892	0.0478717	0.306076		7.83869e-06	0.00045683	0.306304	0.367692													0.336227	0.0197573	20.8974	0.0478529	0.307782		7.67167e-06	0.000459469	0.308012	0.357791
																	0	0.336683	20.8858	0.0478795	0.306533		8.79785e-06	0.00045683	0.306761	0.412684													0.336683	0.0197081	20.894	0.0478605	0.308242		8.71121e-06	0.000459473	0.308471	0.406269
																	0	0.33714	20.8819	0.0478883	0.306989		8.79785e-06	0.00045683	0.307218	0.412684													0.33714	0.0196589	20.8902	0.0478693	0.308701		8.59924e-06	0.00045948	0.308931	0.401041
																	0	0.337597	20.8781	0.0478971	0.307446		8.79785e-06	0.00045683	0.307675	0.412684													0.337597	0.0196096	20.8865	0.0478779	0.309161		8.59937e-06	0.000459487	0.30939	0.401041
																	0	0.338054	20.8743	0.0479059	0.307903		8.79785e-06	0.00045683	0.308132	0.412684													0.338054	0.0195603	20.8827	0.0478865	0.30962		8.59948e-06	0.000459493	0.30985	0.401041
																	0	0.338511	20.8704	0.0479147	0.30836		8.79785e-06	0.00045683	0.308588	0.412684													0.338511	0.0195109	20.879	0.0478951	0.31008		8.59958e-06	0.000459498	0.310309	0.401041
																	0	0.338968	20.8666	0.0479235	0.308817		8.79785e-06	0.00045683	0.309045	0.412684													0.338968	0.0194614	20.8752	0.0479037	0.310539		8.59967e-06	0.000459503	0.310769	0.401041
																	0	0.339424	20.8628	0.0479323	0.309274		8.79785e-06	0.00045683	0.309502	0.412684													0.339424	0.0194119	20.8715	0.0479123	0.310999		8.59975e-06	0.000459508	0.311228	0.40104
																	0	0.339881	20.8589	0.0479411	0.30973		8.79785e-06	0.00045683	0.309959	0.412684													0.339881	0.0193624	20.8677	0.0479209	0.311458		8.59982e-06	0.000459512	0.311688	0.40104
																	0	0.340338	20.8551	0.0479499	0.310187		8.79785e-06	0.00045683	0.310416	0.412684													0.340338	0.0193128	20.864	0.0479294	0.311918		8.59989e-06	0.000459515	0.312147	0.40104
																	0	0.340795	20.8513	0.0479587	0.310644		8.79785e-06	0.00045683	0.310873	0.412684													0.340795	0.0192632	20.8603	0.047938	0.312377		8.59994e-06	0.000459518	0.312607	0.40104
																	0	0.341252	20.8475	0.0479675	0.311101		8.79785e-06	0.00045683	0.311329	0.412684													0.341252	0.0192136	20.8565	0.0479466	0.312837		8.59998e-06	0.00045952	0.313066	0.40104
																	0	0.341709	20.8436	0.0479763	0.311558		9.94258e-06	0.00045683	0.311786	0.46638													0.341709	0.0191639	20.8528	0.0479552	0.313296		9.84541e-06	0.000459522	0.313526	0.459116
																	0	0.342165	20.8393	0.0479862	0.312015		9.94258e-06	0.00045683	0.312243	0.46638													0.342165	0.0191142	20.8485	0.0479651	0.313756		9.8455e-06	0.000459527	0.313985	0.459115
																	0	0.342622	20.835	0.0479962	0.312471		9.94258e-06	0.00045683	0.3127	0.46638													0.342622	0.0190645	20.8442	0.0479749	0.314215		9.7483e-06	0.000459531	0.314445	0.454579
																	0	0.343079	20.8307	0.0480061	0.312928		9.94258e-06	0.00045683	0.313157	0.46638													0.343079	0.0190148	20.84	0.0479847	0.314675		9.70659e-06	0.000459535	0.314904	0.45263
																	0	0.343536	20.8264	0.0480161	0.313385		9.94258e-06	0.00045683	0.313614	0.46638													0.343536	0.018965	20.8358	0.0479944	0.315134		9.70665e-06	0.000459538	0.315364	0.45263
																	0	0.343993	20.8221	0.048026	0.313842		9.94258e-06	0.00045683	0.31407	0.46638													0.343993	0.0189152	20.8316	0.0480041	0.315594		9.7067e-06	0.00045954	0.315824	0.45263
																	0	0.34445	20.8177	0.0480359	0.314299		9.94258e-06	0.00045683	0.314527	0.46638													0.34445	0.0188653	20.8273	0.0480138	0.316053		9.70674e-06	0.000459542	0.316283	0.45263
																	0	0.344906	20.8134	0.0480459	0.314756		9.94258e-06	0.00045683	0.314984	0.46638													0.344906	0.0188155	20.8231	0.0480235	0.316513		9.70677e-06	0.000459543	0.316743	0.45263
																	0	0.345363	20.8091	0.0480558	0.315212		9.94258e-06	0.00045683	0.315441	0.46638													0.345363	0.0187656	20.8189	0.0480332	0.316972		9.70679e-06	0.000459544	0.317202	0.45263
																	0	0.34582	20.8048	0.0480658	0.315669		9.94258e-06	0.00045683	0.315898	0.46638													0.34582	0.0187157	20.8147	0.0480429	0.317432		9.7068e-06	0.000459545	0.317662	0.45263
																	0	0.346277	20.8005	0.0480757	0.316126		9.94258e-06	0.00045683	0.316354	0.46638													0.346277	0.0186658	20.8105	0.0480526	0.317891		9.7068e-06	0.000459545	0.318121	0.45263
																	0	0.346734	20.7962	0.0480857	0.316583		1.13256e-05	0.00045683	0.316811	0.531253													0.346734	0.018616	20.8063	0.0480623	0.318351		1.12111e-05	0.000459544	0.318581	0.522775
																	0	0.34719	20.7913	0.048097	0.31704		1.13256e-05	0.00045683	0.317268	0.531253													0.34719	0.0185661	20.8015	0.0480736	0.318811		1.12111e-05	0.000459546	0.31904	0.522775
																	0	0.347647	20.7864	0.0481083	0.317497		1.13256e-05	0.00045683	0.317725	0.531253													0.347647	0.0185162	20.7966	0.0480848	0.31927		1.12111e-05	0.000459547	0.3195	0.522775
																	0	0.348104	20.7815	0.0481196	0.317953		1.13256e-05	0.00045683	0.318182	0.531253													0.348104	0.0184663	20.7918	0.048096	0.31973		1.11523e-05	0.000459547	0.319959	0.52003
																	0	0.348561	20.7766	0.048131	0.31841		1.13256e-05	0.00045683	0.318639	0.531253													0.348561	0.0184164	20.7869	0.0481071	0.320189		1.10439e-05	0.000459547	0.320419	0.514977
																	0	0.349018	20.7718	0.0481423	0.318867		1.13256e-05	0.00045683	0.319095	0.531253													0.349018	0.0183665	20.7822	0.0481182	0.320649		1.10439e-05	0.000459546	0.320878	0.514977
																	0	0.349475	20.7669	0.0481536	0.319324		1.13256e-05	0.00045683	0.319552	0.531253													0.349475	0.0183166	20.7774	0.0481292	0.321108		1.10438e-05	0.000459545	0.321338	0.514977
																	0	0.349931	20.762	0.0481649	0.319781		1.13256e-05	0.00045683	0.320009	0.531253													0.349931	0.0182667	20.7726	0.0481403	0.321568		1.10438e-05	0.000459543	0.321798	0.514976
																	0	0.350388	20.7571	0.0481763	0.320238		1.13256e-05	0.00045683	0.320466	0.531253													0.350388	0.0182169	20.7679	0.0481513	0.322027		1.10437e-05	0.000459541	0.322257	0.514976
																	0	0.350845	20.7522	0.0481876	0.320694		1.13256e-05	0.00045683	0.320923	0.531253													0.350845	0.018167	20.7631	0.0481623	0.322487		1.10437e-05	0.000459539	0.322717	0.514976
																	0	0.351302	20.7474	0.0481989	0.321151		1.13256e-05	0.00045683	0.32138	0.531253													0.351302	0.0181172	20.7583	0.0481734	0.322946		1.10436e-05	0.000459536	0.323176	0.514976
																	0	0.351759	20.7425	0.0482102	0.321608		1.30211e-05	0.00045683	0.321836	0.610785													0.351759	0.0180674	20.7536	0.0481844	0.323406		1.28878e-05	0.000459532	0.323636	0.600977
																	0	0.352216	20.7369	0.0482233	0.322065		1.30211e-05	0.00045683	0.322293	0.610785													0.352216	0.0180176	20.748	0.0481973	0.323866		1.28877e-05	0.00045953	0.324095	0.600977
																	0	0.352672	20.7313	0.0482363	0.322522		1.30211e-05	0.00045683	0.32275	0.610785													0.352672	0.0179679	20.7425	0.0482102	0.324325		1.28876e-05	0.000459526	0.324555	0.600977
																	0	0.353129	20.7257	0.0482493	0.322979		1.30211e-05	0.00045683	0.323207	0.610785													0.353129	0.0179182	20.737	0.0482231	0.324785		1.28875e-05	0.000459523	0.325014	0.600978
																	0	0.353586	20.7201	0.0482623	0.323435		1.30211e-05	0.00045683	0.323664	0.610785													0.353586	0.0178685	20.7314	0.048236	0.325244		1.28862e-05	0.000459518	0.325474	0.60092
																	0	0.354043	20.7145	0.0482753	0.323892		1.30211e-05	0.00045683	0.324121	0.610785													0.354043	0.0178189	20.7259	0.0482489	0.325704		1.26847e-05	0.000459514	0.325933	0.591531
																	0	0.3545	20.7089	0.0482884	0.324349		1.30211e-05	0.00045683	0.324577	0.610785													0.3545	0.0177693	20.7204	0.0482616	0.326163		1.26846e-05	0.000459509	0.326393	0.591531
																	0	0.354957	20.7033	0.0483014	0.324806		1.30211e-05	0.00045683	0.325034	0.610785													0.354957	0.0177197	20.715	0.0482742	0.326623		1.26844e-05	0.000459503	0.326852	0.59153
																	0	0.355413	20.6978	0.0483144	0.325263		1.30211e-05	0.00045683	0.325491	0.610785													0.355413	0.0176702	20.7095	0.0482869	0.327082		1.26842e-05	0.000459498	0.327312	0.591529
																	0	0.35587	20.6922	0.0483274	0.32572		1.30211e-05	0.00045683	0.325948	0.610785													0.35587	0.0176208	20.7041	0.0482996	0.327542		1.26841e-05	0.000459491	0.327771	0.591529
																	0	0.356327	20.6866	0.0483404	0.326176		1.30211e-05	0.00045683	0.326405	0.610785													0.356327	0.0175714	20.6987	0.0483123	0.328001		1.26839e-05	0.000459485	0.328231	0.591528
																	0	0.356784	20.681	0.0483535	0.326633		1.51375e-05	0.00045683	0.326862	0.710058													0.356784	0.0175221	20.6932	0.048325	0.328461		1.4987e-05	0.000459478	0.32869	0.698946
																	0	0.357241	20.6746	0.0483686	0.32709		1.51375e-05	0.00045683	0.327318	0.710058													0.357241	0.0174728	20.6868	0.04834	0.32892		1.49867e-05	0.00045947	0.32915	0.698947
																	0	0.357698	20.6681	0.0483837	0.327547		1.51375e-05	0.00045683	0.327775	0.710058													0.357698	0.0174236	20.6804	0.048355	0.32938		1.49864e-05	0.000459461	0.329609	0.698948
																	0	0.358154	20.6616	0.0483989	0.328004		1.51375e-05	0.00045683	0.328232	0.710058													0.358154	0.0173745	20.674	0.0483699	0.329839		1.49862e-05	0.000459452	0.330069	0.698949
																	0	0.358611	20.6552	0.048414	0.32846		1.51375e-05	0.00045683	0.328689	0.710058													0.358611	0.0173255	20.6676	0.0483849	0.330298		1.49859e-05	0.000459443	0.330528	0.69895
																	0	0.359068	20.6487	0.0484292	0.328917		1.51375e-05	0.00045683	0.329146	0.710058													0.359068	0.0172766	20.6612	0.0483999	0.330758		1.49856e-05	0.000459433	0.330988	0.698951
																	0	0.359525	20.6423	0.0484443	0.329374		1.51375e-05	0.00045683	0.329603	0.710058													0.359525	0.0172277	20.6548	0.0484149	0.331217		1.48179e-05	0.000459423	0.331447	0.691146
																	0	0.359982	20.6358	0.0484594	0.329831		1.51375e-05	0.00045683	0.330059	0.710058													0.359982	0.017179	20.6485	0.0484297	0.331677		1.47377e-05	0.000459413	0.331906	0.68742
																	0	0.360439	20.6294	0.0484746	0.330288		1.51375e-05	0.00045683	0.330516	0.710058													0.360439	0.0171303	20.6422	0.0484445	0.332136		1.47373e-05	0.000459403	0.332366	0.687418
																	0	0.360895	20.6229	0.0484897	0.330745		1.51375e-05	0.00045683	0.330973	0.710058													0.360895	0.0170818	20.6359	0.0484592	0.332596		1.47369e-05	0.000459392	0.332825	0.687415
																	0	0.361352	20.6165	0.0485048	0.331201		1.51375e-05	0.00045683	0.33143	0.710058													0.361352	0.0170333	20.6296	0.0484739	0.333055		1.47365e-05	0.000459381	0.333285	0.687413
																	0	0.361809	20.6101	0.04852	0.331658		1.78401e-05	0.00045683	0.331887	0.836831													0.361809	0.016985	20.6234	0.0484887	0.333514		1.76814e-05	0.00045937	0.333744	0.824801
																	0	0.362266	20.6025	0.0485378	0.332115		1.78401e-05	0.00045683	0.332344	0.836831													0.362266	0.0169367	20.6159	0.0485063	0.333974		1.76808e-05	0.000459354	0.334203	0.824802
																	0	0.362723	20.5949	0.0485557	0.332572		1.78401e-05	0.00045683	0.3328	0.836831													0.362723	0.0168886	20.6083	0.048524	0.334433		1.76802e-05	0.000459338	0.334663	0.824803
																	0	0.36318	20.5874	0.0485735	0.333029		1.78401e-05	0.00045683	0.333257	0.836831													0.36318	0.0168407	20.6008	0.0485417	0.334892		1.76796e-05	0.000459321	0.335122	0.824804
																	0	0.363636	20.5798	0.0485913	0.333486		1.78401e-05	0.00045683	0.333714	0.836831													0.363636	0.0167929	20.5933	0.0485594	0.335352		1.7679e-05	0.000459305	0.335581	0.824806
																	0	0.364093	20.5722	0.0486092	0.333942		1.78401e-05	0.00045683	0.334171	0.836831													0.364093	0.0167453	20.5858	0.0485771	0.335811		1.76784e-05	0.000459289	0.336041	0.824807
																	0	0.36455	20.5647	0.048627	0.334399		1.78401e-05	0.00045683	0.334628	0.836831													0.36455	0.0166978	20.5784	0.0485947	0.33627		1.76778e-05	0.000459272	0.3365	0.824808
																	0	0.365007	20.5572	0.0486449	0.334856		1.78401e-05	0.00045683	0.335085	0.836831													0.365007	0.0166505	20.5709	0.0486124	0.33673		1.75604e-05	0.000459256	0.336959	0.819363
																	0	0.365464	20.5496	0.0486627	0.335313		1.78401e-05	0.00045683	0.335541	0.836831													0.365464	0.0166034	20.5634	0.04863	0.337189		1.73729e-05	0.000459239	0.337418	0.810639
																	0	0.365921	20.5421	0.0486805	0.33577		1.78401e-05	0.00045683	0.335998	0.836831													0.365921	0.0165564	20.5561	0.0486474	0.337648		1.73721e-05	0.000459223	0.337878	0.810633
																	0	0.366377	20.5346	0.0486984	0.336227		1.78401e-05	0.00045683	0.336455	0.836831													0.366377	0.0165096	20.5488	0.0486647	0.338107		1.73714e-05	0.000459206	0.338337	0.810628
																	0	0.366834	20.527	0.0487162	0.336683		2.13973e-05	0.00045683	0.336912	1.00369													0.366834	0.0164629	20.5414	0.0486821	0.338567		2.12553e-05	0.000459189	0.338796	0.991906
																	0	0.367291	20.518	0.0487376	0.33714		2.13973e-05	0.00045683	0.337369	1.00369													0.367291	0.0164164	20.5325	0.0487034	0.339026		2.12541e-05	0.000459163	0.339255	0.991907
																	0	0.367748	20.509	0.048759	0.337597		2.13973e-05	0.00045683	0.337825	1.00369													0.367748	0.0163702	20.5235	0.0487246	0.339485		2.12529e-05	0.000459136	0.339714	0.991908
																	0	0.368205	20.5	0.0487804	0.338054		2.13973e-05	0.00045683	0.338282	1.00369													0.368205	0.0163242	20.5146	0.0487459	0.339944		2.12517e-05	0.00045911	0.340174	0.991908
																	0	0.368661	20.491	0.0488018	0.338511		2.13973e-05	0.00045683	0.338739	1.00369													0.368661	0.0162785	20.5056	0.0487671	0.340403		2.12505e-05	0.000459084	0.340633	0.991909
																	0	0.369118	20.4821	0.0488232	0.338968		2.13973e-05	0.00045683	0.339196	1.00369													0.369118	0.0162331	20.4967	0.0487884	0.340862		2.12493e-05	0.000459059	0.341092	0.991908
																	0	0.369575	20.4731	0.0488446	0.339424		2.13973e-05	0.00045683	0.339653	1.00369													0.369575	0.0161879	20.4878	0.0488096	0.341321		2.12482e-05	0.000459034	0.341551	0.991908
																	0	0.370032	20.4641	0.048866	0.339881		2.13973e-05	0.00045683	0.34011	1.00369													0.370032	0.016143	20.4789	0.0488309	0.34178		2.1247e-05	0.00045901	0.34201	0.991907
																	0	0.370489	20.4552	0.0488874	0.340338		2.13973e-05	0.00045683	0.340566	1.00369													0.370489	0.0160983	20.4699	0.0488521	0.342239		2.11871e-05	0.000458986	0.342469	0.989163
																	0	0.370946	20.4462	0.0489088	0.340795		2.13973e-05	0.00045683	0.341023	1.00369													0.370946	0.0160538	20.4611	0.0488733	0.342698		2.08707e-05	0.000458962	0.342928	0.974441
																	0	0.371402	20.4373	0.0489302	0.341252		2.13973e-05	0.00045683	0.34148	1.00369													0.371402	0.0160097	20.4523	0.0488942	0.343157		2.08693e-05	0.000458938	0.343387	0.974428
																	0	0.371859	20.4283	0.0489516	0.341709		2.62826e-05	0.00045683	0.341937	1.23285													0.371859	0.0159657	20.4436	0.048915	0.343616		2.6212e-05	0.000458915	0.343846	1.22395
																	0	0.372316	20.4174	0.0489779	0.342165		2.62826e-05	0.00045683	0.342394	1.23285													0.372316	0.015922	20.4327	0.0489412	0.344075		2.62096e-05	0.000458873	0.344305	1.22395
																	0	0.372773	20.4064	0.0490042	0.342622		2.62826e-05	0.00045683	0.342851	1.23285													0.372773	0.0158788	20.4217	0.0489675	0.344534		2.62072e-05	0.000458832	0.344763	1.22394
																	0	0.37323	20.3955	0.0490304	0.343079		2.62826e-05	0.00045683	0.343307	1.23285													0.37323	0.0158359	20.4108	0.0489937	0.344993		2.62049e-05	0.000458793	0.345222	1.22394
																	0	0.373687	20.3846	0.0490567	0.343536		2.62826e-05	0.00045683	0.343764	1.23285													0.373687	0.0157935	20.3999	0.0490199	0.345452		2.62026e-05	0.000458755	0.345681	1.22394
																	0	0.374143	20.3736	0.049083	0.343993		2.62826e-05	0.00045683	0.344221	1.23285													0.374143	0.0157515	20.389	0.0490461	0.34591		2.62004e-05	0.000458719	0.34614	1.22393
																	0	0.3746	20.3627	0.0491093	0.34445		2.62826e-05	0.00045683	0.344678	1.23285													0.3746	0.01571	20.3781	0.0490723	0.346369		2.61982e-05	0.000458683	0.346598	1.22392
																	0	0.375057	20.3519	0.0491356	0.344906		2.62826e-05	0.00045683	0.345135	1.23285													0.375057	0.0156688	20.3672	0.0490985	0.346828		2.61961e-05	0.000458649	0.347057	1.22392
																	0	0.375514	20.341	0.0491619	0.345363		2.62826e-05	0.00045683	0.345592	1.23285													0.375514	0.0156279	20.3564	0.0491247	0.347286		2.61941e-05	0.000458616	0.347516	1.22391
																	0	0.375971	20.3301	0.0491881	0.34582		2.62826e-05	0.00045683	0.346048	1.23285													0.375971	0.0155875	20.3455	0.0491509	0.347745		2.61754e-05	0.000458583	0.347974	1.22312
																	0	0.376428	20.3192	0.0492144	0.346277		2.62826e-05	0.00045683	0.346505	1.23285													0.376428	0.0155474	20.3347	0.049177	0.348204		2.57343e-05	0.000458552	0.348433	1.20259
																	0	0.376884	20.3084	0.0492407	0.346734		3.34344e-05	0.00045683	0.346962	1.56832													0.376884	0.0155077	20.3241	0.0492028	0.348662		3.35346e-05	0.000458522	0.348891	1.56722
																	0	0.377341	20.2946	0.0492741	0.34719		3.34344e-05	0.00045683	0.347419	1.56832													0.377341	0.0154684	20.3102	0.0492363	0.349121		3.35298e-05	0.00045846	0.34935	1.5672
																	0	0.377798	20.2809	0.0493076	0.347647		3.34344e-05	0.00045683	0.347876	1.56832													0.377798	0.0154298	20.2964	0.0492698	0.349579		3.35252e-05	0.000458402	0.349808	1.56719
																	0	0.378255	20.2671	0.049341	0.348104		3.34344e-05	0.00045683	0.348333	1.56832													0.378255	0.0153918	20.2826	0.0493034	0.350038		3.35208e-05	0.000458347	0.350267	1.56717
																	0	0.378712	20.2534	0.0493744	0.348561		3.34344e-05	0.00045683	0.348789	1.56832													0.378712	0.0153546	20.2688	0.0493369	0.350496		3.35166e-05	0.000458295	0.350725	1.56715
																	0	0.379169	20.2397	0.0494079	0.349018		3.34344e-05	0.00045683	0.349246	1.56832													0.379169	0.0153179	20.2551	0.0493704	0.350954		3.35126e-05	0.000458246	0.351183	1.56713
																	0	0.379625	20.226	0.0494413	0.349475		3.34344e-05	0.00045683	0.349703	1.56832													0.379625	0.0152819	20.2413	0.0494039	0.351412		3.35087e-05	0.0004582	0.351642	1.5671
																	0	0.380082	20.2123	0.0494747	0.349931		3.34344e-05	0.00045683	0.35016	1.56832													0.380082	0.0152465	20.2276	0.0494374	0.351871		3.35049e-05	0.000458157	0.3521	1.56708
																	0	0.380539	20.1987	0.0495082	0.350388		3.34344e-05	0.00045683	0.350617	1.56832													0.380539	0.0152117	20.2139	0.0494709	0.352329		3.35013e-05	0.000458115	0.352558	1.56705
																	0	0.380996	20.1851	0.0495416	0.350845		3.34344e-05	0.00045683	0.351074	1.56832													0.380996	0.0151774	20.2002	0.0495044	0.352787		3.34978e-05	0.000458076	0.353016	1.56702
																	0	0.381453	20.1714	0.049575	0.351302		3.34344e-05	0.00045683	0.35153	1.56832													0.381453	0.0151436	20.1866	0.0495379	0.353245		3.34512e-05	0.000458038	0.353474	1.56497
																	0	0.38191	20.1578	0.0496085	0.351759		4.50595e-05	0.00045683	0.351987	2.11362													0.38191	0.0151104	20.1729	0.0495714	0.353703		4.54535e-05	0.000458002	0.353932	2.12664
																	0	0.382366	20.1396	0.0496535	0.352216		4.50595e-05	0.00045683	0.352444	2.11362													0.382366	0.0150776	20.1545	0.0496168	0.354161		4.5344e-05	0.000457919	0.35439	2.12191
																	0	0.382823	20.1213	0.0496986	0.352672		4.50595e-05	0.00045683	0.352901	2.11362													0.382823	0.015046	20.1361	0.0496622	0.354619		4.53318e-05	0.000457848	0.354848	2.12166
																	0	0.38328	20.1031	0.0497437	0.353129		4.50595e-05	0.00045683	0.353358	2.11362													0.38328	0.0150155	20.1177	0.0497075	0.355077		4.53275e-05	0.000457785	0.355306	2.12176
																	0	0.383737	20.0849	0.0497887	0.353586		4.50595e-05	0.00045683	0.353815	2.11362													0.383737	0.014986	20.0994	0.0497528	0.355535		4.53235e-05	0.000457727	0.355763	2.12184
																	0	0.384194	20.0667	0.0498338	0.354043		4.50595e-05	0.00045683	0.354271	2.11362													0.384194	0.0149573	20.0811	0.0497982	0.355992		4.53198e-05	0.000457675	0.356221	2.1219
																	0	0.384651	20.0486	0.0498788	0.3545		4.50595e-05	0.00045683	0.354728	2.11362													0.384651	0.0149295	20.0628	0.0498435	0.35645		4.53163e-05	0.000457628	0.356679	2.12196
																	0	0.385107	20.0305	0.0499239	0.354957		4.50595e-05	0.00045683	0.355185	2.11362													0.385107	0.0149025	20.0446	0.0498888	0.356908		4.53131e-05	0.000457585	0.357136	2.12201
																	0	0.385564	20.0124	0.049969	0.355413		4.50595e-05	0.00045683	0.355642	2.11362													0.385564	0.0148762	20.0264	0.0499341	0.357365		4.531e-05	0.000457546	0.357594	2.12205
																	0	0.386021	19.9944	0.050014	0.35587		4.50595e-05	0.00045683	0.356099	2.11362													0.386021	0.0148506	20.0082	0.0499794	0.357823		4.53072e-05	0.00045751	0.358051	2.12208
																	0	0.386478	19.9764	0.0500591	0.356327		4.50595e-05	0.00045683	0.356556	2.11362													0.386478	0.0148257	19.9901	0.0500247	0.35828		4.53045e-05	0.000457477	0.358509	2.12211
																	0	0.386935	19.9584	0.0501041	0.356784		6.80078e-05	0.00045683	0.357012	3.19007													0.386935	0.0148013	19.972	0.05007	0.358738		6.83955e-05	0.000457446	0.358966	3.20393
																	0	0.387392	19.9314	0.0501721	0.357241		6.80078e-05	0.00045683	0.357469	3.19007													0.387392	0.0147776	19.9448	0.0501384	0.359195		6.85463e-05	0.000457357	0.359424	3.21162
																	0	0.387848	19.9044	0.0502402	0.357698		6.80078e-05	0.00045683	0.357926	3.19007													0.387848	0.0147556	19.9176	0.050207	0.359653		6.85404e-05	0.000457285	0.359881	3.21185
																	0	0.388305	19.8775	0.0503082	0.358154		6.80078e-05	0.00045683	0.358383	3.19007													0.388305	0.0147352	19.8904	0.0502755	0.36011		6.85352e-05	0.000457226	0.360338	3.21202
																	0	0.388762	19.8507	0.0503762	0.358611		6.80078e-05	0.00045683	0.35884	3.19007													0.388762	0.0147162	19.8633	0.050344	0.360567		6.85306e-05	0.000457177	0.360796	3.21214
																	0	0.389219	19.8239	0.0504442	0.359068		6.80078e-05	0.00045683	0.359296	3.19007													0.389219	0.0146984	19.8363	0.0504126	0.361024		6.85265e-05	0.000457137	0.361253	3.21223
																	0	0.389676	19.7972	0.0505122	0.359525		6.80078e-05	0.00045683	0.359753	3.19007													0.389676	0.0146816	19.8094	0.0504811	0.361481		6.85228e-05	0.000457103	0.36171	3.2123
																	0	0.390132	19.7706	0.0505802	0.359982		6.80078e-05	0.00045683	0.36021	3.19007													0.390132	0.0146658	19.7825	0.0505496	0.361938		6.85195e-05	0.000457074	0.362167	3.21235
																	0	0.390589	19.744	0.0506482	0.360439		6.80078e-05	0.00045683	0.360667	3.19007													0.390589	0.0146509	19.7558	0.0506181	0.362396		6.85165e-05	0.000457049	0.362624	3.21239
																	0	0.391046	19.7176	0.0507162	0.360895		6.80078e-05	0.00045683	0.361124	3.19007													0.391046	0.0146367	19.7291	0.0506867	0.362853		6.85138e-05	0.000457027	0.363081	3.21241
																	0	0.391503	19.6912	0.0507842	0.361352		6.80078e-05	0.00045683	0.361581	3.19007													0.391503	0.0146233	19.7024	0.0507552	0.36331		6.85113e-05	0.000457008	0.363538	3.21242
																	0	0.39196	19.6648	0.0508522	0.361809		0.00013775	0.00045683	0.362037	6.46149													0.39196	0.0146105	19.6759	0.0508237	0.363767		0.000137897	0.000456992	0.363995	6.46608
																	0	0.392417	19.6117	0.05099	0.362266		0.00013775	0.00045683	0.362494	6.46149													0.392417	0.0145983	19.6226	0.0509616	0.364224		0.000138113	0.000456941	0.364452	6.47694
																	0	0.392873	19.5589	0.0511277	0.362723		0.00013775	0.00045683	0.362951	6.46149													0.392873	0.0145882	19.5696	0.0510997	0.364681		0.000138119	0.00045691	0.364909	6.47765
																	0	0.39333	19.5063	0.0512655	0.36318		0.00013775	0.00045683	0.363408	6.46149													0.39333	0.0145797	19.5168	0.0512378	0.365137		0.000138115	0.00045689	0.365366	6.47775
																	0	0.393787	19.454	0.0514032	0.363636		0.00013775	0.00045683	0.363865	6.46149													0.393787	0.0145723	19.4644	0.0513759	0.365594		0.000138112	0.000456876	0.365823	6.47781
																	0	0.394244	19.402	0.051541	0.364093		0.00013775	0.00045683	0.364322	6.46149													0.394244	0.0145658	19.4122	0.051514	0.366051		0.00013811	0.000456866	0.36628	6.47784
																	0	0.394701	19.3503	0.0516787	0.36455		0.00013775	0.00045683	0.364778	6.46149													0.394701	0.01456	19.3603	0.0516521	0.366508		0.000138108	0.000456859	0.366737	6.47784
																	0	0.395158	19.2989	0.0518165	0.365007		0.00013775	0.00045683	0.365235	6.46149													0.395158	0.0145548	19.3087	0.0517903	0.366965		0.000138106	0.000456853	0.367193	6.47784
																	0	0.395614	19.2477	0.0519542	0.365464		0.00013775	0.00045683	0.365692	6.46149													0.395614	0.0145502	19.2573	0.0519284	0.367422		0.000138104	0.000456849	0.36765	6.47784
																	0	0.396071	19.1968	0.052092	0.365921		0.00013775	0.00045683	0.366149	6.46149													0.396071	0.0145459	19.2062	0.0520665	0.367879		0.000138103	0.000456846	0.368107	6.47783
																	0	0.396528	19.1462	0.0522297	0.366377		0.00013775	0.00045683	0.366606	6.46149													0.396528	0.014542	19.1554	0.0522046	0.368335		0.000138102	0.000456844	0.368564	6.47781
																	0	0.396985	19.0958	0.0523675	0.366834		0.000498524	0.00045683	0.367063	23.3845													0.396985	0.0145385	19.1049	0.0523427	0.368792		0.000498427	0.000456841	0.369021	23.3793
																	0	0.397442	18.9158	0.052866	0.367291		0.000498524	0.00045683	0.367519	23.3845													0.397442	0.0145352	18.9247	0.0528411	0.369249		0.00049828	0.000456844	0.369478	23.3723
																	0	0.397899	18.739	0.0533645	0.367748		0.000498524	0.00045683	0.367976	23.3845													0.397899	0.0145315	18.7479	0.0533394	0.369706		0.000498249	0.000456848	0.369934	23.3706
																	0	0.398355	18.5656	0.053863	0.368205		0.000498524	0.00045683	0.368433	23.3845													0.398355	0.0145274	18.5744	0.0538376	0.370163		0.000498251	0.000456854	0.370391	23.3704
																	0	0.398812	18.3953	0.0543616	0.368661		0.000498524	0.00045683	0.36889	23.3845													0.398812	0.0145227	18.404	0.0543359	0.37062		0.000498254	0.000456862	0.370848	23.3701
																	0	0.399269	18.2282	0.0548601	0.369118		0.000498524	0.00045683	0.369347	23.3845													0.399269	0.0145173	18.2368	0.0548341	0.371077		0.000498257	0.000456875	0.371305	23.3696
																	0	0.399726	18.064	0.0553586	0.369575		0.000498524	0.00045683	0.369804	23.3845													0.399726	0.0145109	18.0726	0.0553324	0.371533		0.000498262	0.000456896	0.371762	23.3688
																	0	0.400183	17.9028	0.0558571	0.370032		0.000498524	0.00045683	0.37026	23.3845													0.400183	0.0145031	17.9113	0.0558306	0.37199		0.00049827	0.000456935	0.372219	23.3671
																	0	0.40064	17.7444	0.0563557	0.370489		0.000498524	0.00045683	0.370717	23.3845													0.40064	0.0144933	17.7529	0.0563289	0.372447		0.000498283	0.000457022	0.372676	23.3633
																	0	0.401096	17.5889	0.0568542	0.370946		0.000498524	0.00045683	0.371174	23.3845													0.401096	0.01448	17.5972	0.0568272	0.372904		0.000498308	0.000457271	0.373133	23.3518
																	0	0.401553	17.436	0.0573527	0.371402		0.000498524	0.00045683	0.371631	23.3845													0.401553	0.01446	17.4442	0.0573255	0.373362		0.000498308	0.000458624	0.373591	23.2828
																	0	0.40201	17.2857	0.0578512	0.371859																		0.40201	0.0144194	17.2939	0.0578238	0.37382		2.74246e-05	0.00045683	0.374049	1.28642
																																							0.40201	0.0139626	17.2857	0.0578512	0.374277		0	0.00045683	0.374505	0
																																							0.40201	0.0135058	17.2857	0.0578512	0.374734		0	0.00045683	0.374962	0
																																							0.40201	0.0130489	17.2857	0.0578512	0.375191		0	0.00045683	0.375419	0
																																							0.40201	0.0125921	17.2857	0.0578512	0.375648		0	0.00045683	0.375876	0
																																							0.40201	0.0121353	17.2857	0.0578512	0.376104		0	0.00045683	0.376333	0
																																							0.40201	0.0116784	17.2857	0.0578512	0.376561		0	0.00045683	0.37679	0
																																							0.40201	0.0112216	17.2857	0.0578512	0.377018		0	0.00045683	0.377246	0
																																							0.40201	0.0107648	17.2857	0.0578512	0.377475		0	0.00045683	0.377703	0
																																							0.40201	0.010308	17.2857	0.0578512	0.377932		0	0.00045683	0.37816	0
																																							0.40201	0.00985113	17.2857	0.0578512	0.378389		0	0.00045683	0.378617	0
																																							0.40201	0.0093943	17.2857	0.0578512	0.378845		0	0.00045683	0.379074	0
																																							0.40201	0.00893747	17.2857	0.0578512	0.379302		0	0.00045683	0.379531	0
																																							0.40201	0.00848064	17.2857	0.0578512	0.379759		0	0.00045683	0.379987	0
																																							0.40201	0.00802381	17.2857	0.0578512	0.380216		0	0.00045683	0.380444	0
																																							0.40201	0.00756698	17.2857	0.0578512	0.380673		0	0.00045683	0.380901	0
																																							0.40201	0.00711015	17.2857	0.0578512	0.381129		0	0.00045683	0.381358	0
																																							0.40201	0.00665332	17.2857	0.0578512	0.381586		0	0.00045683	0.381815	0
																																							0.40201	0.00619649	17.2857	0.0578512	0.382043		0	0.00045683	0.382272	0
																																							0.40201	0.00573966	17.2857	0.0578512	0.3825		0	0.00045683	0.382728	0
																																							0.40201	0.00528283	17.2857	0.0578512	0.382957		0	0.00045683	0.383185	0
																																							0.40201	0.004826	17.2857	0.0578512	0.383414		0	0.00045683	0.383642	0
																																							0.40201	0.00436917	17.2857	0.0578512	0.38387		0	0.00045683	0.384099	0
																																							0.40201	0.00391234	17.2857	0.0578512	0.384327		0	0.00045683	0.384556	0
																																							0.40201	0.00345551	17.2857	0.0578512	0.384784		0	0.00045683	0.385013	0
																																							0.40201	0.00299869	17.2857	0.0578512	0.385241		0	0.00045683	0.385469	0
																																							0.40201	0.00254186	17.2857	0.0578512	0.385698		0	0.00045683	0.385926	0
																																							0.40201	0.00208503	17.2857	0.0578512	0.386155		0	0.00045683	0.386383	0
																																							0.40201	0.0016282	17.2857	0.0578512	0.386611		0	0.00045683	0.38684	0
																																							0.40201	0.00117137	17.2857	0.0578512	0.387068		0	0.00045683	0.387297	0
																																							0.40201	0.000714537	17.2857	0.0578512	0.387525		0	0.00045683	0.387754	0
																																							0.40201	0.000257708	17.2857	0.0578512	0.387982		0	0.00045683	0.38821	0
																																							0.40201	-0.000199122	17.2857	0.0578512	0.388439		0	0.000199122	0.388538	0
																																							0.40201	0	17.2857	0.0578512	0.388638
																																							0.40201	-0.000199122	17.2857	0.0578512	0.388439		0	0.000199122	0.388538	0
																																							0.40201	0	17.2857	0.0578512	0.388638
[truncated: 65 more columns]

## Sheet: Cond_matrix
																				0.464812	0.464764	0.464694	0.464614	0.464528	0.464436	0.46434	0.46424	0.464135	0.464027	0.463914	0.463798	0.463677	0.463552	0.463422	0.463288	0.463149	0.463006	0.462857	0.462702	0.462542	0.462376	0.462204	0.462024	0.461838	0.461644	0.461441	0.461231	0.46101	0.46078
																				0.464764	0.464742	0.464689	0.464625	0.464551	0.464472	0.464387	0.464297	0.464204	0.464106	0.464003	0.463897	0.463787	0.463673	0.463555	0.463432	0.463305	0.463174	0.463038	0.462896	0.46275	0.462598	0.462441	0.462277	0.462107	0.46193	0.461746	0.461555	0.461355	0.461146
																				0.464694	0.464689	0.46465	0.464596	0.464532	0.464461	0.464384	0.464302	0.464216	0.464125	0.46403	0.463931	0.463828	0.463722	0.463611	0.463496	0.463377	0.463254	0.463126	0.462994	0.462857	0.462715	0.462568	0.462415	0.462256	0.462091	0.461919	0.46174	0.461554	0.46136
																				0.464614	0.464625	0.464596	0.46455	0.464494	0.46443	0.46436	0.464285	0.464204	0.46412	0.464031	0.463938	0.463842	0.463741	0.463637	0.463528	0.463416	0.463299	0.463179	0.463054	0.462924	0.46279	0.462651	0.462507	0.462357	0.462202	0.46204	0.461872	0.461697	0.461515
																				0.464528	0.464551	0.464532	0.464494	0.464445	0.464388	0.464323	0.464254	0.464179	0.4641	0.464017	0.463929	0.463838	0.463743	0.463644	0.463541	0.463435	0.463324	0.46321	0.463091	0.462969	0.462841	0.462709	0.462573	0.462431	0.462284	0.462131	0.461973	0.461808	0.461636
																				0.464436	0.464472	0.464461	0.46443	0.464388	0.464336	0.464277	0.464213	0.464144	0.46407	0.463991	0.463909	0.463823	0.463732	0.463639	0.463541	0.46344	0.463335	0.463226	0.463114	0.462997	0.462876	0.462751	0.462622	0.462487	0.462348	0.462203	0.462053	0.461897	0.461735
																				0.46434	0.464387	0.464384	0.46436	0.464323	0.464277	0.464224	0.464165	0.4641	0.464031	0.463957	0.46388	0.463798	0.463713	0.463624	0.463532	0.463435	0.463336	0.463232	0.463125	0.463014	0.4629	0.462781	0.462658	0.46253	0.462398	0.462261	0.462119	0.461971	0.461818
																				0.46424	0.464297	0.464302	0.464285	0.464254	0.464213	0.464165	0.46411	0.464051	0.463986	0.463917	0.463844	0.463767	0.463686	0.463602	0.463514	0.463423	0.463328	0.46323	0.463128	0.463023	0.462914	0.462801	0.462684	0.462563	0.462437	0.462307	0.462173	0.462033	0.461888
																				0.464135	0.464204	0.464216	0.464204	0.464179	0.464144	0.4641	0.464051	0.463995	0.463935	0.46387	0.463802	0.463729	0.463653	0.463574	0.46349	0.463404	0.463314	0.463221	0.463124	0.463024	0.46292	0.462813	0.462702	0.462587	0.462469	0.462345	0.462218	0.462086	0.461949
																				0.464027	0.464106	0.464125	0.46412	0.4641	0.46407	0.464031	0.463986	0.463935	0.463879	0.463819	0.463755	0.463687	0.463615	0.46354	0.463461	0.463379	0.463294	0.463206	0.463114	0.463019	0.462921	0.462819	0.462714	0.462605	0.462493	0.462376	0.462256	0.462131	0.462002
																				0.463914	0.464003	0.46403	0.464031	0.464017	0.463991	0.463957	0.463917	0.46387	0.463819	0.463763	0.463703	0.46364	0.463572	0.463501	0.463427	0.46335	0.46327	0.463186	0.463099	0.46301	0.462917	0.46282	0.462721	0.462618	0.462512	0.462402	0.462288	0.46217	0.462048
																				0.463798	0.463897	0.463931	0.463938	0.463929	0.463909	0.46388	0.463844	0.463802	0.463755	0.463703	0.463648	0.463588	0.463525	0.463459	0.463389	0.463317	0.463241	0.463162	0.46308	0.462995	0.462908	0.462817	0.462723	0.462626	0.462525	0.462422	0.462314	0.462204	0.462089
																				0.463677	0.463787	0.463828	0.463842	0.463838	0.463823	0.463798	0.463767	0.463729	0.463687	0.46364	0.463588	0.463533	0.463475	0.463413	0.463347	0.463279	0.463208	0.463134	0.463057	0.462977	0.462895	0.462809	0.462721	0.462629	0.462535	0.462437	0.462337	0.462232	0.462125
																				0.463552	0.463673	0.463722	0.463741	0.463743	0.463732	0.463713	0.463686	0.463653	0.463615	0.463572	0.463525	0.463475	0.46342	0.463363	0.463302	0.463239	0.463172	0.463103	0.463031	0.462956	0.462878	0.462798	0.462715	0.46263	0.462541	0.462449	0.462355	0.462257	0.462156
																				0.463422	0.463555	0.463611	0.463637	0.463644	0.463639	0.463624	0.463602	0.463574	0.46354	0.463501	0.463459	0.463413	0.463363	0.46331	0.463254	0.463195	0.463133	0.463068	0.463001	0.462931	0.462859	0.462784	0.462706	0.462626	0.462543	0.462458	0.46237	0.462278	0.462184
																				0.463288	0.463432	0.463496	0.463528	0.463541	0.463541	0.463532	0.463514	0.46349	0.463461	0.463427	0.463389	0.463347	0.463302	0.463254	0.463202	0.463148	0.463091	0.463031	0.462969	0.462904	0.462837	0.462767	0.462695	0.46262	0.462543	0.462463	0.462381	0.462296	0.462209
																				0.463149	0.463305	0.463377	0.463416	0.463435	0.46344	0.463435	0.463423	0.463404	0.463379	0.46335	0.463317	0.463279	0.463239	0.463195	0.463148	0.463098	0.463046	0.462991	0.462933	0.462874	0.462812	0.462747	0.46268	0.462611	0.46254	0.462466	0.46239	0.462311	0.46223
																				0.463006	0.463174	0.463254	0.463299	0.463324	0.463335	0.463336	0.463328	0.463314	0.463294	0.46327	0.463241	0.463208	0.463172	0.463133	0.463091	0.463046	0.462998	0.462948	0.462896	0.462841	0.462784	0.462725	0.462664	0.4626	0.462534	0.462466	0.462396	0.462324	0.462249
																				0.462857	0.463038	0.463126	0.463179	0.46321	0.463226	0.463232	0.46323	0.463221	0.463206	0.463186	0.463162	0.463134	0.463103	0.463068	0.463031	0.462991	0.462948	0.462903	0.462856	0.462806	0.462754	0.4627	0.462644	0.462586	0.462526	0.462464	0.4624	0.462334	0.462265
																				0.462702	0.462896	0.462994	0.463054	0.463091	0.463114	0.463125	0.463128	0.463124	0.463114	0.463099	0.46308	0.463057	0.463031	0.463001	0.462969	0.462933	0.462896	0.462856	0.462813	0.462769	0.462722	0.462674	0.462623	0.462571	0.462516	0.46246	0.462402	0.462342	0.462279
																				0.462542	0.46275	0.462857	0.462924	0.462969	0.462997	0.463014	0.463023	0.463024	0.463019	0.46301	0.462995	0.462977	0.462956	0.462931	0.462904	0.462874	0.462841	0.462806	0.462769	0.46273	0.462688	0.462645	0.4626	0.462553	0.462504	0.462454	0.462401	0.462347	0.462291
																				0.462376	0.462598	0.462715	0.46279	0.462841	0.462876	0.4629	0.462914	0.46292	0.462921	0.462917	0.462908	0.462895	0.462878	0.462859	0.462837	0.462812	0.462784	0.462754	0.462722	0.462688	0.462653	0.462615	0.462575	0.462534	0.462491	0.462446	0.462399	0.462351	0.462301
																				0.462204	0.462441	0.462568	0.462651	0.462709	0.462751	0.462781	0.462801	0.462813	0.462819	0.46282	0.462817	0.462809	0.462798	0.462784	0.462767	0.462747	0.462725	0.4627	0.462674	0.462645	0.462615	0.462582	0.462548	0.462513	0.462475	0.462436	0.462395	0.462353	0.462309
																				0.462024	0.462277	0.462415	0.462507	0.462573	0.462622	0.462658	0.462684	0.462702	0.462714	0.462721	0.462723	0.462721	0.462715	0.462706	0.462695	0.46268	0.462664	0.462644	0.462623	0.4626	0.462575	0.462548	0.46252	0.46249	0.462458	0.462425	0.46239	0.462354	0.462316
																				0.461838	0.462107	0.462256	0.462357	0.462431	0.462487	0.46253	0.462563	0.462587	0.462605	0.462618	0.462626	0.462629	0.46263	0.462626	0.46262	0.462611	0.4626	0.462586	0.462571	0.462553	0.462534	0.462513	0.46249	0.462465	0.462439	0.462412	0.462383	0.462352	0.462321
																				0.461644	0.46193	0.462091	0.462202	0.462284	0.462348	0.462398	0.462437	0.462469	0.462493	0.462512	0.462525	0.462535	0.462541	0.462543	0.462543	0.46254	0.462534	0.462526	0.462516	0.462504	0.462491	0.462475	0.462458	0.462439	0.462419	0.462397	0.462374	0.46235	0.462324
																				0.461441	0.461746	0.461919	0.46204	0.462131	0.462203	0.462261	0.462307	0.462345	0.462376	0.462402	0.462422	0.462437	0.462449	0.462458	0.462463	0.462466	0.462466	0.462464	0.46246	0.462454	0.462446	0.462436	0.462425	0.462412	0.462397	0.462381	0.462364	0.462346	0.462326
																				0.461231	0.461555	0.46174	0.461872	0.461973	0.462053	0.462119	0.462173	0.462218	0.462256	0.462288	0.462314	0.462337	0.462355	0.46237	0.462381	0.46239	0.462396	0.4624	0.462402	0.462401	0.462399	0.462395	0.46239	0.462383	0.462374	0.462364	0.462353	0.46234	0.462327
																				0.46101	0.461355	0.461554	0.461697	0.461808	0.461897	0.461971	0.462033	0.462086	0.462131	0.46217	0.462204	0.462232	0.462257	0.462278	0.462296	0.462311	0.462324	0.462334	0.462342	0.462347	0.462351	0.462353	0.462354	0.462352	0.46235	0.462346	0.46234	0.462334	0.462326
																				0.46078	0.461146	0.46136	0.461515	0.461636	0.461735	0.461818	0.461888	0.461949	0.462002	0.462048	0.462089	0.462125	0.462156	0.462184	0.462209	0.46223	0.462249	0.462265	0.462279	0.462291	0.462301	0.462309	0.462316	0.462321	0.462324	0.462326	0.462327	0.462326	0.462324
																				0.460539	0.460928	0.461157	0.461325	0.461458	0.461567	0.461659	0.461738	0.461807	0.461868	0.461922	0.46197	0.462013	0.462052	0.462087	0.462118	0.462147	0.462172	0.462195	0.462215	0.462233	0.46225	0.462264	0.462277	0.462288	0.462297	0.462305	0.462312	0.462317	0.462321
																				0.460287	0.4607	0.460946	0.461127	0.461272	0.461391	0.461493	0.461582	0.46166	0.461729	0.461792	0.461848	0.461898	0.461945	0.461987	0.462025	0.46206	0.462093	0.462122	0.462149	0.462174	0.462196	0.462217	0.462236	0.462253	0.462269	0.462283	0.462295	0.462307	0.462316
																				0.460022	0.46046	0.460724	0.46092	0.461077	0.461208	0.461321	0.46142	0.461507	0.461585	0.461656	0.461721	0.461779	0.461833	0.461883	0.461929	0.461971	0.462011	0.462047	0.462081	0.462112	0.462142	0.462169	0.462194	0.462217	0.462239	0.462259	0.462278	0.462295	0.462311
																				0.459744	0.46021	0.460492	0.460704	0.460874	0.461018	0.461142	0.461251	0.461348	0.461436	0.461516	0.461589	0.461656	0.461719	0.461776	0.46183	0.46188	0.461926	0.46197	0.462011	0.462049	0.462085	0.462119	0.46215	0.46218	0.462208	0.462235	0.462259	0.462283	0.462305
																				0.459451	0.459947	0.460249	0.460477	0.460662	0.460819	0.460955	0.461075	0.461183	0.461281	0.46137	0.461453	0.461529	0.4616	0.461666	0.461727	0.461785	0.461839	0.46189	0.461938	0.461984	0.462026	0.462067	0.462105	0.462142	0.462176	0.462209	0.46224	0.462269	0.462297
																				0.459143	0.45967	0.459994	0.46024	0.46044	0.460611	0.460759	0.460892	0.461011	0.46112	0.461219	0.461311	0.461397	0.461477	0.461551	0.461621	0.461687	0.461749	0.461808	0.461864	0.461916	0.461966	0.462014	0.462059	0.462102	0.462143	0.462182	0.462219	0.462254	0.462288
																				0.458819	0.459378	0.459726	0.45999	0.460208	0.460393	0.460556	0.460701	0.460832	0.460952	0.461062	0.461165	0.46126	0.461349	0.461433	0.461512	0.461586	0.461657	0.461723	0.461787	0.461847	0.461904	0.461959	0.462011	0.46206	0.462108	0.462153	0.462197	0.462239	0.462279
																				0.458476	0.459071	0.459444	0.459729	0.459964	0.460165	0.460342	0.460501	0.460645	0.460777	0.460899	0.461013	0.461119	0.461218	0.461311	0.461399	0.461482	0.461561	0.461636	0.461708	0.461775	0.46184	0.461902	0.461961	0.462018	0.462072	0.462124	0.462174	0.462222	0.462268
																				0.458113	0.458747	0.459146	0.459453	0.459707	0.459926	0.460119	0.460293	0.460451	0.460596	0.46073	0.460855	0.460972	0.461081	0.461185	0.461282	0.461375	0.461463	0.461546	0.461626	0.461702	0.461774	0.461844	0.46191	0.461974	0.462035	0.462094	0.46215	0.462204	0.462257
																				0.457728	0.458404	0.458832	0.459163	0.459438	0.459676	0.459886	0.460075	0.460247	0.460406	0.460553	0.460691	0.460819	0.46094	0.461054	0.461162	0.461264	0.461361	0.461454	0.461542	0.461626	0.461707	0.461784	0.461857	0.461928	0.461996	0.462062	0.462125	0.462186	0.462244
																				0.45732	0.458041	0.458501	0.458857	0.459155	0.459412	0.459641	0.459847	0.460035	0.460209	0.46037	0.46052	0.460661	0.460794	0.460919	0.461037	0.46115	0.461256	0.461358	0.461455	0.461548	0.461637	0.461722	0.461803	0.461882	0.461957	0.462029	0.462099	0.462166	0.462231
																				0.456886	0.457656	0.45815	0.458535	0.458856	0.459136	0.459384	0.459608	0.459813	0.460003	0.460178	0.460343	0.460497	0.460642	0.460779	0.460908	0.461031	0.461148	0.46126	0.461366	0.461468	0.461565	0.461658	0.461747	0.461833	0.461916	0.461995	0.462071	0.462145	0.462216
																				0.456424	0.457247	0.457778	0.458193	0.458541	0.458844	0.459114	0.459358	0.459581	0.459787	0.459979	0.460158	0.460326	0.460484	0.460633	0.460775	0.460909	0.461037	0.461158	0.461274	0.461385	0.461491	0.461593	0.46169	0.461784	0.461873	0.46196	0.462043	0.462123	0.462201
																				0.455932	0.456812	0.457383	0.457832	0.458209	0.458537	0.45883	0.459095	0.459338	0.459562	0.459771	0.459966	0.460149	0.460321	0.460483	0.460637	0.460783	0.460922	0.461054	0.46118	0.4613	0.461415	0.461525	0.461631	0.461732	0.46183	0.461923	0.462014	0.462101	0.462184
																				0.455405	0.456349	0.456964	0.457449	0.457857	0.458213	0.458531	0.458819	0.459083	0.459327	0.459554	0.459766	0.459964	0.460151	0.460327	0.460494	0.460653	0.460803	0.460946	0.461083	0.461213	0.461337	0.461456	0.46157	0.46168	0.461785	0.461886	0.461983	0.462077	0.462167
																				0.454842	0.455854	0.456518	0.457042	0.457485	0.457871	0.458217	0.45853	0.458816	0.459081	0.459327	0.459557	0.459772	0.459975	0.460166	0.460347	0.460518	0.460681	0.460835	0.460982	0.461123	0.461257	0.461385	0.461508	0.461626	0.461739	0.461847	0.461952	0.462052	0.462149
																				0.454237	0.455325	0.456042	0.45661	0.45709	0.45751	0.457885	0.458225	0.458536	0.458824	0.459091	0.45934	0.459573	0.459792	0.459999	0.460194	0.460379	0.460554	0.460721	0.460879	0.46103	0.461174	0.461312	0.461444	0.46157	0.461691	0.461807	0.461919	0.462026	0.46213
																				0.453587	0.454758	0.455534	0.45615	0.456671	0.457127	0.457535	0.457904	0.458242	0.458554	0.458844	0.459113	0.459366	0.459603	0.459826	0.460036	0.460236	0.460424	0.460603	0.460773	0.460935	0.46109	0.461237	0.461378	0.461513	0.461642	0.461766	0.461886	0.462	0.46211
																				0.452886	0.45415	0.45499	0.455659	0.456226	0.456722	0.457165	0.457567	0.457934	0.458272	0.458585	0.458877	0.45915	0.459406	0.459647	0.459873	0.460087	0.46029	0.460482	0.460664	0.460838	0.461003	0.461161	0.461311	0.461455	0.461592	0.461724	0.461851	0.461972	0.462089
																				0.452129	0.453495	0.454408	0.455136	0.455753	0.456293	0.456775	0.457211	0.457609	0.457976	0.458316	0.458631	0.458926	0.459202	0.459461	0.459705	0.459935	0.460152	0.460358	0.460553	0.460738	0.460914	0.461082	0.461242	0.461395	0.461541	0.461681	0.461815	0.461944	0.462068
																				0.45131	0.45279	0.453784	0.454577	0.455249	0.455837	0.456362	0.456836	0.457269	0.457666	0.458034	0.458375	0.458693	0.45899	0.459269	0.45953	0.459777	0.46001	0.46023	0.460438	0.460635	0.460823	0.461002	0.461172	0.461334	0.461489	0.461637	0.461779	0.461915	0.462045
																				0.450422	0.452029	0.453112	0.453978	0.454712	0.455353	0.455925	0.456441	0.456911	0.457342	0.457739	0.458108	0.458451	0.45877	0.45907	0.459351	0.459615	0.459863	0.460098	0.46032	0.46053	0.46073	0.460919	0.4611	0.461271	0.461435	0.461592	0.461741	0.461885	0.462022
																				0.449455	0.451205	0.452389	0.453336	0.454138	0.454839	0.455462	0.456024	0.456534	0.457001	0.457432	0.45783	0.458199	0.458543	0.458864	0.459165	0.459448	0.459713	0.459963	0.4602	0.460423	0.460635	0.460836	0.461026	0.461208	0.461381	0.461546	0.461703	0.461854	0.461998
																				0.4484	0.450312	0.451609	0.452647	0.453526	0.454292	0.454972	0.455584	0.456138	0.456645	0.45711	0.45754	0.457938	0.458307	0.458652	0.458974	0.459276	0.459559	0.459825	0.460076	0.460313	0.460538	0.46075	0.460951	0.461143	0.461325	0.461499	0.461664	0.461822	0.461973
																				0.447247	0.449342	0.450767	0.451907	0.452871	0.45371	0.454453	0.455119	0.455722	0.456272	0.456775	0.457238	0.457667	0.458064	0.458433	0.458777	0.459099	0.459401	0.459684	0.45995	0.460202	0.460439	0.460663	0.460875	0.461077	0.461268	0.461451	0.461624	0.46179	0.461948
																				0.445981	0.448284	0.449855	0.451111	0.452171	0.453091	0.453903	0.45463	0.455285	0.455881	0.456425	0.456925	0.457386	0.457812	0.458207	0.458575	0.458918	0.459239	0.45954	0.459822	0.460088	0.460338	0.460574	0.460798	0.46101	0.461211	0.461402	0.461584	0.461757	0.461922
																				0.444587	0.447129	0.448867	0.450253	0.451421	0.452431	0.45332	0.454113	0.454827	0.455473	0.456061	0.4566	0.457095	0.457552	0.457975	0.458367	0.458733	0.459074	0.459392	0.459691	0.459972	0.460236	0.460485	0.46072	0.460942	0.461153	0.461353	0.461543	0.461724	0.461896
																				0.443048	0.445865	0.447793	0.449328	0.450617	0.451728	0.452703	0.453569	0.454345	0.455046	0.455682	0.456263	0.456795	0.457285	0.457736	0.458155	0.458543	0.458905	0.459243	0.459558	0.459854	0.460132	0.460394	0.460641	0.460874	0.461094	0.461303	0.461501	0.46169	0.461869
																				0.441342	0.444479	0.446625	0.44833	0.449756	0.45098	0.45205	0.452996	0.453841	0.454601	0.455289	0.455914	0.456485	0.457009	0.457492	0.457937	0.45835	0.458733	0.45909	0.459424	0.459735	0.460028	0.460302	0.460561	0.460805	0.461035	0.461253	0.46146	0.461656	0.461842
																				0.439443	0.442952	0.445352	0.447252	0.448832	0.450184	0.451359	0.452394	0.453314	0.454138	0.454881	0.455554	0.456167	0.456727	0.457242	0.457716	0.458154	0.458559	0.458936	0.459288	0.459616	0.459922	0.46021	0.460481	0.460736	0.460976	0.461203	0.461418	0.461621	0.461815
																				0.437321	0.441268	0.443963	0.446085	0.447843	0.449336	0.450629	0.451761	0.452763	0.453657	0.454459	0.455183	0.45584	0.456439	0.456987	0.45749	0.457954	0.458383	0.458781	0.45915	0.459495	0.459817	0.460118	0.4604	0.460666	0.460916	0.461153	0.461376	0.461587	0.461787
																				0.434937	0.439404	0.442444	0.444824	0.446782	0.448436	0.449859	0.451098	0.45219	0.453158	0.454023	0.454802	0.455506	0.456145	0.456728	0.457262	0.457753	0.458206	0.458624	0.459013	0.459374	0.459711	0.460025	0.46032	0.460597	0.460857	0.461102	0.461334	0.461553	0.46176
																				0.432244	0.437333	0.44078	0.44346	0.445647	0.447482	0.449049	0.450406	0.451594	0.452643	0.453576	0.454412	0.455165	0.455846	0.456466	0.457032	0.45755	0.458027	0.458467	0.458875	0.459253	0.459605	0.459933	0.46024	0.460528	0.460798	0.461052	0.461292	0.461518	0.461732
																				0.42918	0.435026	0.438957	0.441986	0.444435	0.446473	0.4482	0.449685	0.450978	0.452113	0.453118	0.454015	0.454819	0.455544	0.456201	0.4568	0.457347	0.457849	0.458311	0.458738	0.459133	0.4595	0.459842	0.460161	0.46046	0.46074	0.461003	0.461251	0.461484	0.461705
																				0.425671	0.432448	0.436961	0.440396	0.443145	0.445409	0.447313	0.448938	0.450343	0.45157	0.452652	0.453611	0.454469	0.455239	0.455936	0.456568	0.457144	0.457671	0.458155	0.458601	0.459014	0.459396	0.459752	0.460083	0.460393	0.460683	0.460955	0.46121	0.461451	0.461678
																				0.421635	0.42957	0.43478	0.438689	0.441777	0.444294	0.446391	0.448168	0.449693	0.451018	0.452179	0.453204	0.454117	0.454934	0.45567	0.456337	0.456942	0.457495	0.458001	0.458467	0.458897	0.459294	0.459663	0.460007	0.460327	0.460626	0.460907	0.46117	0.461418	0.461652
																				0.416992	0.426369	0.432409	0.436864	0.440335	0.443132	0.445439	0.447378	0.449031	0.450458	0.451702	0.452796	0.453766	0.454631	0.455407	0.456108	0.456743	0.457321	0.45785	0.458335	0.458782	0.459195	0.459577	0.459932	0.460263	0.460572	0.460861	0.461132	0.461386	0.461626
																				0.411689	0.422832	0.429849	0.434928	0.438826	0.441928	0.444463	0.446574	0.448362	0.449896	0.451225	0.45239	0.453417	0.454331	0.455148	0.455883	0.456548	0.457152	0.457703	0.458207	0.458671	0.459098	0.459493	0.45986	0.460201	0.460519	0.460816	0.461094	0.461356	0.461601
																				0.405658	0.418933	0.427093	0.432883	0.437256	0.440692	0.443469	0.445763	0.447691	0.449334	0.450752	0.451988	0.453074	0.454036	0.454894	0.455664	0.456358	0.456987	0.45756	0.458083	0.458563	0.459005	0.459413	0.45979	0.460141	0.460468	0.460773	0.461058	0.461326	0.461577
																				0.39843	0.414557	0.42412	0.430733	0.435634	0.439431	0.442466	0.444951	0.447024	0.44878	0.450287	0.451594	0.452739	0.45375	0.454648	0.455452	0.456175	0.456829	0.457422	0.457964	0.45846	0.458916	0.459336	0.459724	0.460085	0.46042	0.460732	0.461024	0.461298	0.461555
																				0.389144	0.409594	0.420922	0.428487	0.433975	0.43816	0.441466	0.444147	0.446367	0.448237	0.449834	0.451213	0.452416	0.453474	0.454412	0.455249	0.456	0.456678	0.457292	0.457851	0.458362	0.458831	0.459263	0.459662	0.460031	0.460374	0.460694	0.460992	0.461271	0.461533
																				0.379299	0.404224	0.417532	0.426172	0.4323	0.436895	0.440481	0.443362	0.44573	0.447713	0.449398	0.450847	0.452107	0.453212	0.454188	0.455057	0.455835	0.456536	0.457169	0.457745	0.458271	0.458752	0.459195	0.459603	0.459981	0.460332	0.460658	0.460962	0.461247	0.461513
																				0.362116	0.397655	0.413907	0.423826	0.430642	0.43566	0.439526	0.442606	0.445121	0.447214	0.448985	0.450503	0.451817	0.452966	0.453979	0.454878	0.455682	0.456404	0.457056	0.457647	0.458186	0.45868	0.459132	0.45955	0.459935	0.460293	0.460625	0.460935	0.461224	0.461495
																				0.347237	0.391419	0.410417	0.421564	0.429048	0.434477	0.438618	0.441891	0.444547	0.446747	0.448601	0.450183	0.451549	0.45274	0.453787	0.454714	0.455542	0.456283	0.456952	0.457558	0.45811	0.458614	0.459076	0.459501	0.459894	0.460258	0.460595	0.46091	0.461204	0.461478
																				0.332393	0.385989	0.407179	0.419421	0.427539	0.433365	0.43777	0.441228	0.444019	0.44632	0.44825	0.449892	0.451306	0.452535	0.453614	0.454567	0.455416	0.456176	0.45686	0.457479	0.458042	0.458555	0.459026	0.459458	0.459857	0.460226	0.460569	0.460888	0.461185	0.461464
																				0.2117	0.375684	0.403349	0.417268	0.426108	0.432337	0.436998	0.44063	0.443545	0.445938	0.447939	0.449636	0.451092	0.452356	0.453463	0.454439	0.455307	0.456083	0.45678	0.45741	0.457983	0.458504	0.458982	0.459421	0.459825	0.460199	0.460546	0.460869	0.46117	0.461451
																				0.19103	0.368846	0.400017	0.415311	0.424819	0.431424	0.43632	0.44011	0.443137	0.445612	0.447674	0.449418	0.450912	0.452205	0.453336	0.454332	0.455215	0.456004	0.456713	0.457353	0.457933	0.458462	0.458946	0.45939	0.459799	0.460177	0.460528	0.460853	0.461157	0.46144
																				0.183155	0.363984	0.397427	0.413714	0.423751	0.430667	0.435761	0.439684	0.442804	0.445347	0.44746	0.449243	0.450767	0.452085	0.453234	0.454246	0.455143	0.455942	0.45666	0.457308	0.457895	0.458429	0.458917	0.459366	0.459778	0.46016	0.460513	0.460841	0.461147	0.461432
																				0.179319	0.360719	0.395607	0.412553	0.422959	0.430102	0.435344	0.439368	0.442559	0.445153	0.447303	0.449115	0.450662	0.451997	0.453161	0.454184	0.45509	0.455898	0.456622	0.457275	0.457866	0.458405	0.458897	0.459348	0.459763	0.460147	0.460502	0.460832	0.461139	0.461426
																				0.177447	0.358836	0.39453	0.411853	0.422475	0.429755	0.435087	0.439173	0.442407	0.445033	0.447207	0.449037	0.450597	0.451943	0.453116	0.454146	0.455058	0.45587	0.456599	0.457255	0.45785	0.45839	0.458884	0.459337	0.459754	0.460139	0.460496	0.460827	0.461135	0.461423
																				0.176878	0.35822	0.394174	0.41162	0.422312	0.429637	0.435	0.439107	0.442356	0.444993	0.447175	0.449011	0.450576	0.451926	0.453101	0.454133	0.455047	0.455861	0.456591	0.457248	0.457844	0.458385	0.45888	0.459334	0.459751	0.460137	0.460493	0.460825	0.461133	0.461421
																				0.177447	0.358836	0.39453	0.411853	0.422475	0.429755	0.435087	0.439173	0.442407	0.445033	0.447207	0.449037	0.450597	0.451943	0.453116	0.454146	0.455058	0.45587	0.456599	0.457255	0.45785	0.45839	0.458884	0.459337	0.459754	0.460139	0.460496	0.460827	0.461135	0.461423
																				0.179319	0.360719	0.395607	0.412553	0.422959	0.430102	0.435344	0.439368	0.442559	0.445153	0.447303	0.449115	0.450662	0.451997	0.453161	0.454184	0.45509	0.455898	0.456622	0.457275	0.457866	0.458405	0.458897	0.459348	0.459763	0.460147	0.460502	0.460832	0.461139	0.461426
																				0.183155	0.363984	0.397427	0.413714	0.423751	0.430667	0.435761	0.439684	0.442804	0.445347	0.44746	0.449243	0.450767	0.452085	0.453234	0.454246	0.455143	0.455942	0.45666	0.457308	0.457895	0.458429	0.458917	0.459366	0.459778	0.46016	0.460513	0.460841	0.461147	0.461432
																				0.19103	0.368846	0.400017	0.415311	0.424819	0.431424	0.43632	0.44011	0.443137	0.445612	0.447674	0.449418	0.450912	0.452205	0.453336	0.454332	0.455215	0.456004	0.456713	0.457353	0.457933	0.458462	0.458946	0.45939	0.459799	0.460177	0.460528	0.460853	0.461157	0.46144
																				0.2117	0.375684	0.403349	0.417268	0.426108	0.432337	0.436998	0.44063	0.443545	0.445938	0.447939	0.449636	0.451092	0.452356	0.453463	0.454439	0.455307	0.456083	0.45678	0.45741	0.457983	0.458504	0.458982	0.459421	0.459825	0.460199	0.460546	0.460869	0.46117	0.461451
																				0.332393	0.385989	0.407179	0.419421	0.427539	0.433365	0.43777	0.441228	0.444019	0.44632	0.44825	0.449892	0.451306	0.452535	0.453614	0.454567	0.455416	0.456176	0.45686	0.457479	0.458042	0.458555	0.459026	0.459458	0.459857	0.460226	0.460569	0.460888	0.461185	0.461464
																				0.347237	0.391419	0.410417	0.421564	0.429048	0.434477	0.438618	0.441891	0.444547	0.446747	0.448601	0.450183	0.451549	0.45274	0.453787	0.454714	0.455542	0.456283	0.456952	0.457558	0.45811	0.458614	0.459076	0.459501	0.459894	0.460258	0.460595	0.46091	0.461204	0.461478
																				0.362116	0.397655	0.413907	0.423826	0.430642	0.43566	0.439526	0.442606	0.445121	0.447214	0.448985	0.450503	0.451817	0.452966	0.453979	0.454878	0.455682	0.456404	0.457056	0.457647	0.458186	0.45868	0.459132	0.45955	0.459935	0.460293	0.460625	0.460935	0.461224	0.461495
																				0.379299	0.404224	0.417532	0.426172	0.4323	0.436895	0.440481	0.443362	0.44573	0.447713	0.449398	0.450847	0.452107	0.453212	0.454188	0.455057	0.455835	0.456536	0.457169	0.457745	0.458271	0.458752	0.459195	0.459603	0.459981	0.460332	0.460658	0.460962	0.461247	0.461513
																				0.389144	0.409594	0.420922	0.428487	0.433975	0.43816	0.441466	0.444147	0.446367	0.448237	0.449834	0.451213	0.452416	0.453474	0.454412	0.455249	0.456	0.456678	0.457292	0.457851	0.458362	0.458831	0.459263	0.459662	0.460031	0.460374	0.460694	0.460992	0.461271	0.461533
																				0.39843	0.414557	0.42412	0.430733	0.435634	0.439431	0.442466	0.444951	0.447024	0.44878	0.450287	0.451594	0.452739	0.45375	0.454648	0.455452	0.456175	0.456829	0.457422	0.457964	0.45846	0.458916	0.459336	0.459724	0.460085	0.46042	0.460732	0.461024	0.461298	0.461555
																				0.405658	0.418933	0.427093	0.432883	0.437256	0.440692	0.443469	0.445763	0.447691	0.449334	0.450752	0.451988	0.453074	0.454036	0.454894	0.455664	0.456358	0.456987	0.45756	0.458083	0.458563	0.459005	0.459413	0.45979	0.460141	0.460468	0.460773	0.461058	0.461326	0.461577
																				0.411689	0.422832	0.429849	0.434928	0.438826	0.441928	0.444463	0.446574	0.448362	0.449896	0.451225	0.45239	0.453417	0.454331	0.455148	0.455883	0.456548	0.457152	0.457703	0.458207	0.458671	0.459098	0.459493	0.45986	0.460201	0.460519	0.460816	0.461094	0.461356	0.461601
																				0.416992	0.426369	0.432409	0.436864	0.440335	0.443132	0.445439	0.447378	0.449031	0.450458	0.451702	0.452796	0.453766	0.454631	0.455407	0.456108	0.456743	0.457321	0.45785	0.458335	0.458782	0.459195	0.459577	0.459932	0.460263	0.460572	0.460861	0.461132	0.461386	0.461626
																				0.421635	0.42957	0.43478	0.438689	0.441777	0.444294	0.446391	0.448168	0.449693	0.451018	0.452179	0.453204	0.454117	0.454934	0.45567	0.456337	0.456942	0.457495	0.458001	0.458467	0.458897	0.459294	0.459663	0.460007	0.460327	0.460626	0.460907	0.46117	0.461418	0.461652
																				0.425671	0.432448	0.436961	0.440396	0.443145	0.445409	0.447313	0.448938	0.450343	0.45157	0.452652	0.453611	0.454469	0.455239	0.455936	0.456568	0.457144	0.457671	0.458155	0.458601	0.459014	0.459396	0.459752	0.460083	0.460393	0.460683	0.460955	0.46121	0.461451	0.461678
																				0.42918	0.435026	0.438957	0.441986	0.444435	0.446473	0.4482	0.449685	0.450978	0.452113	0.453118	0.454015	0.454819	0.455544	0.456201	0.4568	0.457347	0.457849	0.458311	0.458738	0.459133	0.4595	0.459842	0.460161	0.46046	0.46074	0.461003	0.461251	0.461484	0.461705
																				0.432244	0.437333	0.44078	0.44346	0.445647	0.447482	0.449049	0.450406	0.451594	0.452643	0.453576	0.454412	0.455165	0.455846	0.456466	0.457032	0.45755	0.458027	0.458467	0.458875	0.459253	0.459605	0.459933	0.46024	0.460528	0.460798	0.461052	0.461292	0.461518	0.461732
																				0.434937	0.439404	0.442444	0.444824	0.446782	0.448436	0.449859	0.451098	0.45219	0.453158	0.454023	0.454802	0.455506	0.456145	0.456728	0.457262	0.457753	0.458206	0.458624	0.459013	0.459374	0.459711	0.460025	0.46032	0.460597	0.460857	0.461102	0.461334	0.461553	0.46176
																				0.437321	0.441268	0.443963	0.446085	0.447843	0.449336	0.450629	0.451761	0.452763	0.453657	0.454459	0.455183	0.45584	0.456439	0.456987	0.45749	0.457954	0.458383	0.458781	0.45915	0.459495	0.459817	0.460118	0.4604	0.460666	0.460916	0.461153	0.461376	0.461587	0.461787
																				0.439443	0.442952	0.445352	0.447252	0.448832	0.450184	0.451359	0.452394	0.453314	0.454138	0.454881	0.455554	0.456167	0.456727	0.457242	0.457716	0.458154	0.458559	0.458936	0.459288	0.459616	0.459922	0.46021	0.460481	0.460736	0.460976	0.461203	0.461418	0.461621	0.461815
																				0.441342	0.444479	0.446625	0.44833	0.449756	0.45098	0.45205	0.452996	0.453841	0.454601	0.455289	0.455914	0.456485	0.457009	0.457492	0.457937	0.45835	0.458733	0.45909	0.459424	0.459735	0.460028	0.460302	0.460561	0.460805	0.461035	0.461253	0.46146	0.461656	0.461842
																				0.443048	0.445865	0.447793	0.449328	0.450617	0.451728	0.452703	0.453569	0.454345	0.455046	0.455682	0.456263	0.456795	0.457285	0.457736	0.458155	0.458543	0.458905	0.459243	0.459558	0.459854	0.460132	0.460394	0.460641	0.460874	0.461094	0.461303	0.461501	0.46169	0.461869
																				0.444587	0.447129	0.448867	0.450253	0.451421	0.452431	0.45332	0.454113	0.454827	0.455473	0.456061	0.4566	0.457095	0.457552	0.457975	0.458367	0.458733	0.459074	0.459392	0.459691	0.459972	0.460236	0.460485	0.46072	0.460942	0.461153	0.461353	0.461543	0.461724	0.461896
																				0.445981	0.448284	0.449855	0.451111	0.452171	0.453091	0.453903	0.45463	0.455285	0.455881	0.456425	0.456925	0.457386	0.457812	0.458207	0.458575	0.458918	0.459239	0.45954	0.459822	0.460088	0.460338	0.460574	0.460798	0.46101	0.461211	0.461402	0.461584	0.461757	0.461922
																				0.447247	0.449342	0.450767	0.451907	0.452871	0.45371	0.454453	0.455119	0.455722	0.456272	0.456775	0.457238	0.457667	0.458064	0.458433	0.458777	0.459099	0.459401	0.459684	0.45995	0.460202	0.460439	0.460663	0.460875	0.461077	0.461268	0.461451	0.461624	0.46179	0.461948
																				0.4484	0.450312	0.451609	0.452647	0.453526	0.454292	0.454972	0.455584	0.456138	0.456645	0.45711	0.45754	0.457938	0.458307	0.458652	0.458974	0.459276	0.459559	0.459825	0.460076	0.460313	0.460538	0.46075	0.460951	0.461143	0.461325	0.461499	0.461664	0.461822	0.461973
																				0.449455	0.451205	0.452389	0.453336	0.454138	0.454839	0.455462	0.456024	0.456534	0.457001	0.457432	0.45783	0.458199	0.458543	0.458864	0.459165	0.459448	0.459713	0.459963	0.4602	0.460423	0.460635	0.460836	0.461026	0.461208	0.461381	0.461546	0.461703	0.461854	0.461998
																				0.450422	0.452029	0.453112	0.453978	0.454712	0.455353	0.455925	0.456441	0.456911	0.457342	0.457739	0.458108	0.458451	0.45877	0.45907	0.459351	0.459615	0.459863	0.460098	0.46032	0.46053	0.46073	0.460919	0.4611	0.461271	0.461435	0.461592	0.461741	0.461885	0.462022
																				0.45131	0.45279	0.453784	0.454577	0.455249	0.455837	0.456362	0.456836	0.457269	0.457666	0.458034	0.458375	0.458693	0.45899	0.459269	0.45953	0.459777	0.46001	0.46023	0.460438	0.460635	0.460823	0.461002	0.461172	0.461334	0.461489	0.461637	0.461779	0.461915	0.462045
																				0.452129	0.453495	0.454408	0.455136	0.455753	0.456293	0.456775	0.457211	0.457609	0.457976	0.458316	0.458631	0.458926	0.459202	0.459461	0.459705	0.459935	0.460152	0.460358	0.460553	0.460738	0.460914	0.461082	0.461242	0.461395	0.461541	0.461681	0.461815	0.461944	0.462068
																				0.452886	0.45415	0.45499	0.455659	0.456226	0.456722	0.457165	0.457567	0.457934	0.458272	0.458585	0.458877	0.45915	0.459406	0.459647	0.459873	0.460087	0.46029	0.460482	0.460664	0.460838	0.461003	0.461161	0.461311	0.461455	0.461592	0.461724	0.461851	0.461972	0.462089
																				0.453587	0.454758	0.455534	0.45615	0.456671	0.457127	0.457535	0.457904	0.458242	0.458554	0.458844	0.459113	0.459366	0.459603	0.459826	0.460036	0.460236	0.460424	0.460603	0.460773	0.460935	0.46109	0.461237	0.461378	0.461513	0.461642	0.461766	0.461886	0.462	0.46211
																				0.454237	0.455325	0.456042	0.45661	0.45709	0.45751	0.457885	0.458225	0.458536	0.458824	0.459091	0.45934	0.459573	0.459792	0.459999	0.460194	0.460379	0.460554	0.460721	0.460879	0.46103	0.461174	0.461312	0.461444	0.46157	0.461691	0.461807	0.461919	0.462026	0.46213
																				0.454842	0.455854	0.456518	0.457042	0.457485	0.457871	0.458217	0.45853	0.458816	0.459081	0.459327	0.459557	0.459772	0.459975	0.460166	0.460347	0.460518	0.460681	0.460835	0.460982	0.461123	0.461257	0.461385	0.461508	0.461626	0.461739	0.461847	0.461952	0.462052	0.462149
																				0.455405	0.456349	0.456964	0.457449	0.457857	0.458213	0.458531	0.458819	0.459083	0.459327	0.459554	0.459766	0.459964	0.460151	0.460327	0.460494	0.460653	0.460803	0.460946	0.461083	0.461213	0.461337	0.461456	0.46157	0.46168	0.461785	0.461886	0.461983	0.462077	0.462167
																				0.455932	0.456812	0.457383	0.457832	0.458209	0.458537	0.45883	0.459095	0.459338	0.459562	0.459771	0.459966	0.460149	0.460321	0.460483	0.460637	0.460783	0.460922	0.461054	0.46118	0.4613	0.461415	0.461525	0.461631	0.461732	0.46183	0.461923	0.462014	0.462101	0.462184
																				0.456424	0.457247	0.457778	0.458193	0.458541	0.458844	0.459114	0.459358	0.459581	0.459787	0.459979	0.460158	0.460326	0.460484	0.460633	0.460775	0.460909	0.461037	0.461158	0.461274	0.461385	0.461491	0.461593	0.46169	0.461784	0.461873	0.46196	0.462043	0.462123	0.462201
																				0.456886	0.457656	0.45815	0.458535	0.458856	0.459136	0.459384	0.459608	0.459813	0.460003	0.460178	0.460343	0.460497	0.460642	0.460779	0.460908	0.461031	0.461148	0.46126	0.461366	0.461468	0.461565	0.461658	0.461747	0.461833	0.461916	0.461995	0.462071	0.462145	0.462216
																				0.45732	0.458041	0.458501	0.458857	0.459155	0.459412	0.459641	0.459847	0.460035	0.460209	0.46037	0.46052	0.460661	0.460794	0.460919	0.461037	0.46115	0.461256	0.461358	0.461455	0.461548	0.461637	0.461722	0.461803	0.461882	0.461957	0.462029	0.462099	0.462166	0.462231
																				0.457728	0.458404	0.458832	0.459163	0.459438	0.459676	0.459886	0.460075	0.460247	0.460406	0.460553	0.460691	0.460819	0.46094	0.461054	0.461162	0.461264	0.461361	0.461454	0.461542	0.461626	0.461707	0.461784	0.461857	0.461928	0.461996	0.462062	0.462125	0.462186	0.462244
																				0.458113	0.458747	0.459146	0.459453	0.459707	0.459926	0.460119	0.460293	0.460451	0.460596	0.46073	0.460855	0.460972	0.461081	0.461185	0.461282	0.461375	0.461463	0.461546	0.461626	0.461702	0.461774	0.461844	0.46191	0.461974	0.462035	0.462094	0.46215	0.462204	0.462257
																				0.458476	0.459071	0.459444	0.459729	0.459964	0.460165	0.460342	0.460501	0.460645	0.460777	0.460899	0.461013	0.461119	0.461218	0.461311	0.461399	0.461482	0.461561	0.461636	0.461708	0.461775	0.46184	0.461902	0.461961	0.462018	0.462072	0.462124	0.462174	0.462222	0.462268
																				0.458819	0.459378	0.459726	0.45999	0.460208	0.460393	0.460556	0.460701	0.460832	0.460952	0.461062	0.461165	0.46126	0.461349	0.461433	0.461512	0.461586	0.461657	0.461723	0.461787	0.461847	0.461904	0.461959	0.462011	0.46206	0.462108	0.462153	0.462197	0.462239	0.462279
																				0.459143	0.45967	0.459994	0.46024	0.46044	0.460611	0.460759	0.460892	0.461011	0.46112	0.461219	0.461311	0.461397	0.461477	0.461551	0.461621	0.461687	0.461749	0.461808	0.461864	0.461916	0.461966	0.462014	0.462059	0.462102	0.462143	0.462182	0.462219	0.462254	0.462288
																				0.459451	0.459947	0.460249	0.460477	0.460662	0.460819	0.460955	0.461075	0.461183	0.461281	0.46137	0.461453	0.461529	0.4616	0.461666	0.461727	0.461785	0.461839	0.46189	0.461938	0.461984	0.462026	0.462067	0.462105	0.462142	0.462176	0.462209	0.46224	0.462269	0.462297
																				0.459744	0.46021	0.460492	0.460704	0.460874	0.461018	0.461142	0.461251	0.461348	0.461436	0.461516	0.461589	0.461656	0.461719	0.461776	0.46183	0.46188	0.461926	0.46197	0.462011	0.462049	0.462085	0.462119	0.46215	0.46218	0.462208	0.462235	0.462259	0.462283	0.462305
																				0.460022	0.46046	0.460724	0.46092	0.461077	0.461208	0.461321	0.46142	0.461507	0.461585	0.461656	0.461721	0.461779	0.461833	0.461883	0.461929	0.461971	0.462011	0.462047	0.462081	0.462112	0.462142	0.462169	0.462194	0.462217	0.462239	0.462259	0.462278	0.462295	0.462311
																				0.460287	0.4607	0.460946	0.461127	0.461272	0.461391	0.461493	0.461582	0.46166	0.461729	0.461792	0.461848	0.461898	0.461945	0.461987	0.462025	0.46206	0.462093	0.462122	0.462149	0.462174	0.462196	0.462217	0.462236	0.462253	0.462269	0.462283	0.462295	0.462307	0.462316
																				0.460539	0.460928	0.461157	0.461325	0.461458	0.461567	0.461659	0.461738	0.461807	0.461868	0.461922	0.46197	0.462013	0.462052	0.462087	0.462118	0.462147	0.462172	0.462195	0.462215	0.462233	0.46225	0.462264	0.462277	0.462288	0.462297	0.462305	0.462312	0.462317	0.462321
																				0.46078	0.461146	0.46136	0.461515	0.461636	0.461735	0.461818	0.461888	0.461949	0.462002	0.462048	0.462089	0.462125	0.462156	0.462184	0.462209	0.46223	0.462249	0.462265	0.462279	0.462291	0.462301	0.462309	0.462316	0.462321	0.462324	0.462326	0.462327	0.462326	0.462324
																				0.46101	0.461355	0.461554	0.461697	0.461808	0.461897	0.461971	0.462033	0.462086	0.462131	0.46217	0.462204	0.462232	0.462257	0.462278	0.462296	0.462311	0.462324	0.462334	0.462342	0.462347	0.462351	0.462353	0.462354	0.462352	0.46235	0.462346	0.46234	0.462334	0.462326
																				0.461231	0.461555	0.46174	0.461872	0.461973	0.462053	0.462119	0.462173	0.462218	0.462256	0.462288	0.462314	0.462337	0.462355	0.46237	0.462381	0.46239	0.462396	0.4624	0.462402	0.462401	0.462399	0.462395	0.46239	0.462383	0.462374	0.462364	0.462353	0.46234	0.462327
																				0.461441	0.461746	0.461919	0.46204	0.462131	0.462203	0.462261	0.462307	0.462345	0.462376	0.462402	0.462422	0.462437	0.462449	0.462458	0.462463	0.462466	0.462466	0.462464	0.46246	0.462454	0.462446	0.462436	0.462425	0.462412	0.462397	0.462381	0.462364	0.462346	0.462326
																				0.461644	0.46193	0.462091	0.462202	0.462284	0.462348	0.462398	0.462437	0.462469	0.462493	0.462512	0.462525	0.462535	0.462541	0.462543	0.462543	0.46254	0.462534	0.462526	0.462516	0.462504	0.462491	0.462475	0.462458	0.462439	0.462419	0.462397	0.462374	0.46235	0.462324
																				0.461838	0.462107	0.462256	0.462357	0.462431	0.462487	0.46253	0.462563	0.462587	0.462605	0.462618	0.462626	0.462629	0.46263	0.462626	0.46262	0.462611	0.4626	0.462586	0.462571	0.462553	0.462534	0.462513	0.46249	0.462465	0.462439	0.462412	0.462383	0.462352	0.462321
																				0.462024	0.462277	0.462415	0.462507	0.462573	0.462622	0.462658	0.462684	0.462702	0.462714	0.462721	0.462723	0.462721	0.462715	0.462706	0.462695	0.46268	0.462664	0.462644	0.462623	0.4626	0.462575	0.462548	0.46252	0.46249	0.462458	0.462425	0.46239	0.462354	0.462316
																				0.462204	0.462441	0.462568	0.462651	0.462709	0.462751	0.462781	0.462801	0.462813	0.462819	0.46282	0.462817	0.462809	0.462798	0.462784	0.462767	0.462747	0.462725	0.4627	0.462674	0.462645	0.462615	0.462582	0.462548	0.462513	0.462475	0.462436	0.462395	0.462353	0.462309
																				0.462376	0.462598	0.462715	0.46279	0.462841	0.462876	0.4629	0.462914	0.46292	0.462921	0.462917	0.462908	0.462895	0.462878	0.462859	0.462837	0.462812	0.462784	0.462754	0.462722	0.462688	0.462653	0.462615	0.462575	0.462534	0.462491	0.462446	0.462399	0.462351	0.462301
																				0.462542	0.46275	0.462857	0.462924	0.462969	0.462997	0.463014	0.463023	0.463024	0.463019	0.46301	0.462995	0.462977	0.462956	0.462931	0.462904	0.462874	0.462841	0.462806	0.462769	0.46273	0.462688	0.462645	0.4626	0.462553	0.462504	0.462454	0.462401	0.462347	0.462291
																				0.462702	0.462896	0.462994	0.463054	0.463091	0.463114	0.463125	0.463128	0.463124	0.463114	0.463099	0.46308	0.463057	0.463031	0.463001	0.462969	0.462933	0.462896	0.462856	0.462813	0.462769	0.462722	0.462674	0.462623	0.462571	0.462516	0.46246	0.462402	0.462342	0.462279
																				0.462857	0.463038	0.463126	0.463179	0.46321	0.463226	0.463232	0.46323	0.463221	0.463206	0.463186	0.463162	0.463134	0.463103	0.463068	0.463031	0.462991	0.462948	0.462903	0.462856	0.462806	0.462754	0.4627	0.462644	0.462586	0.462526	0.462464	0.4624	0.462334	0.462265
																				0.463006	0.463174	0.463254	0.463299	0.463324	0.463335	0.463336	0.463328	0.463314	0.463294	0.46327	0.463241	0.463208	0.463172	0.463133	0.463091	0.463046	0.462998	0.462948	0.462896	0.462841	0.462784	0.462725	0.462664	0.4626	0.462534	0.462466	0.462396	0.462324	0.462249
																				0.463149	0.463305	0.463377	0.463416	0.463435	0.46344	0.463435	0.463423	0.463404	0.463379	0.46335	0.463317	0.463279	0.463239	0.463195	0.463148	0.463098	0.463046	0.462991	0.462933	0.462874	0.462812	0.462747	0.46268	0.462611	0.46254	0.462466	0.46239	0.462311	0.46223
																				0.463288	0.463432	0.463496	0.463528	0.463541	0.463541	0.463532	0.463514	0.46349	0.463461	0.463427	0.463389	0.463347	0.463302	0.463254	0.463202	0.463148	0.463091	0.463031	0.462969	0.462904	0.462837	0.462767	0.462695	0.46262	0.462543	0.462463	0.462381	0.462296	0.462209
																				0.463422	0.463555	0.463611	0.463637	0.463644	0.463639	0.463624	0.463602	0.463574	0.46354	0.463501	0.463459	0.463413	0.463363	0.46331	0.463254	0.463195	0.463133	0.463068	0.463001	0.462931	0.462859	0.462784	0.462706	0.462626	0.462543	0.462458	0.46237	0.462278	0.462184
																				0.463552	0.463673	0.463722	0.463741	0.463743	0.463732	0.463713	0.463686	0.463653	0.463615	0.463572	0.463525	0.463475	0.46342	0.463363	0.463302	0.463239	0.463172	0.463103	0.463031	0.462956	0.462878	0.462798	0.462715	0.46263	0.462541	0.462449	0.462355	0.462257	0.462156
																				0.463677	0.463787	0.463828	0.463842	0.463838	0.463823	0.463798	0.463767	0.463729	0.463687	0.46364	0.463588	0.463533	0.463475	0.463413	0.463347	0.463279	0.463208	0.463134	0.463057	0.462977	0.462895	0.462809	0.462721	0.462629	0.462535	0.462437	0.462337	0.462232	0.462125
																				0.463798	0.463897	0.463931	0.463938	0.463929	0.463909	0.46388	0.463844	0.463802	0.463755	0.463703	0.463648	0.463588	0.463525	0.463459	0.463389	0.463317	0.463241	0.463162	0.46308	0.462995	0.462908	0.462817	0.462723	0.462626	0.462525	0.462422	0.462314	0.462204	0.462089
																				0.463914	0.464003	0.46403	0.464031	0.464017	0.463991	0.463957	0.463917	0.46387	0.463819	0.463763	0.463703	0.46364	0.463572	0.463501	0.463427	0.46335	0.46327	0.463186	0.463099	0.46301	0.462917	0.46282	0.462721	0.462618	0.462512	0.462402	0.462288	0.46217	0.462048
																				0.464027	0.464106	0.464125	0.46412	0.4641	0.46407	0.464031	0.463986	0.463935	0.463879	0.463819	0.463755	0.463687	0.463615	0.46354	0.463461	0.463379	0.463294	0.463206	0.463114	0.463019	0.462921	0.462819	0.462714	0.462605	0.462493	0.462376	0.462256	0.462131	0.462002
																				0.464135	0.464204	0.464216	0.464204	0.464179	0.464144	0.4641	0.464051	0.463995	0.463935	0.46387	0.463802	0.463729	0.463653	0.463574	0.46349	0.463404	0.463314	0.463221	0.463124	0.463024	0.46292	0.462813	0.462702	0.462587	0.462469	0.462345	0.462218	0.462086	0.461949
																				0.46424	0.464297	0.464302	0.464285	0.464254	0.464213	0.464165	0.46411	0.464051	0.463986	0.463917	0.463844	0.463767	0.463686	0.463602	0.463514	0.463423	0.463328	0.46323	0.463128	0.463023	0.462914	0.462801	0.462684	0.462563	0.462437	0.462307	0.462173	0.462033	0.461888
																				0.46434	0.464387	0.464384	0.46436	0.464323	0.464277	0.464224	0.464165	0.4641	0.464031	0.463957	0.46388	0.463798	0.463713	0.463624	0.463532	0.463435	0.463336	0.463232	0.463125	0.463014	0.4629	0.462781	0.462658	0.46253	0.462398	0.462261	0.462119	0.461971	0.461818
																				0.464436	0.464472	0.464461	0.46443	0.464388	0.464336	0.464277	0.464213	0.464144	0.46407	0.463991	0.463909	0.463823	0.463732	0.463639	0.463541	0.46344	0.463335	0.463226	0.463114	0.462997	0.462876	0.462751	0.462622	0.462487	0.462348	0.462203	0.462053	0.461897	0.461735
																				0.464528	0.464551	0.464532	0.464494	0.464445	0.464388	0.464323	0.464254	0.464179	0.4641	0.464017	0.463929	0.463838	0.463743	0.463644	0.463541	0.463435	0.463324	0.46321	0.463091	0.462969	0.462841	0.462709	0.462573	0.462431	0.462284	0.462131	0.461973	0.461808	0.461636
																				0.464614	0.464625	0.464596	0.46455	0.464494	0.46443	0.46436	0.464285	0.464204	0.46412	0.464031	0.463938	0.463842	0.463741	0.463637	0.463528	0.463416	0.463299	0.463179	0.463054	0.462924	0.46279	0.462651	0.462507	0.462357	0.462202	0.46204	0.461872	0.461697	0.461515
																				0.464694	0.464689	0.46465	0.464596	0.464532	0.464461	0.464384	0.464302	0.464216	0.464125	0.46403	0.463931	0.463828	0.463722	0.463611	0.463496	0.463377	0.463254	0.463126	0.462994	0.462857	0.462715	0.462568	0.462415	0.462256	0.462091	0.461919	0.46174	0.461554	0.46136
																				0.464764	0.464742	0.464689	0.464625	0.464551	0.464472	0.464387	0.464297	0.464204	0.464106	0.464003	0.463897	0.463787	0.463673	0.463555	0.463432	0.463305	0.463174	0.463038	0.462896	0.46275	0.462598	0.462441	0.462277	0.462107	0.46193	0.461746	0.461555	0.461355	0.461146
																				0.464812	0.464764	0.464694	0.464614	0.464528	0.464436	0.46434	0.46424	0.464135	0.464027	0.463914	0.463798	0.463677	0.463552	0.463422	0.463288	0.463149	0.463006	0.462857	0.462702	0.462542	0.462376	0.462204	0.462024	0.461838	0.461644	0.461441	0.461231	0.46101	0.46078
[truncated: 131 more columns]
