# Supplementary material for: Trajectories and Forces in Four-Electrode Chambers Operated in Object-Shift, Dielectrophoresis and Field-Cage Modes – Considerations from the System’s Point of View
Source: Preprints.org preprint supplement (doi:10.20944/preprints202309.2147.v1), 2023-09-30
Supplement: Supplementary file 7 [file Tab. S6_+-+- 0,1-in-1.xls]

## Sheet: Four Side Pointed +-+-__Obj_0
Basic Resistance	Basic Conductance	Mean Resistance	Mean Conductance	k		a_X	a_y	a_Resistance in Route	a_Conductance along trajectory	a_Trajectory length		a_Delta Cond	a_Step width along trajectory	a_Mid-distance	a_norm. Force (Delta Cond./basic/diSTep)		b_X	b_Y	b_Resistance in Routh	b_Conductance along trajectory	b_Trajectory length		b-Delta Cond	b_Step width along trajectory	b_Mid-distance	b_norm. Force (Delta Cond./basic/diSTep)		c_X	c_Y	c_Resistance in Routh	c_Conductance along trajectory	c_Trajectory length		c_Delta Cond	c_Step width along trajectory	c_Mid-distance	c_norm. Force (Delta Cond./basic/diSTep)		d_X	d_Y	d_Resistance in Routh	d_Conductance along trajectory	d_Trajectory length		d_Delta Cond	d_Step width along trajectory	d_Mid-distance	d_norm. Force (Delta Cond./basic/diSTep)
2.14377	0.466469	2.18147	0.45931	0.466469		-0.125628	0.40201	2.24225	0.445981	0		0.0002758	0.000527496	0.000263748	1.12086		-0.115578	0.40201	2.25709	0.443048	0		0.000336563	0.000527164	0.000263582	1.36867		0	0.40201	5.65362	0.176878	0		0.0164857	0.00045683	0.000228415	77.3625		-0.40201	0	5.65362	0.176878	0		0.0164857	0.00045683	0.000228415	77.3625
						-0.125892	0.401553	2.24086	0.446256	0.000527496		0.0002758	0.00052739	0.00079119	1.12109		-0.115841	0.401553	2.25538	0.443384	0.000527164		0.000336563	0.000526874	0.000790601	1.36942		0	0.401553	5.17161	0.193363	0.00045683		0.0164857	0.00045683	0.000685244	77.3625		-0.401553	0	5.17161	0.193363	0.00045683		0.0164857	0.00045683	0.000685244	77.3625
						-0.126155	0.401096	2.23948	0.446532	0.00105489		0.000275749	0.000527289	0.00131853	1.1211		-0.116103	0.401096	2.25367	0.443721	0.00105404		0.000336385	0.000526585	0.00131733	1.36945		0	0.401096	4.76533	0.209849	0.000913659		0.0164857	0.00045683	0.00114207	77.3625		-0.401096	0	4.76533	0.209849	0.000913659		0.0164857	0.00045683	0.00114207	77.3625
						-0.126419	0.40064	2.2381	0.446808	0.00158217		0.000275701	0.000527194	0.00184577	1.1211		-0.116365	0.40064	2.25196	0.444057	0.00158062		0.000336208	0.000526298	0.00184377	1.36947		0	0.40064	4.41823	0.226335	0.00137049		0.0164857	0.00045683	0.0015989	77.3625		-0.40064	0	4.41823	0.226335	0.00137049		0.0164857	0.00045683	0.0015989	77.3625
						-0.126682	0.400183	2.23672	0.447084	0.00210937		0.000275657	0.000527105	0.00237292	1.12111		-0.116627	0.400183	2.25026	0.444394	0.00210692		0.000336031	0.000526012	0.00236993	1.3695		0	0.400183	4.11827	0.24282	0.00182732		0.0164857	0.00045683	0.00205573	77.3625		-0.400183	0	4.11827	0.24282	0.00182732		0.0164857	0.00045683	0.00205573	77.3625
						-0.126945	0.399726	2.23534	0.447359	0.00263647		0.000275615	0.000527023	0.00289999	1.12112		-0.116887	0.399726	2.24856	0.44473	0.00263293		0.000335855	0.000525727	0.0028958	1.36952		0	0.399726	3.85645	0.259306	0.00228415		0.0164857	0.00045683	0.00251256	77.3625		-0.399726	0	3.85645	0.259306	0.00228415		0.0164857	0.00045683	0.00251256	77.3625
						-0.127208	0.399269	2.23396	0.447635	0.0031635		0.000274963	0.000526948	0.00342697	1.11862		-0.117148	0.399269	2.24686	0.445066	0.00315866		0.000335568	0.000525445	0.00342138	1.36909		0	0.399269	3.62592	0.275792	0.00274098		0.0164857	0.00045683	0.00296939	77.3625		-0.399269	0	3.62592	0.275792	0.00274098		0.0164857	0.00045683	0.00296939	77.3625
						-0.12747	0.398812	2.23259	0.44791	0.00369045		0.000245685	0.000526881	0.00395389	0.999641		-0.117407	0.398812	2.24517	0.445401	0.00368411		0.000296283	0.000525165	0.00394669	1.20945		0	0.398812	3.42141	0.292278	0.00319781		0.0164857	0.00045683	0.00342622	77.3625		-0.398812	0	3.42141	0.292278	0.00319781		0.0164857	0.00045683	0.00342622	77.3625
						-0.127733	0.398355	2.23137	0.448156	0.00421733		0.00024566	0.000526821	0.00448074	0.999652		-0.117666	0.398355	2.24367	0.445697	0.00420927		0.000296142	0.000524887	0.00447171	1.20951		0	0.398355	3.23873	0.308763	0.00365464		0.0164857	0.00045683	0.00388305	77.3625		-0.398355	0	3.23873	0.308763	0.00365464		0.0164857	0.00045683	0.00388305	77.3625
						-0.127995	0.397899	2.23015	0.448401	0.00474415		0.000245639	0.00052677	0.00500753	0.999661		-0.117925	0.397899	2.24219	0.445994	0.00473416		0.000296001	0.000524612	0.00499646	1.20957		0	0.397899	3.07457	0.325249	0.00411147		0.0164857	0.00045683	0.00433988	77.3625		-0.397899	0	3.07457	0.325249	0.00411147		0.0164857	0.00045683	0.00433988	77.3625
						-0.128257	0.397442	2.22892	0.448647	0.00527092		0.000245621	0.000526729	0.00553428	0.999669		-0.118183	0.397442	2.2407	0.44629	0.00525877		0.000295861	0.00052434	0.00552094	1.20963		0	0.397442	2.92625	0.341735	0.0045683		0.0164857	0.00045683	0.00479671	77.3625		-0.397442	0	2.92625	0.341735	0.0045683		0.0164857	0.00045683	0.00479671	77.3625
						-0.12852	0.396985	2.2277	0.448893	0.00579765		0.000197987	0.000526696	0.00606099	0.805849		-0.11844	0.396985	2.23921	0.446585	0.00578311		0.000239811	0.000524071	0.00604515	0.980973		0	0.396985	2.79158	0.35822	0.00502513		0.00326855	0.00045683	0.00525354	15.3384		-0.396985	0	2.79158	0.35822	0.00502513		0.00326855	0.00045683	0.00525354	15.3384
						-0.128782	0.396528	2.22672	0.449091	0.00632434		0.0001987	0.000528391	0.00658854	0.806158		-0.118697	0.396528	2.23801	0.446825	0.00630718		0.000240572	0.000525561	0.00656996	0.981297		0	0.396528	2.76634	0.361489	0.00548196		0.00326855	0.00045683	0.00571037	15.3384		-0.396528	0	2.76634	0.361489	0.00548196		0.00326855	0.00045683	0.00571037	15.3384
						-0.129047	0.396071	2.22574	0.449289	0.00685273		0.000198479	0.000530201	0.00711783	0.802513		-0.118957	0.396071	2.23681	0.447066	0.00683274		0.000241377	0.00052715	0.00709632	0.981612		0	0.396071	2.74155	0.364757	0.00593878		0.00326855	0.00045683	0.0061672	15.3384		-0.396071	0	2.74155	0.364757	0.00593878		0.00326855	0.00045683	0.0061672	15.3384
						-0.129316	0.395614	2.22476	0.449488	0.00738294		0.000179104	0.000532136	0.007649	0.721541		-0.11922	0.395614	2.2356	0.447307	0.00735989		0.000215328	0.000528849	0.00762432	0.872865		0	0.395614	2.7172	0.368026	0.00639561		0.00326855	0.00045683	0.00662403	15.3384		-0.395614	0	2.7172	0.368026	0.00639561		0.00326855	0.00045683	0.00662403	15.3384
						-0.129589	0.395158	2.22387	0.449667	0.00791507		0.000179834	0.000534208	0.00818218	0.721669		-0.119486	0.395158	2.23452	0.447522	0.00788874		0.000215614	0.000530668	0.00815407	0.871028		0	0.395158	2.69328	0.371295	0.00685244		0.00326855	0.00045683	0.00708086	15.3384		-0.395158	0	2.69328	0.371295	0.00685244		0.00326855	0.00045683	0.00708086	15.3384
						-0.129866	0.394701	2.22298	0.449847	0.00844928		0.000180608	0.000536433	0.0087175	0.72177		-0.119756	0.394701	2.23345	0.447738	0.00841941		0.000216429	0.000532618	0.00868572	0.871117		0	0.394701	2.66978	0.374563	0.00730927		0.00326855	0.00045683	0.00753769	15.3384		-0.394701	0	2.66978	0.374563	0.00730927		0.00326855	0.00045683	0.00753769	15.3384
						-0.130147	0.394244	2.22209	0.450027	0.00898571		0.000181432	0.000538826	0.00925513	0.721842		-0.12003	0.394244	2.23237	0.447954	0.00895203		0.000217295	0.000534715	0.00921938	0.871176		0	0.394244	2.64668	0.377832	0.0077661		0.00326855	0.00045683	0.00799452	15.3384		-0.394244	0	2.64668	0.377832	0.0077661		0.00326855	0.00045683	0.00799452	15.3384
						-0.130433	0.393787	2.22119	0.450209	0.00952454		0.000183135	0.000541406	0.00979524	0.725146		-0.120308	0.393787	2.23129	0.448172	0.00948674		0.000218218	0.000536973	0.00975523	0.871197		0	0.393787	2.62398	0.3811	0.00822293		0.00326855	0.00045683	0.00845135	15.3384		-0.393787	0	2.62398	0.3811	0.00822293		0.00326855	0.00045683	0.00845135	15.3384
						-0.130724	0.39333	2.22029	0.450392	0.0100659		0.000186709	0.000544184	0.010338	0.735523		-0.12059	0.39333	2.2302	0.44839	0.0100237		0.000223623	0.00053941	0.0102934	0.888739		0	0.39333	2.60167	0.384369	0.00867976		0.00326855	0.00045683	0.00890818	15.3384		-0.39333	0	2.60167	0.384369	0.00867976		0.00326855	0.00045683	0.00890818	15.3384
						-0.131019	0.392873	2.21937	0.450579	0.0106101		0.00018239	0.000547165	0.0108837	0.714593		-0.120877	0.392873	2.22909	0.448614	0.0105631		0.000221346	0.000542007	0.0108341	0.875475		0	0.392873	2.57973	0.387637	0.00913659		0.00326855	0.00045683	0.00936501	15.3384		-0.392873	0	2.57973	0.387637	0.00913659		0.00326855	0.00045683	0.00936501	15.3384
						-0.131321	0.392417	2.21847	0.450761	0.0111573		0.000169395	0.000550399	0.0114325	0.659781		-0.121169	0.392417	2.22799	0.448835	0.0111051		0.000201228	0.000544818	0.0113775	0.791796		0	0.392417	2.55816	0.390906	0.00959342		0.00326855	0.00045683	0.00982184	15.3384		-0.392417	0	2.55816	0.390906	0.00959342		0.00326855	0.00045683	0.00982184	15.3384
						-0.131628	0.39196	2.21764	0.45093	0.0117077		0.000156188	0.000553915	0.0119847	0.604481		-0.121466	0.39196	2.22699	0.449036	0.0116499		0.000185576	0.000547873	0.0119239	0.726138		0	0.39196	2.53695	0.394174	0.0100503		0.00158597	0.00045683	0.0102787	7.4425		-0.39196	0	2.53695	0.394174	0.0100503		0.00158597	0.00045683	0.0102787	7.4425
						-0.131941	0.391503	2.21687	0.451086	0.0122616		0.000156513	0.000555013	0.0125391	0.60454		-0.121768	0.391503	2.22607	0.449222	0.0121978		0.0001859	0.000548785	0.0124722	0.726199		0	0.391503	2.52678	0.39576	0.0105071		0.00158597	0.00045683	0.0107355	7.4425		-0.391503	0	2.52678	0.39576	0.0105071		0.00158597	0.00045683	0.0107355	7.4425
						-0.132256	0.391046	2.2161	0.451243	0.0128166		0.000156851	0.000556162	0.0130947	0.604595		-0.122072	0.391046	2.22515	0.449408	0.0127466		0.000186239	0.00054974	0.0130215	0.726257		0	0.391046	2.5167	0.397346	0.0109639		0.00158597	0.00045683	0.0111923	7.4425		-0.391046	0	2.5167	0.397346	0.0109639		0.00158597	0.00045683	0.0111923	7.4425
						-0.132573	0.390589	2.21533	0.4514	0.0133728		0.000157204	0.000557363	0.0136515	0.604647		-0.122378	0.390589	2.22423	0.449594	0.0132963		0.000186591	0.000550738	0.0135717	0.726312		0	0.390589	2.50669	0.398932	0.0114207		0.00158597	0.00045683	0.0116492	7.4425		-0.390589	0	2.50669	0.398932	0.0114207		0.00158597	0.00045683	0.0116492	7.4425
						-0.132893	0.390132	2.21456	0.451557	0.0139301		0.000157571	0.000558621	0.0142095	0.604695		-0.122686	0.390132	2.22331	0.449781	0.0138471		0.000186958	0.000551784	0.014123	0.726363		0	0.390132	2.49676	0.400518	0.0118776		0.00158597	0.00045683	0.012106	7.4425		-0.390132	0	2.49676	0.400518	0.0118776		0.00158597	0.00045683	0.012106	7.4425
						-0.133214	0.389676	2.21379	0.451715	0.0144888		0.000145718	0.00055994	0.0147687	0.557891		-0.122995	0.389676	2.22238	0.449967	0.0143989		0.00017642	0.000552879	0.0146753	0.684063		0	0.389676	2.48692	0.402104	0.0123344		0.00158597	0.00045683	0.0125628	7.4425		-0.389676	0	2.48692	0.402104	0.0123344		0.00158597	0.00045683	0.0125628	7.4425
						-0.133538	0.389219	2.21307	0.45186	0.0150487		0.000142397	0.000561322	0.0153294	0.543835		-0.123306	0.389219	2.22151	0.450144	0.0149517		0.000167678	0.000554028	0.0152288	0.648815		0	0.389219	2.47715	0.40369	0.0127912		0.00158597	0.00045683	0.0130196	7.4425		-0.389219	0	2.47715	0.40369	0.0127912		0.00158597	0.00045683	0.0130196	7.4425
						-0.133864	0.388762	2.21238	0.452003	0.01561		0.000142764	0.000562773	0.0158914	0.54383		-0.12362	0.388762	2.22068	0.450312	0.0155058		0.00016804	0.000555233	0.0157834	0.648807		0	0.388762	2.46745	0.405276	0.0132481		0.00158597	0.00045683	0.0134765	7.4425		-0.388762	0	2.46745	0.405276	0.0132481		0.00158597	0.00045683	0.0134765	7.4425
						-0.134193	0.388305	2.21168	0.452146	0.0161728		0.000143148	0.000564298	0.016455	0.543817		-0.123935	0.388305	2.21986	0.45048	0.016061		0.00016842	0.0005565	0.0163393	0.648792		0	0.388305	2.45783	0.406862	0.0137049		0.00158597	0.00045683	0.0139333	7.4425		-0.388305	0	2.45783	0.406862	0.0137049		0.00158597	0.00045683	0.0139333	7.4425
						-0.134524	0.387848	2.21098	0.452289	0.0167371		0.000143549	0.000565901	0.0170201	0.543796		-0.124253	0.387848	2.21903	0.450648	0.0166175		0.000168817	0.000557831	0.0168964	0.648769		0	0.387848	2.44829	0.408448	0.0141617		0.00158597	0.00045683	0.0143901	7.4425		-0.387848	0	2.44829	0.408448	0.0141617		0.00158597	0.00045683	0.0143901	7.4425
						-0.134858	0.387392	2.21028	0.452432	0.017303		0.000143969	0.000567588	0.0175868	0.543766		-0.124573	0.387392	2.2182	0.450817	0.0171753		0.000169232	0.000559232	0.017455	0.648737		0	0.387392	2.43882	0.410034	0.0146185		0.00158597	0.00045683	0.014847	7.4425		-0.387392	0	2.43882	0.410034	0.0146185		0.00158597	0.00045683	0.014847	7.4425
						-0.135195	0.386935	2.20957	0.452576	0.0178706		0.000132367	0.000569366	0.0181553	0.498388		-0.124896	0.386935	2.21736	0.450986	0.0177346		0.000160541	0.000560707	0.0180149	0.613801		0	0.386935	2.42942	0.41162	0.0150754		0.000972018	0.00045683	0.0153038	4.5614		-0.386935	0	2.42942	0.41162	0.0150754		0.000972018	0.00045683	0.0153038	4.5614
						-0.135535	0.386478	2.20893	0.452709	0.01844		0.000125673	0.000570211	0.0187251	0.47248		-0.125221	0.386478	2.21657	0.451147	0.0182953		0.000145043	0.000561392	0.018576	0.553872		0	0.386478	2.4237	0.412592	0.0155322		0.000972018	0.00045683	0.0157606	4.5614		-0.386478	0	2.4237	0.412592	0.0155322		0.000972018	0.00045683	0.0157606	4.5614
						-0.135876	0.386021	2.20831	0.452834	0.0190102		0.000126838	0.000571054	0.0192957	0.476158		-0.125547	0.386021	2.21586	0.451292	0.0188567		0.000147491	0.000562103	0.0191377	0.562507		0	0.386021	2.418	0.413564	0.015989		0.000972018	0.00045683	0.0162175	4.5614		-0.386021	0	2.418	0.413564	0.015989		0.000972018	0.00045683	0.0162175	4.5614
						-0.136219	0.385564	2.2077	0.452961	0.0195812		0.000127032	0.000571903	0.0198672	0.476177		-0.125875	0.385564	2.21514	0.451439	0.0194188		0.00014842	0.000562793	0.0197002	0.565355		0	0.385564	2.41233	0.414536	0.0164459		0.000972018	0.00045683	0.0166743	4.5614		-0.385564	0	2.41233	0.414536	0.0164459		0.000972018	0.00045683	0.0166743	4.5614
						-0.136563	0.385107	2.20708	0.453088	0.0201531		0.000127233	0.000572785	0.0204395	0.476195		-0.126204	0.385107	2.21441	0.451588	0.0199816		0.00014861	0.000563493	0.0202633	0.565375		0	0.385107	2.40669	0.415508	0.0169027		0.000972018	0.00045683	0.0171311	4.5614		-0.385107	0	2.40669	0.415508	0.0169027		0.000972018	0.00045683	0.0171311	4.5614
						-0.136908	0.384651	2.20646	0.453215	0.0207259		0.000127441	0.000573702	0.0210128	0.476211		-0.126533	0.384651	2.21368	0.451736	0.0205451		0.000148806	0.000564219	0.0208272	0.565393		0	0.384651	2.40107	0.41648	0.0173595		0.000972018	0.00045683	0.0175879	4.5614		-0.384651	0	2.40107	0.41648	0.0173595		0.000972018	0.00045683	0.0175879	4.5614
						-0.137255	0.384194	2.20584	0.453343	0.0212996		0.000126167	0.000574654	0.0215869	0.470669		-0.126865	0.384194	2.21295	0.451885	0.0211093		0.00014901	0.000564975	0.0213918	0.56541		0	0.384194	2.39548	0.417452	0.0178164		0.000972018	0.00045683	0.0180448	4.5614		-0.384194	0	2.39548	0.417452	0.0178164		0.000972018	0.00045683	0.0180448	4.5614
						-0.137604	0.383737	2.20522	0.453469	0.0218743		0.00011562	0.000575645	0.0221621	0.430581		-0.127197	0.383737	2.21222	0.452034	0.0216743		0.000139086	0.00056576	0.0219571	0.527023		0	0.383737	2.38992	0.418424	0.0182732		0.000972018	0.00045683	0.0185016	4.5614		-0.383737	0	2.38992	0.418424	0.0182732		0.000972018	0.00045683	0.0185016	4.5614
						-0.137954	0.38328	2.20466	0.453585	0.0224499		0.000115826	0.000576676	0.0227382	0.430577		-0.127531	0.38328	2.21154	0.452173	0.02224		0.000134358	0.000566577	0.0225233	0.508372		0	0.38328	2.38438	0.419396	0.01873		0.000972018	0.00045683	0.0189584	4.5614		-0.38328	0	2.38438	0.419396	0.01873		0.000972018	0.00045683	0.0189584	4.5614
						-0.138306	0.382823	2.2041	0.4537	0.0230266		0.00011604	0.000577749	0.0233155	0.430572		-0.127866	0.382823	2.21089	0.452307	0.0228066		0.000134558	0.000567427	0.0230903	0.508366		0	0.382823	2.37887	0.420368	0.0191868		0.000972018	0.00045683	0.0194153	4.5614		-0.382823	0	2.37887	0.420368	0.0191868		0.000972018	0.00045683	0.0194153	4.5614
						-0.13866	0.382366	2.20353	0.453816	0.0236043		0.000116262	0.000578867	0.0238938	0.430563		-0.128202	0.382366	2.21023	0.452442	0.023374		0.000134765	0.000568312	0.0236582	0.508358		0	0.382366	2.37338	0.42134	0.0196437		0.000972018	0.00045683	0.0198721	4.5614		-0.382366	0	2.37338	0.42134	0.0196437		0.000972018	0.00045683	0.0198721	4.5614
						-0.139015	0.38191	2.20297	0.453933	0.0241832		0.000113193	0.000580032	0.0244732	0.418354		-0.128541	0.38191	2.20957	0.452577	0.0239423		0.000130961	0.000569234	0.0242269	0.493207		0	0.38191	2.36792	0.422312	0.0201005		0.000665915	0.00045683	0.0203289	3.12494		-0.38191	0	2.36792	0.422312	0.0201005		0.000665915	0.00045683	0.0203289	3.12494
						-0.139373	0.381453	2.20242	0.454046	0.0247632		0.000113323	0.000580689	0.0250536	0.41836		-0.12888	0.381453	2.20893	0.452708	0.0245116		0.00013108	0.000569743	0.0247964	0.493214		0	0.381453	2.36419	0.422978	0.0205573		0.000665915	0.00045683	0.0207857	3.12494		-0.381453	0	2.36419	0.422978	0.0205573		0.000665915	0.00045683	0.0207857	3.12494
						-0.139731	0.380996	2.20187	0.454159	0.0253439		0.000103587	0.00058137	0.0256346	0.381971		-0.129221	0.380996	2.20829	0.452839	0.0250813		0.000126702	0.00057027	0.0253664	0.476298		0	0.380996	2.36047	0.423644	0.0210142		0.000665915	0.00045683	0.0212426	3.12494		-0.380996	0	2.36047	0.423644	0.0210142		0.000665915	0.00045683	0.0212426	3.12494
						-0.140091	0.380539	2.20137	0.454263	0.0259253		0.000102945	0.000582073	0.0262163	0.379144		-0.129562	0.380539	2.20767	0.452966	0.0256516		0.000118446	0.000570814	0.025937	0.444841		0	0.380539	2.35677	0.42431	0.021471		0.000665915	0.00045683	0.0216994	3.12494		-0.380539	0	2.35677	0.42431	0.021471		0.000665915	0.00045683	0.0216994	3.12494
						-0.140451	0.380082	2.20087	0.454366	0.0265074		0.000103648	0.000582801	0.0267988	0.381259		-0.129904	0.380082	2.2071	0.453084	0.0262224		0.000118562	0.000571376	0.0265081	0.444836		0	0.380082	2.35307	0.424976	0.0219278		0.000665915	0.00045683	0.0221562	3.12494		-0.380082	0	2.35307	0.424976	0.0219278		0.000665915	0.00045683	0.0221562	3.12494
						-0.140813	0.379625	2.20037	0.454469	0.0270902		0.000105107	0.000583532	0.0273819	0.386138		-0.130247	0.379625	2.20652	0.453203	0.0267938		0.000118681	0.000571957	0.0270797	0.444831		0	0.379625	2.34939	0.425642	0.0223847		0.000665915	0.00045683	0.0226131	3.12494		-0.379625	0	2.34939	0.425642	0.0223847		0.000665915	0.00045683	0.0226131	3.12494
						-0.141176	0.379169	2.19986	0.454574	0.0276737		0.000105236	0.000584239	0.0279658	0.386146		-0.130592	0.379169	2.20594	0.453321	0.0273657		0.000120788	0.000572558	0.027652	0.452255		0	0.379169	2.34572	0.426308	0.0228415		0.000665915	0.00045683	0.0230699	3.12494		-0.379169	0	2.34572	0.426308	0.0228415		0.000665915	0.00045683	0.0230699	3.12494
						-0.141541	0.378712	2.19935	0.45468	0.0282579		0.00010537	0.000584971	0.0285504	0.386153		-0.130937	0.378712	2.20535	0.453442	0.0279383		0.000121342	0.000573119	0.0282248	0.453882		0	0.378712	2.34206	0.426974	0.0232983		0.000665915	0.00045683	0.0235267	3.12494		-0.378712	0	2.34206	0.426974	0.0232983		0.000665915	0.00045683	0.0235267	3.12494
						-0.141906	0.378255	2.19884	0.454785	0.0288429		9.78106e-05	0.000585728	0.0291358	0.357987		-0.131283	0.378255	2.20476	0.453563	0.0285114		0.000120554	0.000573686	0.0287982	0.450488		0	0.378255	2.33842	0.42764	0.0237551		0.000665915	0.00045683	0.0239836	3.12494		-0.378255	0	2.33842	0.42764	0.0237551		0.000665915	0.00045683	0.0239836	3.12494
						-0.142272	0.377798	2.19837	0.454883	0.0294286		9.59638e-05	0.000586512	0.0297219	0.350758		-0.13163	0.377798	2.20418	0.453684	0.0290851		0.000109938	0.000574273	0.0293722	0.4104		0	0.377798	2.33478	0.428306	0.024212		0.000665915	0.00045683	0.0244404	3.12494		-0.377798	0	2.33478	0.428306	0.024212		0.000665915	0.00045683	0.0244404	3.12494
						-0.14264	0.377341	2.1979	0.454979	0.0300151		9.60962e-05	0.000587325	0.0303088	0.350757		-0.131978	0.377341	2.20364	0.453794	0.0296594		0.000110054	0.000574881	0.0299468	0.410399		0	0.377341	2.33116	0.428971	0.0246688		0.000665915	0.00045683	0.0248972	3.12494		-0.377341	0	2.33116	0.428971	0.0246688		0.000665915	0.00045683	0.0248972	3.12494
						-0.143009	0.376884	2.19744	0.455075	0.0306025		9.45662e-05	0.000588166	0.0308966	0.344678		-0.132327	0.376884	2.20311	0.453904	0.0302342		0.000108082	0.00057551	0.030522	0.402605		0	0.376884	2.32754	0.429637	0.0251256		0.000487536	0.00045683	0.025354	2.28786		-0.376884	0	2.32754	0.429637	0.0251256		0.000487536	0.00045683	0.025354	2.28786
						-0.14338	0.376428	2.19698	0.45517	0.0311906		9.46526e-05	0.000588699	0.031485	0.344681		-0.132677	0.376428	2.20259	0.454012	0.0308097		0.000108156	0.000575899	0.0310977	0.402609		0	0.376428	2.32491	0.430125	0.0255825		0.000487536	0.00045683	0.0258109	2.28786		-0.376428	0	2.32491	0.430125	0.0255825		0.000487536	0.00045683	0.0258109	2.28786
						-0.143751	0.375971	2.19653	0.455264	0.0317793		9.47416e-05	0.000589247	0.032074	0.344684		-0.133027	0.375971	2.20206	0.45412	0.0313856		0.000108232	0.000576299	0.0316738	0.402612		0	0.375971	2.32227	0.430612	0.0260393		0.000487536	0.00045683	0.0262677	2.28786		-0.375971	0	2.32227	0.430612	0.0260393		0.000487536	0.00045683	0.0262677	2.28786
						-0.144123	0.375514	2.19607	0.455359	0.0323686		8.87189e-05	0.000589813	0.0326635	0.322463		-0.133379	0.375514	2.20154	0.454228	0.0319619		0.00010831	0.000576711	0.0322503	0.402615		0	0.375514	2.31965	0.4311	0.0264961		0.000487536	0.00045683	0.0267245	2.28786		-0.375514	0	2.31965	0.4311	0.0264961		0.000487536	0.00045683	0.0267245	2.28786
						-0.144496	0.375057	2.19564	0.455448	0.0329584		8.63919e-05	0.000590396	0.0332536	0.313694		-0.133731	0.375057	2.20101	0.454337	0.0325387		9.97654e-05	0.000577135	0.0328272	0.370579		0	0.375057	2.31703	0.431588	0.0269529		0.000487536	0.00045683	0.0271814	2.28786		-0.375057	0	2.31703	0.431588	0.0269529		0.000487536	0.00045683	0.0271814	2.28786
						-0.14487	0.3746	2.19523	0.455534	0.0335488		8.64793e-05	0.000590998	0.0338443	0.313692		-0.134083	0.3746	2.20053	0.454436	0.0331158		9.83341e-05	0.000577571	0.0334046	0.364986		0	0.3746	2.31441	0.432075	0.0274098		0.000487536	0.00045683	0.0276382	2.28786		-0.3746	0	2.31441	0.432075	0.0274098		0.000487536	0.00045683	0.0276382	2.28786
						-0.145245	0.374143	2.19481	0.45562	0.0341398		8.65693e-05	0.000591619	0.0344356	0.313689		-0.134437	0.374143	2.20005	0.454535	0.0336934		9.841e-05	0.000578021	0.0339824	0.364983		0	0.374143	2.3118	0.432563	0.0278666		0.000487536	0.00045683	0.028095	2.28786		-0.374143	0	2.3118	0.432563	0.0278666		0.000487536	0.00045683	0.028095	2.28786
						-0.145621	0.373687	2.19439	0.455707	0.0347314		8.78025e-05	0.00059226	0.0350275	0.317813		-0.134791	0.373687	2.19958	0.454633	0.0342714		9.84881e-05	0.000578485	0.0345606	0.36498		0	0.373687	2.3092	0.43305	0.0283234		0.000487536	0.00045683	0.0285519	2.28786		-0.373687	0	2.3092	0.43305	0.0283234		0.000487536	0.00045683	0.0285519	2.28786
						-0.145998	0.37323	2.19397	0.455795	0.0353237		8.8348e-05	0.000592866	0.0356201	0.319461		-0.135146	0.37323	2.1991	0.454732	0.0348499		9.85685e-05	0.000578963	0.0351393	0.364977		0	0.37323	2.3066	0.433538	0.0287803		0.000487536	0.00045683	0.0290087	2.28786		-0.37323	0	2.3066	0.433538	0.0287803		0.000487536	0.00045683	0.0290087	2.28786
						-0.146376	0.372773	2.19354	0.455883	0.0359165		8.31247e-05	0.000593469	0.0362133	0.300268		-0.135502	0.372773	2.19862	0.45483	0.0354288		9.96467e-05	0.000579455	0.0357186	0.368655		0	0.372773	2.30401	0.434025	0.0292371		0.000487536	0.00045683	0.0294655	2.28786		-0.372773	0	2.30401	0.434025	0.0292371		0.000487536	0.00045683	0.0294655	2.28786
						-0.146755	0.372316	2.19314	0.455966	0.03651		8.0726e-05	0.000594092	0.0368071	0.291298		-0.135858	0.372316	2.19814	0.45493	0.0360083		9.46256e-05	0.000579925	0.0362982	0.349796		0	0.372316	2.30143	0.434513	0.0296939		0.000487536	0.00045683	0.0299223	2.28786		-0.372316	0	2.30143	0.434513	0.0296939		0.000487536	0.00045683	0.0299223	2.28786
						-0.147135	0.371859	2.19276	0.456047	0.0371041		8.00108e-05	0.000594735	0.0374015	0.288405		-0.136215	0.371859	2.19768	0.455024	0.0365882		9.0487e-05	0.000580371	0.0368784	0.33424		0	0.371859	2.29885	0.435	0.0301508		0.000373338	0.00045683	0.0303792	1.75197		-0.371859	0	2.29885	0.435	0.0301508		0.000373338	0.00045683	0.0303792	1.75197
						-0.147516	0.371402	2.19237	0.456127	0.0376988		8.00711e-05	0.000595179	0.0379964	0.288407		-0.136573	0.371402	2.19725	0.455115	0.0371686		9.05343e-05	0.00058067	0.0374589	0.334243		0	0.371402	2.29688	0.435374	0.0306076		0.000373338	0.00045683	0.030836	1.75197		-0.371402	0	2.29688	0.435374	0.0306076		0.000373338	0.00045683	0.030836	1.75197
						-0.147897	0.370946	2.19199	0.456207	0.038294		8.01329e-05	0.000595635	0.0385918	0.288409		-0.136932	0.370946	2.19681	0.455206	0.0377492		9.05828e-05	0.000580977	0.0380397	0.334245		0	0.370946	2.29491	0.435747	0.0310644		0.000373338	0.00045683	0.0312928	1.75197		-0.370946	0	2.29491	0.435747	0.0310644		0.000373338	0.00045683	0.0312928	1.75197
						-0.148279	0.370489	2.1916	0.456287	0.0388896		8.01965e-05	0.000596105	0.0391877	0.28841		-0.137291	0.370489	2.19637	0.455296	0.0383302		9.06325e-05	0.000581292	0.0386209	0.334247		0	0.370489	2.29295	0.43612	0.0315212		0.000373338	0.00045683	0.0317497	1.75197		-0.370489	0	2.29295	0.43612	0.0315212		0.000373338	0.00045683	0.0317497	1.75197
						-0.148662	0.370032	2.19122	0.456367	0.0394858		7.54879e-05	0.000596588	0.039784	0.271257		-0.13765	0.370032	2.19594	0.455387	0.0389115		9.06835e-05	0.000581615	0.0392023	0.334249		0	0.370032	2.29098	0.436494	0.0319781		0.000373338	0.00045683	0.0322065	1.75197		-0.370032	0	2.29098	0.436494	0.0319781		0.000373338	0.00045683	0.0322065	1.75197
						-0.149046	0.369575	2.19085	0.456443	0.0400823		7.33604e-05	0.000597085	0.0403809	0.263392		-0.13801	0.369575	2.1955	0.455477	0.0394931		8.66758e-05	0.000581948	0.0397841	0.319294		0	0.369575	2.28903	0.436867	0.0324349		0.000373338	0.00045683	0.0326633	1.75197		-0.369575	0	2.28903	0.436867	0.0324349		0.000373338	0.00045683	0.0326633	1.75197
						-0.14943	0.369118	2.1905	0.456516	0.0406794		7.34229e-05	0.000597597	0.0409782	0.263391		-0.138371	0.369118	2.19508	0.455564	0.0400751		8.26521e-05	0.000582289	0.0403662	0.304294		0	0.369118	2.28707	0.43724	0.0328917		0.000373338	0.00045683	0.0331201	1.75197		-0.369118	0	2.28707	0.43724	0.0328917		0.000373338	0.00045683	0.0331201	1.75197
						-0.149816	0.368661	2.19015	0.45659	0.041277		7.34871e-05	0.000598124	0.0415761	0.263389		-0.138732	0.368661	2.19468	0.455647	0.0406574		8.27016e-05	0.00058264	0.0409487	0.304293		0	0.368661	2.28512	0.437614	0.0333486		0.000373338	0.00045683	0.033577	1.75197		-0.368661	0	2.28512	0.437614	0.0333486		0.000373338	0.00045683	0.033577	1.75197
						-0.150202	0.368205	2.1898	0.456663	0.0418751		7.35532e-05	0.000598666	0.0421745	0.263387		-0.139093	0.368205	2.19428	0.455729	0.04124		8.27524e-05	0.000583	0.0415315	0.304291		0	0.368205	2.28317	0.437987	0.0338054		0.000373338	0.00045683	0.0340338	1.75197		-0.368205	0	2.28317	0.437987	0.0338054		0.000373338	0.00045683	0.0340338	1.75197
						-0.150589	0.367748	2.18944	0.456737	0.0424738		7.44022e-05	0.000599225	0.0427734	0.266178		-0.139456	0.367748	2.19389	0.455812	0.041823		8.28046e-05	0.00058337	0.0421147	0.30429		0	0.367748	2.28123	0.43836	0.0342622		0.000373338	0.00045683	0.0344906	1.75197		-0.367748	0	2.28123	0.43836	0.0342622		0.000373338	0.00045683	0.0344906	1.75197
						-0.150976	0.367291	2.18909	0.456811	0.043073		7.04186e-05	0.000599755	0.0433729	0.251704		-0.139818	0.367291	2.19349	0.455895	0.0424064		8.28582e-05	0.000583751	0.0426983	0.304288		0	0.367291	2.27929	0.438734	0.034719		0.000373338	0.00045683	0.0349475	1.75197		-0.367291	0	2.27929	0.438734	0.034719		0.000373338	0.00045683	0.0349475	1.75197
						-0.151365	0.366834	2.18875	0.456882	0.0436728		6.83901e-05	0.000600267	0.0439729	0.244245		-0.140182	0.366834	2.19309	0.455978	0.0429901		7.96674e-05	0.000584142	0.0432822	0.292375		0	0.366834	2.27735	0.439107	0.0351759		0.000295408	0.00045683	0.0354043	1.38626		-0.366834	0	2.27735	0.439107	0.0351759		0.000295408	0.00045683	0.0354043	1.38626
						-0.151754	0.366377	2.18842	0.45695	0.0442731		6.84337e-05	0.000600646	0.0445734	0.244247		-0.140546	0.366377	2.19271	0.456058	0.0435743		7.59902e-05	0.000584445	0.0438665	0.278735		0	0.366377	2.27582	0.439402	0.0356327		0.000295408	0.00045683	0.0358611	1.38626		-0.366377	0	2.27582	0.439402	0.0356327		0.000295408	0.00045683	0.0358611	1.38626
						-0.152144	0.365921	2.1881	0.457018	0.0448737		6.84784e-05	0.000601035	0.0451742	0.244248		-0.14091	0.365921	2.19234	0.456134	0.0441587		7.66939e-05	0.000584713	0.0444511	0.281188		0	0.365921	2.27429	0.439698	0.0360895		0.000295408	0.00045683	0.036318	1.38626		-0.365921	0	2.27429	0.439698	0.0360895		0.000295408	0.00045683	0.036318	1.38626
						-0.152535	0.365464	2.18777	0.457087	0.0454747		6.85243e-05	0.000601435	0.0457755	0.244249		-0.141275	0.365464	2.19197	0.45621	0.0447434		7.67259e-05	0.000584953	0.0450359	0.281189		0	0.365464	2.27276	0.439993	0.0365464		0.000295408	0.00045683	0.0367748	1.38626		-0.365464	0	2.27276	0.439993	0.0365464		0.000295408	0.00045683	0.0367748	1.38626
						-0.152926	0.365007	2.18744	0.457155	0.0460762		6.85714e-05	0.000601846	0.0463771	0.24425		-0.141641	0.365007	2.1916	0.456287	0.0453284		7.67586e-05	0.000585199	0.045621	0.281191		0	0.365007	2.27124	0.440289	0.0370032		0.000295408	0.00045683	0.0372316	1.38626		-0.365007	0	2.27124	0.440289	0.0370032		0.000295408	0.00045683	0.0372316	1.38626
						-0.153318	0.36455	2.18711	0.457224	0.046678		6.40443e-05	0.000602269	0.0469792	0.227965		-0.142006	0.36455	2.19123	0.456364	0.0459136		7.6792e-05	0.000585451	0.0462063	0.281192		0	0.36455	2.26971	0.440584	0.03746		0.000295408	0.00045683	0.0376884	1.38626		-0.36455	0	2.26971	0.440584	0.03746		0.000295408	0.00045683	0.0376884	1.38626
						-0.153711	0.364093	2.18681	0.457288	0.0472803		6.28874e-05	0.000602703	0.0475816	0.223686		-0.142373	0.364093	2.19087	0.45644	0.046499		7.51462e-05	0.000585709	0.0467919	0.275044		0	0.364093	2.26819	0.440879	0.0379169		0.000295408	0.00045683	0.0381453	1.38626		-0.364093	0	2.26819	0.440879	0.0379169		0.000295408	0.00045683	0.0381453	1.38626
						-0.154104	0.363636	2.1865	0.457351	0.047883		6.29338e-05	0.000603149	0.0481846	0.223685		-0.142739	0.363636	2.19051	0.456516	0.0470847		7.02143e-05	0.000585974	0.0473777	0.256877		0	0.363636	2.26667	0.441175	0.0383737		0.000295408	0.00045683	0.0386021	1.38626		-0.363636	0	2.26667	0.441175	0.0383737		0.000295408	0.00045683	0.0386021	1.38626
						-0.154497	0.36318	2.1862	0.457414	0.0484861		6.29814e-05	0.000603607	0.0487879	0.223684		-0.143106	0.36318	2.19017	0.456586	0.0476707		7.02467e-05	0.000586246	0.0479638	0.256876		0	0.36318	2.26516	0.44147	0.0388305		0.000295408	0.00045683	0.0390589	1.38626		-0.36318	0	2.26516	0.44147	0.0388305		0.000295408	0.00045683	0.0390589	1.38626
						-0.154892	0.362723	2.1859	0.457477	0.0490898		6.30303e-05	0.000604079	0.0493918	0.223683		-0.143473	0.362723	2.18983	0.456656	0.048257		7.028e-05	0.000586524	0.0485502	0.256876		0	0.362723	2.26364	0.441766	0.0392873		0.000295408	0.00045683	0.0395158	1.38626		-0.362723	0	2.26364	0.441766	0.0392873		0.000295408	0.00045683	0.0395158	1.38626
						-0.155287	0.362266	2.1856	0.45754	0.0496938		6.30805e-05	0.000604564	0.0499961	0.223682		-0.143841	0.362266	2.18949	0.456726	0.0488435		7.03141e-05	0.000586809	0.0491369	0.256876		0	0.362266	2.26213	0.442061	0.0397442		0.000295408	0.00045683	0.0399726	1.38626		-0.362266	0	2.26213	0.442061	0.0397442		0.000295408	0.00045683	0.0399726	1.38626
						-0.155683	0.361809	2.1853	0.457603	0.0502984		5.92591e-05	0.000605063	0.0506009	0.209958		-0.14421	0.361809	2.18916	0.456797	0.0494303		7.01177e-05	0.000587102	0.0497238	0.256031		0	0.361809	2.26062	0.442356	0.040201		0.000239683	0.00045683	0.0404294	1.12476		-0.361809	0	2.26062	0.442356	0.040201		0.000239683	0.00045683	0.0404294	1.12476
						-0.15608	0.361352	2.18502	0.457662	0.0509035		5.89797e-05	0.000605414	0.0512062	0.208847		-0.144578	0.361352	2.18882	0.456867	0.0500174		6.91898e-05	0.000587342	0.0503111	0.252539		0	0.361352	2.2594	0.442596	0.0406578		0.000239683	0.00045683	0.0408862	1.12476		-0.361352	0	2.2594	0.442596	0.0406578		0.000239683	0.00045683	0.0408862	1.12476
						-0.156477	0.360895	2.18474	0.457721	0.0515089		5.90131e-05	0.000605754	0.0518117	0.208848		-0.144948	0.360895	2.18849	0.456936	0.0506047		6.42122e-05	0.000587588	0.0508985	0.234273		0	0.360895	2.25817	0.442836	0.0411147		0.000239683	0.00045683	0.0413431	1.12476		-0.360895	0	2.25817	0.442836	0.0411147		0.000239683	0.00045683	0.0413431	1.12476
						-0.156875	0.360439	2.18445	0.45778	0.0521146		5.90474e-05	0.000606103	0.0524177	0.208849		-0.145317	0.360439	2.18818	0.457	0.0511923		6.42392e-05	0.000587839	0.0514862	0.234272		0	0.360439	2.25695	0.443076	0.0415715		0.000239683	0.00045683	0.0417999	1.12476		-0.360439	0	2.25695	0.443076	0.0415715		0.000239683	0.00045683	0.0417999	1.12476
						-0.157273	0.359982	2.18417	0.457839	0.0527207		5.90826e-05	0.000606461	0.053024	0.20885		-0.145687	0.359982	2.18788	0.457064	0.0517802		6.54396e-05	0.000588095	0.0520742	0.238545		0	0.359982	2.25573	0.443315	0.0420283		0.000239683	0.00045683	0.0422567	1.12476		-0.359982	0	2.25573	0.443315	0.0420283		0.000239683	0.00045683	0.0422567	1.12476
						-0.157672	0.359525	2.18389	0.457898	0.0533272		5.90695e-05	0.000606829	0.0536306	0.208677		-0.146057	0.359525	2.18756	0.45713	0.0523683		6.56102e-05	0.000588291	0.0526624	0.239088		0	0.359525	2.25451	0.443555	0.0424852		0.000239683	0.00045683	0.0427136	1.12476		-0.359525	0	2.25451	0.443555	0.0424852		0.000239683	0.00045683	0.0427136	1.12476
						-0.158072	0.359068	2.18361	0.457957	0.053934		5.42923e-05	0.000607206	0.0542376	0.191681		-0.146428	0.359068	2.18725	0.457195	0.0529566		6.56319e-05	0.000588482	0.0532508	0.239089		0	0.359068	2.25329	0.443795	0.042942		0.000239683	0.00045683	0.0431704	1.12476		-0.359068	0	2.25329	0.443795	0.042942		0.000239683	0.00045683	0.0431704	1.12476
						-0.158472	0.358611	2.18335	0.458012	0.0545412		5.43269e-05	0.000607594	0.054845	0.191681		-0.146799	0.358611	2.18693	0.457261	0.053545		6.51803e-05	0.000588678	0.0538394	0.237365		0	0.358611	2.25208	0.444034	0.0433988		0.000239683	0.00045683	0.0436272	1.12476		-0.358611	0	2.25208	0.444034	0.0433988		0.000239683	0.00045683	0.0436272	1.12476
						-0.158872	0.358154	2.18309	0.458066	0.0551488		5.43624e-05	0.000607992	0.0554528	0.191681		-0.14717	0.358154	2.18662	0.457326	0.0541337		6.01627e-05	0.000588879	0.0544282	0.219018		0	0.358154	2.25086	0.444274	0.0438556		0.000239683	0.00045683	0.0440841	1.12476		-0.358154	0	2.25086	0.444274	0.0438556		0.000239683	0.00045683	0.0440841	1.12476
						-0.159274	0.357698	2.18283	0.45812	0.0557568		5.43988e-05	0.0006084	0.056061	0.19168		-0.147542	0.357698	2.18633	0.457386	0.0547226		6.01837e-05	0.000589084	0.0550171	0.219018		0	0.357698	2.24965	0.444514	0.0443125		0.000239683	0.00045683	0.0445409	1.12476		-0.357698	0	2.24965	0.444514	0.0443125		0.000239683	0.00045683	0.0445409	1.12476
						-0.159675	0.357241	2.18257	0.458175	0.0563652		5.44362e-05	0.00060882	0.0566696	0.19168		-0.147914	0.357241	2.18605	0.457447	0.0553117		6.02051e-05	0.000589293	0.0556063	0.219018		0	0.357241	2.24844	0.444753	0.0447693		0.000239683	0.00045683	0.0449977	1.12476		-0.357241	0	2.24844	0.444753	0.0447693		0.000239683	0.00045683	0.0449977	1.12476
						-0.160078	0.356784	2.18231	0.458229	0.056974		5.38958e-05	0.000609251	0.0572787	0.189643		-0.148286	0.356784	2.18576	0.457507	0.055901		6.02313e-05	0.000589508	0.0561957	0.219033		0	0.356784	2.24723	0.444993	0.0452261		0.000198379	0.00045683	0.0454545	0.930933		-0.356784	0	2.24723	0.444993	0.0452261		0.000198379	0.00045683	0.0454545	0.930933
						-0.160481	0.356327	2.18206	0.458283	0.0575833		5.03715e-05	0.000609626	0.0578881	0.177133		-0.148659	0.356327	2.18547	0.457567	0.0564905		6.02504e-05	0.000589695	0.0567853	0.219033		0	0.356327	2.24622	0.445191	0.045683		0.000198379	0.00045683	0.0459114	0.930933		-0.356327	0	2.24622	0.445191	0.045683		0.000198379	0.00045683	0.0459114	0.930933
						-0.160885	0.35587	2.18182	0.458334	0.0581929		5.12088e-05	0.000609994	0.0584979	0.179969		-0.149032	0.35587	2.18518	0.457627	0.0570802		6.01408e-05	0.000589886	0.0573751	0.218564		0	0.35587	2.24522	0.44539	0.0461398		0.000198379	0.00045683	0.0463682	0.930933		-0.35587	0	2.24522	0.44539	0.0461398		0.000198379	0.00045683	0.0463682	0.930933
						-0.161289	0.355413	2.18157	0.458385	0.0588029		5.12353e-05	0.000610306	0.0591081	0.179969		-0.149405	0.355413	2.1849	0.457687	0.0576701		5.52998e-05	0.00059008	0.0579651	0.200905		0	0.355413	2.24422	0.445588	0.0465966		0.000198379	0.00045683	0.046825	0.930933		-0.355413	0	2.24422	0.445588	0.0465966		0.000198379	0.00045683	0.046825	0.930933
						-0.161693	0.354957	2.18133	0.458436	0.0594132		5.12623e-05	0.000610626	0.0597185	0.17997		-0.149778	0.354957	2.18463	0.457743	0.0582601		5.53181e-05	0.000590277	0.0585553	0.200904		0	0.354957	2.24323	0.445787	0.0470534		0.000198379	0.00045683	0.0472819	0.930933		-0.354957	0	2.24323	0.445787	0.0470534		0.000198379	0.00045683	0.0472819	0.930933
						-0.162099	0.3545	2.18109	0.458487	0.0600238		5.12901e-05	0.000610954	0.0603293	0.179971		-0.150152	0.3545	2.18437	0.457798	0.0588504		5.53368e-05	0.000590479	0.0591457	0.200903		0	0.3545	2.24223	0.445985	0.0475103		0.000198379	0.00045683	0.0477387	0.930933		-0.3545	0	2.24223	0.445985	0.0475103		0.000198379	0.00045683	0.0477387	0.930933
						-0.162504	0.354043	2.18084	0.458538	0.0606348		4.99778e-05	0.00061129	0.0609404	0.17527		-0.150526	0.354043	2.18411	0.457853	0.0594409		5.58048e-05	0.000590684	0.0597362	0.202532		0	0.354043	2.24123	0.446183	0.0479671		0.000198379	0.00045683	0.0481955	0.930933		-0.354043	0	2.24123	0.446183	0.0479671		0.000198379	0.00045683	0.0481955	0.930933
						-0.162911	0.353586	2.1806	0.458588	0.0612461		4.72007e-05	0.000611635	0.0615519	0.165437		-0.150901	0.353586	2.18384	0.457909	0.0600316		5.65181e-05	0.000590865	0.060327	0.205058		0	0.353586	2.24024	0.446382	0.0484239		0.000198379	0.00045683	0.0486524	0.930933		-0.353586	0	2.24024	0.446382	0.0484239		0.000198379	0.00045683	0.0486524	0.930933
						-0.163317	0.353129	2.18038	0.458636	0.0618577		4.72281e-05	0.000611989	0.0621637	0.165438		-0.151275	0.353129	2.18357	0.457966	0.0606224		5.65319e-05	0.000591006	0.0609179	0.205059		0	0.353129	2.23924	0.44658	0.0488808		0.000198379	0.00045683	0.0491092	0.930933		-0.353129	0	2.23924	0.44658	0.0488808		0.000198379	0.00045683	0.0491092	0.930933
						-0.163724	0.352672	2.18016	0.458683	0.0624697		4.72561e-05	0.000612352	0.0627759	0.165438		-0.15165	0.352672	2.1833	0.458022	0.0612134		5.20043e-05	0.00059115	0.061509	0.18859		0	0.352672	2.23825	0.446778	0.0493376		0.000198379	0.00045683	0.049566	0.930933		-0.352672	0	2.23825	0.446778	0.0493376		0.000198379	0.00045683	0.049566	0.930933
						-0.164132	0.352216	2.17993	0.45873	0.0630821		4.72848e-05	0.000612725	0.0633884	0.165437		-0.152026	0.352216	2.18305	0.458074	0.0618046		5.19221e-05	0.000591297	0.0621002	0.188245		0	0.352216	2.23725	0.446977	0.0497944		0.000198379	0.00045683	0.0500228	0.930933		-0.352216	0	2.23725	0.446977	0.0497944		0.000198379	0.00045683	0.0500228	0.930933
						-0.164541	0.351759	2.17971	0.458777	0.0636948		4.75453e-05	0.000613107	0.0640013	0.166245		-0.152401	0.351759	2.1828	0.458126	0.0623959		5.20879e-05	0.000591448	0.0626916	0.188798		0	0.351759	2.23626	0.447175	0.0502513		0.000166874	0.00045683	0.0504797	0.783092		-0.351759	0	2.23626	0.447175	0.0502513		0.000166874	0.00045683	0.0504797	0.783092
						-0.164949	0.351302	2.17948	0.458825	0.0643079		4.56169e-05	0.000613455	0.0646146	0.159412		-0.152777	0.351302	2.18256	0.458178	0.0629873		5.21002e-05	0.000591587	0.0632831	0.188799		0	0.351302	2.23543	0.447342	0.0507081		0.000166874	0.00045683	0.0509365	0.783092		-0.351302	0	2.23543	0.447342	0.0507081		0.000166874	0.00045683	0.0509365	0.783092
						-0.165359	0.350845	2.17926	0.458871	0.0649213		4.37775e-05	0.000613811	0.0652282	0.152895		-0.153152	0.350845	2.18231	0.45823	0.0635789		5.21127e-05	0.000591728	0.0638748	0.188799		0	0.350845	2.23459	0.447509	0.0511649		0.000166874	0.00045683	0.0513933	0.783092		-0.350845	0	2.23459	0.447509	0.0511649		0.000166874	0.00045683	0.0513933	0.783092
						-0.165769	0.350388	2.17906	0.458914	0.0655351		4.45761e-05	0.000614175	0.0658422	0.155592		-0.153529	0.350388	2.18206	0.458283	0.0641707		5.21254e-05	0.000591872	0.0644666	0.188799		0	0.350388	2.23376	0.447676	0.0516217		0.000166874	0.00045683	0.0518502	0.783092		-0.350388	0	2.23376	0.447676	0.0516217		0.000166874	0.00045683	0.0518502	0.783092
						-0.166179	0.349931	2.17884	0.458959	0.0661493		4.47316e-05	0.000614479	0.0664566	0.156058		-0.153905	0.349931	2.18181	0.458335	0.0647625		4.81469e-05	0.000592018	0.0650585	0.174346		0	0.349931	2.23293	0.447843	0.0520786		0.000166874	0.00045683	0.052307	0.783092		-0.349931	0	2.23293	0.447843	0.0520786		0.000166874	0.00045683	0.052307	0.783092
						-0.16659	0.349475	2.17863	0.459004	0.0667638		4.47536e-05	0.000614778	0.0670712	0.156058		-0.154281	0.349475	2.18158	0.458383	0.0653545		4.7922e-05	0.000592167	0.0656506	0.173488		0	0.349475	2.2321	0.44801	0.0525354		0.000166874	0.00045683	0.0527638	0.783092		-0.349475	0	2.2321	0.44801	0.0525354		0.000166874	0.00045683	0.0527638	0.783092
						-0.167002	0.349018	2.17842	0.459048	0.0673786		4.47761e-05	0.000615086	0.0676861	0.156059		-0.154658	0.349018	2.18135	0.458431	0.0659467		4.79341e-05	0.000592317	0.0662429	0.173487		0	0.349018	2.23126	0.448176	0.0529922		0.000166874	0.00045683	0.0532206	0.783092		-0.349018	0	2.23126	0.448176	0.0529922		0.000166874	0.00045683	0.0532206	0.783092
						-0.167414	0.348561	2.17821	0.459093	0.0679937		4.22223e-05	0.0006154	0.0683014	0.147083		-0.155035	0.348561	2.18113	0.458479	0.066539		4.79464e-05	0.000592471	0.0668353	0.173487		0	0.348561	2.23043	0.448343	0.0534491		0.000166874	0.00045683	0.0536775	0.783092		-0.348561	0	2.23043	0.448343	0.0534491		0.000166874	0.00045683	0.0536775	0.783092
						-0.167826	0.348104	2.17801	0.459135	0.0686091		4.12448e-05	0.000615723	0.0689169	0.143602		-0.155413	0.348104	2.1809	0.458527	0.0671315		4.79885e-05	0.000592627	0.0674278	0.173594		0	0.348104	2.2296	0.44851	0.0539059		0.000166874	0.00045683	0.0541343	0.783092		-0.348104	0	2.2296	0.44851	0.0539059		0.000166874	0.00045683	0.0541343	0.783092
						-0.168239	0.347647	2.17781	0.459177	0.0692248		4.1267e-05	0.000616054	0.0695328	0.143602		-0.15579	0.347647	2.18067	0.458575	0.0677241		4.89765e-05	0.000592783	0.0680205	0.177121		0	0.347647	2.22877	0.448677	0.0543627		0.000166874	0.00045683	0.0545911	0.783092		-0.347647	0	2.22877	0.448677	0.0543627		0.000166874	0.00045683	0.0545911	0.783092
						-0.168652	0.34719	2.17762	0.459218	0.0698408		4.12898e-05	0.000616394	0.070149	0.143603		-0.156168	0.34719	2.18044	0.458624	0.0683169		4.53585e-05	0.000592876	0.0686134	0.164011		0	0.34719	2.22795	0.448844	0.0548196		0.000166874	0.00045683	0.055048	0.783092		-0.34719	0	2.22795	0.448844	0.0548196		0.000166874	0.00045683	0.055048	0.783092
						-0.169066	0.346734	2.17742	0.459259	0.0704572		4.16184e-05	0.000616742	0.0707656	0.144664		-0.156546	0.346734	2.18022	0.458669	0.0689098		4.5292e-05	0.00059297	0.0692063	0.163744		0	0.346734	2.22712	0.449011	0.0552764		0.000142278	0.00045683	0.0555048	0.66767		-0.346734	0	2.22712	0.449011	0.0552764		0.000142278	0.00045683	0.0555048	0.66767
						-0.16948	0.346277	2.17722	0.459301	0.071074		4.16404e-05	0.00061707	0.0713825	0.144663		-0.156924	0.346277	2.18001	0.458714	0.0695028		4.52993e-05	0.000593065	0.0697993	0.163745		0	0.346277	2.22641	0.449153	0.0557332		0.000142278	0.00045683	0.0559616	0.66767		-0.346277	0	2.22641	0.449153	0.0557332		0.000142278	0.00045683	0.0559616	0.66767
						-0.169895	0.34582	2.17702	0.459343	0.0716911		3.85185e-05	0.000617407	0.0719998	0.133745		-0.157302	0.34582	2.17979	0.45876	0.0700958		4.53067e-05	0.000593161	0.0703924	0.163745		0	0.34582	2.22571	0.449295	0.05619		0.000142278	0.00045683	0.0564185	0.66767		-0.34582	0	2.22571	0.449295	0.05619		0.000142278	0.00045683	0.0564185	0.66767
						-0.17031	0.345363	2.17684	0.459381	0.0723085		3.83664e-05	0.000617751	0.0726173	0.133142		-0.15768	0.345363	2.17958	0.458805	0.070689		4.53142e-05	0.000593259	0.0709856	0.163745		0	0.345363	2.225	0.449438	0.0566469		0.000142278	0.00045683	0.0568753	0.66767		-0.345363	0	2.225	0.449438	0.0566469		0.000142278	0.00045683	0.0568753	0.66767
						-0.170726	0.344906	2.17666	0.459419	0.0729262		3.89586e-05	0.000618103	0.0732353	0.13512		-0.158059	0.344906	2.17936	0.45885	0.0712822		4.53218e-05	0.000593358	0.0715789	0.163745		0	0.344906	2.2243	0.44958	0.0571037		0.000142278	0.00045683	0.0573321	0.66767		-0.344906	0	2.2243	0.44958	0.0571037		0.000142278	0.00045683	0.0573321	0.66767
						-0.171143	0.34445	2.17648	0.459458	0.0735443		3.92315e-05	0.000618408	0.0738535	0.136		-0.158437	0.34445	2.17915	0.458895	0.0718756		4.2063e-05	0.000593458	0.0721723	0.151945		0	0.34445	2.2236	0.449722	0.0575605		0.000142278	0.00045683	0.0577889	0.66767		-0.34445	0	2.2236	0.449722	0.0575605		0.000142278	0.00045683	0.0577889	0.66767
						-0.171559	0.343993	2.17629	0.459498	0.0741627		3.925e-05	0.000618696	0.0744721	0.136		-0.158816	0.343993	2.17895	0.458938	0.0724691		4.17125e-05	0.000593559	0.0727658	0.150654		0	0.343993	2.22289	0.449864	0.0580174		0.000142278	0.00045683	0.0582458	0.66767		-0.343993	0	2.22289	0.449864	0.0580174		0.000142278	0.00045683	0.0582458	0.66767
						-0.171977	0.343536	2.1761	0.459537	0.0747814		3.86642e-05	0.000618991	0.0750909	0.133907		-0.159195	0.343536	2.17875	0.458979	0.0730626		4.17197e-05	0.000593661	0.0733594	0.150654		0	0.343536	2.22219	0.450007	0.0584742		0.000142278	0.00045683	0.0587026	0.66767		-0.343536	0	2.22219	0.450007	0.0584742		0.000142278	0.00045683	0.0587026	0.66767
						-0.172394	0.343079	2.17592	0.459575	0.0754004		3.61683e-05	0.000619293	0.0757101	0.125202		-0.159574	0.343079	2.17855	0.459021	0.0736563		4.1727e-05	0.000593765	0.0739532	0.150654		0	0.343079	2.22149	0.450149	0.058931		0.000142278	0.00045683	0.0591594	0.66767		-0.343079	0	2.22149	0.450149	0.058931		0.000142278	0.00045683	0.0591594	0.66767
						-0.172812	0.342622	2.17575	0.459612	0.0760197		3.61865e-05	0.000619603	0.0763295	0.125202		-0.159954	0.342622	2.17835	0.459063	0.07425		4.17343e-05	0.00059387	0.074547	0.150653		0	0.342622	2.22078	0.450291	0.0593878		0.000142278	0.00045683	0.0596163	0.66767		-0.342622	0	2.22078	0.450291	0.0593878		0.000142278	0.00045683	0.0596163	0.66767
						-0.173231	0.342165	2.17558	0.459648	0.0766393		3.62052e-05	0.00061992	0.0769493	0.125202		-0.160333	0.342165	2.17815	0.459104	0.0748439		4.17417e-05	0.000593976	0.0751409	0.150653		0	0.342165	2.22008	0.450434	0.0598447		0.000142278	0.00045683	0.0600731	0.66767		-0.342165	0	2.22008	0.450434	0.0598447		0.000142278	0.00045683	0.0600731	0.66767
						-0.17365	0.341709	2.17541	0.459684	0.0772592		3.65762e-05	0.000620246	0.0775693	0.126419		-0.160713	0.341709	2.17796	0.459146	0.0754379		3.97089e-05	0.000594084	0.0757349	0.14329		0	0.341709	2.21938	0.450576	0.0603015		0.0001227	0.00045683	0.0605299	0.575796		-0.341709	0	2.21938	0.450576	0.0603015		0.0001227	0.00045683	0.0605299	0.575796
						-0.17407	0.341252	2.17523	0.459721	0.0778795		3.65948e-05	0.000620563	0.0781897	0.126419		-0.161093	0.341252	2.17777	0.459186	0.076032		3.95571e-05	0.000594153	0.0763291	0.142726		0	0.341252	2.21878	0.450699	0.0607583		0.0001227	0.00045683	0.0609868	0.575796		-0.341252	0	2.21878	0.450699	0.0607583		0.0001227	0.00045683	0.0609868	0.575796
						-0.17449	0.340795	2.17506	0.459757	0.0785		3.52828e-05	0.000620888	0.0788105	0.121822		-0.161472	0.340795	2.17758	0.459225	0.0766261		3.95607e-05	0.000594206	0.0769232	0.142726		0	0.340795	2.21817	0.450821	0.0612152		0.0001227	0.00045683	0.0614436	0.575796		-0.340795	0	2.21817	0.450821	0.0612152		0.0001227	0.00045683	0.0614436	0.575796
						-0.17491	0.340338	2.17489	0.459793	0.0791209		3.37212e-05	0.00062122	0.0794315	0.116369		-0.161852	0.340338	2.17739	0.459265	0.0772203		3.95643e-05	0.000594259	0.0775175	0.142727		0	0.340338	2.21757	0.450944	0.061672		0.0001227	0.00045683	0.0619004	0.575796		-0.340338	0	2.21757	0.450944	0.061672		0.0001227	0.00045683	0.0619004	0.575796
						-0.175331	0.339881	2.17473	0.459826	0.0797421		3.37395e-05	0.00062156	0.0800529	0.116368		-0.162232	0.339881	2.1772	0.459305	0.0778146		3.95679e-05	0.000594313	0.0781118	0.142727		0	0.339881	2.21697	0.451067	0.0621288		0.0001227	0.00045683	0.0623572	0.575796		-0.339881	0	2.21697	0.451067	0.0621288		0.0001227	0.00045683	0.0623572	0.575796
						-0.175753	0.339424	2.17458	0.45986	0.0803637		3.42881e-05	0.000621908	0.0806747	0.118194		-0.162613	0.339424	2.17702	0.459344	0.0784089		3.95715e-05	0.000594367	0.0787061	0.142727		0	0.339424	2.21636	0.451189	0.0625857		0.0001227	0.00045683	0.0628141	0.575796		-0.339424	0	2.21636	0.451189	0.0625857		0.0001227	0.00045683	0.0628141	0.575796
						-0.176175	0.338968	2.17441	0.459894	0.0809856		3.45326e-05	0.000622208	0.0812967	0.118979		-0.162993	0.338968	2.17683	0.459384	0.0790033		3.67938e-05	0.000594421	0.0793005	0.132696		0	0.338968	2.21576	0.451312	0.0630425		0.0001227	0.00045683	0.0632709	0.575796		-0.338968	0	2.21576	0.451312	0.0630425		0.0001227	0.00045683	0.0632709	0.575796
						-0.176597	0.338511	2.17425	0.459929	0.0816078		3.45485e-05	0.000622492	0.0819191	0.11898		-0.163373	0.338511	2.17666	0.45942	0.0795977		3.64398e-05	0.000594475	0.0798949	0.131407		0	0.338511	2.21516	0.451435	0.0634993		0.0001227	0.00045683	0.0637277	0.575796		-0.338511	0	2.21516	0.451435	0.0634993		0.0001227	0.00045683	0.0637277	0.575796
						-0.17702	0.338054	2.17409	0.459963	0.0822303		3.25345e-05	0.000622783	0.0825417	0.111991		-0.163754	0.338054	2.17648	0.459457	0.0801922		3.64432e-05	0.00059453	0.0804894	0.131407		0	0.338054	2.21456	0.451557	0.0639561		0.0001227	0.00045683	0.0641846	0.575796		-0.338054	0	2.21456	0.451557	0.0639561		0.0001227	0.00045683	0.0641846	0.575796
						-0.177443	0.337597	2.17393	0.459996	0.0828531		3.18315e-05	0.000623081	0.0831646	0.109519		-0.164134	0.337597	2.17631	0.459493	0.0807867		3.64465e-05	0.000594584	0.081084	0.131407		0	0.337597	2.21396	0.45168	0.064413		0.0001227	0.00045683	0.0646414	0.575796		-0.337597	0	2.21396	0.45168	0.064413		0.0001227	0.00045683	0.0646414	0.575796
						-0.177867	0.33714	2.17378	0.460028	0.0834762		3.18472e-05	0.000623387	0.0837879	0.10952		-0.164515	0.33714	2.17614	0.45953	0.0813813		3.64499e-05	0.000594639	0.0816786	0.131407		0	0.33714	2.21335	0.451803	0.0648698		0.0001227	0.00045683	0.0650982	0.575796		-0.33714	0	2.21335	0.451803	0.0648698		0.0001227	0.00045683	0.0650982	0.575796
						-0.178291	0.336683	2.17363	0.46006	0.0840996		3.22444e-05	0.000623701	0.0844114	0.110829		-0.164895	0.336683	2.17596	0.459566	0.0819759		3.67758e-05	0.000594694	0.0822733	0.13257		0	0.336683	2.21275	0.451926	0.0653266		0.000106859	0.00045683	0.065555	0.501459		-0.336683	0	2.21275	0.451926	0.0653266		0.000106859	0.00045683	0.065555	0.501459
						-0.178716	0.336227	2.17348	0.460092	0.0847233		3.22605e-05	0.000624014	0.0850353	0.110829		-0.165276	0.336227	2.17579	0.459603	0.0825706		3.42075e-05	0.000594765	0.082868	0.123297		0	0.336227	2.21223	0.452032	0.0657835		0.000106859	0.00045683	0.0660119	0.501459		-0.336227	0	2.21223	0.452032	0.0657835		0.000106859	0.00045683	0.0660119	0.501459
						-0.179141	0.33577	2.17333	0.460124	0.0853473		3.21826e-05	0.000624335	0.0856594	0.110505		-0.165657	0.33577	2.17563	0.459637	0.0831654		3.43038e-05	0.000594836	0.0834628	0.12363		0	0.33577	2.21171	0.452139	0.0662403		0.000106859	0.00045683	0.0664687	0.501459		-0.33577	0	2.21171	0.452139	0.0662403		0.000106859	0.00045683	0.0664687	0.501459
						-0.179566	0.335313	2.17317	0.460156	0.0859716		2.97136e-05	0.000624663	0.0862839	0.101974		-0.166038	0.335313	2.17547	0.459672	0.0837602		3.46578e-05	0.000594873	0.0840577	0.124898		0	0.335313	2.21119	0.452246	0.0666971		0.000106859	0.00045683	0.0669255	0.501459		-0.335313	0	2.21119	0.452246	0.0666971		0.000106859	0.00045683	0.0669255	0.501459
						-0.179992	0.334856	2.17303	0.460186	0.0865963		2.97294e-05	0.000624999	0.0869088	0.101973		-0.166419	0.334856	2.1753	0.459706	0.0843551		3.46584e-05	0.000594882	0.0846525	0.124898		0	0.334856	2.21066	0.452353	0.067154		0.000106859	0.00045683	0.0673824	0.501459		-0.334856	0	2.21066	0.452353	0.067154		0.000106859	0.00045683	0.0673824	0.501459
						-0.180419	0.334399	2.17289	0.460216	0.0872213		2.97456e-05	0.000625342	0.0875339	0.101972		-0.1668	0.334399	2.17514	0.459741	0.08495		3.46589e-05	0.000594891	0.0852474	0.124898		0	0.334399	2.21014	0.45246	0.0676108		0.000106859	0.00045683	0.0678392	0.501459		-0.334399	0	2.21014	0.45246	0.0676108		0.000106859	0.00045683	0.0678392	0.501459
						-0.180846	0.333942	2.17275	0.460245	0.0878466		3.03694e-05	0.000625694	0.0881595	0.104052		-0.167181	0.333942	2.17497	0.459776	0.0855449		3.46593e-05	0.000594898	0.0858423	0.124898		0	0.333942	2.20962	0.452567	0.0680676		0.000106859	0.00045683	0.068296	0.501459		-0.333942	0	2.20962	0.452567	0.0680676		0.000106859	0.00045683	0.068296	0.501459
						-0.181273	0.333486	2.17261	0.460276	0.0884723		3.04803e-05	0.000625986	0.0887853	0.104384		-0.167562	0.333486	2.17481	0.45981	0.0861398		3.22244e-05	0.000594905	0.0864372	0.116122		0	0.333486	2.2091	0.452674	0.0685244		0.000106859	0.00045683	0.0687529	0.501459		-0.333486	0	2.2091	0.452674	0.0685244		0.000106859	0.00045683	0.0687529	0.501459
						-0.181701	0.333029	2.17247	0.460306	0.0890983		2.96334e-05	0.000626275	0.0894114	0.101437		-0.167943	0.333029	2.17466	0.459842	0.0867347		3.19155e-05	0.000594911	0.0870321	0.115008		0	0.333029	2.20858	0.45278	0.0689813		0.000106859	0.00045683	0.0692097	0.501459		-0.333029	0	2.20858	0.45278	0.0689813		0.000106859	0.00045683	0.0692097	0.501459
						-0.18213	0.332572	2.17233	0.460336	0.0897246		2.80622e-05	0.00062657	0.0900379	0.0960129		-0.168324	0.332572	2.17451	0.459874	0.0873296		3.19158e-05	0.000594916	0.087627	0.115008		0	0.332572	2.20805	0.452887	0.0694381		0.000106859	0.00045683	0.0696665	0.501459		-0.332572	0	2.20805	0.452887	0.0694381		0.000106859	0.00045683	0.0696665	0.501459
						-0.182559	0.332115	2.17219	0.460364	0.0903511		2.80759e-05	0.000626874	0.0906646	0.0960134		-0.168705	0.332115	2.17436	0.459906	0.0879245		3.1916e-05	0.000594921	0.088222	0.115008		0	0.332115	2.20753	0.452994	0.0698949		0.000106859	0.00045683	0.0701233	0.501459		-0.332115	0	2.20753	0.452994	0.0698949		0.000106859	0.00045683	0.0701233	0.501459
						-0.182988	0.331658	2.17206	0.460392	0.090978		2.84888e-05	0.000627185	0.0912916	0.097377		-0.169086	0.331658	2.17421	0.459938	0.0885194		3.22697e-05	0.000594924	0.0888169	0.116282		0	0.331658	2.20701	0.453101	0.0703518		9.38616e-05	0.00045683	0.0705802	0.440465		-0.331658	0	2.20701	0.453101	0.0703518		9.38616e-05	0.00045683	0.0705802	0.440465
						-0.183418	0.331201	2.17193	0.460421	0.0916052		2.85032e-05	0.000627502	0.0919189	0.0973768		-0.169468	0.331201	2.17405	0.45997	0.0891143		3.2271e-05	0.000594947	0.0894118	0.116282		0	0.331201	2.20656	0.453195	0.0708086		9.38616e-05	0.00045683	0.071037	0.440465		-0.331201	0	2.20656	0.453195	0.0708086		9.38616e-05	0.00045683	0.071037	0.440465
						-0.183848	0.330745	2.17179	0.460449	0.0922327		2.85179e-05	0.000627827	0.0925466	0.0973765		-0.169849	0.330745	2.1739	0.460003	0.0897093		2.99972e-05	0.00059497	0.0900068	0.108085		0	0.330745	2.2061	0.453289	0.0712654		9.38616e-05	0.00045683	0.0714938	0.440465		-0.330745	0	2.2061	0.453289	0.0712654		9.38616e-05	0.00045683	0.0714938	0.440465
						-0.184279	0.330288	2.17166	0.460478	0.0928605		2.69541e-05	0.00062816	0.0931746	0.0919883		-0.17023	0.330288	2.17376	0.460033	0.0903043		2.97179e-05	0.000594991	0.0906018	0.107074		0	0.330288	2.20564	0.453383	0.0717222		9.38616e-05	0.00045683	0.0719507	0.440465		-0.330288	0	2.20564	0.453383	0.0717222		9.38616e-05	0.00045683	0.0719507	0.440465
						-0.18471	0.329831	2.17153	0.460505	0.0934887		2.62388e-05	0.0006285	0.0938029	0.0894987		-0.170611	0.329831	2.17362	0.460062	0.0908992		2.99747e-05	0.000595011	0.0911968	0.107996		0	0.329831	2.20519	0.453476	0.0721791		9.38616e-05	0.00045683	0.0724075	0.440465		-0.329831	0	2.20519	0.453476	0.0721791		9.38616e-05	0.00045683	0.0724075	0.440465
						-0.185141	0.329374	2.17141	0.460531	0.0941172		2.62532e-05	0.000628848	0.0944316	0.0894982		-0.170992	0.329374	2.17348	0.460092	0.0914943		3.04253e-05	0.000595009	0.0917918	0.10962		0	0.329374	2.20473	0.45357	0.0726359		9.38616e-05	0.00045683	0.0728643	0.440465		-0.329374	0	2.20473	0.45357	0.0726359		9.38616e-05	0.00045683	0.0728643	0.440465
						-0.185574	0.328917	2.17128	0.460557	0.094746		2.63845e-05	0.000629205	0.0950606	0.0898949		-0.171374	0.328917	2.17333	0.460123	0.0920893		3.04232e-05	0.00059497	0.0923868	0.10962		0	0.328917	2.20427	0.453664	0.0730927		9.38616e-05	0.00045683	0.0733212	0.440465		-0.328917	0	2.20427	0.453664	0.0730927		9.38616e-05	0.00045683	0.0733212	0.440465
						-0.186006	0.32846	2.17116	0.460583	0.0953752		2.69425e-05	0.000629556	0.09569	0.0917445		-0.171755	0.32846	2.17319	0.460153	0.0926842		3.04211e-05	0.000594928	0.0929817	0.109619		0	0.32846	2.20382	0.453758	0.0735496		9.38616e-05	0.00045683	0.073778	0.440465		-0.32846	0	2.20382	0.453758	0.0735496		9.38616e-05	0.00045683	0.073778	0.440465
						-0.186439	0.328004	2.17103	0.46061	0.0960048		2.68821e-05	0.000629852	0.0963197	0.091496		-0.172136	0.328004	2.17305	0.460184	0.0932792		2.82544e-05	0.000594884	0.0935766	0.101819		0	0.328004	2.20336	0.453852	0.0740064		9.38616e-05	0.00045683	0.0742348	0.440465		-0.328004	0	2.20336	0.453852	0.0740064		9.38616e-05	0.00045683	0.0742348	0.440465
						-0.186873	0.327547	2.17091	0.460637	0.0966346		2.47705e-05	0.000630155	0.0969497	0.0842685		-0.172517	0.327547	2.17291	0.460212	0.0938741		2.79952e-05	0.000594839	0.0941715	0.100893		0	0.327547	2.20291	0.453946	0.0744632		9.38616e-05	0.00045683	0.0746916	0.440465		-0.327547	0	2.20291	0.453946	0.0744632		9.38616e-05	0.00045683	0.0746916	0.440465
						-0.187307	0.32709	2.17079	0.460662	0.0972648		2.47829e-05	0.000630466	0.09758	0.084269		-0.172898	0.32709	2.17278	0.46024	0.0944689		2.79929e-05	0.000594792	0.0947663	0.100893		0	0.32709	2.20245	0.45404	0.0749201		9.38616e-05	0.00045683	0.0751485	0.440465		-0.32709	0	2.20245	0.45404	0.0749201		9.38616e-05	0.00045683	0.0751485	0.440465
						-0.187742	0.326633	2.17067	0.460687	0.0978953		2.5205e-05	0.000630785	0.0982107	0.085661		-0.173279	0.326633	2.17265	0.460268	0.0950637		2.83645e-05	0.000594742	0.0953611	0.102241		0	0.326633	2.202	0.454133	0.0753769		8.30669e-05	0.00045683	0.0756053	0.389808		-0.326633	0	2.202	0.454133	0.0753769		8.30669e-05	0.00045683	0.0756053	0.389808
						-0.188176	0.326176	2.17055	0.460712	0.0985261		2.52181e-05	0.000631115	0.0988416	0.0856608		-0.17366	0.326176	2.17251	0.460296	0.0956584		2.83632e-05	0.000594716	0.0959558	0.102241		0	0.326176	2.20159	0.454217	0.0758337		8.30669e-05	0.00045683	0.0760621	0.389808		-0.326176	0	2.20159	0.454217	0.0758337		8.30669e-05	0.00045683	0.0760621	0.389808
						-0.188612	0.32572	2.17043	0.460737	0.0991572		2.52316e-05	0.000631453	0.0994729	0.0856605		-0.17404	0.32572	2.17238	0.460325	0.0962531		2.83619e-05	0.000594687	0.0965505	0.102241		0	0.32572	2.20119	0.4543	0.0762905		8.30669e-05	0.00045683	0.076519	0.389808		-0.32572	0	2.20119	0.4543	0.0762905		8.30669e-05	0.00045683	0.076519	0.389808
						-0.189048	0.325263	2.17032	0.460762	0.0997886		2.44128e-05	0.000631799	0.100105	0.0828354		-0.174421	0.325263	2.17225	0.460353	0.0968478		2.63324e-05	0.000594656	0.0971452	0.0949295		0	0.325263	2.20079	0.454383	0.0767474		8.30669e-05	0.00045683	0.0769758	0.389808		-0.325263	0	2.20079	0.454383	0.0767474		8.30669e-05	0.00045683	0.0769758	0.389808
						-0.189484	0.324806	2.1702	0.460787	0.10042		2.31743e-05	0.000632153	0.100736	0.0785888		-0.174802	0.324806	2.17212	0.460379	0.0974425		2.60933e-05	0.000594624	0.0977398	0.094073		0	0.324806	2.20039	0.454466	0.0772042		8.30669e-05	0.00045683	0.0774326	0.389808		-0.324806	0	2.20039	0.454466	0.0772042		8.30669e-05	0.00045683	0.0774326	0.389808
						-0.189921	0.324349	2.17009	0.46081	0.101053		2.31874e-05	0.000632517	0.101369	0.0785884		-0.175182	0.324349	2.172	0.460405	0.0980371		2.60918e-05	0.000594589	0.0983344	0.0940731		0	0.324349	2.19998	0.454549	0.077661		8.30669e-05	0.00045683	0.0778894	0.389808		-0.324349	0	2.19998	0.454549	0.077661		8.30669e-05	0.00045683	0.0778894	0.389808
						-0.190359	0.323892	2.16998	0.460833	0.101685		2.3201e-05	0.000632889	0.102002	0.078588		-0.175563	0.323892	2.17188	0.460431	0.0986317		2.6199e-05	0.000594551	0.098929	0.0944656		0	0.323892	2.19958	0.454632	0.0781179		8.30669e-05	0.00045683	0.0783463	0.389808		-0.323892	0	2.19958	0.454632	0.0781179		8.30669e-05	0.00045683	0.0783463	0.389808
						-0.190797	0.323435	2.16987	0.460856	0.102318		2.36139e-05	0.00063327	0.102635	0.0799384		-0.175944	0.323435	2.17175	0.460458	0.0992262		2.67341e-05	0.000594502	0.0995235	0.0964026		0	0.323435	2.19918	0.454715	0.0785747		8.30669e-05	0.00045683	0.0788031	0.389808		-0.323435	0	2.19918	0.454715	0.0785747		8.30669e-05	0.00045683	0.0788031	0.389808
						-0.191235	0.322979	2.16976	0.46088	0.102951		2.38517e-05	0.000633611	0.103268	0.0807001		-0.176324	0.322979	2.17163	0.460484	0.0998207		2.67296e-05	0.000594406	0.100118	0.0964023		0	0.322979	2.19878	0.454798	0.0790315		8.30669e-05	0.00045683	0.0792599	0.389808		-0.322979	0	2.19878	0.454798	0.0790315		8.30669e-05	0.00045683	0.0792599	0.389808
						-0.191674	0.322522	2.16965	0.460904	0.103585		2.23028e-05	0.000633932	0.103902	0.0754214		-0.176704	0.322522	2.1715	0.460511	0.100415		2.47995e-05	0.000594307	0.100712	0.089456		0	0.322522	2.19838	0.454881	0.0794884		8.30669e-05	0.00045683	0.0797168	0.389808		-0.322522	0	2.19838	0.454881	0.0794884		8.30669e-05	0.00045683	0.0797168	0.389808
						-0.192114	0.322065	2.16954	0.460926	0.104219		2.1883e-05	0.000634262	0.104536	0.0739631		-0.177084	0.322065	2.17138	0.460536	0.101009		2.45666e-05	0.000594205	0.101307	0.0886313		0	0.322065	2.19798	0.454964	0.0799452		8.30669e-05	0.00045683	0.0801736	0.389808		-0.322065	0	2.19798	0.454964	0.0799452		8.30669e-05	0.00045683	0.0801736	0.389808
						-0.192554	0.321608	2.16944	0.460948	0.104853		2.23102e-05	0.000634601	0.10517	0.0753668		-0.177464	0.321608	2.17127	0.460561	0.101604		2.49493e-05	0.0005941	0.101901	0.090028		0	0.321608	2.19757	0.455047	0.080402		7.40064e-05	0.00045683	0.0806304	0.34729		-0.321608	0	2.19757	0.455047	0.080402		7.40064e-05	0.00045683	0.0806304	0.34729
						-0.192994	0.321151	2.16934	0.46097	0.105488		2.23226e-05	0.000634955	0.105805	0.0753666		-0.177844	0.321151	2.17115	0.460585	0.102198		2.4946e-05	0.000594019	0.102495	0.090028		0	0.321151	2.19722	0.455121	0.0808588		7.40064e-05	0.00045683	0.0810873	0.34729		-0.321151	0	2.19722	0.455121	0.0808588		7.40064e-05	0.00045683	0.0810873	0.34729
						-0.193435	0.320694	2.16923	0.460993	0.106123		2.23352e-05	0.000635317	0.10644	0.0753664		-0.178224	0.320694	2.17103	0.46061	0.102792		2.49425e-05	0.000593935	0.103089	0.090028		0	0.320694	2.19686	0.455195	0.0813157		7.40064e-05	0.00045683	0.0815441	0.34729		-0.320694	0	2.19686	0.455195	0.0813157		7.40064e-05	0.00045683	0.0815441	0.34729
						-0.193877	0.320238	2.16913	0.461015	0.106758		2.19969e-05	0.000635688	0.107076	0.0741813		-0.178603	0.320238	2.17091	0.460635	0.103386		2.49388e-05	0.000593848	0.103683	0.090028		0	0.320238	2.1965	0.455269	0.0817725		7.40064e-05	0.00045683	0.0820009	0.34729		-0.320238	0	2.1965	0.455269	0.0817725		7.40064e-05	0.00045683	0.0820009	0.34729
						-0.194319	0.319781	2.16902	0.461037	0.107394		2.04617e-05	0.000636069	0.107712	0.0689629		-0.178983	0.319781	2.1708	0.46066	0.10398		2.31387e-05	0.000593758	0.104276	0.0835425		0	0.319781	2.19615	0.455343	0.0822293		7.40064e-05	0.00045683	0.0824577	0.34729		-0.319781	0	2.19615	0.455343	0.0822293		7.40064e-05	0.00045683	0.0824577	0.34729
						-0.194762	0.319324	2.16893	0.461057	0.10803		2.04742e-05	0.00063646	0.108348	0.0689625		-0.179362	0.319324	2.17069	0.460683	0.104573		2.29067e-05	0.000593664	0.10487	0.0827177		0	0.319324	2.19579	0.455417	0.0826862		7.40064e-05	0.00045683	0.0829146	0.34729		-0.319324	0	2.19579	0.455417	0.0826862		7.40064e-05	0.00045683	0.0829146	0.34729
						-0.195205	0.318867	2.16883	0.461078	0.108666		2.0487e-05	0.000636861	0.108985	0.0689621		-0.179741	0.318867	2.17058	0.460706	0.105167		2.2903e-05	0.000593567	0.105464	0.0827179		0	0.318867	2.19543	0.455491	0.083143		7.40064e-05	0.00045683	0.0833714	0.34729		-0.318867	0	2.19543	0.455491	0.083143		7.40064e-05	0.00045683	0.0833714	0.34729
						-0.195648	0.31841	2.16873	0.461098	0.109303		2.06511e-05	0.000637272	0.109622	0.0694697		-0.18012	0.31841	2.17047	0.460729	0.105761		2.28991e-05	0.000593466	0.106057	0.082718		0	0.31841	2.19508	0.455565	0.0835998		7.40064e-05	0.00045683	0.0838282	0.34729		-0.31841	0	2.19508	0.455565	0.0835998		7.40064e-05	0.00045683	0.0838282	0.34729
						-0.196093	0.317953	2.16864	0.461119	0.10994		2.11083e-05	0.000637674	0.110259	0.0709631		-0.180499	0.317953	2.17036	0.460752	0.106354		2.28951e-05	0.000593362	0.106651	0.0827182		0	0.317953	2.19472	0.455639	0.0840566		7.40064e-05	0.00045683	0.0842851	0.34729		-0.317953	0	2.19472	0.455639	0.0840566		7.40064e-05	0.00045683	0.0842851	0.34729
						-0.196538	0.317497	2.16854	0.46114	0.110578		2.00165e-05	0.000638027	0.110897	0.0672552		-0.180878	0.317497	2.17026	0.460775	0.106947		2.34431e-05	0.000593253	0.107244	0.0847133		0	0.317497	2.19436	0.455713	0.0845135		7.40064e-05	0.00045683	0.0847419	0.34729		-0.317497	0	2.19436	0.455713	0.0845135		7.40064e-05	0.00045683	0.0847419	0.34729
						-0.196983	0.31704	2.16844	0.46116	0.111216		1.93085e-05	0.00063839	0.111535	0.0648396		-0.181256	0.31704	2.17015	0.460798	0.107541		2.17905e-05	0.000593095	0.107837	0.0787626		0	0.31704	2.19401	0.455787	0.0849703		7.40064e-05	0.00045683	0.0851987	0.34729		-0.31704	0	2.19401	0.455787	0.0849703		7.40064e-05	0.00045683	0.0851987	0.34729
						-0.197429	0.316583	2.16835	0.46118	0.111854		1.97384e-05	0.000638764	0.112174	0.0662444		-0.181634	0.316583	2.17004	0.46082	0.108134		2.19369e-05	0.000592928	0.10843	0.0793141		0	0.316583	2.19365	0.455861	0.0854271		6.63303e-05	0.00045683	0.0856556	0.311269		-0.316583	0	2.19365	0.455861	0.0854271		6.63303e-05	0.00045683	0.0856556	0.311269
						-0.197875	0.316126	2.16826	0.461199	0.112493		1.97504e-05	0.000639155	0.112813	0.0662442		-0.182012	0.316126	2.16994	0.460842	0.108727		2.19317e-05	0.000592787	0.109023	0.0793141		0	0.316126	2.19333	0.455928	0.085884		6.63303e-05	0.00045683	0.0861124	0.311269		-0.316126	0	2.19333	0.455928	0.085884		6.63303e-05	0.00045683	0.0861124	0.311269
						-0.198322	0.315669	2.16817	0.461219	0.113132		1.97628e-05	0.000639557	0.113452	0.066244		-0.18239	0.315669	2.16984	0.460864	0.109319		2.19263e-05	0.000592641	0.109616	0.079314		0	0.315669	2.19301	0.455994	0.0863408		6.63303e-05	0.00045683	0.0865692	0.311269		-0.315669	0	2.19301	0.455994	0.0863408		6.63303e-05	0.00045683	0.0865692	0.311269
						-0.19877	0.315212	2.16807	0.461239	0.113772		1.96973e-05	0.000639969	0.114092	0.0659821		-0.182768	0.315212	2.16973	0.460886	0.109912		2.19207e-05	0.000592492	0.110208	0.079314		0	0.315212	2.19269	0.45606	0.0867976		6.63303e-05	0.00045683	0.087026	0.311269		-0.315212	0	2.19269	0.45606	0.0867976		6.63303e-05	0.00045683	0.087026	0.311269
						-0.199218	0.314756	2.16798	0.461258	0.114412		1.80419e-05	0.000640393	0.114732	0.0603966		-0.183145	0.314756	2.16963	0.460908	0.110505		2.1915e-05	0.000592337	0.110801	0.0793139		0	0.314756	2.19237	0.456127	0.0872545		6.63303e-05	0.00045683	0.0874829	0.311269		-0.314756	0	2.19237	0.456127	0.0872545		6.63303e-05	0.00045683	0.0874829	0.311269
						-0.199667	0.314299	2.1679	0.461277	0.115052		1.8054e-05	0.000640828	0.115373	0.0603963		-0.183522	0.314299	2.16953	0.46093	0.111097		2.0356e-05	0.000592178	0.111393	0.0736915		0	0.314299	2.19205	0.456193	0.0877113		6.63303e-05	0.00045683	0.0879397	0.311269		-0.314299	0	2.19205	0.456193	0.0877113		6.63303e-05	0.00045683	0.0879397	0.311269
						-0.200116	0.313842	2.16781	0.461295	0.115693		1.80665e-05	0.000641275	0.116014	0.0603959		-0.183899	0.313842	2.16943	0.46095	0.111689		2.00806e-05	0.000592014	0.111985	0.0727149		0	0.313842	2.19174	0.456259	0.0881681		6.63303e-05	0.00045683	0.0883965	0.311269		-0.313842	0	2.19174	0.456259	0.0881681		6.63303e-05	0.00045683	0.0883965	0.311269
						-0.200566	0.313385	2.16773	0.461313	0.116334		1.80947e-05	0.000641734	0.116655	0.0604468		-0.184275	0.313385	2.16934	0.46097	0.112281		2.00749e-05	0.000591844	0.112577	0.0727151		0	0.313385	2.19142	0.456326	0.0886249		6.63303e-05	0.00045683	0.0888534	0.311269		-0.313385	0	2.19142	0.456326	0.0886249		6.63303e-05	0.00045683	0.0888534	0.311269
						-0.201017	0.312928	2.16764	0.461331	0.116976		1.86648e-05	0.000642204	0.117297	0.0623057		-0.184652	0.312928	2.16924	0.46099	0.112873		2.00691e-05	0.00059167	0.113169	0.0727152		0	0.312928	2.1911	0.456392	0.0890818		6.63303e-05	0.00045683	0.0893102	0.311269		-0.312928	0	2.1911	0.456392	0.0890818		6.63303e-05	0.00045683	0.0893102	0.311269
						-0.201469	0.312471	2.16755	0.461349	0.117618		1.78276e-05	0.000642608	0.11794	0.0594735		-0.185028	0.312471	2.16915	0.46101	0.113465		2.0063e-05	0.000591491	0.11376	0.0727153		0	0.312471	2.19078	0.456458	0.0895386		6.63303e-05	0.00045683	0.089767	0.311269		-0.312471	0	2.19078	0.456458	0.0895386		6.63303e-05	0.00045683	0.089767	0.311269
						-0.20192	0.312015	2.16747	0.461367	0.118261		1.70052e-05	0.000643024	0.118582	0.0566934		-0.185403	0.312015	2.16905	0.461031	0.114056		2.00568e-05	0.000591306	0.114352	0.0727154		0	0.312015	2.19046	0.456525	0.0899954		6.63303e-05	0.00045683	0.0902238	0.311269		-0.312015	0	2.19046	0.456525	0.0899954		6.63303e-05	0.00045683	0.0902238	0.311269
						-0.202373	0.311558	2.16739	0.461384	0.118904		1.74364e-05	0.000643453	0.119226	0.0580922		-0.185779	0.311558	2.16896	0.461051	0.114647		1.9352e-05	0.000591115	0.114943	0.0701828		0	0.311558	2.19014	0.456591	0.0904523		5.97728e-05	0.00045683	0.0906807	0.280496		-0.311558	0	2.19014	0.456591	0.0904523		5.97728e-05	0.00045683	0.0906807	0.280496
						-0.202826	0.311101	2.16731	0.461402	0.119547		1.74485e-05	0.000643903	0.119869	0.058092		-0.186154	0.311101	2.16887	0.46107	0.115239		1.92503e-05	0.000590923	0.115534	0.0698366		0	0.311101	2.18986	0.456651	0.0909091		5.97728e-05	0.00045683	0.0911375	0.280496		-0.311101	0	2.18986	0.456651	0.0909091		5.97728e-05	0.00045683	0.0911375	0.280496
						-0.20328	0.310644	2.16723	0.461419	0.120191		1.7461e-05	0.000644366	0.120513	0.0580917		-0.186529	0.310644	2.16878	0.461089	0.115829		1.92432e-05	0.000590707	0.116125	0.0698365		0	0.310644	2.18957	0.45671	0.0913659		5.97728e-05	0.00045683	0.0915943	0.280496		-0.310644	0	2.18957	0.45671	0.0913659		5.97728e-05	0.00045683	0.0915943	0.280496
						-0.203734	0.310187	2.16715	0.461437	0.120836		1.74738e-05	0.000644841	0.121158	0.0580915		-0.186903	0.310187	2.16869	0.461108	0.11642		1.92359e-05	0.000590485	0.116715	0.0698363		0	0.310187	2.18928	0.45677	0.0918228		5.97728e-05	0.00045683	0.0920512	0.280496		-0.310187	0	2.18928	0.45677	0.0918228		5.97728e-05	0.00045683	0.0920512	0.280496
						-0.204189	0.30973	2.16706	0.461454	0.12148		1.58904e-05	0.000645331	0.121803	0.0527872		-0.187277	0.30973	2.1686	0.461128	0.117011		1.92284e-05	0.000590256	0.117306	0.069836		0	0.30973	2.189	0.45683	0.0922796		5.97728e-05	0.00045683	0.092508	0.280496		-0.30973	0	2.189	0.45683	0.0922796		5.97728e-05	0.00045683	0.092508	0.280496
						-0.204645	0.309274	2.16699	0.46147	0.122126		1.58789e-05	0.000645835	0.122449	0.0527081		-0.187651	0.309274	2.16851	0.461147	0.117601		1.92207e-05	0.000590022	0.117896	0.0698358		0	0.309274	2.18871	0.45689	0.0927364		5.97728e-05	0.00045683	0.0929648	0.280496		-0.309274	0	2.18871	0.45689	0.0927364		5.97728e-05	0.00045683	0.0929648	0.280496
						-0.205102	0.308817	2.16691	0.461486	0.122772		1.58769e-05	0.000645757	0.123094	0.0527077		-0.188025	0.308817	2.16842	0.461166	0.118191		1.7937e-05	0.000589781	0.118486	0.0651985		0	0.308817	2.18843	0.45695	0.0931932		5.97728e-05	0.00045683	0.0934217	0.280496		-0.308817	0	2.18843	0.45695	0.0931932		5.97728e-05	0.00045683	0.0934217	0.280496
						-0.205559	0.30836	2.16684	0.461502	0.123417		1.58637e-05	0.000645226	0.12374	0.0527072		-0.188398	0.30836	2.16833	0.461184	0.118781		1.75531e-05	0.000589533	0.119075	0.0638298		0	0.30836	2.18814	0.457009	0.0936501		5.97728e-05	0.00045683	0.0938785	0.280496		-0.30836	0	2.18814	0.457009	0.0936501		5.97728e-05	0.00045683	0.0938785	0.280496
						-0.206015	0.307905	2.16676	0.461518	0.124063		1.63848e-05	0.000644683	0.124385	0.0544843		-0.18877	0.307903	2.16825	0.461202	0.11937		1.75455e-05	0.000589278	0.119665	0.0638298		0	0.307903	2.18785	0.457069	0.0941069		5.97728e-05	0.00045683	0.0943353	0.280496		-0.307903	0	2.18785	0.457069	0.0941069		5.97728e-05	0.00045683	0.0943353	0.280496
						-0.206472	0.30745	2.16669	0.461534	0.124707		1.56447e-05	0.000644206	0.125029	0.0520619		-0.189143	0.307446	2.16817	0.461219	0.11996		1.75377e-05	0.000589017	0.120254	0.0638298		0	0.307446	2.18757	0.457129	0.0945637		5.97728e-05	0.00045683	0.0947921	0.280496		-0.307446	0	2.18757	0.457129	0.0945637		5.97728e-05	0.00045683	0.0947921	0.280496
						-0.206929	0.306996	2.16661	0.46155	0.125351		1.48209e-05	0.000643719	0.125673	0.0493578		-0.189514	0.306989	2.16808	0.461237	0.120549		1.75297e-05	0.000588748	0.120843	0.0638298		0	0.306989	2.18728	0.457189	0.0950206		5.97728e-05	0.00045683	0.095249	0.280496		-0.306989	0	2.18728	0.457189	0.0950206		5.97728e-05	0.00045683	0.095249	0.280496
						-0.207386	0.306542	2.16654	0.461564	0.125995		1.52172e-05	0.00064322	0.126317	0.0507168		-0.189886	0.306533	2.168	0.461254	0.121137		1.79164e-05	0.000588472	0.121432	0.0652681		0	0.306533	2.18699	0.457248	0.0954774		5.4129e-05	0.00045683	0.0957058	0.254011		-0.306533	0	2.18699	0.457248	0.0954774		5.4129e-05	0.00045683	0.0957058	0.254011
						-0.207843	0.306089	2.16647	0.46158	0.126638		1.52135e-05	0.000642701	0.12696	0.0507455		-0.190257	0.306076	2.16792	0.461272	0.121726		1.67987e-05	0.000588222	0.12202	0.0612227		0	0.306076	2.18674	0.457303	0.0959342		5.4129e-05	0.00045683	0.0961626	0.254011		-0.306076	0	2.18674	0.457303	0.0959342		5.4129e-05	0.00045683	0.0961626	0.254011
						-0.2083	0.305637	2.1664	0.461595	0.127281		1.52008e-05	0.000642169	0.127602	0.0507452		-0.190627	0.305619	2.16784	0.461289	0.122314		1.63926e-05	0.000587964	0.122608	0.0597689		0	0.305619	2.18648	0.457357	0.096391		5.4129e-05	0.00045683	0.0966195	0.254011		-0.305619	0	2.18648	0.457357	0.096391		5.4129e-05	0.00045683	0.0966195	0.254011
						-0.208756	0.305186	2.16633	0.46161	0.127923		1.51878e-05	0.000641625	0.128244	0.0507449		-0.190997	0.305162	2.16776	0.461305	0.122902		1.68277e-05	0.000587694	0.123196	0.0613834		0	0.305162	2.18622	0.457411	0.0968479		5.4129e-05	0.00045683	0.0970763	0.254011		-0.305162	0	2.18622	0.457411	0.0968479		5.4129e-05	0.00045683	0.0970763	0.254011
						-0.209213	0.304735	2.16626	0.461625	0.128565		1.37546e-05	0.000641068	0.128885	0.045996		-0.191367	0.304705	2.16768	0.461322	0.12349		1.68185e-05	0.000587379	0.123783	0.0613829		0	0.304705	2.18596	0.457465	0.0973047		5.4129e-05	0.00045683	0.0975331	0.254011		-0.304705	0	2.18596	0.457465	0.0973047		5.4129e-05	0.00045683	0.0975331	0.254011
						-0.20967	0.304286	2.16619	0.461639	0.129206		1.36686e-05	0.000640497	0.129526	0.0457492		-0.191736	0.304249	2.1676	0.461339	0.124077		1.68091e-05	0.000587055	0.124371	0.0613824		0	0.304249	2.1857	0.457519	0.0977615		5.4129e-05	0.00045683	0.0979899	0.254011		-0.304249	0	2.1857	0.457519	0.0977615		5.4129e-05	0.00045683	0.0979899	0.254011
						-0.210127	0.303837	2.16613	0.461653	0.129846		1.36559e-05	0.000639912	0.130166	0.0457487		-0.192105	0.303792	2.16752	0.461356	0.124664		1.67995e-05	0.000586724	0.124957	0.0613818		0	0.303792	2.18544	0.457573	0.0982184		5.4129e-05	0.00045683	0.0984468	0.254011		-0.303792	0	2.18544	0.457573	0.0982184		5.4129e-05	0.00045683	0.0984468	0.254011
						-0.210584	0.303389	2.16607	0.461666	0.130486		1.3643e-05	0.000639313	0.130806	0.0457483		-0.192473	0.303335	2.16745	0.461373	0.125251		1.58472e-05	0.000586384	0.125544	0.057936		0	0.303335	2.18518	0.457627	0.0986752		5.4129e-05	0.00045683	0.0989036	0.254011		-0.303335	0	2.18518	0.457627	0.0986752		5.4129e-05	0.00045683	0.0989036	0.254011
						-0.211041	0.302941	2.166	0.46168	0.131126		1.41423e-05	0.000638699	0.131445	0.047468		-0.192841	0.302878	2.16737	0.461388	0.125837		1.52736e-05	0.000586035	0.12613	0.0558721		0	0.302878	2.18493	0.457681	0.099132		5.4129e-05	0.00045683	0.0993604	0.254011		-0.302878	0	2.18493	0.457681	0.099132		5.4129e-05	0.00045683	0.0993604	0.254011
						-0.211497	0.302495	2.16594	0.461694	0.131764		1.35783e-05	0.000638147	0.132083	0.0456144		-0.193208	0.302421	2.1673	0.461404	0.126423		1.52642e-05	0.000585676	0.126716	0.0558718		0	0.302421	2.18467	0.457736	0.0995889		5.4129e-05	0.00045683	0.0998173	0.254011		-0.302421	0	2.18467	0.457736	0.0995889		5.4129e-05	0.00045683	0.0998173	0.254011
						-0.211954	0.302049	2.16587	0.461708	0.132403		1.26983e-05	0.000637582	0.132721	0.042696		-0.193574	0.301964	2.16723	0.461419	0.127009		1.52545e-05	0.000585309	0.127302	0.0558715		0	0.301964	2.18441	0.45779	0.100046		5.4129e-05	0.00045683	0.100274	0.254011		-0.301964	0	2.18441	0.45779	0.100046		5.4129e-05	0.00045683	0.100274	0.254011
						-0.212411	0.301605	2.16581	0.46172	0.13304		1.30056e-05	0.000637002	0.133359	0.0437692		-0.19394	0.301508	2.16716	0.461434	0.127594		1.56431e-05	0.000584932	0.127887	0.0573319		0	0.301508	2.18415	0.457844	0.100503		4.92389e-05	0.00045683	0.100731	0.231064		-0.301508	0	2.18415	0.457844	0.100503		4.92389e-05	0.00045683	0.100731	0.231064
						-0.212868	0.301161	2.16575	0.461733	0.133677		1.30824e-05	0.000636402	0.133995	0.0440691		-0.194306	0.301051	2.16708	0.46145	0.128179		1.56339e-05	0.00058458	0.128471	0.0573324		0	0.301051	2.18392	0.457893	0.100959		4.92389e-05	0.00045683	0.101188	0.231064		-0.301051	0	2.18392	0.457893	0.100959		4.92389e-05	0.00045683	0.101188	0.231064
						-0.213325	0.300718	2.16569	0.461746	0.134314		1.30696e-05	0.000635785	0.134631	0.0440687		-0.19467	0.300594	2.16701	0.461466	0.128764		1.48819e-05	0.000584218	0.129056	0.0546085		0	0.300594	2.18368	0.457942	0.101416		4.92389e-05	0.00045683	0.101645	0.231064		-0.300594	0	2.18368	0.457942	0.101416		4.92389e-05	0.00045683	0.101645	0.231064
						-0.213782	0.300275	2.16563	0.46176	0.134949		1.30565e-05	0.000635153	0.135267	0.0440683		-0.195035	0.300137	2.16694	0.46148	0.129348		1.41819e-05	0.000583847	0.12964	0.0520731		0	0.300137	2.18345	0.457992	0.101873		4.92389e-05	0.00045683	0.102101	0.231064		-0.300137	0	2.18345	0.457992	0.101873		4.92389e-05	0.00045683	0.102101	0.231064
						-0.214238	0.299834	2.16557	0.461773	0.135584		1.19204e-05	0.000634505	0.135902	0.0402747		-0.195398	0.29968	2.16687	0.461495	0.129932		1.41729e-05	0.000583465	0.130224	0.0520741		0	0.29968	2.18321	0.458041	0.10233		4.92389e-05	0.00045683	0.102558	0.231064		-0.29968	0	2.18321	0.458041	0.10233		4.92389e-05	0.00045683	0.102558	0.231064
						-0.214695	0.299394	2.16551	0.461785	0.136219		1.16481e-05	0.00063384	0.136536	0.0393962		-0.195761	0.299223	2.16681	0.461509	0.130515		1.43474e-05	0.000583073	0.130807	0.0527508		0	0.299223	2.18298	0.45809	0.102787		4.92389e-05	0.00045683	0.103015	0.231064		-0.299223	0	2.18298	0.45809	0.102787		4.92389e-05	0.00045683	0.103015	0.231064
						-0.215152	0.298954	2.16546	0.461796	0.136853		1.16354e-05	0.000633158	0.137169	0.0393957		-0.196123	0.298767	2.16674	0.461523	0.131098		1.46169e-05	0.000582655	0.13139	0.0537799		0	0.298767	2.18274	0.458139	0.103243		4.92389e-05	0.00045683	0.103472	0.231064		-0.298767	0	2.18274	0.458139	0.103243		4.92389e-05	0.00045683	0.103472	0.231064
						-0.215609	0.298516	2.1654	0.461808	0.137486		1.16224e-05	0.000632458	0.137802	0.0393951		-0.196485	0.29831	2.16667	0.461538	0.131681		1.46052e-05	0.000582204	0.131972	0.0537788		0	0.29831	2.18251	0.458189	0.1037		4.92389e-05	0.00045683	0.103929	0.231064		-0.29831	0	2.18251	0.458189	0.1037		4.92389e-05	0.00045683	0.103929	0.231064
						-0.216066	0.298079	2.16535	0.461819	0.138118		1.21029e-05	0.00063174	0.138434	0.0410703		-0.196846	0.297853	2.1666	0.461552	0.132263		1.40646e-05	0.000581741	0.132554	0.0518294		0	0.297853	2.18227	0.458238	0.104157		4.92389e-05	0.00045683	0.104386	0.231064		-0.297853	0	2.18227	0.458238	0.104157		4.92389e-05	0.00045683	0.104386	0.231064
						-0.216523	0.297642	2.16529	0.461832	0.13875		1.18459e-05	0.000631077	0.139066	0.0402405		-0.197206	0.297396	2.16654	0.461566	0.132845		1.32008e-05	0.000581268	0.133136	0.0486856		0	0.297396	2.18204	0.458287	0.104614		4.92389e-05	0.00045683	0.104842	0.231064		-0.297396	0	2.18204	0.458287	0.104614		4.92389e-05	0.00045683	0.104842	0.231064
						-0.216979	0.297207	2.16524	0.461843	0.139381		1.07609e-05	0.000630398	0.139696	0.0365942		-0.197566	0.296939	2.16647	0.46158	0.133426		1.31895e-05	0.000580782	0.133717	0.0486848		0	0.296939	2.1818	0.458336	0.105071		4.92389e-05	0.00045683	0.105299	0.231064		-0.296939	0	2.1818	0.458336	0.105071		4.92389e-05	0.00045683	0.105299	0.231064
						-0.217436	0.296772	2.16519	0.461854	0.140012		1.08809e-05	0.0006297	0.140326	0.0370432		-0.197924	0.296482	2.16641	0.461593	0.134007		1.35793e-05	0.000580284	0.134297	0.0501664		0	0.296482	2.18157	0.458385	0.105528		4.4976e-05	0.00045683	0.105756	0.211059		-0.296482	0	2.18157	0.458385	0.105528		4.4976e-05	0.00045683	0.105756	0.211059
						-0.217893	0.296339	2.16513	0.461865	0.140641		1.11343e-05	0.000628981	0.140956	0.0379492		-0.198282	0.296026	2.16635	0.461606	0.134587		1.35683e-05	0.000579809	0.134877	0.0501668		0	0.296026	2.18136	0.45843	0.105984		4.4976e-05	0.00045683	0.106213	0.211059		-0.296026	0	2.18136	0.45843	0.105984		4.4976e-05	0.00045683	0.106213	0.211059
						-0.21835	0.295907	2.16508	0.461876	0.14127		1.1121e-05	0.00062824	0.141584	0.0379486		-0.198639	0.295569	2.16628	0.46162	0.135167		1.3557e-05	0.000579323	0.135457	0.0501672		0	0.295569	2.18114	0.458475	0.106441		4.4976e-05	0.00045683	0.10667	0.211059		-0.295569	0	2.18114	0.458475	0.106441		4.4976e-05	0.00045683	0.10667	0.211059
						-0.218807	0.295475	2.16503	0.461887	0.141899		1.11074e-05	0.00062748	0.142212	0.037948		-0.198995	0.295112	2.16622	0.461633	0.135746		1.32645e-05	0.000578823	0.136036	0.0491271		0	0.295112	2.18093	0.45852	0.106898		4.4976e-05	0.00045683	0.107127	0.211059		-0.295112	0	2.18093	0.45852	0.106898		4.4976e-05	0.00045683	0.107127	0.211059
						-0.219264	0.295045	2.16498	0.461898	0.142526		1.03948e-05	0.000626698	0.142839	0.0355579		-0.199351	0.294655	2.16616	0.461647	0.136325		1.22168e-05	0.00057831	0.136614	0.0452869		0	0.294655	2.18071	0.458565	0.107355		4.4976e-05	0.00045683	0.107583	0.211059		-0.294655	0	2.18071	0.458565	0.107355		4.4976e-05	0.00045683	0.107583	0.211059
						-0.21972	0.294616	2.16493	0.461909	0.143153		9.79392e-06	0.000625896	0.143466	0.0335453		-0.199705	0.294198	2.1661	0.461659	0.136904		1.22059e-05	0.000577785	0.137192	0.0452878		0	0.294198	2.1805	0.45861	0.107812		4.4976e-05	0.00045683	0.10804	0.211059		-0.294198	0	2.1805	0.45861	0.107812		4.4976e-05	0.00045683	0.10804	0.211059
						-0.220177	0.294188	2.16488	0.461919	0.143779		9.7808e-06	0.000625071	0.144091	0.0335446		-0.200059	0.293741	2.16604	0.461671	0.137481		1.21947e-05	0.000577245	0.13777	0.0452887		0	0.293741	2.18029	0.458655	0.108269		4.4976e-05	0.00045683	0.108497	0.211059		-0.293741	0	2.18029	0.458655	0.108269		4.4976e-05	0.00045683	0.108497	0.211059
						-0.220634	0.293762	2.16484	0.461928	0.144404		9.7673e-06	0.000624222	0.144716	0.0335438		-0.200412	0.293285	2.16599	0.461683	0.138059		1.21833e-05	0.000576692	0.138347	0.0452895		0	0.293285	2.18007	0.4587	0.108725		4.4976e-05	0.00045683	0.108954	0.211059		-0.293285	0	2.18007	0.4587	0.108725		4.4976e-05	0.00045683	0.108954	0.211059
						-0.221091	0.293336	2.16479	0.461938	0.145028		1.02314e-05	0.000623351	0.14534	0.035187		-0.200764	0.292828	2.16593	0.461696	0.138635		1.23057e-05	0.000576124	0.138923	0.0457896		0	0.292828	2.17986	0.458745	0.109182		4.4976e-05	0.00045683	0.109411	0.211059		-0.292828	0	2.17986	0.458745	0.109182		4.4976e-05	0.00045683	0.109411	0.211059
						-0.221548	0.292912	2.16474	0.461948	0.145651		1.02342e-05	0.000622527	0.145963	0.035243		-0.201115	0.292371	2.16587	0.461708	0.139211		1.25809e-05	0.000575531	0.139499	0.0468621		0	0.292371	2.17965	0.45879	0.109639		4.4976e-05	0.00045683	0.109868	0.211059		-0.292371	0	2.17965	0.45879	0.109639		4.4976e-05	0.00045683	0.109868	0.211059
						-0.222004	0.292489	2.1647	0.461959	0.146274		9.16588e-06	0.000621681	0.146585	0.0316071		-0.201465	0.291914	2.16581	0.46172	0.139787		1.1301e-05	0.000574902	0.140074	0.0421406		0	0.291914	2.17943	0.458835	0.110096		4.4976e-05	0.00045683	0.110324	0.211059		-0.291914	0	2.17943	0.458835	0.110096		4.4976e-05	0.00045683	0.110324	0.211059
						-0.222461	0.292068	2.16465	0.461968	0.146895		8.96527e-06	0.000620809	0.147206	0.0309587		-0.201814	0.291457	2.16576	0.461732	0.140362		1.16913e-05	0.000574257	0.140649	0.0436451		0	0.291457	2.17922	0.45888	0.110553		4.1239e-05	0.00045683	0.110781	0.193522		-0.291457	0	2.17922	0.45888	0.110553		4.1239e-05	0.00045683	0.110781	0.193522
						-0.222918	0.291647	2.16461	0.461977	0.147516		9.16276e-06	0.000619912	0.147826	0.0316865		-0.202162	0.291	2.1657	0.461743	0.140936		1.16787e-05	0.000573634	0.141223	0.0436451		0	0.291	2.17902	0.458921	0.11101		4.1239e-05	0.00045683	0.111238	0.193522		-0.291	0	2.17902	0.458921	0.11101		4.1239e-05	0.00045683	0.111238	0.193522
						-0.223375	0.291228	2.16457	0.461986	0.148136		9.32298e-06	0.000618988	0.148446	0.0322887		-0.202509	0.290544	2.16565	0.461755	0.14151		1.16656e-05	0.000572995	0.141796	0.0436451		0	0.290544	2.17883	0.458963	0.111466		4.1239e-05	0.00045683	0.111695	0.193522		-0.290544	0	2.17883	0.458963	0.111466		4.1239e-05	0.00045683	0.111695	0.193522
						-0.223832	0.290811	2.16452	0.461995	0.148755		9.30838e-06	0.000618037	0.149064	0.0322877		-0.202855	0.290087	2.1656	0.461767	0.142083		1.16523e-05	0.00057234	0.142369	0.043645		0	0.290087	2.17863	0.459004	0.111923		4.1239e-05	0.00045683	0.112152	0.193522		-0.290087	0	2.17863	0.459004	0.111923		4.1239e-05	0.00045683	0.112152	0.193522
						-0.224289	0.290394	2.16448	0.462004	0.149373		9.16571e-06	0.000617059	0.149682	0.0318432		-0.2032	0.28963	2.16554	0.461778	0.142655		1.16385e-05	0.000571668	0.142941	0.0436448		0	0.28963	2.17843	0.459045	0.11238		4.1239e-05	0.00045683	0.112608	0.193522		-0.28963	0	2.17843	0.459045	0.11238		4.1239e-05	0.00045683	0.112608	0.193522
						-0.224745	0.28998	2.16444	0.462014	0.14999		8.07746e-06	0.000616052	0.150298	0.0281083		-0.203543	0.289173	2.16549	0.46179	0.143227		1.07178e-05	0.00057098	0.143512	0.0402405		0	0.289173	2.17824	0.459086	0.112837		4.1239e-05	0.00045683	0.113065	0.193522		-0.289173	0	2.17824	0.459086	0.112837		4.1239e-05	0.00045683	0.113065	0.193522
						-0.225202	0.289566	2.1644	0.462022	0.150606		8.06357e-06	0.000615016	0.150914	0.0281073		-0.203886	0.288716	2.16544	0.461801	0.143798		1.03973e-05	0.000570275	0.144083	0.0390853		0	0.288716	2.17804	0.459128	0.113294		4.1239e-05	0.00045683	0.113522	0.193522		-0.288716	0	2.17804	0.459128	0.113294		4.1239e-05	0.00045683	0.113522	0.193522
						-0.225659	0.289155	2.16436	0.46203	0.151221		8.04923e-06	0.000613948	0.151528	0.0281061		-0.204227	0.288259	2.16539	0.461811	0.144368		1.03843e-05	0.000569553	0.144653	0.0390858		0	0.288259	2.17785	0.459169	0.113751		4.1239e-05	0.00045683	0.113979	0.193522		-0.288259	0	2.17785	0.459169	0.113751		4.1239e-05	0.00045683	0.113979	0.193522
						-0.226116	0.288744	2.16432	0.462038	0.151835		8.49903e-06	0.000612848	0.152142	0.02973		-0.204567	0.287803	2.16534	0.461822	0.144937		1.03709e-05	0.000568813	0.145222	0.0390862		0	0.287803	2.17765	0.45921	0.114207		4.1239e-05	0.00045683	0.114436	0.193522		-0.287803	0	2.17765	0.45921	0.114207		4.1239e-05	0.00045683	0.114436	0.193522
						-0.226573	0.288336	2.16429	0.462046	0.152448		8.50016e-06	0.000611786	0.152754	0.0297855		-0.204906	0.287346	2.16529	0.461832	0.145506		1.03571e-05	0.000568054	0.14579	0.0390865		0	0.287346	2.17746	0.459251	0.114664		4.1239e-05	0.00045683	0.114893	0.193522		-0.287346	0	2.17746	0.459251	0.114664		4.1239e-05	0.00045683	0.114893	0.193522
						-0.22703	0.287929	2.16425	0.462055	0.15306		8.12882e-06	0.000610693	0.153365	0.0285353		-0.205244	0.286889	2.16524	0.461842	0.146074		1.0343e-05	0.000567277	0.146358	0.0390867		0	0.286889	2.17726	0.459293	0.115121		4.1239e-05	0.00045683	0.115349	0.193522		-0.286889	0	2.17726	0.459293	0.115121		4.1239e-05	0.00045683	0.115349	0.193522
						-0.227486	0.287524	2.16421	0.462063	0.153671		7.30944e-06	0.000609565	0.153975	0.0257065		-0.20558	0.286432	2.16519	0.461853	0.146642		1.02254e-05	0.000566481	0.146925	0.0386967		0	0.286432	2.17707	0.459334	0.115578		3.79462e-05	0.00045683	0.115806	0.178071		-0.286432	0	2.17707	0.459334	0.115578		3.79462e-05	0.00045683	0.115806	0.178071
						-0.227943	0.28712	2.16417	0.46207	0.15428		7.29601e-06	0.0006084	0.154584	0.0257083		-0.205915	0.285975	2.16514	0.461863	0.147208		9.8057e-06	0.000565702	0.147491	0.0371594		0	0.285975	2.17689	0.459372	0.116035		3.79462e-05	0.00045683	0.116263	0.178071		-0.285975	0	2.17689	0.459372	0.116035		3.79462e-05	0.00045683	0.116263	0.178071
						-0.2284	0.286718	2.16414	0.462078	0.154889		7.38664e-06	0.000607199	0.155192	0.0260792		-0.206249	0.285519	2.1651	0.461873	0.147774		9.92358e-06	0.000564887	0.148056	0.0376603		0	0.285519	2.17671	0.45941	0.116492		3.79462e-05	0.00045683	0.11672	0.178071		-0.285519	0	2.17671	0.45941	0.116492		3.79462e-05	0.00045683	0.11672	0.178071
						-0.228857	0.286318	2.1641	0.462085	0.155496		7.63303e-06	0.000605961	0.155799	0.0270041		-0.206581	0.285062	2.16505	0.461883	0.148339		9.90853e-06	0.000564043	0.148621	0.0376595		0	0.285062	2.17653	0.459448	0.116948		3.79462e-05	0.00045683	0.117177	0.178071		-0.285062	0	2.17653	0.459448	0.116948		3.79462e-05	0.00045683	0.117177	0.178071
						-0.229314	0.28592	2.16407	0.462093	0.156102		7.61646e-06	0.000604688	0.156404	0.0270022		-0.206912	0.284605	2.16501	0.461892	0.148903		9.89308e-06	0.000563179	0.149184	0.0376585		0	0.284605	2.17635	0.459486	0.117405		3.79462e-05	0.00045683	0.117634	0.178071		-0.284605	0	2.17635	0.459486	0.117405		3.79462e-05	0.00045683	0.117634	0.178071
						-0.229771	0.285524	2.16403	0.4621	0.156706		7.10558e-06	0.000603376	0.157008	0.0252458		-0.207241	0.284148	2.16496	0.461902	0.149466		9.87723e-06	0.000562295	0.149747	0.0376572		0	0.284148	2.17617	0.459524	0.117862		3.79462e-05	0.00045683	0.11809	0.178071		-0.284148	0	2.17617	0.459524	0.117862		3.79462e-05	0.00045683	0.11809	0.178071
						-0.230227	0.28513	2.164	0.462107	0.15731		6.46097e-06	0.000602022	0.157611	0.0230072		-0.207569	0.283691	2.16491	0.461912	0.150028		9.80647e-06	0.00056139	0.150309	0.0374477		0	0.283691	2.17599	0.459562	0.118319		3.79462e-05	0.00045683	0.118547	0.178071		-0.283691	0	2.17599	0.459562	0.118319		3.79462e-05	0.00045683	0.118547	0.178071
						-0.230684	0.284738	2.16397	0.462114	0.157912		6.44544e-06	0.000600625	0.158212	0.0230052		-0.207895	0.283234	2.16487	0.461922	0.15059		8.72402e-06	0.000560464	0.15087	0.0333693		0	0.283234	2.17581	0.459599	0.118776		3.79462e-05	0.00045683	0.119004	0.178071		-0.283234	0	2.17581	0.459599	0.118776		3.79462e-05	0.00045683	0.119004	0.178071
						-0.231141	0.284348	2.16394	0.46212	0.158512		6.88256e-06	0.000599184	0.158812	0.0246245		-0.20822	0.282778	2.16483	0.461931	0.15115		8.70921e-06	0.000559516	0.15143	0.0333691		0	0.282778	2.17563	0.459637	0.119233		3.79462e-05	0.00045683	0.119461	0.178071		-0.282778	0	2.17563	0.459637	0.119233		3.79462e-05	0.00045683	0.119461	0.178071
						-0.231598	0.28396	2.16391	0.462127	0.159112		6.88176e-06	0.000597766	0.159411	0.0246801		-0.208543	0.282321	2.16479	0.46194	0.15171		8.69399e-06	0.000558546	0.151989	0.0333686		0	0.282321	2.17545	0.459675	0.119689		3.79462e-05	0.00045683	0.119918	0.178071		-0.282321	0	2.17545	0.459675	0.119689		3.79462e-05	0.00045683	0.119918	0.178071
						-0.232055	0.283574	2.16387	0.462134	0.159709		6.86534e-06	0.000596303	0.160008	0.0246816		-0.208865	0.281864	2.16474	0.461948	0.152268		8.67837e-06	0.000557553	0.152547	0.0333679		0	0.281864	2.17527	0.459713	0.120146		3.79462e-05	0.00045683	0.120375	0.178071		-0.281864	0	2.17527	0.459713	0.120146		3.79462e-05	0.00045683	0.120375	0.178071
						-0.232512	0.283191	2.16384	0.462141	0.160306		6.31802e-06	0.000594791	0.160603	0.0227716		-0.209184	0.281407	2.1647	0.461957	0.152826		9.06297e-06	0.000556537	0.153104	0.0349103		0	0.281407	2.17509	0.459751	0.120603		3.50312e-05	0.00045683	0.120831	0.164391		-0.281407	0	2.17509	0.459751	0.120603		3.50312e-05	0.00045683	0.120831	0.164391
						-0.232968	0.28281	2.16381	0.462147	0.160901		5.74851e-06	0.000593229	0.161197	0.0207735		-0.209502	0.28095	2.16466	0.461966	0.153382		9.0471e-06	0.000555536	0.15366	0.034912		0	0.28095	2.17492	0.459786	0.12106		3.50312e-05	0.00045683	0.121288	0.164391		-0.28095	0	2.17492	0.459786	0.12106		3.50312e-05	0.00045683	0.121288	0.164391
						-0.233425	0.282432	2.16379	0.462153	0.161494		5.73346e-06	0.000591614	0.16179	0.0207757		-0.209818	0.280493	2.16462	0.461975	0.153938		8.40928e-06	0.000554512	0.154215	0.0325106		0	0.280493	2.17476	0.459821	0.121517		3.50312e-05	0.00045683	0.121745	0.164391		-0.280493	0	2.17476	0.459821	0.121517		3.50312e-05	0.00045683	0.121745	0.164391
						-0.233882	0.282056	2.16376	0.462159	0.162085		5.71784e-06	0.000589945	0.16238	0.0207777		-0.210133	0.280037	2.16458	0.461983	0.154492		7.94619e-06	0.000553464	0.154769	0.0307785		0	0.280037	2.17459	0.459856	0.121974		3.50312e-05	0.00045683	0.122202	0.164391		-0.280037	0	2.17459	0.459856	0.121974		3.50312e-05	0.00045683	0.122202	0.164391
						-0.234339	0.281683	2.16373	0.462164	0.162675		5.78882e-06	0.000588219	0.162969	0.0210974		-0.210445	0.27958	2.16454	0.461991	0.155046		7.93162e-06	0.000552392	0.155322	0.0307817		0	0.27958	2.17443	0.459891	0.12243		3.50312e-05	0.00045683	0.122659	0.164391		-0.27958	0	2.17443	0.459891	0.12243		3.50312e-05	0.00045683	0.122659	0.164391
						-0.234796	0.281312	2.16371	0.46217	0.163264		6.02264e-06	0.000586439	0.163557	0.0220162		-0.210756	0.279123	2.16451	0.461999	0.155598		7.92649e-06	0.000551295	0.155874	0.030823		0	0.279123	2.17426	0.459926	0.122887		3.50312e-05	0.00045683	0.123116	0.164391		-0.279123	0	2.17426	0.459926	0.122887		3.50312e-05	0.00045683	0.123116	0.164391
						-0.235253	0.280944	2.16368	0.462176	0.16385		5.54971e-06	0.000584611	0.164142	0.0203508		-0.211064	0.278666	2.16447	0.462007	0.156149		8.24132e-06	0.000550172	0.156425	0.0321126		0	0.278666	2.1741	0.459961	0.123344		3.50312e-05	0.00045683	0.123572	0.164391		-0.278666	0	2.1741	0.459961	0.123344		3.50312e-05	0.00045683	0.123572	0.164391
						-0.235709	0.28058	2.16365	0.462182	0.164435		4.9401e-06	0.000582722	0.164726	0.0181741		-0.211371	0.278209	2.16443	0.462015	0.1567		8.22293e-06	0.000549006	0.156974	0.032109		0	0.278209	2.17393	0.459996	0.123801		3.50312e-05	0.00045683	0.124029	0.164391		-0.278209	0	2.17393	0.459996	0.123801		3.50312e-05	0.00045683	0.124029	0.164391
						-0.236166	0.280218	2.16363	0.462187	0.165017		5.36604e-06	0.000580771	0.165308	0.0198073		-0.211675	0.277752	2.16439	0.462024	0.157249		8.19233e-06	0.000547814	0.157523	0.0320591		0	0.277752	2.17376	0.460031	0.124258		3.50312e-05	0.00045683	0.124486	0.164391		-0.277752	0	2.17376	0.460031	0.124258		3.50312e-05	0.00045683	0.124486	0.164391
						-0.236623	0.279859	2.1636	0.462192	0.165598		5.36314e-06	0.000578824	0.165887	0.0198632		-0.211978	0.277296	2.16435	0.462032	0.157796		7.15344e-06	0.000546597	0.15807	0.028056		0	0.277296	2.1736	0.460067	0.124714		3.50312e-05	0.00045683	0.124943	0.164391		-0.277296	0	2.1736	0.460067	0.124714		3.50312e-05	0.00045683	0.124943	0.164391
						-0.23708	0.279504	2.16358	0.462197	0.166177		5.34482e-06	0.000576814	0.166465	0.0198644		-0.212278	0.276839	2.16432	0.462039	0.158343		7.13665e-06	0.000545354	0.158616	0.0280539		0	0.276839	2.17343	0.460102	0.125171		3.50312e-05	0.00045683	0.1254	0.164391		-0.276839	0	2.17343	0.460102	0.125171		3.50312e-05	0.00045683	0.1254	0.164391
						-0.237537	0.279152	2.16355	0.462203	0.166754		5.32577e-06	0.000574735	0.167041	0.0198652		-0.212576	0.276382	2.16429	0.462046	0.158888		7.52277e-06	0.000544085	0.15916	0.0296407		0	0.276382	2.17327	0.460137	0.125628		3.24391e-05	0.00045683	0.125857	0.152227		-0.276382	0	2.17327	0.460137	0.125628		3.24391e-05	0.00045683	0.125857	0.152227
						-0.237994	0.278803	2.16353	0.462208	0.167328		5.06316e-06	0.000572587	0.167615	0.0189565		-0.212871	0.275925	2.16425	0.462054	0.159432		7.5056e-06	0.000542828	0.159704	0.0296416		0	0.275925	2.17311	0.460169	0.126085		3.24391e-05	0.00045683	0.126313	0.152227		-0.275925	0	2.17311	0.460169	0.126085		3.24391e-05	0.00045683	0.126313	0.152227
						-0.23845	0.278458	2.1635	0.462213	0.167901		4.28463e-06	0.000570367	0.168186	0.0161041		-0.213164	0.275468	2.16422	0.462061	0.159975		7.48798e-06	0.000541545	0.160246	0.029642		0	0.275468	2.17296	0.460201	0.126542		3.24391e-05	0.00045683	0.12677	0.152227		-0.275468	0	2.17296	0.460201	0.126542		3.24391e-05	0.00045683	0.12677	0.152227
						-0.238907	0.278116	2.16348	0.462217	0.168471		4.268e-06	0.000568073	0.168755	0.0161064		-0.213455	0.275011	2.16418	0.462069	0.160517		7.46988e-06	0.000540235	0.160787	0.0296421		0	0.275011	2.17281	0.460234	0.126999		3.24391e-05	0.00045683	0.127227	0.152227		-0.275011	0	2.17281	0.460234	0.126999		3.24391e-05	0.00045683	0.127227	0.152227
						-0.239364	0.277779	2.16346	0.462222	0.169039		4.25068e-06	0.000565703	0.169322	0.0161082		-0.213743	0.274555	2.16415	0.462076	0.161057		7.14259e-06	0.000538899	0.161327	0.0284136		0	0.274555	2.17266	0.460266	0.127455		3.24391e-05	0.00045683	0.127684	0.152227		-0.274555	0	2.17266	0.460266	0.127455		3.24391e-05	0.00045683	0.127684	0.152227
						-0.239821	0.277445	2.16344	0.462226	0.169605		4.23266e-06	0.000563257	0.169887	0.0161096		-0.214029	0.274098	2.16411	0.462083	0.161596		6.45191e-06	0.000537536	0.161865	0.0257311		0	0.274098	2.1725	0.460299	0.127912		3.24391e-05	0.00045683	0.128141	0.152227		-0.274098	0	2.1725	0.460299	0.127912		3.24391e-05	0.00045683	0.128141	0.152227
						-0.240278	0.277115	2.16342	0.46223	0.170168		4.2139e-06	0.000560731	0.170449	0.0161104		-0.214313	0.273641	2.16408	0.46209	0.162134		6.43584e-06	0.000536146	0.162402	0.0257335		0	0.273641	2.17235	0.460331	0.128369		3.24391e-05	0.00045683	0.128598	0.152227		-0.273641	0	2.17235	0.460331	0.128369		3.24391e-05	0.00045683	0.128598	0.152227
						-0.240734	0.27679	2.1634	0.462234	0.170729		4.19437e-06	0.000558125	0.171008	0.0161106		-0.214593	0.273184	2.16405	0.462096	0.16267		6.41934e-06	0.000534729	0.162937	0.0257356		0	0.273184	2.1722	0.460364	0.128826		3.24391e-05	0.00045683	0.129054	0.152227		-0.273184	0	2.1722	0.460364	0.128826		3.24391e-05	0.00045683	0.129054	0.152227
						-0.241191	0.27647	2.16338	0.462239	0.171287		3.99102e-06	0.000555437	0.171565	0.0154038		-0.214871	0.272727	2.16402	0.462103	0.163204		6.4024e-06	0.000533285	0.163471	0.0257372		0	0.272727	2.17204	0.460396	0.129283		3.24391e-05	0.00045683	0.129511	0.152227		-0.272727	0	2.17204	0.460396	0.129283		3.24391e-05	0.00045683	0.129511	0.152227
						-0.241648	0.276154	2.16337	0.462243	0.171843		3.94065e-06	0.000552747	0.172119	0.0152834		-0.215146	0.27227	2.16399	0.462109	0.163738		6.38501e-06	0.000531814	0.164004	0.0257383		0	0.27227	2.17189	0.460429	0.12974		3.24391e-05	0.00045683	0.129968	0.152227		-0.27227	0	2.17189	0.460429	0.12974		3.24391e-05	0.00045683	0.129968	0.152227
						-0.242105	0.275842	2.16335	0.462247	0.172395		3.92085e-06	0.000549982	0.17267	0.015283		-0.215419	0.271814	2.16396	0.462115	0.164269		6.36717e-06	0.000530315	0.164535	0.0257389		0	0.271814	2.17174	0.460461	0.130196		3.24391e-05	0.00045683	0.130425	0.152227		-0.271814	0	2.17174	0.460461	0.130196		3.24391e-05	0.00045683	0.130425	0.152227
						-0.242562	0.275536	2.16333	0.46225	0.172945		3.90022e-06	0.000547135	0.173219	0.0152817		-0.215688	0.271357	2.16393	0.462122	0.1648		6.32184e-06	0.00052879	0.165064	0.0256293		0	0.271357	2.17158	0.460493	0.130653		3.01248e-05	0.00045683	0.130882	0.141367		-0.271357	0	2.17158	0.460493	0.130653		3.01248e-05	0.00045683	0.130882	0.141367
						-0.243019	0.275235	2.16331	0.462254	0.173493		3.87873e-06	0.000544206	0.173765	0.0152793		-0.215954	0.2709	2.1639	0.462128	0.165329		5.94643e-06	0.000527277	0.165592	0.0241766		0	0.2709	2.17144	0.460524	0.13111		3.01248e-05	0.00045683	0.131339	0.141367		-0.2709	0	2.17144	0.460524	0.13111		3.01248e-05	0.00045683	0.131339	0.141367
						-0.243475	0.274939	2.16329	0.462258	0.174037		3.85635e-06	0.000541194	0.174307	0.0152757		-0.216218	0.270443	2.16387	0.462134	0.165856		6.06163e-06	0.000525731	0.166119	0.0247174		0	0.270443	2.1713	0.460554	0.131567		3.01248e-05	0.00045683	0.131795	0.141367		-0.270443	0	2.1713	0.460554	0.131567		3.01248e-05	0.00045683	0.131795	0.141367
						-0.243932	0.274649	2.16328	0.462262	0.174578		3.61913e-06	0.0005381	0.174847	0.0144184		-0.216478	0.269986	2.16385	0.46214	0.166382		6.04293e-06	0.000524154	0.166644	0.0247153		0	0.269986	2.17116	0.460584	0.132024		3.01248e-05	0.00045683	0.132252	0.141367		-0.269986	0	2.17116	0.460584	0.132024		3.01248e-05	0.00045683	0.132252	0.141367
						-0.244389	0.274365	2.16326	0.462266	0.175116		2.91057e-06	0.000534927	0.175384	0.0116644		-0.216735	0.269529	2.16382	0.462146	0.166906		6.02375e-06	0.000522553	0.167167	0.0247124		0	0.269529	2.17102	0.460614	0.132481		3.01248e-05	0.00045683	0.132709	0.141367		-0.269529	0	2.17102	0.460614	0.132481		3.01248e-05	0.00045683	0.132709	0.141367
						-0.244846	0.274087	2.16324	0.462269	0.175651		2.89298e-06	0.000531675	0.175917	0.0116648		-0.216988	0.269073	2.16379	0.462152	0.167428		6.00409e-06	0.000520927	0.167689	0.0247086		0	0.269073	2.17087	0.460644	0.132937		3.01248e-05	0.00045683	0.133166	0.141367		-0.269073	0	2.17087	0.460644	0.132937		3.01248e-05	0.00045683	0.133166	0.141367
						-0.245303	0.273815	2.16323	0.462271	0.176183		2.87468e-06	0.000528348	0.176447	0.011664		-0.217239	0.268616	2.16376	0.462158	0.167949		5.98392e-06	0.000519277	0.168209	0.0247039		0	0.268616	2.17073	0.460674	0.133394		3.01248e-05	0.00045683	0.133623	0.141367		-0.268616	0	2.17073	0.460674	0.133394		3.01248e-05	0.00045683	0.133623	0.141367
						-0.24576	0.273549	2.16322	0.462274	0.176711		2.85562e-06	0.00052495	0.176974	0.0116617		-0.217486	0.268159	2.16373	0.462164	0.168468		5.60915e-06	0.000517603	0.168727	0.0232315		0	0.268159	2.17059	0.460704	0.133851		3.01248e-05	0.00045683	0.134079	0.141367		-0.268159	0	2.17059	0.460704	0.133851		3.01248e-05	0.00045683	0.134079	0.141367
						-0.246216	0.27329	2.1632	0.462277	0.177236		3.26409e-06	0.000521485	0.177497	0.0134183		-0.217729	0.267702	2.16371	0.46217	0.168986		5.05524e-06	0.000515907	0.169244	0.0210062		0	0.267702	2.17045	0.460734	0.134308		3.01248e-05	0.00045683	0.134536	0.141367		-0.267702	0	2.17045	0.460734	0.134308		3.01248e-05	0.00045683	0.134536	0.141367
						-0.246673	0.273039	2.16319	0.46228	0.177757		3.25803e-06	0.000518014	0.178016	0.0134831		-0.217969	0.267245	2.16368	0.462175	0.169502		5.03825e-06	0.00051419	0.169759	0.0210055		0	0.267245	2.17031	0.460765	0.134765		3.01248e-05	0.00045683	0.134993	0.141367		-0.267245	0	2.17031	0.460765	0.134765		3.01248e-05	0.00045683	0.134993	0.141367
						-0.24713	0.272795	2.16317	0.462284	0.178275		3.05015e-06	0.000514489	0.178533	0.0127093		-0.218205	0.266788	2.16366	0.46218	0.170016		5.02083e-06	0.000512451	0.170272	0.0210039		0	0.266788	2.17016	0.460795	0.135222		3.01248e-05	0.00045683	0.13545	0.141367		-0.266788	0	2.17016	0.460795	0.135222		3.01248e-05	0.00045683	0.13545	0.141367
						-0.247587	0.272558	2.16316	0.462287	0.17879		2.38614e-06	0.000510918	0.179045	0.010012		-0.218437	0.266332	2.16364	0.462185	0.170529		5.40593e-06	0.000510693	0.170784	0.0226928		0	0.266332	2.17002	0.460825	0.135678		2.80504e-05	0.00045683	0.135907	0.131632		-0.266332	0	2.17002	0.460825	0.135678		2.80504e-05	0.00045683	0.135907	0.131632
						-0.248044	0.272329	2.16315	0.462289	0.179301		2.37321e-06	0.000507309	0.179555	0.0100286		-0.218665	0.265875	2.16361	0.46219	0.171039		5.38804e-06	0.000508954	0.171294	0.022695		0	0.265875	2.16989	0.460853	0.136135		2.80504e-05	0.00045683	0.136364	0.131632		-0.265875	0	2.16989	0.460853	0.136135		2.80504e-05	0.00045683	0.136364	0.131632
						-0.248501	0.272109	2.16314	0.462292	0.179808		2.35979e-06	0.000503675	0.18006	0.0100439		-0.21889	0.265418	2.16359	0.462196	0.171548		5.3697e-06	0.000507198	0.171802	0.0226961		0	0.265418	2.16976	0.460881	0.136592		2.80504e-05	0.00045683	0.13682	0.131632		-0.265418	0	2.16976	0.460881	0.136592		2.80504e-05	0.00045683	0.13682	0.131632
						-0.248957	0.271897	2.16313	0.462294	0.180312		2.34586e-06	0.000500028	0.180562	0.0100574		-0.21911	0.264961	2.16356	0.462201	0.172055		5.29125e-06	0.000505426	0.172308	0.0224429		0	0.264961	2.16963	0.460909	0.137049		2.80504e-05	0.00045683	0.137277	0.131632		-0.264961	0	2.16963	0.460909	0.137049		2.80504e-05	0.00045683	0.137277	0.131632
						-0.249414	0.271693	2.16312	0.462296	0.180812		2.33142e-06	0.000496383	0.18106	0.0100689		-0.219326	0.264504	2.16354	0.462206	0.172561		4.49979e-06	0.00050364	0.172813	0.0191536		0	0.264504	2.16949	0.460937	0.137506		2.80504e-05	0.00045683	0.137734	0.131632		-0.264504	0	2.16949	0.460937	0.137506		2.80504e-05	0.00045683	0.137734	0.131632
						-0.249871	0.271499	2.1631	0.462299	0.181308		2.35566e-06	0.000492758	0.181555	0.0102484		-0.219538	0.264048	2.16351	0.462211	0.173065		4.48546e-06	0.000501841	0.173315	0.019161		0	0.264048	2.16936	0.460965	0.137963		2.80504e-05	0.00045683	0.138191	0.131632		-0.264048	0	2.16936	0.460965	0.137963		2.80504e-05	0.00045683	0.138191	0.131632
						-0.250328	0.271314	2.16309	0.462301	0.181801		2.46268e-06	0.000489174	0.182046	0.0107925		-0.219746	0.263591	2.16349	0.462215	0.173566		4.4708e-06	0.000500032	0.173816	0.0191675		0	0.263591	2.16923	0.460993	0.138419		2.80504e-05	0.00045683	0.138648	0.131632		-0.263591	0	2.16923	0.460993	0.138419		2.80504e-05	0.00045683	0.138648	0.131632
						-0.250785	0.271139	2.16308	0.462303	0.18229		1.99656e-06	0.00048566	0.182533	0.00881307		-0.219949	0.263134	2.16347	0.46222	0.174066		4.4558e-06	0.000498214	0.174316	0.0191728		0	0.263134	2.1691	0.461021	0.138876		2.80504e-05	0.00045683	0.139105	0.131632		-0.263134	0	2.1691	0.461021	0.138876		2.80504e-05	0.00045683	0.139105	0.131632
						-0.251242	0.270975	2.16307	0.462305	0.182776		2.10052e-06	0.000482225	0.183017	0.00933805		-0.220148	0.262677	2.16345	0.462224	0.174565		4.44045e-06	0.00049639	0.174813	0.019177		0	0.262677	2.16897	0.461049	0.139333		2.80504e-05	0.00045683	0.139561	0.131632		-0.262677	0	2.16897	0.461049	0.139333		2.80504e-05	0.00045683	0.139561	0.131632
						-0.251698	0.27082	2.16306	0.462308	0.183258		2.10069e-06	0.000478925	0.183498	0.00940312		-0.220342	0.26222	2.16343	0.462229	0.175061		4.42475e-06	0.000494563	0.175308	0.0191798		0	0.26222	2.16883	0.461077	0.13979		2.80504e-05	0.00045683	0.140018	0.131632		-0.26222	0	2.16883	0.461077	0.13979		2.80504e-05	0.00045683	0.140018	0.131632
						-0.252155	0.270676	2.16305	0.46231	0.183737		2.08639e-06	0.000475752	0.183975	0.00940142		-0.220532	0.261763	2.16341	0.462233	0.175556		4.4087e-06	0.000492733	0.175802	0.0191812		0	0.261763	2.1687	0.461105	0.140247		2.80504e-05	0.00045683	0.140475	0.131632		-0.261763	0	2.1687	0.461105	0.140247		2.80504e-05	0.00045683	0.140475	0.131632
						-0.252612	0.270544	2.16304	0.462312	0.184213		2.07168e-06	0.000472729	0.184449	0.00939481		-0.220716	0.261307	2.16339	0.462237	0.176048		4.49093e-06	0.000490906	0.176294	0.0196117		0	0.261307	2.16857	0.461133	0.140704		2.61843e-05	0.00045683	0.140932	0.122875		-0.261307	0	2.16857	0.461133	0.140704		2.61843e-05	0.00045683	0.140932	0.122875
						-0.253069	0.270422	2.16303	0.462314	0.184686		2.05657e-06	0.000469885	0.18492	0.00938272		-0.220896	0.26085	2.16337	0.462242	0.176539		4.00722e-06	0.000489116	0.176784	0.0175634		0	0.26085	2.16845	0.46116	0.14116		2.61843e-05	0.00045683	0.141389	0.122875		-0.26085	0	2.16845	0.46116	0.14116		2.61843e-05	0.00045683	0.141389	0.122875
						-0.253526	0.270312	2.16302	0.462316	0.185155		2.04107e-06	0.000467249	0.185389	0.00936455		-0.221071	0.260393	2.16335	0.462246	0.177028		4.13296e-06	0.000487333	0.177272	0.0181808		0	0.260393	2.16832	0.461186	0.141617		2.61843e-05	0.00045683	0.141846	0.122875		-0.260393	0	2.16832	0.461186	0.141617		2.61843e-05	0.00045683	0.141846	0.122875
						-0.253983	0.270214	2.16301	0.462318	0.185623		2.0252e-06	0.000464848	0.185855	0.00933974		-0.221241	0.259936	2.16333	0.46225	0.177516		4.15186e-06	0.000485557	0.177758	0.0183307		0	0.259936	2.1682	0.461212	0.142074		2.61843e-05	0.00045683	0.142302	0.122875		-0.259936	0	2.1682	0.461212	0.142074		2.61843e-05	0.00045683	0.142302	0.122875
						-0.254439	0.270128	2.163	0.46232	0.186087		2.00899e-06	0.000462713	0.186319	0.00930774		-0.221405	0.259479	2.16331	0.462254	0.178001		4.1354e-06	0.000483795	0.178243	0.0183246		0	0.259479	2.16808	0.461238	0.142531		2.61843e-05	0.00045683	0.142759	0.122875		-0.259479	0	2.16808	0.461238	0.142531		2.61843e-05	0.00045683	0.142759	0.122875
						-0.254896	0.270054	2.163	0.462322	0.18655		1.47427e-06	0.00046087	0.186781	0.00685766		-0.221564	0.259022	2.16329	0.462258	0.178485		4.11861e-06	0.000482049	0.178726	0.0183163		0	0.259022	2.16795	0.461264	0.142988		2.61843e-05	0.00045683	0.143216	0.122875		-0.259022	0	2.16795	0.461264	0.142988		2.61843e-05	0.00045683	0.143216	0.122875
						-0.255353	0.269993	2.16299	0.462323	0.187011		1.37422e-06	0.000459345	0.187241	0.00641348		-0.221718	0.258566	2.16327	0.462263	0.178967		4.10149e-06	0.000480325	0.179207	0.0183056		0	0.258566	2.16783	0.46129	0.143444		2.61843e-05	0.00045683	0.143673	0.122875		-0.258566	0	2.16783	0.46129	0.143444		2.61843e-05	0.00045683	0.143673	0.122875
						-0.25581	0.269945	2.16298	0.462325	0.18747		1.37272e-06	0.000458163	0.1877	0.00642304		-0.221867	0.258109	2.16325	0.462267	0.179447		4.08404e-06	0.000478626	0.179687	0.0182924		0	0.258109	2.16771	0.461317	0.143901		2.61843e-05	0.00045683	0.14413	0.122875		-0.258109	0	2.16771	0.461317	0.143901		2.61843e-05	0.00045683	0.14413	0.122875
						-0.256267	0.269911	2.16298	0.462326	0.187929		1.78785e-06	0.000457344	0.188157	0.00838041		-0.222009	0.257652	2.16323	0.462271	0.179926		3.91236e-06	0.000476956	0.180165	0.0175848		0	0.257652	2.16759	0.461343	0.144358		2.61843e-05	0.00045683	0.144587	0.122875		-0.257652	0	2.16759	0.461343	0.144358		2.61843e-05	0.00045683	0.144587	0.122875
						-0.256724	0.269889	2.16297	0.462328	0.188386		1.80018e-06	0.000456906	0.188614	0.00844631		-0.222147	0.257195	2.16322	0.462275	0.180403		3.33728e-06	0.000475319	0.180641	0.0150517		0	0.257195	2.16746	0.461369	0.144815		2.61843e-05	0.00045683	0.145043	0.122875		-0.257195	0	2.16746	0.461369	0.144815		2.61843e-05	0.00045683	0.145043	0.122875
						-0.25718	0.26988	2.16296	0.46233	0.188843		1.79865e-06	0.000456857	0.189071	0.00844003		-0.222278	0.256738	2.1632	0.462278	0.180878		3.32598e-06	0.00047372	0.181115	0.0150514		0	0.256738	2.16734	0.461395	0.145272		2.61843e-05	0.00045683	0.1455	0.122875		-0.256738	0	2.16734	0.461395	0.145272		2.61843e-05	0.00045683	0.1455	0.122875
						-0.257637	0.269885	2.16295	0.462332	0.1893		1.79711e-06	0.000457205	0.189528	0.0084264		-0.222403	0.256281	2.16319	0.462281	0.181352		3.7189e-06	0.000472163	0.181588	0.016885		0	0.256281	2.16722	0.461421	0.145729		2.44997e-05	0.00045683	0.145957	0.11497		-0.256281	0	2.16722	0.461421	0.145729		2.44997e-05	0.00045683	0.145957	0.11497
						-0.258094	0.269904	2.16294	0.462333	0.189757		1.79557e-06	0.000457952	0.189986	0.00840542		-0.222523	0.255825	2.16317	0.462285	0.181824		3.70741e-06	0.000470679	0.18206	0.0168859		0	0.255825	2.1671	0.461446	0.146185		2.44997e-05	0.00045683	0.146414	0.11497		-0.255825	0	2.1671	0.461446	0.146185		2.44997e-05	0.00045683	0.146414	0.11497
						-0.258551	0.269936	2.16293	0.462335	0.190215		1.79402e-06	0.000459098	0.190444	0.00837722		-0.222636	0.255368	2.16315	0.462289	0.182295		3.69574e-06	0.000469244	0.18253	0.0168842		0	0.255368	2.16699	0.46147	0.146642		2.44997e-05	0.00045683	0.146871	0.11497		-0.255368	0	2.16699	0.46147	0.146642		2.44997e-05	0.00045683	0.146871	0.11497
						-0.259008	0.269982	2.16292	0.462337	0.190674		1.79248e-06	0.000460635	0.190904	0.00834208		-0.222743	0.254911	2.16313	0.462292	0.182764		3.68387e-06	0.000467864	0.182998	0.0168796		0	0.254911	2.16687	0.461495	0.147099		2.44997e-05	0.00045683	0.147328	0.11497		-0.254911	0	2.16687	0.461495	0.147099		2.44997e-05	0.00045683	0.147328	0.11497
						-0.259465	0.270041	2.16292	0.462339	0.191135		1.79094e-06	0.000462552	0.191366	0.00830039		-0.222844	0.254454	2.16312	0.462296	0.183232		3.67183e-06	0.000466544	0.183465	0.016872		0	0.254454	2.16676	0.461519	0.147556		2.44997e-05	0.00045683	0.147784	0.11497		-0.254454	0	2.16676	0.461519	0.147556		2.44997e-05	0.00045683	0.147784	0.11497
						-0.259921	0.270113	2.16291	0.46234	0.191597		1.5179e-06	0.000464833	0.19183	0.00700043		-0.222939	0.253997	2.1631	0.4623	0.183699		3.6596e-06	0.000465287	0.183931	0.0168613		0	0.253997	2.16664	0.461544	0.148013		2.44997e-05	0.00045683	0.148241	0.11497		-0.253997	0	2.16664	0.461544	0.148013		2.44997e-05	0.00045683	0.148241	0.11497
						-0.260378	0.270199	2.1629	0.462342	0.192062		1.36433e-06	0.000467455	0.192296	0.00625685		-0.223027	0.25354	2.16308	0.462303	0.184164		3.43832e-06	0.000464099	0.184396	0.0158823		0	0.25354	2.16653	0.461568	0.14847		2.44997e-05	0.00045683	0.148698	0.11497		-0.25354	0	2.16653	0.461568	0.14847		2.44997e-05	0.00045683	0.148698	0.11497
						-0.260835	0.270298	2.16289	0.462343	0.192529		1.37829e-06	0.000470395	0.192765	0.00628139		-0.223109	0.253084	2.16307	0.462307	0.184628		3.00343e-06	0.000462985	0.184859	0.0139068		0	0.253084	2.16641	0.461593	0.148926		2.44997e-05	0.00045683	0.149155	0.11497		-0.253084	0	2.16641	0.461593	0.148926		2.44997e-05	0.00045683	0.149155	0.11497
						-0.261292	0.27041	2.16289	0.462345	0.193		1.80279e-06	0.000473625	0.193237	0.00815997		-0.223184	0.252627	2.16305	0.46231	0.185091		2.9986e-06	0.000461948	0.185322	0.0139156		0	0.252627	2.1663	0.461617	0.149383		2.44997e-05	0.00045683	0.149612	0.11497		-0.252627	0	2.1663	0.461617	0.149383		2.44997e-05	0.00045683	0.149612	0.11497
						-0.261749	0.270535	2.16288	0.462347	0.193473		1.8299e-06	0.000477098	0.193712	0.00822239		-0.223253	0.25217	2.16304	0.462313	0.185553		2.99372e-06	0.000460995	0.185783	0.0139217		0	0.25217	2.16618	0.461642	0.14984		2.44997e-05	0.00045683	0.150069	0.11497		-0.25217	0	2.16618	0.461642	0.14984		2.44997e-05	0.00045683	0.150069	0.11497
						-0.262205	0.270673	2.16287	0.462348	0.193951		1.84309e-06	0.000480798	0.194191	0.00821792		-0.223315	0.251713	2.16302	0.462316	0.186014		2.98877e-06	0.000460129	0.186244	0.0139249		0	0.251713	2.16607	0.461666	0.150297		2.44997e-05	0.00045683	0.150525	0.11497		-0.251713	0	2.16607	0.461666	0.150297		2.44997e-05	0.00045683	0.150525	0.11497
						-0.262662	0.270823	2.16286	0.46235	0.194431		1.85599e-06	0.000484692	0.194674	0.00820894		-0.22337	0.251256	2.16301	0.462319	0.186474		3.38552e-06	0.000459355	0.186704	0.0157999		0	0.251256	2.16595	0.461691	0.150754		2.2974e-05	0.00045683	0.150982	0.10781		-0.251256	0	2.16595	0.461691	0.150754		2.2974e-05	0.00045683	0.150982	0.10781
						-0.263119	0.270985	2.16285	0.462352	0.194916		1.86858e-06	0.000488749	0.19516	0.00819601		-0.223418	0.250799	2.16299	0.462322	0.186933		3.38055e-06	0.000458688	0.187163	0.0157997		0	0.250799	2.16584	0.461714	0.151211		2.2974e-05	0.00045683	0.151439	0.10781		-0.250799	0	2.16584	0.461714	0.151211		2.2974e-05	0.00045683	0.151439	0.10781
						-0.263576	0.271159	2.16285	0.462354	0.195405		1.88083e-06	0.000492937	0.195651	0.00817968		-0.223459	0.250343	2.16298	0.462326	0.187392		3.37554e-06	0.000458117	0.187621	0.0157959		0	0.250343	2.16574	0.461737	0.151667		2.2974e-05	0.00045683	0.151896	0.10781		-0.250343	0	2.16574	0.461737	0.151667		2.2974e-05	0.00045683	0.151896	0.10781
						-0.264033	0.271344	2.16284	0.462356	0.195898		2.05962e-06	0.000497224	0.196146	0.00887997		-0.223493	0.249886	2.16296	0.462329	0.18785		3.37048e-06	0.000457647	0.188079	0.0157884		0	0.249886	2.16563	0.46176	0.152124		2.2974e-05	0.00045683	0.152353	0.10781		-0.249886	0	2.16563	0.46176	0.152124		2.2974e-05	0.00045683	0.152353	0.10781
						-0.26449	0.27154	2.16283	0.462358	0.196395		2.09275e-06	0.000501563	0.196646	0.00894476		-0.223521	0.249429	2.16295	0.462332	0.188308		3.36539e-06	0.00045728	0.188536	0.0157772		0	0.249429	2.16552	0.461783	0.152581		2.2974e-05	0.00045683	0.15281	0.10781		-0.249429	0	2.16552	0.461783	0.152581		2.2974e-05	0.00045683	0.15281	0.10781
						-0.264946	0.271747	2.16282	0.46236	0.196897		2.11333e-06	0.000505942	0.197149	0.00895455		-0.223541	0.248972	2.16293	0.462336	0.188765		3.16864e-06	0.00045702	0.188994	0.0148633		0	0.248972	2.16541	0.461806	0.153038		2.2974e-05	0.00045683	0.153266	0.10781		-0.248972	0	2.16541	0.461806	0.153038		2.2974e-05	0.00045683	0.153266	0.10781
						-0.265403	0.271965	2.16281	0.462362	0.197402		2.13321e-06	0.000510338	0.197658	0.00896095		-0.223554	0.248515	2.16292	0.462339	0.189222		2.81563e-06	0.00045687	0.189451	0.0132117		0	0.248515	2.1653	0.461829	0.153495		2.2974e-05	0.00045683	0.153723	0.10781		-0.248515	0	2.1653	0.461829	0.153495		2.2974e-05	0.00045683	0.153723	0.10781
						-0.26586	0.272192	2.1628	0.462364	0.197913		2.1524e-06	0.00051473	0.19817	0.0089644		-0.22356	0.248058	2.1629	0.462342	0.189679		2.8188e-06	0.000456831	0.189907	0.0132278		0	0.248058	2.1652	0.461852	0.153952		2.2974e-05	0.00045683	0.15418	0.10781		-0.248058	0	2.1652	0.461852	0.153952		2.2974e-05	0.00045683	0.15418	0.10781
						-0.266317	0.272429	2.16279	0.462366	0.198428		2.57183e-06	0.000519095	0.198687	0.0106212		-0.223559	0.247602	2.16289	0.462345	0.190136		2.82199e-06	0.000456906	0.190364	0.0132405		0	0.247602	2.16509	0.461875	0.154408		2.2974e-05	0.00045683	0.154637	0.10781		-0.247602	0	2.16509	0.461875	0.154408		2.2974e-05	0.00045683	0.154637	0.10781
						-0.266774	0.272676	2.16278	0.462369	0.198947		2.60288e-06	0.000523403	0.199208	0.0106609		-0.223551	0.247145	2.16288	0.462347	0.190593		2.82519e-06	0.000457096	0.190821	0.0132501		0	0.247145	2.16498	0.461898	0.154865		2.2974e-05	0.00045683	0.155094	0.10781		-0.247145	0	2.16498	0.461898	0.154865		2.2974e-05	0.00045683	0.155094	0.10781
						-0.267231	0.272931	2.16276	0.462372	0.19947		2.61989e-06	0.000527649	0.199734	0.0106443		-0.223535	0.246688	2.16286	0.46235	0.19105		2.8284e-06	0.000457402	0.191278	0.0132563		0	0.246688	2.16487	0.461921	0.155322		2.2974e-05	0.00045683	0.15555	0.10781		-0.246688	0	2.16487	0.461921	0.155322		2.2974e-05	0.00045683	0.15555	0.10781
						-0.267687	0.273195	2.16275	0.462374	0.199998		2.63622e-06	0.000531823	0.200264	0.0106266		-0.223512	0.246231	2.16285	0.462353	0.191507		3.23066e-06	0.000457826	0.191736	0.0151275		0	0.246231	2.16477	0.461944	0.155779		2.15878e-05	0.00045683	0.156007	0.101305		-0.246231	0	2.16477	0.461944	0.155779		2.15878e-05	0.00045683	0.156007	0.101305
						-0.268144	0.273468	2.16274	0.462377	0.200529		2.65187e-06	0.000535913	0.200797	0.0106081		-0.223482	0.245774	2.16283	0.462356	0.191965		3.23383e-06	0.000458357	0.192194	0.0151249		0	0.245774	2.16467	0.461965	0.156236		2.15878e-05	0.00045683	0.156464	0.101305		-0.245774	0	2.16467	0.461965	0.156236		2.15878e-05	0.00045683	0.156464	0.101305
						-0.268601	0.273748	2.16273	0.462379	0.201065		2.61125e-06	0.000539908	0.201335	0.0103683		-0.223445	0.245317	2.16282	0.462359	0.192423		3.23701e-06	0.000459	0.192653	0.0151185		0	0.245317	2.16456	0.461987	0.156693		2.15878e-05	0.00045683	0.156921	0.101305		-0.245317	0	2.16456	0.461987	0.156693		2.15878e-05	0.00045683	0.156921	0.101305
						-0.269058	0.274036	2.16271	0.462382	0.201605		2.49197e-06	0.000543802	0.201877	0.00982382		-0.2234	0.244861	2.1628	0.462363	0.192882		3.24019e-06	0.000459756	0.193112	0.0151085		0	0.244861	2.16446	0.462008	0.157149		2.15878e-05	0.00045683	0.157378	0.101305		-0.244861	0	2.16446	0.462008	0.157149		2.15878e-05	0.00045683	0.157378	0.101305
						-0.269515	0.274331	2.1627	0.462385	0.202149		2.51378e-06	0.000547588	0.202423	0.00984125		-0.223348	0.244404	2.16279	0.462366	0.193342		3.24337e-06	0.000460623	0.193572	0.0150948		0	0.244404	2.16436	0.46203	0.157606		2.15878e-05	0.00045683	0.157835	0.101305		-0.244404	0	2.16436	0.46203	0.157606		2.15878e-05	0.00045683	0.157835	0.101305
						-0.269972	0.274632	2.16269	0.462387	0.202697		2.53461e-06	0.000551263	0.202972	0.00985667		-0.223289	0.243947	2.16277	0.462369	0.193803		3.24655e-06	0.0004616	0.194034	0.0150776		0	0.243947	2.16426	0.462052	0.158063		2.15878e-05	0.00045683	0.158291	0.101305		-0.243947	0	2.16426	0.462052	0.158063		2.15878e-05	0.00045683	0.158291	0.101305
						-0.270428	0.274941	2.16268	0.46239	0.203248		2.55451e-06	0.000554823	0.203525	0.0098703		-0.223223	0.24349	2.16276	0.462372	0.194264		3.00125e-06	0.000462685	0.194496	0.0139058		0	0.24349	2.16416	0.462073	0.15852		2.15878e-05	0.00045683	0.158748	0.101305		-0.24349	0	2.16416	0.462073	0.15852		2.15878e-05	0.00045683	0.158748	0.101305
						-0.270885	0.275256	2.16267	0.462392	0.203803		2.5735e-06	0.000558267	0.204082	0.00988233		-0.22315	0.243033	2.16274	0.462375	0.194727		2.82173e-06	0.000463876	0.194959	0.0130404		0	0.243033	2.16406	0.462095	0.158977		2.15878e-05	0.00045683	0.159205	0.101305		-0.243033	0	2.16406	0.462095	0.158977		2.15878e-05	0.00045683	0.159205	0.101305
						-0.271342	0.275577	2.16265	0.462395	0.204361		2.98564e-06	0.000561593	0.204642	0.0113971		-0.223069	0.242577	2.16273	0.462378	0.195191		2.83307e-06	0.000465169	0.195423	0.0130564		0	0.242577	2.16396	0.462116	0.159434		2.15878e-05	0.00045683	0.159662	0.101305		-0.242577	0	2.16396	0.462116	0.159434		2.15878e-05	0.00045683	0.159662	0.101305
						-0.271799	0.275903	2.16264	0.462398	0.204923		3.01597e-06	0.000564792	0.205205	0.0114476		-0.222981	0.24212	2.16272	0.462381	0.195656		2.84436e-06	0.000466563	0.195889	0.0130693		0	0.24212	2.16386	0.462138	0.15989		2.15878e-05	0.00045683	0.160119	0.101305		-0.24212	0	2.16386	0.462138	0.15989		2.15878e-05	0.00045683	0.160119	0.101305
						-0.272256	0.276235	2.16263	0.462401	0.205487		3.19943e-06	0.000567872	0.205771	0.0120781		-0.222887	0.241663	2.1627	0.462384	0.196123		2.85561e-06	0.000468054	0.196357	0.0130792		0	0.241663	2.16376	0.462159	0.160347		2.15878e-05	0.00045683	0.160576	0.101305		-0.241663	0	2.16376	0.462159	0.160347		2.15878e-05	0.00045683	0.160576	0.101305
						-0.272713	0.276573	2.16261	0.462404	0.206055		3.34745e-06	0.000570817	0.206341	0.0125717		-0.222785	0.241206	2.16269	0.462387	0.196591		3.26308e-06	0.000469638	0.196826	0.014895		0	0.241206	2.16365	0.462181	0.160804		2.03244e-05	0.00045683	0.161032	0.0953764		-0.241206	0	2.16365	0.462181	0.160804		2.03244e-05	0.00045683	0.161032	0.0953764
						-0.273169	0.276915	2.1626	0.462407	0.206626		3.3663e-06	0.000573638	0.206913	0.0125803		-0.222676	0.240749	2.16268	0.46239	0.19706		3.27397e-06	0.000471277	0.197296	0.0148928		0	0.240749	2.16356	0.462201	0.161261		2.03244e-05	0.00045683	0.161489	0.0953764		-0.240749	0	2.16356	0.462201	0.161261		2.03244e-05	0.00045683	0.161489	0.0953764
						-0.273626	0.277262	2.16258	0.462411	0.2072		3.38427e-06	0.000576349	0.207488	0.012588		-0.22256	0.240292	2.16266	0.462393	0.197532		3.28478e-06	0.000472997	0.197768	0.0148876		0	0.240292	2.16346	0.462222	0.161718		2.03244e-05	0.00045683	0.161946	0.0953764		-0.240292	0	2.16346	0.462222	0.161718		2.03244e-05	0.00045683	0.161946	0.0953764
						-0.274083	0.277613	2.16256	0.462414	0.207776		3.4014e-06	0.000578954	0.208066	0.0125948		-0.222437	0.239836	2.16265	0.462397	0.198005		3.29551e-06	0.000474794	0.198242	0.0148797		0	0.239836	2.16337	0.462242	0.162175		2.03244e-05	0.00045683	0.162403	0.0953764		-0.239836	0	2.16337	0.462242	0.162175		2.03244e-05	0.00045683	0.162403	0.0953764
						-0.27454	0.277969	2.16255	0.462417	0.208355		3.41773e-06	0.000581455	0.208646	0.0126008		-0.222308	0.239379	2.16263	0.4624	0.198479		3.30615e-06	0.000476663	0.198718	0.0148692		0	0.239379	2.16327	0.462262	0.162631		2.03244e-05	0.00045683	0.16286	0.0953764		-0.239379	0	2.16327	0.462262	0.162631		2.03244e-05	0.00045683	0.16286	0.0953764
						-0.274997	0.278329	2.16253	0.462421	0.208937		3.4333e-06	0.000583857	0.209228	0.0126062		-0.222172	0.238922	2.16261	0.462403	0.198956		3.31669e-06	0.000478601	0.199195	0.0148562		0	0.238922	2.16318	0.462283	0.163088		2.03244e-05	0.00045683	0.163317	0.0953764		-0.238922	0	2.16318	0.462283	0.163088		2.03244e-05	0.00045683	0.163317	0.0953764
						-0.275454	0.278692	2.16252	0.462424	0.20952		3.44815e-06	0.000586161	0.209813	0.0126109		-0.222029	0.238465	2.1626	0.462407	0.199435		3.32712e-06	0.000480603	0.199675	0.0148409		0	0.238465	2.16308	0.462303	0.163545		2.03244e-05	0.00045683	0.163773	0.0953764		-0.238465	0	2.16308	0.462303	0.163545		2.03244e-05	0.00045683	0.163773	0.0953764
						-0.27591	0.27906	2.1625	0.462428	0.210107		3.46231e-06	0.000588372	0.210401	0.0126151		-0.22188	0.238008	2.16258	0.46241	0.199915		3.33745e-06	0.000482663	0.200157	0.0148234		0	0.238008	2.16299	0.462323	0.164002		2.03244e-05	0.00045683	0.16423	0.0953764		-0.238008	0	2.16299	0.462323	0.164002		2.03244e-05	0.00045683	0.16423	0.0953764
						-0.276367	0.27943	2.16248	0.462431	0.210695		3.85647e-06	0.000590493	0.21099	0.0140008		-0.221724	0.237551	2.16257	0.462413	0.200398		3.34766e-06	0.000484778	0.20064	0.0148039		0	0.237551	2.16289	0.462344	0.164459		2.03244e-05	0.00045683	0.164687	0.0953764		-0.237551	0	2.16289	0.462344	0.164459		2.03244e-05	0.00045683	0.164687	0.0953764
						-0.276824	0.279805	2.16247	0.462435	0.211285		3.88197e-06	0.00059252	0.211582	0.0140452		-0.221562	0.237095	2.16255	0.462417	0.200883		3.35775e-06	0.000486943	0.201126	0.0147825		0	0.237095	2.1628	0.462364	0.164915		2.03244e-05	0.00045683	0.165144	0.0953764		-0.237095	0	2.1628	0.462364	0.164915		2.03244e-05	0.00045683	0.165144	0.0953764
						-0.277281	0.280182	2.16245	0.462439	0.211878		3.89421e-06	0.000594461	0.212175	0.0140434		-0.221393	0.236638	2.16254	0.46242	0.20137		3.24029e-06	0.000489153	0.201614	0.0142009		0	0.236638	2.1627	0.462384	0.165372		2.03244e-05	0.00045683	0.165601	0.0953764		-0.236638	0	2.1627	0.462384	0.165372		2.03244e-05	0.00045683	0.165601	0.0953764
						-0.277738	0.280562	2.16243	0.462443	0.212472		3.90587e-06	0.000596319	0.212771	0.0140416		-0.221219	0.236181	2.16252	0.462423	0.201859		3.52142e-06	0.000491404	0.202105	0.0153623		0	0.236181	2.16261	0.462405	0.165829		1.91695e-05	0.00045683	0.166058	0.089957		-0.236181	0	2.16261	0.462405	0.165829		1.91695e-05	0.00045683	0.166058	0.089957
						-0.278195	0.280946	2.16241	0.462447	0.213069		3.91699e-06	0.000598099	0.213368	0.0140397		-0.221037	0.235724	2.16251	0.462427	0.20235		3.64475e-06	0.000493639	0.202597	0.0158284		0	0.235724	2.16252	0.462424	0.166286		1.91695e-05	0.00045683	0.166514	0.089957		-0.235724	0	2.16252	0.462424	0.166286		1.91695e-05	0.00045683	0.166514	0.089957
						-0.278651	0.281332	2.16239	0.462451	0.213667		4.19157e-06	0.000599804	0.213967	0.0149811		-0.22085	0.235267	2.16249	0.46243	0.202844		3.66611e-06	0.000495908	0.203092	0.0158483		0	0.235267	2.16243	0.462443	0.166743		1.91695e-05	0.00045683	0.166971	0.089957		-0.235267	0	2.16243	0.462443	0.166743		1.91695e-05	0.00045683	0.166971	0.089957
						-0.279108	0.28172	2.16237	0.462455	0.214267		4.26721e-06	0.000601418	0.214567	0.0152106		-0.220657	0.23481	2.16247	0.462434	0.20334		3.68716e-06	0.000498203	0.203589	0.0158659		0	0.23481	2.16234	0.462462	0.1672		1.91695e-05	0.00045683	0.167428	0.089957		-0.23481	0	2.16234	0.462462	0.1672		1.91695e-05	0.00045683	0.167428	0.089957
						-0.279565	0.282111	2.16235	0.462459	0.214868		4.27875e-06	0.000602962	0.21517	0.0152126		-0.220459	0.234354	2.16245	0.462438	0.203838		3.70789e-06	0.000500519	0.204088	0.0158812		0	0.234354	2.16225	0.462481	0.167656		1.91695e-05	0.00045683	0.167885	0.089957		-0.234354	0	2.16225	0.462481	0.167656		1.91695e-05	0.00045683	0.167885	0.089957
						-0.280022	0.282505	2.16233	0.462463	0.215471		4.28979e-06	0.000604444	0.215773	0.0152145		-0.220254	0.233897	2.16244	0.462441	0.204338		3.7283e-06	0.000502852	0.20459	0.0158946		0	0.233897	2.16216	0.4625	0.168113		1.91695e-05	0.00045683	0.168342	0.089957		-0.233897	0	2.16216	0.4625	0.168113		1.91695e-05	0.00045683	0.168342	0.089957
						-0.280479	0.282901	2.16231	0.462468	0.216075		4.30035e-06	0.000605867	0.216378	0.0152161		-0.220044	0.23344	2.16242	0.462445	0.204841		3.74839e-06	0.0005052	0.205094	0.0159059		0	0.23344	2.16207	0.46252	0.16857		1.91695e-05	0.00045683	0.168799	0.089957		-0.23344	0	2.16207	0.46252	0.16857		1.91695e-05	0.00045683	0.168799	0.089957
						-0.280936	0.283299	2.16229	0.462472	0.216681		4.31045e-06	0.000607233	0.216985	0.0152176		-0.219828	0.232983	2.1624	0.462449	0.205347		3.76815e-06	0.000507558	0.2056	0.0159155		0	0.232983	2.16198	0.462539	0.169027		1.91695e-05	0.00045683	0.169255	0.089957		-0.232983	0	2.16198	0.462539	0.169027		1.91695e-05	0.00045683	0.169255	0.089957
						-0.281392	0.283699	2.16227	0.462476	0.217289		4.68497e-06	0.000608545	0.217593	0.0165041		-0.219607	0.232526	2.16238	0.462453	0.205854		3.78757e-06	0.000509923	0.206109	0.0159233		0	0.232526	2.16189	0.462558	0.169484		1.91695e-05	0.00045683	0.169712	0.089957		-0.232526	0	2.16189	0.462558	0.169484		1.91695e-05	0.00045683	0.169712	0.089957
						-0.281849	0.284101	2.16225	0.462481	0.217897		4.70633e-06	0.000609798	0.218202	0.0165453		-0.219381	0.232069	2.16237	0.462456	0.206364		3.80667e-06	0.000512292	0.20662	0.0159296		0	0.232069	2.1618	0.462577	0.169941		1.91695e-05	0.00045683	0.170169	0.089957		-0.232069	0	2.1618	0.462577	0.169941		1.91695e-05	0.00045683	0.170169	0.089957
						-0.282306	0.284505	2.16223	0.462486	0.218507		4.71514e-06	0.000611	0.218812	0.0165437		-0.219149	0.231613	2.16235	0.46246	0.206876		3.82543e-06	0.000514661	0.207134	0.0159344		0	0.231613	2.16171	0.462596	0.170397		1.91695e-05	0.00045683	0.170626	0.089957		-0.231613	0	2.16171	0.462596	0.170397		1.91695e-05	0.00045683	0.170626	0.089957
						-0.282763	0.284911	2.16221	0.46249	0.219118		4.72358e-06	0.000612152	0.219424	0.0165421		-0.218912	0.231156	2.16233	0.462464	0.207391		4.22212e-06	0.000517028	0.207649	0.0175063		0	0.231156	2.16162	0.462615	0.170854		1.81108e-05	0.00045683	0.171083	0.0849887		-0.231156	0	2.16162	0.462615	0.170854		1.81108e-05	0.00045683	0.171083	0.0849887
						-0.28322	0.285318	2.16218	0.462495	0.21973		4.73165e-06	0.000613257	0.220037	0.0165405		-0.21867	0.230699	2.16231	0.462468	0.207908		4.23966e-06	0.000519319	0.208168	0.0175015		0	0.230699	2.16154	0.462634	0.171311		1.81108e-05	0.00045683	0.17154	0.0849887		-0.230699	0	2.16154	0.462634	0.171311		1.81108e-05	0.00045683	0.17154	0.0849887
						-0.283676	0.285727	2.16216	0.4625	0.220343		4.73938e-06	0.000614317	0.22065	0.0165389		-0.218423	0.230242	2.16229	0.462472	0.208427		4.25687e-06	0.000521601	0.208688	0.0174957		0	0.230242	2.16145	0.462652	0.171768		1.81108e-05	0.00045683	0.171996	0.0849887		-0.230242	0	2.16145	0.462652	0.171768		1.81108e-05	0.00045683	0.171996	0.0849887
						-0.284133	0.286138	2.16214	0.462505	0.220958		4.84168e-06	0.000615334	0.221265	0.016868		-0.218171	0.229785	2.16227	0.462477	0.208949		4.27375e-06	0.00052387	0.209211	0.0174889		0	0.229785	2.16137	0.46267	0.172225		1.81108e-05	0.00045683	0.172453	0.0849887		-0.229785	0	2.16137	0.46267	0.172225		1.81108e-05	0.00045683	0.172453	0.0849887
						-0.28459	0.28655	2.16212	0.462509	0.221573		5.0867e-06	0.000616305	0.221881	0.0176937		-0.217914	0.229328	2.16225	0.462481	0.209473		4.29029e-06	0.000526125	0.209736	0.0174814		0	0.229328	2.16128	0.462688	0.172682		1.81108e-05	0.00045683	0.17291	0.0849887		-0.229328	0	2.16128	0.462688	0.172682		1.81108e-05	0.00045683	0.17291	0.0849887
						-0.285047	0.286964	2.16209	0.462515	0.222189		5.09449e-06	0.000617228	0.222498	0.0176943		-0.217653	0.228872	2.16223	0.462485	0.209999		4.3065e-06	0.000528364	0.210263	0.0174731		0	0.228872	2.1612	0.462706	0.173138		1.81108e-05	0.00045683	0.173367	0.0849887		-0.228872	0	2.1612	0.462706	0.173138		1.81108e-05	0.00045683	0.173367	0.0849887
						-0.285504	0.287379	2.16207	0.46252	0.222806		5.10199e-06	0.000618118	0.223116	0.0176948		-0.217388	0.228415	2.16221	0.46249	0.210527		4.32238e-06	0.000530585	0.210793	0.0174641		0	0.228415	2.16111	0.462724	0.173595		1.81108e-05	0.00045683	0.173824	0.0849887		-0.228415	0	2.16111	0.462724	0.173595		1.81108e-05	0.00045683	0.173824	0.0849887
						-0.285961	0.287795	2.16205	0.462525	0.223425		5.1092e-06	0.000618975	0.223734	0.0176953		-0.217118	0.227958	2.16219	0.462494	0.211058		4.33794e-06	0.000532786	0.211324	0.0174545		0	0.227958	2.16103	0.462742	0.174052		1.81108e-05	0.00045683	0.17428	0.0849887		-0.227958	0	2.16103	0.462742	0.174052		1.81108e-05	0.00045683	0.17428	0.0849887
						-0.286417	0.288213	2.16202	0.46253	0.224044		5.46294e-06	0.000619802	0.224353	0.0188952		-0.216844	0.227501	2.16217	0.462498	0.211591		4.35317e-06	0.000534967	0.211858	0.0174444		0	0.227501	2.16095	0.46276	0.174509		1.81108e-05	0.00045683	0.174737	0.0849887		-0.227501	0	2.16095	0.46276	0.174509		1.81108e-05	0.00045683	0.174737	0.0849887
						-0.286874	0.288632	2.162	0.462535	0.224663		5.48111e-06	0.000620594	0.224974	0.0189338		-0.216566	0.227044	2.16215	0.462503	0.212126		4.36808e-06	0.000537126	0.212394	0.0174338		0	0.227044	2.16086	0.462778	0.174966		1.81108e-05	0.00045683	0.175194	0.0849887		-0.227044	0	2.16086	0.462778	0.174966		1.81108e-05	0.00045683	0.175194	0.0849887
						-0.287331	0.289052	2.16197	0.462541	0.225284		5.48749e-06	0.000621355	0.225595	0.0189326		-0.216283	0.226587	2.16213	0.462507	0.212663		4.45553e-06	0.000539261	0.212932	0.0177124		0	0.226587	2.16078	0.462797	0.175423		1.81108e-05	0.00045683	0.175651	0.0849887		-0.226587	0	2.16078	0.462797	0.175423		1.81108e-05	0.00045683	0.175651	0.0849887
						-0.287788	0.289473	2.16195	0.462546	0.225905		5.49361e-06	0.000622087	0.226216	0.0189315		-0.215997	0.226131	2.16211	0.462511	0.213202		4.92315e-06	0.00054138	0.213473	0.0194948		0	0.226131	2.16069	0.462815	0.175879		1.71374e-05	0.00045683	0.176108	0.080421		-0.226131	0	2.16069	0.462815	0.175879		1.71374e-05	0.00045683	0.176108	0.080421
						-0.288245	0.289895	2.16192	0.462552	0.226527		5.49949e-06	0.000622791	0.226839	0.0189303		-0.215706	0.225674	2.16209	0.462516	0.213743		4.8558e-06	0.000543413	0.214015	0.0191561		0	0.225674	2.16061	0.462832	0.176336		1.71374e-05	0.00045683	0.176565	0.080421		-0.225674	0	2.16061	0.462832	0.176336		1.71374e-05	0.00045683	0.176565	0.080421
						-0.288702	0.290319	2.16189	0.462557	0.22715		5.50514e-06	0.000623469	0.227462	0.0189292		-0.215412	0.225217	2.16206	0.462521	0.214287		4.87622e-06	0.00054542	0.214559	0.0191659		0	0.225217	2.16053	0.462849	0.176793		1.71374e-05	0.00045683	0.177021	0.080421		-0.225217	0	2.16053	0.462849	0.176793		1.71374e-05	0.00045683	0.177021	0.080421
						-0.289158	0.290743	2.16187	0.462563	0.227774		5.51057e-06	0.000624121	0.228086	0.018928		-0.215114	0.22476	2.16204	0.462526	0.214832		4.8962e-06	0.000547401	0.215106	0.0191748		0	0.22476	2.16045	0.462866	0.17725		1.71374e-05	0.00045683	0.177478	0.080421		-0.22476	0	2.16045	0.462866	0.17725		1.71374e-05	0.00045683	0.177478	0.080421
						-0.289615	0.291168	2.16184	0.462568	0.228398		5.62012e-06	0.000624749	0.22871	0.0192849		-0.214812	0.224303	2.16202	0.462531	0.21538		4.91575e-06	0.000549354	0.215654	0.0191829		0	0.224303	2.16037	0.462883	0.177707		1.71374e-05	0.00045683	0.177935	0.080421		-0.224303	0	2.16037	0.462883	0.177707		1.71374e-05	0.00045683	0.177935	0.080421
						-0.290072	0.291594	2.16182	0.462574	0.229023		5.84606e-06	0.00062535	0.229335	0.0200409		-0.214507	0.223847	2.16199	0.462536	0.215929		4.93486e-06	0.00055128	0.216205	0.0191902		0	0.223847	2.16029	0.4629	0.178164		1.71374e-05	0.00045683	0.178392	0.080421		-0.223847	0	2.16029	0.4629	0.178164		1.71374e-05	0.00045683	0.178392	0.080421
						-0.290529	0.292021	2.16179	0.46258	0.229648		5.85146e-06	0.000625923	0.229961	0.0200411		-0.214198	0.22339	2.16197	0.462541	0.21648		4.95356e-06	0.000553177	0.216757	0.0191969		0	0.22339	2.16021	0.462918	0.17862		1.71374e-05	0.00045683	0.178849	0.080421		-0.22339	0	2.16021	0.462918	0.17862		1.71374e-05	0.00045683	0.178849	0.080421
						-0.290986	0.292449	2.16176	0.462586	0.230274		5.85668e-06	0.000626478	0.230587	0.0200412		-0.213887	0.222933	2.16195	0.462546	0.217033		4.97184e-06	0.000555046	0.217311	0.0192028		0	0.222933	2.16013	0.462935	0.179077		1.71374e-05	0.00045683	0.179306	0.080421		-0.222933	0	2.16013	0.462935	0.179077		1.71374e-05	0.00045683	0.179306	0.080421
						-0.291443	0.292878	2.16173	0.462591	0.2309		6.18847e-06	0.000627016	0.231214	0.0211584		-0.213571	0.222476	2.16192	0.462551	0.217588		4.98971e-06	0.000556887	0.217867	0.0192082		0	0.222476	2.16005	0.462952	0.179534		1.71374e-05	0.00045683	0.179762	0.080421		-0.222476	0	2.16005	0.462952	0.179534		1.71374e-05	0.00045683	0.179762	0.080421
						-0.291899	0.293307	2.16171	0.462598	0.231527		6.20419e-06	0.000627533	0.231841	0.0211946		-0.213253	0.222019	2.1619	0.462556	0.218145		5.00719e-06	0.000558699	0.218425	0.0192129		0	0.222019	2.15997	0.462969	0.179991		1.71374e-05	0.00045683	0.180219	0.080421		-0.222019	0	2.15997	0.462969	0.179991		1.71374e-05	0.00045683	0.180219	0.080421
						-0.292356	0.293738	2.16168	0.462604	0.232155		6.20887e-06	0.000628032	0.232469	0.0211938		-0.212931	0.221562	2.16188	0.462561	0.218704		5.02428e-06	0.000560482	0.218984	0.0192172		0	0.221562	2.15989	0.462986	0.180448		1.71374e-05	0.00045683	0.180676	0.080421		-0.221562	0	2.15989	0.462986	0.180448		1.71374e-05	0.00045683	0.180676	0.080421
						-0.292813	0.294169	2.16165	0.46261	0.232783		6.21338e-06	0.000628514	0.233097	0.0211929		-0.212606	0.221106	2.16185	0.462566	0.219265		5.39724e-06	0.000562236	0.219546	0.0205793		0	0.221106	2.15981	0.463003	0.180905		1.62401e-05	0.00045683	0.181133	0.0762098		-0.221106	0	2.15981	0.463003	0.180905		1.62401e-05	0.00045683	0.181133	0.0762098
						-0.29327	0.2946	2.16162	0.462616	0.233411		6.21774e-06	0.000628979	0.233726	0.0211921		-0.212279	0.220649	2.16183	0.462571	0.219827		5.41276e-06	0.000563875	0.220109	0.0205785		0	0.220649	2.15974	0.463019	0.181361		1.62401e-05	0.00045683	0.18159	0.0762098		-0.220649	0	2.15974	0.463019	0.181361		1.62401e-05	0.00045683	0.18159	0.0762098
						-0.293727	0.295033	2.16159	0.462622	0.23404		6.22194e-06	0.000629427	0.234355	0.0211913		-0.211948	0.220192	2.1618	0.462577	0.220391		5.42791e-06	0.000565484	0.220673	0.0205774		0	0.220192	2.15966	0.463036	0.181818		1.62401e-05	0.00045683	0.182047	0.0762098		-0.220192	0	2.15966	0.463036	0.181818		1.62401e-05	0.00045683	0.182047	0.0762098
						-0.294184	0.295466	2.16156	0.462629	0.23467		6.22599e-06	0.000629861	0.234985	0.0211905		-0.211615	0.219735	2.16178	0.462582	0.220956		5.4427e-06	0.000567063	0.22124	0.020576		0	0.219735	2.15959	0.463052	0.182275		1.62401e-05	0.00045683	0.182503	0.0762098		-0.219735	0	2.15959	0.463052	0.182275		1.62401e-05	0.00045683	0.182503	0.0762098
						-0.29464	0.295899	2.16153	0.462635	0.2353		6.2299e-06	0.000630279	0.235615	0.0211897		-0.211279	0.219278	2.16175	0.462587	0.221523		5.54878e-06	0.000568614	0.221807	0.0209198		0	0.219278	2.15951	0.463068	0.182732		1.62401e-05	0.00045683	0.18296	0.0762098		-0.219278	0	2.15951	0.463068	0.182732		1.62401e-05	0.00045683	0.18296	0.0762098
						-0.295097	0.296333	2.1615	0.462641	0.23593		6.43782e-06	0.000630684	0.236245	0.0218829		-0.21094	0.218821	2.16173	0.462593	0.222092		5.74331e-06	0.000570151	0.222377	0.0215948		0	0.218821	2.15943	0.463084	0.183189		1.62401e-05	0.00045683	0.183417	0.0762098		-0.218821	0	2.15943	0.463084	0.183189		1.62401e-05	0.00045683	0.183417	0.0762098
						-0.295554	0.296768	2.16147	0.462648	0.236561		6.54821e-06	0.000631069	0.236876	0.0222445		-0.210599	0.218365	2.1617	0.462599	0.222662		5.75954e-06	0.000571688	0.222948	0.0215976		0	0.218365	2.15936	0.463101	0.183646		1.62401e-05	0.00045683	0.183874	0.0762098		-0.218365	0	2.15936	0.463101	0.183646		1.62401e-05	0.00045683	0.183874	0.0762098
						-0.296011	0.297204	2.16144	0.462654	0.237192		6.55205e-06	0.000631439	0.237507	0.0222445		-0.210255	0.217908	2.16167	0.462605	0.223234		5.77541e-06	0.000573199	0.22352	0.0216001		0	0.217908	2.15928	0.463117	0.184102		1.62401e-05	0.00045683	0.184331	0.0762098		-0.217908	0	2.15928	0.463117	0.184102		1.62401e-05	0.00045683	0.184331	0.0762098
						-0.296468	0.29764	2.16141	0.462661	0.237823		6.86069e-06	0.000631801	0.238139	0.023279		-0.209909	0.217451	2.16165	0.46261	0.223807		5.79093e-06	0.000574683	0.224094	0.0216022		0	0.217451	2.15921	0.463133	0.184559		1.62401e-05	0.00045683	0.184788	0.0762098		-0.217451	0	2.15921	0.463133	0.184559		1.62401e-05	0.00045683	0.184788	0.0762098
						-0.296925	0.298076	2.16138	0.462668	0.238455		6.87445e-06	0.000632151	0.238771	0.0233128		-0.209561	0.216994	2.16162	0.462616	0.224382		5.80611e-06	0.00057614	0.22467	0.021604		0	0.216994	2.15913	0.463149	0.185016		1.62401e-05	0.00045683	0.185244	0.0762098		-0.216994	0	2.15913	0.463149	0.185016		1.62401e-05	0.00045683	0.185244	0.0762098
						-0.297381	0.298513	2.16135	0.462674	0.239087		6.87795e-06	0.00063249	0.239403	0.0233122		-0.20921	0.216537	2.16159	0.462622	0.224958		5.82096e-06	0.000577572	0.225246	0.0216056		0	0.216537	2.15905	0.463166	0.185473		1.62401e-05	0.00045683	0.185701	0.0762098		-0.216537	0	2.15905	0.463166	0.185473		1.62401e-05	0.00045683	0.185701	0.0762098
						-0.297838	0.29895	2.16131	0.462681	0.23972		6.88134e-06	0.000632818	0.240036	0.0233116		-0.208856	0.21608	2.16157	0.462628	0.225535		6.17111e-06	0.000578978	0.225825	0.0228496		0	0.21608	2.15898	0.463182	0.18593		1.54104e-05	0.00045683	0.186158	0.0723165		-0.21608	0	2.15898	0.463182	0.18593		1.54104e-05	0.00045683	0.186158	0.0723165
						-0.298295	0.299388	2.16128	0.462688	0.240352		6.88462e-06	0.000633135	0.240669	0.023311		-0.2085	0.215624	2.16154	0.462634	0.226114		6.18439e-06	0.000580269	0.226404	0.0228478		0	0.215624	2.15891	0.463197	0.186386		1.54104e-05	0.00045683	0.186615	0.0723165		-0.215624	0	2.15891	0.463197	0.186386		1.54104e-05	0.00045683	0.186615	0.0723165
						-0.298752	0.299827	2.16125	0.462695	0.240986		6.8878e-06	0.000633443	0.241302	0.0233104		-0.208143	0.215167	2.16151	0.46264	0.226694		6.19736e-06	0.000581535	0.226985	0.0228459		0	0.215167	2.15884	0.463213	0.186843		1.54104e-05	0.00045683	0.187072	0.0723165		-0.215167	0	2.15884	0.463213	0.186843		1.54104e-05	0.00045683	0.187072	0.0723165
						-0.299209	0.300265	2.16122	0.462702	0.241619		6.89087e-06	0.000633741	0.241936	0.0233099		-0.207783	0.21471	2.16148	0.462646	0.227276		6.21004e-06	0.000582776	0.227567	0.0228439		0	0.21471	2.15876	0.463228	0.1873		1.54104e-05	0.00045683	0.187529	0.0723165		-0.21471	0	2.15876	0.463228	0.1873		1.54104e-05	0.00045683	0.187529	0.0723165
						-0.299666	0.300705	2.16119	0.462709	0.242253		6.89385e-06	0.00063403	0.24257	0.0233093		-0.207421	0.214253	2.16145	0.462652	0.227859		6.22243e-06	0.000583992	0.228151	0.0228418		0	0.214253	2.15869	0.463243	0.187757		1.54104e-05	0.00045683	0.187985	0.0723165		-0.214253	0	2.15869	0.463243	0.187757		1.54104e-05	0.00045683	0.187985	0.0723165
						-0.300122	0.301144	2.16115	0.462716	0.242887		6.9477e-06	0.00063431	0.243204	0.023481		-0.207057	0.213796	2.16142	0.462659	0.228443		6.23453e-06	0.000585185	0.228735	0.0228396		0	0.213796	2.15862	0.463259	0.188214		1.54104e-05	0.00045683	0.188442	0.0723165		-0.213796	0	2.15862	0.463259	0.188214		1.54104e-05	0.00045683	0.188442	0.0723165
						-0.300579	0.301584	2.16112	0.462723	0.243521		7.19141e-06	0.00063458	0.243838	0.0242944		-0.206691	0.213339	2.16139	0.462665	0.229028		6.24636e-06	0.000586354	0.229321	0.0228373		0	0.213339	2.15855	0.463274	0.188671		1.54104e-05	0.00045683	0.188899	0.0723165		-0.213339	0	2.15855	0.463274	0.188671		1.54104e-05	0.00045683	0.188899	0.0723165
						-0.301036	0.302025	2.16109	0.46273	0.244156		7.19427e-06	0.000634834	0.244473	0.0242943		-0.206324	0.212883	2.16136	0.462671	0.229614		6.31486e-06	0.000587501	0.229908	0.0230427		0	0.212883	2.15848	0.46329	0.189127		1.54104e-05	0.00045683	0.189356	0.0723165		-0.212883	0	2.15848	0.46329	0.189127		1.54104e-05	0.00045683	0.189356	0.0723165
						-0.301493	0.302466	2.16105	0.462737	0.24479		7.47862e-06	0.000635082	0.245108	0.0252446		-0.205954	0.212426	2.16133	0.462678	0.230202		6.54844e-06	0.000588635	0.230496	0.0238489		0	0.212426	2.1584	0.463305	0.189584		1.54104e-05	0.00045683	0.189813	0.0723165		-0.212426	0	2.1584	0.463305	0.189584		1.54104e-05	0.00045683	0.189813	0.0723165
						-0.30195	0.302907	2.16102	0.462745	0.245426		7.49074e-06	0.000635327	0.245743	0.0252758		-0.205583	0.211969	2.1613	0.462684	0.23079		6.5614e-06	0.000589791	0.231085	0.0238493		0	0.211969	2.15833	0.463321	0.190041		1.54104e-05	0.00045683	0.19027	0.0723165		-0.211969	0	2.15833	0.463321	0.190041		1.54104e-05	0.00045683	0.19027	0.0723165
						-0.302406	0.303348	2.16098	0.462752	0.246061		7.49341e-06	0.000635565	0.246379	0.0252753		-0.20521	0.211512	2.16127	0.462691	0.23138		6.57409e-06	0.000590925	0.231676	0.0238496		0	0.211512	2.15826	0.463336	0.190498		1.54104e-05	0.00045683	0.190726	0.0723165		-0.211512	0	2.15826	0.463336	0.190498		1.54104e-05	0.00045683	0.190726	0.0723165
						-0.302863	0.30379	2.16095	0.46276	0.246696		7.49601e-06	0.000635796	0.247014	0.0252749		-0.204835	0.211055	2.16124	0.462697	0.231971		6.8996e-06	0.00059204	0.232267	0.0249833		0	0.211055	2.15819	0.463351	0.190955		1.46412e-05	0.00045683	0.191183	0.068707		-0.211055	0	2.15819	0.463351	0.190955		1.46412e-05	0.00045683	0.191183	0.068707
						-0.30332	0.304232	2.16091	0.462767	0.247332		7.49853e-06	0.000636021	0.24765	0.0252745		-0.204459	0.210598	2.16121	0.462704	0.232563		6.91076e-06	0.000593044	0.23286	0.0249814		0	0.210598	2.15812	0.463366	0.191412		1.46412e-05	0.00045683	0.19164	0.068707		-0.210598	0	2.15812	0.463366	0.191412		1.46412e-05	0.00045683	0.19164	0.068707
						-0.303777	0.304675	2.16088	0.462775	0.247968		7.50097e-06	0.000636239	0.248286	0.0252741		-0.204081	0.210142	2.16118	0.462711	0.233156		6.92168e-06	0.000594028	0.233453	0.0249794		0	0.210142	2.15805	0.463381	0.191868		1.46412e-05	0.00045683	0.192097	0.068707		-0.210142	0	2.15805	0.463381	0.191868		1.46412e-05	0.00045683	0.192097	0.068707
						-0.304234	0.305118	2.16084	0.462782	0.248604		7.50335e-06	0.00063645	0.248923	0.0252737		-0.203701	0.209685	2.16114	0.462718	0.23375		6.93237e-06	0.000594993	0.234048	0.0249774		0	0.209685	2.15798	0.463395	0.192325		1.46412e-05	0.00045683	0.192554	0.068707		-0.209685	0	2.15798	0.463395	0.192325		1.46412e-05	0.00045683	0.192554	0.068707
						-0.304691	0.305561	2.16081	0.46279	0.249241		7.50566e-06	0.000636656	0.249559	0.0252733		-0.20332	0.209228	2.16111	0.462725	0.234345		6.94282e-06	0.000595939	0.234643	0.0249753		0	0.209228	2.15792	0.46341	0.192782		1.46412e-05	0.00045683	0.193011	0.068707		-0.209228	0	2.15792	0.46341	0.192782		1.46412e-05	0.00045683	0.193011	0.068707
						-0.305147	0.306004	2.16077	0.462797	0.249878		7.5079e-06	0.000636856	0.250196	0.0252729		-0.202937	0.208771	2.16108	0.462732	0.234941		6.95304e-06	0.000596867	0.23524	0.0249732		0	0.208771	2.15785	0.463425	0.193239		1.46412e-05	0.00045683	0.193467	0.068707		-0.208771	0	2.15785	0.463425	0.193239		1.46412e-05	0.00045683	0.193467	0.068707
						-0.305604	0.306448	2.16074	0.462805	0.250514		7.7286e-06	0.000637051	0.250833	0.0260078		-0.202553	0.208314	2.16105	0.462739	0.235538		6.96305e-06	0.000597777	0.235837	0.0249711		0	0.208314	2.15778	0.463439	0.193696		1.46412e-05	0.00045683	0.193924	0.068707		-0.208314	0	2.15778	0.463439	0.193696		1.46412e-05	0.00045683	0.193924	0.068707
						-0.306061	0.306892	2.1607	0.462812	0.251151		7.78212e-06	0.000637229	0.25147	0.0261806		-0.202167	0.207857	2.16101	0.462746	0.236136		6.97284e-06	0.000598669	0.236435	0.0249689		0	0.207857	2.15771	0.463454	0.194153		1.46412e-05	0.00045683	0.194381	0.068707		-0.207857	0	2.15771	0.463454	0.194153		1.46412e-05	0.00045683	0.194381	0.068707
						-0.306518	0.307336	2.16067	0.46282	0.251789		8.04117e-06	0.000637402	0.252107	0.0270448		-0.20178	0.207401	2.16098	0.462753	0.236735		6.98242e-06	0.000599544	0.237034	0.0249668		0	0.207401	2.15764	0.463468	0.194609		1.46412e-05	0.00045683	0.194838	0.068707		-0.207401	0	2.15764	0.463468	0.194609		1.46412e-05	0.00045683	0.194838	0.068707
						-0.306975	0.307781	2.16063	0.462828	0.252426		8.05185e-06	0.000637579	0.252745	0.0270732		-0.201392	0.206944	2.16095	0.46276	0.237334		6.99357e-06	0.000600403	0.237634	0.0249709		0	0.206944	2.15758	0.463483	0.195066		1.46412e-05	0.00045683	0.195295	0.068707		-0.206944	0	2.15758	0.463483	0.195066		1.46412e-05	0.00045683	0.195295	0.068707
						-0.307432	0.308226	2.16059	0.462836	0.253064		8.05393e-06	0.000637751	0.253383	0.0270729		-0.201002	0.206487	2.16092	0.462767	0.237934		7.27559e-06	0.000601245	0.238235	0.0259414		0	0.206487	2.15751	0.463498	0.195523		1.46412e-05	0.00045683	0.195751	0.068707		-0.206487	0	2.15751	0.463498	0.195523		1.46412e-05	0.00045683	0.195751	0.068707
						-0.307888	0.308671	2.16055	0.462844	0.253701		8.05595e-06	0.000637919	0.25402	0.0270725		-0.200612	0.20603	2.16088	0.462774	0.238536		7.57506e-06	0.000602131	0.238837	0.0269695		0	0.20603	2.15744	0.463512	0.19598		1.39262e-05	0.00045683	0.196208	0.0653516		-0.20603	0	2.15744	0.463512	0.19598		1.39262e-05	0.00045683	0.196208	0.0653516
						-0.308345	0.309116	2.16052	0.462852	0.254339		8.05792e-06	0.000638082	0.254658	0.0270722		-0.200219	0.205573	2.16085	0.462782	0.239138		7.58439e-06	0.000602912	0.239439	0.0269677		0	0.205573	2.15737	0.463526	0.196437		1.39262e-05	0.00045683	0.196665	0.0653516		-0.205573	0	2.15737	0.463526	0.196437		1.39262e-05	0.00045683	0.196665	0.0653516
						-0.308802	0.309561	2.16048	0.46286	0.254977		8.05984e-06	0.000638241	0.255297	0.0270719		-0.199826	0.205116	2.16081	0.462789	0.239741		7.59353e-06	0.000603679	0.240043	0.0269659		0	0.205116	2.15731	0.46354	0.196894		1.39262e-05	0.00045683	0.197122	0.0653516		-0.205116	0	2.15731	0.46354	0.196894		1.39262e-05	0.00045683	0.197122	0.0653516
						-0.309259	0.310007	2.16044	0.462868	0.255616		8.06171e-06	0.000638396	0.255935	0.0270716		-0.199431	0.20466	2.16078	0.462797	0.240344		7.60248e-06	0.000604431	0.240647	0.0269641		0	0.20466	2.15725	0.463554	0.19735		1.39262e-05	0.00045683	0.197579	0.0653516		-0.20466	0	2.15725	0.463554	0.19735		1.39262e-05	0.00045683	0.197579	0.0653516
						-0.309716	0.310453	2.1604	0.462876	0.256254		8.06353e-06	0.000638547	0.256573	0.0270713		-0.199035	0.204203	2.16074	0.462804	0.240949		7.61125e-06	0.000605169	0.241251	0.0269623		0	0.204203	2.15718	0.463568	0.197807		1.39262e-05	0.00045683	0.198036	0.0653516		-0.204203	0	2.15718	0.463568	0.197807		1.39262e-05	0.00045683	0.198036	0.0653516
						-0.310173	0.310899	2.16037	0.462885	0.256893		8.0653e-06	0.000638694	0.257212	0.0270711		-0.198639	0.203746	2.1607	0.462812	0.241554		7.61985e-06	0.000605894	0.241857	0.0269605		0	0.203746	2.15712	0.463582	0.198264		1.39262e-05	0.00045683	0.198492	0.0653516		-0.203746	0	2.15712	0.463582	0.198264		1.39262e-05	0.00045683	0.198492	0.0653516
						-0.310629	0.311346	2.16033	0.462893	0.257531		8.19595e-06	0.000638837	0.257851	0.0275034		-0.198241	0.203289	2.16067	0.46282	0.24216		7.59688e-06	0.000606605	0.242463	0.0268477		0	0.203289	2.15705	0.463596	0.198721		1.39262e-05	0.00045683	0.198949	0.0653516		-0.203289	0	2.15705	0.463596	0.198721		1.39262e-05	0.00045683	0.198949	0.0653516
						-0.311086	0.311792	2.16029	0.462901	0.25817		8.31436e-06	0.000638967	0.25849	0.0278951		-0.197841	0.202832	2.16063	0.462827	0.242767		7.58456e-06	0.000607303	0.24307	0.0267733		0	0.202832	2.15699	0.46361	0.199178		1.39262e-05	0.00045683	0.199406	0.0653516		-0.202832	0	2.15699	0.46361	0.199178		1.39262e-05	0.00045683	0.199406	0.0653516
						-0.311543	0.312239	2.16025	0.462909	0.258809		8.54728e-06	0.000639087	0.259129	0.0286712		-0.197441	0.202376	2.1606	0.462835	0.243374		7.5936e-06	0.000607988	0.243678	0.0267751		0	0.202376	2.15692	0.463624	0.199635		1.39262e-05	0.00045683	0.199863	0.0653516		-0.202376	0	2.15692	0.463624	0.199635		1.39262e-05	0.00045683	0.199863	0.0653516
						-0.312	0.312686	2.16021	0.462918	0.259448		8.55665e-06	0.000639218	0.259768	0.0286967		-0.19704	0.201919	2.16056	0.462842	0.243982		7.60247e-06	0.000608661	0.244286	0.0267767		0	0.201919	2.15686	0.463638	0.200091		1.39262e-05	0.00045683	0.20032	0.0653516		-0.201919	0	2.15686	0.463638	0.200091		1.39262e-05	0.00045683	0.20032	0.0653516
						-0.312457	0.313133	2.16017	0.462926	0.260087		8.5583e-06	0.000639346	0.260407	0.0286965		-0.196638	0.201462	2.16053	0.46285	0.244591		7.61117e-06	0.000609322	0.244895	0.0267782		0	0.201462	2.15679	0.463652	0.200548		1.39262e-05	0.00045683	0.200777	0.0653516		-0.201462	0	2.15679	0.463652	0.200548		1.39262e-05	0.00045683	0.200777	0.0653516
						-0.312914	0.31358	2.16013	0.462935	0.260727		8.5599e-06	0.000639471	0.261047	0.0286963		-0.196235	0.201005	2.16049	0.462858	0.2452		7.99326e-06	0.000609971	0.245505	0.0280926		0	0.201005	2.15673	0.463666	0.201005		1.32597e-05	0.00045683	0.201233	0.0622237		-0.201005	0	2.15673	0.463666	0.201005		1.32597e-05	0.00045683	0.201233	0.0622237
						-0.31337	0.314028	2.16009	0.462943	0.261366		8.56147e-06	0.000639593	0.261686	0.028696		-0.19583	0.200548	2.16045	0.462866	0.24581		8.15579e-06	0.000610543	0.246115	0.028637		0	0.200548	2.15667	0.463679	0.201462		1.32597e-05	0.00045683	0.20169	0.0622237		-0.200548	0	2.15667	0.463679	0.201462		1.32597e-05	0.00045683	0.20169	0.0622237
						-0.313827	0.314475	2.16005	0.462952	0.262006		8.56299e-06	0.000639713	0.262326	0.0286958		-0.195425	0.200091	2.16042	0.462874	0.24642		8.16424e-06	0.000611146	0.246726	0.0286384		0	0.200091	2.1566	0.463692	0.201919		1.32597e-05	0.00045683	0.202147	0.0622237		-0.200091	0	2.1566	0.463692	0.201919		1.32597e-05	0.00045683	0.202147	0.0622237
						-0.314284	0.314923	2.16001	0.46296	0.262646		8.56448e-06	0.000639829	0.262965	0.0286956		-0.195019	0.199635	2.16038	0.462882	0.247031		8.17252e-06	0.000611737	0.247337	0.0286397		0	0.199635	2.15654	0.463705	0.202376		1.32597e-05	0.00045683	0.202604	0.0622237		-0.199635	0	2.15654	0.463705	0.202376		1.32597e-05	0.00045683	0.202604	0.0622237
						-0.314741	0.315371	2.15997	0.462969	0.263285		8.56594e-06	0.000639943	0.263605	0.0286954		-0.194613	0.199178	2.16034	0.46289	0.247643		8.18066e-06	0.000612319	0.247949	0.028641		0	0.199178	2.15648	0.463719	0.202832		1.32597e-05	0.00045683	0.203061	0.0622237		-0.199178	0	2.15648	0.463719	0.202832		1.32597e-05	0.00045683	0.203061	0.0622237
						-0.315198	0.315819	2.15993	0.462978	0.263925		8.56736e-06	0.000640054	0.264245	0.0286951		-0.194205	0.198721	2.1603	0.462898	0.248256		8.18864e-06	0.00061289	0.248562	0.0286422		0	0.198721	2.15642	0.463732	0.203289		1.32597e-05	0.00045683	0.203518	0.0622237		-0.198721	0	2.15642	0.463732	0.203289		1.32597e-05	0.00045683	0.203518	0.0622237
						-0.315655	0.316268	2.15989	0.462986	0.264565		8.63399e-06	0.000640162	0.264885	0.0289134		-0.193796	0.198264	2.16026	0.462906	0.248868		8.19648e-06	0.000613452	0.249175	0.0286434		0	0.198264	2.15636	0.463745	0.203746		1.32597e-05	0.00045683	0.203974	0.0622237		-0.198264	0	2.15636	0.463745	0.203746		1.32597e-05	0.00045683	0.203974	0.0622237
						-0.316111	0.316716	2.15985	0.462995	0.265206		8.78987e-06	0.00064026	0.265526	0.0294309		-0.193387	0.197807	2.16023	0.462915	0.249482		8.20417e-06	0.000614004	0.249789	0.0286445		0	0.197807	2.1563	0.463758	0.204203		1.32597e-05	0.00045683	0.204431	0.0622237		-0.197807	0	2.1563	0.463758	0.204203		1.32597e-05	0.00045683	0.204431	0.0622237
						-0.316568	0.317165	2.15981	0.463004	0.265846		8.99604e-06	0.000640339	0.266166	0.0301175		-0.192977	0.19735	2.16019	0.462923	0.250096		8.21173e-06	0.000614546	0.250403	0.0286456		0	0.19735	2.15623	0.463772	0.20466		1.32597e-05	0.00045683	0.204888	0.0622237		-0.19735	0	2.15623	0.463772	0.20466		1.32597e-05	0.00045683	0.204888	0.0622237
						-0.317025	0.317613	2.15977	0.463013	0.266486		9.0042e-06	0.000640439	0.266806	0.0301401		-0.192566	0.196894	2.16015	0.462931	0.25071		8.21916e-06	0.00061508	0.251018	0.0286466		0	0.196894	2.15617	0.463785	0.205116		1.32597e-05	0.00045683	0.205345	0.0622237		-0.196894	0	2.15617	0.463785	0.205116		1.32597e-05	0.00045683	0.205345	0.0622237
						-0.317482	0.318062	2.15973	0.463022	0.267127		9.00552e-06	0.000640537	0.267447	0.03014		-0.192154	0.196437	2.16011	0.462939	0.251326		8.22645e-06	0.000615605	0.251633	0.0286476		0	0.196437	2.15611	0.463798	0.205573		1.32597e-05	0.00045683	0.205802	0.0622237		-0.196437	0	2.15611	0.463798	0.205573		1.32597e-05	0.00045683	0.205802	0.0622237
						-0.317939	0.318511	2.15968	0.463031	0.267767		9.00682e-06	0.000640632	0.268087	0.0301398		-0.191741	0.19598	2.16007	0.462947	0.251941		8.4906e-06	0.000616121	0.252249	0.0295427		0	0.19598	2.15605	0.463811	0.20603		1.26366e-05	0.00045683	0.206259	0.0593		-0.19598	0	2.15605	0.463811	0.20603		1.26366e-05	0.00045683	0.206259	0.0593
						-0.318396	0.31896	2.15964	0.46304	0.268408		9.00808e-06	0.000640726	0.268728	0.0301396		-0.191328	0.195523	2.16003	0.462956	0.252557		8.51903e-06	0.000616541	0.252866	0.0296214		0	0.195523	2.15599	0.463824	0.206487		1.26366e-05	0.00045683	0.206715	0.0593		-0.195523	0	2.15599	0.463824	0.206487		1.26366e-05	0.00045683	0.206715	0.0593
						-0.318852	0.31941	2.1596	0.463049	0.269048		9.00931e-06	0.000640818	0.269369	0.0301394		-0.190914	0.195066	2.15999	0.462964	0.253174		8.72976e-06	0.00061696	0.253482	0.0303335		0	0.195066	2.15593	0.463837	0.206944		1.26366e-05	0.00045683	0.207172	0.0593		-0.195066	0	2.15593	0.463837	0.206944		1.26366e-05	0.00045683	0.207172	0.0593
						-0.319309	0.319859	2.15956	0.463058	0.269689		9.01052e-06	0.000640907	0.27001	0.0301393		-0.190499	0.194609	2.15995	0.462973	0.253791		8.73667e-06	0.000617432	0.254099	0.0303343		0	0.194609	2.15587	0.463849	0.207401		1.26366e-05	0.00045683	0.207629	0.0593		-0.194609	0	2.15587	0.463849	0.207401		1.26366e-05	0.00045683	0.207629	0.0593
						-0.319766	0.320308	2.15952	0.463067	0.27033		9.0117e-06	0.000640995	0.270651	0.0301391		-0.190084	0.194153	2.15991	0.462982	0.254408		8.74347e-06	0.000617896	0.254717	0.0303351		0	0.194153	2.15581	0.463862	0.207857		1.26366e-05	0.00045683	0.208086	0.0593		-0.194153	0	2.15581	0.463862	0.207857		1.26366e-05	0.00045683	0.208086	0.0593
						-0.320223	0.320758	2.15947	0.463076	0.270971		9.01286e-06	0.00064108	0.271292	0.0301389		-0.189668	0.193696	2.15987	0.462991	0.255026		8.75015e-06	0.000618352	0.255335	0.0303359		0	0.193696	2.15575	0.463875	0.208314		1.26366e-05	0.00045683	0.208543	0.0593		-0.193696	0	2.15575	0.463875	0.208314		1.26366e-05	0.00045683	0.208543	0.0593
						-0.32068	0.321208	2.15943	0.463085	0.271612		9.0353e-06	0.000641164	0.271933	0.03021		-0.189251	0.193239	2.15983	0.462999	0.255644		8.75672e-06	0.000618802	0.255954	0.0303366		0	0.193239	2.1557	0.463887	0.208771		1.26366e-05	0.00045683	0.209	0.0593		-0.193239	0	2.1557	0.463887	0.208771		1.26366e-05	0.00045683	0.209	0.0593
						-0.321137	0.321658	2.15939	0.463094	0.272253		9.2078e-06	0.000641242	0.272574	0.030783		-0.188833	0.192782	2.15979	0.463008	0.256263		8.76319e-06	0.000619244	0.256573	0.0303373		0	0.192782	2.15564	0.4639	0.209228		1.26366e-05	0.00045683	0.209456	0.0593		-0.192782	0	2.15564	0.4639	0.209228		1.26366e-05	0.00045683	0.209456	0.0593
						-0.321593	0.322108	2.15935	0.463103	0.272895		9.38683e-06	0.000641289	0.273215	0.0313793		-0.188415	0.192325	2.15975	0.463017	0.256882		8.76955e-06	0.00061968	0.257192	0.030338		0	0.192325	2.15558	0.463913	0.209685		1.26366e-05	0.00045683	0.209913	0.0593		-0.192325	0	2.15558	0.463913	0.209685		1.26366e-05	0.00045683	0.209913	0.0593
						-0.32205	0.322558	2.1593	0.463112	0.273536		9.39385e-06	0.000641366	0.273857	0.0313989		-0.187997	0.191868	2.15971	0.463026	0.257502		8.7758e-06	0.000620109	0.257812	0.0303387		0	0.191868	2.15552	0.463925	0.210142		1.26366e-05	0.00045683	0.21037	0.0593		-0.191868	0	2.15552	0.463925	0.210142		1.26366e-05	0.00045683	0.21037	0.0593
						-0.322507	0.323008	2.15926	0.463122	0.274177		9.39492e-06	0.000641443	0.274498	0.0313988		-0.187577	0.191412	2.15967	0.463034	0.258122		8.78196e-06	0.000620532	0.258433	0.0303393		0	0.191412	2.15546	0.463938	0.210598		1.26366e-05	0.00045683	0.210827	0.0593		-0.191412	0	2.15546	0.463938	0.210598		1.26366e-05	0.00045683	0.210827	0.0593
						-0.322964	0.323458	2.15922	0.463131	0.274819		9.39598e-06	0.000641518	0.27514	0.0313987		-0.187157	0.190955	2.15963	0.463043	0.258743		9.01803e-06	0.000620948	0.259053	0.0311339		0	0.190955	2.1554	0.46395	0.211055		1.20526e-05	0.00045683	0.211284	0.0565594		-0.190955	0	2.1554	0.46395	0.211055		1.20526e-05	0.00045683	0.211284	0.0565594
						-0.323421	0.323909	2.15917	0.46314	0.27546		9.39702e-06	0.000641591	0.275781	0.0313985		-0.186737	0.190498	2.15958	0.463052	0.259364		9.02276e-06	0.000621273	0.259674	0.031134		0	0.190498	2.15535	0.463963	0.211512		1.20526e-05	0.00045683	0.211741	0.0565594		-0.190498	0	2.15535	0.463963	0.211512		1.20526e-05	0.00045683	0.211741	0.0565594
						-0.323877	0.324359	2.15913	0.46315	0.276102		9.39803e-06	0.000641663	0.276423	0.0313984		-0.186316	0.190041	2.15954	0.463061	0.259985		9.04474e-06	0.000621591	0.260296	0.0311938		0	0.190041	2.15529	0.463975	0.211969		1.20526e-05	0.00045683	0.212197	0.0565594		-0.190041	0	2.15529	0.463975	0.211969		1.20526e-05	0.00045683	0.212197	0.0565594
						-0.324334	0.32481	2.15908	0.463159	0.276744		9.39902e-06	0.000641734	0.277064	0.0313983		-0.185894	0.189584	2.1595	0.46307	0.260607		9.23836e-06	0.00062191	0.260918	0.0318453		0	0.189584	2.15523	0.463987	0.212426		1.20526e-05	0.00045683	0.212654	0.0565594		-0.189584	0	2.15523	0.463987	0.212426		1.20526e-05	0.00045683	0.212654	0.0565594
						-0.324791	0.32526	2.15904	0.463169	0.277385		9.4e-06	0.000641803	0.277706	0.0313981		-0.185472	0.189127	2.15946	0.46308	0.261229		9.24409e-06	0.000622286	0.26154	0.0318458		0	0.189127	2.15518	0.463999	0.212883		1.20526e-05	0.00045683	0.213111	0.0565594		-0.189127	0	2.15518	0.463999	0.212883		1.20526e-05	0.00045683	0.213111	0.0565594
						-0.325248	0.325711	2.159	0.463178	0.278027		9.40095e-06	0.000641871	0.278348	0.031398		-0.18505	0.188671	2.15941	0.463089	0.261851		9.24973e-06	0.000622656	0.262162	0.0318463		0	0.188671	2.15512	0.464011	0.213339		1.20526e-05	0.00045683	0.213568	0.0565594		-0.188671	0	2.15512	0.464011	0.213339		1.20526e-05	0.00045683	0.213568	0.0565594
						-0.325705	0.326162	2.15895	0.463187	0.278669		9.40188e-06	0.000641937	0.27899	0.0313979		-0.184627	0.188214	2.15937	0.463098	0.262473		9.25529e-06	0.000623021	0.262785	0.0318467		0	0.188214	2.15507	0.464023	0.213796		1.20526e-05	0.00045683	0.214025	0.0565594		-0.188214	0	2.15507	0.464023	0.213796		1.20526e-05	0.00045683	0.214025	0.0565594
						-0.326162	0.326613	2.15891	0.463197	0.279311		9.5603e-06	0.000642002	0.279632	0.0319237		-0.184203	0.187757	2.15933	0.463107	0.263096		9.26077e-06	0.000623381	0.263408	0.0318472		0	0.187757	2.15501	0.464035	0.214253		1.20526e-05	0.00045683	0.214481	0.0565594		-0.187757	0	2.15501	0.464035	0.214253		1.20526e-05	0.00045683	0.214481	0.0565594
						-0.326618	0.327064	2.15886	0.463206	0.279953		9.71934e-06	0.000642022	0.280274	0.0324537		-0.183779	0.1873	2.15928	0.463117	0.26372		9.26616e-06	0.000623736	0.264032	0.0318476		0	0.1873	2.15495	0.464047	0.21471		1.20526e-05	0.00045683	0.214938	0.0565594		-0.1873	0	2.15495	0.464047	0.21471		1.20526e-05	0.00045683	0.214938	0.0565594
						-0.327075	0.327515	2.15882	0.463216	0.280595		9.72526e-06	0.000642083	0.280916	0.0324704		-0.183354	0.186843	2.15924	0.463126	0.264344		9.27148e-06	0.000624087	0.264656	0.031848		0	0.186843	2.1549	0.464059	0.215167		1.20526e-05	0.00045683	0.215395	0.0565594		-0.186843	0	2.1549	0.464059	0.215167		1.20526e-05	0.00045683	0.215395	0.0565594
						-0.327532	0.327967	2.15877	0.463226	0.281237		9.72615e-06	0.000642144	0.281558	0.0324703		-0.182929	0.186386	2.1592	0.463135	0.264968		9.27673e-06	0.000624432	0.26528	0.0318484		0	0.186386	2.15484	0.464071	0.215624		1.20526e-05	0.00045683	0.215852	0.0565594		-0.186386	0	2.15484	0.464071	0.215624		1.20526e-05	0.00045683	0.215852	0.0565594
						-0.327989	0.328418	2.15873	0.463236	0.281879		9.72703e-06	0.000642204	0.2822	0.0324702		-0.182503	0.18593	2.15915	0.463144	0.265592		9.48419e-06	0.000624773	0.265904	0.0325429		0	0.18593	2.15479	0.464083	0.21608		1.15037e-05	0.00045683	0.216309	0.0539835		-0.18593	0	2.15479	0.464083	0.21608		1.15037e-05	0.00045683	0.216309	0.0539835
						-0.328446	0.328869	2.15868	0.463245	0.282521		9.72789e-06	0.000642263	0.282842	0.0324701		-0.182077	0.185473	2.15911	0.463154	0.266217		9.48803e-06	0.000625026	0.266529	0.0325429		0	0.185473	2.15473	0.464095	0.216537		1.15037e-05	0.00045683	0.216766	0.0539835		-0.185473	0	2.15473	0.464095	0.216537		1.15037e-05	0.00045683	0.216766	0.0539835
						-0.328903	0.329321	2.15864	0.463255	0.283164		9.72874e-06	0.000642321	0.283485	0.03247		-0.18165	0.185016	2.15907	0.463163	0.266842		9.4918e-06	0.000625274	0.267155	0.0325428		0	0.185016	2.15468	0.464106	0.216994		1.15037e-05	0.00045683	0.217222	0.0539835		-0.185016	0	2.15468	0.464106	0.216994		1.15037e-05	0.00045683	0.217222	0.0539835
						-0.329359	0.329772	2.15859	0.463265	0.283806		9.72956e-06	0.000642378	0.284127	0.0324699		-0.181223	0.184559	2.15902	0.463173	0.267467		9.54186e-06	0.000625519	0.26778	0.0327017		0	0.184559	2.15463	0.464118	0.217451		1.15037e-05	0.00045683	0.217679	0.0539835		-0.184559	0	2.15463	0.464118	0.217451		1.15037e-05	0.00045683	0.217679	0.0539835
						-0.329816	0.330224	2.15855	0.463274	0.284448		9.73038e-06	0.000642434	0.28477	0.0324698		-0.180796	0.184102	2.15898	0.463182	0.268093		9.68237e-06	0.000625776	0.268406	0.0331696		0	0.184102	2.15457	0.464129	0.217908		1.15037e-05	0.00045683	0.218136	0.0539835		-0.184102	0	2.15457	0.464129	0.217908		1.15037e-05	0.00045683	0.218136	0.0539835
						-0.330273	0.330676	2.1585	0.463284	0.285091		9.73117e-06	0.000642488	0.285412	0.0324697		-0.180368	0.183646	2.15893	0.463192	0.268718		9.68717e-06	0.000626081	0.269032	0.0331699		0	0.183646	2.15452	0.464141	0.218365		1.15037e-05	0.00045683	0.218593	0.0539835		-0.183646	0	2.15452	0.464141	0.218365		1.15037e-05	0.00045683	0.218593	0.0539835
						-0.33073	0.331127	2.15846	0.463294	0.285733		9.73196e-06	0.000642542	0.286055	0.0324696		-0.17994	0.183189	2.15889	0.463202	0.269345		9.69192e-06	0.000626383	0.269658	0.0331702		0	0.183189	2.15447	0.464152	0.218821		1.15037e-05	0.00045683	0.21905	0.0539835		-0.183189	0	2.15447	0.464152	0.218821		1.15037e-05	0.00045683	0.21905	0.0539835
						-0.331187	0.331579	2.15841	0.463304	0.286376		9.84514e-06	0.000642595	0.286697	0.0328445		-0.179512	0.182732	2.15884	0.463211	0.269971		9.6966e-06	0.00062668	0.270284	0.0331704		0	0.182732	2.15441	0.464164	0.219278		1.15037e-05	0.00045683	0.219507	0.0539835		-0.182732	0	2.15441	0.464164	0.219278		1.15037e-05	0.00045683	0.219507	0.0539835
						-0.331644	0.332031	2.15837	0.463314	0.287018		9.99358e-06	0.000642596	0.28734	0.0333396		-0.179083	0.182275	2.1588	0.463221	0.270598		9.70122e-06	0.000626974	0.270911	0.0331707		0	0.182275	2.15436	0.464175	0.219735		1.15037e-05	0.00045683	0.219963	0.0539835		-0.182275	0	2.15436	0.464175	0.219735		1.15037e-05	0.00045683	0.219963	0.0539835
						-0.3321	0.332483	2.15832	0.463323	0.287661		9.99846e-06	0.000642645	0.287982	0.0333533		-0.178653	0.181818	2.15875	0.463231	0.271225		9.70578e-06	0.000627264	0.271538	0.033171		0	0.181818	2.15431	0.464187	0.220192		1.15037e-05	0.00045683	0.22042	0.0539835		-0.181818	0	2.15431	0.464187	0.220192		1.15037e-05	0.00045683	0.22042	0.0539835
						-0.332557	0.332935	2.15827	0.463333	0.288304		9.99921e-06	0.000642695	0.288625	0.0333533		-0.178224	0.181361	2.15871	0.463241	0.271852		9.71029e-06	0.00062755	0.272166	0.0331712		0	0.181361	2.15425	0.464198	0.220649		1.15037e-05	0.00045683	0.220877	0.0539835		-0.181361	0	2.15425	0.464198	0.220649		1.15037e-05	0.00045683	0.220877	0.0539835
						-0.333014	0.333387	2.15823	0.463343	0.288946		9.99995e-06	0.000642744	0.289268	0.0333532		-0.177793	0.180905	2.15866	0.46325	0.272479		9.88886e-06	0.000627833	0.272793	0.033766		0	0.180905	2.1542	0.46421	0.221106		1.09863e-05	0.00045683	0.221334	0.0515556		-0.180905	0	2.1542	0.46421	0.221106		1.09863e-05	0.00045683	0.221334	0.0515556
						-0.333471	0.333839	2.15818	0.463353	0.289589		1.00007e-05	0.000642793	0.28991	0.0333531		-0.177363	0.180448	2.15861	0.46326	0.273107		9.89198e-06	0.000628032	0.273421	0.033766		0	0.180448	2.15415	0.464221	0.221562		1.09863e-05	0.00045683	0.221791	0.0515556		-0.180448	0	2.15415	0.464221	0.221562		1.09863e-05	0.00045683	0.221791	0.0515556
						-0.333928	0.334291	2.15813	0.463363	0.290232		1.00014e-05	0.00064284	0.290553	0.033353		-0.176932	0.179991	2.15857	0.46327	0.273735		9.89505e-06	0.000628228	0.274049	0.0337659		0	0.179991	2.1541	0.464232	0.222019		1.09863e-05	0.00045683	0.222248	0.0515556		-0.179991	0	2.1541	0.464232	0.222019		1.09863e-05	0.00045683	0.222248	0.0515556
						-0.334385	0.334744	2.15809	0.463373	0.290875		1.00021e-05	0.000642887	0.291196	0.0333529		-0.1765	0.179534	2.15852	0.46328	0.274364		9.89808e-06	0.00062842	0.274678	0.0337659		0	0.179534	2.15405	0.464243	0.222476		1.09863e-05	0.00045683	0.222704	0.0515556		-0.179534	0	2.15405	0.464243	0.222476		1.09863e-05	0.00045683	0.222704	0.0515556
						-0.334841	0.335196	2.15804	0.463383	0.291518		1.00028e-05	0.000642933	0.291839	0.0333528		-0.176069	0.179077	2.15848	0.46329	0.274992		9.9897e-06	0.00062861	0.275306	0.0340682		0	0.179077	2.154	0.464254	0.222933		1.09863e-05	0.00045683	0.223161	0.0515556		-0.179077	0	2.154	0.464254	0.222933		1.09863e-05	0.00045683	0.223161	0.0515556
						-0.335298	0.335648	2.15799	0.463394	0.292161		1.00034e-05	0.000642978	0.292482	0.0333527		-0.175637	0.17862	2.15843	0.4633	0.275621		1.00627e-05	0.000628835	0.275935	0.0343047		0	0.17862	2.15394	0.464265	0.22339		1.09863e-05	0.00045683	0.223618	0.0515556		-0.17862	0	2.15394	0.464265	0.22339		1.09863e-05	0.00045683	0.223618	0.0515556
						-0.335755	0.336101	2.15795	0.463404	0.292803		1.00041e-05	0.000643022	0.293125	0.0333526		-0.175205	0.178164	2.15838	0.46331	0.276249		1.00668e-05	0.000629087	0.276564	0.0343049		0	0.178164	2.15389	0.464275	0.223847		1.09863e-05	0.00045683	0.224075	0.0515556		-0.178164	0	2.15389	0.464275	0.223847		1.09863e-05	0.00045683	0.224075	0.0515556
						-0.336212	0.336553	2.1579	0.463414	0.293447		1.00813e-05	0.000643066	0.293768	0.0336078		-0.174772	0.177707	2.15834	0.46332	0.276878		1.00708e-05	0.000629336	0.277193	0.0343051		0	0.177707	2.15384	0.464286	0.224303		1.09863e-05	0.00045683	0.224532	0.0515556		-0.177707	0	2.15384	0.464286	0.224303		1.09863e-05	0.00045683	0.224532	0.0515556
						-0.336669	0.337006	2.15785	0.463424	0.29409		1.02099e-05	0.000643052	0.294411	0.0340371		-0.17434	0.17725	2.15829	0.46333	0.277508		1.00748e-05	0.000629582	0.277823	0.0343053		0	0.17725	2.15379	0.464297	0.22476		1.09863e-05	0.00045683	0.224989	0.0515556		-0.17725	0	2.15379	0.464297	0.22476		1.09863e-05	0.00045683	0.224989	0.0515556
						-0.337126	0.337459	2.15781	0.463434	0.294733		1.02137e-05	0.000643092	0.295054	0.0340479		-0.173906	0.176793	2.15824	0.46334	0.278137		1.00787e-05	0.000629826	0.278452	0.0343054		0	0.176793	2.15374	0.464308	0.225217		1.09863e-05	0.00045683	0.225445	0.0515556		-0.176793	0	2.15374	0.464308	0.225217		1.09863e-05	0.00045683	0.225445	0.0515556
						-0.337582	0.337911	2.15776	0.463444	0.295376		1.02144e-05	0.000643133	0.295697	0.0340478		-0.173473	0.176336	2.15819	0.46335	0.278767		1.00826e-05	0.000630067	0.279082	0.0343056		0	0.176336	2.15369	0.464319	0.225674		1.09863e-05	0.00045683	0.225902	0.0515556		-0.176336	0	2.15369	0.464319	0.225674		1.09863e-05	0.00045683	0.225902	0.0515556
						-0.338039	0.338364	2.15771	0.463454	0.296019		1.0215e-05	0.000643175	0.29634	0.0340477		-0.173039	0.175879	2.15815	0.46336	0.279397		1.02323e-05	0.000630306	0.279712	0.0348015		0	0.175879	2.15364	0.46433	0.226131		1.04973e-05	0.00045683	0.226359	0.0492608		-0.175879	0	2.15364	0.46433	0.226131		1.04973e-05	0.00045683	0.226359	0.0492608
						-0.338496	0.338817	2.15766	0.463464	0.296662		1.02156e-05	0.000643215	0.296984	0.0340476		-0.172605	0.175423	2.1581	0.463371	0.280028		1.02348e-05	0.000630464	0.280343	0.0348014		0	0.175423	2.15359	0.464341	0.226587		1.04973e-05	0.00045683	0.226816	0.0492608		-0.175423	0	2.15359	0.464341	0.226587		1.04973e-05	0.00045683	0.226816	0.0492608
						-0.338953	0.339269	2.15762	0.463475	0.297305		1.02162e-05	0.000643255	0.297627	0.0340476		-0.17217	0.174966	2.15805	0.463381	0.280658		1.02373e-05	0.000630619	0.280973	0.0348014		0	0.174966	2.15354	0.464351	0.227044		1.04973e-05	0.00045683	0.227273	0.0492608		-0.174966	0	2.15354	0.464351	0.227044		1.04973e-05	0.00045683	0.227273	0.0492608
						-0.33941	0.339722	2.15757	0.463485	0.297948		1.02168e-05	0.000643294	0.29827	0.0340475		-0.171735	0.174509	2.158	0.463391	0.281289		1.02398e-05	0.000630772	0.281604	0.0348013		0	0.174509	2.15349	0.464362	0.227501		1.04973e-05	0.00045683	0.22773	0.0492608		-0.174509	0	2.15349	0.464362	0.227501		1.04973e-05	0.00045683	0.22773	0.0492608
						-0.339867	0.340175	2.15752	0.463495	0.298592		1.02174e-05	0.000643333	0.298913	0.0340474		-0.1713	0.174052	2.15796	0.463401	0.281919		1.02422e-05	0.000630923	0.282235	0.0348013		0	0.174052	2.15344	0.464372	0.227958		1.04973e-05	0.00045683	0.228186	0.0492608		-0.174052	0	2.15344	0.464372	0.227958		1.04973e-05	0.00045683	0.228186	0.0492608
						-0.340323	0.340628	2.15747	0.463505	0.299235		1.0218e-05	0.000643371	0.299557	0.0340473		-0.170865	0.173595	2.15791	0.463411	0.28255		1.03735e-05	0.000631071	0.282866	0.035239		0	0.173595	2.1534	0.464383	0.228415		1.04973e-05	0.00045683	0.228643	0.0492608		-0.173595	0	2.1534	0.464383	0.228415		1.04973e-05	0.00045683	0.228643	0.0492608
						-0.34078	0.341081	2.15743	0.463516	0.299878		1.02186e-05	0.000643408	0.3002	0.0340473		-0.17043	0.173138	2.15786	0.463422	0.283181		1.03803e-05	0.000631284	0.283497	0.0352504		0	0.173138	2.15335	0.464393	0.228872		1.04973e-05	0.00045683	0.2291	0.0492608		-0.173138	0	2.15335	0.464393	0.228872		1.04973e-05	0.00045683	0.2291	0.0492608
						-0.341237	0.341534	2.15738	0.463526	0.300522		1.02674e-05	0.000643445	0.300844	0.0342078		-0.169994	0.172682	2.15781	0.463432	0.283813		1.03838e-05	0.000631495	0.284128	0.0352505		0	0.172682	2.1533	0.464404	0.229328		1.04973e-05	0.00045683	0.229557	0.0492608		-0.172682	0	2.1533	0.464404	0.229328		1.04973e-05	0.00045683	0.229557	0.0492608
						-0.341694	0.341987	2.15733	0.463536	0.301165		1.03688e-05	0.000643417	0.301487	0.0345472		-0.169558	0.172225	2.15776	0.463443	0.284444		1.03873e-05	0.000631705	0.28476	0.0352506		0	0.172225	2.15325	0.464414	0.229785		1.04973e-05	0.00045683	0.230014	0.0492608		-0.172225	0	2.15325	0.464414	0.229785		1.04973e-05	0.00045683	0.230014	0.0492608
						-0.342151	0.342441	2.15728	0.463546	0.301809		1.03717e-05	0.00064345	0.30213	0.0345551		-0.169122	0.171768	2.15772	0.463453	0.285076		1.03908e-05	0.000631913	0.285392	0.0352507		0	0.171768	2.1532	0.464425	0.230242		1.04973e-05	0.00045683	0.230471	0.0492608		-0.171768	0	2.1532	0.464425	0.230242		1.04973e-05	0.00045683	0.230471	0.0492608
						-0.342608	0.342894	2.15723	0.463557	0.302452		1.03722e-05	0.000643486	0.302774	0.034555		-0.168685	0.171311	2.15767	0.463463	0.285708		1.03942e-05	0.000632119	0.286024	0.0352508		0	0.171311	2.15315	0.464435	0.230699		1.04973e-05	0.00045683	0.230927	0.0492608		-0.171311	0	2.15315	0.464435	0.230699		1.04973e-05	0.00045683	0.230927	0.0492608
						-0.343064	0.343347	2.15718	0.463567	0.303096		1.03728e-05	0.000643521	0.303417	0.034555		-0.168248	0.170854	2.15762	0.463474	0.28634		1.0515e-05	0.000632323	0.286656	0.0356491		0	0.170854	2.1531	0.464446	0.231156		1.00338e-05	0.00045683	0.231384	0.0470858		-0.170854	0	2.1531	0.464446	0.231156		1.00338e-05	0.00045683	0.231384	0.0470858
						-0.343521	0.3438	2.15714	0.463577	0.303739		1.03733e-05	0.000643556	0.304061	0.0345549		-0.167811	0.170397	2.15757	0.463484	0.286972		1.05171e-05	0.000632449	0.287288	0.0356491		0	0.170397	2.15306	0.464456	0.231613		1.00338e-05	0.00045683	0.231841	0.0470858		-0.170397	0	2.15306	0.464456	0.231613		1.00338e-05	0.00045683	0.231841	0.0470858
						-0.343978	0.344253	2.15709	0.463588	0.304383		1.03739e-05	0.00064359	0.304705	0.0345548		-0.167374	0.169941	2.15752	0.463495	0.287605		1.05191e-05	0.000632573	0.287921	0.035649		0	0.169941	2.15301	0.464466	0.232069		1.00338e-05	0.00045683	0.232298	0.0470858		-0.169941	0	2.15301	0.464466	0.232069		1.00338e-05	0.00045683	0.232298	0.0470858
						-0.344435	0.344707	2.15704	0.463598	0.305026		1.03744e-05	0.000643623	0.305348	0.0345548		-0.166936	0.169484	2.15747	0.463505	0.288237		1.05212e-05	0.000632695	0.288554	0.035649		0	0.169484	2.15296	0.464476	0.232526		1.00338e-05	0.00045683	0.232755	0.0470858		-0.169484	0	2.15296	0.464476	0.232526		1.00338e-05	0.00045683	0.232755	0.0470858
						-0.344892	0.34516	2.15699	0.463609	0.30567		1.03749e-05	0.000643657	0.305992	0.0345547		-0.166499	0.169027	2.15742	0.463516	0.28887		1.05232e-05	0.000632816	0.289186	0.035649		0	0.169027	2.15292	0.464486	0.232983		1.00338e-05	0.00045683	0.233212	0.0470858		-0.169027	0	2.15292	0.464486	0.232983		1.00338e-05	0.00045683	0.233212	0.0470858
						-0.345348	0.345614	2.15694	0.463619	0.306314		1.03754e-05	0.000643689	0.306635	0.0345547		-0.166061	0.16857	2.15737	0.463526	0.289503		1.05751e-05	0.000632935	0.289819	0.0358181		0	0.16857	2.15287	0.464496	0.23344		1.00338e-05	0.00045683	0.233668	0.0470858		-0.16857	0	2.15287	0.464496	0.23344		1.00338e-05	0.00045683	0.233668	0.0470858
						-0.345805	0.346067	2.1569	0.463629	0.306957		1.03759e-05	0.000643722	0.307279	0.0345546		-0.165623	0.168113	2.15733	0.463537	0.290136		1.06335e-05	0.000633084	0.290452	0.0360076		0	0.168113	2.15282	0.464506	0.233897		1.00338e-05	0.00045683	0.234125	0.0470858		-0.168113	0	2.15282	0.464506	0.233897		1.00338e-05	0.00045683	0.234125	0.0470858
						-0.346262	0.346521	2.15685	0.46364	0.307601		1.04024e-05	0.000643753	0.307923	0.0346413		-0.165184	0.167656	2.15728	0.463548	0.290769		1.06366e-05	0.000633266	0.291085	0.0360077		0	0.167656	2.15278	0.464516	0.234354		1.00338e-05	0.00045683	0.234582	0.0470858		-0.167656	0	2.15278	0.464516	0.234354		1.00338e-05	0.00045683	0.234582	0.0470858
						-0.346719	0.346974	2.1568	0.46365	0.308245		1.0471e-05	0.000643712	0.308567	0.0348719		-0.164746	0.1672	2.15723	0.463558	0.291402		1.06397e-05	0.000633447	0.291719	0.0360077		0	0.1672	2.15273	0.464526	0.23481		1.00338e-05	0.00045683	0.235039	0.0470858		-0.1672	0	2.15273	0.464526	0.23481		1.00338e-05	0.00045683	0.235039	0.0470858
						-0.347176	0.347428	2.15675	0.463661	0.308889		1.0473e-05	0.00064374	0.30921	0.0348769		-0.164307	0.166743	2.15718	0.463569	0.292036		1.06427e-05	0.000633627	0.292352	0.0360077		0	0.166743	2.15268	0.464536	0.235267		1.00338e-05	0.00045683	0.235496	0.0470858		-0.166743	0	2.15268	0.464536	0.235267		1.00338e-05	0.00045683	0.235496	0.0470858
						-0.347633	0.347881	2.1567	0.463671	0.309532		1.04735e-05	0.000643771	0.309854	0.0348769		-0.163868	0.166286	2.15713	0.463579	0.292669		1.06457e-05	0.000633804	0.292986	0.0360078		0	0.166286	2.15264	0.464546	0.235724		1.00338e-05	0.00045683	0.235952	0.0470858		-0.166286	0	2.15264	0.464546	0.235724		1.00338e-05	0.00045683	0.235952	0.0470858
						-0.348089	0.348335	2.15665	0.463682	0.310176		1.0474e-05	0.000643802	0.310498	0.0348768		-0.163428	0.165829	2.15708	0.46359	0.293303		1.07381e-05	0.000633981	0.29362	0.0363103		0	0.165829	2.15259	0.464556	0.236181		9.59328e-06	0.00045683	0.236409	0.0450185		-0.165829	0	2.15259	0.464556	0.236181		9.59328e-06	0.00045683	0.236409	0.0450185
						-0.348546	0.348788	2.1566	0.463692	0.31082		1.04744e-05	0.000643832	0.311142	0.0348767		-0.162989	0.165372	2.15703	0.463601	0.293937		1.07398e-05	0.000634082	0.294254	0.0363103		0	0.165372	2.15255	0.464566	0.236638		9.59328e-06	0.00045683	0.236866	0.0450185		-0.165372	0	2.15255	0.464566	0.236638		9.59328e-06	0.00045683	0.236866	0.0450185
						-0.349003	0.349242	2.15656	0.463703	0.311464		1.04749e-05	0.000643862	0.311786	0.0348767		-0.162549	0.164915	2.15698	0.463612	0.294571		1.07415e-05	0.000634182	0.294888	0.0363103		0	0.164915	2.1525	0.464575	0.237095		9.59328e-06	0.00045683	0.237323	0.0450185		-0.164915	0	2.1525	0.464575	0.237095		9.59328e-06	0.00045683	0.237323	0.0450185
						-0.34946	0.349696	2.15651	0.463713	0.312108		1.04754e-05	0.000643892	0.312429	0.0348766		-0.162109	0.164459	2.15693	0.463622	0.295205		1.07432e-05	0.000634281	0.295522	0.0363102		0	0.164459	2.15246	0.464585	0.237551		9.59328e-06	0.00045683	0.23778	0.0450185		-0.164459	0	2.15246	0.464585	0.237551		9.59328e-06	0.00045683	0.23778	0.0450185
						-0.349917	0.35015	2.15646	0.463723	0.312751		1.04758e-05	0.000643921	0.313073	0.0348766		-0.161669	0.164002	2.15688	0.463633	0.295839		1.07448e-05	0.000634379	0.296157	0.0363102		0	0.164002	2.15241	0.464595	0.238008		9.59328e-06	0.00045683	0.238237	0.0450185		-0.164002	0	2.15241	0.464595	0.238008		9.59328e-06	0.00045683	0.238237	0.0450185
						-0.350374	0.350603	2.15641	0.463734	0.313395		1.04763e-05	0.00064395	0.313717	0.0348765		-0.161229	0.163545	2.15683	0.463644	0.296474		1.07492e-05	0.000634475	0.296791	0.0363195		0	0.163545	2.15237	0.464604	0.238465		9.59328e-06	0.00045683	0.238693	0.0450185		-0.163545	0	2.15237	0.464604	0.238465		9.59328e-06	0.00045683	0.238693	0.0450185
						-0.35083	0.351057	2.15636	0.463744	0.314039		1.04767e-05	0.000643978	0.314361	0.0348765		-0.160789	0.163088	2.15678	0.463655	0.297108		1.08276e-05	0.000634573	0.297426	0.0365789		0	0.163088	2.15233	0.464614	0.238922		9.59328e-06	0.00045683	0.23915	0.0450185		-0.163088	0	2.15233	0.464614	0.238922		9.59328e-06	0.00045683	0.23915	0.0450185
						-0.351287	0.351511	2.15631	0.463755	0.314683		1.04861e-05	0.000644006	0.315005	0.0349062		-0.160348	0.162631	2.15673	0.463665	0.297743		1.08304e-05	0.000634731	0.29806	0.0365789		0	0.162631	2.15228	0.464623	0.239379		9.59328e-06	0.00045683	0.239607	0.0450185		-0.162631	0	2.15228	0.464623	0.239379		9.59328e-06	0.00045683	0.239607	0.0450185
						-0.351744	0.351965	2.15626	0.463765	0.315327		1.05173e-05	0.000643953	0.315649	0.0350129		-0.159908	0.162175	2.15668	0.463676	0.298378		1.08331e-05	0.000634889	0.298695	0.0365789		0	0.162175	2.15224	0.464633	0.239836		9.59328e-06	0.00045683	0.240064	0.0450185		-0.162175	0	2.15224	0.464633	0.239836		9.59328e-06	0.00045683	0.240064	0.0450185
						-0.352201	0.352419	2.15621	0.463776	0.315971		1.05184e-05	0.000643976	0.316293	0.0350153		-0.159467	0.161718	2.15663	0.463687	0.299013		1.08357e-05	0.000635046	0.29933	0.0365789		0	0.161718	2.15219	0.464643	0.240292		9.59328e-06	0.00045683	0.240521	0.0450185		-0.161718	0	2.15219	0.464643	0.240292		9.59328e-06	0.00045683	0.240521	0.0450185
						-0.352658	0.352873	2.15616	0.463786	0.316615		1.05188e-05	0.000644004	0.316937	0.0350152		-0.159026	0.161261	2.15658	0.463698	0.299648		1.08384e-05	0.000635201	0.299965	0.0365789		0	0.161261	2.15215	0.464652	0.240749		9.59328e-06	0.00045683	0.240978	0.0450185		-0.161261	0	2.15215	0.464652	0.240749		9.59328e-06	0.00045683	0.240978	0.0450185
						-0.353115	0.353327	2.15612	0.463797	0.317259		1.05193e-05	0.000644032	0.317581	0.0350151		-0.158584	0.160804	2.15653	0.463709	0.300283		1.0903e-05	0.000635355	0.3006	0.0367881		0	0.160804	2.1521	0.464662	0.241206		9.1734e-06	0.00045683	0.241434	0.0430481		-0.160804	0	2.1521	0.464662	0.241206		9.1734e-06	0.00045683	0.241434	0.0430481
						-0.353571	0.353781	2.15607	0.463807	0.317903		1.05197e-05	0.000644059	0.318225	0.0350151		-0.158143	0.160347	2.15648	0.46372	0.300918		1.09044e-05	0.000635438	0.301236	0.036788		0	0.160347	2.15206	0.464671	0.241663		9.1734e-06	0.00045683	0.241891	0.0430481		-0.160347	0	2.15206	0.464671	0.241663		9.1734e-06	0.00045683	0.241891	0.0430481
						-0.354028	0.354235	2.15602	0.463818	0.318547		1.05201e-05	0.000644086	0.318869	0.035015		-0.157701	0.15989	2.15642	0.463731	0.301554		1.09058e-05	0.000635519	0.301871	0.036788		0	0.15989	2.15202	0.46468	0.24212		9.1734e-06	0.00045683	0.242348	0.0430481		-0.15989	0	2.15202	0.46468	0.24212		9.1734e-06	0.00045683	0.242348	0.0430481
						-0.354485	0.354689	2.15597	0.463828	0.319191		1.05205e-05	0.000644113	0.319513	0.035015		-0.157259	0.159434	2.15637	0.463741	0.302189		1.09072e-05	0.000635599	0.302507	0.036788		0	0.159434	2.15198	0.464689	0.242577		9.1734e-06	0.00045683	0.242805	0.0430481		-0.159434	0	2.15198	0.464689	0.242577		9.1734e-06	0.00045683	0.242805	0.0430481
						-0.354942	0.355143	2.15592	0.463839	0.319835		1.0521e-05	0.000644139	0.320158	0.0350149		-0.156817	0.158977	2.15632	0.463752	0.302825		1.09085e-05	0.000635679	0.303143	0.036788		0	0.158977	2.15193	0.464698	0.243033		9.1734e-06	0.00045683	0.243262	0.0430481		-0.158977	0	2.15193	0.464698	0.243033		9.1734e-06	0.00045683	0.243262	0.0430481
						-0.355399	0.355597	2.15587	0.46385	0.32048		1.05214e-05	0.000644165	0.320802	0.0350149		-0.156375	0.15852	2.15627	0.463763	0.30346		1.09099e-05	0.000635757	0.303778	0.0367879		0	0.15852	2.15189	0.464708	0.24349		9.1734e-06	0.00045683	0.243719	0.0430481		-0.15852	0	2.15189	0.464708	0.24349		9.1734e-06	0.00045683	0.243719	0.0430481
						-0.355856	0.356051	2.15582	0.46386	0.321124		1.05218e-05	0.000644191	0.321446	0.0350148		-0.155933	0.158063	2.15622	0.463774	0.304096		1.0946e-05	0.000635835	0.304414	0.0369052		0	0.158063	2.15185	0.464717	0.243947		9.1734e-06	0.00045683	0.244175	0.0430481		-0.158063	0	2.15185	0.464717	0.243947		9.1734e-06	0.00045683	0.244175	0.0430481
						-0.356312	0.356505	2.15577	0.463871	0.321768		1.05183e-05	0.000644216	0.32209	0.0350018		-0.155491	0.157606	2.15617	0.463785	0.304732		1.09666e-05	0.000635952	0.30505	0.036968		0	0.157606	2.15181	0.464726	0.244404		9.1734e-06	0.00045683	0.244632	0.0430481		-0.157606	0	2.15181	0.464726	0.244404		9.1734e-06	0.00045683	0.244632	0.0430481
						-0.356769	0.356959	2.15572	0.463881	0.322412		1.05082e-05	0.00064415	0.322734	0.0349718		-0.155048	0.157149	2.15612	0.463796	0.305368		1.0969e-05	0.000636091	0.305686	0.036968		0	0.157149	2.15176	0.464735	0.244861		9.1734e-06	0.00045683	0.245089	0.0430481		-0.157149	0	2.15176	0.464735	0.244861		9.1734e-06	0.00045683	0.245089	0.0430481
						-0.357226	0.357414	2.15568	0.463892	0.323056		1.05084e-05	0.000644168	0.323378	0.0349715		-0.154606	0.156693	2.15607	0.463807	0.306004		1.09714e-05	0.000636229	0.306322	0.036968		0	0.156693	2.15172	0.464744	0.245317		9.1734e-06	0.00045683	0.245546	0.0430481		-0.156693	0	2.15172	0.464744	0.245317		9.1734e-06	0.00045683	0.245546	0.0430481
						-0.357683	0.357868	2.15563	0.463902	0.323701		1.05088e-05	0.000644194	0.324023	0.0349714		-0.154163	0.156236	2.15602	0.463818	0.30664		1.09738e-05	0.000636367	0.306958	0.036968		0	0.156236	2.15168	0.464754	0.245774		9.1734e-06	0.00045683	0.246003	0.0430481		-0.156236	0	2.15168	0.464754	0.245774		9.1734e-06	0.00045683	0.246003	0.0430481
						-0.35814	0.358322	2.15558	0.463913	0.324345		1.05092e-05	0.00064422	0.324667	0.0349714		-0.15372	0.155779	2.15597	0.463829	0.307277		1.10113e-05	0.000636503	0.307595	0.0370866		0	0.155779	2.15164	0.464763	0.246231		8.77209e-06	0.00045683	0.24646	0.0411648		-0.155779	0	2.15164	0.464763	0.246231		8.77209e-06	0.00045683	0.24646	0.0411648
						-0.358597	0.358776	2.15553	0.463923	0.324989		1.05096e-05	0.000644245	0.325311	0.0349713		-0.153277	0.155322	2.15592	0.46384	0.307913		1.10125e-05	0.00063657	0.308231	0.0370866		0	0.155322	2.1516	0.464771	0.246688		8.77209e-06	0.00045683	0.246916	0.0411648		-0.155322	0	2.1516	0.464771	0.246688		8.77209e-06	0.00045683	0.246916	0.0411648
						-0.359053	0.35923	2.15548	0.463934	0.325633		1.051e-05	0.00064427	0.325955	0.0349713		-0.152833	0.154865	2.15586	0.463851	0.30855		1.10136e-05	0.000636637	0.308868	0.0370865		0	0.154865	2.15155	0.46478	0.247145		8.77209e-06	0.00045683	0.247373	0.0411648		-0.154865	0	2.15155	0.46478	0.247145		8.77209e-06	0.00045683	0.247373	0.0411648
						-0.35951	0.359685	2.15543	0.463944	0.326277		1.05104e-05	0.000644295	0.3266	0.0349712		-0.15239	0.154408	2.15581	0.463862	0.309186		1.10148e-05	0.000636702	0.309505	0.0370865		0	0.154408	2.15151	0.464789	0.247602		8.77209e-06	0.00045683	0.24783	0.0411648		-0.154408	0	2.15151	0.464789	0.247602		8.77209e-06	0.00045683	0.24783	0.0411648
						-0.359967	0.360139	2.15538	0.463955	0.326922		1.05108e-05	0.000644319	0.327244	0.0349712		-0.151946	0.153952	2.15576	0.463873	0.309823		1.10159e-05	0.000636767	0.310141	0.0370865		0	0.153952	2.15147	0.464798	0.248058		8.77209e-06	0.00045683	0.248287	0.0411648		-0.153952	0	2.15147	0.464798	0.248058		8.77209e-06	0.00045683	0.248287	0.0411648
						-0.360424	0.360593	2.15533	0.463965	0.327566		1.05111e-05	0.000644344	0.327888	0.0349711		-0.151503	0.153495	2.15571	0.463884	0.31046		1.1017e-05	0.000636832	0.310778	0.0370865		0	0.153495	2.15143	0.464807	0.248515		8.77209e-06	0.00045683	0.248744	0.0411648		-0.153495	0	2.15143	0.464807	0.248515		8.77209e-06	0.00045683	0.248744	0.0411648
						-0.360881	0.361048	2.15529	0.463976	0.32821		1.05115e-05	0.000644367	0.328533	0.0349711		-0.151059	0.153038	2.15566	0.463895	0.311097		1.10267e-05	0.000636895	0.311415	0.0371156		0	0.153038	2.15139	0.464815	0.248972		8.77209e-06	0.00045683	0.249201	0.0411648		-0.153038	0	2.15139	0.464815	0.248972		8.77209e-06	0.00045683	0.249201	0.0411648
						-0.361338	0.361502	2.15524	0.463986	0.328855		1.04986e-05	0.000644391	0.329177	0.0349268		-0.150615	0.152581	2.15561	0.463906	0.311734		1.10473e-05	0.000636977	0.312052	0.03718		0	0.152581	2.15135	0.464824	0.249429		8.77209e-06	0.00045683	0.249657	0.0411648		-0.152581	0	2.15135	0.464824	0.249429		8.77209e-06	0.00045683	0.249657	0.0411648
						-0.361794	0.361957	2.15519	0.463997	0.329499		1.04435e-05	0.000644311	0.329821	0.034748		-0.150172	0.152124	2.15556	0.463917	0.31237		1.10494e-05	0.000637101	0.312689	0.03718		0	0.152124	2.15131	0.464833	0.249886		8.77209e-06	0.00045683	0.250114	0.0411648		-0.152124	0	2.15131	0.464833	0.249886		8.77209e-06	0.00045683	0.250114	0.0411648
						-0.362251	0.362411	2.15514	0.464007	0.330143		1.04429e-05	0.000644326	0.330466	0.0347451		-0.149727	0.151667	2.15551	0.463928	0.313008		1.10515e-05	0.000637224	0.313326	0.0371799		0	0.151667	2.15127	0.464842	0.250343		8.77209e-06	0.00045683	0.250571	0.0411648		-0.151667	0	2.15127	0.464842	0.250343		8.77209e-06	0.00045683	0.250571	0.0411648
						-0.362708	0.362866	2.15509	0.464018	0.330788		1.04433e-05	0.00064435	0.33111	0.034745		-0.149283	0.151211	2.15545	0.463939	0.313645		1.10537e-05	0.000637346	0.313963	0.0371799		0	0.151211	2.15123	0.46485	0.250799		8.77209e-06	0.00045683	0.251028	0.0411648		-0.151211	0	2.15123	0.46485	0.250799		8.77209e-06	0.00045683	0.251028	0.0411648
						-0.363165	0.36332	2.15504	0.464028	0.331432		1.04437e-05	0.000644375	0.331754	0.034745		-0.148839	0.150754	2.1554	0.46395	0.314282		1.10651e-05	0.000637468	0.314601	0.0372113		0	0.150754	2.15119	0.464859	0.251256		8.38747e-06	0.00045683	0.251485	0.03936		-0.150754	0	2.15119	0.464859	0.251256		8.38747e-06	0.00045683	0.251485	0.03936
						-0.363622	0.363774	2.15499	0.464038	0.332077		1.0444e-05	0.000644399	0.332399	0.0347449		-0.148394	0.150297	2.15535	0.463961	0.31492		1.10661e-05	0.000637523	0.315238	0.0372113		0	0.150297	2.15115	0.464868	0.251713		8.38747e-06	0.00045683	0.251942	0.03936		-0.150297	0	2.15115	0.464868	0.251713		8.38747e-06	0.00045683	0.251942	0.03936
						-0.364078	0.364229	2.15495	0.464049	0.332721		1.04444e-05	0.000644423	0.333043	0.0347449		-0.147949	0.14984	2.1553	0.463972	0.315557		1.1067e-05	0.000637577	0.315876	0.0372113		0	0.14984	2.15111	0.464876	0.25217		8.38747e-06	0.00045683	0.252398	0.03936		-0.14984	0	2.15111	0.464876	0.25217		8.38747e-06	0.00045683	0.252398	0.03936
						-0.364535	0.364683	2.1549	0.464059	0.333365		1.04448e-05	0.000644446	0.333688	0.0347448		-0.147505	0.149383	2.15525	0.463984	0.316195		1.10679e-05	0.000637631	0.316514	0.0372113		0	0.149383	2.15107	0.464884	0.252627		8.38747e-06	0.00045683	0.252855	0.03936		-0.149383	0	2.15107	0.464884	0.252627		8.38747e-06	0.00045683	0.252855	0.03936
						-0.364992	0.365138	2.15485	0.46407	0.33401		1.04451e-05	0.00064447	0.334332	0.0347448		-0.14706	0.148926	2.1552	0.463995	0.316832		1.10689e-05	0.000637685	0.317151	0.0372112		0	0.148926	2.15103	0.464893	0.253084		8.38747e-06	0.00045683	0.253312	0.03936		-0.148926	0	2.15103	0.464893	0.253084		8.38747e-06	0.00045683	0.253312	0.03936
						-0.365449	0.365593	2.1548	0.46408	0.334654		1.04455e-05	0.000644493	0.334977	0.0347447		-0.146615	0.14847	2.15515	0.464006	0.31747		1.10698e-05	0.000637738	0.317789	0.0372112		0	0.14847	2.15099	0.464901	0.25354		8.38747e-06	0.00045683	0.253769	0.03936		-0.14847	0	2.15099	0.464901	0.25354		8.38747e-06	0.00045683	0.253769	0.03936
						-0.365906	0.366047	2.15475	0.464091	0.335299		1.04459e-05	0.000644515	0.335621	0.0347447		-0.14617	0.148013	2.15509	0.464017	0.318108		1.10707e-05	0.00063779	0.318427	0.0372113		0	0.148013	2.15096	0.46491	0.253997		8.38747e-06	0.00045683	0.254226	0.03936		-0.148013	0	2.15096	0.46491	0.253997		8.38747e-06	0.00045683	0.254226	0.03936
						-0.366363	0.366502	2.1547	0.464101	0.335943		1.04264e-05	0.000644538	0.336266	0.0346786		-0.145725	0.147556	2.15504	0.464028	0.318746		1.10745e-05	0.000637843	0.319064	0.037221		0	0.147556	2.15092	0.464918	0.254454		8.38747e-06	0.00045683	0.254683	0.03936		-0.147556	0	2.15092	0.464918	0.254454		8.38747e-06	0.00045683	0.254683	0.03936
						-0.366819	0.366956	2.15465	0.464112	0.336588		1.03221e-05	0.000644442	0.33691	0.034337		-0.14528	0.147099	2.15499	0.464039	0.319383		1.10764e-05	0.000637953	0.319702	0.0372209		0	0.147099	2.15088	0.464926	0.254911		8.38747e-06	0.00045683	0.255139	0.03936		-0.147099	0	2.15088	0.464926	0.254911		8.38747e-06	0.00045683	0.255139	0.03936
						-0.367276	0.367411	2.15461	0.464122	0.337232		1.03207e-05	0.000644452	0.337554	0.0343316		-0.144834	0.146642	2.15494	0.46405	0.320021		1.10783e-05	0.000638064	0.32034	0.0372209		0	0.146642	2.15084	0.464935	0.255368		8.38747e-06	0.00045683	0.255596	0.03936		-0.146642	0	2.15084	0.464935	0.255368		8.38747e-06	0.00045683	0.255596	0.03936
						-0.367733	0.367866	2.15456	0.464132	0.337877		1.0321e-05	0.000644477	0.338199	0.0343315		-0.144389	0.146185	2.15489	0.464061	0.320659		1.10802e-05	0.000638173	0.320979	0.0372209		0	0.146185	2.1508	0.464943	0.255825		8.38747e-06	0.00045683	0.256053	0.03936		-0.146185	0	2.1508	0.464943	0.255825		8.38747e-06	0.00045683	0.256053	0.03936
						-0.36819	0.36832	2.15451	0.464143	0.338521		1.03214e-05	0.000644501	0.338843	0.0343315		-0.143943	0.145729	2.15484	0.464072	0.321298		1.10666e-05	0.000638283	0.321617	0.0371688		0	0.145729	2.15076	0.464951	0.256281		8.01785e-06	0.00045683	0.25651	0.0376254		-0.145729	0	2.15076	0.464951	0.256281		8.01785e-06	0.00045683	0.25651	0.0376254
						-0.368647	0.368775	2.15446	0.464153	0.339166		1.03218e-05	0.000644525	0.339488	0.0343314		-0.143498	0.145272	2.15479	0.464083	0.321936		1.10674e-05	0.000638328	0.322255	0.0371688		0	0.145272	2.15073	0.464959	0.256738		8.01785e-06	0.00045683	0.256967	0.0376254		-0.145272	0	2.15073	0.464959	0.256738		8.01785e-06	0.00045683	0.256967	0.0376254
						-0.369104	0.369229	2.15441	0.464163	0.33981		1.03221e-05	0.000644548	0.340132	0.0343314		-0.143052	0.144815	2.15473	0.464094	0.322574		1.10682e-05	0.000638374	0.322893	0.0371688		0	0.144815	2.15069	0.464967	0.257195		8.01785e-06	0.00045683	0.257423	0.0376254		-0.144815	0	2.15069	0.464967	0.257195		8.01785e-06	0.00045683	0.257423	0.0376254
						-0.36956	0.369684	2.15437	0.464173	0.340455		1.03225e-05	0.000644572	0.340777	0.0343313		-0.142606	0.144358	2.15468	0.464105	0.323213		1.10689e-05	0.000638418	0.323532	0.0371688		0	0.144358	2.15065	0.464976	0.257652		8.01785e-06	0.00045683	0.25788	0.0376254		-0.144358	0	2.15065	0.464976	0.257652		8.01785e-06	0.00045683	0.25788	0.0376254
						-0.370017	0.370139	2.15432	0.464184	0.341099		1.03228e-05	0.000644595	0.341422	0.0343313		-0.14216	0.143901	2.15463	0.464116	0.323851		1.10697e-05	0.000638463	0.32417	0.0371687		0	0.143901	2.15061	0.464984	0.258109		8.01785e-06	0.00045683	0.258337	0.0376254		-0.143901	0	2.15061	0.464984	0.258109		8.01785e-06	0.00045683	0.258337	0.0376254
						-0.370474	0.370594	2.15427	0.464194	0.341744		1.03232e-05	0.000644618	0.342066	0.0343312		-0.141714	0.143444	2.15458	0.464127	0.324489		1.10705e-05	0.000638507	0.324809	0.0371687		0	0.143444	2.15058	0.464992	0.258566		8.01785e-06	0.00045683	0.258794	0.0376254		-0.143444	0	2.15058	0.464992	0.258566		8.01785e-06	0.00045683	0.258794	0.0376254
						-0.370931	0.371048	2.15422	0.464204	0.342389		1.03235e-05	0.00064464	0.342711	0.0343312		-0.141268	0.142988	2.15453	0.464139	0.325128		1.10712e-05	0.00063855	0.325447	0.0371687		0	0.142988	2.15054	0.465	0.259022		8.01785e-06	0.00045683	0.259251	0.0376254		-0.142988	0	2.15054	0.465	0.259022		8.01785e-06	0.00045683	0.259251	0.0376254
						-0.371388	0.371503	2.15418	0.464215	0.343033		1.02998e-05	0.000644663	0.343356	0.0342512		-0.140822	0.142531	2.15448	0.46415	0.325767		1.10565e-05	0.000638593	0.326086	0.0371167		0	0.142531	2.1505	0.465008	0.259479		8.01785e-06	0.00045683	0.259708	0.0376254		-0.142531	0	2.1505	0.465008	0.259479		8.01785e-06	0.00045683	0.259708	0.0376254
						-0.371845	0.371958	2.15413	0.464225	0.343678		1.01403e-05	0.000644548	0.344	0.0337265		-0.140375	0.142074	2.15443	0.464161	0.326405		1.10524e-05	0.000638678	0.326724	0.037098		0	0.142074	2.15047	0.465016	0.259936		8.01785e-06	0.00045683	0.260164	0.0376254		-0.142074	0	2.15047	0.465016	0.259936		8.01785e-06	0.00045683	0.260164	0.0376254
						-0.372301	0.372413	2.15408	0.464235	0.344322		1.0138e-05	0.000644553	0.344645	0.0337187		-0.139929	0.141617	2.15438	0.464172	0.327044		1.10541e-05	0.000638777	0.327363	0.037098		0	0.141617	2.15043	0.465024	0.260393		8.01785e-06	0.00045683	0.260621	0.0376254		-0.141617	0	2.15043	0.465024	0.260393		8.01785e-06	0.00045683	0.260621	0.0376254
						-0.372758	0.372868	2.15403	0.464245	0.344967		1.01383e-05	0.000644578	0.345289	0.0337186		-0.139483	0.14116	2.15432	0.464183	0.327683		1.10558e-05	0.000638877	0.328002	0.0370979		0	0.14116	2.15039	0.465032	0.26085		8.01785e-06	0.00045683	0.261078	0.0376254		-0.14116	0	2.15039	0.465032	0.26085		8.01785e-06	0.00045683	0.261078	0.0376254
						-0.373215	0.373322	2.15399	0.464256	0.345612		1.01387e-05	0.000644603	0.345934	0.0337185		-0.139036	0.140704	2.15427	0.464194	0.328321		1.10183e-05	0.000638976	0.328641	0.0369665		0	0.140704	2.15035	0.46504	0.261307		7.66169e-06	0.00045683	0.261535	0.0359541		-0.140704	0	2.15035	0.46504	0.261307		7.66169e-06	0.00045683	0.261535	0.0359541
						-0.373672	0.373777	2.15394	0.464266	0.346256		1.01391e-05	0.000644627	0.346578	0.0337185		-0.138589	0.140247	2.15422	0.464205	0.32896		1.10189e-05	0.000639013	0.32928	0.0369664		0	0.140247	2.15032	0.465047	0.261763		7.66169e-06	0.00045683	0.261992	0.0359541		-0.140247	0	2.15032	0.465047	0.261763		7.66169e-06	0.00045683	0.261992	0.0359541
						-0.374129	0.374232	2.15389	0.464276	0.346901		1.01395e-05	0.000644652	0.347223	0.0337184		-0.138142	0.13979	2.15417	0.464216	0.329599		1.10196e-05	0.000639051	0.329919	0.0369664		0	0.13979	2.15028	0.465055	0.26222		7.66169e-06	0.00045683	0.262449	0.0359541		-0.13979	0	2.15028	0.465055	0.26222		7.66169e-06	0.00045683	0.262449	0.0359541
						-0.374586	0.374687	2.15385	0.464286	0.347545		1.01398e-05	0.000644676	0.347868	0.0337184		-0.137696	0.139333	2.15412	0.464227	0.330238		1.10202e-05	0.000639088	0.330558	0.0369664		0	0.139333	2.15025	0.465063	0.262677		7.66169e-06	0.00045683	0.262905	0.0359541		-0.139333	0	2.15025	0.465063	0.262677		7.66169e-06	0.00045683	0.262905	0.0359541
						-0.375042	0.375142	2.1538	0.464296	0.34819		1.01402e-05	0.0006447	0.348512	0.0337183		-0.137249	0.138876	2.15407	0.464238	0.330878		1.10209e-05	0.000639125	0.331197	0.0369664		0	0.138876	2.15021	0.46507	0.263134		7.66169e-06	0.00045683	0.263362	0.0359541		-0.138876	0	2.15021	0.46507	0.263134		7.66169e-06	0.00045683	0.263362	0.0359541
						-0.375499	0.375596	2.15375	0.464306	0.348835		1.01405e-05	0.000644723	0.349157	0.0337183		-0.136802	0.138419	2.15402	0.464249	0.331517		1.10215e-05	0.000639162	0.331836	0.0369664		0	0.138419	2.15018	0.465078	0.263591		7.66169e-06	0.00045683	0.263819	0.0359541		-0.138419	0	2.15018	0.465078	0.263591		7.66169e-06	0.00045683	0.263819	0.0359541
						-0.375956	0.376051	2.1537	0.464316	0.34948		1.01409e-05	0.000644746	0.349802	0.0337182		-0.136355	0.137963	2.15397	0.46426	0.332156		1.10221e-05	0.000639198	0.332475	0.0369664		0	0.137963	2.15014	0.465086	0.264048		7.66169e-06	0.00045683	0.264276	0.0359541		-0.137963	0	2.15014	0.465086	0.264048		7.66169e-06	0.00045683	0.264276	0.0359541
						-0.376413	0.376506	2.15366	0.464326	0.350124		1.01149e-05	0.00064477	0.350447	0.0336305		-0.135908	0.137506	2.15391	0.464271	0.332795		1.10013e-05	0.000639234	0.333115	0.0368945		0	0.137506	2.15011	0.465093	0.264504		7.66169e-06	0.00045683	0.264733	0.0359541		-0.137506	0	2.15011	0.465093	0.264504		7.66169e-06	0.00045683	0.264733	0.0359541
						-0.37687	0.376961	2.15361	0.464337	0.350769		9.88941e-06	0.00064463	0.351091	0.032888		-0.13546	0.137049	2.15386	0.464282	0.333434		1.09798e-05	0.000639296	0.333754	0.036819		0	0.137049	2.15007	0.465101	0.264961		7.66169e-06	0.00045683	0.26519	0.0359541		-0.137049	0	2.15007	0.465101	0.264961		7.66169e-06	0.00045683	0.26519	0.0359541
						-0.377327	0.377416	2.15356	0.464346	0.351414		9.88623e-06	0.000644627	0.351736	0.0328776		-0.135013	0.136592	2.15381	0.464293	0.334074		1.09814e-05	0.000639387	0.334393	0.0368189		0	0.136592	2.15004	0.465109	0.265418		7.66169e-06	0.00045683	0.265646	0.0359541		-0.136592	0	2.15004	0.465109	0.265418		7.66169e-06	0.00045683	0.265646	0.0359541
						-0.377783	0.377871	2.15352	0.464356	0.352058		9.88663e-06	0.000644654	0.352381	0.0328775		-0.134566	0.136135	2.15376	0.464304	0.334713		1.09829e-05	0.000639477	0.335033	0.0368189		0	0.136135	2.15	0.465116	0.265875		7.66169e-06	0.00045683	0.266103	0.0359541		-0.136135	0	2.15	0.465116	0.265875		7.66169e-06	0.00045683	0.266103	0.0359541
						-0.37824	0.378326	2.15347	0.464366	0.352703		9.88702e-06	0.000644681	0.353025	0.0328774		-0.134118	0.135678	2.15371	0.464315	0.335352		1.09229e-05	0.000639567	0.335672	0.0366124		0	0.135678	2.14996	0.465124	0.266332		7.31759e-06	0.00045683	0.26656	0.0343393		-0.135678	0	2.14996	0.465124	0.266332		7.31759e-06	0.00045683	0.26656	0.0343393
						-0.378697	0.378781	2.15343	0.464376	0.353348		9.88741e-06	0.000644708	0.35367	0.0328774		-0.133671	0.135222	2.15366	0.464326	0.335992		1.09234e-05	0.000639599	0.336312	0.0366124		0	0.135222	2.14993	0.465131	0.266788		7.31759e-06	0.00045683	0.267017	0.0343393		-0.135222	0	2.14993	0.465131	0.266788		7.31759e-06	0.00045683	0.267017	0.0343393
						-0.379154	0.379236	2.15338	0.464386	0.353992		9.8878e-06	0.000644735	0.354315	0.0328773		-0.133223	0.134765	2.15361	0.464337	0.336632		1.09239e-05	0.00063963	0.336951	0.0366124		0	0.134765	2.1499	0.465139	0.267245		7.31759e-06	0.00045683	0.267474	0.0343393		-0.134765	0	2.1499	0.465139	0.267245		7.31759e-06	0.00045683	0.267474	0.0343393
						-0.379611	0.379691	2.15334	0.464396	0.354637		9.88818e-06	0.000644761	0.354959	0.0328772		-0.132775	0.134308	2.15356	0.464348	0.337271		1.09245e-05	0.000639661	0.337591	0.0366124		0	0.134308	2.14986	0.465146	0.267702		7.31759e-06	0.00045683	0.267931	0.0343393		-0.134308	0	2.14986	0.465146	0.267702		7.31759e-06	0.00045683	0.267931	0.0343393
						-0.380068	0.380146	2.15329	0.464406	0.355282		9.88856e-06	0.000644787	0.355604	0.0328772		-0.132328	0.133851	2.15351	0.464359	0.337911		1.0925e-05	0.000639692	0.338231	0.0366124		0	0.133851	2.14983	0.465153	0.268159		7.31759e-06	0.00045683	0.268387	0.0343393		-0.133851	0	2.14983	0.465153	0.268159		7.31759e-06	0.00045683	0.268387	0.0343393
						-0.380524	0.380601	2.15324	0.464416	0.355927		9.88893e-06	0.000644813	0.356249	0.0328771		-0.13188	0.133394	2.15346	0.46437	0.338551		1.09255e-05	0.000639722	0.33887	0.0366124		0	0.133394	2.1498	0.465161	0.268616		7.31759e-06	0.00045683	0.268844	0.0343393		-0.133394	0	2.1498	0.465161	0.268616		7.31759e-06	0.00045683	0.268844	0.0343393
						-0.380981	0.381056	2.1532	0.464426	0.356571		9.8893e-06	0.000644838	0.356894	0.032877		-0.131432	0.132937	2.15341	0.46438	0.33919		1.0926e-05	0.000639753	0.33951	0.0366124		0	0.132937	2.14976	0.465168	0.269073		7.31759e-06	0.00045683	0.269301	0.0343393		-0.132937	0	2.14976	0.465168	0.269073		7.31759e-06	0.00045683	0.269301	0.0343393
						-0.381438	0.381511	2.15315	0.464435	0.357216		9.86257e-06	0.000644863	0.357539	0.0327869		-0.130984	0.132481	2.15336	0.464391	0.33983		1.09094e-05	0.000639783	0.34015	0.0365549		0	0.132481	2.14973	0.465175	0.269529		7.31759e-06	0.00045683	0.269758	0.0343393		-0.132481	0	2.14973	0.465175	0.269529		7.31759e-06	0.00045683	0.269758	0.0343393
						-0.381895	0.381966	2.15311	0.464445	0.357861		9.54991e-06	0.000644691	0.358183	0.031756		-0.130536	0.132024	2.15331	0.464402	0.34047		1.08616e-05	0.000639826	0.34079	0.0363924		0	0.132024	2.14969	0.465182	0.269986		7.31759e-06	0.00045683	0.270215	0.0343393		-0.132024	0	2.14969	0.465182	0.269986		7.31759e-06	0.00045683	0.270215	0.0343393
						-0.382352	0.382421	2.15306	0.464455	0.358506		9.54568e-06	0.00064467	0.358828	0.0317429		-0.130088	0.131567	2.15326	0.464413	0.34111		1.0863e-05	0.000639909	0.34143	0.0363923		0	0.131567	2.14966	0.46519	0.270443		7.31759e-06	0.00045683	0.270672	0.0343393		-0.131567	0	2.14966	0.46519	0.270443		7.31759e-06	0.00045683	0.270672	0.0343393
						-0.382809	0.382876	2.15302	0.464464	0.35915		9.54612e-06	0.000644703	0.359473	0.0317428		-0.12964	0.13111	2.1532	0.464424	0.34175		1.08644e-05	0.000639992	0.34207	0.0363923		0	0.13111	2.14963	0.465197	0.2709		7.31759e-06	0.00045683	0.271128	0.0343393		-0.13111	0	2.14963	0.465197	0.2709		7.31759e-06	0.00045683	0.271128	0.0343393
						-0.383265	0.383331	2.15297	0.464474	0.359795		9.54656e-06	0.000644734	0.360118	0.0317427		-0.129192	0.130653	2.15315	0.464435	0.34239		1.07831e-05	0.000640074	0.34271	0.0361154		0	0.130653	2.14959	0.465204	0.271357		6.9843e-06	0.00045683	0.271585	0.0327753		-0.130653	0	2.14959	0.465204	0.271357		6.9843e-06	0.00045683	0.271585	0.0327753
						-0.383722	0.383786	2.15293	0.464484	0.36044		9.547e-06	0.000644766	0.360762	0.0317426		-0.128744	0.130196	2.1531	0.464446	0.34303		1.07836e-05	0.0006401	0.34335	0.0361154		0	0.130196	2.14956	0.465211	0.271814		6.9843e-06	0.00045683	0.272042	0.0327753		-0.130196	0	2.14956	0.465211	0.271814		6.9843e-06	0.00045683	0.272042	0.0327753
						-0.384179	0.384241	2.15288	0.464493	0.361085		9.54743e-06	0.000644797	0.361407	0.0317425		-0.128295	0.12974	2.15305	0.464456	0.34367		1.0784e-05	0.000640127	0.34399	0.0361154		0	0.12974	2.14953	0.465218	0.27227		6.9843e-06	0.00045683	0.272499	0.0327753		-0.12974	0	2.14953	0.465218	0.27227		6.9843e-06	0.00045683	0.272499	0.0327753
						-0.384636	0.384696	2.15284	0.464503	0.361729		9.54786e-06	0.000644828	0.362052	0.0317424		-0.127847	0.129283	2.153	0.464467	0.34431		1.07845e-05	0.000640153	0.34463	0.0361154		0	0.129283	2.1495	0.465225	0.272727		6.9843e-06	0.00045683	0.272956	0.0327753		-0.129283	0	2.1495	0.465225	0.272727		6.9843e-06	0.00045683	0.272956	0.0327753
						-0.385093	0.385151	2.1528	0.464512	0.362374		9.54829e-06	0.000644859	0.362697	0.0317423		-0.127398	0.128826	2.15295	0.464478	0.34495		1.07849e-05	0.000640179	0.34527	0.0361154		0	0.128826	2.14946	0.465232	0.273184		6.9843e-06	0.00045683	0.273413	0.0327753		-0.128826	0	2.14946	0.465232	0.273184		6.9843e-06	0.00045683	0.273413	0.0327753
						-0.385549	0.385606	2.15275	0.464522	0.363019		9.54871e-06	0.000644889	0.363342	0.0317422		-0.12695	0.128369	2.1529	0.464489	0.34559		1.07853e-05	0.000640204	0.34591	0.0361154		0	0.128369	2.14943	0.465239	0.273641		6.9843e-06	0.00045683	0.273869	0.0327753		-0.128369	0	2.14943	0.465239	0.273641		6.9843e-06	0.00045683	0.273869	0.0327753
						-0.386006	0.386061	2.15271	0.464531	0.363664		9.54912e-06	0.000644919	0.363987	0.0317421		-0.126501	0.127912	2.15285	0.4645	0.34623		1.07858e-05	0.00064023	0.346551	0.0361154		0	0.127912	2.1494	0.465246	0.274098		6.9843e-06	0.00045683	0.274326	0.0327753		-0.127912	0	2.1494	0.465246	0.274098		6.9843e-06	0.00045683	0.274326	0.0327753
						-0.386463	0.386516	2.15266	0.464541	0.364309		9.52327e-06	0.000644948	0.364631	0.0316547		-0.126053	0.127455	2.1528	0.46451	0.346871		1.07816e-05	0.000640255	0.347191	0.0361001		0	0.127455	2.14937	0.465253	0.274555		6.9843e-06	0.00045683	0.274783	0.0327753		-0.127455	0	2.14937	0.465253	0.274555		6.9843e-06	0.00045683	0.274783	0.0327753
						-0.38692	0.386972	2.15262	0.46455	0.364954		9.07293e-06	0.000644725	0.365276	0.0301683		-0.125604	0.126999	2.15275	0.464521	0.347511		1.07006e-05	0.000640283	0.347831	0.0358272		0	0.126999	2.14933	0.46526	0.275011		6.9843e-06	0.00045683	0.27524	0.0327753		-0.126999	0	2.14933	0.46526	0.275011		6.9843e-06	0.00045683	0.27524	0.0327753
						-0.387377	0.387427	2.15258	0.464559	0.365599		9.06715e-06	0.000644664	0.365921	0.0301519		-0.125156	0.126542	2.1527	0.464532	0.348151		1.07018e-05	0.000640359	0.348471	0.0358272		0	0.126542	2.1493	0.465267	0.275468		6.9843e-06	0.00045683	0.275697	0.0327753		-0.126542	0	2.1493	0.465267	0.275468		6.9843e-06	0.00045683	0.275697	0.0327753
						-0.387834	0.387881	2.15254	0.464568	0.366243		9.0677e-06	0.000644707	0.366566	0.0301518		-0.124707	0.126085	2.15266	0.464543	0.348792		1.07031e-05	0.000640434	0.349112	0.0358271		0	0.126085	2.14927	0.465274	0.275925		6.9843e-06	0.00045683	0.276153	0.0327753		-0.126085	0	2.14927	0.465274	0.275925		6.9843e-06	0.00045683	0.276153	0.0327753
						-0.38829	0.388336	2.15249	0.464578	0.366888		9.06825e-06	0.000644749	0.36721	0.0301516		-0.124258	0.125628	2.15261	0.464553	0.349432		1.0602e-05	0.00064051	0.349752	0.0354846		0	0.125628	2.14924	0.465281	0.276382		6.66066e-06	0.00045683	0.27661	0.0312565		-0.125628	0	2.14924	0.465281	0.276382		6.66066e-06	0.00045683	0.27661	0.0312565
						-0.388747	0.388791	2.15245	0.464587	0.367533		9.06879e-06	0.000644791	0.367855	0.0301514		-0.123809	0.125171	2.15256	0.464564	0.350072		1.06024e-05	0.000640532	0.350393	0.0354846		0	0.125171	2.14921	0.465288	0.276839		6.66066e-06	0.00045683	0.277067	0.0312565		-0.125171	0	2.14921	0.465288	0.276839		6.66066e-06	0.00045683	0.277067	0.0312565
						-0.389204	0.389246	2.15241	0.464596	0.368178		9.06933e-06	0.000644833	0.3685	0.0301513		-0.12336	0.124714	2.15251	0.464574	0.350713		1.06027e-05	0.000640554	0.351033	0.0354846		0	0.124714	2.14918	0.465295	0.277296		6.66066e-06	0.00045683	0.277524	0.0312565		-0.124714	0	2.14918	0.465295	0.277296		6.66066e-06	0.00045683	0.277524	0.0312565
						-0.389661	0.389701	2.15237	0.464605	0.368822		9.06986e-06	0.000644874	0.369145	0.0301511		-0.122911	0.124258	2.15246	0.464585	0.351354		1.06031e-05	0.000640576	0.351674	0.0354846		0	0.124258	2.14915	0.465301	0.277752		6.66066e-06	0.00045683	0.277981	0.0312565		-0.124258	0	2.14915	0.465301	0.277752		6.66066e-06	0.00045683	0.277981	0.0312565
						-0.390118	0.390157	2.15233	0.464614	0.369467		9.07038e-06	0.000644915	0.36979	0.0301509		-0.122462	0.123801	2.15241	0.464596	0.351994		1.06035e-05	0.000640598	0.352314	0.0354846		0	0.123801	2.14911	0.465308	0.278209		6.66066e-06	0.00045683	0.278438	0.0312565		-0.123801	0	2.14911	0.465308	0.278209		6.66066e-06	0.00045683	0.278438	0.0312565
						-0.390575	0.390612	2.15228	0.464623	0.370112		9.07089e-06	0.000644955	0.370435	0.0301508		-0.122013	0.123344	2.15236	0.464606	0.352635		1.06038e-05	0.00064062	0.352955	0.0354846		0	0.123344	2.14908	0.465315	0.278666		6.66066e-06	0.00045683	0.278894	0.0312565		-0.123344	0	2.14908	0.465315	0.278666		6.66066e-06	0.00045683	0.278894	0.0312565
						-0.391031	0.391067	2.15224	0.464632	0.370757		9.0714e-06	0.000644994	0.37108	0.0301506		-0.121564	0.122887	2.15231	0.464617	0.353275		1.06042e-05	0.000640641	0.353596	0.0354846		0	0.122887	2.14905	0.465321	0.279123		6.66066e-06	0.00045683	0.279351	0.0312565		-0.122887	0	2.14905	0.465321	0.279123		6.66066e-06	0.00045683	0.279351	0.0312565
						-0.391488	0.391522	2.1522	0.464641	0.371402		9.04969e-06	0.000645033	0.371725	0.0300766		-0.121115	0.12243	2.15226	0.464627	0.353916		1.06045e-05	0.000640663	0.354236	0.0354846		0	0.12243	2.14902	0.465328	0.27958		6.66066e-06	0.00045683	0.279808	0.0312565		-0.12243	0	2.14902	0.465328	0.27958		6.66066e-06	0.00045683	0.279808	0.0312565
						-0.391945	0.391978	2.15216	0.46465	0.372047		8.30633e-06	0.000644706	0.37237	0.0276201		-0.120666	0.121974	2.15221	0.464638	0.354557		1.05144e-05	0.000640684	0.354877	0.0351817		0	0.121974	2.14899	0.465335	0.280037		6.66066e-06	0.00045683	0.280265	0.0312565		-0.121974	0	2.14899	0.465335	0.280037		6.66066e-06	0.00045683	0.280265	0.0312565
						-0.392402	0.392433	2.15212	0.464658	0.372692		8.29697e-06	0.000644465	0.373014	0.0275993		-0.120216	0.121517	2.15216	0.464649	0.355197		1.05007e-05	0.000640747	0.355518	0.0351327		0	0.121517	2.14896	0.465341	0.280493		6.66066e-06	0.00045683	0.280722	0.0312565		-0.121517	0	2.14896	0.465341	0.280493		6.66066e-06	0.00045683	0.280722	0.0312565
						-0.392859	0.392887	2.15208	0.464667	0.373336		8.29784e-06	0.000644543	0.373659	0.0275988		-0.119767	0.12106	2.15212	0.464659	0.355838		1.05019e-05	0.000640817	0.356159	0.0351326		0	0.12106	2.14893	0.465348	0.28095		6.66066e-06	0.00045683	0.281179	0.0312565		-0.12106	0	2.14893	0.465348	0.28095		6.66066e-06	0.00045683	0.281179	0.0312565
						-0.393316	0.393342	2.15204	0.464675	0.373981		8.29871e-06	0.000644622	0.374303	0.0275984		-0.119318	0.120603	2.15207	0.46467	0.356479		1.03824e-05	0.000640886	0.356799	0.0347292		0	0.120603	2.1489	0.465355	0.281407		6.34566e-06	0.00045683	0.281635	0.0297783		-0.120603	0	2.1489	0.465355	0.281407		6.34566e-06	0.00045683	0.281635	0.0297783
						-0.393772	0.393797	2.152	0.464683	0.374625		8.29958e-06	0.0006447	0.374948	0.0275979		-0.118868	0.120146	2.15202	0.46468	0.35712		1.03827e-05	0.000640905	0.35744	0.0347292		0	0.120146	2.14887	0.465361	0.281864		6.34566e-06	0.00045683	0.282092	0.0297783		-0.120146	0	2.14887	0.465361	0.281864		6.34566e-06	0.00045683	0.282092	0.0297783
						-0.394229	0.394252	2.15196	0.464692	0.37527		8.30044e-06	0.000644778	0.375593	0.0275974		-0.118419	0.119689	2.15197	0.46469	0.357761		1.0383e-05	0.000640924	0.358081	0.0347292		0	0.119689	2.14884	0.465367	0.282321		6.34566e-06	0.00045683	0.282549	0.0297783		-0.119689	0	2.14884	0.465367	0.282321		6.34566e-06	0.00045683	0.282549	0.0297783
						-0.394686	0.394707	2.15193	0.4647	0.375915		8.30129e-06	0.000644854	0.376237	0.027597		-0.117969	0.119233	2.15192	0.464701	0.358402		1.03833e-05	0.000640942	0.358722	0.0347292		0	0.119233	2.14881	0.465374	0.282778		6.34566e-06	0.00045683	0.283006	0.0297783		-0.119233	0	2.14881	0.465374	0.282778		6.34566e-06	0.00045683	0.283006	0.0297783
						-0.395143	0.395162	2.15189	0.464708	0.37656		8.30213e-06	0.00064493	0.376882	0.0275965		-0.11752	0.118776	2.15187	0.464711	0.359043		1.03836e-05	0.000640961	0.359363	0.0347292		0	0.118776	2.14878	0.46538	0.283234		6.34566e-06	0.00045683	0.283463	0.0297783		-0.118776	0	2.14878	0.46538	0.283234		6.34566e-06	0.00045683	0.283463	0.0297783
						-0.3956	0.395617	2.15185	0.464716	0.377205		8.30295e-06	0.000645004	0.377527	0.0275961		-0.11707	0.118319	2.15183	0.464722	0.359684		1.03839e-05	0.000640979	0.360004	0.0347292		0	0.118319	2.14875	0.465386	0.283691		6.34566e-06	0.00045683	0.28392	0.0297783		-0.118319	0	2.14875	0.465386	0.283691		6.34566e-06	0.00045683	0.28392	0.0297783
						-0.396057	0.396072	2.15181	0.464725	0.37785		8.30375e-06	0.000645076	0.378172	0.0275957		-0.11662	0.117862	2.15178	0.464732	0.360325		1.03842e-05	0.000640997	0.360645	0.0347292		0	0.117862	2.14872	0.465393	0.284148		6.34566e-06	0.00045683	0.284376	0.0297783		-0.117862	0	2.14872	0.465393	0.284148		6.34566e-06	0.00045683	0.284376	0.0297783
						-0.396513	0.396528	2.15177	0.464733	0.378495		8.30453e-06	0.000645146	0.378817	0.0275953		-0.116171	0.117405	2.15173	0.464742	0.360966		1.03845e-05	0.000641015	0.361286	0.0347292		0	0.117405	2.14869	0.465399	0.284605		6.34566e-06	0.00045683	0.284833	0.0297783		-0.117405	0	2.14869	0.465399	0.284605		6.34566e-06	0.00045683	0.284833	0.0297783
						-0.39697	0.396983	2.15173	0.464741	0.37914		6.38692e-06	0.000645213	0.379463	0.021221		-0.115721	0.116948	2.15168	0.464753	0.361607		1.0301e-05	0.000641033	0.361927	0.0344491		0	0.116948	2.14866	0.465405	0.285062		6.34566e-06	0.00045683	0.28529	0.0297783		-0.116948	0	2.14866	0.465405	0.285062		6.34566e-06	0.00045683	0.28529	0.0297783
						-0.397427	0.397439	2.1517	0.464748	0.379785		6.3673e-06	0.000644774	0.380108	0.0211702		-0.115271	0.116492	2.15163	0.464763	0.362248		1.02627e-05	0.000641083	0.362568	0.0343183		0	0.116492	2.14864	0.465412	0.285519		6.34566e-06	0.00045683	0.285747	0.0297783		-0.116492	0	2.14864	0.465412	0.285519		6.34566e-06	0.00045683	0.285747	0.0297783
						-0.397884	0.397894	2.15168	0.464754	0.38043		6.36812e-06	0.000644905	0.380752	0.0211686		-0.114822	0.116035	2.15159	0.464773	0.362889		1.02637e-05	0.000641147	0.363209	0.0343183		0	0.116035	2.14861	0.465418	0.285975		6.34566e-06	0.00045683	0.286204	0.0297783		-0.116035	0	2.14861	0.465418	0.285975		6.34566e-06	0.00045683	0.286204	0.0297783
						-0.398341	0.398349	2.15165	0.464761	0.381075		6.36882e-06	0.000645018	0.381397	0.0211673		-0.114372	0.115578	2.15154	0.464784	0.36353		1.01274e-05	0.000641212	0.36385	0.0338588		0	0.115578	2.14858	0.465424	0.286432		6.03833e-06	0.00045683	0.286661	0.0283361		-0.115578	0	2.14858	0.465424	0.286432		6.03833e-06	0.00045683	0.286661	0.0283361
						-0.398798	0.398805	2.15162	0.464767	0.38172		6.36943e-06	0.000645116	0.382042	0.0211661		-0.113922	0.115121	2.15149	0.464794	0.364171		1.01276e-05	0.000641228	0.364492	0.0338588		0	0.115121	2.14855	0.46543	0.286889		6.03833e-06	0.00045683	0.287117	0.0283361		-0.115121	0	2.14855	0.46543	0.286889		6.03833e-06	0.00045683	0.287117	0.0283361
						-0.399254	0.39926	2.15159	0.464773	0.382365		6.36997e-06	0.000645202	0.382688	0.021165		-0.113472	0.114664	2.15145	0.464804	0.364812		1.01279e-05	0.000641243	0.365133	0.0338588		0	0.114664	2.14852	0.465436	0.287346		6.03833e-06	0.00045683	0.287574	0.0283361		-0.114664	0	2.14852	0.465436	0.287346		6.03833e-06	0.00045683	0.287574	0.0283361
						-0.399711	0.399716	2.15156	0.46478	0.38301		6.37044e-06	0.000645278	0.383333	0.0211641		-0.113022	0.114207	2.1514	0.464814	0.365453		1.01281e-05	0.000641259	0.365774	0.0338588		0	0.114207	2.14849	0.465442	0.287803		6.03833e-06	0.00045683	0.288031	0.0283361		-0.114207	0	2.14849	0.465442	0.287803		6.03833e-06	0.00045683	0.288031	0.0283361
						-0.400168	0.400172	2.15153	0.464786	0.383655		6.37087e-06	0.000645347	0.383978	0.0211633		-0.112572	0.113751	2.15135	0.464824	0.366095		1.01283e-05	0.000641275	0.366415	0.0338588		0	0.113751	2.14847	0.465448	0.288259		6.03833e-06	0.00045683	0.288488	0.0283361		-0.113751	0	2.14847	0.465448	0.288259		6.03833e-06	0.00045683	0.288488	0.0283361
						-0.400625	0.400627	2.1515	0.464792	0.384301		6.37125e-06	0.000645409	0.384624	0.0211625		-0.112122	0.113294	2.1513	0.464834	0.366736		1.01286e-05	0.00064129	0.367057	0.0338588		0	0.113294	2.14844	0.465455	0.288716		6.03833e-06	0.00045683	0.288945	0.0283361		-0.113294	0	2.14844	0.465455	0.288716		6.03833e-06	0.00045683	0.288945	0.0283361
						-0.401082	0.401083	2.15147	0.464799	0.384946		6.37161e-06	0.000645467	0.385269	0.0211618		-0.111672	0.112837	2.15126	0.464844	0.367377		1.01288e-05	0.000641306	0.367698	0.0338588		0	0.112837	2.14841	0.465461	0.289173		6.03833e-06	0.00045683	0.289402	0.0283361		-0.112837	0	2.14841	0.465461	0.289173		6.03833e-06	0.00045683	0.289402	0.0283361
						-0.401539	0.401539	2.15144	0.464805	0.385592		6.37198e-06	0.000645528	0.385914	0.021161		-0.111222	0.11238	2.15121	0.464854	0.368019		1.01291e-05	0.000641321	0.368339	0.0338588		0	0.11238	2.14838	0.465467	0.28963		6.03833e-06	0.00045683	0.289858	0.0283361		-0.11238	0	2.14838	0.465467	0.28963		6.03833e-06	0.00045683	0.289858	0.0283361
						-0.401995	0.401995	2.15141	0.464811	0.386237		2.05182e-07	0.000645992	0.38656	0.00068091		-0.110771	0.111923	2.15116	0.464865	0.36866		1.00578e-05	0.000641337	0.368981	0.0336196		0	0.111923	2.14835	0.465473	0.290087		6.03833e-06	0.00045683	0.290315	0.0283361		-0.111923	0	2.14835	0.465473	0.290087		6.03833e-06	0.00045683	0.290315	0.0283361
						-0.402452	0.402452	2.15141	0.464812	0.386883		0	0.0006252	0.387196	0		-0.110321	0.111466	2.15112	0.464875	0.369301		9.99074e-06	0.000641375	0.369622	0.0333936		0	0.111466	2.14833	0.465479	0.290544		6.03833e-06	0.00045683	0.290772	0.0283361		-0.111466	0	2.14833	0.465479	0.290544		6.03833e-06	0.00045683	0.290772	0.0283361
						-0.40201	0.40201	2.15141	0.464812	0.387508							-0.109871	0.11101	2.15107	0.464885	0.369943		9.99166e-06	0.000641434	0.370263	0.0333936		0	0.11101	2.1483	0.465485	0.291		6.03833e-06	0.00045683	0.291229	0.0283361		-0.11101	0	2.1483	0.465485	0.291		6.03833e-06	0.00045683	0.291229	0.0283361
																	-0.109421	0.110553	2.15103	0.464895	0.370584		9.83977e-06	0.000641494	0.370905	0.0328829		0	0.110553	2.14827	0.465491	0.291457		5.73784e-06	0.00045683	0.291686	0.026926		-0.110553	0	2.14827	0.465491	0.291457		5.73784e-06	0.00045683	0.291686	0.026926
																	-0.10897	0.110096	2.15098	0.464904	0.371226		9.83998e-06	0.000641507	0.371546	0.0328829		0	0.110096	2.14824	0.465496	0.291914		5.73784e-06	0.00045683	0.292143	0.026926		-0.110096	0	2.14824	0.465496	0.291914		5.73784e-06	0.00045683	0.292143	0.026926
																	-0.10852	0.109639	2.15093	0.464914	0.371867		9.84019e-06	0.000641521	0.372188	0.0328829		0	0.109639	2.14822	0.465502	0.292371		5.73784e-06	0.00045683	0.292599	0.026926		-0.109639	0	2.14822	0.465502	0.292371		5.73784e-06	0.00045683	0.292599	0.026926
																	-0.10807	0.109182	2.15089	0.464924	0.372509		9.84039e-06	0.000641534	0.372829	0.0328829		0	0.109182	2.14819	0.465508	0.292828		5.73784e-06	0.00045683	0.293056	0.026926		-0.109182	0	2.14819	0.465508	0.292828		5.73784e-06	0.00045683	0.293056	0.026926
																	-0.107619	0.108725	2.15084	0.464934	0.37315		9.8406e-06	0.000641547	0.373471	0.0328829		0	0.108725	2.14816	0.465514	0.293285		5.73784e-06	0.00045683	0.293513	0.026926		-0.108725	0	2.14816	0.465514	0.293285		5.73784e-06	0.00045683	0.293513	0.026926
																	-0.107169	0.108269	2.1508	0.464944	0.373792		9.8408e-06	0.000641561	0.374112	0.0328829		0	0.108269	2.14814	0.465519	0.293741		5.73784e-06	0.00045683	0.29397	0.026926		-0.108269	0	2.14814	0.465519	0.293741		5.73784e-06	0.00045683	0.29397	0.026926
																	-0.106718	0.107812	2.15075	0.464954	0.374433		9.841e-06	0.000641574	0.374754	0.0328829		0	0.107812	2.14811	0.465525	0.294198		5.73784e-06	0.00045683	0.294427	0.026926		-0.107812	0	2.14811	0.465525	0.294198		5.73784e-06	0.00045683	0.294427	0.026926
																	-0.106268	0.107355	2.15071	0.464963	0.375075		9.8412e-06	0.000641587	0.375396	0.0328829		0	0.107355	2.14809	0.465531	0.294655		5.73784e-06	0.00045683	0.294884	0.026926		-0.107355	0	2.14809	0.465531	0.294655		5.73784e-06	0.00045683	0.294884	0.026926
																	-0.105817	0.106898	2.15066	0.464973	0.375716		9.78643e-06	0.0006416	0.376037	0.0326992		0	0.106898	2.14806	0.465537	0.295112		5.73784e-06	0.00045683	0.29534	0.026926		-0.106898	0	2.14806	0.465537	0.295112		5.73784e-06	0.00045683	0.29534	0.026926
																	-0.105367	0.106441	2.15062	0.464983	0.376358		9.68774e-06	0.000641628	0.376679	0.0323681		0	0.106441	2.14803	0.465542	0.295569		5.73784e-06	0.00045683	0.295797	0.026926		-0.106441	0	2.14803	0.465542	0.295569		5.73784e-06	0.00045683	0.295797	0.026926
																	-0.104916	0.105984	2.15057	0.464993	0.377		9.68856e-06	0.000641683	0.37732	0.032368		0	0.105984	2.14801	0.465548	0.296026		5.73784e-06	0.00045683	0.296254	0.026926		-0.105984	0	2.14801	0.465548	0.296026		5.73784e-06	0.00045683	0.296254	0.026926
																	-0.104466	0.105528	2.15053	0.465002	0.377641		9.52258e-06	0.000641738	0.377962	0.0318108		0	0.105528	2.14798	0.465554	0.296482		5.44342e-06	0.00045683	0.296711	0.0255444		-0.105528	0	2.14798	0.465554	0.296482		5.44342e-06	0.00045683	0.296711	0.0255444
																	-0.104015	0.105071	2.15048	0.465012	0.378283		9.52276e-06	0.00064175	0.378604	0.0318108		0	0.105071	2.14795	0.465559	0.296939		5.44342e-06	0.00045683	0.297168	0.0255444		-0.105071	0	2.14795	0.465559	0.296939		5.44342e-06	0.00045683	0.297168	0.0255444
																	-0.103564	0.104614	2.15044	0.465022	0.378925		9.52293e-06	0.000641762	0.379246	0.0318108		0	0.104614	2.14793	0.465565	0.297396		5.44342e-06	0.00045683	0.297624	0.0255444		-0.104614	0	2.14793	0.465565	0.297396		5.44342e-06	0.00045683	0.297624	0.0255444
																	-0.103114	0.104157	2.15039	0.465031	0.379567		9.5231e-06	0.000641773	0.379887	0.0318108		0	0.104157	2.1479	0.46557	0.297853		5.44342e-06	0.00045683	0.298081	0.0255444		-0.104157	0	2.1479	0.46557	0.297853		5.44342e-06	0.00045683	0.298081	0.0255444
																	-0.102663	0.1037	2.15035	0.465041	0.380208		9.52326e-06	0.000641784	0.380529	0.0318108		0	0.1037	2.14788	0.465576	0.29831		5.44342e-06	0.00045683	0.298538	0.0255444		-0.1037	0	2.14788	0.465576	0.29831		5.44342e-06	0.00045683	0.298538	0.0255444
																	-0.102212	0.103243	2.15031	0.46505	0.38085		9.52343e-06	0.000641796	0.381171	0.0318108		0	0.103243	2.14785	0.465581	0.298767		5.44342e-06	0.00045683	0.298995	0.0255444		-0.103243	0	2.14785	0.465581	0.298767		5.44342e-06	0.00045683	0.298995	0.0255444
																	-0.101761	0.102787	2.15026	0.46506	0.381492		9.5236e-06	0.000641807	0.381813	0.0318108		0	0.102787	2.14783	0.465587	0.299223		5.44342e-06	0.00045683	0.299452	0.0255444		-0.102787	0	2.14783	0.465587	0.299223		5.44342e-06	0.00045683	0.299452	0.0255444
																	-0.10131	0.10233	2.15022	0.465069	0.382134		9.52377e-06	0.000641818	0.382455	0.0318108		0	0.10233	2.1478	0.465592	0.29968		5.44342e-06	0.00045683	0.299909	0.0255444		-0.10233	0	2.1478	0.465592	0.29968		5.44342e-06	0.00045683	0.299909	0.0255444
																	-0.10086	0.101873	2.15017	0.465079	0.382776		9.48909e-06	0.000641829	0.383096	0.0316944		0	0.101873	2.14778	0.465597	0.300137		5.44342e-06	0.00045683	0.300365	0.0255444		-0.101873	0	2.14778	0.465597	0.300137		5.44342e-06	0.00045683	0.300365	0.0255444
																	-0.100409	0.101416	2.15013	0.465088	0.383417		9.35657e-06	0.000641849	0.383738	0.0312508		0	0.101416	2.14775	0.465603	0.300594		5.44342e-06	0.00045683	0.300822	0.0255444		-0.101416	0	2.14775	0.465603	0.300594		5.44342e-06	0.00045683	0.300822	0.0255444
																	-0.0999579	0.100959	2.15009	0.465097	0.384059		9.35731e-06	0.0006419	0.38438	0.0312508		0	0.100959	2.14773	0.465608	0.301051		5.44342e-06	0.00045683	0.301279	0.0255444		-0.100959	0	2.14773	0.465608	0.301051		5.44342e-06	0.00045683	0.301279	0.0255444
																	-0.099507	0.100503	2.15004	0.465107	0.384701		9.1786e-06	0.000641951	0.385022	0.0306515		0	0.100503	2.1477	0.465614	0.301508		5.15437e-06	0.00045683	0.301736	0.0241879		-0.100503	0	2.1477	0.465614	0.301508		5.15437e-06	0.00045683	0.301736	0.0241879
																	-0.099056	0.100046	2.15	0.465116	0.385343		9.17875e-06	0.000641961	0.385664	0.0306515		0	0.100046	2.14768	0.465619	0.301964		5.15437e-06	0.00045683	0.302193	0.0241879		-0.100046	0	2.14768	0.465619	0.301964		5.15437e-06	0.00045683	0.302193	0.0241879
																	-0.098605	0.0995889	2.14996	0.465125	0.385985		9.17889e-06	0.000641971	0.386306	0.0306515		0	0.0995889	2.14766	0.465624	0.302421		5.15437e-06	0.00045683	0.30265	0.0241879		-0.0995889	0	2.14766	0.465624	0.302421		5.15437e-06	0.00045683	0.30265	0.0241879
																	-0.0981539	0.099132	2.14992	0.465134	0.386627		9.17903e-06	0.000641981	0.386948	0.0306515		0	0.099132	2.14763	0.465629	0.302878		5.15437e-06	0.00045683	0.303106	0.0241879		-0.099132	0	2.14763	0.465629	0.302878		5.15437e-06	0.00045683	0.303106	0.0241879
																	-0.0977029	0.0986752	2.14987	0.465144	0.387269		9.17917e-06	0.000641991	0.38759	0.0306515		0	0.0986752	2.14761	0.465634	0.303335		5.15437e-06	0.00045683	0.303563	0.0241879		-0.0986752	0	2.14761	0.465634	0.303335		5.15437e-06	0.00045683	0.303563	0.0241879
																	-0.0972518	0.0982184	2.14983	0.465153	0.387911		9.17931e-06	0.000642	0.388232	0.0306515		0	0.0982184	2.14758	0.46564	0.303792		5.15437e-06	0.00045683	0.30402	0.0241879		-0.0982184	0	2.14758	0.46564	0.303792		5.15437e-06	0.00045683	0.30402	0.0241879
																	-0.0968008	0.0977615	2.14979	0.465162	0.388553		9.17944e-06	0.00064201	0.388874	0.0306515		0	0.0977615	2.14756	0.465645	0.304249		5.15437e-06	0.00045683	0.304477	0.0241879		-0.0977615	0	2.14756	0.465645	0.304249		5.15437e-06	0.00045683	0.304477	0.0241879
																	-0.0963497	0.0973047	2.14975	0.465171	0.389195		9.17958e-06	0.000642019	0.389516	0.0306515		0	0.0973047	2.14754	0.46565	0.304705		5.15437e-06	0.00045683	0.304934	0.0241879		-0.0973047	0	2.14754	0.46565	0.304705		5.15437e-06	0.00045683	0.304934	0.0241879
																	-0.0958986	0.0968479	2.1497	0.46518	0.389837		9.16778e-06	0.000642029	0.390158	0.0306117		0	0.0968479	2.14751	0.465655	0.305162		5.15437e-06	0.00045683	0.305391	0.0241879		-0.0968479	0	2.14751	0.465655	0.305162		5.15437e-06	0.00045683	0.305391	0.0241879
																	-0.0954474	0.096391	2.14966	0.465189	0.390479		9.00002e-06	0.000642041	0.3908	0.0300509		0	0.096391	2.14749	0.46566	0.305619		5.15437e-06	0.00045683	0.305847	0.0241879		-0.096391	0	2.14749	0.46566	0.305619		5.15437e-06	0.00045683	0.305847	0.0241879
																	-0.0949963	0.0959342	2.14962	0.465198	0.391121		9.00067e-06	0.000642089	0.391442	0.0300509		0	0.0959342	2.14747	0.465665	0.306076		5.15437e-06	0.00045683	0.306304	0.0241879		-0.0959342	0	2.14747	0.465665	0.306076		5.15437e-06	0.00045683	0.306304	0.0241879
																	-0.0945451	0.0954774	2.14958	0.465207	0.391763		8.81055e-06	0.000642136	0.392084	0.029414		0	0.0954774	2.14744	0.46567	0.306533		4.87006e-06	0.00045683	0.306761	0.0228537		-0.0954774	0	2.14744	0.46567	0.306533		4.87006e-06	0.00045683	0.306761	0.0228537
																	-0.0940938	0.0950206	2.14954	0.465216	0.392405		8.81067e-06	0.000642145	0.392726	0.029414		0	0.0950206	2.14742	0.465675	0.306989		4.87006e-06	0.00045683	0.307218	0.0228537		-0.0950206	0	2.14742	0.465675	0.306989		4.87006e-06	0.00045683	0.307218	0.0228537
																	-0.0936425	0.0945637	2.1495	0.465225	0.393047		8.81079e-06	0.000642153	0.393369	0.029414		0	0.0945637	2.1474	0.46568	0.307446		4.87006e-06	0.00045683	0.307675	0.0228537		-0.0945637	0	2.1474	0.46568	0.307446		4.87006e-06	0.00045683	0.307675	0.0228537
																	-0.0931913	0.0941069	2.14946	0.465234	0.39369		8.8109e-06	0.000642162	0.394011	0.029414		0	0.0941069	2.14737	0.465685	0.307903		4.87006e-06	0.00045683	0.308132	0.0228537		-0.0941069	0	2.14737	0.465685	0.307903		4.87006e-06	0.00045683	0.308132	0.0228537
																	-0.0927399	0.0936501	2.14942	0.465243	0.394332		8.81102e-06	0.00064217	0.394653	0.029414		0	0.0936501	2.14735	0.46569	0.30836		4.87006e-06	0.00045683	0.308588	0.0228537		-0.0936501	0	2.14735	0.46569	0.30836		4.87006e-06	0.00045683	0.308588	0.0228537
																	-0.0922886	0.0931932	2.14938	0.465252	0.394974		8.81113e-06	0.000642178	0.395295	0.029414		0	0.0931932	2.14733	0.465695	0.308817		4.87006e-06	0.00045683	0.309045	0.0228537		-0.0931932	0	2.14733	0.465695	0.308817		4.87006e-06	0.00045683	0.309045	0.0228537
																	-0.0918373	0.0927364	2.14933	0.46526	0.395616		8.81124e-06	0.000642187	0.395937	0.029414		0	0.0927364	2.14731	0.4657	0.309274		4.87006e-06	0.00045683	0.309502	0.0228537		-0.0927364	0	2.14731	0.4657	0.309274		4.87006e-06	0.00045683	0.309502	0.0228537
																	-0.091386	0.0922796	2.14929	0.465269	0.396258		8.81136e-06	0.000642195	0.396579	0.029414		0	0.0922796	2.14728	0.465705	0.30973		4.87006e-06	0.00045683	0.309959	0.0228537		-0.0922796	0	2.14728	0.465705	0.30973		4.87006e-06	0.00045683	0.309959	0.0228537
																	-0.0909346	0.0918228	2.14925	0.465278	0.3969		8.81147e-06	0.000642203	0.397222	0.029414		0	0.0918228	2.14726	0.465709	0.310187		4.87006e-06	0.00045683	0.310416	0.0228537		-0.0918228	0	2.14726	0.465709	0.310187		4.87006e-06	0.00045683	0.310416	0.0228537
																	-0.0904832	0.0913659	2.14921	0.465287	0.397543		8.63384e-06	0.000642211	0.397864	0.0288207		0	0.0913659	2.14724	0.465714	0.310644		4.87006e-06	0.00045683	0.310873	0.0228537		-0.0913659	0	2.14724	0.465714	0.310644		4.87006e-06	0.00045683	0.310873	0.0228537
																	-0.0900319	0.0909091	2.14917	0.465295	0.398185		8.6213e-06	0.000642253	0.398506	0.0287769		0	0.0909091	2.14722	0.465719	0.311101		4.87006e-06	0.00045683	0.311329	0.0228537		-0.0909091	0	2.14722	0.465719	0.311101		4.87006e-06	0.00045683	0.311329	0.0228537
																	-0.0895804	0.0904523	2.14913	0.465304	0.398827		8.42102e-06	0.000642297	0.399148	0.0281065		0	0.0904523	2.14719	0.465724	0.311558		4.58992e-06	0.00045683	0.311786	0.0215391		-0.0904523	0	2.14719	0.465724	0.311558		4.58992e-06	0.00045683	0.311786	0.0215391
																	-0.0891289	0.0899954	2.14909	0.465312	0.399469		8.42112e-06	0.000642305	0.399791	0.0281065		0	0.0899954	2.14717	0.465729	0.312015		4.58992e-06	0.00045683	0.312243	0.0215391		-0.0899954	0	2.14717	0.465729	0.312015		4.58992e-06	0.00045683	0.312243	0.0215391
																	-0.0886774	0.0895386	2.14905	0.465321	0.400112		8.42121e-06	0.000642312	0.400433	0.0281065		0	0.0895386	2.14715	0.465733	0.312471		4.58992e-06	0.00045683	0.3127	0.0215391		-0.0895386	0	2.14715	0.465733	0.312471		4.58992e-06	0.00045683	0.3127	0.0215391
																	-0.0882259	0.0890818	2.14902	0.465329	0.400754		8.42131e-06	0.000642319	0.401075	0.0281065		0	0.0890818	2.14713	0.465738	0.312928		4.58992e-06	0.00045683	0.313157	0.0215391		-0.0890818	0	2.14713	0.465738	0.312928		4.58992e-06	0.00045683	0.313157	0.0215391
																	-0.0877743	0.0886249	2.14898	0.465338	0.401396		8.4214e-06	0.000642326	0.401718	0.0281065		0	0.0886249	2.14711	0.465742	0.313385		4.58992e-06	0.00045683	0.313614	0.0215391		-0.0886249	0	2.14711	0.465742	0.313385		4.58992e-06	0.00045683	0.313614	0.0215391
																	-0.0873228	0.0881681	2.14894	0.465346	0.402039		8.42149e-06	0.000642333	0.40236	0.0281065		0	0.0881681	2.14709	0.465747	0.313842		4.58992e-06	0.00045683	0.31407	0.0215391		-0.0881681	0	2.14709	0.465747	0.313842		4.58992e-06	0.00045683	0.31407	0.0215391
																	-0.0868713	0.0877113	2.1489	0.465355	0.402681		8.42159e-06	0.000642341	0.403002	0.0281065		0	0.0877113	2.14707	0.465752	0.314299		4.58992e-06	0.00045683	0.314527	0.0215391		-0.0877113	0	2.14707	0.465752	0.314299		4.58992e-06	0.00045683	0.314527	0.0215391
																	-0.0864197	0.0872545	2.14886	0.465363	0.403323		8.42168e-06	0.000642348	0.403645	0.0281065		0	0.0872545	2.14705	0.465756	0.314756		4.58992e-06	0.00045683	0.314984	0.0215391		-0.0872545	0	2.14705	0.465756	0.314756		4.58992e-06	0.00045683	0.314984	0.0215391
																	-0.0859681	0.0867976	2.14882	0.465371	0.403966		8.42177e-06	0.000642355	0.404287	0.0281065		0	0.0867976	2.14703	0.465761	0.315212		4.58992e-06	0.00045683	0.315441	0.0215391		-0.0867976	0	2.14703	0.465761	0.315212		4.58992e-06	0.00045683	0.315441	0.0215391
																	-0.0855165	0.0863408	2.14878	0.46538	0.404608		8.261e-06	0.000642362	0.404929	0.0275696		0	0.0863408	2.147	0.465765	0.315669		4.58992e-06	0.00045683	0.315898	0.0215391		-0.0863408	0	2.147	0.465765	0.315669		4.58992e-06	0.00045683	0.315898	0.0215391
																	-0.0850649	0.085884	2.14874	0.465388	0.40525		8.22172e-06	0.000642396	0.405572	0.027437		0	0.085884	2.14698	0.46577	0.316126		4.58992e-06	0.00045683	0.316354	0.0215391		-0.085884	0	2.14698	0.46577	0.316126		4.58992e-06	0.00045683	0.316354	0.0215391
																	-0.0846133	0.0854271	2.14871	0.465396	0.405893		8.01246e-06	0.000642438	0.406214	0.026737		0	0.0854271	2.14696	0.465774	0.316583		4.31344e-06	0.00045683	0.316811	0.0202417		-0.0854271	0	2.14696	0.465774	0.316583		4.31344e-06	0.00045683	0.316811	0.0202417
																	-0.0841616	0.0849703	2.14867	0.465404	0.406535		8.01253e-06	0.000642444	0.406857	0.026737		0	0.0849703	2.14694	0.465779	0.31704		4.31344e-06	0.00045683	0.317268	0.0202417		-0.0849703	0	2.14694	0.465779	0.31704		4.31344e-06	0.00045683	0.317268	0.0202417
																	-0.0837099	0.0845135	2.14863	0.465412	0.407178		8.01261e-06	0.00064245	0.407499	0.026737		0	0.0845135	2.14692	0.465783	0.317497		4.31344e-06	0.00045683	0.317725	0.0202417		-0.0845135	0	2.14692	0.465783	0.317497		4.31344e-06	0.00045683	0.317725	0.0202417
																	-0.0832582	0.0840566	2.1486	0.46542	0.40782		8.01269e-06	0.000642456	0.408141	0.026737		0	0.0840566	2.1469	0.465787	0.317953		4.31344e-06	0.00045683	0.318182	0.0202417		-0.0840566	0	2.1469	0.465787	0.317953		4.31344e-06	0.00045683	0.318182	0.0202417
																	-0.0828065	0.0835998	2.14856	0.465428	0.408463		8.01276e-06	0.000642462	0.408784	0.026737		0	0.0835998	2.14688	0.465792	0.31841		4.31344e-06	0.00045683	0.318639	0.0202417		-0.0835998	0	2.14688	0.465792	0.31841		4.31344e-06	0.00045683	0.318639	0.0202417
																	-0.0823547	0.083143	2.14852	0.465436	0.409105		8.01284e-06	0.000642469	0.409426	0.026737		0	0.083143	2.14686	0.465796	0.318867		4.31344e-06	0.00045683	0.319095	0.0202417		-0.083143	0	2.14686	0.465796	0.318867		4.31344e-06	0.00045683	0.319095	0.0202417
																	-0.081903	0.0826862	2.14848	0.465444	0.409748		8.01292e-06	0.000642475	0.410069	0.026737		0	0.0826862	2.14684	0.4658	0.319324		4.31344e-06	0.00045683	0.319552	0.0202417		-0.0826862	0	2.14684	0.4658	0.319324		4.31344e-06	0.00045683	0.319552	0.0202417
																	-0.0814512	0.0822293	2.14845	0.465452	0.41039		8.01299e-06	0.000642481	0.410711	0.026737		0	0.0822293	2.14682	0.465805	0.319781		4.31344e-06	0.00045683	0.320009	0.0202417		-0.0822293	0	2.14682	0.465805	0.319781		4.31344e-06	0.00045683	0.320009	0.0202417
																	-0.0809995	0.0817725	2.14841	0.46546	0.411033		8.01307e-06	0.000642487	0.411354	0.026737		0	0.0817725	2.1468	0.465809	0.320238		4.31344e-06	0.00045683	0.320466	0.0202417		-0.0817725	0	2.1468	0.465809	0.320238		4.31344e-06	0.00045683	0.320466	0.0202417
																	-0.0805477	0.0813157	2.14837	0.465468	0.411675		7.87141e-06	0.000642493	0.411996	0.0262641		0	0.0813157	2.14678	0.465813	0.320694		4.31344e-06	0.00045683	0.320923	0.0202417		-0.0813157	0	2.14678	0.465813	0.320694		4.31344e-06	0.00045683	0.320923	0.0202417
																	-0.0800959	0.0808588	2.14834	0.465476	0.412318		7.80429e-06	0.000642521	0.412639	0.026039		0	0.0808588	2.14676	0.465818	0.321151		4.31344e-06	0.00045683	0.32138	0.0202417		-0.0808588	0	2.14676	0.465818	0.321151		4.31344e-06	0.00045683	0.32138	0.0202417
																	-0.0796441	0.080402	2.1483	0.465484	0.41296		7.58714e-06	0.000642559	0.413281	0.0253129		0	0.080402	2.14674	0.465822	0.321608		4.04017e-06	0.00045683	0.321836	0.0189593		-0.080402	0	2.14674	0.465822	0.321608		4.04017e-06	0.00045683	0.321836	0.0189593
																	-0.0791922	0.0799452	2.14827	0.465492	0.413603		7.58721e-06	0.000642565	0.413924	0.0253129		0	0.0799452	2.14672	0.465826	0.322065		4.04017e-06	0.00045683	0.322293	0.0189593		-0.0799452	0	2.14672	0.465826	0.322065		4.04017e-06	0.00045683	0.322293	0.0189593
																	-0.0787403	0.0794884	2.14823	0.465499	0.414245		7.58727e-06	0.00064257	0.414566	0.0253129		0	0.0794884	2.14671	0.46583	0.322522		4.04017e-06	0.00045683	0.32275	0.0189593		-0.0794884	0	2.14671	0.46583	0.322522		4.04017e-06	0.00045683	0.32275	0.0189593
																	-0.0782885	0.0790315	2.1482	0.465507	0.414888		7.58733e-06	0.000642575	0.415209	0.0253129		0	0.0790315	2.14669	0.465834	0.322979		4.04017e-06	0.00045683	0.323207	0.0189593		-0.0790315	0	2.14669	0.465834	0.322979		4.04017e-06	0.00045683	0.323207	0.0189593
																	-0.0778366	0.0785747	2.14816	0.465514	0.41553		7.58739e-06	0.000642581	0.415852	0.0253129		0	0.0785747	2.14667	0.465838	0.323435		4.04017e-06	0.00045683	0.323664	0.0189593		-0.0785747	0	2.14667	0.465838	0.323435		4.04017e-06	0.00045683	0.323664	0.0189593
																	-0.0773847	0.0781179	2.14813	0.465522	0.416173		7.58746e-06	0.000642586	0.416494	0.0253129		0	0.0781179	2.14665	0.465842	0.323892		4.04017e-06	0.00045683	0.324121	0.0189593		-0.0781179	0	2.14665	0.465842	0.323892		4.04017e-06	0.00045683	0.324121	0.0189593
																	-0.0769327	0.077661	2.14809	0.46553	0.416815		7.58752e-06	0.000642591	0.417137	0.0253129		0	0.077661	2.14663	0.465846	0.324349		4.04017e-06	0.00045683	0.324577	0.0189593		-0.077661	0	2.14663	0.465846	0.324349		4.04017e-06	0.00045683	0.324577	0.0189593
																	-0.0764808	0.0772042	2.14806	0.465537	0.417458		7.58758e-06	0.000642596	0.417779	0.0253129		0	0.0772042	2.14661	0.46585	0.324806		4.04017e-06	0.00045683	0.325034	0.0189593		-0.0772042	0	2.14661	0.46585	0.324806		4.04017e-06	0.00045683	0.325034	0.0189593
																	-0.0760289	0.0767474	2.14802	0.465545	0.418101		7.58764e-06	0.000642602	0.418422	0.0253129		0	0.0767474	2.14659	0.465854	0.325263		4.04017e-06	0.00045683	0.325491	0.0189593		-0.0767474	0	2.14659	0.465854	0.325263		4.04017e-06	0.00045683	0.325491	0.0189593
																	-0.075577	0.0762905	2.14799	0.465552	0.418743		7.46692e-06	0.000642607	0.419065	0.02491		0	0.0762905	2.14658	0.465858	0.32572		4.04017e-06	0.00045683	0.325948	0.0189593		-0.0762905	0	2.14658	0.465858	0.32572		4.04017e-06	0.00045683	0.325948	0.0189593
																	-0.075125	0.0758337	2.14795	0.46556	0.419386		7.37122e-06	0.000642629	0.419707	0.0245899		0	0.0758337	2.14656	0.465862	0.326176		4.04017e-06	0.00045683	0.326405	0.0189593		-0.0758337	0	2.14656	0.465862	0.326176		4.04017e-06	0.00045683	0.326405	0.0189593
																	-0.0746731	0.0753769	2.14792	0.465567	0.420028		7.14721e-06	0.000642665	0.42035	0.0238413		0	0.0753769	2.14654	0.465866	0.326633		3.76969e-06	0.00045683	0.326862	0.01769		-0.0753769	0	2.14654	0.465866	0.326633		3.76969e-06	0.00045683	0.326862	0.01769
																	-0.074221	0.0749201	2.14788	0.465574	0.420671		7.14726e-06	0.00064267	0.420992	0.0238413		0	0.0749201	2.14652	0.46587	0.32709		3.76969e-06	0.00045683	0.327318	0.01769		-0.0749201	0	2.14652	0.46587	0.32709		3.76969e-06	0.00045683	0.327318	0.01769
																	-0.073769	0.0744632	2.14785	0.465581	0.421314		7.14731e-06	0.000642674	0.421635	0.0238413		0	0.0744632	2.1465	0.465874	0.327547		3.76969e-06	0.00045683	0.327775	0.01769		-0.0744632	0	2.1465	0.465874	0.327547		3.76969e-06	0.00045683	0.327775	0.01769
																	-0.073317	0.0740064	2.14782	0.465589	0.421956		7.14736e-06	0.000642679	0.422278	0.0238413		0	0.0740064	2.14649	0.465878	0.328004		3.76969e-06	0.00045683	0.328232	0.01769		-0.0740064	0	2.14649	0.465878	0.328004		3.76969e-06	0.00045683	0.328232	0.01769
																	-0.0728649	0.0735496	2.14779	0.465596	0.422599		7.14741e-06	0.000642684	0.422921	0.0238413		0	0.0735496	2.14647	0.465881	0.32846		3.76969e-06	0.00045683	0.328689	0.01769		-0.0735496	0	2.14647	0.465881	0.32846		3.76969e-06	0.00045683	0.328689	0.01769
																	-0.0724129	0.0730927	2.14775	0.465603	0.423242		7.14746e-06	0.000642688	0.423563	0.0238413		0	0.0730927	2.14645	0.465885	0.328917		3.76969e-06	0.00045683	0.329146	0.01769		-0.0730927	0	2.14645	0.465885	0.328917		3.76969e-06	0.00045683	0.329146	0.01769
																	-0.0719608	0.0726359	2.14772	0.46561	0.423885		7.14751e-06	0.000642693	0.424206	0.0238413		0	0.0726359	2.14643	0.465889	0.329374		3.76969e-06	0.00045683	0.329603	0.01769		-0.0726359	0	2.14643	0.465889	0.329374		3.76969e-06	0.00045683	0.329603	0.01769
																	-0.0715088	0.0721791	2.14769	0.465617	0.424527		7.14756e-06	0.000642697	0.424849	0.0238413		0	0.0721791	2.14642	0.465893	0.329831		3.76969e-06	0.00045683	0.330059	0.01769		-0.0721791	0	2.14642	0.465893	0.329831		3.76969e-06	0.00045683	0.330059	0.01769
																	-0.0710567	0.0717222	2.14765	0.465624	0.42517		7.14761e-06	0.000642702	0.425491	0.0238413		0	0.0717222	2.1464	0.465897	0.330288		3.76969e-06	0.00045683	0.330516	0.01769		-0.0717222	0	2.1464	0.465897	0.330288		3.76969e-06	0.00045683	0.330516	0.01769
																	-0.0706046	0.0712654	2.14762	0.465632	0.425813		7.04926e-06	0.000642706	0.426134	0.023513		0	0.0712654	2.14638	0.4659	0.330745		3.76969e-06	0.00045683	0.330973	0.01769		-0.0712654	0	2.14638	0.4659	0.330745		3.76969e-06	0.00045683	0.330973	0.01769
																	-0.0701525	0.0708086	2.14759	0.465639	0.426455		6.92455e-06	0.000642723	0.426777	0.0230964		0	0.0708086	2.14636	0.465904	0.331201		3.76969e-06	0.00045683	0.33143	0.01769		-0.0708086	0	2.14636	0.465904	0.331201		3.76969e-06	0.00045683	0.33143	0.01769
																	-0.0697004	0.0703518	2.14756	0.465645	0.427098		6.69461e-06	0.000642757	0.427419	0.0223283		0	0.0703518	2.14635	0.465908	0.331658		3.50163e-06	0.00045683	0.331887	0.0164321		-0.0703518	0	2.14635	0.465908	0.331658		3.50163e-06	0.00045683	0.331887	0.0164321
																	-0.0692483	0.0698949	2.14753	0.465652	0.427741		6.69465e-06	0.000642761	0.428062	0.0223283		0	0.0698949	2.14633	0.465911	0.332115		3.50163e-06	0.00045683	0.332344	0.0164321		-0.0698949	0	2.14633	0.465911	0.332115		3.50163e-06	0.00045683	0.332344	0.0164321
																	-0.0687961	0.0694381	2.14749	0.465659	0.428384		6.69469e-06	0.000642765	0.428705	0.0223283		0	0.0694381	2.14631	0.465915	0.332572		3.50163e-06	0.00045683	0.3328	0.0164321		-0.0694381	0	2.14631	0.465915	0.332572		3.50163e-06	0.00045683	0.3328	0.0164321
																	-0.0683439	0.0689813	2.14746	0.465666	0.429026		6.69473e-06	0.000642769	0.429348	0.0223283		0	0.0689813	2.1463	0.465918	0.333029		3.50163e-06	0.00045683	0.333257	0.0164321		-0.0689813	0	2.1463	0.465918	0.333029		3.50163e-06	0.00045683	0.333257	0.0164321
																	-0.0678918	0.0685244	2.14743	0.465672	0.429669		6.69477e-06	0.000642773	0.429991	0.0223283		0	0.0685244	2.14628	0.465922	0.333486		3.50163e-06	0.00045683	0.333714	0.0164321		-0.0685244	0	2.14628	0.465922	0.333486		3.50163e-06	0.00045683	0.333714	0.0164321
																	-0.0674396	0.0680676	2.1474	0.465679	0.430312		6.69481e-06	0.000642777	0.430633	0.0223283		0	0.0680676	2.14627	0.465925	0.333942		3.50163e-06	0.00045683	0.334171	0.0164321		-0.0680676	0	2.14627	0.465925	0.333942		3.50163e-06	0.00045683	0.334171	0.0164321
																	-0.0669874	0.0676108	2.14737	0.465686	0.430955		6.69485e-06	0.000642781	0.431276	0.0223283		0	0.0676108	2.14625	0.465929	0.334399		3.50163e-06	0.00045683	0.334628	0.0164321		-0.0676108	0	2.14625	0.465929	0.334399		3.50163e-06	0.00045683	0.334628	0.0164321
																	-0.0665352	0.067154	2.14734	0.465692	0.431597		6.69489e-06	0.000642784	0.431919	0.0223283		0	0.067154	2.14623	0.465932	0.334856		3.50163e-06	0.00045683	0.335085	0.0164321		-0.067154	0	2.14623	0.465932	0.334856		3.50163e-06	0.00045683	0.335085	0.0164321
																	-0.066083	0.0666971	2.14731	0.465699	0.43224		6.69493e-06	0.000642788	0.432562	0.0223283		0	0.0666971	2.14622	0.465936	0.335313		3.50163e-06	0.00045683	0.335541	0.0164321		-0.0666971	0	2.14622	0.465936	0.335313		3.50163e-06	0.00045683	0.335541	0.0164321
																	-0.0656308	0.0662403	2.14728	0.465706	0.432883		6.62003e-06	0.000642792	0.433204	0.0220784		0	0.0662403	2.1462	0.465939	0.33577		3.50163e-06	0.00045683	0.335998	0.0164321		-0.0662403	0	2.1462	0.465939	0.33577		3.50163e-06	0.00045683	0.335998	0.0164321
																	-0.0651786	0.0657835	2.14725	0.465712	0.433526		6.46614e-06	0.000642805	0.433847	0.0215647		0	0.0657835	2.14619	0.465943	0.336227		3.50163e-06	0.00045683	0.336455	0.0164321		-0.0657835	0	2.14619	0.465943	0.336227		3.50163e-06	0.00045683	0.336455	0.0164321
																	-0.0647264	0.0653266	2.14722	0.465719	0.434169		6.23112e-06	0.000642837	0.43449	0.0207799		0	0.0653266	2.14617	0.465946	0.336683		3.23567e-06	0.00045683	0.336912	0.015184		-0.0653266	0	2.14617	0.465946	0.336683		3.23567e-06	0.00045683	0.336912	0.015184
																	-0.0642741	0.0648698	2.14719	0.465725	0.434811		6.23115e-06	0.00064284	0.435133	0.0207799		0	0.0648698	2.14615	0.46595	0.33714		3.23567e-06	0.00045683	0.337369	0.015184		-0.0648698	0	2.14615	0.46595	0.33714		3.23567e-06	0.00045683	0.337369	0.015184
																	-0.0638219	0.064413	2.14716	0.465731	0.435454		6.23118e-06	0.000642843	0.435776	0.0207799		0	0.064413	2.14614	0.465953	0.337597		3.23567e-06	0.00045683	0.337825	0.015184		-0.064413	0	2.14614	0.465953	0.337597		3.23567e-06	0.00045683	0.337825	0.015184
																	-0.0633696	0.0639561	2.14713	0.465738	0.436097		6.23121e-06	0.000642847	0.436419	0.0207799		0	0.0639561	2.14613	0.465956	0.338054		3.23567e-06	0.00045683	0.338282	0.015184		-0.0639561	0	2.14613	0.465956	0.338054		3.23567e-06	0.00045683	0.338282	0.015184
																	-0.0629173	0.0634993	2.1471	0.465744	0.43674		6.23125e-06	0.00064285	0.437061	0.0207799		0	0.0634993	2.14611	0.465959	0.338511		3.23567e-06	0.00045683	0.338739	0.015184		-0.0634993	0	2.14611	0.465959	0.338511		3.23567e-06	0.00045683	0.338739	0.015184
																	-0.062465	0.0630425	2.14707	0.46575	0.437383		6.23128e-06	0.000642853	0.437704	0.0207799		0	0.0630425	2.1461	0.465963	0.338968		3.23567e-06	0.00045683	0.339196	0.015184		-0.0630425	0	2.1461	0.465963	0.338968		3.23567e-06	0.00045683	0.339196	0.015184
																	-0.0620127	0.0625857	2.14705	0.465756	0.438026		6.23131e-06	0.000642857	0.438347	0.0207799		0	0.0625857	2.14608	0.465966	0.339424		3.23567e-06	0.00045683	0.339653	0.015184		-0.0625857	0	2.14608	0.465966	0.339424		3.23567e-06	0.00045683	0.339653	0.015184
																	-0.0615604	0.0621288	2.14702	0.465762	0.438669		6.23134e-06	0.00064286	0.43899	0.0207799		0	0.0621288	2.14607	0.465969	0.339881		3.23567e-06	0.00045683	0.34011	0.015184		-0.0621288	0	2.14607	0.465969	0.339881		3.23567e-06	0.00045683	0.34011	0.015184
																	-0.0611081	0.061672	2.14699	0.465769	0.439311		6.23138e-06	0.000642863	0.439633	0.0207799		0	0.061672	2.14605	0.465972	0.340338		3.23567e-06	0.00045683	0.340566	0.015184		-0.061672	0	2.14605	0.465972	0.340338		3.23567e-06	0.00045683	0.340566	0.015184
																	-0.0606558	0.0612152	2.14696	0.465775	0.439954		6.18076e-06	0.000642867	0.440276	0.020611		0	0.0612152	2.14604	0.465975	0.340795		3.23567e-06	0.00045683	0.341023	0.015184		-0.0612152	0	2.14604	0.465975	0.340795		3.23567e-06	0.00045683	0.341023	0.015184
																	-0.0602035	0.0607583	2.14693	0.465781	0.440597		5.99769e-06	0.000642876	0.440919	0.0200002		0	0.0607583	2.14602	0.465979	0.341252		3.23567e-06	0.00045683	0.34148	0.015184		-0.0607583	0	2.14602	0.465979	0.341252		3.23567e-06	0.00045683	0.34148	0.015184
																	-0.0597512	0.0603015	2.1469	0.465787	0.44124		5.75835e-06	0.000642905	0.441561	0.0192012		0	0.0603015	2.14601	0.465982	0.341709		2.97151e-06	0.00045683	0.341937	0.0139444		-0.0603015	0	2.14601	0.465982	0.341709		2.97151e-06	0.00045683	0.341937	0.0139444
																	-0.0592988	0.0598447	2.14688	0.465793	0.441883		5.75838e-06	0.000642908	0.442204	0.0192012		0	0.0598447	2.14599	0.465985	0.342165		2.97151e-06	0.00045683	0.342394	0.0139444		-0.0598447	0	2.14599	0.465985	0.342165		2.97151e-06	0.00045683	0.342394	0.0139444
																	-0.0588465	0.0593878	2.14685	0.465799	0.442526		5.7584e-06	0.000642911	0.442847	0.0192012		0	0.0593878	2.14598	0.465988	0.342622		2.97151e-06	0.00045683	0.342851	0.0139444		-0.0593878	0	2.14598	0.465988	0.342622		2.97151e-06	0.00045683	0.342851	0.0139444
																	-0.0583941	0.058931	2.14682	0.465804	0.443169		5.75843e-06	0.000642914	0.44349	0.0192012		0	0.058931	2.14596	0.465991	0.343079		2.97151e-06	0.00045683	0.343307	0.0139444		-0.058931	0	2.14596	0.465991	0.343079		2.97151e-06	0.00045683	0.343307	0.0139444
																	-0.0579417	0.0584742	2.1468	0.46581	0.443812		5.75845e-06	0.000642917	0.444133	0.0192012		0	0.0584742	2.14595	0.465994	0.343536		2.97151e-06	0.00045683	0.343764	0.0139444		-0.0584742	0	2.14595	0.465994	0.343536		2.97151e-06	0.00045683	0.343764	0.0139444
																	-0.0574893	0.0580174	2.14677	0.465816	0.444455		5.75848e-06	0.00064292	0.444776	0.0192012		0	0.0580174	2.14594	0.465997	0.343993		2.97151e-06	0.00045683	0.344221	0.0139444		-0.0580174	0	2.14594	0.465997	0.343993		2.97151e-06	0.00045683	0.344221	0.0139444
																	-0.0570369	0.0575605	2.14674	0.465822	0.445097		5.75851e-06	0.000642922	0.445419	0.0192012		0	0.0575605	2.14592	0.466	0.34445		2.97151e-06	0.00045683	0.344678	0.0139444		-0.0575605	0	2.14592	0.466	0.34445		2.97151e-06	0.00045683	0.344678	0.0139444
																	-0.0565846	0.0571037	2.14672	0.465827	0.44574		5.75853e-06	0.000642925	0.446062	0.0192012		0	0.0571037	2.14591	0.466003	0.344906		2.97151e-06	0.00045683	0.345135	0.0139444		-0.0571037	0	2.14591	0.466003	0.344906		2.97151e-06	0.00045683	0.345135	0.0139444
																	-0.0561322	0.0566469	2.14669	0.465833	0.446383		5.75856e-06	0.000642928	0.446705	0.0192012		0	0.0566469	2.1459	0.466006	0.345363		2.97151e-06	0.00045683	0.345592	0.0139444		-0.0566469	0	2.1459	0.466006	0.345363		2.97151e-06	0.00045683	0.345592	0.0139444
																	-0.0556798	0.05619	2.14666	0.465839	0.447026		5.73281e-06	0.000642931	0.447348	0.0191153		0	0.05619	2.14588	0.466009	0.34582		2.97151e-06	0.00045683	0.346048	0.0139444		-0.05619	0	2.14588	0.466009	0.34582		2.97151e-06	0.00045683	0.346048	0.0139444
																	-0.0552274	0.0557332	2.14664	0.465845	0.447669		5.52072e-06	0.000642936	0.447991	0.0184079		0	0.0557332	2.14587	0.466012	0.346277		2.97151e-06	0.00045683	0.346505	0.0139444		-0.0557332	0	2.14587	0.466012	0.346277		2.97151e-06	0.00045683	0.346505	0.0139444
																	-0.054775	0.0552764	2.14661	0.46585	0.448312		5.27775e-06	0.000642964	0.448634	0.017597		0	0.0552764	2.14586	0.466015	0.346734		2.7089e-06	0.00045683	0.346962	0.0127121		-0.0552764	0	2.14586	0.466015	0.346734		2.7089e-06	0.00045683	0.346962	0.0127121
																	-0.0543225	0.0548196	2.14659	0.465855	0.448955		5.27777e-06	0.000642967	0.449277	0.017597		0	0.0548196	2.14584	0.466017	0.34719		2.7089e-06	0.00045683	0.347419	0.0127121		-0.0548196	0	2.14584	0.466017	0.34719		2.7089e-06	0.00045683	0.347419	0.0127121
																	-0.0538701	0.0543627	2.14656	0.465861	0.449598		5.27779e-06	0.000642969	0.44992	0.017597		0	0.0543627	2.14583	0.46602	0.347647		2.7089e-06	0.00045683	0.347876	0.0127121		-0.0543627	0	2.14583	0.46602	0.347647		2.7089e-06	0.00045683	0.347876	0.0127121
																	-0.0534176	0.0539059	2.14654	0.465866	0.450241		5.27781e-06	0.000642972	0.450563	0.017597		0	0.0539059	2.14582	0.466023	0.348104		2.7089e-06	0.00045683	0.348333	0.0127121		-0.0539059	0	2.14582	0.466023	0.348104		2.7089e-06	0.00045683	0.348333	0.0127121
																	-0.0529651	0.0534491	2.14652	0.465871	0.450884		5.27783e-06	0.000642974	0.451205	0.017597		0	0.0534491	2.14581	0.466025	0.348561		2.7089e-06	0.00045683	0.348789	0.0127121		-0.0534491	0	2.14581	0.466025	0.348561		2.7089e-06	0.00045683	0.348789	0.0127121
																	-0.0525127	0.0529922	2.14649	0.465877	0.451527		5.27785e-06	0.000642977	0.451848	0.017597		0	0.0529922	2.14579	0.466028	0.349018		2.7089e-06	0.00045683	0.349246	0.0127121		-0.0529922	0	2.14579	0.466028	0.349018		2.7089e-06	0.00045683	0.349246	0.0127121
																	-0.0520602	0.0525354	2.14647	0.465882	0.45217		5.27787e-06	0.000642979	0.452491	0.017597		0	0.0525354	2.14578	0.466031	0.349475		2.7089e-06	0.00045683	0.349703	0.0127121		-0.0525354	0	2.14578	0.466031	0.349475		2.7089e-06	0.00045683	0.349703	0.0127121
																	-0.0516077	0.0520786	2.14644	0.465887	0.452813		5.27789e-06	0.000642981	0.453134	0.017597		0	0.0520786	2.14577	0.466034	0.349931		2.7089e-06	0.00045683	0.35016	0.0127121		-0.0520786	0	2.14577	0.466034	0.349931		2.7089e-06	0.00045683	0.35016	0.0127121
																	-0.0511553	0.0516217	2.14642	0.465892	0.453456		5.27791e-06	0.000642984	0.453777	0.017597		0	0.0516217	2.14576	0.466036	0.350388		2.7089e-06	0.00045683	0.350617	0.0127121		-0.0516217	0	2.14576	0.466036	0.350388		2.7089e-06	0.00045683	0.350617	0.0127121
																	-0.0507028	0.0511649	2.14639	0.465898	0.454099		5.27743e-06	0.000642986	0.45442	0.0175954		0	0.0511649	2.14574	0.466039	0.350845		2.7089e-06	0.00045683	0.351074	0.0127121		-0.0511649	0	2.14574	0.466039	0.350845		2.7089e-06	0.00045683	0.351074	0.0127121
																	-0.0502503	0.0507081	2.14637	0.465903	0.454742		5.03659e-06	0.000642989	0.455063	0.0167923		0	0.0507081	2.14573	0.466042	0.351302		2.7089e-06	0.00045683	0.35153	0.0127121		-0.0507081	0	2.14573	0.466042	0.351302		2.7089e-06	0.00045683	0.35153	0.0127121
																	-0.0497978	0.0502513	2.14635	0.465908	0.455385		4.79059e-06	0.000643015	0.455706	0.0159715		0	0.0502513	2.14572	0.466044	0.351759		2.4476e-06	0.00045683	0.351987	0.0114859		-0.0502513	0	2.14572	0.466044	0.351759		2.4476e-06	0.00045683	0.351987	0.0114859
																	-0.0493453	0.0497944	2.14632	0.465913	0.456028		4.7906e-06	0.000643017	0.456349	0.0159715		0	0.0497944	2.14571	0.466047	0.352216		2.4476e-06	0.00045683	0.352444	0.0114859		-0.0497944	0	2.14571	0.466047	0.352216		2.4476e-06	0.00045683	0.352444	0.0114859
																	-0.0488928	0.0493376	2.1463	0.465918	0.456671		4.79062e-06	0.000643019	0.456992	0.0159715		0	0.0493376	2.1457	0.466049	0.352672		2.4476e-06	0.00045683	0.352901	0.0114859		-0.0493376	0	2.1457	0.466049	0.352672		2.4476e-06	0.00045683	0.352901	0.0114859
																	-0.0484403	0.0488808	2.14628	0.465922	0.457314		4.79064e-06	0.000643021	0.457635	0.0159715		0	0.0488808	2.14568	0.466052	0.353129		2.4476e-06	0.00045683	0.353358	0.0114859		-0.0488808	0	2.14568	0.466052	0.353129		2.4476e-06	0.00045683	0.353358	0.0114859
																	-0.0479877	0.0484239	2.14626	0.465927	0.457957		4.79065e-06	0.000643023	0.458278	0.0159715		0	0.0484239	2.14567	0.466054	0.353586		2.4476e-06	0.00045683	0.353815	0.0114859		-0.0484239	0	2.14567	0.466054	0.353586		2.4476e-06	0.00045683	0.353815	0.0114859
																	-0.0475352	0.0479671	2.14624	0.465932	0.4586		4.79067e-06	0.000643025	0.458921	0.0159715		0	0.0479671	2.14566	0.466057	0.354043		2.4476e-06	0.00045683	0.354271	0.0114859		-0.0479671	0	2.14566	0.466057	0.354043		2.4476e-06	0.00045683	0.354271	0.0114859
																	-0.0470827	0.0475103	2.14621	0.465937	0.459243		4.79068e-06	0.000643027	0.459565	0.0159715		0	0.0475103	2.14565	0.466059	0.3545		2.4476e-06	0.00045683	0.354728	0.0114859		-0.0475103	0	2.14565	0.466059	0.3545		2.4476e-06	0.00045683	0.354728	0.0114859
																	-0.0466301	0.0470534	2.14619	0.465942	0.459886		4.7907e-06	0.000643029	0.460208	0.0159715		0	0.0470534	2.14564	0.466062	0.354957		2.4476e-06	0.00045683	0.355185	0.0114859		-0.0470534	0	2.14564	0.466062	0.354957		2.4476e-06	0.00045683	0.355185	0.0114859
																	-0.0461776	0.0465966	2.14617	0.465946	0.460529		4.79071e-06	0.000643032	0.460851	0.0159715		0	0.0465966	2.14563	0.466064	0.355413		2.4476e-06	0.00045683	0.355642	0.0114859		-0.0465966	0	2.14563	0.466064	0.355413		2.4476e-06	0.00045683	0.355642	0.0114859
																	-0.045725	0.0461398	2.14615	0.465951	0.461172		4.79073e-06	0.000643034	0.461494	0.0159715		0	0.0461398	2.14562	0.466066	0.35587		2.4476e-06	0.00045683	0.356099	0.0114859		-0.0461398	0	2.14562	0.466066	0.35587		2.4476e-06	0.00045683	0.356099	0.0114859
																	-0.0452725	0.045683	2.14613	0.465956	0.461815		4.57152e-06	0.000643036	0.462137	0.0152406		0	0.045683	2.14561	0.466069	0.356327		2.4476e-06	0.00045683	0.356556	0.0114859		-0.045683	0	2.14561	0.466069	0.356327		2.4476e-06	0.00045683	0.356556	0.0114859
																	-0.0448199	0.0452261	2.1461	0.46596	0.462458		4.298e-06	0.000643058	0.46278	0.0143283		0	0.0452261	2.14559	0.466071	0.356784		2.18741e-06	0.00045683	0.357012	0.0102649		-0.0452261	0	2.14559	0.466071	0.356784		2.18741e-06	0.00045683	0.357012	0.0102649
																	-0.0443674	0.0447693	2.14609	0.465965	0.463101		4.29801e-06	0.00064306	0.463423	0.0143283		0	0.0447693	2.14558	0.466074	0.357241		2.18741e-06	0.00045683	0.357469	0.0102649		-0.0447693	0	2.14558	0.466074	0.357241		2.18741e-06	0.00045683	0.357469	0.0102649
																	-0.0439148	0.0443125	2.14607	0.465969	0.463744		4.29802e-06	0.000643062	0.464066	0.0143283		0	0.0443125	2.14557	0.466076	0.357698		2.18741e-06	0.00045683	0.357926	0.0102649		-0.0443125	0	2.14557	0.466076	0.357698		2.18741e-06	0.00045683	0.357926	0.0102649
																	-0.0434622	0.0438556	2.14605	0.465973	0.464387		4.29803e-06	0.000643063	0.464709	0.0143283		0	0.0438556	2.14556	0.466078	0.358154		2.18741e-06	0.00045683	0.358383	0.0102649		-0.0438556	0	2.14556	0.466078	0.358154		2.18741e-06	0.00045683	0.358383	0.0102649
																	-0.0430096	0.0433988	2.14603	0.465978	0.46503		4.29804e-06	0.000643065	0.465352	0.0143283		0	0.0433988	2.14555	0.46608	0.358611		2.18741e-06	0.00045683	0.35884	0.0102649		-0.0433988	0	2.14555	0.46608	0.358611		2.18741e-06	0.00045683	0.35884	0.0102649
																	-0.042557	0.042942	2.14601	0.465982	0.465673		4.29805e-06	0.000643067	0.465995	0.0143283		0	0.042942	2.14554	0.466082	0.359068		2.18741e-06	0.00045683	0.359296	0.0102649		-0.042942	0	2.14554	0.466082	0.359068		2.18741e-06	0.00045683	0.359296	0.0102649
																	-0.0421044	0.0424852	2.14599	0.465986	0.466317		4.29807e-06	0.000643069	0.466638	0.0143283		0	0.0424852	2.14553	0.466084	0.359525		2.18741e-06	0.00045683	0.359753	0.0102649		-0.0424852	0	2.14553	0.466084	0.359525		2.18741e-06	0.00045683	0.359753	0.0102649
																	-0.0416518	0.0420283	2.14597	0.465991	0.46696		4.29808e-06	0.00064307	0.467281	0.0143283		0	0.0420283	2.14552	0.466087	0.359982		2.18741e-06	0.00045683	0.36021	0.0102649		-0.0420283	0	2.14552	0.466087	0.359982		2.18741e-06	0.00045683	0.36021	0.0102649
																	-0.0411992	0.0415715	2.14595	0.465995	0.467603		4.29809e-06	0.000643072	0.467924	0.0143283		0	0.0415715	2.14551	0.466089	0.360439		2.18741e-06	0.00045683	0.360667	0.0102649		-0.0415715	0	2.14551	0.466089	0.360439		2.18741e-06	0.00045683	0.360667	0.0102649
																	-0.0407466	0.0411147	2.14593	0.465999	0.468246		4.2981e-06	0.000643074	0.468567	0.0143283		0	0.0411147	2.1455	0.466091	0.360895		2.18741e-06	0.00045683	0.361124	0.0102649		-0.0411147	0	2.1455	0.466091	0.360895		2.18741e-06	0.00045683	0.361124	0.0102649
																	-0.040294	0.0406578	2.14591	0.466003	0.468889		4.10218e-06	0.000643076	0.46921	0.0136751		0	0.0406578	2.14549	0.466093	0.361352		2.18741e-06	0.00045683	0.361581	0.0102649		-0.0406578	0	2.14549	0.466093	0.361352		2.18741e-06	0.00045683	0.361581	0.0102649
																	-0.0398414	0.040201	2.14589	0.466008	0.469532		3.80095e-06	0.000643095	0.469853	0.0126705		0	0.040201	2.14548	0.466095	0.361809		1.92815e-06	0.00045683	0.362037	0.00904826		-0.040201	0	2.14548	0.466095	0.361809		1.92815e-06	0.00045683	0.362037	0.00904826
																	-0.0393888	0.0397442	2.14587	0.466011	0.470175		3.80096e-06	0.000643096	0.470497	0.0126705		0	0.0397442	2.14547	0.466097	0.362266		1.92815e-06	0.00045683	0.362494	0.00904826		-0.0397442	0	2.14547	0.466097	0.362266		1.92815e-06	0.00045683	0.362494	0.00904826
																	-0.0389361	0.0392873	2.14585	0.466015	0.470818		3.80097e-06	0.000643098	0.47114	0.0126705		0	0.0392873	2.14547	0.466099	0.362723		1.92815e-06	0.00045683	0.362951	0.00904826		-0.0392873	0	2.14547	0.466099	0.362723		1.92815e-06	0.00045683	0.362951	0.00904826
																	-0.0384835	0.0388305	2.14584	0.466019	0.471461		3.80098e-06	0.000643099	0.471783	0.0126705		0	0.0388305	2.14546	0.466101	0.36318		1.92815e-06	0.00045683	0.363408	0.00904826		-0.0388305	0	2.14546	0.466101	0.36318		1.92815e-06	0.00045683	0.363408	0.00904826
																	-0.0380309	0.0383737	2.14582	0.466023	0.472104		3.80099e-06	0.0006431	0.472426	0.0126705		0	0.0383737	2.14545	0.466103	0.363636		1.92815e-06	0.00045683	0.363865	0.00904826		-0.0383737	0	2.14545	0.466103	0.363636		1.92815e-06	0.00045683	0.363865	0.00904826
																	-0.0375782	0.0379169	2.1458	0.466027	0.472747		3.80099e-06	0.000643102	0.473069	0.0126705		0	0.0379169	2.14544	0.466105	0.364093		1.92815e-06	0.00045683	0.364322	0.00904826		-0.0379169	0	2.14544	0.466105	0.364093		1.92815e-06	0.00045683	0.364322	0.00904826
																	-0.0371256	0.03746	2.14578	0.46603	0.47339		3.801e-06	0.000643103	0.473712	0.0126705		0	0.03746	2.14543	0.466107	0.36455		1.92815e-06	0.00045683	0.364778	0.00904826		-0.03746	0	2.14543	0.466107	0.36455		1.92815e-06	0.00045683	0.364778	0.00904826
																	-0.0366729	0.0370032	2.14577	0.466034	0.474034		3.80101e-06	0.000643105	0.474355	0.0126705		0	0.0370032	2.14542	0.466109	0.365007		1.92815e-06	0.00045683	0.365235	0.00904826		-0.0370032	0	2.14542	0.466109	0.365007		1.92815e-06	0.00045683	0.365235	0.00904826
																	-0.0362203	0.0365464	2.14575	0.466038	0.474677		3.80102e-06	0.000643106	0.474998	0.0126705		0	0.0365464	2.14541	0.466111	0.365464		1.92815e-06	0.00045683	0.365692	0.00904826		-0.0365464	0	2.14541	0.466111	0.365464		1.92815e-06	0.00045683	0.365692	0.00904826
																	-0.0357676	0.0360895	2.14573	0.466042	0.47532		3.80103e-06	0.000643108	0.475641	0.0126705		0	0.0360895	2.1454	0.466113	0.365921		1.92815e-06	0.00045683	0.366149	0.00904826		-0.0360895	0	2.1454	0.466113	0.365921		1.92815e-06	0.00045683	0.366149	0.00904826
																	-0.035315	0.0356327	2.14571	0.466046	0.475963		3.62887e-06	0.000643109	0.476284	0.0120966		0	0.0356327	2.14539	0.466115	0.366377		1.92815e-06	0.00045683	0.366606	0.00904826		-0.0356327	0	2.14539	0.466115	0.366377		1.92815e-06	0.00045683	0.366606	0.00904826
																	-0.0348623	0.0351759	2.1457	0.466049	0.476606		3.3003e-06	0.000643125	0.476928	0.0110011		0	0.0351759	2.14539	0.466117	0.366834		1.66967e-06	0.00045683	0.367063	0.00783527		-0.0351759	0	2.14539	0.466117	0.366834		1.66967e-06	0.00045683	0.367063	0.00783527
																	-0.0344096	0.034719	2.14568	0.466052	0.477249		3.30031e-06	0.000643126	0.477571	0.0110011		0	0.034719	2.14538	0.466118	0.367291		1.66967e-06	0.00045683	0.367519	0.00783527		-0.034719	0	2.14538	0.466118	0.367291		1.66967e-06	0.00045683	0.367519	0.00783527
																	-0.033957	0.0342622	2.14567	0.466056	0.477892		3.30032e-06	0.000643128	0.478214	0.0110011		0	0.0342622	2.14537	0.46612	0.367748		1.66967e-06	0.00045683	0.367976	0.00783527		-0.0342622	0	2.14537	0.46612	0.367748		1.66967e-06	0.00045683	0.367976	0.00783527
																	-0.0335043	0.0338054	2.14565	0.466059	0.478535		3.30032e-06	0.000643129	0.478857	0.0110011		0	0.0338054	2.14536	0.466122	0.368205		1.66967e-06	0.00045683	0.368433	0.00783527		-0.0338054	0	2.14536	0.466122	0.368205		1.66967e-06	0.00045683	0.368433	0.00783527
																	-0.0330516	0.0333486	2.14564	0.466062	0.479179		3.30033e-06	0.00064313	0.4795	0.0110011		0	0.0333486	2.14535	0.466123	0.368661		1.66967e-06	0.00045683	0.36889	0.00783527		-0.0333486	0	2.14535	0.466123	0.368661		1.66967e-06	0.00045683	0.36889	0.00783527
																	-0.0325989	0.0328917	2.14562	0.466066	0.479822		3.30034e-06	0.000643131	0.480143	0.0110011		0	0.0328917	2.14535	0.466125	0.369118		1.66967e-06	0.00045683	0.369347	0.00783527		-0.0328917	0	2.14535	0.466125	0.369118		1.66967e-06	0.00045683	0.369347	0.00783527
																	-0.0321462	0.0324349	2.14561	0.466069	0.480465		3.30034e-06	0.000643132	0.480786	0.0110011		0	0.0324349	2.14534	0.466127	0.369575		1.66967e-06	0.00045683	0.369804	0.00783527		-0.0324349	0	2.14534	0.466127	0.369575		1.66967e-06	0.00045683	0.369804	0.00783527
																	-0.0316935	0.0319781	2.14559	0.466072	0.481108		3.30035e-06	0.000643134	0.481429	0.0110011		0	0.0319781	2.14533	0.466128	0.370032		1.66967e-06	0.00045683	0.37026	0.00783527		-0.0319781	0	2.14533	0.466128	0.370032		1.66967e-06	0.00045683	0.37026	0.00783527
																	-0.0312408	0.0315212	2.14557	0.466076	0.481751		3.30035e-06	0.000643135	0.482073	0.0110011		0	0.0315212	2.14532	0.46613	0.370489		1.66967e-06	0.00045683	0.370717	0.00783527		-0.0315212	0	2.14532	0.46613	0.370489		1.66967e-06	0.00045683	0.370717	0.00783527
																	-0.0307882	0.0310644	2.14556	0.466079	0.482394		3.30036e-06	0.000643136	0.482716	0.0110011		0	0.0310644	2.14532	0.466132	0.370946		1.66967e-06	0.00045683	0.371174	0.00783527		-0.0310644	0	2.14532	0.466132	0.370946		1.66967e-06	0.00045683	0.371174	0.00783527
																	-0.0303355	0.0306076	2.14554	0.466082	0.483037		3.15232e-06	0.000643137	0.483359	0.0105076		0	0.0306076	2.14531	0.466133	0.371402		1.66967e-06	0.00045683	0.371631	0.00783527		-0.0306076	0	2.14531	0.466133	0.371402		1.66967e-06	0.00045683	0.371631	0.00783527
																	-0.0298828	0.0301508	2.14553	0.466085	0.48368		2.79679e-06	0.00064315	0.484002	0.00932232		0	0.0301508	2.1453	0.466135	0.371859		1.41182e-06	0.00045683	0.372088	0.00662525		-0.0301508	0	2.1453	0.466135	0.371859		1.41182e-06	0.00045683	0.372088	0.00662525
																	-0.0294301	0.0296939	2.14552	0.466088	0.484324		2.79679e-06	0.000643151	0.484645	0.00932232		0	0.0296939	2.14529	0.466136	0.372316		1.41182e-06	0.00045683	0.372545	0.00662525		-0.0296939	0	2.14529	0.466136	0.372316		1.41182e-06	0.00045683	0.372545	0.00662525
																	-0.0289773	0.0292371	2.1455	0.466091	0.484967		2.79679e-06	0.000643152	0.485288	0.00932232		0	0.0292371	2.14529	0.466138	0.372773		1.41182e-06	0.00045683	0.373001	0.00662525		-0.0292371	0	2.14529	0.466138	0.372773		1.41182e-06	0.00045683	0.373001	0.00662525
																	-0.0285246	0.0287803	2.14549	0.466094	0.48561		2.7968e-06	0.000643153	0.485931	0.00932232		0	0.0287803	2.14528	0.466139	0.37323		1.41182e-06	0.00045683	0.373458	0.00662525		-0.0287803	0	2.14528	0.466139	0.37323		1.41182e-06	0.00045683	0.373458	0.00662525
																	-0.0280719	0.0283234	2.14548	0.466097	0.486253		2.7968e-06	0.000643154	0.486575	0.00932232		0	0.0283234	2.14528	0.466141	0.373687		1.41182e-06	0.00045683	0.373915	0.00662525		-0.0283234	0	2.14528	0.466141	0.373687		1.41182e-06	0.00045683	0.373915	0.00662525
																	-0.0276192	0.0278666	2.14547	0.466099	0.486896		2.79681e-06	0.000643155	0.487218	0.00932232		0	0.0278666	2.14527	0.466142	0.374143		1.41182e-06	0.00045683	0.374372	0.00662525		-0.0278666	0	2.14527	0.466142	0.374143		1.41182e-06	0.00045683	0.374372	0.00662525
																	-0.0271665	0.0274098	2.14545	0.466102	0.487539		2.79681e-06	0.000643156	0.487861	0.00932232		0	0.0274098	2.14526	0.466143	0.3746		1.41182e-06	0.00045683	0.374829	0.00662525		-0.0274098	0	2.14526	0.466143	0.3746		1.41182e-06	0.00045683	0.374829	0.00662525
																	-0.0267138	0.0269529	2.14544	0.466105	0.488183		2.79682e-06	0.000643157	0.488504	0.00932232		0	0.0269529	2.14526	0.466145	0.375057		1.41182e-06	0.00045683	0.375286	0.00662525		-0.0269529	0	2.14526	0.466145	0.375057		1.41182e-06	0.00045683	0.375286	0.00662525
																	-0.026261	0.0264961	2.14543	0.466108	0.488826		2.79682e-06	0.000643158	0.489147	0.00932232		0	0.0264961	2.14525	0.466146	0.375514		1.41182e-06	0.00045683	0.375742	0.00662525		-0.0264961	0	2.14525	0.466146	0.375514		1.41182e-06	0.00045683	0.375742	0.00662525
																	-0.0258083	0.0260393	2.14541	0.466111	0.489469		2.79682e-06	0.000643159	0.48979	0.00932232		0	0.0260393	2.14524	0.466148	0.375971		1.41182e-06	0.00045683	0.376199	0.00662525		-0.0260393	0	2.14524	0.466148	0.375971		1.41182e-06	0.00045683	0.376199	0.00662525
																	-0.0253556	0.0255825	2.1454	0.466113	0.490112		2.67315e-06	0.00064316	0.490434	0.0089101		0	0.0255825	2.14524	0.466149	0.376428		1.41182e-06	0.00045683	0.376656	0.00662525		-0.0255825	0	2.14524	0.466149	0.376428		1.41182e-06	0.00045683	0.376656	0.00662525
																	-0.0249029	0.0251256	2.14539	0.466116	0.490755		2.29102e-06	0.000643171	0.491077	0.00763624		0	0.0251256	2.14523	0.466151	0.376884		1.15448e-06	0.00045683	0.377113	0.00541762		-0.0251256	0	2.14523	0.466151	0.376884		1.15448e-06	0.00045683	0.377113	0.00541762
																	-0.0244501	0.0246688	2.14538	0.466118	0.491398		2.29102e-06	0.000643171	0.49172	0.00763624		0	0.0246688	2.14522	0.466152	0.377341		1.15448e-06	0.00045683	0.37757	0.00541762		-0.0246688	0	2.14522	0.466152	0.377341		1.15448e-06	0.00045683	0.37757	0.00541762
																	-0.0239974	0.024212	2.14537	0.466121	0.492042		2.29102e-06	0.000643172	0.492363	0.00763624		0	0.024212	2.14522	0.466153	0.377798		1.15448e-06	0.00045683	0.378026	0.00541762		-0.024212	0	2.14522	0.466153	0.377798		1.15448e-06	0.00045683	0.378026	0.00541762
																	-0.0235446	0.0237551	2.14536	0.466123	0.492685		2.29103e-06	0.000643173	0.493006	0.00763624		0	0.0237551	2.14521	0.466154	0.378255		1.15448e-06	0.00045683	0.378483	0.00541762		-0.0237551	0	2.14521	0.466154	0.378255		1.15448e-06	0.00045683	0.378483	0.00541762
																	-0.0230919	0.0232983	2.14535	0.466125	0.493328		2.29103e-06	0.000643174	0.493649	0.00763624		0	0.0232983	2.14521	0.466155	0.378712		1.15448e-06	0.00045683	0.37894	0.00541762		-0.0232983	0	2.14521	0.466155	0.378712		1.15448e-06	0.00045683	0.37894	0.00541762
																	-0.0226391	0.0228415	2.14534	0.466127	0.493971		2.29103e-06	0.000643175	0.494293	0.00763624		0	0.0228415	2.1452	0.466156	0.379169		1.15448e-06	0.00045683	0.379397	0.00541762		-0.0228415	0	2.1452	0.466156	0.379169		1.15448e-06	0.00045683	0.379397	0.00541762
																	-0.0221864	0.0223847	2.14533	0.46613	0.494614		2.29103e-06	0.000643175	0.494936	0.00763624		0	0.0223847	2.1452	0.466157	0.379625		1.15448e-06	0.00045683	0.379854	0.00541762		-0.0223847	0	2.1452	0.466157	0.379625		1.15448e-06	0.00045683	0.379854	0.00541762
																	-0.0217336	0.0219278	2.14531	0.466132	0.495257		2.29104e-06	0.000643176	0.495579	0.00763624		0	0.0219278	2.14519	0.466159	0.380082		1.15448e-06	0.00045683	0.380311	0.00541762		-0.0219278	0	2.14519	0.466159	0.380082		1.15448e-06	0.00045683	0.380311	0.00541762
																	-0.0212809	0.021471	2.1453	0.466134	0.495901		2.29104e-06	0.000643177	0.496222	0.00763624		0	0.021471	2.14519	0.46616	0.380539		1.15448e-06	0.00045683	0.380767	0.00541762		-0.021471	0	2.14519	0.46616	0.380539		1.15448e-06	0.00045683	0.380767	0.00541762
																	-0.0208281	0.0210142	2.14529	0.466137	0.496544		2.29104e-06	0.000643178	0.496865	0.00763624		0	0.0210142	2.14518	0.466161	0.380996		1.15448e-06	0.00045683	0.381224	0.00541762		-0.0210142	0	2.14518	0.466161	0.380996		1.15448e-06	0.00045683	0.381224	0.00541762
																	-0.0203754	0.0205573	2.14528	0.466139	0.497187		2.19193e-06	0.000643178	0.497508	0.00730589		0	0.0205573	2.14518	0.466162	0.381453		1.15448e-06	0.00045683	0.381681	0.00541762		-0.0205573	0	2.14518	0.466162	0.381453		1.15448e-06	0.00045683	0.381681	0.00541762
																	-0.0199226	0.0201005	2.14527	0.466141	0.49783		1.78354e-06	0.000643187	0.498152	0.0059446		0	0.0201005	2.14517	0.466163	0.38191		8.97533e-07	0.00045683	0.382138	0.00421186		-0.0201005	0	2.14517	0.466163	0.38191		8.97533e-07	0.00045683	0.382138	0.00421186
																	-0.0194699	0.0196437	2.14527	0.466143	0.498473		1.78354e-06	0.000643187	0.498795	0.0059446		0	0.0196437	2.14517	0.466164	0.382366		8.97533e-07	0.00045683	0.382595	0.00421186		-0.0196437	0	2.14517	0.466164	0.382366		8.97533e-07	0.00045683	0.382595	0.00421186
																	-0.0190171	0.0191868	2.14526	0.466145	0.499116		1.78354e-06	0.000643188	0.499438	0.0059446		0	0.0191868	2.14516	0.466165	0.382823		8.97533e-07	0.00045683	0.383052	0.00421186		-0.0191868	0	2.14516	0.466165	0.382823		8.97533e-07	0.00045683	0.383052	0.00421186
																	-0.0185643	0.01873	2.14525	0.466146	0.49976		1.78354e-06	0.000643188	0.500081	0.0059446		0	0.01873	2.14516	0.466166	0.38328		8.97533e-07	0.00045683	0.383508	0.00421186		-0.01873	0	2.14516	0.466166	0.38328		8.97533e-07	0.00045683	0.383508	0.00421186
																	-0.0181116	0.0182732	2.14524	0.466148	0.500403		1.78354e-06	0.000643189	0.500724	0.0059446		0	0.0182732	2.14515	0.466167	0.383737		8.97533e-07	0.00045683	0.383965	0.00421186		-0.0182732	0	2.14515	0.466167	0.383737		8.97533e-07	0.00045683	0.383965	0.00421186
																	-0.0176588	0.0178164	2.14523	0.46615	0.501046		1.78354e-06	0.00064319	0.501368	0.0059446		0	0.0178164	2.14515	0.466168	0.384194		8.97533e-07	0.00045683	0.384422	0.00421186		-0.0178164	0	2.14515	0.466168	0.384194		8.97533e-07	0.00045683	0.384422	0.00421186
																	-0.017206	0.0173595	2.14522	0.466152	0.501689		1.78355e-06	0.00064319	0.502011	0.0059446		0	0.0173595	2.14515	0.466169	0.384651		8.97533e-07	0.00045683	0.384879	0.00421186		-0.0173595	0	2.14515	0.466169	0.384651		8.97533e-07	0.00045683	0.384879	0.00421186
																	-0.0167533	0.0169027	2.14522	0.466154	0.502332		1.78355e-06	0.000643191	0.502654	0.0059446		0	0.0169027	2.14514	0.46617	0.385107		8.97533e-07	0.00045683	0.385336	0.00421186		-0.0169027	0	2.14514	0.46617	0.385107		8.97533e-07	0.00045683	0.385336	0.00421186
																	-0.0163005	0.0164459	2.14521	0.466155	0.502976		1.78355e-06	0.000643191	0.503297	0.0059446		0	0.0164459	2.14514	0.46617	0.385564		8.97533e-07	0.00045683	0.385793	0.00421186		-0.0164459	0	2.14514	0.46617	0.385564		8.97533e-07	0.00045683	0.385793	0.00421186
																	-0.0158477	0.015989	2.1452	0.466157	0.503619		1.78355e-06	0.000643192	0.50394	0.0059446		0	0.015989	2.14513	0.466171	0.386021		8.97533e-07	0.00045683	0.386249	0.00421186		-0.015989	0	2.14513	0.466171	0.386021		8.97533e-07	0.00045683	0.386249	0.00421186
																	-0.0153949	0.0155322	2.14519	0.466159	0.504262		1.70912e-06	0.000643193	0.504584	0.00569652		0	0.0155322	2.14513	0.466172	0.386478		8.97533e-07	0.00045683	0.386706	0.00421186		-0.0155322	0	2.14513	0.466172	0.386478		8.97533e-07	0.00045683	0.386706	0.00421186
																	-0.0149422	0.0150754	2.14518	0.466161	0.504905		1.2748e-06	0.000643199	0.505227	0.00424888		0	0.0150754	2.14513	0.466173	0.386935		6.40889e-07	0.00045683	0.387163	0.0030075		-0.0150754	0	2.14513	0.466173	0.386935		6.40889e-07	0.00045683	0.387163	0.0030075
																	-0.0144894	0.0146185	2.14518	0.466162	0.505548		1.2748e-06	0.000643199	0.50587	0.00424888		0	0.0146185	2.14512	0.466174	0.387392		6.40889e-07	0.00045683	0.38762	0.0030075		-0.0146185	0	2.14512	0.466174	0.387392		6.40889e-07	0.00045683	0.38762	0.0030075
																	-0.0140366	0.0141617	2.14517	0.466163	0.506192		1.2748e-06	0.000643199	0.506513	0.00424888		0	0.0141617	2.14512	0.466174	0.387848		6.40889e-07	0.00045683	0.388077	0.0030075		-0.0141617	0	2.14512	0.466174	0.387848		6.40889e-07	0.00045683	0.388077	0.0030075
																	-0.0135838	0.0137049	2.14517	0.466164	0.506835		1.2748e-06	0.0006432	0.507156	0.00424888		0	0.0137049	2.14512	0.466175	0.388305		6.40889e-07	0.00045683	0.388534	0.0030075		-0.0137049	0	2.14512	0.466175	0.388305		6.40889e-07	0.00045683	0.388534	0.0030075
																	-0.013131	0.0132481	2.14516	0.466166	0.507478		1.2748e-06	0.0006432	0.5078	0.00424888		0	0.0132481	2.14511	0.466176	0.388762		6.40889e-07	0.00045683	0.38899	0.0030075		-0.0132481	0	2.14511	0.466176	0.388762		6.40889e-07	0.00045683	0.38899	0.0030075
																	-0.0126783	0.0127912	2.14515	0.466167	0.508121		1.2748e-06	0.000643201	0.508443	0.00424888		0	0.0127912	2.14511	0.466176	0.389219		6.40889e-07	0.00045683	0.389447	0.0030075		-0.0127912	0	2.14511	0.466176	0.389219		6.40889e-07	0.00045683	0.389447	0.0030075
																	-0.0122255	0.0123344	2.14515	0.466168	0.508764		1.27481e-06	0.000643201	0.509086	0.00424888		0	0.0123344	2.14511	0.466177	0.389676		6.40889e-07	0.00045683	0.389904	0.0030075		-0.0123344	0	2.14511	0.466177	0.389676		6.40889e-07	0.00045683	0.389904	0.0030075
																	-0.0117727	0.0118776	2.14514	0.46617	0.509408		1.27481e-06	0.000643201	0.509729	0.00424888		0	0.0118776	2.14511	0.466178	0.390132		6.40889e-07	0.00045683	0.390361	0.0030075		-0.0118776	0	2.14511	0.466178	0.390132		6.40889e-07	0.00045683	0.390361	0.0030075
																	-0.0113199	0.0114207	2.14514	0.466171	0.510051		1.27481e-06	0.000643202	0.510372	0.00424888		0	0.0114207	2.1451	0.466178	0.390589		6.40889e-07	0.00045683	0.390818	0.0030075		-0.0114207	0	2.1451	0.466178	0.390589		6.40889e-07	0.00045683	0.390818	0.0030075
																	-0.0108671	0.0109639	2.14513	0.466172	0.510694		1.27481e-06	0.000643202	0.511016	0.00424888		0	0.0109639	2.1451	0.466179	0.391046		6.40889e-07	0.00045683	0.391275	0.0030075		-0.0109639	0	2.1451	0.466179	0.391046		6.40889e-07	0.00045683	0.391275	0.0030075
																	-0.0104143	0.0105071	2.14512	0.466173	0.511337		1.22514e-06	0.000643203	0.511659	0.00408335		0	0.0105071	2.1451	0.46618	0.391503		6.40889e-07	0.00045683	0.391731	0.0030075		-0.0105071	0	2.1451	0.46618	0.391503		6.40889e-07	0.00045683	0.391731	0.0030075
																	-0.00996154	0.0100503	2.14512	0.466175	0.51198		7.6521e-07	0.000643207	0.512302	0.0025504		0	0.0100503	2.14509	0.46618	0.39196		3.84452e-07	0.00045683	0.392188	0.00180412		-0.0100503	0	2.14509	0.46618	0.39196		3.84452e-07	0.00045683	0.392188	0.00180412
																	-0.00950875	0.00959342	2.14512	0.466175	0.512624		7.65211e-07	0.000643207	0.512945	0.0025504		0	0.00959342	2.14509	0.466181	0.392417		3.84452e-07	0.00045683	0.392645	0.00180412		-0.00959342	0	2.14509	0.466181	0.392417		3.84452e-07	0.00045683	0.392645	0.00180412
																	-0.00905596	0.00913659	2.14511	0.466176	0.513267		7.65211e-07	0.000643207	0.513588	0.0025504		0	0.00913659	2.14509	0.466181	0.392873		3.84452e-07	0.00045683	0.393102	0.00180412		-0.00913659	0	2.14509	0.466181	0.392873		3.84452e-07	0.00045683	0.393102	0.00180412
																	-0.00860316	0.00867976	2.14511	0.466177	0.51391		7.65211e-07	0.000643207	0.514232	0.0025504		0	0.00867976	2.14509	0.466181	0.39333		3.84452e-07	0.00045683	0.393559	0.00180412		-0.00867976	0	2.14509	0.466181	0.39333		3.84452e-07	0.00045683	0.393559	0.00180412
																	-0.00815037	0.00822293	2.1451	0.466178	0.514553		7.65211e-07	0.000643208	0.514875	0.0025504		0	0.00822293	2.14509	0.466182	0.393787		3.84452e-07	0.00045683	0.394016	0.00180412		-0.00822293	0	2.14509	0.466182	0.393787		3.84452e-07	0.00045683	0.394016	0.00180412
																	-0.00769758	0.0077661	2.1451	0.466178	0.515196		7.65212e-07	0.000643208	0.515518	0.0025504		0	0.0077661	2.14508	0.466182	0.394244		3.84452e-07	0.00045683	0.394472	0.00180412		-0.0077661	0	2.14508	0.466182	0.394244		3.84452e-07	0.00045683	0.394472	0.00180412
																	-0.00724478	0.00730927	2.1451	0.466179	0.51584		7.65212e-07	0.000643208	0.516161	0.0025504		0	0.00730927	2.14508	0.466182	0.394701		3.84452e-07	0.00045683	0.394929	0.00180412		-0.00730927	0	2.14508	0.466182	0.394701		3.84452e-07	0.00045683	0.394929	0.00180412
																	-0.00679199	0.00685244	2.14509	0.46618	0.516483		7.65212e-07	0.000643208	0.516804	0.0025504		0	0.00685244	2.14508	0.466183	0.395158		3.84452e-07	0.00045683	0.395386	0.00180412		-0.00685244	0	2.14508	0.466183	0.395158		3.84452e-07	0.00045683	0.395386	0.00180412
																	-0.00633919	0.00639561	2.14509	0.466181	0.517126		7.65213e-07	0.000643209	0.517448	0.0025504		0	0.00639561	2.14508	0.466183	0.395614		3.84452e-07	0.00045683	0.395843	0.00180412		-0.00639561	0	2.14508	0.466183	0.395614		3.84452e-07	0.00045683	0.395843	0.00180412
																	-0.00588639	0.00593878	2.14509	0.466181	0.517769		7.65213e-07	0.000643209	0.518091	0.0025504		0	0.00593878	2.14508	0.466184	0.396071		3.84452e-07	0.00045683	0.3963	0.00180412		-0.00593878	0	2.14508	0.466184	0.396071		3.84452e-07	0.00045683	0.3963	0.00180412
																	-0.0054336	0.00548196	2.14508	0.466182	0.518412		7.40365e-07	0.000643209	0.518734	0.00246758		0	0.00548196	2.14508	0.466184	0.396528		3.84452e-07	0.00045683	0.396757	0.00180412		-0.00548196	0	2.14508	0.466184	0.396528		3.84452e-07	0.00045683	0.396757	0.00180412
																	-0.0049808	0.00502513	2.14508	0.466183	0.519056		2.55124e-07	0.000643211	0.519377	0.000850307		0	0.00502513	2.14507	0.466184	0.396985		1.28137e-07	0.00045683	0.397213	0.00060131		-0.00502513	0	2.14507	0.466184	0.396985		1.28137e-07	0.00045683	0.397213	0.00060131
																	-0.004528	0.0045683	2.14508	0.466183	0.519699		2.55124e-07	0.000643211	0.52002	0.000850307		0	0.0045683	2.14507	0.466185	0.397442		1.28137e-07	0.00045683	0.39767	0.00060131		-0.0045683	0	2.14507	0.466185	0.397442		1.28137e-07	0.00045683	0.39767	0.00060131
																	-0.0040752	0.00411147	2.14508	0.466184	0.520342		2.55124e-07	0.000643211	0.520664	0.000850307		0	0.00411147	2.14507	0.466185	0.397899		1.28137e-07	0.00045683	0.398127	0.00060131		-0.00411147	0	2.14507	0.466185	0.397899		1.28137e-07	0.00045683	0.398127	0.00060131
																	-0.0036224	0.00365464	2.14508	0.466184	0.520985		2.55124e-07	0.000643211	0.521307	0.000850307		0	0.00365464	2.14507	0.466185	0.398355		1.28137e-07	0.00045683	0.398584	0.00060131		-0.00365464	0	2.14507	0.466185	0.398355		1.28137e-07	0.00045683	0.398584	0.00060131
																	-0.0031696	0.00319781	2.14508	0.466184	0.521629		2.55124e-07	0.000643212	0.52195	0.000850307		0	0.00319781	2.14507	0.466185	0.398812		1.28137e-07	0.00045683	0.399041	0.00060131		-0.00319781	0	2.14507	0.466185	0.398812		1.28137e-07	0.00045683	0.399041	0.00060131
																	-0.0027168	0.00274098	2.14507	0.466184	0.522272		2.55125e-07	0.000643212	0.522593	0.000850307		0	0.00274098	2.14507	0.466185	0.399269		1.28137e-07	0.00045683	0.399497	0.00060131		-0.00274098	0	2.14507	0.466185	0.399269		1.28137e-07	0.00045683	0.399497	0.00060131
																	-0.002264	0.00228415	2.14507	0.466185	0.522915		2.55125e-07	0.000643212	0.523237	0.000850307		0	0.00228415	2.14507	0.466185	0.399726		1.28137e-07	0.00045683	0.399954	0.00060131		-0.00228415	0	2.14507	0.466185	0.399726		1.28137e-07	0.00045683	0.399954	0.00060131
																	-0.0018112	0.00182732	2.14507	0.466185	0.523558		2.55125e-07	0.000643212	0.52388	0.000850307		0	0.00182732	2.14507	0.466185	0.400183		1.28137e-07	0.00045683	0.400411	0.00060131		-0.00182732	0	2.14507	0.466185	0.400183		1.28137e-07	0.00045683	0.400411	0.00060131
																	-0.0013584	0.00137049	2.14507	0.466185	0.524201		2.55125e-07	0.000643212	0.524523	0.000850307		0	0.00137049	2.14507	0.466185	0.40064		1.28137e-07	0.00045683	0.400868	0.00060131		-0.00137049	0	2.14507	0.466185	0.40064		1.28137e-07	0.00045683	0.400868	0.00060131
																	-0.000905601	0.000913659	2.14507	0.466185	0.524845		2.55125e-07	0.000643212	0.525166	0.000850307		0	0.000913659	2.14507	0.466186	0.401096		1.28137e-07	0.00045683	0.401325	0.00060131		-0.000913659	0	2.14507	0.466186	0.401096		1.28137e-07	0.00045683	0.401325	0.00060131
																	-0.000452801	0.00045683	2.14507	0.466186	0.525488		2.55125e-07	0.000643212	0.525809	0.000850307		0	0.00045683	2.14507	0.466186	0.401553		1.28137e-07	0.00045683	0.401782	0.00060131		-0.00045683	0	2.14507	0.466186	0.401553		1.28137e-07	0.00045683	0.401782	0.00060131
																	0	0	2.14507	0.466186	0.526131							0	-1.14258e-14	2.14507	0.466186	0.40201		0	1.14353e-14	0.40201	0		9.06924e-15	0	2.14507	0.466186	0.40201		0	9.04832e-15	0.40201	0
																												0	0	2.14507	0.466186	0.40201							0	0	2.14507	0.466186	0.40201
[truncated: 45 more columns]

## Sheet: Cond_matrix
																				0.464812	0.464764	0.464694	0.464614	0.464528	0.464436	0.46434	0.46424	0.464135	0.464027	0.463914	0.463798	0.463677	0.463552	0.463422	0.463288	0.463149	0.463006	0.462857	0.462702	0.462542	0.462376	0.462204	0.462024	0.461838	0.461644	0.461441	0.461231	0.46101	0.46078
																				0.464764	0.464742	0.464689	0.464625	0.464551	0.464472	0.464387	0.464297	0.464204	0.464106	0.464003	0.463897	0.463787	0.463673	0.463555	0.463432	0.463305	0.463174	0.463038	0.462896	0.46275	0.462598	0.462441	0.462277	0.462107	0.46193	0.461746	0.461555	0.461355	0.461146
																				0.464694	0.464689	0.46465	0.464596	0.464532	0.464461	0.464384	0.464302	0.464216	0.464125	0.46403	0.463931	0.463828	0.463722	0.463611	0.463496	0.463377	0.463254	0.463126	0.462994	0.462857	0.462715	0.462568	0.462415	0.462256	0.462091	0.461919	0.46174	0.461554	0.46136
																				0.464614	0.464625	0.464596	0.46455	0.464494	0.46443	0.46436	0.464285	0.464204	0.46412	0.464031	0.463938	0.463842	0.463741	0.463637	0.463528	0.463416	0.463299	0.463179	0.463054	0.462924	0.46279	0.462651	0.462507	0.462357	0.462202	0.46204	0.461872	0.461697	0.461515
																				0.464528	0.464551	0.464532	0.464494	0.464445	0.464388	0.464323	0.464254	0.464179	0.4641	0.464017	0.463929	0.463838	0.463743	0.463644	0.463541	0.463435	0.463324	0.46321	0.463091	0.462969	0.462841	0.462709	0.462573	0.462431	0.462284	0.462131	0.461973	0.461808	0.461636
																				0.464436	0.464472	0.464461	0.46443	0.464388	0.464336	0.464277	0.464213	0.464144	0.46407	0.463991	0.463909	0.463823	0.463732	0.463639	0.463541	0.46344	0.463335	0.463226	0.463114	0.462997	0.462876	0.462751	0.462622	0.462487	0.462348	0.462203	0.462053	0.461897	0.461735
																				0.46434	0.464387	0.464384	0.46436	0.464323	0.464277	0.464224	0.464165	0.4641	0.464031	0.463957	0.46388	0.463798	0.463713	0.463624	0.463532	0.463435	0.463336	0.463232	0.463125	0.463014	0.4629	0.462781	0.462658	0.46253	0.462398	0.462261	0.462119	0.461971	0.461818
																				0.46424	0.464297	0.464302	0.464285	0.464254	0.464213	0.464165	0.46411	0.464051	0.463986	0.463917	0.463844	0.463767	0.463686	0.463602	0.463514	0.463423	0.463328	0.46323	0.463128	0.463023	0.462914	0.462801	0.462684	0.462563	0.462437	0.462307	0.462173	0.462033	0.461888
																				0.464135	0.464204	0.464216	0.464204	0.464179	0.464144	0.4641	0.464051	0.463995	0.463935	0.46387	0.463802	0.463729	0.463653	0.463574	0.46349	0.463404	0.463314	0.463221	0.463124	0.463024	0.46292	0.462813	0.462702	0.462587	0.462469	0.462345	0.462218	0.462086	0.461949
																				0.464027	0.464106	0.464125	0.46412	0.4641	0.46407	0.464031	0.463986	0.463935	0.463879	0.463819	0.463755	0.463687	0.463615	0.46354	0.463461	0.463379	0.463294	0.463206	0.463114	0.463019	0.462921	0.462819	0.462714	0.462605	0.462493	0.462376	0.462256	0.462131	0.462002
																				0.463914	0.464003	0.46403	0.464031	0.464017	0.463991	0.463957	0.463917	0.46387	0.463819	0.463763	0.463703	0.46364	0.463572	0.463501	0.463427	0.46335	0.46327	0.463186	0.463099	0.46301	0.462917	0.46282	0.462721	0.462618	0.462512	0.462402	0.462288	0.46217	0.462048
																				0.463798	0.463897	0.463931	0.463938	0.463929	0.463909	0.46388	0.463844	0.463802	0.463755	0.463703	0.463648	0.463588	0.463525	0.463459	0.463389	0.463317	0.463241	0.463162	0.46308	0.462995	0.462908	0.462817	0.462723	0.462626	0.462525	0.462422	0.462314	0.462204	0.462089
																				0.463677	0.463787	0.463828	0.463842	0.463838	0.463823	0.463798	0.463767	0.463729	0.463687	0.46364	0.463588	0.463533	0.463475	0.463413	0.463347	0.463279	0.463208	0.463134	0.463057	0.462977	0.462895	0.462809	0.462721	0.462629	0.462535	0.462437	0.462337	0.462232	0.462125
																				0.463552	0.463673	0.463722	0.463741	0.463743	0.463732	0.463713	0.463686	0.463653	0.463615	0.463572	0.463525	0.463475	0.46342	0.463363	0.463302	0.463239	0.463172	0.463103	0.463031	0.462956	0.462878	0.462798	0.462715	0.46263	0.462541	0.462449	0.462355	0.462257	0.462156
																				0.463422	0.463555	0.463611	0.463637	0.463644	0.463639	0.463624	0.463602	0.463574	0.46354	0.463501	0.463459	0.463413	0.463363	0.46331	0.463254	0.463195	0.463133	0.463068	0.463001	0.462931	0.462859	0.462784	0.462706	0.462626	0.462543	0.462458	0.46237	0.462278	0.462184
																				0.463288	0.463432	0.463496	0.463528	0.463541	0.463541	0.463532	0.463514	0.46349	0.463461	0.463427	0.463389	0.463347	0.463302	0.463254	0.463202	0.463148	0.463091	0.463031	0.462969	0.462904	0.462837	0.462767	0.462695	0.46262	0.462543	0.462463	0.462381	0.462296	0.462209
																				0.463149	0.463305	0.463377	0.463416	0.463435	0.46344	0.463435	0.463423	0.463404	0.463379	0.46335	0.463317	0.463279	0.463239	0.463195	0.463148	0.463098	0.463046	0.462991	0.462933	0.462874	0.462812	0.462747	0.46268	0.462611	0.46254	0.462466	0.46239	0.462311	0.46223
																				0.463006	0.463174	0.463254	0.463299	0.463324	0.463335	0.463336	0.463328	0.463314	0.463294	0.46327	0.463241	0.463208	0.463172	0.463133	0.463091	0.463046	0.462998	0.462948	0.462896	0.462841	0.462784	0.462725	0.462664	0.4626	0.462534	0.462466	0.462396	0.462324	0.462249
																				0.462857	0.463038	0.463126	0.463179	0.46321	0.463226	0.463232	0.46323	0.463221	0.463206	0.463186	0.463162	0.463134	0.463103	0.463068	0.463031	0.462991	0.462948	0.462903	0.462856	0.462806	0.462754	0.4627	0.462644	0.462586	0.462526	0.462464	0.4624	0.462334	0.462265
																				0.462702	0.462896	0.462994	0.463054	0.463091	0.463114	0.463125	0.463128	0.463124	0.463114	0.463099	0.46308	0.463057	0.463031	0.463001	0.462969	0.462933	0.462896	0.462856	0.462813	0.462769	0.462722	0.462674	0.462623	0.462571	0.462516	0.46246	0.462402	0.462342	0.462279
																				0.462542	0.46275	0.462857	0.462924	0.462969	0.462997	0.463014	0.463023	0.463024	0.463019	0.46301	0.462995	0.462977	0.462956	0.462931	0.462904	0.462874	0.462841	0.462806	0.462769	0.46273	0.462688	0.462645	0.4626	0.462553	0.462504	0.462454	0.462401	0.462347	0.462291
																				0.462376	0.462598	0.462715	0.46279	0.462841	0.462876	0.4629	0.462914	0.46292	0.462921	0.462917	0.462908	0.462895	0.462878	0.462859	0.462837	0.462812	0.462784	0.462754	0.462722	0.462688	0.462653	0.462615	0.462575	0.462534	0.462491	0.462446	0.462399	0.462351	0.462301
																				0.462204	0.462441	0.462568	0.462651	0.462709	0.462751	0.462781	0.462801	0.462813	0.462819	0.46282	0.462817	0.462809	0.462798	0.462784	0.462767	0.462747	0.462725	0.4627	0.462674	0.462645	0.462615	0.462582	0.462548	0.462513	0.462475	0.462436	0.462395	0.462353	0.462309
																				0.462024	0.462277	0.462415	0.462507	0.462573	0.462622	0.462658	0.462684	0.462702	0.462714	0.462721	0.462723	0.462721	0.462715	0.462706	0.462695	0.46268	0.462664	0.462644	0.462623	0.4626	0.462575	0.462548	0.46252	0.46249	0.462458	0.462425	0.46239	0.462354	0.462316
																				0.461838	0.462107	0.462256	0.462357	0.462431	0.462487	0.46253	0.462563	0.462587	0.462605	0.462618	0.462626	0.462629	0.46263	0.462626	0.46262	0.462611	0.4626	0.462586	0.462571	0.462553	0.462534	0.462513	0.46249	0.462465	0.462439	0.462412	0.462383	0.462352	0.462321
																				0.461644	0.46193	0.462091	0.462202	0.462284	0.462348	0.462398	0.462437	0.462469	0.462493	0.462512	0.462525	0.462535	0.462541	0.462543	0.462543	0.46254	0.462534	0.462526	0.462516	0.462504	0.462491	0.462475	0.462458	0.462439	0.462419	0.462397	0.462374	0.46235	0.462324
																				0.461441	0.461746	0.461919	0.46204	0.462131	0.462203	0.462261	0.462307	0.462345	0.462376	0.462402	0.462422	0.462437	0.462449	0.462458	0.462463	0.462466	0.462466	0.462464	0.46246	0.462454	0.462446	0.462436	0.462425	0.462412	0.462397	0.462381	0.462364	0.462346	0.462326
																				0.461231	0.461555	0.46174	0.461872	0.461973	0.462053	0.462119	0.462173	0.462218	0.462256	0.462288	0.462314	0.462337	0.462355	0.46237	0.462381	0.46239	0.462396	0.4624	0.462402	0.462401	0.462399	0.462395	0.46239	0.462383	0.462374	0.462364	0.462353	0.46234	0.462327
																				0.46101	0.461355	0.461554	0.461697	0.461808	0.461897	0.461971	0.462033	0.462086	0.462131	0.46217	0.462204	0.462232	0.462257	0.462278	0.462296	0.462311	0.462324	0.462334	0.462342	0.462347	0.462351	0.462353	0.462354	0.462352	0.46235	0.462346	0.46234	0.462334	0.462326
																				0.46078	0.461146	0.46136	0.461515	0.461636	0.461735	0.461818	0.461888	0.461949	0.462002	0.462048	0.462089	0.462125	0.462156	0.462184	0.462209	0.46223	0.462249	0.462265	0.462279	0.462291	0.462301	0.462309	0.462316	0.462321	0.462324	0.462326	0.462327	0.462326	0.462324
																				0.460539	0.460928	0.461157	0.461325	0.461458	0.461567	0.461659	0.461738	0.461807	0.461868	0.461922	0.46197	0.462013	0.462052	0.462087	0.462118	0.462147	0.462172	0.462195	0.462215	0.462233	0.46225	0.462264	0.462277	0.462288	0.462297	0.462305	0.462312	0.462317	0.462321
																				0.460287	0.4607	0.460946	0.461127	0.461272	0.461391	0.461493	0.461582	0.46166	0.461729	0.461792	0.461848	0.461898	0.461945	0.461987	0.462025	0.46206	0.462093	0.462122	0.462149	0.462174	0.462196	0.462217	0.462236	0.462253	0.462269	0.462283	0.462295	0.462307	0.462316
																				0.460022	0.46046	0.460724	0.46092	0.461077	0.461208	0.461321	0.46142	0.461507	0.461585	0.461656	0.461721	0.461779	0.461833	0.461883	0.461929	0.461971	0.462011	0.462047	0.462081	0.462112	0.462142	0.462169	0.462194	0.462217	0.462239	0.462259	0.462278	0.462295	0.462311
																				0.459744	0.46021	0.460492	0.460704	0.460874	0.461018	0.461142	0.461251	0.461348	0.461436	0.461516	0.461589	0.461656	0.461719	0.461776	0.46183	0.46188	0.461926	0.46197	0.462011	0.462049	0.462085	0.462119	0.46215	0.46218	0.462208	0.462235	0.462259	0.462283	0.462305
																				0.459451	0.459947	0.460249	0.460477	0.460662	0.460819	0.460955	0.461075	0.461183	0.461281	0.46137	0.461453	0.461529	0.4616	0.461666	0.461727	0.461785	0.461839	0.46189	0.461938	0.461984	0.462026	0.462067	0.462105	0.462142	0.462176	0.462209	0.46224	0.462269	0.462297
																				0.459143	0.45967	0.459994	0.46024	0.46044	0.460611	0.460759	0.460892	0.461011	0.46112	0.461219	0.461311	0.461397	0.461477	0.461551	0.461621	0.461687	0.461749	0.461808	0.461864	0.461916	0.461966	0.462014	0.462059	0.462102	0.462143	0.462182	0.462219	0.462254	0.462288
																				0.458819	0.459378	0.459726	0.45999	0.460208	0.460393	0.460556	0.460701	0.460832	0.460952	0.461062	0.461165	0.46126	0.461349	0.461433	0.461512	0.461586	0.461657	0.461723	0.461787	0.461847	0.461904	0.461959	0.462011	0.46206	0.462108	0.462153	0.462197	0.462239	0.462279
																				0.458476	0.459071	0.459444	0.459729	0.459964	0.460165	0.460342	0.460501	0.460645	0.460777	0.460899	0.461013	0.461119	0.461218	0.461311	0.461399	0.461482	0.461561	0.461636	0.461708	0.461775	0.46184	0.461902	0.461961	0.462018	0.462072	0.462124	0.462174	0.462222	0.462268
																				0.458113	0.458747	0.459146	0.459453	0.459707	0.459926	0.460119	0.460293	0.460451	0.460596	0.46073	0.460855	0.460972	0.461081	0.461185	0.461282	0.461375	0.461463	0.461546	0.461626	0.461702	0.461774	0.461844	0.46191	0.461974	0.462035	0.462094	0.46215	0.462204	0.462257
																				0.457728	0.458404	0.458832	0.459163	0.459438	0.459676	0.459886	0.460075	0.460247	0.460406	0.460553	0.460691	0.460819	0.46094	0.461054	0.461162	0.461264	0.461361	0.461454	0.461542	0.461626	0.461707	0.461784	0.461857	0.461928	0.461996	0.462062	0.462125	0.462186	0.462244
																				0.45732	0.458041	0.458501	0.458857	0.459155	0.459412	0.459641	0.459847	0.460035	0.460209	0.46037	0.46052	0.460661	0.460794	0.460919	0.461037	0.46115	0.461256	0.461358	0.461455	0.461548	0.461637	0.461722	0.461803	0.461882	0.461957	0.462029	0.462099	0.462166	0.462231
																				0.456886	0.457656	0.45815	0.458535	0.458856	0.459136	0.459384	0.459608	0.459813	0.460003	0.460178	0.460343	0.460497	0.460642	0.460779	0.460908	0.461031	0.461148	0.46126	0.461366	0.461468	0.461565	0.461658	0.461747	0.461833	0.461916	0.461995	0.462071	0.462145	0.462216
																				0.456424	0.457247	0.457778	0.458193	0.458541	0.458844	0.459114	0.459358	0.459581	0.459787	0.459979	0.460158	0.460326	0.460484	0.460633	0.460775	0.460909	0.461037	0.461158	0.461274	0.461385	0.461491	0.461593	0.46169	0.461784	0.461873	0.46196	0.462043	0.462123	0.462201
																				0.455932	0.456812	0.457383	0.457832	0.458209	0.458537	0.45883	0.459095	0.459338	0.459562	0.459771	0.459966	0.460149	0.460321	0.460483	0.460637	0.460783	0.460922	0.461054	0.46118	0.4613	0.461415	0.461525	0.461631	0.461732	0.46183	0.461923	0.462014	0.462101	0.462184
																				0.455405	0.456349	0.456964	0.457449	0.457857	0.458213	0.458531	0.458819	0.459083	0.459327	0.459554	0.459766	0.459964	0.460151	0.460327	0.460494	0.460653	0.460803	0.460946	0.461083	0.461213	0.461337	0.461456	0.46157	0.46168	0.461785	0.461886	0.461983	0.462077	0.462167
																				0.454842	0.455854	0.456518	0.457042	0.457485	0.457871	0.458217	0.45853	0.458816	0.459081	0.459327	0.459557	0.459772	0.459975	0.460166	0.460347	0.460518	0.460681	0.460835	0.460982	0.461123	0.461257	0.461385	0.461508	0.461626	0.461739	0.461847	0.461952	0.462052	0.462149
																				0.454237	0.455325	0.456042	0.45661	0.45709	0.45751	0.457885	0.458225	0.458536	0.458824	0.459091	0.45934	0.459573	0.459792	0.459999	0.460194	0.460379	0.460554	0.460721	0.460879	0.46103	0.461174	0.461312	0.461444	0.46157	0.461691	0.461807	0.461919	0.462026	0.46213
																				0.453587	0.454758	0.455534	0.45615	0.456671	0.457127	0.457535	0.457904	0.458242	0.458554	0.458844	0.459113	0.459366	0.459603	0.459826	0.460036	0.460236	0.460424	0.460603	0.460773	0.460935	0.46109	0.461237	0.461378	0.461513	0.461642	0.461766	0.461886	0.462	0.46211
																				0.452886	0.45415	0.45499	0.455659	0.456226	0.456722	0.457165	0.457567	0.457934	0.458272	0.458585	0.458877	0.45915	0.459406	0.459647	0.459873	0.460087	0.46029	0.460482	0.460664	0.460838	0.461003	0.461161	0.461311	0.461455	0.461592	0.461724	0.461851	0.461972	0.462089
																				0.452129	0.453495	0.454408	0.455136	0.455753	0.456293	0.456775	0.457211	0.457609	0.457976	0.458316	0.458631	0.458926	0.459202	0.459461	0.459705	0.459935	0.460152	0.460358	0.460553	0.460738	0.460914	0.461082	0.461242	0.461395	0.461541	0.461681	0.461815	0.461944	0.462068
																				0.45131	0.45279	0.453784	0.454577	0.455249	0.455837	0.456362	0.456836	0.457269	0.457666	0.458034	0.458375	0.458693	0.45899	0.459269	0.45953	0.459777	0.46001	0.46023	0.460438	0.460635	0.460823	0.461002	0.461172	0.461334	0.461489	0.461637	0.461779	0.461915	0.462045
																				0.450422	0.452029	0.453112	0.453978	0.454712	0.455353	0.455925	0.456441	0.456911	0.457342	0.457739	0.458108	0.458451	0.45877	0.45907	0.459351	0.459615	0.459863	0.460098	0.46032	0.46053	0.46073	0.460919	0.4611	0.461271	0.461435	0.461592	0.461741	0.461885	0.462022
																				0.449455	0.451205	0.452389	0.453336	0.454138	0.454839	0.455462	0.456024	0.456534	0.457001	0.457432	0.45783	0.458199	0.458543	0.458864	0.459165	0.459448	0.459713	0.459963	0.4602	0.460423	0.460635	0.460836	0.461026	0.461208	0.461381	0.461546	0.461703	0.461854	0.461998
																				0.4484	0.450312	0.451609	0.452647	0.453526	0.454292	0.454972	0.455584	0.456138	0.456645	0.45711	0.45754	0.457938	0.458307	0.458652	0.458974	0.459276	0.459559	0.459825	0.460076	0.460313	0.460538	0.46075	0.460951	0.461143	0.461325	0.461499	0.461664	0.461822	0.461973
																				0.447247	0.449342	0.450767	0.451907	0.452871	0.45371	0.454453	0.455119	0.455722	0.456272	0.456775	0.457238	0.457667	0.458064	0.458433	0.458777	0.459099	0.459401	0.459684	0.45995	0.460202	0.460439	0.460663	0.460875	0.461077	0.461268	0.461451	0.461624	0.46179	0.461948
																				0.445981	0.448284	0.449855	0.451111	0.452171	0.453091	0.453903	0.45463	0.455285	0.455881	0.456425	0.456925	0.457386	0.457812	0.458207	0.458575	0.458918	0.459239	0.45954	0.459822	0.460088	0.460338	0.460574	0.460798	0.46101	0.461211	0.461402	0.461584	0.461757	0.461922
																				0.444587	0.447129	0.448867	0.450253	0.451421	0.452431	0.45332	0.454113	0.454827	0.455473	0.456061	0.4566	0.457095	0.457552	0.457975	0.458367	0.458733	0.459074	0.459392	0.459691	0.459972	0.460236	0.460485	0.46072	0.460942	0.461153	0.461353	0.461543	0.461724	0.461896
																				0.443048	0.445865	0.447793	0.449328	0.450617	0.451728	0.452703	0.453569	0.454345	0.455046	0.455682	0.456263	0.456795	0.457285	0.457736	0.458155	0.458543	0.458905	0.459243	0.459558	0.459854	0.460132	0.460394	0.460641	0.460874	0.461094	0.461303	0.461501	0.46169	0.461869
																				0.441342	0.444479	0.446625	0.44833	0.449756	0.45098	0.45205	0.452996	0.453841	0.454601	0.455289	0.455914	0.456485	0.457009	0.457492	0.457937	0.45835	0.458733	0.45909	0.459424	0.459735	0.460028	0.460302	0.460561	0.460805	0.461035	0.461253	0.46146	0.461656	0.461842
																				0.439443	0.442952	0.445352	0.447252	0.448832	0.450184	0.451359	0.452394	0.453314	0.454138	0.454881	0.455554	0.456167	0.456727	0.457242	0.457716	0.458154	0.458559	0.458936	0.459288	0.459616	0.459922	0.46021	0.460481	0.460736	0.460976	0.461203	0.461418	0.461621	0.461815
																				0.437321	0.441268	0.443963	0.446085	0.447843	0.449336	0.450629	0.451761	0.452763	0.453657	0.454459	0.455183	0.45584	0.456439	0.456987	0.45749	0.457954	0.458383	0.458781	0.45915	0.459495	0.459817	0.460118	0.4604	0.460666	0.460916	0.461153	0.461376	0.461587	0.461787
																				0.434937	0.439404	0.442444	0.444824	0.446782	0.448436	0.449859	0.451098	0.45219	0.453158	0.454023	0.454802	0.455506	0.456145	0.456728	0.457262	0.457753	0.458206	0.458624	0.459013	0.459374	0.459711	0.460025	0.46032	0.460597	0.460857	0.461102	0.461334	0.461553	0.46176
																				0.432244	0.437333	0.44078	0.44346	0.445647	0.447482	0.449049	0.450406	0.451594	0.452643	0.453576	0.454412	0.455165	0.455846	0.456466	0.457032	0.45755	0.458027	0.458467	0.458875	0.459253	0.459605	0.459933	0.46024	0.460528	0.460798	0.461052	0.461292	0.461518	0.461732
																				0.42918	0.435026	0.438957	0.441986	0.444435	0.446473	0.4482	0.449685	0.450978	0.452113	0.453118	0.454015	0.454819	0.455544	0.456201	0.4568	0.457347	0.457849	0.458311	0.458738	0.459133	0.4595	0.459842	0.460161	0.46046	0.46074	0.461003	0.461251	0.461484	0.461705
																				0.425671	0.432448	0.436961	0.440396	0.443145	0.445409	0.447313	0.448938	0.450343	0.45157	0.452652	0.453611	0.454469	0.455239	0.455936	0.456568	0.457144	0.457671	0.458155	0.458601	0.459014	0.459396	0.459752	0.460083	0.460393	0.460683	0.460955	0.46121	0.461451	0.461678
																				0.421635	0.42957	0.43478	0.438689	0.441777	0.444294	0.446391	0.448168	0.449693	0.451018	0.452179	0.453204	0.454117	0.454934	0.45567	0.456337	0.456942	0.457495	0.458001	0.458467	0.458897	0.459294	0.459663	0.460007	0.460327	0.460626	0.460907	0.46117	0.461418	0.461652
																				0.416992	0.426369	0.432409	0.436864	0.440335	0.443132	0.445439	0.447378	0.449031	0.450458	0.451702	0.452796	0.453766	0.454631	0.455407	0.456108	0.456743	0.457321	0.45785	0.458335	0.458782	0.459195	0.459577	0.459932	0.460263	0.460572	0.460861	0.461132	0.461386	0.461626
																				0.411689	0.422832	0.429849	0.434928	0.438826	0.441928	0.444463	0.446574	0.448362	0.449896	0.451225	0.45239	0.453417	0.454331	0.455148	0.455883	0.456548	0.457152	0.457703	0.458207	0.458671	0.459098	0.459493	0.45986	0.460201	0.460519	0.460816	0.461094	0.461356	0.461601
																				0.405658	0.418933	0.427093	0.432883	0.437256	0.440692	0.443469	0.445763	0.447691	0.449334	0.450752	0.451988	0.453074	0.454036	0.454894	0.455664	0.456358	0.456987	0.45756	0.458083	0.458563	0.459005	0.459413	0.45979	0.460141	0.460468	0.460773	0.461058	0.461326	0.461577
																				0.39843	0.414557	0.42412	0.430733	0.435634	0.439431	0.442466	0.444951	0.447024	0.44878	0.450287	0.451594	0.452739	0.45375	0.454648	0.455452	0.456175	0.456829	0.457422	0.457964	0.45846	0.458916	0.459336	0.459724	0.460085	0.46042	0.460732	0.461024	0.461298	0.461555
																				0.389144	0.409594	0.420922	0.428487	0.433975	0.43816	0.441466	0.444147	0.446367	0.448237	0.449834	0.451213	0.452416	0.453474	0.454412	0.455249	0.456	0.456678	0.457292	0.457851	0.458362	0.458831	0.459263	0.459662	0.460031	0.460374	0.460694	0.460992	0.461271	0.461533
																				0.379299	0.404224	0.417532	0.426172	0.4323	0.436895	0.440481	0.443362	0.44573	0.447713	0.449398	0.450847	0.452107	0.453212	0.454188	0.455057	0.455835	0.456536	0.457169	0.457745	0.458271	0.458752	0.459195	0.459603	0.459981	0.460332	0.460658	0.460962	0.461247	0.461513
																				0.362116	0.397655	0.413907	0.423826	0.430642	0.43566	0.439526	0.442606	0.445121	0.447214	0.448985	0.450503	0.451817	0.452966	0.453979	0.454878	0.455682	0.456404	0.457056	0.457647	0.458186	0.45868	0.459132	0.45955	0.459935	0.460293	0.460625	0.460935	0.461224	0.461495
																				0.347237	0.391419	0.410417	0.421564	0.429048	0.434477	0.438618	0.441891	0.444547	0.446747	0.448601	0.450183	0.451549	0.45274	0.453787	0.454714	0.455542	0.456283	0.456952	0.457558	0.45811	0.458614	0.459076	0.459501	0.459894	0.460258	0.460595	0.46091	0.461204	0.461478
																				0.332393	0.385989	0.407179	0.419421	0.427539	0.433365	0.43777	0.441228	0.444019	0.44632	0.44825	0.449892	0.451306	0.452535	0.453614	0.454567	0.455416	0.456176	0.45686	0.457479	0.458042	0.458555	0.459026	0.459458	0.459857	0.460226	0.460569	0.460888	0.461185	0.461464
																				0.2117	0.375684	0.403349	0.417268	0.426108	0.432337	0.436998	0.44063	0.443545	0.445938	0.447939	0.449636	0.451092	0.452356	0.453463	0.454439	0.455307	0.456083	0.45678	0.45741	0.457983	0.458504	0.458982	0.459421	0.459825	0.460199	0.460546	0.460869	0.46117	0.461451
																				0.19103	0.368846	0.400017	0.415311	0.424819	0.431424	0.43632	0.44011	0.443137	0.445612	0.447674	0.449418	0.450912	0.452205	0.453336	0.454332	0.455215	0.456004	0.456713	0.457353	0.457933	0.458462	0.458946	0.45939	0.459799	0.460177	0.460528	0.460853	0.461157	0.46144
																				0.183155	0.363984	0.397427	0.413714	0.423751	0.430667	0.435761	0.439684	0.442804	0.445347	0.44746	0.449243	0.450767	0.452085	0.453234	0.454246	0.455143	0.455942	0.45666	0.457308	0.457895	0.458429	0.458917	0.459366	0.459778	0.46016	0.460513	0.460841	0.461147	0.461432
																				0.179319	0.360719	0.395607	0.412553	0.422959	0.430102	0.435344	0.439368	0.442559	0.445153	0.447303	0.449115	0.450662	0.451997	0.453161	0.454184	0.45509	0.455898	0.456622	0.457275	0.457866	0.458405	0.458897	0.459348	0.459763	0.460147	0.460502	0.460832	0.461139	0.461426
																				0.177447	0.358836	0.39453	0.411853	0.422475	0.429755	0.435087	0.439173	0.442407	0.445033	0.447207	0.449037	0.450597	0.451943	0.453116	0.454146	0.455058	0.45587	0.456599	0.457255	0.45785	0.45839	0.458884	0.459337	0.459754	0.460139	0.460496	0.460827	0.461135	0.461423
																				0.176878	0.35822	0.394174	0.41162	0.422312	0.429637	0.435	0.439107	0.442356	0.444993	0.447175	0.449011	0.450576	0.451926	0.453101	0.454133	0.455047	0.455861	0.456591	0.457248	0.457844	0.458385	0.45888	0.459334	0.459751	0.460137	0.460493	0.460825	0.461133	0.461421
																				0.177447	0.358836	0.39453	0.411853	0.422475	0.429755	0.435087	0.439173	0.442407	0.445033	0.447207	0.449037	0.450597	0.451943	0.453116	0.454146	0.455058	0.45587	0.456599	0.457255	0.45785	0.45839	0.458884	0.459337	0.459754	0.460139	0.460496	0.460827	0.461135	0.461423
																				0.179319	0.360719	0.395607	0.412553	0.422959	0.430102	0.435344	0.439368	0.442559	0.445153	0.447303	0.449115	0.450662	0.451997	0.453161	0.454184	0.45509	0.455898	0.456622	0.457275	0.457866	0.458405	0.458897	0.459348	0.459763	0.460147	0.460502	0.460832	0.461139	0.461426
																				0.183155	0.363984	0.397427	0.413714	0.423751	0.430667	0.435761	0.439684	0.442804	0.445347	0.44746	0.449243	0.450767	0.452085	0.453234	0.454246	0.455143	0.455942	0.45666	0.457308	0.457895	0.458429	0.458917	0.459366	0.459778	0.46016	0.460513	0.460841	0.461147	0.461432
																				0.19103	0.368846	0.400017	0.415311	0.424819	0.431424	0.43632	0.44011	0.443137	0.445612	0.447674	0.449418	0.450912	0.452205	0.453336	0.454332	0.455215	0.456004	0.456713	0.457353	0.457933	0.458462	0.458946	0.45939	0.459799	0.460177	0.460528	0.460853	0.461157	0.46144
																				0.2117	0.375684	0.403349	0.417268	0.426108	0.432337	0.436998	0.44063	0.443545	0.445938	0.447939	0.449636	0.451092	0.452356	0.453463	0.454439	0.455307	0.456083	0.45678	0.45741	0.457983	0.458504	0.458982	0.459421	0.459825	0.460199	0.460546	0.460869	0.46117	0.461451
																				0.332393	0.385989	0.407179	0.419421	0.427539	0.433365	0.43777	0.441228	0.444019	0.44632	0.44825	0.449892	0.451306	0.452535	0.453614	0.454567	0.455416	0.456176	0.45686	0.457479	0.458042	0.458555	0.459026	0.459458	0.459857	0.460226	0.460569	0.460888	0.461185	0.461464
																				0.347237	0.391419	0.410417	0.421564	0.429048	0.434477	0.438618	0.441891	0.444547	0.446747	0.448601	0.450183	0.451549	0.45274	0.453787	0.454714	0.455542	0.456283	0.456952	0.457558	0.45811	0.458614	0.459076	0.459501	0.459894	0.460258	0.460595	0.46091	0.461204	0.461478
																				0.362116	0.397655	0.413907	0.423826	0.430642	0.43566	0.439526	0.442606	0.445121	0.447214	0.448985	0.450503	0.451817	0.452966	0.453979	0.454878	0.455682	0.456404	0.457056	0.457647	0.458186	0.45868	0.459132	0.45955	0.459935	0.460293	0.460625	0.460935	0.461224	0.461495
																				0.379299	0.404224	0.417532	0.426172	0.4323	0.436895	0.440481	0.443362	0.44573	0.447713	0.449398	0.450847	0.452107	0.453212	0.454188	0.455057	0.455835	0.456536	0.457169	0.457745	0.458271	0.458752	0.459195	0.459603	0.459981	0.460332	0.460658	0.460962	0.461247	0.461513
																				0.389144	0.409594	0.420922	0.428487	0.433975	0.43816	0.441466	0.444147	0.446367	0.448237	0.449834	0.451213	0.452416	0.453474	0.454412	0.455249	0.456	0.456678	0.457292	0.457851	0.458362	0.458831	0.459263	0.459662	0.460031	0.460374	0.460694	0.460992	0.461271	0.461533
																				0.39843	0.414557	0.42412	0.430733	0.435634	0.439431	0.442466	0.444951	0.447024	0.44878	0.450287	0.451594	0.452739	0.45375	0.454648	0.455452	0.456175	0.456829	0.457422	0.457964	0.45846	0.458916	0.459336	0.459724	0.460085	0.46042	0.460732	0.461024	0.461298	0.461555
																				0.405658	0.418933	0.427093	0.432883	0.437256	0.440692	0.443469	0.445763	0.447691	0.449334	0.450752	0.451988	0.453074	0.454036	0.454894	0.455664	0.456358	0.456987	0.45756	0.458083	0.458563	0.459005	0.459413	0.45979	0.460141	0.460468	0.460773	0.461058	0.461326	0.461577
																				0.411689	0.422832	0.429849	0.434928	0.438826	0.441928	0.444463	0.446574	0.448362	0.449896	0.451225	0.45239	0.453417	0.454331	0.455148	0.455883	0.456548	0.457152	0.457703	0.458207	0.458671	0.459098	0.459493	0.45986	0.460201	0.460519	0.460816	0.461094	0.461356	0.461601
																				0.416992	0.426369	0.432409	0.436864	0.440335	0.443132	0.445439	0.447378	0.449031	0.450458	0.451702	0.452796	0.453766	0.454631	0.455407	0.456108	0.456743	0.457321	0.45785	0.458335	0.458782	0.459195	0.459577	0.459932	0.460263	0.460572	0.460861	0.461132	0.461386	0.461626
																				0.421635	0.42957	0.43478	0.438689	0.441777	0.444294	0.446391	0.448168	0.449693	0.451018	0.452179	0.453204	0.454117	0.454934	0.45567	0.456337	0.456942	0.457495	0.458001	0.458467	0.458897	0.459294	0.459663	0.460007	0.460327	0.460626	0.460907	0.46117	0.461418	0.461652
																				0.425671	0.432448	0.436961	0.440396	0.443145	0.445409	0.447313	0.448938	0.450343	0.45157	0.452652	0.453611	0.454469	0.455239	0.455936	0.456568	0.457144	0.457671	0.458155	0.458601	0.459014	0.459396	0.459752	0.460083	0.460393	0.460683	0.460955	0.46121	0.461451	0.461678
																				0.42918	0.435026	0.438957	0.441986	0.444435	0.446473	0.4482	0.449685	0.450978	0.452113	0.453118	0.454015	0.454819	0.455544	0.456201	0.4568	0.457347	0.457849	0.458311	0.458738	0.459133	0.4595	0.459842	0.460161	0.46046	0.46074	0.461003	0.461251	0.461484	0.461705
																				0.432244	0.437333	0.44078	0.44346	0.445647	0.447482	0.449049	0.450406	0.451594	0.452643	0.453576	0.454412	0.455165	0.455846	0.456466	0.457032	0.45755	0.458027	0.458467	0.458875	0.459253	0.459605	0.459933	0.46024	0.460528	0.460798	0.461052	0.461292	0.461518	0.461732
																				0.434937	0.439404	0.442444	0.444824	0.446782	0.448436	0.449859	0.451098	0.45219	0.453158	0.454023	0.454802	0.455506	0.456145	0.456728	0.457262	0.457753	0.458206	0.458624	0.459013	0.459374	0.459711	0.460025	0.46032	0.460597	0.460857	0.461102	0.461334	0.461553	0.46176
																				0.437321	0.441268	0.443963	0.446085	0.447843	0.449336	0.450629	0.451761	0.452763	0.453657	0.454459	0.455183	0.45584	0.456439	0.456987	0.45749	0.457954	0.458383	0.458781	0.45915	0.459495	0.459817	0.460118	0.4604	0.460666	0.460916	0.461153	0.461376	0.461587	0.461787
																				0.439443	0.442952	0.445352	0.447252	0.448832	0.450184	0.451359	0.452394	0.453314	0.454138	0.454881	0.455554	0.456167	0.456727	0.457242	0.457716	0.458154	0.458559	0.458936	0.459288	0.459616	0.459922	0.46021	0.460481	0.460736	0.460976	0.461203	0.461418	0.461621	0.461815
																				0.441342	0.444479	0.446625	0.44833	0.449756	0.45098	0.45205	0.452996	0.453841	0.454601	0.455289	0.455914	0.456485	0.457009	0.457492	0.457937	0.45835	0.458733	0.45909	0.459424	0.459735	0.460028	0.460302	0.460561	0.460805	0.461035	0.461253	0.46146	0.461656	0.461842
																				0.443048	0.445865	0.447793	0.449328	0.450617	0.451728	0.452703	0.453569	0.454345	0.455046	0.455682	0.456263	0.456795	0.457285	0.457736	0.458155	0.458543	0.458905	0.459243	0.459558	0.459854	0.460132	0.460394	0.460641	0.460874	0.461094	0.461303	0.461501	0.46169	0.461869
																				0.444587	0.447129	0.448867	0.450253	0.451421	0.452431	0.45332	0.454113	0.454827	0.455473	0.456061	0.4566	0.457095	0.457552	0.457975	0.458367	0.458733	0.459074	0.459392	0.459691	0.459972	0.460236	0.460485	0.46072	0.460942	0.461153	0.461353	0.461543	0.461724	0.461896
																				0.445981	0.448284	0.449855	0.451111	0.452171	0.453091	0.453903	0.45463	0.455285	0.455881	0.456425	0.456925	0.457386	0.457812	0.458207	0.458575	0.458918	0.459239	0.45954	0.459822	0.460088	0.460338	0.460574	0.460798	0.46101	0.461211	0.461402	0.461584	0.461757	0.461922
																				0.447247	0.449342	0.450767	0.451907	0.452871	0.45371	0.454453	0.455119	0.455722	0.456272	0.456775	0.457238	0.457667	0.458064	0.458433	0.458777	0.459099	0.459401	0.459684	0.45995	0.460202	0.460439	0.460663	0.460875	0.461077	0.461268	0.461451	0.461624	0.46179	0.461948
																				0.4484	0.450312	0.451609	0.452647	0.453526	0.454292	0.454972	0.455584	0.456138	0.456645	0.45711	0.45754	0.457938	0.458307	0.458652	0.458974	0.459276	0.459559	0.459825	0.460076	0.460313	0.460538	0.46075	0.460951	0.461143	0.461325	0.461499	0.461664	0.461822	0.461973
																				0.449455	0.451205	0.452389	0.453336	0.454138	0.454839	0.455462	0.456024	0.456534	0.457001	0.457432	0.45783	0.458199	0.458543	0.458864	0.459165	0.459448	0.459713	0.459963	0.4602	0.460423	0.460635	0.460836	0.461026	0.461208	0.461381	0.461546	0.461703	0.461854	0.461998
																				0.450422	0.452029	0.453112	0.453978	0.454712	0.455353	0.455925	0.456441	0.456911	0.457342	0.457739	0.458108	0.458451	0.45877	0.45907	0.459351	0.459615	0.459863	0.460098	0.46032	0.46053	0.46073	0.460919	0.4611	0.461271	0.461435	0.461592	0.461741	0.461885	0.462022
																				0.45131	0.45279	0.453784	0.454577	0.455249	0.455837	0.456362	0.456836	0.457269	0.457666	0.458034	0.458375	0.458693	0.45899	0.459269	0.45953	0.459777	0.46001	0.46023	0.460438	0.460635	0.460823	0.461002	0.461172	0.461334	0.461489	0.461637	0.461779	0.461915	0.462045
																				0.452129	0.453495	0.454408	0.455136	0.455753	0.456293	0.456775	0.457211	0.457609	0.457976	0.458316	0.458631	0.458926	0.459202	0.459461	0.459705	0.459935	0.460152	0.460358	0.460553	0.460738	0.460914	0.461082	0.461242	0.461395	0.461541	0.461681	0.461815	0.461944	0.462068
																				0.452886	0.45415	0.45499	0.455659	0.456226	0.456722	0.457165	0.457567	0.457934	0.458272	0.458585	0.458877	0.45915	0.459406	0.459647	0.459873	0.460087	0.46029	0.460482	0.460664	0.460838	0.461003	0.461161	0.461311	0.461455	0.461592	0.461724	0.461851	0.461972	0.462089
																				0.453587	0.454758	0.455534	0.45615	0.456671	0.457127	0.457535	0.457904	0.458242	0.458554	0.458844	0.459113	0.459366	0.459603	0.459826	0.460036	0.460236	0.460424	0.460603	0.460773	0.460935	0.46109	0.461237	0.461378	0.461513	0.461642	0.461766	0.461886	0.462	0.46211
																				0.454237	0.455325	0.456042	0.45661	0.45709	0.45751	0.457885	0.458225	0.458536	0.458824	0.459091	0.45934	0.459573	0.459792	0.459999	0.460194	0.460379	0.460554	0.460721	0.460879	0.46103	0.461174	0.461312	0.461444	0.46157	0.461691	0.461807	0.461919	0.462026	0.46213
																				0.454842	0.455854	0.456518	0.457042	0.457485	0.457871	0.458217	0.45853	0.458816	0.459081	0.459327	0.459557	0.459772	0.459975	0.460166	0.460347	0.460518	0.460681	0.460835	0.460982	0.461123	0.461257	0.461385	0.461508	0.461626	0.461739	0.461847	0.461952	0.462052	0.462149
																				0.455405	0.456349	0.456964	0.457449	0.457857	0.458213	0.458531	0.458819	0.459083	0.459327	0.459554	0.459766	0.459964	0.460151	0.460327	0.460494	0.460653	0.460803	0.460946	0.461083	0.461213	0.461337	0.461456	0.46157	0.46168	0.461785	0.461886	0.461983	0.462077	0.462167
																				0.455932	0.456812	0.457383	0.457832	0.458209	0.458537	0.45883	0.459095	0.459338	0.459562	0.459771	0.459966	0.460149	0.460321	0.460483	0.460637	0.460783	0.460922	0.461054	0.46118	0.4613	0.461415	0.461525	0.461631	0.461732	0.46183	0.461923	0.462014	0.462101	0.462184
																				0.456424	0.457247	0.457778	0.458193	0.458541	0.458844	0.459114	0.459358	0.459581	0.459787	0.459979	0.460158	0.460326	0.460484	0.460633	0.460775	0.460909	0.461037	0.461158	0.461274	0.461385	0.461491	0.461593	0.46169	0.461784	0.461873	0.46196	0.462043	0.462123	0.462201
																				0.456886	0.457656	0.45815	0.458535	0.458856	0.459136	0.459384	0.459608	0.459813	0.460003	0.460178	0.460343	0.460497	0.460642	0.460779	0.460908	0.461031	0.461148	0.46126	0.461366	0.461468	0.461565	0.461658	0.461747	0.461833	0.461916	0.461995	0.462071	0.462145	0.462216
																				0.45732	0.458041	0.458501	0.458857	0.459155	0.459412	0.459641	0.459847	0.460035	0.460209	0.46037	0.46052	0.460661	0.460794	0.460919	0.461037	0.46115	0.461256	0.461358	0.461455	0.461548	0.461637	0.461722	0.461803	0.461882	0.461957	0.462029	0.462099	0.462166	0.462231
																				0.457728	0.458404	0.458832	0.459163	0.459438	0.459676	0.459886	0.460075	0.460247	0.460406	0.460553	0.460691	0.460819	0.46094	0.461054	0.461162	0.461264	0.461361	0.461454	0.461542	0.461626	0.461707	0.461784	0.461857	0.461928	0.461996	0.462062	0.462125	0.462186	0.462244
																				0.458113	0.458747	0.459146	0.459453	0.459707	0.459926	0.460119	0.460293	0.460451	0.460596	0.46073	0.460855	0.460972	0.461081	0.461185	0.461282	0.461375	0.461463	0.461546	0.461626	0.461702	0.461774	0.461844	0.46191	0.461974	0.462035	0.462094	0.46215	0.462204	0.462257
																				0.458476	0.459071	0.459444	0.459729	0.459964	0.460165	0.460342	0.460501	0.460645	0.460777	0.460899	0.461013	0.461119	0.461218	0.461311	0.461399	0.461482	0.461561	0.461636	0.461708	0.461775	0.46184	0.461902	0.461961	0.462018	0.462072	0.462124	0.462174	0.462222	0.462268
																				0.458819	0.459378	0.459726	0.45999	0.460208	0.460393	0.460556	0.460701	0.460832	0.460952	0.461062	0.461165	0.46126	0.461349	0.461433	0.461512	0.461586	0.461657	0.461723	0.461787	0.461847	0.461904	0.461959	0.462011	0.46206	0.462108	0.462153	0.462197	0.462239	0.462279
																				0.459143	0.45967	0.459994	0.46024	0.46044	0.460611	0.460759	0.460892	0.461011	0.46112	0.461219	0.461311	0.461397	0.461477	0.461551	0.461621	0.461687	0.461749	0.461808	0.461864	0.461916	0.461966	0.462014	0.462059	0.462102	0.462143	0.462182	0.462219	0.462254	0.462288
																				0.459451	0.459947	0.460249	0.460477	0.460662	0.460819	0.460955	0.461075	0.461183	0.461281	0.46137	0.461453	0.461529	0.4616	0.461666	0.461727	0.461785	0.461839	0.46189	0.461938	0.461984	0.462026	0.462067	0.462105	0.462142	0.462176	0.462209	0.46224	0.462269	0.462297
																				0.459744	0.46021	0.460492	0.460704	0.460874	0.461018	0.461142	0.461251	0.461348	0.461436	0.461516	0.461589	0.461656	0.461719	0.461776	0.46183	0.46188	0.461926	0.46197	0.462011	0.462049	0.462085	0.462119	0.46215	0.46218	0.462208	0.462235	0.462259	0.462283	0.462305
																				0.460022	0.46046	0.460724	0.46092	0.461077	0.461208	0.461321	0.46142	0.461507	0.461585	0.461656	0.461721	0.461779	0.461833	0.461883	0.461929	0.461971	0.462011	0.462047	0.462081	0.462112	0.462142	0.462169	0.462194	0.462217	0.462239	0.462259	0.462278	0.462295	0.462311
																				0.460287	0.4607	0.460946	0.461127	0.461272	0.461391	0.461493	0.461582	0.46166	0.461729	0.461792	0.461848	0.461898	0.461945	0.461987	0.462025	0.46206	0.462093	0.462122	0.462149	0.462174	0.462196	0.462217	0.462236	0.462253	0.462269	0.462283	0.462295	0.462307	0.462316
																				0.460539	0.460928	0.461157	0.461325	0.461458	0.461567	0.461659	0.461738	0.461807	0.461868	0.461922	0.46197	0.462013	0.462052	0.462087	0.462118	0.462147	0.462172	0.462195	0.462215	0.462233	0.46225	0.462264	0.462277	0.462288	0.462297	0.462305	0.462312	0.462317	0.462321
																				0.46078	0.461146	0.46136	0.461515	0.461636	0.461735	0.461818	0.461888	0.461949	0.462002	0.462048	0.462089	0.462125	0.462156	0.462184	0.462209	0.46223	0.462249	0.462265	0.462279	0.462291	0.462301	0.462309	0.462316	0.462321	0.462324	0.462326	0.462327	0.462326	0.462324
																				0.46101	0.461355	0.461554	0.461697	0.461808	0.461897	0.461971	0.462033	0.462086	0.462131	0.46217	0.462204	0.462232	0.462257	0.462278	0.462296	0.462311	0.462324	0.462334	0.462342	0.462347	0.462351	0.462353	0.462354	0.462352	0.46235	0.462346	0.46234	0.462334	0.462326
																				0.461231	0.461555	0.46174	0.461872	0.461973	0.462053	0.462119	0.462173	0.462218	0.462256	0.462288	0.462314	0.462337	0.462355	0.46237	0.462381	0.46239	0.462396	0.4624	0.462402	0.462401	0.462399	0.462395	0.46239	0.462383	0.462374	0.462364	0.462353	0.46234	0.462327
																				0.461441	0.461746	0.461919	0.46204	0.462131	0.462203	0.462261	0.462307	0.462345	0.462376	0.462402	0.462422	0.462437	0.462449	0.462458	0.462463	0.462466	0.462466	0.462464	0.46246	0.462454	0.462446	0.462436	0.462425	0.462412	0.462397	0.462381	0.462364	0.462346	0.462326
																				0.461644	0.46193	0.462091	0.462202	0.462284	0.462348	0.462398	0.462437	0.462469	0.462493	0.462512	0.462525	0.462535	0.462541	0.462543	0.462543	0.46254	0.462534	0.462526	0.462516	0.462504	0.462491	0.462475	0.462458	0.462439	0.462419	0.462397	0.462374	0.46235	0.462324
																				0.461838	0.462107	0.462256	0.462357	0.462431	0.462487	0.46253	0.462563	0.462587	0.462605	0.462618	0.462626	0.462629	0.46263	0.462626	0.46262	0.462611	0.4626	0.462586	0.462571	0.462553	0.462534	0.462513	0.46249	0.462465	0.462439	0.462412	0.462383	0.462352	0.462321
																				0.462024	0.462277	0.462415	0.462507	0.462573	0.462622	0.462658	0.462684	0.462702	0.462714	0.462721	0.462723	0.462721	0.462715	0.462706	0.462695	0.46268	0.462664	0.462644	0.462623	0.4626	0.462575	0.462548	0.46252	0.46249	0.462458	0.462425	0.46239	0.462354	0.462316
																				0.462204	0.462441	0.462568	0.462651	0.462709	0.462751	0.462781	0.462801	0.462813	0.462819	0.46282	0.462817	0.462809	0.462798	0.462784	0.462767	0.462747	0.462725	0.4627	0.462674	0.462645	0.462615	0.462582	0.462548	0.462513	0.462475	0.462436	0.462395	0.462353	0.462309
																				0.462376	0.462598	0.462715	0.46279	0.462841	0.462876	0.4629	0.462914	0.46292	0.462921	0.462917	0.462908	0.462895	0.462878	0.462859	0.462837	0.462812	0.462784	0.462754	0.462722	0.462688	0.462653	0.462615	0.462575	0.462534	0.462491	0.462446	0.462399	0.462351	0.462301
																				0.462542	0.46275	0.462857	0.462924	0.462969	0.462997	0.463014	0.463023	0.463024	0.463019	0.46301	0.462995	0.462977	0.462956	0.462931	0.462904	0.462874	0.462841	0.462806	0.462769	0.46273	0.462688	0.462645	0.4626	0.462553	0.462504	0.462454	0.462401	0.462347	0.462291
																				0.462702	0.462896	0.462994	0.463054	0.463091	0.463114	0.463125	0.463128	0.463124	0.463114	0.463099	0.46308	0.463057	0.463031	0.463001	0.462969	0.462933	0.462896	0.462856	0.462813	0.462769	0.462722	0.462674	0.462623	0.462571	0.462516	0.46246	0.462402	0.462342	0.462279
																				0.462857	0.463038	0.463126	0.463179	0.46321	0.463226	0.463232	0.46323	0.463221	0.463206	0.463186	0.463162	0.463134	0.463103	0.463068	0.463031	0.462991	0.462948	0.462903	0.462856	0.462806	0.462754	0.4627	0.462644	0.462586	0.462526	0.462464	0.4624	0.462334	0.462265
																				0.463006	0.463174	0.463254	0.463299	0.463324	0.463335	0.463336	0.463328	0.463314	0.463294	0.46327	0.463241	0.463208	0.463172	0.463133	0.463091	0.463046	0.462998	0.462948	0.462896	0.462841	0.462784	0.462725	0.462664	0.4626	0.462534	0.462466	0.462396	0.462324	0.462249
																				0.463149	0.463305	0.463377	0.463416	0.463435	0.46344	0.463435	0.463423	0.463404	0.463379	0.46335	0.463317	0.463279	0.463239	0.463195	0.463148	0.463098	0.463046	0.462991	0.462933	0.462874	0.462812	0.462747	0.46268	0.462611	0.46254	0.462466	0.46239	0.462311	0.46223
																				0.463288	0.463432	0.463496	0.463528	0.463541	0.463541	0.463532	0.463514	0.46349	0.463461	0.463427	0.463389	0.463347	0.463302	0.463254	0.463202	0.463148	0.463091	0.463031	0.462969	0.462904	0.462837	0.462767	0.462695	0.46262	0.462543	0.462463	0.462381	0.462296	0.462209
																				0.463422	0.463555	0.463611	0.463637	0.463644	0.463639	0.463624	0.463602	0.463574	0.46354	0.463501	0.463459	0.463413	0.463363	0.46331	0.463254	0.463195	0.463133	0.463068	0.463001	0.462931	0.462859	0.462784	0.462706	0.462626	0.462543	0.462458	0.46237	0.462278	0.462184
																				0.463552	0.463673	0.463722	0.463741	0.463743	0.463732	0.463713	0.463686	0.463653	0.463615	0.463572	0.463525	0.463475	0.46342	0.463363	0.463302	0.463239	0.463172	0.463103	0.463031	0.462956	0.462878	0.462798	0.462715	0.46263	0.462541	0.462449	0.462355	0.462257	0.462156
																				0.463677	0.463787	0.463828	0.463842	0.463838	0.463823	0.463798	0.463767	0.463729	0.463687	0.46364	0.463588	0.463533	0.463475	0.463413	0.463347	0.463279	0.463208	0.463134	0.463057	0.462977	0.462895	0.462809	0.462721	0.462629	0.462535	0.462437	0.462337	0.462232	0.462125
																				0.463798	0.463897	0.463931	0.463938	0.463929	0.463909	0.46388	0.463844	0.463802	0.463755	0.463703	0.463648	0.463588	0.463525	0.463459	0.463389	0.463317	0.463241	0.463162	0.46308	0.462995	0.462908	0.462817	0.462723	0.462626	0.462525	0.462422	0.462314	0.462204	0.462089
																				0.463914	0.464003	0.46403	0.464031	0.464017	0.463991	0.463957	0.463917	0.46387	0.463819	0.463763	0.463703	0.46364	0.463572	0.463501	0.463427	0.46335	0.46327	0.463186	0.463099	0.46301	0.462917	0.46282	0.462721	0.462618	0.462512	0.462402	0.462288	0.46217	0.462048
																				0.464027	0.464106	0.464125	0.46412	0.4641	0.46407	0.464031	0.463986	0.463935	0.463879	0.463819	0.463755	0.463687	0.463615	0.46354	0.463461	0.463379	0.463294	0.463206	0.463114	0.463019	0.462921	0.462819	0.462714	0.462605	0.462493	0.462376	0.462256	0.462131	0.462002
																				0.464135	0.464204	0.464216	0.464204	0.464179	0.464144	0.4641	0.464051	0.463995	0.463935	0.46387	0.463802	0.463729	0.463653	0.463574	0.46349	0.463404	0.463314	0.463221	0.463124	0.463024	0.46292	0.462813	0.462702	0.462587	0.462469	0.462345	0.462218	0.462086	0.461949
																				0.46424	0.464297	0.464302	0.464285	0.464254	0.464213	0.464165	0.46411	0.464051	0.463986	0.463917	0.463844	0.463767	0.463686	0.463602	0.463514	0.463423	0.463328	0.46323	0.463128	0.463023	0.462914	0.462801	0.462684	0.462563	0.462437	0.462307	0.462173	0.462033	0.461888
																				0.46434	0.464387	0.464384	0.46436	0.464323	0.464277	0.464224	0.464165	0.4641	0.464031	0.463957	0.46388	0.463798	0.463713	0.463624	0.463532	0.463435	0.463336	0.463232	0.463125	0.463014	0.4629	0.462781	0.462658	0.46253	0.462398	0.462261	0.462119	0.461971	0.461818
																				0.464436	0.464472	0.464461	0.46443	0.464388	0.464336	0.464277	0.464213	0.464144	0.46407	0.463991	0.463909	0.463823	0.463732	0.463639	0.463541	0.46344	0.463335	0.463226	0.463114	0.462997	0.462876	0.462751	0.462622	0.462487	0.462348	0.462203	0.462053	0.461897	0.461735
																				0.464528	0.464551	0.464532	0.464494	0.464445	0.464388	0.464323	0.464254	0.464179	0.4641	0.464017	0.463929	0.463838	0.463743	0.463644	0.463541	0.463435	0.463324	0.46321	0.463091	0.462969	0.462841	0.462709	0.462573	0.462431	0.462284	0.462131	0.461973	0.461808	0.461636
																				0.464614	0.464625	0.464596	0.46455	0.464494	0.46443	0.46436	0.464285	0.464204	0.46412	0.464031	0.463938	0.463842	0.463741	0.463637	0.463528	0.463416	0.463299	0.463179	0.463054	0.462924	0.46279	0.462651	0.462507	0.462357	0.462202	0.46204	0.461872	0.461697	0.461515
																				0.464694	0.464689	0.46465	0.464596	0.464532	0.464461	0.464384	0.464302	0.464216	0.464125	0.46403	0.463931	0.463828	0.463722	0.463611	0.463496	0.463377	0.463254	0.463126	0.462994	0.462857	0.462715	0.462568	0.462415	0.462256	0.462091	0.461919	0.46174	0.461554	0.46136
																				0.464764	0.464742	0.464689	0.464625	0.464551	0.464472	0.464387	0.464297	0.464204	0.464106	0.464003	0.463897	0.463787	0.463673	0.463555	0.463432	0.463305	0.463174	0.463038	0.462896	0.46275	0.462598	0.462441	0.462277	0.462107	0.46193	0.461746	0.461555	0.461355	0.461146
																				0.464812	0.464764	0.464694	0.464614	0.464528	0.464436	0.46434	0.46424	0.464135	0.464027	0.463914	0.463798	0.463677	0.463552	0.463422	0.463288	0.463149	0.463006	0.462857	0.462702	0.462542	0.462376	0.462204	0.462024	0.461838	0.461644	0.461441	0.461231	0.46101	0.46078
[truncated: 131 more columns]
