# Supplementary material for: Trajectories and Forces in Four-Electrode Chambers Operated in Object-Shift, Dielectrophoresis and Field-Cage Modes – Considerations from the System’s Point of View
Source: Preprints.org preprint supplement (doi:10.20944/preprints202309.2147.v1), 2023-09-30
Supplement: Supplementary file 8 [file Tab. S7_+++-_Norm. Force_Force ratio.xlsx]

## Sheet: Reversibilität +++-
Cond_+++-, 0.1 in 1	Cond_+++-, 1 in 0.1	x		norm. Force_0.1 in 1	norm. Force_1 in 0.1	x_force	Force ratio +++-		XSmooth	YSmooth		Force ratio_Plane vs. Pointed
0.21645	0.034899	-0.40201		49.9395	-5.76609	-0.399497	-0.115462		-0.399497	-0.128195		7.11639
0.298609	0.03395	-0.396985		6.32761	-1.73773	-0.394472	-0.274626		-0.391507	-0.293506		4.1406
0.309019	0.033664	-0.39196		2.7991	-0.868863	-0.389447	-0.310408		-0.383517	-0.374617		3.0975
0.313624	0.033521	-0.386935		1.63448	-0.583293	-0.384422	-0.356867		-0.375527	-0.42479		2.52229
0.316313	0.033425	-0.381909		1.08439	-0.431394	-0.379397	-0.397823		-0.367537	-0.479105		2.15158
0.318097	0.033354	-0.376884		0.775603	-0.340254	-0.374372	-0.438696		-0.359547	-0.534314		1.891
0.319373	0.033298	-0.371859		0.58231	-0.279494	-0.369347	-0.479975		-0.351557	-0.571474		1.69651
0.320331	0.033252	-0.366834		0.452841	-0.224811	-0.364322	-0.496446		-0.343567	-0.605022		1.54441
0.321076	0.033215	-0.361809		0.362272	-0.194431	-0.359296	-0.536698		-0.335577	-0.634019		1.42068
0.321672	0.033183	-0.356784		0.296018	-0.164051	-0.354271	-0.554193		-0.327587	-0.663407		1.31649
0.322159	0.033156	-0.351759		0.244959	-0.145823	-0.349246	-0.595295		-0.319597	-0.68483		1.226
0.322562	0.033132	-0.346734		0.206665	-0.127595	-0.344221	-0.6174		-0.311608	-0.694086		1.14521
0.322902	0.033111	-0.341708		0.175666	-0.103291	-0.339196	-0.588		-0.303618	-0.695306		1.07129
0.323191	0.033094	-0.336683		0.150744	-0.0972154	-0.334171	-0.644903		-0.295628	-0.711241		1.00217
0.323439	0.033078	-0.331658		0.130078	-0.0850635	-0.329146	-0.653944		-0.287638	-0.729036		0.936356
0.323653	0.033064	-0.326633		0.113666	-0.0789875	-0.324121	-0.694909		-0.279648	-0.758826		0.872726
0.32384	0.033051	-0.321608		0.0996857	-0.0668356	-0.319095	-0.670463		-0.271658	-0.730525		0.810447
0.324004	0.03304	-0.316583		0.0875289	-0.0607596	-0.31407	-0.694167		-0.263668	-0.722243		0.748908
0.324148	0.03303	-0.311558		0.0771956	-0.0546837	-0.309045	-0.708378		-0.255678	-0.717231		0.68767
0.324275	0.033021	-0.306533		0.0686859	-0.0486077	-0.30402	-0.707681		-0.247688	-0.677138		0.626435
0.324388	0.033013	-0.301507		0.060784	-0.0425318	-0.298995	-0.69972		-0.239698	-0.749131		0.56502
0.324488	0.033006	-0.296482		0.0540977	-0.0364558	-0.29397	-0.673888		-0.231708	-0.952645		0.503337
0.324577	0.033	-0.291457		0.0486272	-0.0364558	-0.288945	-0.7497		-0.223718	-0.332385		0.441379
0.324657	0.032994	-0.286432		0.0425488	-0.0303798	-0.28392	-0.714		-0.215728	-0.254603		0.379206
0.324727	0.032989	-0.281407		0.0382939	-0.0303798	-0.278894	-0.793333		-0.207738	-0.481225		0.316935
0.32479	0.032984	-0.276382		0.0346469	-0.0243039	-0.273869	-0.701474		-0.199748	-1.08346		0.254724
0.324847	0.03298	-0.271357		0.0297841	-0.0243039	-0.268844	-0.816		-0.191758	-1.42503		0.192768
0.324896	0.032976	-0.266332		0.0273528	-0.0182279	-0.263819	-0.6664		-0.183768	-1.5594		0.131285
0.324941	0.032973	-0.261306		0.0237057	-0.0182279	-0.258794	-0.768923		-0.175778	-1.34491		0.0705034
0.32498	0.03297	-0.256281		0.0206665	-0.0121519	-0.253769	-0.588		-0.167788	-0.87954		0.0106612
0.325014	0.032968	-0.251256		0.018843	-0.0121519	-0.248744	-0.644903		-0.159798	-0.918398		-0.048009
0.325045	0.032966	-0.246231		0.0158038	-0.0121519	-0.243719	-0.768923		-0.151809	-0.968925		-0.105284
0.325071	0.032964	-0.241206		0.0133725	-0.0121519	-0.238693	-0.908727		-0.143819	-1.04772		-0.160959
0.325093	0.032962	-0.236181		0.011549	-0.00607597	-0.233668	-0.526105		-0.135829	-0.99896		-0.214846
0.325112	0.032961	-0.231156		0.00972543	-0.00607597	-0.228643	-0.62475		-0.127839	-1.03406		-0.266786
0.325128	0.03296	-0.226131		0.00790192	-0.00607597	-0.223618	-0.768923		-0.119849	-0.984346		-0.316646
0.325141	0.032959	-0.221105		0.0060784	-0.00607597	-0.218593	-0.9996		-0.111859	-0.938079		-0.364318
0.325151	0.032958	-0.21608		0.00425488	0	-0.213568	0		-0.103869	-0.960432		-0.409728
0.325158	0.032958	-0.211055		0.0030392	0	-0.208543	0		-0.0958789	-0.97888		-0.452825
0.325163	0.032958	-0.20603		0.00121568	0	-0.203518	0		-0.0878889	-0.958834		-0.493585
0.325165	0.032958	-0.201005		0	0	-0.198492	0		-0.079899	-0.980926		-0.532011
0.325165	0.032958	-0.19598		-0.00121568	0.00607597	-0.193467	-4.998		-0.071909	-0.968111		-0.568123
0.325163	0.032959	-0.190955		-0.00243136	0	-0.188442	0		-0.0639191	-0.968368		-0.601964
0.325159	0.032959	-0.18593		-0.00364704	0.00607597	-0.183417	-1.666		-0.0559291	-0.963549		-0.63359
0.325153	0.03296	-0.180904		-0.00486272	0.00607597	-0.178392	-1.2495		-0.0479392	-0.985117		-0.663071
0.325145	0.032961	-0.175879		-0.00668624	0.00607597	-0.173367	-0.908727		-0.0399492	-0.98259		-0.69049
0.325134	0.032962	-0.170854		-0.00729407	0.00607597	-0.168342	-0.833		-0.0319593	-0.961911		-0.715933
0.325122	0.032963	-0.165829		-0.00850975	0.0121519	-0.163317	-1.428		-0.0239693	-0.966984		-0.739497
0.325108	0.032965	-0.160804		-0.00911759	0.0121519	-0.158291	-1.3328		-0.0159794	-0.945435		-0.761279
0.325093	0.032967	-0.155779		-0.0109411	0.00607597	-0.153266	-0.555333		-0.00798945	-0.948613		-0.781379
0.325075	0.032968	-0.150754		-0.011549	0.0121519	-0.148241	-1.05221		5e-07	-0.974358		-0.799898
0.325056	0.03297	-0.145729		-0.0121568	0.0121519	-0.143216	-0.9996		0.00799045	-0.983021		-0.816936
0.325036	0.032972	-0.140703		-0.0139803	0.0182279	-0.138191	-1.30383		0.0159804	-0.965071		-0.832589
0.325013	0.032975	-0.135678		-0.0145881	0.0121519	-0.133166	-0.833		0.0239704	-0.979636		-0.846952
0.324989	0.032977	-0.130653		-0.0158038	0.0182279	-0.128141	-1.15338		0.0319603	-0.96728		-0.860117
0.324963	0.03298	-0.125628		-0.0164117	0.0121519	-0.123116	-0.740444		0.0399503	-0.962971		-0.872171
0.324936	0.032982	-0.120603		-0.0176273	0.0182279	-0.11809	-1.03407		0.0479402	-0.970324		-0.883197
0.324907	0.032985	-0.115578		-0.0182352	0.0182279	-0.113065	-0.9996		0.0559302	-0.977108		-0.893273
0.324877	0.032988	-0.110553		-0.0194509	0.0182279	-0.10804	-0.937125		0.0639201	-0.974288		-0.902473
0.324845	0.032991	-0.105528		-0.0200587	0.0182279	-0.103015	-0.908727		0.0719101	-0.987591		-0.910868
0.324812	0.032994	-0.100502		-0.0218822	0.0243039	-0.0979899	-1.11067		0.0799	-0.975217		-0.918521
0.324776	0.032998	-0.0954773		-0.0218822	0.0182279	-0.0929648	-0.833		0.08789	-0.967724		-0.925494
0.32474	0.033001	-0.0904522		-0.0230979	0.0243039	-0.0879396	-1.05221		0.0958799	-0.967024		-0.931842
0.324702	0.033005	-0.0854271		-0.0243136	0.0243039	-0.0829145	-0.9996		0.10387	-0.966763		-0.937617
0.324662	0.033009	-0.080402		-0.0249214	0.0243039	-0.0778894	-0.97522		0.11186	-0.974779		-0.942869
0.324621	0.033013	-0.0753768		-0.0261371	0.0243039	-0.0728643	-0.92986		0.11985	-0.974161		-0.947641
0.324578	0.033017	-0.0703517		-0.0273528	0.0243039	-0.0678391	-0.888533		0.12784	-0.979605		-0.951974
0.324533	0.033021	-0.0653266		-0.0279606	0.0303798	-0.062814	-1.08652		0.13583	-0.968166		-0.955907
0.324487	0.033026	-0.0603015		-0.0285685	0.0303798	-0.0577889	-1.0634		0.14382	-0.974024		-0.959473
0.32444	0.033031	-0.0552763		-0.0297841	0.0243039	-0.0527638	-0.816		0.15181	-0.967521		-0.962705
0.324391	0.033035	-0.0502512		-0.0309998	0.0303798	-0.0477386	-0.98		0.1598	-0.967333		-0.965631
0.32434	0.03304	-0.0452261		-0.0316077	0.0303798	-0.0427135	-0.961154		0.167789	-0.972143		-0.968279
0.324288	0.033045	-0.040201		-0.0334312	0.0364558	-0.0376884	-1.09047		0.175779	-0.967993		-0.970673
0.324233	0.033051	-0.0351758		-0.0334312	0.0303798	-0.0326633	-0.908727		0.183769	-0.964858		-0.972834
0.324178	0.033056	-0.0301507		-0.0352547	0.0364558	-0.0276381	-1.03407		0.191759	-0.962692		-0.974784
0.32412	0.033062	-0.0251256		-0.0358625	0.0303798	-0.022613	-0.847119		0.199749	-0.968709		-0.97654
0.324061	0.033067	-0.0201005		-0.0370782	0.0364558	-0.0175879	-0.983213		0.207739	-0.971575		-0.97812
0.324	0.033073	-0.0150753		-0.0376861	0.0364558	-0.0125628	-0.967355		0.215729	-0.965231		-0.979539
0.323938	0.033079	-0.0100502		-0.0395096	0.0364558	-0.00753764	-0.922708		0.223719	-0.959826		-0.98081
0.323873	0.033085	-0.00502508		-0.0401174	0.0425318	-0.00251251	-1.06018		0.231709	-0.955717		-0.981948
0.323807	0.033092	5.02513e-08		-0.0413331	0.0364558	0.00251261	-0.882		0.239699	-0.956487		-0.982962
0.323739	0.033098	0.00502518		-0.0425488	0.0425318	0.00753774	-0.9996		0.247689	-0.954116		-0.983864
0.323669	0.033105	0.0100503		-0.0437645	0.0425318	0.0125629	-0.971833		0.255679	-0.952906		-0.984664
0.323597	0.033112	0.0150754		-0.0449801	0.0425318	0.017588	-0.945568		0.263669	-0.949306		-0.985369
0.323523	0.033119	0.0201006		-0.045588	0.0486077	0.0226131	-1.06624		0.271659	-0.946261		-0.985987
0.323448	0.033127	0.0251257		-0.0474115	0.0425318	0.0276382	-0.897077		0.279649	-0.943416		-0.986526
0.32337	0.033134	0.0301508		-0.049235	0.0486077	0.0326634	-0.987259		0.287639	-0.938079		-0.986992
0.323289	0.033142	0.0351759		-0.0498428	0.0486077	0.0376885	-0.97522		0.295629	-0.932993		-0.987391
0.323207	0.03315	0.0402011		-0.0510585	0.0486077	0.0427136	-0.952		0.303619	-0.928145		-0.987727
0.323123	0.033158	0.0452262		-0.052882	0.0546837	0.0477387	-1.03407		0.311609	-0.923559		-0.988006
0.323036	0.033167	0.0502513		-0.0547056	0.0486077	0.0527639	-0.888533		0.319599	-0.916543		-0.988231
0.322946	0.033175	0.0552764		-0.0559212	0.0546837	0.057789	-0.97787		0.327588	-0.908553		-0.988407
0.322854	0.033184	0.0603016		-0.0571369	0.0607596	0.0628141	-1.0634		0.335578	-0.899901		-0.988536
0.32276	0.033194	0.0653267		-0.0589604	0.0546837	0.0678392	-0.927464		0.343568	-0.891138		-0.988622
0.322663	0.033203	0.0703518		-0.060784	0.0607596	0.0728644	-0.9996		0.351558	-0.883065		-0.988667
0.322563	0.033213	0.0753769		-0.0626075	0.0607596	0.0778895	-0.970485		0.359548	-0.891559		-0.988673
0.32246	0.033223	0.0804021		-0.064431	0.0607596	0.0829146	-0.943019		0.367538	-0.887139		-0.988643
0.322354	0.033233	0.0854272		-0.0662545	0.0668356	0.0879397	-1.00877		0.375528	-0.850769		-0.988578
0.322245	0.033244	0.0904523		-0.0686859	0.0668356	0.0929649	-0.973062		0.383518	-0.803916		-0.98848
0.322132	0.033255	0.0954774		-0.0705094	0.0668356	0.09799	-0.947897		0.391508	-1.02745		-0.988349
0.322016	0.033266	0.100503		-0.0723329	0.0668356	0.103015	-0.924		0.399498	-2.04985		-0.988188
0.321897	0.033277	0.105528		-0.0753721	0.0789875	0.10804	-1.04797					-0.987996
0.321773	0.03329	0.110553		-0.0771956	0.0729116	0.113065	-0.944504					-0.987775
0.321646	0.033302	0.115578		-0.0802348	0.0789875	0.118091	-0.984455					-0.987525
0.321514	0.033315	0.120603		-0.0826662	0.0789875	0.123116	-0.9555					-0.987246
0.321378	0.033328	0.125628		-0.0857054	0.0850635	0.128141	-0.992511					-0.986938
0.321237	0.033342	0.130653		-0.0887446	0.0850635	0.133166	-0.958521					-0.986602
0.321091	0.033356	0.135678		-0.0917838	0.0911395	0.138191	-0.99298					-0.986237
0.32094	0.033371	0.140704		-0.0954308	0.0911395	0.143216	-0.955032					-0.985842
0.320783	0.033386	0.145729		-0.0990779	0.0972154	0.148241	-0.981202					-0.985418
0.32062	0.033402	0.150754		-0.102725	0.0972154	0.153266	-0.946367					-0.984964
0.320451	0.033418	0.155779		-0.107588	0.103291	0.158292	-0.960068					-0.984479
0.320274	0.033435	0.160804		-0.111235	0.109367	0.163317	-0.983213					-0.983962
0.320091	0.033453	0.165829		-0.116097	0.115443	0.168342	-0.994367					-0.983412
0.3199	0.033472	0.170854		-0.12096	0.115443	0.173367	-0.954392					-0.982827
0.319701	0.033491	0.175879		-0.127038	0.121519	0.178392	-0.956555					-0.982207
0.319492	0.033511	0.180905		-0.131901	0.127595	0.183417	-0.967355					-0.981551
0.319275	0.033532	0.18593		-0.138587	0.133671	0.188442	-0.964526					-0.980855
0.319047	0.033554	0.190955		-0.145274	0.139747	0.193467	-0.961958					-0.980119
0.318808	0.033577	0.19598		-0.152568	0.145823	0.198493	-0.955793					-0.97934
0.318557	0.033601	0.201005		-0.159862	0.157975	0.203518	-0.988198					-0.978516
0.318294	0.033627	0.20603		-0.168979	0.164051	0.208543	-0.970835					-0.977646
0.318016	0.033654	0.211055		-0.177489	0.170127	0.213568	-0.958521					-0.976725
0.317724	0.033682	0.21608		-0.187215	0.182279	0.218593	-0.973636					-0.975751
0.317416	0.033712	0.221106		-0.198156	0.188355	0.223618	-0.95054					-0.974722
0.31709	0.033743	0.226131		-0.209705	0.200507	0.228643	-0.956139					-0.973633
0.316745	0.033776	0.231156		-0.222469	0.212659	0.233668	-0.955902					-0.972482
0.316379	0.033811	0.236181		-0.23645	0.224811	0.238694	-0.950776					-0.971264
0.31599	0.033848	0.241206		-0.251646	0.243039	0.243719	-0.965797					-0.969974
0.315576	0.033888	0.246231		-0.268057	0.255191	0.248744	-0.952					-0.968608
0.315135	0.03393	0.251256		-0.286292	0.273418	0.253769	-0.955032					-0.967162
0.314664	0.033975	0.256281		-0.306959	0.291646	0.258794	-0.950115					-0.965628
0.314159	0.034023	0.261307		-0.328841	0.309874	0.263819	-0.942322					-0.964002
0.313618	0.034074	0.266332		-0.353763	0.334178	0.268844	-0.944639					-0.962277
0.313036	0.034129	0.271357		-0.381723	0.364558	0.273869	-0.955032					-0.960446
0.312408	0.034189	0.276382		-0.412115	0.388862	0.278895	-0.943575					-0.958501
0.31173	0.034253	0.281407		-0.446762	0.419242	0.28392	-0.9384					-0.956433
0.310995	0.034322	0.286432		-0.485664	0.455697	0.288945	-0.938298					-0.954234
0.310196	0.034397	0.291457		-0.529428	0.492153	0.29397	-0.929594					-0.951893
0.309325	0.034478	0.296482		-0.579879	0.540761	0.298995	-0.932541					-0.949399
0.308371	0.034567	0.301508		-0.6358	0.589369	0.30402	-0.926971					-0.946742
0.307325	0.034664	0.306533		-0.701447	0.650128	0.309045	-0.926839					-0.943908
0.306171	0.034771	0.311558		-0.776211	0.716964	0.31407	-0.923671					-0.940885
0.304894	0.034889	0.316583		-0.86374	0.789875	0.319096	-0.914483					-0.937658
0.303473	0.035019	0.321608		-0.965857	0.881015	0.324121	-0.912159					-0.934213
0.301884	0.035164	0.326633		-1.0856	0.984306	0.329146	-0.906692					-0.930536
0.300098	0.035326	0.331658		-1.22905	1.10583	0.334171	-0.899739					-0.926617
0.298076	0.035508	0.336683		-1.40107	1.25772	0.339196	-0.897689					-0.922448
0.295771	0.035715	0.341709		-1.61138	1.43393	0.344221	-0.889874					-0.918035
0.29312	0.035951	0.346734		-1.86971	1.65266	0.349246	-0.883912					-0.913403
0.290044	0.036223	0.351759		-2.19491	1.92608	0.354271	-0.877522					-0.908626
0.286433	0.03654	0.356784		-2.61189	2.27241	0.359297	-0.870027					-0.90387
0.282136	0.036914	0.361809		-3.15773	2.72811	0.364322	-0.863947					-0.899505
0.276941	0.037363	0.366834		-3.89564	3.32963	0.369347	-0.854706					-0.896349
0.270532	0.037911	0.371859		-4.93201	4.19849	0.374372	-0.851274					-0.896248
0.262418	0.038602	0.376884		-6.46437	5.50482	0.379397	-0.851563					-0.903541
0.251783	0.039508	0.38191		-8.90728	7.72255	0.384422	-0.866993					-0.929371
0.237129	0.040779	0.386935		-13.3196	12.3707	0.389447	-0.928757					-1.00954
0.215216	0.042815	0.39196		-23.5009	27.9677	0.394472	-1.19007					-1.32844
0.176553	0.047418	0.396985		-71.7901	150.356	0.399498	-2.09438					-2.56649
0.058446	0.072164	0.40201
